# Supplementary material for: Pathogenic pathways are activated in each major cell type of the glomerulus in the Cd2ap mutant mouse model of focal segmental glomerulosclerosis
Source: BMC Nephrol. 2015 May 13;16:71. doi: 10.1186/s12882-015-0063-z (PMC4430919; doi:10.1186/s12882-015-0063-z)
Supplement: Additional file 1: Table S1. — Microarray defined genes upregulated in Cd2ap mutant mesangial cells. Filtered for fold change > 1.5 and raw signal > 100. Columns show gene symbol, fold change, gene description, RNA-seq validation with P < 0.05, RNA seq validation fold change and transcript cluster ID. [file 12882_2015_63_MOESM1_ESM.xls]

Gene symbol	Fold Change	Gene Description	RNA-seq P<0.05	RNA-seq FC	Transcripts Cluster Id
Aldh1a2	8.6887245	"aldehyde dehydrogenase family 1, subfamily A2"	yes	27	10586865
Tslp	5.878133	thymic stromal lymphopoietin	yes	43	10454601
Frzb	5.8591113	frizzled-related protein	yes	13	10484307
Fn1	5.301511	fibronectin 1	yes	38	10355403
Fam19a1	5.1902866	"family with sequence similarity 19, member A1"	yes	11	10540233
Thbs1	4.615529	thrombospondin 1	yes	11	10474700
Ptgs2	4.2490296	prostaglandin-endoperoxide synthase 2	yes	18	10350516
Errfi1	4.207536	ERBB receptor feedback inhibitor 1	yes	10	10510574
Col14a1	4.1792355	"collagen, type XIV, alpha 1"	yes	22	10424140
Ociad2	4.1758018	OCIA domain containing 2	yes	5	10530615
Ccdc68	4.153327	coiled-coil domain containing 68	yes	9	10456545
Ankrd1	4.074316	ankyrin repeat domain 1 (cardiac muscle)	yes	7	10467191
Galnt3	4.0318	UDP-N-acetyl-alpha-D-galactosamine:polypeptide N-acetylgalactosaminyltransferase 3	yes	30	10483249
Dpep1	3.8188837	dipeptidase 1 (renal)	yes	17	10576235
Clca1	3.7410557	chloride channel calcium activated 1	yes	12	10502552
Col12a1	3.6844883	"collagen, type XII, alpha 1"	yes	8	10595211
Cyp1b1|1700038P13Rik	3.4097269	"cytochrome P450, family 1, subfamily b, polypeptide 1 | RIKEN cDNA 1700038P13 gene"	yes	10	10453057
Igfbp3	3.29807	insulin-like growth factor binding protein 3	yes	27	10384223
Limch1	3.2796042	LIM and calponin homology domains 1	yes	9	10522217
Pcdh7	3.061667	protocadherin 7	yes	11	10521972
Usp53	2.9642673	ubiquitin specific peptidase 53	yes	4	10501879
Sulf1	2.9031591	sulfatase 1	yes	7	10344897
Tnnt2	2.7682896	"troponin T2, cardiac"	yes	7	10350173
Alox5ap	2.7516038	arachidonate 5-lipoxygenase activating protein	yes	5	10527638
C1qtnf7	2.7398458	C1q and tumor necrosis factor related protein 7	yes	9	10521616
Abcb1a	2.714677	"ATP-binding cassette, sub-family B (MDR/TAP), member 1A"	yes	4	10519527
Cxcl10	2.6898513	chemokine (C-X-C motif) ligand 10	yes	3	10531415
Prss23	2.6164937	"protease, serine, 23"	yes	1.8	10554814
Rnase4|Ang	2.5891418	"ribonuclease, RNase A family 4 | angiogenin, ribonuclease, RNase A family, 5"	yes	4	10414537
Ccl2	2.517012	chemokine (C-C motif) ligand 2	yes	7	10379511
Csrp2	2.4820843	cysteine and glycine-rich protein 2	yes	3	10366293
Clca2|Clca1	2.4572575	chloride channel calcium activated 2 | chloride channel calcium activated 1	yes	12	10502565
Pmp22	2.4433792	peripheral myelin protein 22	yes	5	10376950
Ngf	2.4242225	nerve growth factor	yes	3	10494817
Slc43a3	2.4104323	"solute carrier family 43, member 3"	yes	7	10473384
Fbln5	2.3766737	fibulin 5	yes	4	10402211
Cpne7	2.3716214	copine VII	yes	6	10576218
Taf1d	2.3569746	"TATA box binding protein (Tbp)-associated factor, RNA polymerase I, D"	yes	1.7	10583312
Loxl2	2.3355742	lysyl oxidase-like 2	yes	4	10416215
Cygb	2.3336535	cytoglobin	yes	4	10393364
Ogn	2.3216102	osteoglycin	yes	4	10405063
Nrxn2	2.3100004	neurexin II	No		10465424
Mt2	2.289118	metallothionein 2	yes	8	10574023
Cdo1	2.265559	"cysteine dioxygenase 1, cytosolic"	yes	4	10458828
Plekhf1	2.2553573	"pleckstrin homology domain containing, family F (with FYVE domain) member 1"	yes	4	10562576
Spp1	2.2325485	secreted phosphoprotein 1	yes	237	10523717
Dcn	2.1917212	decorin	yes	6	10365974
Nr1d1|Thra	2.1916487	"nuclear receptor subfamily 1, group D, member 1 | thyroid hormone receptor alpha"	yes	2	10390691
Gjb2|Gm10871	2.1677284	"gap junction protein, beta 2 | predicted gene 10871"	yes	3	10420362
Myc	2.1623106	myelocytomatosis oncogene	yes	5	10424400
Cldn1	2.1341772	claudin 1	yes	3	10438769
S100a6	2.1317055	S100 calcium binding protein A6 (calcyclin)	yes	3	10493820
Snora75	2.1238606	"small nucleolar RNA, H/ACA box 75"	No		10356329
Lgals1	2.1166792	"lectin, galactose binding, soluble 1"	yes	3	10425161
Adamts9	2.1016343	"a disintegrin-like and metallopeptidase (reprolysin type) with thrombospondin type 1 motif, 9"	yes	2	10546432
Acta2	2.0988445	"actin, alpha 2, smooth muscle, aorta"	yes	3	10467124
Ctps	2.0986834	cytidine 5'-triphosphate synthase	yes	2	10515943
Col8a1	2.091576	"collagen, type VIII, alpha 1"	yes	4	10440091
Fzd7	2.0783398	frizzled homolog 7 (Drosophila)	yes	3	10346607
Slc10a6	2.0782895	"solute carrier family 10 (sodium/bile acid cotransporter family), member 6"	yes	5	10531887
Isoc1	2.0724137	isochorismatase domain containing 1	yes	3	10455912
Prkar2b	2.0516224	"protein kinase, cAMP dependent regulatory, type II beta"	yes	3	10399908
Adm	2.039538	adrenomedullin	yes	3	10556297
Tgfb3	2.025334	"transforming growth factor, beta 3"	yes	2	10401673
Fat4	2.019507	FAT tumor suppressor homolog 4 (Drosophila)	yes	4	10491732
Figf	2.0098627	c-fos induced growth factor	yes	4	10603099
Ier3	1.9915376	immediate early response 3	yes	5	10444890
Tnfsf8	1.9801295	"tumor necrosis factor (ligand) superfamily, member 8"	yes	8	10513729
Ptprq	1.9729303	"protein tyrosine phosphatase, receptor type, Q"	yes	5	10372235
Fjx1	1.968282	four jointed box 1 (Drosophila)	yes	4	10485402
Abca1	1.9650259	"ATP-binding cassette, sub-family A (ABC1), member 1"	yes	5	10512949
Uchl1	1.9283166	ubiquitin carboxy-terminal hydrolase L1	yes	6	10522208
Gm10115	1.9039419	predicted gene 10115			10479973
Hrct1	1.8797716	histidine rich carboxyl terminus 1	yes	3	10504417
Pi15	1.8630975	peptidase inhibitor 15	yes	2	10344981
Pdlim5	1.8555007	PDZ and LIM domain 5	yes	2	10502469
Mt1	1.8523281	metallothionein 1	yes	2	10574027
Sh3bp5	1.8488224	SH3-domain binding protein 5 (BTK-associated)	yes	3	10418702
Fam198b	1.8365409	"family with sequence similarity 198, member B"	yes	6	10492682
Pde7b	1.8349115	phosphodiesterase 7B	yes	2	10368175
Arrdc3	1.8280973	arrestin domain containing 3	yes	3	10406407
Anxa3	1.8193319	annexin A3	yes	3	10523451
Akap12	1.8183308	A kinase (PRKA) anchor protein (gravin) 12	yes	3	10367634
Slc15a3	1.8160602	"solute carrier family 15, member 3"	yes	4	10461558
Dennd4a	1.8137144	DENN/MADD domain containing 4A	yes	1.5	10586240
Bmp2	1.8113589	bone morphogenetic protein 2	yes	3	10476395
Mgp	1.8111686	matrix Gla protein	yes	1.8	10548879
Plau	1.7982278	"plasminogen activator, urokinase"	yes	3	10413047
Spn	1.791822	sialophorin	yes	4	10568174
Gsto1	1.7896041	glutathione S-transferase omega 1	yes	4	10463836
Cirbp	1.7885218	cold inducible RNA binding protein	yes	3	10364712
Tspan2	1.7830312	tetraspanin 2	yes	3	10494821
Wwp1	1.7719887	WW domain containing E3 ubiquitin protein ligase 1	yes	3	10511755
Dbp|Sphk2	1.7642664	D site albumin promoter binding protein | sphingosine kinase 2	yes	3	10553092
Ctsk	1.7572483	cathepsin K	yes	4	10494262
Tmem47	1.7548983	transmembrane protein 47	yes	3	10600597
Sat1	1.7495134	spermidine/spermine N1-acetyl transferase 1	yes	3	10607467
Gulp1	1.7410215	"GULP, engulfment adaptor PTB domain containing 1"	yes	3	10346000
Osmr	1.7381632	oncostatin M receptor	yes	2	10427471
Egr1	1.7325503	early growth response 1	yes	4	10454782
Tnfrsf12a	1.7320096	"tumor necrosis factor receptor superfamily, member 12a"	yes	3	10448307
B4galt5	1.7293963	"UDP-Gal:betaGlcNAc beta 1,4-galactosyltransferase, polypeptide 5"	yes	2	10489891
Snord95	1.7179619	"small nucleolar RNA, C/D box 95"	No		10375501
Fkbp5	1.7171398	FK506 binding protein 5	yes	2	10449452
Pcgf5	1.7129395	polycomb group ring finger 5	yes	2	10462683
Pdlim1	1.7084312	PDZ and LIM domain 1 (elfin)	yes	3	10467420
Zyx	1.7036208	zyxin	yes	2	10537770
Bmp4	1.7024462	bone morphogenetic protein 4	yes	2	10419261
Acer2	1.6839741	alkaline ceramidase 2	yes	3	10505779
1500012F01Rik|Znfx1	1.6770589	"RIKEN cDNA 1500012F01 gene | zinc finger, NFX1-type containing 1"			10478847
Prss23	1.6761988	"protease, serine, 23"	yes	1.8	10565456
Lgmn	1.6751364	legumain	yes	1.7	10402268
Lrrc8d	1.6736033	leucine rich repeat containing 8D	yes	4	10523772
Tgfb2	1.6712291	"transforming growth factor, beta 2"	yes	3	10360920
Ctnnal1	1.6703856	"catenin (cadherin associated protein), alpha-like 1"	yes	2	10513061
Cgnl1	1.6692704	cingulin-like 1	yes	3	10594855
Celf2	1.6626573	"CUGBP, Elav-like family member 2"	yes	2	10479950
D14Ertd449e	1.659555	"DNA segment, Chr 14, ERATO Doi 449, expressed"	yes	3	10418210
Cyp39a1	1.6593306	"cytochrome P450, family 39, subfamily a, polypeptide 1"	yes	3	10445308
Setbp1	1.6573281	SET binding protein 1	yes	2	10459905
C1qtnf3	1.6528965	C1q and tumor necrosis factor related protein 3	yes	4	10423080
Fbxl7	1.6524036	F-box and leucine-rich repeat protein 7	yes	1.8	10427904
Tuba8	1.6516526	"tubulin, alpha 8"	yes	1.7	10541301
Fam102b	1.6490749	"family with sequence similarity 102, member B"	yes	3	10501456
Nucb2	1.6445934	nucleobindin 2	yes	2	10556583
Serpine1	1.6271611	"serine (or cysteine) peptidase inhibitor, clade E, member 1"	yes	3	10534667
Gas5	1.6228601	growth arrest specific 5	yes	1.8	10351039
Tgif1	1.6198275	TGFB-induced factor homeobox 1	yes	3	10452633
Egr2	1.6177558	early growth response 2		2FC-but below 3 rpkm cutoff	10363735
B130024G19Rik	1.6163288	RIKEN cDNA B130024G19 gene			10554129
Capg	1.6126128	"capping protein (actin filament), gelsolin-like"	yes	2	10539135
2010002N04Rik	1.6031609	RIKEN cDNA 2010002N04 gene			10459071
Tox	1.6023643	thymocyte selection-associated high mobility group box	yes	1.7	10511416
Pde9a	1.6022185	phosphodiesterase 9A	yes	1.8	10443786
Nfkbiz	1.6009443	"nuclear factor of kappa light polypeptide gene enhancer in B-cells inhibitor, zeta"	yes	2	10439936
Rerg	1.5998224	"RAS-like, estrogen-regulated, growth-inhibitor"	yes	3	10548899
Vgll3	1.593653	vestigial like 3 (Drosophila)	yes	5	10436487
Ptbp2	1.5933992	polypyrimidine tract binding protein 2	yes	2	10501778
H6pd	1.591086	hexose-6-phosphate dehydrogenase (glucose 1-dehydrogenase)	yes	2	10518743
Il1r1	1.5854658	"interleukin 1 receptor, type I"	yes	2	10345762
Lrrc32	1.583194	leucine rich repeat containing 32	yes	3	10555174
Acot9	1.5831667	acyl-CoA thioesterase 9	yes	1.7	10602739
Bicc1	1.581026	bicaudal C homolog 1 (Drosophila)	yes	1.7	10369842
Slc7a5	1.5794636	"solute carrier family 7 (cationic amino acid transporter, y+ system), member 5"	yes	7	10582275
Slc38a2	1.5758642	"solute carrier family 38, member 2"	yes	2	10431894
Hmox1	1.5754806	heme oxygenase (decycling) 1	yes	3	10572897
Ppfibp1	1.5752695	"PTPRF interacting protein, binding protein 1 (liprin beta 1)"	yes	2	10542791
Ncrna00085	1.5673795	non-protein coding RNA 85	yes	1.7	10442087
Rftn1	1.5666643	raftlin lipid raft linker 1	yes	2	10451710
Cadm4	1.5661691	cell adhesion molecule 4	yes	2	10550915
Rundc3b	1.5543936	RUN domain containing 3B	yes	3	10528090
Atxn7l1	1.5486668	ataxin 7-like 1	yes	1.7	10395293
Snora23	1.5441071	"small nucleolar RNA, H/ACA box 23"	No		10556244
Cd302	1.5408435	CD302 antigen	yes	2	10482920
Slc25a24	1.5398202	"solute carrier family 25 (mitochondrial carrier, phosphate carrier), member 24"	yes	2	10495405
Rbm3	1.5384611	RNA binding motif protein 3	yes	2	10603469
Tspan4	1.5375091	tetraspanin 4	yes	1.8	10558961
Cx3cl1	1.5373644	chemokine (C-X3-C motif) ligand 1	yes	2	10574220
4932430I15Rik	1.53727	RIKEN cDNA 4932430I15 gene			10531479
Nhs	1.5361737	Nance-Horan syndrome (human)	yes	4	10607646
Gm8300|Gm2022|Gm4027|BB287469|Eif1a|Gm16368	1.5337044	predicted gene 8300 | predicted pseudogene 2022 | predicted gene 4027 | expressed sequence BB287469 | eukaryotic translation initiation factor 1A | eukaryotic translation initiation factor 1A pseudogene			10401829
Nlrc5	1.5304091	"NLR family, CARD domain containing 5"	yes	2	10574163
Glt25d1|Unc13a	1.529458	glycosyltransferase 25 domain containing 1 | unc-13 homolog A (C. elegans)	yes	2	10579548
Ifngr1	1.5267032	interferon gamma receptor 1	yes	3	10361897
Sparcl1	1.5263197	SPARC-like 1	yes	1.9	10531931
Eif1a	1.5233158	eukaryotic translation initiation factor 1A	yes	2	10455533
Cdkn2c	1.5200218	"cyclin-dependent kinase inhibitor 2C (p18, inhibits CDK4)"	yes	2	10515090
Igf1r	1.5179043	insulin-like growth factor I receptor	yes	2	10554094
Taf1d	1.5164745	"TATA box binding protein (Tbp)-associated factor, RNA polymerase I, D"	yes	1.7	10583297
Rbpms	1.5126342	RNA binding protein gene with multiple splicing	yes	1.9	10578123
Pcdhb17	1.5124166	protocadherin beta 17	No		10455112
Rplp1	1.5087225	"ribosomal protein, large, P1"	yes	1.3	10503833
Socs3	1.5087063	suppressor of cytokine signaling 3	yes	3	10393449
Nhsl1	1.5058894	NHS-like 1	yes	8	10361869
Bnip3	1.5048523	BCL2/adenovirus E1B interacting protein 3	yes	1.9	10414269
Pcdhb16	1.5021871	protocadherin beta 16	yes	1.9	10455108
