# Supplementary material for: Pathogenic pathways are activated in each major cell type of the glomerulus in the Cd2ap mutant mouse model of focal segmental glomerulosclerosis
Source: BMC Nephrol. 2015 May 13;16:71. doi: 10.1186/s12882-015-0063-z (PMC4430919; doi:10.1186/s12882-015-0063-z)
Supplement: Additional file 2: Table S2. — Microarray defined genes higher in wild type mesangial cells compared to Cd2ap mutant. Filtered for fold change > 1.5 and raw signal > 100. Columns show gene symbol, fold change, gene description, RNA-seq validation with P < 0.05, RNA seq validation fold change and transcript cluster ID. [file 12882_2015_63_MOESM2_ESM.xls]

Category	Name	p-value	q-value FDR B&H	q-value FDR B&Y	Hit Count in Query List	Hit Count in Genome	Hit in Query List
GO: Molecular Function	protein-lipid complex binding	1.93E-05	5.76E-03	4.01E-02	5	26	"MSR1,MAPT,STAB2,LDLR,CD36"
GO: Molecular Function	lipoprotein particle binding	1.93E-05	5.76E-03	4.01E-02	5	26	"MSR1,MAPT,STAB2,LDLR,CD36"
GO: Molecular Function	low-density lipoprotein particle binding	4.58E-05	9.13E-03	6.37E-02	4	16	"MSR1,STAB2,LDLR,CD36"
GO: Molecular Function	low-density lipoprotein receptor activity	4.45E-04	5.05E-02	3.52E-01	3	12	"STAB2,LDLR,CD36"
GO: Molecular Function	microsatellite binding	5.06E-04	5.05E-02	3.52E-01	2	3	"HEY1,HEY2"
GO: Molecular Function	haptoglobin binding	5.06E-04	5.05E-02	3.52E-01	2	3	"HBB,HBA1"
GO: Molecular Function	prenyltransferase activity	7.22E-04	6.17E-02	4.30E-01	3	14	"FDPS,CHML,FDFT1"
GO: Molecular Function	lipoprotein particle receptor activity	1.31E-03	9.80E-02	6.83E-01	3	17	"STAB2,LDLR,CD36"
GO: Molecular Function	farnesyltranstransferase activity	1.66E-03	1.10E-01	7.68E-01	2	5	"FDPS,FDFT1"
GO: Molecular Function	heat shock protein binding	2.37E-03	1.41E-01	9.86E-01	5	71	"SLC18A2,PTTG1,FGF1,DMPK,NOS2"
GO: Molecular Function	"oxidoreductase activity, acting on the CH-CH group of donors, NAD or NADP as acceptor"	3.22E-03	1.60E-01	1.00E+00	3	23	"MECR,PTGR1,DHCR24"
GO: Molecular Function	satellite DNA binding	3.42E-03	1.60E-01	1.00E+00	2	7	"HEY1,HEY2"
GO: Molecular Function	sulfur compound binding	5.19E-03	1.60E-01	1.00E+00	8	202	"FGF1,CCDC80,GSTM2,SEMA5A,HBEGF,ADAMTSL5,GAL3ST3,NELL1"
GO: Molecular Function	"oxidoreductase activity, acting on a sulfur group of donors"	5.40E-03	1.60E-01	1.00E+00	4	54	"PDIA5,MSRB2,STAB2,PCYOX1L"
GO: Molecular Function	"transferase activity, transferring alkyl or aryl (other than methyl) groups"	5.40E-03	1.60E-01	1.00E+00	4	54	"FDPS,CHML,FDFT1,GSTM2"
GO: Molecular Function	RNA polymerase II core promoter sequence-specific DNA binding transcription factor activity	7.15E-03	1.60E-01	1.00E+00	2	10	"HEY1,HEY2"
GO: Molecular Function	cAMP-dependent protein kinase regulator activity	7.15E-03	1.60E-01	1.00E+00	2	10	"RAPGEF4,NOS2"
GO: Molecular Function	oxidoreductase activity	7.61E-03	1.60E-01	1.00E+00	18	730	"PDIA5,FDFT1,MECR,PTGR1,MSRB2,CMAHP,DHCR24,AKR1B10,IMPDH1,SC5D,CYP4F3,STAB2,HBB,HBA1,LDHB,SQLE,PCYOX1L,NOS2"
GO: Molecular Function	diacylglycerol binding	8.66E-03	1.60E-01	1.00E+00	2	11	"CHPT1,RASGRP2"
GO: Molecular Function	cofactor binding	1.19E-02	1.60E-01	1.00E+00	9	281	"SIRT5,DHCR24,ALAS2,ACCS,BIRC5,LDHB,PYGM,SQLE,NOS2"
GO: Molecular Function	cargo receptor activity	1.21E-02	1.60E-01	1.00E+00	4	68	"MSR1,STAB2,LDLR,CD36"
GO: Molecular Function	metalloendopeptidase activity	1.23E-02	1.60E-01	1.00E+00	5	105	"ADAMTS16,ADAM12,ADAMTSL5,ADAMTS5,ADAMTSL2"
GO: Molecular Function	CMP-N-acetylneuraminate monooxygenase activity	1.31E-02	1.60E-01	1.00E+00	1	1	CMAHP
GO: Molecular Function	chondroitin sulfate proteoglycan binding	1.31E-02	1.60E-01	1.00E+00	1	1	SEMA5A
GO: Molecular Function	"oxidoreductase activity, acting on paired donors, with incorporation or reduction of molecular oxygen, with NAD(P)H as one donor, and the other dehydrogenated"	1.31E-02	1.60E-01	1.00E+00	1	1	SC5D
GO: Molecular Function	JUN kinase phosphatase activity	1.31E-02	1.60E-01	1.00E+00	1	1	DUSP19
GO: Molecular Function	2-alkenal reductase [NAD(P)] activity	1.31E-02	1.60E-01	1.00E+00	1	1	PTGR1
GO: Molecular Function	amidinotransferase activity	1.31E-02	1.60E-01	1.00E+00	1	1	GATM
GO: Molecular Function	phosphatidylcholine-sterol O-acyltransferase activity	1.31E-02	1.60E-01	1.00E+00	1	1	LCAT
GO: Molecular Function	lanosterol synthase activity	1.31E-02	1.60E-01	1.00E+00	1	1	LSS
GO: Molecular Function	protein-succinyllysine desuccinylase activity	1.31E-02	1.60E-01	1.00E+00	1	1	SIRT5
GO: Molecular Function	farnesyl-diphosphate farnesyltransferase activity	1.31E-02	1.60E-01	1.00E+00	1	1	FDFT1
GO: Molecular Function	deoxyribose-phosphate aldolase activity	1.31E-02	1.60E-01	1.00E+00	1	1	DERA
GO: Molecular Function	hydroxypyruvate isomerase activity	1.31E-02	1.60E-01	1.00E+00	1	1	HYI
GO: Molecular Function	1-aminocyclopropane-1-carboxylate synthase activity	1.31E-02	1.60E-01	1.00E+00	1	1	ACCS
GO: Molecular Function	cysteinyl leukotriene receptor activity	1.31E-02	1.60E-01	1.00E+00	1	1	CYSLTR2
GO: Molecular Function	"beta-galactoside alpha-2,3-sialyltransferase activity"	1.31E-02	1.60E-01	1.00E+00	1	1	ST3GAL6
GO: Molecular Function	hemoglobin beta binding	1.31E-02	1.60E-01	1.00E+00	1	1	HBB
GO: Molecular Function	methylmalonyl-CoA epimerase activity	1.31E-02	1.60E-01	1.00E+00	1	1	MCEE
GO: Molecular Function	lipoteichoic acid receptor activity	1.31E-02	1.60E-01	1.00E+00	1	1	CD36
GO: Molecular Function	lipoyl(octanoyl) transferase activity	1.31E-02	1.60E-01	1.00E+00	1	1	LIPT2
GO: Molecular Function	(N-acetylneuraminyl)-galactosylglucosylceramide N-acetylgalactosaminyltransferase activity	1.31E-02	1.60E-01	1.00E+00	1	1	B4GALNT1
GO: Molecular Function	squalene synthase activity	1.31E-02	1.60E-01	1.00E+00	1	1	FDFT1
GO: Molecular Function	glycine amidinotransferase activity	1.31E-02	1.60E-01	1.00E+00	1	1	GATM
GO: Molecular Function	oxidosqualene cyclase activity	1.31E-02	1.60E-01	1.00E+00	1	1	LSS
GO: Molecular Function	squalene monooxygenase activity	1.31E-02	1.60E-01	1.00E+00	1	1	SQLE
GO: Molecular Function	lathosterol oxidase activity	1.31E-02	1.60E-01	1.00E+00	1	1	SC5D
GO: Molecular Function	protein-malonyllysine demalonylase activity	1.31E-02	1.60E-01	1.00E+00	1	1	SIRT5
GO: Molecular Function	delta24-sterol reductase activity	1.31E-02	1.60E-01	1.00E+00	1	1	DHCR24
GO: Molecular Function	glycosaminoglycan binding	1.37E-02	1.61E-01	1.00E+00	7	193	"FGF1,CCDC80,STAB2,SEMA5A,HBEGF,ADAMTSL5,NELL1"
GO: Molecular Function	sulfate transmembrane transporter activity	1.40E-02	1.61E-01	1.00E+00	2	14	"SLC26A11,SLC26A10"
GO: Molecular Function	AMP binding	1.40E-02	1.61E-01	1.00E+00	2	14	"ACSS1,PYGM"
GO: Molecular Function	RNA polymerase II transcription regulatory region sequence-specific DNA binding transcription factor activity involved in negative regulation of transcription	1.43E-02	1.61E-01	1.00E+00	3	39	"KLF12,HEY1,NFIL3"
GO: Molecular Function	"oxidoreductase activity, acting on paired donors, with incorporation or reduction of molecular oxygen, NAD(P)H as one donor, and incorporation of one atom of oxygen"	1.53E-02	1.69E-01	1.00E+00	3	40	"CYP4F3,SQLE,NOS2"
GO: Molecular Function	apolipoprotein binding	1.60E-02	1.74E-01	1.00E+00	2	15	"MAPT,LCAT"
GO: Molecular Function	"oxidoreductase activity, acting on the CH-OH group of donors, NAD or NADP as acceptor"	1.82E-02	1.85E-01	1.00E+00	5	116	"PTGR1,DHCR24,AKR1B10,IMPDH1,LDHB"
GO: Molecular Function	core promoter sequence-specific DNA binding	2.48E-02	1.85E-01	1.00E+00	3	48	"ZNF277,SOX4,NFIL3"
GO: Molecular Function	intramolecular oxidoreductase activity	2.48E-02	1.85E-01	1.00E+00	3	48	"PDIA5,HYI,IDI1"
GO: Molecular Function	C-5 sterol desaturase activity	2.60E-02	1.85E-01	1.00E+00	1	2	SC5D
GO: Molecular Function	interleukin-27 receptor activity	2.60E-02	1.85E-01	1.00E+00	1	2	IL27RA
GO: Molecular Function	ADP-activated nucleotide receptor activity	2.60E-02	1.85E-01	1.00E+00	1	2	P2RY1
GO: Molecular Function	mechanically-gated ion channel activity	2.60E-02	1.85E-01	1.00E+00	1	2	PIEZO2
GO: Molecular Function	octanoyltransferase activity	2.60E-02	1.85E-01	1.00E+00	1	2	LIPT2
GO: Molecular Function	myosin phosphatase regulator activity	2.60E-02	1.85E-01	1.00E+00	1	2	DMPK
GO: Molecular Function	IMP dehydrogenase activity	2.60E-02	1.85E-01	1.00E+00	1	2	IMPDH1
GO: Molecular Function	13-prostaglandin reductase activity	2.60E-02	1.85E-01	1.00E+00	1	2	PTGR1
GO: Molecular Function	5-aminolevulinate synthase activity	2.60E-02	1.85E-01	1.00E+00	1	2	ALAS2
GO: Molecular Function	geranylgeranyl reductase activity	2.60E-02	1.85E-01	1.00E+00	1	2	AKR1B10
GO: Molecular Function	15-oxoprostaglandin 13-oxidase activity	2.60E-02	1.85E-01	1.00E+00	1	2	PTGR1
GO: Molecular Function	oleic acid binding	2.60E-02	1.85E-01	1.00E+00	1	2	CD36
GO: Molecular Function	A1 adenosine receptor binding	2.60E-02	1.85E-01	1.00E+00	1	2	P2RY1
GO: Molecular Function	prenylcysteine oxidase activity	2.60E-02	1.85E-01	1.00E+00	1	2	PCYOX1L
GO: Molecular Function	N-succinyltransferase activity	2.60E-02	1.85E-01	1.00E+00	1	2	ALAS2
GO: Molecular Function	ATPase inhibitor activity	2.60E-02	1.85E-01	1.00E+00	1	2	PLN
GO: Molecular Function	macrophage colony-stimulating factor receptor binding	2.60E-02	1.85E-01	1.00E+00	1	2	CSF1
GO: Molecular Function	5-formyltetrahydrofolate cyclo-ligase activity	2.60E-02	1.85E-01	1.00E+00	1	2	MTHFSD
GO: Molecular Function	"protein-glycine ligase activity, initiating"	2.60E-02	1.85E-01	1.00E+00	1	2	TTLL3
GO: Molecular Function	geranyltranstransferase activity	2.60E-02	1.85E-01	1.00E+00	1	2	FDPS
GO: Molecular Function	sterol desaturase activity	2.60E-02	1.85E-01	1.00E+00	1	2	SC5D
GO: Molecular Function	cGMP-dependent protein kinase activity	2.60E-02	1.85E-01	1.00E+00	1	2	PRKG1
GO: Molecular Function	isopentenyl-diphosphate delta-isomerase activity	2.60E-02	1.85E-01	1.00E+00	1	2	IDI1
GO: Molecular Function	parathyroid hormone receptor activity	2.60E-02	1.85E-01	1.00E+00	1	2	PTH1R
GO: Molecular Function	dimethylallyltranstransferase activity	2.60E-02	1.85E-01	1.00E+00	1	2	FDPS
GO: Molecular Function	mechanically gated channel activity	2.60E-02	1.85E-01	1.00E+00	1	2	PIEZO2
GO: Molecular Function	"oxidoreductase activity, acting on CH-OH group of donors"	2.73E-02	1.92E-01	1.00E+00	5	129	"PTGR1,DHCR24,AKR1B10,IMPDH1,LDHB"
GO: Molecular Function	sialyltransferase activity	2.77E-02	1.93E-01	1.00E+00	2	20	"ST3GAL6,ST8SIA4"
GO: Molecular Function	"transferase activity, transferring glycosyl groups"	2.81E-02	1.93E-01	1.00E+00	8	274	"GALNT14,SIRT5,ST3GAL6,B3GNTL1,B4GALNT1,ST8SIA4,COLGALT2,PYGM"
GO: Molecular Function	endopeptidase activity	3.06E-02	2.06E-01	1.00E+00	10	385	"USP11,ADAMTS16,ADAM12,PRSS48,KLK8,ADAMTSL5,DPP4,ADAMTS5,DDI1,ADAMTSL2"
GO: Molecular Function	metallopeptidase activity	3.19E-02	2.06E-01	1.00E+00	6	181	"ADAMTS16,ADAM12,ADAMTSL5,METAP1D,ADAMTS5,ADAMTSL2"
GO: Molecular Function	"oxidoreductase activity, acting on the CH-CH group of donors"	3.52E-02	2.06E-01	1.00E+00	3	55	"MECR,PTGR1,DHCR24"
GO: Molecular Function	fibronectin binding	3.60E-02	2.06E-01	1.00E+00	2	23	"CCDC80,IGFBP5"
GO: Molecular Function	pyridoxal phosphate binding	3.68E-02	2.06E-01	1.00E+00	3	56	"ALAS2,ACCS,PYGM"
GO: Molecular Function	guanyl-nucleotide exchange factor activity	3.74E-02	2.06E-01	1.00E+00	6	188	"TIAM1,PSD3,RASGRF2,ARHGEF25,RASGRP2,RAPGEF4"
GO: Molecular Function	ATP-activated nucleotide receptor activity	3.87E-02	2.06E-01	1.00E+00	1	3	P2RY1
GO: Molecular Function	indanol dehydrogenase activity	3.87E-02	2.06E-01	1.00E+00	1	3	AKR1B10
GO: Molecular Function	tocopherol omega-hydroxylase activity	3.87E-02	2.06E-01	1.00E+00	1	3	CYP4F3
GO: Molecular Function	RNA 7-methylguanosine cap binding	3.87E-02	2.06E-01	1.00E+00	1	3	DCPS
GO: Molecular Function	proteoglycan sulfotransferase activity	3.87E-02	2.06E-01	1.00E+00	1	3	GAL3ST3
GO: Molecular Function	serotonin transmembrane transporter activity	3.87E-02	2.06E-01	1.00E+00	1	3	SLC18A2
GO: Molecular Function	glycogen phosphorylase activity	3.87E-02	2.06E-01	1.00E+00	1	3	PYGM
GO: Molecular Function	procollagen galactosyltransferase activity	3.87E-02	2.06E-01	1.00E+00	1	3	COLGALT2
GO: Molecular Function	cyclo-ligase activity	3.87E-02	2.06E-01	1.00E+00	1	3	MTHFSD
GO: Molecular Function	trans-2-enoyl-CoA reductase (NADPH) activity	3.87E-02	2.06E-01	1.00E+00	1	3	MECR
GO: Molecular Function	"oxidoreductase activity, acting on paired donors, with incorporation or reduction of molecular oxygen, another compound as one donor, and incorporation of one atom of oxygen"	3.87E-02	2.06E-01	1.00E+00	1	3	CMAHP
GO: Molecular Function	acetate-CoA ligase activity	3.87E-02	2.06E-01	1.00E+00	1	3	ACSS1
GO: Molecular Function	apolipoprotein A-I binding	3.87E-02	2.06E-01	1.00E+00	1	3	LCAT
GO: Molecular Function	diacylglycerol cholinephosphotransferase activity	3.87E-02	2.06E-01	1.00E+00	1	3	CHPT1
GO: Molecular Function	calcitonin receptor binding	3.87E-02	2.06E-01	1.00E+00	1	3	CALCA
GO: Molecular Function	protein-glycine ligase activity	3.87E-02	2.06E-01	1.00E+00	1	3	TTLL3
GO: Molecular Function	hemoglobin alpha binding	3.87E-02	2.06E-01	1.00E+00	1	3	HBB
GO: Molecular Function	succinyltransferase activity	3.87E-02	2.06E-01	1.00E+00	1	3	ALAS2
GO: Molecular Function	alpha-tocopherol omega-hydroxylase activity	3.87E-02	2.06E-01	1.00E+00	1	3	CYP4F3
GO: Molecular Function	kinase regulator activity	3.89E-02	2.06E-01	1.00E+00	5	142	"PIK3R6,AFAP1L2,RAPGEF4,NOS2,DUSP19"
GO: Molecular Function	anion:anion antiporter activity	4.19E-02	2.18E-01	1.00E+00	2	25	"SLC26A11,SLC22A8"
GO: Molecular Function	heparin binding	4.19E-02	2.18E-01	1.00E+00	5	145	"FGF1,CCDC80,HBEGF,ADAMTSL5,NELL1"
GO: Molecular Function	monooxygenase activity	4.49E-02	2.28E-01	1.00E+00	4	102	"CMAHP,CYP4F3,SQLE,NOS2"
GO: Molecular Function	epidermal growth factor receptor binding	4.50E-02	2.28E-01	1.00E+00	2	26	"TGFA,HBEGF"
GO: Molecular Function	sulfur compound transmembrane transporter activity	4.50E-02	2.28E-01	1.00E+00	2	26	"SLC26A11,SLC26A10"
GO: Molecular Function	coenzyme binding	4.99E-02	2.31E-01	1.00E+00	6	202	"SIRT5,DHCR24,ALAS2,LDHB,SQLE,NOS2"
GO: Biological Process	alcohol biosynthetic process	6.54E-08	1.30E-04	1.11E-03	13	146	"FDPS,FDFT1,FGF1,PRKG1,P2RY1,DHCR24,CHPT1,SC5D,LSS,PTH1R,IDI1,SQLE,LCAT"
GO: Biological Process	cholesterol biosynthetic process	9.08E-08	1.30E-04	1.11E-03	8	44	"FDPS,FDFT1,FGF1,DHCR24,SC5D,LSS,IDI1,SQLE"
GO: Biological Process	sterol biosynthetic process	2.18E-07	2.08E-04	1.78E-03	8	49	"FDPS,FDFT1,FGF1,DHCR24,SC5D,LSS,IDI1,SQLE"
GO: Biological Process	organic hydroxy compound biosynthetic process	1.46E-06	1.04E-03	8.91E-03	13	191	"FDPS,FDFT1,FGF1,PRKG1,P2RY1,DHCR24,CHPT1,SC5D,LSS,PTH1R,IDI1,SQLE,LCAT"
GO: Biological Process	cholesterol metabolic process	5.06E-06	2.89E-03	2.47E-02	10	123	"FDPS,FDFT1,FGF1,DHCR24,SC5D,LSS,LDLR,IDI1,SQLE,LCAT"
GO: Biological Process	sterol metabolic process	1.24E-05	5.89E-03	5.03E-02	10	136	"FDPS,FDFT1,FGF1,DHCR24,SC5D,LSS,LDLR,IDI1,SQLE,LCAT"
GO: Biological Process	small molecule biosynthetic process	1.81E-05	7.38E-03	6.30E-02	19	477	"ACSS1,FDPS,FDFT1,FGF1,MECR,PTGR1,PRKG1,P2RY1,DHCR24,GATM,CHPT1,SC5D,LSS,MTHFSD,PTH1R,IDI1,SQLE,LCAT,LIPT2"
GO: Biological Process	alcohol metabolic process	3.17E-05	1.13E-02	9.66E-02	16	370	"ACSS1,FDPS,FDFT1,FGF1,PRKG1,P2RY1,DHCR24,AKR1B10,CHPT1,SC5D,LSS,PTH1R,LDLR,IDI1,SQLE,LCAT"
GO: Biological Process	lipid biosynthetic process	4.52E-05	1.44E-02	1.23E-01	21	601	"ACSS1,PIK3R6,FDPS,FDFT1,FGF1,MECR,PTGR1,B4GALNT1,PRKD1,PRKG1,DHCR24,CHPT1,ST8SIA4,SC5D,LSS,COLGALT2,LDLR,IDI1,SQLE,LCAT,LIPT2"
GO: Biological Process	umbilical cord development	1.71E-04	3.84E-02	3.27E-01	2	2	"HEY1,HEY2"
GO: Biological Process	umbilical cord morphogenesis	1.71E-04	3.84E-02	3.27E-01	2	2	"HEY1,HEY2"
GO: Biological Process	negative regulation of transcription from RNA polymerase II promoter involved in smooth muscle cell differentiation	1.71E-04	3.84E-02	3.27E-01	2	2	"HEY1,HEY2"
GO: Biological Process	negative regulation of Notch signaling pathway	1.74E-04	3.84E-02	3.27E-01	4	22	"DLK1,HEY1,HEY2,CHAC1"
GO: Biological Process	organic hydroxy compound metabolic process	2.23E-04	4.38E-02	3.74E-01	17	483	"ACSS1,FDPS,FDFT1,FGF1,PRKG1,P2RY1,DHCR24,AKR1B10,CHPT1,SC5D,LSS,PTH1R,LDHB,LDLR,IDI1,SQLE,LCAT"
GO: Biological Process	regulation of heart contraction	2.30E-04	4.38E-02	3.74E-01	9	157	"NEDD4L,DMPK,PRKG1,HEY2,CALCA,GSTM2,HBEGF,PLN,NOS2"
GO: Biological Process	steroid biosynthetic process	2.77E-04	4.92E-02	4.20E-01	9	161	"FDPS,FDFT1,FGF1,PRKG1,DHCR24,SC5D,LSS,IDI1,SQLE"
GO: Biological Process	relaxation of muscle	2.92E-04	4.92E-02	4.20E-01	4	25	"PRKG1,P2RY1,GSTM2,PLN"
GO: Biological Process	cGMP-mediated signaling	4.47E-04	6.92E-02	5.91E-01	3	12	"PRKG1,CD36,NOS2"
GO: Biological Process	ascending aorta development	5.08E-04	6.92E-02	5.91E-01	2	3	"HEY2,SOX4"
GO: Biological Process	farnesyl diphosphate metabolic process	5.08E-04	6.92E-02	5.91E-01	2	3	"FDPS,FDFT1"
GO: Biological Process	ascending aorta morphogenesis	5.08E-04	6.92E-02	5.91E-01	2	3	"HEY2,SOX4"
GO: Biological Process	regulation of inositol phosphate biosynthetic process	5.76E-04	7.26E-02	6.20E-01	3	13	"PRKG1,P2RY1,PTH1R"
GO: Biological Process	ventricular septum morphogenesis	6.02E-04	7.26E-02	6.20E-01	4	30	"HEY1,HEY2,SOX4,VANGL2"
GO: Biological Process	regulation of plasma lipoprotein particle levels	6.35E-04	7.26E-02	6.20E-01	5	53	"MSR1,PLA2G7,LDLR,CD36,LCAT"
GO: Biological Process	steroid metabolic process	6.61E-04	7.26E-02	6.20E-01	12	302	"FDPS,FDFT1,FGF1,PRKG1,DHCR24,AKR1B10,SC5D,LSS,LDLR,IDI1,SQLE,LCAT"
GO: Biological Process	regulation of muscle system process	6.78E-04	7.26E-02	6.20E-01	9	182	"NEDD4L,CHRM3,FDPS,DMPK,PRKG1,CALCA,GSTM2,PPP1R12B,PLN"
GO: Biological Process	regulation of muscle contraction	6.88E-04	7.26E-02	6.20E-01	8	146	"NEDD4L,CHRM3,DMPK,PRKG1,CALCA,GSTM2,PPP1R12B,PLN"
GO: Biological Process	heart contraction	7.33E-04	7.26E-02	6.20E-01	9	184	"NEDD4L,DMPK,PRKG1,HEY2,CALCA,GSTM2,HBEGF,PLN,NOS2"
GO: Biological Process	muscle system process	7.46E-04	7.26E-02	6.20E-01	13	350	"NEDD4L,CHRM3,FDPS,DMPK,PRKG1,P2RY1,HEY2,SCN7A,CALCA,GSTM2,PPP1R12B,PLN,TMOD4"
GO: Biological Process	heart process	7.61E-04	7.26E-02	6.20E-01	9	185	"NEDD4L,DMPK,PRKG1,HEY2,CALCA,GSTM2,HBEGF,PLN,NOS2"
GO: Biological Process	positive regulation of macrophage derived foam cell differentiation	8.98E-04	8.29E-02	7.08E-01	3	15	"MSR1,CD36,CSF1"
GO: Biological Process	endocardial cushion to mesenchymal transition involved in heart valve formation	1.01E-03	8.73E-02	7.45E-01	2	4	"HEY1,HEY2"
GO: Biological Process	muscular septum morphogenesis	1.01E-03	8.73E-02	7.45E-01	2	4	"HEY2,VANGL2"
GO: Biological Process	regulation of system process	1.20E-03	1.01E-01	8.59E-01	14	415	"NEDD4L,CHRM3,FDPS,DMPK,PRKG1,P2RY1,HEY2,KLK8,CALCA,GSTM2,PPP1R12B,HBEGF,PLN,NOS2"
GO: Biological Process	developmental growth	1.42E-03	1.14E-01	9.70E-01	12	330	"FDPS,FGF1,PRKG1,HEY2,GATM,MAPT,SEMA5A,HBEGF,IGFBP5,CSF1,VANGL2,GSN"
GO: Biological Process	single-organism biosynthetic process	1.47E-03	1.14E-01	9.70E-01	33	1461	"ACSS1,PIK3R6,FDPS,FDFT1,FGF1,MECR,ST3GAL6,PTGR1,B4GALNT1,PRKD1,PRKG1,P2RY1,HS3ST1,DHCR24,ALAS2,IMPDH1,GATM,CHPT1,ST8SIA4,SC5D,CALCA,LSS,GSTM2,MTHFSD,PTH1R,COLGALT2,C1QTNF2,LDLR,IDI1,SQLE,LCAT,NOS2,LIPT2"
GO: Biological Process	blood circulation	1.60E-03	1.14E-01	9.70E-01	14	428	"NCALD,NEDD4L,CHRM3,DMPK,PRKG1,P2RY1,HEY2,CALCA,GSTM2,HBB,HBEGF,COL4A3,PLN,NOS2"
GO: Biological Process	regulation of skeletal muscle contraction by calcium ion signaling	1.66E-03	1.14E-01	9.70E-01	2	5	"DMPK,GSTM2"
GO: Biological Process	endocardial cushion to mesenchymal transition	1.66E-03	1.14E-01	9.70E-01	2	5	"HEY1,HEY2"
GO: Biological Process	arterial endothelial cell differentiation	1.66E-03	1.14E-01	9.70E-01	2	5	"HEY1,HEY2"
GO: Biological Process	dorsal aorta morphogenesis	1.66E-03	1.14E-01	9.70E-01	2	5	"HEY1,HEY2"
GO: Biological Process	circulatory system process	1.67E-03	1.14E-01	9.70E-01	14	430	"NCALD,NEDD4L,CHRM3,DMPK,PRKG1,P2RY1,HEY2,CALCA,GSTM2,HBB,HBEGF,COL4A3,PLN,NOS2"
GO: Biological Process	cellular lipid metabolic process	2.14E-03	1.42E-01	1.00E+00	23	915	"ACSS1,PIK3R6,FDPS,FDFT1,MECR,ST3GAL6,PTGR1,B4GALNT1,PRKD1,PLA2G7,AKR1B10,MCEE,CHPT1,ST8SIA4,SC5D,CYP4F3,COLGALT2,C1QTNF2,LDLR,CD36,IDI1,LCAT,LIPT2"
GO: Biological Process	dorsal aorta development	2.48E-03	1.58E-01	1.00E+00	2	6	"HEY1,HEY2"
GO: Biological Process	inositol phosphate biosynthetic process	2.48E-03	1.58E-01	1.00E+00	3	21	"PRKG1,P2RY1,PTH1R"
GO: Biological Process	aorta morphogenesis	2.84E-03	1.77E-01	1.00E+00	3	22	"HEY1,HEY2,SOX4"
GO: Biological Process	ventricular septum development	3.04E-03	1.85E-01	1.00E+00	4	46	"HEY1,HEY2,SOX4,VANGL2"
GO: Biological Process	positive regulation of cholesterol storage	3.44E-03	1.97E-01	1.00E+00	2	7	"MSR1,CD36"
GO: Biological Process	response to stilbenoid	3.44E-03	1.97E-01	1.00E+00	2	7	"CD36,IDI1"
GO: Biological Process	positive regulation of cholesterol biosynthetic process	3.44E-03	1.97E-01	1.00E+00	2	7	"FDPS,FGF1"
GO: Biological Process	regulation of vasodilation	3.55E-03	1.99E-01	1.00E+00	4	48	"PRKG1,P2RY1,CALCA,NOS2"
GO: Biological Process	aorta development	3.66E-03	2.02E-01	1.00E+00	3	24	"HEY1,HEY2,SOX4"
GO: Biological Process	lipid metabolic process	3.94E-03	2.13E-01	1.00E+00	28	1253	"ACSS1,PIK3R6,FDPS,FDFT1,FGF1,MECR,ST3GAL6,PTGR1,B4GALNT1,PRKD1,PRKG1,PLA2G7,DHCR24,AKR1B10,MCEE,CHPT1,ST8SIA4,SC5D,LSS,CYP4F3,COLGALT2,C1QTNF2,LDLR,CD36,IDI1,SQLE,LCAT,LIPT2"
GO: Biological Process	second-messenger-mediated signaling	4.12E-03	2.13E-01	1.00E+00	8	194	"NCALD,DMPK,PRKG1,GSTM2,PLN,CD36,RAPGEF4,NOS2"
GO: Biological Process	cardiac septum morphogenesis	4.12E-03	2.13E-01	1.00E+00	4	50	"HEY1,HEY2,SOX4,VANGL2"
GO: Biological Process	positive regulation of cholesterol metabolic process	4.54E-03	2.13E-01	1.00E+00	2	8	"FDPS,FGF1"
GO: Biological Process	homologous chromosome segregation	4.54E-03	2.13E-01	1.00E+00	2	8	"PTTG1,MSH5"
GO: Biological Process	regulation of extracellular matrix disassembly	4.54E-03	2.13E-01	1.00E+00	2	8	"SEMA5A,DPP4"
GO: Biological Process	blood vessel endothelial cell differentiation	4.54E-03	2.13E-01	1.00E+00	2	8	"HEY1,HEY2"
GO: Biological Process	ganglioside biosynthetic process	4.54E-03	2.13E-01	1.00E+00	2	8	"B4GALNT1,ST8SIA4"
GO: Biological Process	positive regulation of endothelial cell chemotaxis	4.54E-03	2.13E-01	1.00E+00	2	8	"PRKD1,SEMA5A"
GO: Biological Process	negative regulation of ion transmembrane transporter activity	4.62E-03	2.13E-01	1.00E+00	3	26	"NEDD4L,GSTM2,PLN"
GO: Biological Process	regulation of Notch signaling pathway	4.75E-03	2.16E-01	1.00E+00	4	52	"DLK1,HEY1,HEY2,CHAC1"
GO: Biological Process	heart valve morphogenesis	5.14E-03	2.26E-01	1.00E+00	3	27	"HEY1,HEY2,SOX4"
GO: Biological Process	isoprenoid biosynthetic process	5.14E-03	2.26E-01	1.00E+00	3	27	"FDPS,FDFT1,IDI1"
GO: Biological Process	regulation of vasculature development	5.40E-03	2.27E-01	1.00E+00	8	203	"PIK3R6,FGF1,PRKD1,HEY1,HEY2,SEMA5A,CYSLTR2,COL4A3"
GO: Biological Process	oxidation-reduction process	5.47E-03	2.27E-01	1.00E+00	23	988	"ACSS1,CHRM3,PDIA5,FDFT1,MECR,PTGR1,MSRB2,PLA2G7,DHCR24,AKR1B10,IMPDH1,MCEE,SC5D,CYP4F3,STAB2,C1QTNF2,HBB,LDHB,PYGM,SQLE,PCYOX1L,RAPGEF4,NOS2"
GO: Biological Process	blood vessel morphogenesis	5.65E-03	2.27E-01	1.00E+00	14	493	"PIK3R6,FGF1,PRKD1,HEY1,HEY2,TGFA,MYO1E,STAB2,SEMA5A,HBEGF,CYSLTR2,COL4A3,SOX4,VANGL2"
GO: Biological Process	regulation of macrophage derived foam cell differentiation	5.71E-03	2.27E-01	1.00E+00	3	28	"MSR1,CD36,CSF1"
GO: Biological Process	pulmonary valve morphogenesis	5.79E-03	2.27E-01	1.00E+00	2	9	"HEY1,HEY2"
GO: Biological Process	regulation of short-term neuronal synaptic plasticity	5.79E-03	2.27E-01	1.00E+00	2	9	"SHISA9,SYP"
GO: Biological Process	regulation of skeletal muscle contraction	5.79E-03	2.27E-01	1.00E+00	2	9	"DMPK,GSTM2"
GO: Biological Process	pulmonary valve development	5.79E-03	2.27E-01	1.00E+00	2	9	"HEY1,HEY2"
GO: Biological Process	muscle contraction	5.94E-03	2.30E-01	1.00E+00	10	297	"NEDD4L,CHRM3,DMPK,PRKG1,SCN7A,CALCA,GSTM2,PPP1R12B,PLN,TMOD4"
GO: Biological Process	cyclic-nucleotide-mediated signaling	6.18E-03	2.36E-01	1.00E+00	4	56	"PRKG1,CD36,RAPGEF4,NOS2"
GO: Biological Process	heart valve development	6.30E-03	2.37E-01	1.00E+00	3	29	"HEY1,HEY2,SOX4"
GO: Biological Process	cardiac muscle tissue growth	6.58E-03	2.45E-01	1.00E+00	4	57	"FDPS,FGF1,PRKG1,HEY2"
GO: Biological Process	creatine metabolic process	7.17E-03	2.53E-01	1.00E+00	2	10	"CKB,GATM"
GO: Biological Process	positive regulation of inositol phosphate biosynthetic process	7.17E-03	2.53E-01	1.00E+00	2	10	"P2RY1,PTH1R"
GO: Biological Process	glomerular basement membrane development	7.17E-03	2.53E-01	1.00E+00	2	10	"MYO1E,COL4A3"
GO: Biological Process	ventricular trabecula myocardium morphogenesis	7.17E-03	2.53E-01	1.00E+00	2	10	"HEY1,HEY2"
GO: Biological Process	plasma lipoprotein particle clearance	7.61E-03	2.65E-01	1.00E+00	3	31	"MSR1,LDLR,CD36"
GO: Biological Process	foam cell differentiation	8.31E-03	2.76E-01	1.00E+00	3	32	"MSR1,CD36,CSF1"
GO: Biological Process	macrophage derived foam cell differentiation	8.31E-03	2.76E-01	1.00E+00	3	32	"MSR1,CD36,CSF1"
GO: Biological Process	positive regulation of vasodilation	8.31E-03	2.76E-01	1.00E+00	3	32	"PRKG1,CALCA,NOS2"
GO: Biological Process	receptor-mediated endocytosis	8.36E-03	2.76E-01	1.00E+00	7	175	"NEDD4L,SYNE1,MSR1,CALCA,STAB2,LDLR,CD36"
GO: Biological Process	regulation of endothelial cell chemotaxis	8.69E-03	2.76E-01	1.00E+00	2	11	"PRKD1,SEMA5A"
GO: Biological Process	Notch signaling involved in heart development	8.69E-03	2.76E-01	1.00E+00	2	11	"HEY1,HEY2"
GO: Biological Process	type B pancreatic cell proliferation	8.69E-03	2.76E-01	1.00E+00	2	11	"BIRC5,IGFBP5"
GO: Biological Process	negative regulation of transport	9.09E-03	2.76E-01	1.00E+00	11	366	"SLC18A2,NEDD4L,PRKD1,PRKG1,P2RY1,MAPT,CALCA,GSTM2,PLN,CD36,SOX4"
GO: Biological Process	negative regulation of transporter activity	9.84E-03	2.76E-01	1.00E+00	3	34	"NEDD4L,GSTM2,PLN"
GO: Biological Process	cellular carbohydrate metabolic process	9.86E-03	2.76E-01	1.00E+00	9	272	"PRKG1,P2RY1,PTH1R,COLGALT2,C1QTNF2,IGFBP5,LDHB,GAL3ST3,PYGM"
GO: Biological Process	heart growth	9.87E-03	2.76E-01	1.00E+00	4	64	"FDPS,FGF1,PRKG1,HEY2"
GO: Biological Process	positive regulation of macrophage differentiation	1.03E-02	2.76E-01	1.00E+00	2	12	"CALCA,CSF1"
GO: Biological Process	negative regulation of neurological system process	1.03E-02	2.76E-01	1.00E+00	2	12	"KLK8,CALCA"
GO: Biological Process	regulation of vasculogenesis	1.03E-02	2.76E-01	1.00E+00	2	12	"HEY1,HEY2"
GO: Biological Process	negative regulation of transcription regulatory region DNA binding	1.03E-02	2.76E-01	1.00E+00	2	12	"HEY1,HEY2"
GO: Biological Process	response to phenylpropanoid	1.03E-02	2.76E-01	1.00E+00	2	12	"CD36,IDI1"
GO: Biological Process	muscle cell differentiation	1.04E-02	2.76E-01	1.00E+00	10	323	"FDPS,SYNE1,DMPK,HEY1,ADAM12,PRKG1,HEY2,BIN1,IGFBP5,VANGL2"
GO: Biological Process	cholesterol transport	1.04E-02	2.76E-01	1.00E+00	4	65	"MSR1,LDLR,CD36,LCAT"
GO: Biological Process	sterol transport	1.04E-02	2.76E-01	1.00E+00	4	65	"MSR1,LDLR,CD36,LCAT"
GO: Biological Process	morphogenesis of an epithelial sheet	1.07E-02	2.76E-01	1.00E+00	3	35	"PLET1,HBEGF,VANGL2"
GO: Biological Process	positive regulation of angiogenesis	1.10E-02	2.76E-01	1.00E+00	5	102	"PIK3R6,FGF1,PRKD1,SEMA5A,CYSLTR2"
GO: Biological Process	vasculature development	1.12E-02	2.76E-01	1.00E+00	15	590	"PIK3R6,FGF1,PRKD1,HEY1,HEY2,TGFA,MYO1E,CALCA,STAB2,SEMA5A,HBEGF,CYSLTR2,COL4A3,SOX4,VANGL2"
GO: Biological Process	coronary vasculature development	1.15E-02	2.76E-01	1.00E+00	3	36	"FGF1,HEY2,VANGL2"
GO: Biological Process	"wound healing, spreading of epidermal cells"	1.21E-02	2.76E-01	1.00E+00	2	13	"PLET1,HBEGF"
GO: Biological Process	positive regulation of protein depolymerization	1.21E-02	2.76E-01	1.00E+00	2	13	"SEMA5A,STMN2"
GO: Biological Process	atrioventricular valve development	1.21E-02	2.76E-01	1.00E+00	2	13	"HEY1,HEY2"
GO: Biological Process	regulation of cholesterol biosynthetic process	1.21E-02	2.76E-01	1.00E+00	2	13	"FDPS,FGF1"
GO: Biological Process	regulation of cholesterol storage	1.21E-02	2.76E-01	1.00E+00	2	13	"MSR1,CD36"
GO: Biological Process	cardiac septum development	1.22E-02	2.76E-01	1.00E+00	4	68	"HEY1,HEY2,SOX4,VANGL2"
GO: Biological Process	negative regulation of intracellular transport	1.24E-02	2.76E-01	1.00E+00	5	105	"MAPT,CALCA,PLN,CD36,SOX4"
GO: Biological Process	negative regulation of sodium ion transmembrane transport	1.31E-02	2.76E-01	1.00E+00	1	1	NEDD4L
GO: Biological Process	negative regulation of calcium-transporting ATPase activity	1.31E-02	2.76E-01	1.00E+00	1	1	PLN
GO: Biological Process	peptidyl-lysine desuccinylation	1.31E-02	2.76E-01	1.00E+00	1	1	SIRT5
GO: Biological Process	regulation of skeletal muscle contraction by neural stimulation via neuromuscular junction	1.31E-02	2.76E-01	1.00E+00	1	1	DMPK
GO: Biological Process	L-methylmalonyl-CoA metabolic process	1.31E-02	2.76E-01	1.00E+00	1	1	MCEE
GO: Biological Process	blood microparticle formation	1.31E-02	2.76E-01	1.00E+00	1	1	CD36
GO: Biological Process	regulation of excitatory postsynaptic membrane potential involved in skeletal muscle contraction	1.31E-02	2.76E-01	1.00E+00	1	1	DMPK
GO: Biological Process	cholesterol biosynthetic process via lathosterol	1.31E-02	2.76E-01	1.00E+00	1	1	SC5D
GO: Biological Process	regulation of the force of heart contraction by cardiac conduction	1.31E-02	2.76E-01	1.00E+00	1	1	PLN
GO: Biological Process	negative regulation of cardiac vascular smooth muscle cell differentiation	1.31E-02	2.76E-01	1.00E+00	1	1	HEY2
GO: Biological Process	peptidyl-lysine demalonylation	1.31E-02	2.76E-01	1.00E+00	1	1	SIRT5
GO: Biological Process	protein desuccinylation	1.31E-02	2.76E-01	1.00E+00	1	1	SIRT5
GO: Biological Process	regulation of N-terminal peptidyl-lysine acetylation	1.31E-02	2.76E-01	1.00E+00	1	1	SOX4
GO: Biological Process	calcium ion import into sarcoplasmic reticulum	1.31E-02	2.76E-01	1.00E+00	1	1	PLN
GO: Biological Process	regulation of calcium ion import into sarcoplasmic reticulum	1.31E-02	2.76E-01	1.00E+00	1	1	PLN
GO: Biological Process	regulation of blood microparticle formation	1.31E-02	2.76E-01	1.00E+00	1	1	CD36
GO: Biological Process	positive regulation of N-terminal peptidyl-lysine acetylation	1.31E-02	2.76E-01	1.00E+00	1	1	SOX4
GO: Biological Process	regulation of elastin biosynthetic process	1.31E-02	2.76E-01	1.00E+00	1	1	HBEGF
GO: Biological Process	positive regulation of blood microparticle formation	1.31E-02	2.76E-01	1.00E+00	1	1	CD36
GO: Biological Process	protein demalonylation	1.31E-02	2.76E-01	1.00E+00	1	1	SIRT5
GO: Biological Process	negative regulation of elastin biosynthetic process	1.31E-02	2.76E-01	1.00E+00	1	1	HBEGF
GO: Biological Process	negative regulation of calcium ion import into sarcoplasmic reticulum	1.31E-02	2.76E-01	1.00E+00	1	1	PLN
GO: Biological Process	mammary gland fat development	1.31E-02	2.76E-01	1.00E+00	1	1	CSF1
GO: Biological Process	meiotic prophase II	1.31E-02	2.76E-01	1.00E+00	1	1	MSH5
GO: Biological Process	regulation of blood vessel size	1.34E-02	2.80E-01	1.00E+00	6	148	"CHRM3,PRKG1,P2RY1,CALCA,HBB,NOS2"
GO: Biological Process	regulation of tube size	1.38E-02	2.80E-01	1.00E+00	6	149	"CHRM3,PRKG1,P2RY1,CALCA,HBB,NOS2"
GO: Biological Process	cholesterol storage	1.40E-02	2.80E-01	1.00E+00	2	14	"MSR1,CD36"
GO: Biological Process	cardiac vascular smooth muscle cell differentiation	1.40E-02	2.80E-01	1.00E+00	2	14	"HEY2,VANGL2"
GO: Biological Process	heart valve formation	1.40E-02	2.80E-01	1.00E+00	2	14	"HEY1,HEY2"
GO: Biological Process	negative regulation of smooth muscle cell migration	1.40E-02	2.80E-01	1.00E+00	2	14	"PRKG1,IGFBP5"
GO: Biological Process	relaxation of cardiac muscle	1.40E-02	2.80E-01	1.00E+00	2	14	"GSTM2,PLN"
GO: Biological Process	polyol biosynthetic process	1.43E-02	2.85E-01	1.00E+00	3	39	"PRKG1,P2RY1,PTH1R"
GO: Biological Process	phospholipase C-activating G-protein coupled receptor signaling pathway	1.47E-02	2.91E-01	1.00E+00	4	72	"CHRM3,P2RY1,CALCA,PTH1R"
GO: Biological Process	positive regulation of cell migration	1.54E-02	3.02E-01	1.00E+00	9	293	"FGF1,PLET1,PRKD1,PLA2G7,SEMA5A,HBEGF,LAMB1,CSF1,RAPGEF4"
GO: Biological Process	blood vessel development	1.60E-02	3.04E-01	1.00E+00	14	560	"PIK3R6,FGF1,PRKD1,HEY1,HEY2,TGFA,MYO1E,STAB2,SEMA5A,HBEGF,CYSLTR2,COL4A3,SOX4,VANGL2"
GO: Biological Process	physiological cardiac muscle hypertrophy	1.60E-02	3.04E-01	1.00E+00	2	15	"FDPS,PRKG1"
GO: Biological Process	physiological muscle hypertrophy	1.60E-02	3.04E-01	1.00E+00	2	15	"FDPS,PRKG1"
GO: Biological Process	heart trabecula formation	1.60E-02	3.04E-01	1.00E+00	2	15	"HEY1,HEY2"
GO: Biological Process	cell growth involved in cardiac muscle cell development	1.60E-02	3.04E-01	1.00E+00	2	15	"FDPS,PRKG1"
GO: Biological Process	vasodilation	1.62E-02	3.04E-01	1.00E+00	4	74	"PRKG1,P2RY1,CALCA,NOS2"
GO: Biological Process	positive regulation of cell motility	1.70E-02	3.10E-01	1.00E+00	9	298	"FGF1,PLET1,PRKD1,PLA2G7,SEMA5A,HBEGF,LAMB1,CSF1,RAPGEF4"
GO: Biological Process	insulin secretion	1.77E-02	3.10E-01	1.00E+00	7	203	"SLC18A2,CHRM3,BLK,BIRC5,SOX4,RAPGEF4,NOS2"
GO: Biological Process	angiogenesis	1.81E-02	3.10E-01	1.00E+00	11	405	"PIK3R6,FGF1,PRKD1,HEY1,TGFA,STAB2,SEMA5A,HBEGF,CYSLTR2,COL4A3,VANGL2"
GO: Biological Process	ganglioside metabolic process	1.82E-02	3.10E-01	1.00E+00	2	16	"B4GALNT1,ST8SIA4"
GO: Biological Process	negative regulation of ion transmembrane transport	1.82E-02	3.10E-01	1.00E+00	2	16	"NEDD4L,PLN"
GO: Biological Process	short-chain fatty acid metabolic process	1.82E-02	3.10E-01	1.00E+00	2	16	"ACSS1,MCEE"
GO: Biological Process	endothelial cell chemotaxis	1.82E-02	3.10E-01	1.00E+00	2	16	"PRKD1,SEMA5A"
GO: Biological Process	negative regulation of smooth muscle contraction	1.82E-02	3.10E-01	1.00E+00	2	16	"PRKG1,CALCA"
GO: Biological Process	lipoprotein transport	1.82E-02	3.10E-01	1.00E+00	2	16	"MSR1,CD36"
GO: Biological Process	regulation of cardiac muscle contraction by regulation of the release of sequestered calcium ion	1.82E-02	3.10E-01	1.00E+00	2	16	"GSTM2,PLN"
GO: Biological Process	atrial septum morphogenesis	1.82E-02	3.10E-01	1.00E+00	2	16	"HEY2,SOX4"
GO: Biological Process	oligosaccharide metabolic process	1.98E-02	3.10E-01	1.00E+00	3	44	"ST3GAL6,ST8SIA4,GAL3ST3"
GO: Biological Process	positive regulation of cellular component movement	1.98E-02	3.10E-01	1.00E+00	9	306	"FGF1,PLET1,PRKD1,PLA2G7,SEMA5A,HBEGF,LAMB1,CSF1,RAPGEF4"
GO: Biological Process	regulation of striated muscle contraction	2.01E-02	3.10E-01	1.00E+00	4	79	"NEDD4L,DMPK,GSTM2,PLN"
GO: Biological Process	isoprenoid metabolic process	2.02E-02	3.10E-01	1.00E+00	5	119	"FDPS,FDFT1,AKR1B10,LDLR,IDI1"
GO: Biological Process	epiboly	2.04E-02	3.10E-01	1.00E+00	2	17	"PLET1,HBEGF"
GO: Biological Process	"wound healing, spreading of cells"	2.04E-02	3.10E-01	1.00E+00	2	17	"PLET1,HBEGF"
GO: Biological Process	negative regulation of calcium ion transmembrane transporter activity	2.04E-02	3.10E-01	1.00E+00	2	17	"GSTM2,PLN"
GO: Biological Process	epiboly involved in wound healing	2.04E-02	3.10E-01	1.00E+00	2	17	"PLET1,HBEGF"
GO: Biological Process	regulation of cardiac muscle contraction by calcium ion signaling	2.04E-02	3.10E-01	1.00E+00	2	17	"GSTM2,PLN"
GO: Biological Process	cardiac right ventricle morphogenesis	2.04E-02	3.10E-01	1.00E+00	2	17	"HEY2,SOX4"
GO: Biological Process	chromosome segregation	2.06E-02	3.10E-01	1.00E+00	6	163	"PTTG1,MSH5,NUF2,BIRC5,SPICE1,SPC25"
GO: Biological Process	regulation of carbohydrate biosynthetic process	2.09E-02	3.10E-01	1.00E+00	4	80	"PRKG1,P2RY1,PTH1R,C1QTNF2"
GO: Biological Process	positive regulation of locomotion	2.10E-02	3.10E-01	1.00E+00	9	309	"FGF1,PLET1,PRKD1,PLA2G7,SEMA5A,HBEGF,LAMB1,CSF1,RAPGEF4"
GO: Biological Process	regulation of smooth muscle cell migration	2.10E-02	3.10E-01	1.00E+00	3	45	"PRKG1,IGFBP5,RAPGEF4"
GO: Biological Process	chemical homeostasis	2.16E-02	3.10E-01	1.00E+00	19	875	"SLC18A2,NEDD4L,DMPK,PRKG1,P2RY1,CKB,ALAS2,SCN7A,CALCA,GSTM2,PTH1R,BIRC5,IGFBP5,SLC22A17,PLN,LDLR,PYGM,SOX4,LCAT"
GO: Biological Process	striated muscle hypertrophy	2.23E-02	3.10E-01	1.00E+00	3	46	"FDPS,PRKG1,HEY2"
GO: Biological Process	cardiac muscle hypertrophy	2.23E-02	3.10E-01	1.00E+00	3	46	"FDPS,PRKG1,HEY2"
GO: Biological Process	cellular chemical homeostasis	2.27E-02	3.10E-01	1.00E+00	14	586	"NEDD4L,DMPK,PRKG1,P2RY1,CKB,ALAS2,CALCA,GSTM2,PTH1R,BIRC5,SLC22A17,PLN,PYGM,SOX4"
GO: Biological Process	negative regulation of ion transport	2.27E-02	3.10E-01	1.00E+00	4	82	"NEDD4L,PRKG1,CALCA,PLN"
GO: Biological Process	glycosphingolipid biosynthetic process	2.28E-02	3.10E-01	1.00E+00	2	18	"B4GALNT1,ST8SIA4"
GO: Biological Process	negative regulation of transmembrane transport	2.28E-02	3.10E-01	1.00E+00	2	18	"NEDD4L,PLN"
GO: Biological Process	negative regulation of systemic arterial blood pressure	2.28E-02	3.10E-01	1.00E+00	2	18	"NEDD4L,CALCA"
GO: Biological Process	low-density lipoprotein particle clearance	2.28E-02	3.10E-01	1.00E+00	2	18	"LDLR,CD36"
GO: Biological Process	positive regulation of lipid storage	2.28E-02	3.10E-01	1.00E+00	2	18	"MSR1,CD36"
GO: Biological Process	regulation of cell adhesion	2.34E-02	3.10E-01	1.00E+00	9	315	"PLET1,PRKG1,CCDC80,DPP4,CD36,LAMB1,CSF1,GSN,SERPINI1"
GO: Biological Process	peptide transport	2.38E-02	3.10E-01	1.00E+00	8	265	"SLC18A2,CHRM3,SLC22A8,BLK,BIRC5,SOX4,RAPGEF4,NOS2"
GO: Biological Process	lipid modification	2.41E-02	3.10E-01	1.00E+00	6	169	"PIK3R6,B4GALNT1,PLA2G7,MCEE,C1QTNF2,LCAT"
GO: Biological Process	negative regulation of blood pressure	2.49E-02	3.10E-01	1.00E+00	3	48	"NEDD4L,CALCA,NOS2"
GO: Biological Process	muscle hypertrophy	2.49E-02	3.10E-01	1.00E+00	3	48	"FDPS,PRKG1,HEY2"
GO: Biological Process	positive regulation of protein complex disassembly	2.52E-02	3.10E-01	1.00E+00	2	19	"SEMA5A,STMN2"
GO: Biological Process	sialylation	2.52E-02	3.10E-01	1.00E+00	2	19	"ST3GAL6,ST8SIA4"
GO: Biological Process	atrial septum development	2.52E-02	3.10E-01	1.00E+00	2	19	"HEY2,SOX4"
GO: Biological Process	positive regulation of microtubule polymerization or depolymerization	2.52E-02	3.10E-01	1.00E+00	2	19	"MAPT,STMN2"
GO: Biological Process	osteoblast development	2.52E-02	3.10E-01	1.00E+00	2	19	"HEY1,PTH1R"
GO: Biological Process	vascular process in circulatory system	2.53E-02	3.10E-01	1.00E+00	6	171	"CHRM3,PRKG1,P2RY1,CALCA,HBB,NOS2"
GO: Biological Process	acetate biosynthetic process	2.60E-02	3.10E-01	1.00E+00	1	2	ACSS1
GO: Biological Process	interleukin-27-mediated signaling pathway	2.60E-02	3.10E-01	1.00E+00	1	2	IL27RA
GO: Biological Process	prenylcysteine metabolic process	2.60E-02	3.10E-01	1.00E+00	1	2	PCYOX1L
GO: Biological Process	planar dichotomous subdivision of terminal units involved in lung branching morphogenesis	2.60E-02	3.10E-01	1.00E+00	1	2	VANGL2
GO: Biological Process	lateral sprouting involved in lung morphogenesis	2.60E-02	3.10E-01	1.00E+00	1	2	VANGL2
GO: Biological Process	regulation of opioid receptor signaling pathway	2.60E-02	3.10E-01	1.00E+00	1	2	SYP
GO: Biological Process	vasodilation of artery involved in baroreceptor response to increased systemic arterial blood pressure	2.60E-02	3.10E-01	1.00E+00	1	2	CALCA
GO: Biological Process	negative regulation of inositol phosphate biosynthetic process	2.60E-02	3.10E-01	1.00E+00	1	2	PRKG1
GO: Biological Process	synaptic vesicle membrane organization	2.60E-02	3.10E-01	1.00E+00	1	2	SYP
GO: Biological Process	orthogonal dichotomous subdivision of terminal units involved in lung branching morphogenesis	2.60E-02	3.10E-01	1.00E+00	1	2	VANGL2
GO: Biological Process	negative regulation of calcium ion binding	2.60E-02	3.10E-01	1.00E+00	1	2	PLN
GO: Biological Process	positive regulation of extracellular matrix disassembly	2.60E-02	3.10E-01	1.00E+00	1	2	SEMA5A
GO: Biological Process	cellular response to menadione	2.60E-02	3.10E-01	1.00E+00	1	2	DCPS
GO: Biological Process	regulation of cardiac vascular smooth muscle cell differentiation	2.60E-02	3.10E-01	1.00E+00	1	2	HEY2
GO: Biological Process	dimethylallyl diphosphate metabolic process	2.60E-02	3.10E-01	1.00E+00	1	2	IDI1
GO: Biological Process	prenylcysteine catabolic process	2.60E-02	3.10E-01	1.00E+00	1	2	PCYOX1L
GO: Biological Process	regulation of high-density lipoprotein particle assembly	2.60E-02	3.10E-01	1.00E+00	1	2	LCAT
GO: Biological Process	negative regulation of transcription initiation from RNA polymerase II promoter	2.60E-02	3.10E-01	1.00E+00	1	2	HEY2
GO: Biological Process	farnesol metabolic process	2.60E-02	3.10E-01	1.00E+00	1	2	AKR1B10
GO: Biological Process	regulation of calcium ion binding	2.60E-02	3.10E-01	1.00E+00	1	2	PLN
GO: Biological Process	"antigen processing and presentation of endogenous peptide antigen via MHC class I via ER pathway, TAP-dependent"	2.60E-02	3.10E-01	1.00E+00	1	2	HLA-A
GO: Biological Process	creatine biosynthetic process	2.60E-02	3.10E-01	1.00E+00	1	2	GATM
GO: Biological Process	antigen processing and presentation of endogenous peptide antigen via MHC class I via ER pathway	2.60E-02	3.10E-01	1.00E+00	1	2	HLA-A
GO: Biological Process	elastin biosynthetic process	2.60E-02	3.10E-01	1.00E+00	1	2	HBEGF
GO: Biological Process	dimethylallyl diphosphate biosynthetic process	2.60E-02	3.10E-01	1.00E+00	1	2	IDI1
GO: Biological Process	positive regulation of caveolin-mediated endocytosis	2.60E-02	3.10E-01	1.00E+00	1	2	NEDD4L
GO: Biological Process	acetyl-CoA biosynthetic process from acetate	2.60E-02	3.10E-01	1.00E+00	1	2	ACSS1
GO: Biological Process	establishment of body hair or bristle planar orientation	2.60E-02	3.10E-01	1.00E+00	1	2	VANGL2
GO: Biological Process	neuronal-glial interaction involved in cerebral cortex radial glia guided migration	2.60E-02	3.10E-01	1.00E+00	1	2	LAMB1
GO: Biological Process	positive regulation of odontogenesis of dentin-containing tooth	2.60E-02	3.10E-01	1.00E+00	1	2	CSF1
GO: Biological Process	FasL biosynthetic process	2.60E-02	3.10E-01	1.00E+00	1	2	PHLDA1
GO: Biological Process	lipoate biosynthetic process	2.60E-02	3.10E-01	1.00E+00	1	2	LIPT2
GO: Biological Process	sesquiterpenoid catabolic process	2.60E-02	3.10E-01	1.00E+00	1	2	AKR1B10
GO: Biological Process	farnesyl diphosphate biosynthetic process	2.60E-02	3.10E-01	1.00E+00	1	2	FDPS
GO: Biological Process	farnesol catabolic process	2.60E-02	3.10E-01	1.00E+00	1	2	AKR1B10
GO: Biological Process	low-density lipoprotein particle mediated signaling	2.60E-02	3.10E-01	1.00E+00	1	2	CD36
GO: Biological Process	lipoprotein particle mediated signaling	2.60E-02	3.10E-01	1.00E+00	1	2	CD36
GO: Biological Process	geranyl diphosphate biosynthetic process	2.60E-02	3.10E-01	1.00E+00	1	2	FDPS
GO: Biological Process	establishment of body hair planar orientation	2.60E-02	3.10E-01	1.00E+00	1	2	VANGL2
GO: Biological Process	regulation of caveolin-mediated endocytosis	2.60E-02	3.10E-01	1.00E+00	1	2	NEDD4L
GO: Biological Process	propionate biosynthetic process	2.60E-02	3.10E-01	1.00E+00	1	2	ACSS1
GO: Biological Process	geranyl diphosphate metabolic process	2.60E-02	3.10E-01	1.00E+00	1	2	FDPS
GO: Biological Process	positive regulation of cellular carbohydrate metabolic process	2.63E-02	3.12E-01	1.00E+00	3	49	"P2RY1,PTH1R,C1QTNF2"
GO: Biological Process	regulation of insulin secretion	2.72E-02	3.22E-01	1.00E+00	6	174	"CHRM3,BLK,BIRC5,SOX4,RAPGEF4,NOS2"
GO: Biological Process	vasculogenesis	2.74E-02	3.22E-01	1.00E+00	4	87	"FGF1,HEY1,HEY2,MYO1E"
GO: Biological Process	smooth muscle cell migration	2.77E-02	3.22E-01	1.00E+00	3	50	"PRKG1,IGFBP5,RAPGEF4"
GO: Biological Process	regulation of macrophage differentiation	2.78E-02	3.22E-01	1.00E+00	2	20	"CALCA,CSF1"
GO: Biological Process	nitric oxide mediated signal transduction	2.78E-02	3.22E-01	1.00E+00	2	20	"CD36,NOS2"
GO: Biological Process	primary alcohol metabolic process	2.78E-02	3.22E-01	1.00E+00	2	20	"ACSS1,AKR1B10"
GO: Biological Process	regulation of cellular component movement	2.80E-02	3.22E-01	1.00E+00	14	603	"NEDD4L,FGF1,PLET1,PRKD1,PRKG1,PLA2G7,MAPT,SEMA5A,HBEGF,IGFBP5,PLN,LAMB1,CSF1,RAPGEF4"
GO: Biological Process	cellular ion homeostasis	2.80E-02	3.22E-01	1.00E+00	12	489	"NEDD4L,DMPK,PRKG1,P2RY1,CKB,ALAS2,CALCA,GSTM2,PTH1R,SLC22A17,PLN,PYGM"
GO: Biological Process	negative regulation of binding	2.85E-02	3.26E-01	1.00E+00	4	88	"HEY1,P2RY1,HEY2,PLN"
GO: Biological Process	artery morphogenesis	2.91E-02	3.31E-01	1.00E+00	3	51	"HEY1,HEY2,SOX4"
GO: Biological Process	muscle structure development	2.96E-02	3.31E-01	1.00E+00	13	550	"FDPS,SYNE1,DMPK,HEY1,ADAM12,PRKG1,CNTFR,HEY2,METTL8,BIN1,HBEGF,IGFBP5,VANGL2"
GO: Biological Process	amide transport	2.99E-02	3.31E-01	1.00E+00	8	277	"SLC18A2,CHRM3,SLC22A8,BLK,BIRC5,SOX4,RAPGEF4,NOS2"
GO: Biological Process	regulation of leukocyte mediated immunity	3.00E-02	3.31E-01	1.00E+00	5	132	"PRAM1,HLA-A,IL27RA,DPP4,NOS2"
GO: Biological Process	cardiac muscle tissue development	3.00E-02	3.31E-01	1.00E+00	6	178	"FDPS,FGF1,HEY1,PRKG1,HEY2,PLN"
GO: Biological Process	positive regulation of cation channel activity	3.05E-02	3.31E-01	1.00E+00	2	21	"NEDD4L,GSTM2"
GO: Biological Process	positive regulation of epidermal growth factor receptor signaling pathway	3.05E-02	3.31E-01	1.00E+00	2	21	"AFAP1L2,TGFA"
GO: Biological Process	regulation of transcription regulatory region DNA binding	3.05E-02	3.31E-01	1.00E+00	2	21	"HEY1,HEY2"
GO: Biological Process	labyrinthine layer blood vessel development	3.05E-02	3.31E-01	1.00E+00	2	21	"HEY1,HEY2"
GO: Biological Process	cardiac epithelial to mesenchymal transition	3.05E-02	3.31E-01	1.00E+00	2	21	"HEY1,HEY2"
GO: Biological Process	vascular smooth muscle cell differentiation	3.05E-02	3.31E-01	1.00E+00	2	21	"HEY2,VANGL2"
GO: Biological Process	regulation of cholesterol metabolic process	3.05E-02	3.31E-01	1.00E+00	2	21	"FDPS,FGF1"
GO: Biological Process	N-terminal protein amino acid modification	3.05E-02	3.31E-01	1.00E+00	2	21	"SOX4,METAP1D"
GO: Biological Process	regulation of ossification	3.07E-02	3.33E-01	1.00E+00	6	179	"PRKD1,HEY1,CALCA,IGFBP5,NELL1,CSF1"
GO: Biological Process	establishment of organelle localization	3.15E-02	3.36E-01	1.00E+00	7	229	"SLC18A2,SYNE1,MAPT,LRMP,BIRC5,SYP,SPICE1"
GO: Biological Process	smooth muscle cell differentiation	3.22E-02	3.36E-01	1.00E+00	3	53	"HEY1,HEY2,VANGL2"
GO: Biological Process	response to transition metal nanoparticle	3.28E-02	3.36E-01	1.00E+00	4	92	"SLC18A2,GATM,PLN,LCAT"
GO: Biological Process	negative regulation of heart contraction	3.32E-02	3.36E-01	1.00E+00	2	22	"PRKG1,PLN"
GO: Biological Process	positive regulation of steroid biosynthetic process	3.32E-02	3.36E-01	1.00E+00	2	22	"FDPS,FGF1"
GO: Biological Process	regulation of release of sequestered calcium ion into cytosol by sarcoplasmic reticulum	3.32E-02	3.36E-01	1.00E+00	2	22	"GSTM2,PLN"
GO: Biological Process	positive regulation of interleukin-8 production	3.32E-02	3.36E-01	1.00E+00	2	22	"AFAP1L2,CALCA"
GO: Biological Process	positive regulation of ERBB signaling pathway	3.32E-02	3.36E-01	1.00E+00	2	22	"AFAP1L2,TGFA"
GO: Biological Process	regulation of cellular carbohydrate metabolic process	3.35E-02	3.36E-01	1.00E+00	5	136	"PRKG1,P2RY1,PTH1R,C1QTNF2,IGFBP5"
GO: Biological Process	cellular metal ion homeostasis	3.35E-02	3.36E-01	1.00E+00	11	446	"NEDD4L,DMPK,PRKG1,P2RY1,ALAS2,CALCA,GSTM2,PTH1R,SLC22A17,PLN,PYGM"
GO: Biological Process	regulation of cation channel activity	3.37E-02	3.36E-01	1.00E+00	3	54	"NEDD4L,GSTM2,PLN"
GO: Biological Process	positive regulation of endocytosis	3.39E-02	3.36E-01	1.00E+00	4	93	"NEDD4L,SYNE1,BIN1,CD36"
GO: Biological Process	metal ion homeostasis	3.51E-02	3.36E-01	1.00E+00	12	506	"NEDD4L,DMPK,PRKG1,P2RY1,ALAS2,SCN7A,CALCA,GSTM2,PTH1R,SLC22A17,PLN,PYGM"
GO: Biological Process	defense response to bacterium	3.52E-02	3.36E-01	1.00E+00	6	185	"HLA-A,IL27RA,STAB2,CD36,ADAMTS5,NOS2"
GO: Biological Process	regulation of angiogenesis	3.52E-02	3.36E-01	1.00E+00	6	185	"PIK3R6,FGF1,PRKD1,SEMA5A,CYSLTR2,COL4A3"
GO: Biological Process	positive regulation of axonogenesis	3.54E-02	3.36E-01	1.00E+00	3	55	"TIAM1,MAPT,SEMA5A"
GO: Biological Process	peptide hormone secretion	3.55E-02	3.36E-01	1.00E+00	7	235	"SLC18A2,CHRM3,BLK,BIRC5,SOX4,RAPGEF4,NOS2"
GO: Biological Process	cellular homeostasis	3.57E-02	3.36E-01	1.00E+00	15	683	"NEDD4L,PDIA5,DMPK,PRKG1,P2RY1,CKB,ALAS2,CALCA,GSTM2,PTH1R,BIRC5,SLC22A17,PLN,PYGM,SOX4"
GO: Biological Process	macromolecular complex remodeling	3.61E-02	3.36E-01	1.00E+00	2	23	"PLA2G7,LCAT"
GO: Biological Process	plasma lipoprotein particle remodeling	3.61E-02	3.36E-01	1.00E+00	2	23	"PLA2G7,LCAT"
GO: Biological Process	regulation of ryanodine-sensitive calcium-release channel activity	3.61E-02	3.36E-01	1.00E+00	2	23	"GSTM2,PLN"
GO: Biological Process	establishment of chromosome localization	3.61E-02	3.36E-01	1.00E+00	2	23	"BIRC5,SPICE1"
GO: Biological Process	negative regulation of muscle contraction	3.61E-02	3.36E-01	1.00E+00	2	23	"PRKG1,CALCA"
GO: Biological Process	protein-lipid complex remodeling	3.61E-02	3.36E-01	1.00E+00	2	23	"PLA2G7,LCAT"
GO: Biological Process	hormone secretion	3.64E-02	3.36E-01	1.00E+00	8	288	"SLC18A2,CHRM3,BLK,P2RY1,BIRC5,SOX4,RAPGEF4,NOS2"
GO: Biological Process	positive regulation of carbohydrate metabolic process	3.70E-02	3.36E-01	1.00E+00	3	56	"P2RY1,PTH1R,C1QTNF2"
GO: Biological Process	regulation of smooth muscle contraction	3.70E-02	3.36E-01	1.00E+00	3	56	"CHRM3,PRKG1,CALCA"
GO: Biological Process	glomerulus development	3.70E-02	3.36E-01	1.00E+00	3	56	"MYO1E,COL4A3,VANGL2"
GO: Biological Process	lipid storage	3.70E-02	3.36E-01	1.00E+00	3	56	"B4GALNT1,MSR1,CD36"
GO: Biological Process	positive regulation of multicellular organismal process	3.71E-02	3.36E-01	1.00E+00	14	627	"CHRM3,FDPS,FGF1,PRKG1,AFAP1L2,P2RY1,HEY2,IL27RA,CALCA,NELL1,CD36,CSF1,NOS2,IL36G"
GO: Biological Process	regulation of hormone secretion	3.76E-02	3.36E-01	1.00E+00	7	238	"CHRM3,BLK,P2RY1,BIRC5,SOX4,RAPGEF4,NOS2"
GO: Biological Process	regulation of carbohydrate metabolic process	3.82E-02	3.36E-01	1.00E+00	5	141	"PRKG1,P2RY1,PTH1R,C1QTNF2,IGFBP5"
GO: Biological Process	cellular polysaccharide metabolic process	3.87E-02	3.36E-01	1.00E+00	4	97	"COLGALT2,C1QTNF2,GAL3ST3,PYGM"
GO: Biological Process	adrenergic receptor signaling pathway involved in heart process	3.88E-02	3.36E-01	1.00E+00	1	3	PLN
GO: Biological Process	positive regulation of histone deacetylase activity	3.88E-02	3.36E-01	1.00E+00	1	3	PRKD1
GO: Biological Process	regulation of cyclin catabolic process	3.88E-02	3.36E-01	1.00E+00	1	3	NELL1
GO: Biological Process	convergent extension involved in neural plate elongation	3.88E-02	3.36E-01	1.00E+00	1	3	VANGL2
GO: Biological Process	cellular response to low-density lipoprotein particle stimulus	3.88E-02	3.36E-01	1.00E+00	1	3	CD36
GO: Biological Process	negative regulation of transcription by transcription factor localization	3.88E-02	3.36E-01	1.00E+00	1	3	HEY2
GO: Biological Process	atrioventricular valve formation	3.88E-02	3.36E-01	1.00E+00	1	3	HEY1
GO: Biological Process	negative regulation of extracellular matrix disassembly	3.88E-02	3.36E-01	1.00E+00	1	3	DPP4
GO: Biological Process	cellular detoxification of nitrogen compound	3.88E-02	3.36E-01	1.00E+00	1	3	GSTM2
GO: Biological Process	dichotomous subdivision of terminal units involved in lung branching	3.88E-02	3.36E-01	1.00E+00	1	3	VANGL2
GO: Biological Process	propionate metabolic process	3.88E-02	3.36E-01	1.00E+00	1	3	ACSS1
GO: Biological Process	iron chelate transport	3.88E-02	3.36E-01	1.00E+00	1	3	SLC22A17
GO: Biological Process	nuclear matrix anchoring at nuclear membrane	3.88E-02	3.36E-01	1.00E+00	1	3	SYNE1
GO: Biological Process	glutathione transport	3.88E-02	3.36E-01	1.00E+00	1	3	SLC22A8
GO: Biological Process	protection from natural killer cell mediated cytotoxicity	3.88E-02	3.36E-01	1.00E+00	1	3	HLA-A
GO: Biological Process	"negative regulation of DNA-templated transcription, initiation"	3.88E-02	3.36E-01	1.00E+00	1	3	HEY2
GO: Biological Process	neural plate elongation	3.88E-02	3.36E-01	1.00E+00	1	3	VANGL2
GO: Biological Process	epicardial cell to mesenchymal cell transition	3.88E-02	3.36E-01	1.00E+00	1	3	VANGL2
GO: Biological Process	protein polyglycylation	3.88E-02	3.36E-01	1.00E+00	1	3	TTLL3
GO: Biological Process	siderophore transport	3.88E-02	3.36E-01	1.00E+00	1	3	SLC22A17
GO: Biological Process	negative regulation of cyclin catabolic process	3.88E-02	3.36E-01	1.00E+00	1	3	NELL1
GO: Biological Process	nitric oxide transport	3.88E-02	3.36E-01	1.00E+00	1	3	HBB
GO: Biological Process	regulation of phosphatidylcholine catabolic process	3.88E-02	3.36E-01	1.00E+00	1	3	LDLR
GO: Biological Process	tripeptide transport	3.88E-02	3.36E-01	1.00E+00	1	3	SLC22A8
GO: Biological Process	G-protein coupled purinergic nucleotide receptor signaling pathway	3.88E-02	3.36E-01	1.00E+00	1	3	P2RY1
GO: Biological Process	sesquiterpenoid metabolic process	3.88E-02	3.36E-01	1.00E+00	1	3	AKR1B10
GO: Biological Process	regulation of calcium-transporting ATPase activity	3.88E-02	3.36E-01	1.00E+00	1	3	PLN
GO: Biological Process	poly-N-acetyllactosamine metabolic process	3.88E-02	3.36E-01	1.00E+00	1	3	GAL3ST3
GO: Biological Process	synaptic vesicle amine transport	3.88E-02	3.36E-01	1.00E+00	1	3	SLC18A2
GO: Biological Process	regulation of testosterone biosynthetic process	3.88E-02	3.36E-01	1.00E+00	1	3	PRKG1
GO: Biological Process	negative regulation of sodium ion transmembrane transporter activity	3.88E-02	3.36E-01	1.00E+00	1	3	NEDD4L
GO: Biological Process	lipoate metabolic process	3.88E-02	3.36E-01	1.00E+00	1	3	LIPT2
GO: Biological Process	chromosome localization	3.90E-02	3.36E-01	1.00E+00	2	24	"BIRC5,SPICE1"
GO: Biological Process	heart trabecula morphogenesis	3.90E-02	3.36E-01	1.00E+00	2	24	"HEY1,HEY2"
GO: Biological Process	regulation of microtubule polymerization	3.90E-02	3.36E-01	1.00E+00	2	24	"MAPT,STMN2"
GO: Biological Process	fatty acid biosynthetic process	3.91E-02	3.36E-01	1.00E+00	5	142	"ACSS1,MECR,PTGR1,SC5D,LIPT2"
GO: Biological Process	terpenoid metabolic process	3.99E-02	3.42E-01	1.00E+00	4	98	"FDPS,FDFT1,AKR1B10,LDLR"
GO: Biological Process	hormone transport	4.03E-02	3.43E-01	1.00E+00	8	294	"SLC18A2,CHRM3,BLK,P2RY1,BIRC5,SOX4,RAPGEF4,NOS2"
GO: Biological Process	artery development	4.04E-02	3.43E-01	1.00E+00	3	58	"HEY1,HEY2,SOX4"
GO: Biological Process	muscle cell migration	4.04E-02	3.43E-01	1.00E+00	3	58	"PRKG1,IGFBP5,RAPGEF4"
GO: Biological Process	trabecula formation	4.21E-02	3.52E-01	1.00E+00	2	25	"HEY1,HEY2"
GO: Biological Process	release of sequestered calcium ion into cytosol by sarcoplasmic reticulum	4.21E-02	3.52E-01	1.00E+00	2	25	"GSTM2,PLN"
GO: Biological Process	cell surface receptor signaling pathway involved in heart development	4.21E-02	3.52E-01	1.00E+00	2	25	"HEY1,HEY2"
GO: Biological Process	peptide secretion	4.21E-02	3.52E-01	1.00E+00	7	244	"SLC18A2,CHRM3,BLK,BIRC5,SOX4,RAPGEF4,NOS2"
GO: Biological Process	cardiac muscle cell development	4.22E-02	3.52E-01	1.00E+00	3	59	"FDPS,PRKG1,HEY2"
GO: Biological Process	outflow tract morphogenesis	4.22E-02	3.52E-01	1.00E+00	3	59	"HEY1,HEY2,VANGL2"
GO: Biological Process	regulation of neuron projection development	4.23E-02	3.52E-01	1.00E+00	8	297	"TIAM1,SYNE1,PRKD1,MAPT,KLK8,SEMA5A,STMN2,RAPGEF4"
GO: Biological Process	regulation of peptide hormone secretion	4.28E-02	3.55E-01	1.00E+00	6	194	"CHRM3,BLK,BIRC5,SOX4,RAPGEF4,NOS2"
GO: Biological Process	positive regulation of osteoblast differentiation	4.40E-02	3.63E-01	1.00E+00	3	60	"PRKD1,HEY1,NELL1"
GO: Biological Process	positive regulation of developmental growth	4.40E-02	3.63E-01	1.00E+00	3	60	"FDPS,MAPT,SEMA5A"
GO: Biological Process	positive regulation of epithelial cell proliferation	4.43E-02	3.64E-01	1.00E+00	5	147	"FGF1,PRKD1,TGFA,SEMA5A,LAMB1"
GO: Biological Process	cardiovascular system development	4.48E-02	3.67E-01	1.00E+00	18	889	"PIK3R6,FDPS,FGF1,PRKD1,HEY1,PRKG1,HEY2,TGFA,MYO1E,CALCA,STAB2,SEMA5A,HBEGF,CYSLTR2,COL4A3,PLN,SOX4,VANGL2"
GO: Biological Process	circulatory system development	4.48E-02	3.67E-01	1.00E+00	18	889	"PIK3R6,FDPS,FGF1,PRKD1,HEY1,PRKG1,HEY2,TGFA,MYO1E,CALCA,STAB2,SEMA5A,HBEGF,CYSLTR2,COL4A3,PLN,SOX4,VANGL2"
GO: Biological Process	coronary vasculature morphogenesis	4.52E-02	3.68E-01	1.00E+00	2	26	"FGF1,HEY2"
GO: Biological Process	positive regulation of lipid biosynthetic process	4.58E-02	3.70E-01	1.00E+00	3	61	"FDPS,FGF1,LDLR"
GO: Biological Process	regulation of steroid biosynthetic process	4.58E-02	3.70E-01	1.00E+00	3	61	"FDPS,FGF1,PRKG1"
GO: Biological Process	regulation of transport	4.63E-02	3.70E-01	1.00E+00	26	1404	"SLC18A2,NEDD4L,DAPK1,CHRM3,SYNE1,KCNJ5,DMPK,PRAM1,PRKD1,BLK,PRKG1,P2RY1,BIN1,SCN7A,MAPT,CALCA,GSTM2,SEMA5A,C1QTNF2,BIRC5,PLN,CD36,SOX4,NUP210,RAPGEF4,NOS2"
GO: Biological Process	regulation of peptide secretion	4.83E-02	3.70E-01	1.00E+00	6	200	"CHRM3,BLK,BIRC5,SOX4,RAPGEF4,NOS2"
GO: Biological Process	skeletal muscle contraction	4.84E-02	3.70E-01	1.00E+00	2	27	"DMPK,GSTM2"
GO: Biological Process	cardiac ventricle development	4.93E-02	3.70E-01	1.00E+00	4	105	"HEY1,HEY2,SOX4,VANGL2"
GO: Biological Process	cellular cation homeostasis	4.95E-02	3.70E-01	1.00E+00	11	476	"NEDD4L,DMPK,PRKG1,P2RY1,ALAS2,CALCA,GSTM2,PTH1R,SLC22A17,PLN,PYGM"
GO: Biological Process	cardiac cell development	4.96E-02	3.70E-01	1.00E+00	3	63	"FDPS,PRKG1,HEY2"
