# Supplementary material for: Pathogenic pathways are activated in each major cell type of the glomerulus in the Cd2ap mutant mouse model of focal segmental glomerulosclerosis
Source: BMC Nephrol. 2015 May 13;16:71. doi: 10.1186/s12882-015-0063-z (PMC4430919; doi:10.1186/s12882-015-0063-z)
Supplement: Additional file 3: Table S3. — RNA-seq defined genes upregulated in Cd2ap mutant mesangial cells. Fold change > 2.0. Columns show gene symbol, fold change, Gene ID, RPKM in mutant, RPKM in wild type and gene position as determined by chromosome, start and end. [file 12882_2015_63_MOESM3_ESM.xls]

Gene symbol	Fold Change	Gene description	RNA-seq P <0.05	FC in RNA-seq	Transcripts Cluster Id	
Glb1l2	6.8698163	"galactosidase, beta 1-like 2"	yes	11	10591884	
Steap4	5.2590356	STEAP family member 4	yes	22	10519497	
Gm10808	5.1945763	predicted gene 10808			10435961	
Tmem182	4.1135435	transmembrane protein 182	yes	6	10345869	
AI314831	3.9375052				10485643	
Postn	3.8982987	"periostin, osteoblast specific factor"	yes	7	10492021	
Serpinb1a	3.727741	"serine (or cysteine) peptidase inhibitor, clade B, member 1a"	yes	5	10408557	
Zmat4	3.7190826	"zinc finger, matrin type 4"	yes	14	10570963	
Tspan15	3.4209018	tetraspanin 15	yes	4	10369531	
Hesx1	3.3099978	homeobox gene expressed in ES cells	yes	107	10413393	
Mrc1	3.2739224	"mannose receptor, C type 1"	yes	5	10469358	
Ccdc80	3.171368	coiled-coil domain containing 80	yes	5	10435948	
Robo2	3.0478806	roundabout homolog 2 (Drosophila)	yes	7	10440344	
Nkain2	2.9918575	Na+/K+ transporting ATPase interacting 2	yes	10	10368585	
Ano1	2.9447098	"anoctamin 1, calcium activated chloride channel"	yes	4	10569618	
Ptprb	2.9343328	"protein tyrosine phosphatase, receptor type, B"	yes	2	10366476	
	2.8975527				10437580	
Pdgfc	2.7583346	"platelet-derived growth factor, C polypeptide"	yes	4	10492689	
Pcp4l1	2.7243092	Purkinje cell protein 4-like 1	yes	4	10360053	
2210409E12Rik|Gm10367	2.6630702	"transcription elongation factor B (SIII), polypeptide 2 pseudogene | predicted gene 10367"			10380250	
Zfp804a	2.4308043	zinc finger protein 804A	yes	5	10473244	
Lrrc17	2.4224184	leucine rich repeat containing 17	yes	3	10519998	
Pdgfd	2.4223626	"platelet-derived growth factor, D polypeptide"	yes	3	10583021	
Ceacam1	2.4059439	carcinoembryonic antigen-related cell adhesion molecule 1	yes	2	10561008	
Abat	2.3956153	4-aminobutyrate aminotransferase	yes	4	10433445	
Mylk4	2.3944778	"myosin light chain kinase family, member 4"	yes	2	10408543	
Ncf2	2.3718839	neutrophil cytosolic factor 2	yes	3	10412123	
Zfp759	2.3665113	zinc finger protein 759	No	1.45	10405911	
Mmp16	2.3502781	matrix metallopeptidase 16	yes	3	10503448	
Ppfia2	2.3394597	"protein tyrosine phosphatase, receptor type, f polypeptide (PTPRF), interacting protein (liprin), alpha 2"	yes	3	10366196	
Blmh	2.318413	bleomycin hydrolase	yes	3	10378802	
Pon3	2.2783158	paraoxonase 3	yes	3	10542993	
Top2a	2.2651105	topoisomerase (DNA) II alpha	yes	5	10390707	
Mir29c|A330023F24Rik	2.2619638	microRNA 29c | RIKEN cDNA A330023F24 gene			10352918	
Trpc4	2.2586465	"transient receptor potential cation channel, subfamily C, member 4"	yes	3	10492006	
Tek	2.2382696	endothelial-specific receptor tyrosine kinase	yes	2	10505954	
Entpd1	2.2086143	ectonucleoside triphosphate diphosphohydrolase 1	yes	2	10463070	
Snord14e	2.1813793	"small nucleolar RNA, C/D box 14E"	No		10584580	
Abcc9	2.126441	"ATP-binding cassette, sub-family C (CFTR/MRP), member 9"	yes	3	10549108	
Tec	2.1170406	tec protein tyrosine kinase	yes	1.9	10530536	
Kcnrg	2.1149855	potassium channel regulator	yes	3	10415787	
Slc7a8	2.1143804	"solute carrier family 7 (cationic amino acid transporter, y+ system), member 8"	yes	1.8	10419854	
Fgfr2	2.1132462	fibroblast growth factor receptor 2	yes	4	10568436	
Cdc14a	2.1030545	CDC14 cell division cycle 14 homolog A (S. cerevisiae)	yes	1.8	10501629	
Stmn1	2.1012962	stathmin 1	yes	3	10513818	
Serpini1	2.086859	"serine (or cysteine) peptidase inhibitor, clade I, member 1"	yes	3	10492628	
4930562F07Rik	2.0849879	RIKEN cDNA 4930562F07 gene			10359303	
Ccbl2	2.0763898	cysteine conjugate-beta lyase 2	yes	4	10496605	
Rasgef1a	2.0682485	"RasGEF domain family, member 1A"	yes	3	10541114	
Id2	2.049301	inhibitor of DNA binding 2	yes	2.5	10399691	
Gpd2	2.0402136	"glycerol phosphate dehydrogenase 2, mitochondrial"	yes	3	10472162	
Cd34	2.0378826	CD34 antigen	yes	3	10352905	
As3mt	2.0345662	arsenic (+3 oxidation state) methyltransferase	yes	1.7	10463704	
Dzip3	2.0209885	"DAZ interacting protein 3, zinc finger"	No		10439798	
Ehd4	2.013955	EH-domain containing 4	yes	3	10486396	
Smc2	2.0130565	structural maintenance of chromosomes 2	yes	2	10504957	
1810011O10Rik	2.005174	RIKEN cDNA 1810011O10 gene			10577641	
Npas2	2.0035427	neuronal PAS domain protein 2	yes	3	10345675	
Trpc6	1.9924988	"transient receptor potential cation channel, subfamily C, member 6"	yes	3	10583163	
Ndufa4l2	1.9893831	"NADH dehydrogenase (ubiquinone) 1 alpha subcomplex, 4-like 2"	yes	4	10366951	
Gdf10	1.9869883	growth differentiation factor 10	yes	4	10414025	
Cdk14	1.9782668	cyclin-dependent kinase 14	yes	1.7	10527940	
Ehd3	1.9760166	EH-domain containing 3	yes	3	10446777	
Gm10708	1.9757274	predicted gene 10708			10590842	
Itga4	1.9735347	integrin alpha 4	yes	2	10473125	
Add3	1.9670813	adducin 3 (gamma)	yes	3	10463911	
Gm15698	1.9650415	"transcription elongation factor B (SIII), polypeptide 2 pseudogene"			10389732	
H2-Q1	1.9592226	"histocompatibility 2, Q region locus 1"	yes	39	10444788	
Efnb2	1.9526432	ephrin B2	yes	3	10576911	
Fam111a	1.9510124	"family with sequence similarity 111, member A"	yes	1.12	10461723	
Sema5a	1.950975	"sema domain, seven thrombospondin repeats (type 1 and type 1-like), transmembrane domain (TM) and short cytoplasmic domain, (semaphorin) 5A"	yes	2	10423520	
Hist2h2be	1.9502602	"histone cluster 2, H2be"	yes	2	10494388	
Rnf213	1.9480015	ring finger protein 213	yes	1.25	10383198	
Hist1h2bl|Gm11277|Gm13646|Hist1h2bk|Hist1h2bm|Hist1h2bj|Hist1h2bn|Hist1h2bf|Hist1h2bh|Hist1h2bc	1.9425397	"histone cluster 1, H2bl | predicted gene 11277 | predicted gene 13646 | histone cluster 1, H2bk | histone cluster 1, H2bm | histone cluster 1, H2bj | histone cluster 1, H2bn | histone cluster 1, H2bf | histone cluster 1, H2bh | histone cluster 1, H2bc"	yes	1.7	10408070	
Cd200	1.9306719	CD200 antigen	yes	2	10439651	
Tet1	1.9204704	tet oncogene 1	yes	2	10369690	
Angptl2	1.9141164	angiopoietin-like 2	yes	2	10471555	
Art3	1.9133579	ADP-ribosyltransferase 3	yes	2	10523231	
Akr1b7	1.9087411	"aldo-keto reductase family 1, member B7"	yes	3	10537169	
Plxdc2	1.9085846	plexin domain containing 2	yes	2	10469457	
Gm5458|Gm5797|Gm3149|Gm6337	1.9044775	predicted gene 5458 | predicted gene 5797 | predicted gene 3149 | predicted gene 6337			10417458	
Kctd1	1.9024919	potassium channel tetramerisation domain containing 1	yes	1.9	10457606	
Lactb2	1.900288	"lactamase, beta 2"	yes	1.8	10353181	
Syne1	1.8989757	synaptic nuclear envelope 1	yes	3	10361509	
Pth1r	1.8888606	parathyroid hormone 1 receptor	yes	4	10597239	
Hddc3	1.8881453	HD domain containing 3	yes	1.7	10554463	
Ucp2	1.8879493	"uncoupling protein 2 (mitochondrial, proton carrier)"	yes	4	10555389	
Hist1h2bf|Hist1h2bc|Hist1h2bl|Hist1h2bk|Hist1h2bh|Hist1h2bn|Hist1h2bm|Hist1h2bj|Gm13646	1.8771989	"histone cluster 1, H2bf | histone cluster 1, H2bc | histone cluster 1, H2bl | histone cluster 1, H2bk | histone cluster 1, H2bh | histone cluster 1, H2bn | histone cluster 1, H2bm | histone cluster 1, H2bj | predicted gene 13646"	yes	1.9	10408210	
Gstk1	1.8747313	glutathione S-transferase kappa 1	yes	2	10537712	
Zfp60	1.8734944	zinc finger protein 60	yes	1.5	10551410	
Hist1h2bk|Gm11277|Gm13646|Hist1h2bl|Hist1h2bj|Hist1h2bn|Hist1h2bm|Hist1h2bh|Hist1h2bf|Hist1h2bc	1.8734932	"histone cluster 1, H2bk | predicted gene 11277 | predicted gene 13646 | histone cluster 1, H2bl | histone cluster 1, H2bj | histone cluster 1, H2bn | histone cluster 1, H2bm | histone cluster 1, H2bh | histone cluster 1, H2bf | histone cluster 1, H2bc"	yes	1.8	10403978	
Klf12	1.8660796	Kruppel-like factor 12	yes	1.6	10422013	
AI504432	1.8631053				10495186	
Chpt1	1.855998	choline phosphotransferase 1	yes	1.74	10371616	
Hist1h2bn|Hist1h2bk|Hist1h2be|Hist1h2bg|Hist1h2bl|Hist1h2bh|Hist1h2bj|Hist1h2bf|Hist1h2bm|Hist1h2bp	1.8536026	"histone cluster 1, H2bn | histone cluster 1, H2bk | histone cluster 1, H2be | histone cluster 1, H2bg | histone cluster 1, H2bl | histone cluster 1, H2bh | histone cluster 1, H2bj | histone cluster 1, H2bf | histone cluster 1, H2bm | histone cluster 1, H2bp"	yes	1.5	10403948	
Mboat1	1.8503404	membrane bound O-acyltransferase domain containing 1	yes	3	10404359	
Sdpr	1.8422948	serum deprivation response	yes	1.8	10346164	
Ckb	1.8402251	"creatine kinase, brain"	yes	3	10402708	
Npy1r	1.8341949	neuropeptide Y receptor Y1	yes	2	10572070	
Cdkl5	1.83231	cyclin-dependent kinase-like 5	yes	2	10607619	
Gsta4	1.8298858	"glutathione S-transferase, alpha 4"	yes	2	10587315	
Pard6g	1.8290868	par-6 partitioning defective 6 homolog gamma (C. elegans)	yes	3	10456988	
Ccnd2	1.82336	cyclin D2	yes	3	10548105	
Lphn3	1.8232735	latrophilin 3	yes	2	10522749	
Cpne2	1.8214418	copine II	yes	3	10574166	
Pts	1.8213245	6-pyruvoyl-tetrahydropterin synthase	yes	1.9	10593325	
D3Ertd751e	1.8209167	"DNA segment, Chr 3, ERATO Doi 751, expressed"	yes	3	10491877	
2210409E12Rik|Gm10367	1.8111687	"transcription elongation factor B (SIII), polypeptide 2 pseudogene | predicted gene 10367"			10389736	
Hint3	1.806356	histidine triad nucleotide binding protein 3	No		10368527	
Xrcc5	1.7974937	X-ray repair complementing defective repair in Chinese hamster cells 5	yes	2	10347232	
Mlh3	1.7934698	mutL homolog 3 (E coli)	yes	2	10401616	
Rmi1|LOC665550	1.7811465	"RMI1, RecQ mediated genome instability 1, homolog (S. cerevisiae) | RecQ mediated genome instability 1 pseudogene"	yes	2	10608422	
Slc9a3r2	1.7796061	"solute carrier family 9 (sodium/hydrogen exchanger), member 3 regulator 2"	yes	3	10448676	
Fv1	1.7791296	Friend virus susceptibility 1	yes	1.6	10510254	
Fam65b	1.7727361	"family with sequence similarity 65, member B"	yes	3	10404152	
5730419I09Rik	1.7674465	RIKEN cDNA 5730419I09 gene			10549171	
Mettl4	1.7665153	methyltransferase like 4	yes	2	10453544	
Etnk1	1.764829	ethanolamine kinase 1	yes	2	10542677	
4930523C07Rik|4930562F07Rik	1.7646899	RIKEN cDNA 4930523C07 gene | RIKEN cDNA 4930562F07 gene			10350977	
Ache	1.7629232	acetylcholinesterase	yes	3	10526559	
Myo6	1.7610716	myosin VI	yes	1.4	10587446	
Gas6	1.7573472	growth arrest specific 6	yes	1.4	10577164	
Poglut1	1.7526758	protein O-glucosyltransferase 1	yes	1.5	10439471	
Akr1e1	1.750972	"aldo-keto reductase family 1, member E1"	yes	1.5	10407467	
Nsg1	1.7503148	neuron specific gene family member 1	yes	1.9	10529656	
Epha3	1.7497432	Eph receptor A3	yes	1.9	10440258	
Rab6b	1.749668	"RAB6B, member RAS oncogene family"	yes	3	10588283	
Hspa12a	1.748168	heat shock protein 12A	yes	3	10468746	
	1.7441732				10598023	
Rpgrip1l	1.7440095	Rpgrip1-like	yes	1.6	10580550	
Ldhb	1.7391666	lactate dehydrogenase B	yes	1.7	10462035	
Smarca1	1.7381984	"SWI/SNF related, matrix associated, actin dependent regulator of chromatin, subfamily a, member 1"	yes?	1.3	10604347	
Hist1h2bj|Gm11277|Gm13646|Hist1h2bk|Hist1h2bc|Hist1h2bl|Hist1h2bm|Hist1h2bn	1.7364342	"histone cluster 1, H2bj | predicted gene 11277 | predicted gene 13646 | histone cluster 1, H2bk | histone cluster 1, H2bc | histone cluster 1, H2bl | histone cluster 1, H2bm | histone cluster 1, H2bn"	yes	1.8	10403980	
Tspan12	1.735336	tetraspanin 12	yes	1.9	10543306	
Pygm	1.7329835	muscle glycogen phosphorylase	yes	3	10460947	
Stxbp4	1.7284259	syntaxin binding protein 4	yes	1.4	10389795	
Spa17	1.7218279	sperm autoantigenic protein 17	No		10592336	
Hspa1a|Hspa1b	1.7209882	heat shock protein 1A | heat shock protein 1B	yes	1.9	10444589	
Fdft1	1.7186159	farnesyl diphosphate farnesyl transferase 1	yes	2	10412909	
Apoo|Apoo-ps	1.7177327	"apolipoprotein O | apolipoprotein O, pseudogene"	yes	1.3	10412036	
Dgkb	1.7145083	"diacylglycerol kinase, beta"	yes	2	10395428	
Trim32	1.7133915	tripartite motif-containing 32	yes	1.3	10505512	
Eif4e	1.7125362	eukaryotic translation initiation factor 4E	No		10496485	
Prepl|Slc3a1	1.7093711	"prolyl endopeptidase-like | solute carrier family 3, member 1"	No		10453373	
Kbtbd7	1.7084374	kelch repeat and BTB (POZ) domain containing 7	yes	1.7	10416653	
Oxct1	1.7065148	3-oxoacid CoA transferase 1	yes	2	10422608	
Pitpnc1	1.7061502	"phosphatidylinositol transfer protein, cytoplasmic 1"	yes	1.6	10392347	
Hdac9|LOC100504541	1.7050184	histone deacetylase 9 | histone deacetylase 9-like	yes	2	10399973	
Gm7092	1.7015926	predicted gene 7092			10561059	
Tspan5	1.6956868	tetraspanin 5	yes	1.9	10496494	
Cyb5b	1.6947773	cytochrome b5 type B	yes	1.7	10575153	
Tmeff2	1.6926005	transmembrane protein with EGF-like and two follistatin-like domains 2	yes	1.7	10346150	
B230118H07Rik	1.6865824	RIKEN cDNA B230118H07 gene			10485361	
Ephx1	1.6837863	"epoxide hydrolase 1, microsomal"	yes	2	10360684	
Leo1	1.6801876		yes	4	10587211	
Fdft1|Ctsb	1.674193	farnesyl diphosphate farnesyl transferase 1 | cathepsin B	yes	2	10420730	
2410127L17Rik	1.6735431	RIKEN cDNA 2410127L17 gene			10595205	
Abi3|Phospho1	1.6707822	"ABI gene family, member 3 | phosphatase, orphan 1"			10390186	
Hmgxb4	1.6673722	HMG box domain containing 4	yes	1.6	10572870	
Slc39a10	1.665988	"solute carrier family 39 (zinc transporter), member 10"	yes	2	10354389	
Abca9	1.6615306	"ATP-binding cassette, sub-family A (ABC1), member 9"	yes	1.6	10392560	
Kcnd3	1.6604408	"potassium voltage-gated channel, Shal-related family, member 3"	yes	2	10495083	
Rgl1	1.6545933	"ral guanine nucleotide dissociation stimulator,-like 1"	yes	2	10358733	
Itga3	1.6499547	integrin alpha 3	yes	1.9	10390117	
Nsdhl	1.6470624	NAD(P) dependent steroid dehydrogenase-like	yes	1.8	10600082	
Gdf11	1.6454612	growth differentiation factor 11	yes	7	10373583	
Lipo1	1.6453904	"lipase, member O1"	yes	1.7	10467110	
Sv2a	1.6448009	synaptic vesicle glycoprotein 2 a	yes	1.5	10494372	
Gm14005	1.6439998	predicted gene 14005			10487506	
Tbx3	1.6407844	T-box 3	yes	2	10525016	
Tmed4	1.6403915	transmembrane emp24 protein transport domain containing 4	No		10384138	
Plcb2	1.6362514	"phospholipase C, beta 2"	yes	5	10486119	
Pde5a	1.6245834	"phosphodiesterase 5A, cGMP-specific"	yes	1.7	10495794	
Nynrin	1.6241698	NYN domain and retroviral integrase containing	yes	1.3	10415413	
2410127L17Rik	1.6223229	RIKEN cDNA 2410127L17 gene			10461921	
Gpr81	1.6189703	G protein-coupled receptor 81	yes	2	10533725	
D830030K20Rik|Gm8050|Gm1973|Gm3278|Gm3033|LOC100504200	1.6178957	RIKEN cDNA D830030K20 gene | predicted gene 8050 | predicted gene 1973 | predicted gene 3278 | predicted gene 3033 | hypothetical protein LOC100504200			10412549	
Plk1s1	1.6165671	polo-like kinase 1 substrate 1	yes	2	10476819	
Heatr5b	1.6143032	HEAT repeat containing 5B	yes	1.5	10452935	
Cryab|Hspb2	1.6122575	"crystallin, alpha B | heat shock protein 2"	yes	2.4	10585214	
Dnajc13	1.6120332	"DnaJ (Hsp40) homolog, subfamily C, member 13"	yes	1.1	10596273	
Kank4	1.6070834	KN motif and ankyrin repeat domains 4	yes	1.8	10514576	
Ift80	1.6066772	intraflagellar transport 80 homolog (Chlamydomonas)	yes	2	10498599	
Icam2	1.6054317	intercellular adhesion molecule 2	yes	3	10392177	
Nme3|Mrps34	1.6049391	"non-metastatic cells 3, protein expressed in | mitochondrial ribosomal protein S34"	yes	4	10442643	
	1.603082				10589886	
Ing3	1.5989114	"inhibitor of growth family, member 3"	yes	1.9	10536620	
Arap2	1.5985658	"ArfGAP with RhoGAP domain, ankyrin repeat and PH domain 2"	yes	1.9	10530100	
Arhgef15	1.5976276	Rho guanine nucleotide exchange factor (GEF) 15	yes	2	10387201	
Sc4mol	1.59551	sterol-C4-methyl oxidase-like	yes	1.8	10578916	
Bcam	1.593789	basal cell adhesion molecule	yes	2	10560655	
Cpd	1.5926455	carboxypeptidase D	yes	1.5	10388591	
Pik3r3	1.591147	"phosphatidylinositol 3 kinase, regulatory subunit, polypeptide 3 (p55)"	yes	1.4	10507273	
Apobec1	1.5910059	"apolipoprotein B mRNA editing enzyme, catalytic polypeptide 1"	yes	3	10547621	
Ccdc46	1.590753	coiled-coil domain containing 46	yes	2	10382200	
Usp11	1.5872314	ubiquitin specific peptidase 11	yes	3	10598933	
Pcdh12	1.586965	protocadherin 12	yes	1.9	10458540	
Gucy1a3	1.5844939	"guanylate cyclase 1, soluble, alpha 3"	yes	2	10498952	
Klhdc10	1.5844879	kelch domain containing 10	yes	1.2	10536996	
Mrrf	1.5843275	mitochondrial ribosome recycling factor	No		10471715	
S1pr3	1.5824354	sphingosine-1-phosphate receptor 3	yes	1.9	10405179	
Spred2	1.5783315	"sprouty-related, EVH1 domain containing 2"	yes	1.8	10374455	
Mina|Crybg3	1.577158	myc induced nuclear antigen | beta-gamma crystallin domain containing 3	yes	1.3	10436428	
Praf2	1.5750757	PRA1 domain family 2	yes	1.9	10598403	
Zfp59	1.5735217	zinc finger protein 59	No		10551426	
Nudt1	1.5734664	nudix (nucleoside diphosphate linked moiety X)-type motif 1	yes	1.8	10526972	
Nsf	1.5708475	N-ethylmaleimide sensitive fusion protein	No		10391963	
Hnrnph3	1.5700958	heterogeneous nuclear ribonucleoprotein H3	yes	1.6	10369704	
Nek1	1.5693648	NIMA (never in mitosis gene a)-related expressed kinase 1	No		10571922	
Afap1l2	1.5690804	actin filament associated protein 1-like 2	yes	1.1	10468668	
Gngt2|Abi3	1.5686088	"guanine nucleotide binding protein (G protein), gamma transducing activity polypeptide 2 | ABI gene family, member 3"	Yes	1.7	10380571	
Chek2	1.5685672	CHK2 checkpoint homolog (S. pombe)	yes	1.2	10524266	
D4Bwg0951e	1.5682335	"DNA segment, Chr 4, Brigham & Women's Genetics 0951 expressed"			10505623	
Erlin1	1.5669757	ER lipid raft associated 1	yes	1.2	10467907	
Dock6	1.5629662	dedicator of cytokinesis 6	No		10591614	
Sc5d	1.5617789	"sterol-C5-desaturase (fungal ERG3, delta-5-desaturase) homolog (S. cerevisae)"	yes	1.5	10592585	
Arl5b	1.5580353	ADP-ribosylation factor-like 5B	yes	1.2	10469425	
Cyp51	1.5574309	"cytochrome P450, family 51"	yes	1.4	10527920	
Urb2	1.5568715	URB2 ribosome biogenesis 2 homolog (S. cerevisiae)	yes	1.8	10576403	
Szt2	1.5567696	seizure threshold 2	yes	1.4	10515735	
Wt1	1.5564398	Wilms tumor 1 homolog	yes	2.2	10474295	"Unexpected strong expression, but some other podocyte markers like nphs2  are absent."
Nfil3	1.5545236	"nuclear factor, interleukin 3, regulated"	yes	3	10409278	
Mis12	1.5542426	MIS12 homolog (yeast)	yes	1.5	10378024	
Mrvi1	1.5518662	MRV integration site 1	yes	1.9	10566943	
Ptgr2	1.5515102	prostaglandin reductase 2	yes	1.7	10397189	
2410127L17Rik	1.5500027	RIKEN cDNA 2410127L17 gene			10412481	
2410127L17Rik	1.548669	RIKEN cDNA 2410127L17 gene			10405727	
Fam162a	1.5485182	"family with sequence similarity 162, member A"	yes	1.8	10439276	
Rcan2	1.5473803	regulator of calcineurin 2	yes	2	10445325	
Asap2|Itgb1bp1	1.5427682	"ArfGAP with SH3 domain, ankyrin repeat and PH domain 2 | integrin beta 1 binding protein 1"	yes	1.6	10394862	
Inpp5b	1.5427302	inositol polyphosphate-5-phosphatase B	yes	2	10507933	
Arl6ip1	1.5412705	ADP-ribosylation factor-like 6 interacting protein 1	yes	1.2	10567219	
	1.539785				10369929	
Sh3bp2	1.5381088	SH3-domain binding protein 2	yes	4	10521205	
Arntl	1.5375586	aryl hydrocarbon receptor nuclear translocator-like	yes	2	10556463	
Acyp1	1.5365183	"acylphosphatase 1, erythrocyte (common) type"	yes	1.4	10401630	
Gm11277|Gm13646|Hist1h2bj|Hist1h2bk|Hist1h2bc|Hist1h2bl|Hist1h2bn|Hist1h2bm|Hist1h2bh|Hist1h2bf	1.5361031	"predicted gene 11277 | predicted gene 13646 | histone cluster 1, H2bj | histone cluster 1, H2bk | histone cluster 1, H2bc | histone cluster 1, H2bl | histone cluster 1, H2bn | histone cluster 1, H2bm | histone cluster 1, H2bh | histone cluster 1, H2bf"			10408087	
Tex261	1.5340616	testis expressed gene 261	No		10545751	
Ttc21b	1.5336562	tetratricopeptide repeat domain 21B	yes	1.3	10483264	
Cdk19	1.5332373	cyclin-dependent kinase 19	yes	1.9	10362676	
Lphn2	1.5308621	latrophilin 2	yes	1.4	10502776	
Atp1b2	1.5305144	"ATPase, Na+/K+ transporting, beta 2 polypeptide"	yes	1.8	10387505	
Pdia6	1.5246983	protein disulfide isomerase associated 6	yes	2	10394735	
Gm5820	1.5222114	predicted gene 5820			10455253	
2410016O06Rik	1.5219513	RIKEN cDNA 2410016O06 gene			10397143	
Pcdh18	1.521171	protocadherin 18	yes	1.6	10498018	
Atpbd4	1.520273	ATP binding domain 4	No		10486029	
Dhrs7	1.5194991	dehydrogenase/reductase (SDR family) member 7	yes	1.4	10400941	
Gpr155	1.5160629	G protein-coupled receptor 155	yes	3	10483679	
Satb1	1.5157527	special AT-rich sequence binding protein 1	yes	1.8	10451763	
Ptprd	1.5146763	"protein tyrosine phosphatase, receptor type, D"	yes	1.6	10513957	
Cdk7	1.5145283	cyclin-dependent kinase 7	yes	1.3	10411709	
Gja4	1.5141106	"gap junction protein, alpha 4"	yes	2	10516481	
Me2	1.5139232	"malic enzyme 2, NAD(+)-dependent, mitochondrial"	yes	1.6	10459730	
Dnmt3a	1.5136267	DNA methyltransferase 3A	yes	1.9	10394209	
Actr6	1.513531	ARP6 actin-related protein 6 homolog (yeast)	yes	1.4	10371830	
Chd7	1.5124208	chromodomain helicase DNA binding protein 7	yes	1.3	10503176	
Leprel1	1.5117835	leprecan-like 1	yes	1.9	10438753	
Fkbp4	1.5113667	FK506 binding protein 4	yes	3	10548194	
Socs6	1.5095421	suppressor of cytokine signaling 6	No		10460118	
Chtf8	1.5093912	"CTF8, chromosome transmission fidelity factor 8 homolog (S. cerevisiae)"	yes	1.4	10581499	
Mapt	1.5064192	microtubule-associated protein tau	yes	3	10381776	
Pdgfrb	1.5060952	"platelet derived growth factor receptor, beta polypeptide"	yes	1.6	10456046	
Fam102a	1.504892	"family with sequence similarity 102, member A"	yes	1.4	10471424	
Rapgef4	1.504411	Rap guanine nucleotide exchange factor (GEF) 4	yes	1.3	10472860	
Kbtbd3	1.5030783	kelch repeat and BTB (POZ) domain containing 3	yes	2	10582973	
Gm1973|D830030K20Rik|Gm8050|Gm10338|Gm3278|Gm3033|Gm3047|Gm8159|Gm10413|LOC100504200	1.5015879	predicted gene 1973 | RIKEN cDNA D830030K20 gene | predicted gene 8050 | predicted gene 10338 | predicted gene 3278 | predicted gene 3033 | predicted gene 3047 | predicted gene 8159 | predicted gene 10413 | hypothetical protein LOC100504200			10417245	
BC032203	1.5010756				10451481	
Cav2	1.5006204	caveolin 2	yes	1.9	10536494	
