# Supplementary material for: Pathogenic pathways are activated in each major cell type of the glomerulus in the Cd2ap mutant mouse model of focal segmental glomerulosclerosis
Source: BMC Nephrol. 2015 May 13;16:71. doi: 10.1186/s12882-015-0063-z (PMC4430919; doi:10.1186/s12882-015-0063-z)
Supplement: Additional file 4: Table S4. — RNA-seq defined genes higher in wild type mesangial cells compared to Cd2ap mutant. Fold change > 2.0. Columns show gene symbol, fold change, Gene ID, RPKM in mutant, RPKM in wild type and gene position as determined by chromosome, start and end. [file 12882_2015_63_MOESM4_ESM.xls]

Gene Symbol	FC Mut vs WT	Gene ID	Mut RPKM	WT RPKM	Chromosome	Start	End
Sele	338.47476	20339	3.479509	0.010399013	chr1	165978365	165987808
Cd209d	336.30362	170779	10.896444	0	chr8	3871824	3878499
Gpr176	326.686	381413	17.503464	0.0541993	chr2	118102834	118199155
Ms4a4d	289.52795	66607	5.9201474	0.020684374	chr19	11611339	11632956
Spp1	237.00143	20750.chr5.1	17.490261	0.074652724	chr5	104864130	104870072
Gdf6	187.61365	242316	27.03184	0.14575104	chr4	9771519	9789492
Dynlt1a	119.07141	100310872	6.237759	0.052993376	chr17	6310545	6317474
Siglech	105.343704	233274	9.120806	0.08758405	chr7	63023548	63034203
Lcn2	102.866844	16819	3.6100197	0.0355005	chr2	32240157	32243259
Timp1	91.59425	21857	3.0807848	0.034024637	chrX	20447292	20451863
Ccl4	80.193726	20303	10.911909	0.13764511	chr11	83476086	83478185
Gje1	62.63596	76743	281.80887	4.551255	chr10	14435432	14438020
Gm11428	61.10706	100034251	3.6431959	0	chr11	83517558	83519771
Cybb	58.335205	13058	5.6896143	0.09866263	chrX	9012378	9046450
Pld4	56.08228	104759	5.208702	0.09395162	chr12	113998866	114007197
Gbp1	55.994076	14468	3.7797666	0.06828468	chr3	142164226	142282140
Serpina3h	45.639553	546546	4.335395	0.09609211	chr12	105486106	105492615
Gp49a	45.61081	14727	3.4261413	0.07598677	chr10	51200479	51206025
Tslp	42.638645	53603	10.567189	0.25070122	chr18	32975037	32979453
Fn1	37.69822	14268	31.752712	0.85204077	chr1	71632097	71699745
Lgals3	34.30059	16854	3.977265	0.11729603	chr14	47993535	48005842
Galnt3	29.952003	14425	3.163972	0.106858045	chr2	65920823	65962850
A530016L24Rik	27.615803	319942	5.4192486	0.19850974	chr12	113727659	113738138
Igfbp3	27.367897	16009	48.350094	1.78713	chr11	7106096	7113926
Gm16880	27.158653	100503474	3.8242931	0.14244376	chr1	138592788	138622305
4930539J05Rik	27.151518	319587	5.9686303	0.2223725	chr3	135099187	135101629
Aldh1a2	26.52317	19378	342.61688	13.06724	chr9	71063596	71144050
Mpeg1	25.415386	17476	9.47511	0.3771273	chr19	12535269	12539775
Elmod1	23.33898	270162	4.649106	0.201506	chr9	53759267	53823108
Plac8	23.011992	231507	7.918046	0.34806812	chr5	100982752	101001224
Irf8	22.420622	15900	4.7545624	0.21451776	chr8	123260276	123280592
Col14a1	22.282032	12818	30.274717	1.3744398	chr15	55139305	55352358
Cd52	21.6669	23833	7.736831	0.3612158	chr4	133649453	133650988
Chrnb1	20.356853	11443	7.4748564	0.3714432	chr11	69597538	69609439
Ly6c2	19.69539	100041546	39.268967	2.0169046	chr15	74938591	74942379
Tyrobp	18.49925	22177	56.747776	3.1030948	chr7	31198807	31202598
Mirlet7c-2	17.955894	723966	5.6580477	0.3187571	chr15	85537033	85537127
Ptgs2	17.844154	19225	9.837997	0.5577134	chr1	151947254	151955142
Dpep1	17.400002	13479	107.238174	6.2344837	chr8	125710135	125725713
Cd4	17.061808	12504	5.57949	0.33080333	chr6	124814711	124838227
Gpr165	16.42617	76206	5.4148903	0.3334677	chrX	93908807	93914727
Fbn2	13.977525	14119	3.5282822	0.25534847	chr18	58168277	58369580
Spib	13.812736	272382	5.931515	0.43439662	chr7	51781365	51787441
Gm4070	13.644864	100042856	5.260742	0.39001226	chr7	113043633	113102484
Gvin1	13.386087	74558	5.2496367	0.3967126	chr7	113300050	113358854
Gpr56	12.787234	14766	8.629549	0.6826715	chr8	97501009	97538108
Frzb	12.783038	20378	33.16594	2.6245718	chr2	80252127	80287553
Mirlet7f-2	12.778122	387253	4.3047986	0	chrX	148346889	148346971
Per2	12.5888	18627	8.045305	0.64648515	chr1	93312559	93355905
Nr4a3	12.270727	18124	7.6481495	0.63050205	chr4	48058103	48096224
Laptm5	12.170702	16792	9.044219	0.7517197	chr4	130469249	130492063
Clca1	11.778364	12722	18.87382	1.6209712	chr3	144393280	144482458
Col3a1	11.755947	12825	10.971645	0.9440925	chr1	45368383	45406551
Degs2	11.651392	70059	4.8205905	0.41852644	chr12	109925002	109940516
Fam19a1	11.405251	320265	13.977743	1.2397459	chr6	96063148	96607191
Thbs1	11.094826	21825	192.53154	17.554226	chr2	117937658	117952869
Snord88c	11.040745	100217434	3.6752172	0	chr7	51505225	51505308
Sell	10.925793	20343	6.603473	0.6113922	chr1	165992207	166010916
Pcdh7	10.6570015	54216	16.026438	1.5212563	chr5	58109260	58523479
Cyp26b1	10.041221	232174	17.310698	1.7439277	chr6	84521408	84543902
Emp1	9.850266	13730	5.3101664	0.5453313	chr6	135312949	135333191
Errfi1	9.765778	74155	302.6771	31.352556	chr4	150228028	150242989
Cyp1b1	9.569856	13078	158.02408	16.70392	chr17	80106234	80114381
Zbtb16	9.508762	235320	3.6312892	0.3863113	chr9	48462402	48644327
A730049H05Rik	9.326229	74516	7.8318934	0.84949565	chr6	92766472	92793459
Ccdc68	9.130868	381175	15.681274	1.7372795	chr18	70085213	70129138
Kctd12	9.036318	239217	4.7442904	0.5311048	chr14	103375798	103381854
H2-DMa	8.999897	14998	8.194137	0.92101365	chr17	34259777	34276028
Atp1b1	8.709968	11931	3.675182	0.42683774	chr1	166367398	166388486
Ly6c1	8.647501	17067	49.806602	5.8263545	chr15	74875445	74879260
C1qtnf7	8.644226	109323	21.759686	2.5464025	chr5	43906808	44007825
Limch1	8.629818	77569	44.64884	5.233701	chr5	67137079	67448398
Nhsl1	8.232156	215819	4.944248	0.6075571	chr10	18127444	18253697
F730043M19Rik	8.187652	320046	4.0207734	0.49676463	chr12	33796576	33832462
Mt2	8.123602	17750	45.679764	5.688209	chr8	96696518	96697467
Pde4b	8.081215	18578	9.131624	1.1430672	chr4	101760346	102279867
Snord12	8.03303	100217443	3.4032931	0.17435049	chr2	166890793	166890858
Tnfsf8	7.872831	21949	7.510299	0.9649986	chr4	63493858	63522318
Cd33	7.798676	12489	4.6913347	0.6085215	chr7	50782826	50799798
Col12a1	7.733668	12816	484.55292	63.38055	chr9	79446798	79566485
Lbp	7.6290116	16803	4.140288	0.5489876	chr2	158132229	158158588
Sulf1	7.46072	240725	23.310402	3.160599	chr1	12682511	12850453
Ankrd1	7.4110994	107765	36.200397	4.9411864	chr19	36186455	36194334
Gpx3	7.387624	14778	29.186634	3.9964986	chr11	54716355	54723889
Slc7a5	7.145945	20539	7.634352	1.0807192	chr8	124405046	124431586
Gatsl3	7.12088	71962	3.5802982	0.50861114	chr11	4118254	4122412
Snord35a	7.1182566	27211	3.3519287	0.47634488	chr7	52381717	52381805
Elf4	7.0861087	56501	4.1078615	0.5864197	chrX	45764226	45816309
B3gnt3	6.9954967	72297	4.3313622	0.6263348	chr8	74215618	74227433
Fkbp1b	6.944957	14226	3.43997	0.50105506	chr12	4839980	4848401
4833417C18Rik	6.9011035	73906	9.743625	1.428244	chr11	95720179	95730345
Fam129a	6.7466435	63913	3.7123702	0.55662656	chr1	153418503	153566477
Ccl2	6.7399507	20296	18.529081	2.780978	chr11	81849079	81850954
Slc43a3	6.727523	58207	94.923874	14.273177	chr2	84776813	84798666
Stambpl1	6.6934376	76630	3.9906917	0.6031139	chr19	34266760	34314818
Tnnt2	6.6605377	21956	24.881094	3.7788577	chr1	137732963	137748838
Ccl17	6.6538463	20295	6.2003	0.942628	chr8	97334353	97335936
H2-Q6	6.5835834	110557	68.521034	10.528391	chr17	35561822	35579496
Rhbdf2	6.581201	217344	6.476167	0.9954358	chr11	116459479	116488333
Perp	6.5729294	64058	19.779797	3.0441306	chr10	18564877	18576878
Pecam1	6.503192	18613	14.39002	2.2383876	chr11	106515532	106576595
Abcg5	6.4823375	27409	7.096605	1.1074381	chr17	85057574	85082263
Cxcl1	6.4532237	14825	22.0456	3.4557772	chr5	91320271	91322141
Aff3	6.447966	16764	4.5947256	0.7208371	chr1	38234172	38721800
Serpina3f	6.415346	238393	13.430801	2.1177866	chr12	105452754	105480144
Col1a1	6.402778	12842	4.8500643	0.7662655	chr11	94797584	94813170
H2-Aa	6.3467917	14960	10.4184065	1.6605328	chr17	34419696	34424716
Snord47	6.292853	100217446	4.6370025	0.74540126	chr1	162968223	162968287
Fosl2	6.2189627	14284	48.66888	7.9165115	chr5	32438845	32460212
Gal3st3	6.118244	545276	17.195461	2.8430696	chr19	5298331	5308739
Col18a1	6.0771003	12822	22.492908	3.7441194	chr10	76514924	76629275
Itga6	6.04457	16403	5.398286	0.90342236	chr2	71625140	71694815
Fstl3	5.969125	83554	9.198396	1.5588408	chr10	79240019	79245375
Hist2h2bb	5.921204	319189	3.739207	0.63880736	chr3	96073623	96074115
Dcn	5.859085	13179	35.112312	6.0621977	chr10	96942134	96980796
Cpne7	5.780192	102278	24.545921	4.2957354	chr8	125641274	125659085
Lcp1	5.778368	18826.chr14.2	3.5529976	0.62199986	chr14	75530966	75630610
Csf2rb2	5.72943	12984	3.5664217	0.6296823	chr15	78112940	78136033
Uchl1	5.660911	22223	14.272625	2.550456	chr5	67067360	67078473
Fam198b	5.6554894	68659	11.72217	2.0967088	chr3	79689852	79750200
Coro1a	5.6057706	12721	6.81204	1.2292557	chr7	133843288	133848268
Ednrb	5.58029	13618	16.39022	2.9711785	chr14	104213842	104243390
Cnn1	5.566106	12797	3.5332074	0.6421228	chr9	21903697	21913665
Ifi204	5.5133376	15951	6.6885095	1.2271998	chr1	175677425	175697050
Ly6a	5.4799714	110454	62.487335	11.534912	chr15	74825307	74828331
1500015O10Rik	5.3693094	78896	3.9024494	0.73522335	chr1	43787447	43799409
Slc10a6	5.368688	75750	8.4018755	1.5831002	chr5	104034730	104058422
Pmp22	5.3679624	18858	227.67494	42.90483	chr11	62945012	62973048
Acp6	5.3080435	66659	20.34822	3.8778625	chr3	96962700	96980499
2200002D01Rik	5.2721963	72275	4.5424366	0.87156075	chr7	30032540	30033486
Gpihbp1	5.2479315	68453	7.687364	1.4818006	chr15	75427088	75428643
Ptprq	5.2399015	237523	7.029263	1.3570228	chr10	106954416	107157083
Gsta3	5.189946	14859	5.732335	1.1172986	chr1	21230670	21255640
Mgst1	5.186482	56615	8.594386	1.6762635	chr6	138089058	138105273
Ctss	5.1180143	13040	31.363876	6.199098	chr3	95330708	95360325
Eps8l1	5.1123	67425	3.3932843	0.6714358	chr7	4412317	4430844
Gm12253	5.1077886	624860	4.121408	0.8162311	chr11	58246061	58255124
Ier3	5.1021886	15937	34.826466	6.904834	chr17	35958658	35959856
Gm16845	4.930899	100503652	9.640267	1.9777131	chr9	21875476	21890566
Vgll3	4.921768	73569	6.7018666	1.3774475	chr16	65815878	65863311
Ociad2	4.921259	433904	48.145317	9.896427	chr5	73713438	73729878
Per1	4.9024496	18626	24.60197	5.0764165	chr11	68908756	68923459
Chchd10	4.8952656	103172	5.794681	1.1974399	chr10	75396212	75400479
Myc	4.882237	17869	7.338147	1.5204355	chr15	61816896	61821916
Alox5ap	4.8416553	11690	49.29328	10.298981	chr5	150076634	150099623
Slc2a6	4.8399415	227659	5.100732	1.0660871	chr2	26876885	26883518
Abca1	4.7178535	11303	17.214935	3.6911478	chr4	53043661	53172767
Rac2	4.6572957	19354	4.8933225	1.0628461	chr15	78389599	78403213
Fzd2	4.645057	57265	6.8751297	1.497236	chr11	102465745	102469372
Ptch2	4.6173162	19207	3.085329	0.67594653	chr4	116768961	116787436
2700023E23Rik	4.6163473	70036	6.215952	1.362102	chr5	74489108	74490361
Gpr116	4.6056123	224792	12.772859	2.8054397	chr17	43526415	43596506
Zbp1	4.5812497	58203	4.1656313	0.9198082	chr2	173032114	173044423
Tmem178	4.510226	68027	8.677249	1.946185	chr17	81343972	81401156
F530104D19Rik	4.4828978	676676	8.93371	2.0159204	chr19	36523482	36525647
Gsto1	4.478508	14873	24.517452	5.537863	chr19	47929479	47939278
Was	4.451028	22376	27.27116	6.1978884	chrX	7658592	7667617
Fas	4.4407005	14102	4.6589465	1.0612965	chr19	34365149	34402260
Fcer1g	4.3766932	14127	25.884901	5.9827504	chr1	173159703	173164480
Cd300lg	4.3763375	52685	4.295192	0.9928237	chr11	101902825	101916931
Gfod2	4.359529	70575	3.0485027	0.7073715	chr8	108240013	108282507
Lrrc8d	4.335959	231549	9.05712	2.113028	chr5	106128988	106244234
Ak1	4.320889	11636	17.675404	4.1380606	chr2	32477278	32490578
2310046K01Rik	4.3135543	69698	9.894168	2.3203006	chr2	151822247	151834994
Fjx1	4.3124027	14221	6.4892178	1.5222064	chr2	102289523	102291949
H2-Q9	4.297241	110558	289.93777	68.252014	chr17	35576100	35580718
Klf15	4.2834024	66277	7.1921744	1.698524	chr6	90412620	90425203
Epha1	4.2738543	13835	6.040233	1.4296658	chr6	42308486	42323267
Icam1	4.266401	15894	15.286689	3.6245327	chr9	20820404	20833240
Mmd	4.2590127	67468	6.5467052	1.5549431	chr11	90048997	90139887
Egr1	4.246966	13653	97.33452	23.184008	chr18	35020861	35024610
Tgm2	4.207852	21817	4.1702213	1.0025337	chr2	157942141	157972128
Mbp	4.196926	17196	6.859204	1.6532664	chr18	82644515	82755029
Pde2a	4.196427	207728	7.3842807	1.7800373	chr7	108570212	108661341
Mmp3	4.189128	17392	6.270132	1.5140963	chr9	7445822	7455974
Nhs	4.1804543	195727	6.4642	1.5641979	chrX	158274200	158597722
Inf2	4.172877	70435	5.677564	1.3763436	chr12	113826995	113853768
Pxmp2	4.137566	19301	3.1311197	0.7655176	chr5	110703305	110715187
Flad1	4.125058	319945	9.903669	2.4286582	chr3	89205818	89215791
Usp53	4.1222672	99526	20.802355	5.1047773	chr3	122636519	122687365
Fbln5	4.122098	23876	21.232622	5.210578	chr12	102984775	103057265
Slamf9	4.1090612	98365	4.9417186	1.2165664	chr1	174405491	174408540
C1qtnf3	4.0865364	81799	8.618921	2.1335258	chr15	10882087	10909917
Gm15708	4.0545325	100504231	4.5342484	1.1312666	chr5	145037930	145041382
Fgf2	4.000381	14173	15.037681	3.8025932	chr3	37247575	37303752
Cygb	3.986643	114886	82.271454	20.875763	chr11	116506909	116515627
Spn	3.965249	20737	65.86619	16.803213	chr7	134276978	134281331
Loxl2	3.9554763	94352	82.542435	21.10954	chr14	70008936	70095641
Col8a1	3.9485247	12837	218.9177	56.084976	chr16	57624369	57754850
H2-Q8	3.9476373	15019	91.733986	23.506796	chr17	35531044	35532577
Fat4	3.9306104	329628	20.430307	5.257936	chr3	38785862	38910905
Tmtc1	3.9130852	387314	27.714382	7.164509	chr6	148180952	148392874
Abcb1a	3.8674653	18671	57.338192	14.997464	chr5	8660092	8748570
Ctsk	3.8514435	13038	23.220602	6.098884	chr3	95303208	95313284
Pgd	3.8461795	110208	101.674164	26.741228	chr4	148524094	148540816
Fzd5	3.8025045	14367	3.3091736	0.88033944	chr1	64777132	64784324
Uxt	3.784461	22294	8.235528	2.2013445	chrX	20528791	20539104
Bhlhe40	3.776801	20893	22.912615	6.1369295	chr6	108610623	108616919
Figf	3.76575	14205	511.1165	137.29948	chrX	160811480	160840579
Slc15a3	3.763015	65221	9.250826	2.4868236	chr19	10917034	10933852
Maff	3.7547557	17133	4.699552	1.266121	chr15	79178108	79189506
Eno3	3.7539306	13808	8.494241	2.288963	chr11	70470715	70476015
Zfp57	3.6796355	22715	4.5930333	1.2626852	chr17	37138108	37147674
Ogn	3.6753752	18295	22.829298	6.2833514	chr13	49703440	49719869
Spint2	3.671484	20733	14.2670965	3.9309218	chr7	30041349	30066996
Plek	3.6657982	56193	3.2597485	0.89953053	chr11	16871209	16952384
Per3	3.6505322	18628	3.610683	1.0005381	chr4	150377764	150418731
Rnase4	3.6470203	58809	76.59198	21.244452	chr14	51710752	51725826
2610019E17Rik	3.6318302	75614	18.14955	5.0552278	chr17	24665196	24665688
Zc3h12a	3.6263163	230738	7.676067	2.1412802	chr4	124795658	124805125
Zfp472	3.596685	224691	3.382526	0.95134735	chr17	33102776	33116156
Ssh3	3.5565152	245857	3.1177995	0.88679636	chr19	4261668	4269172
Eln	3.5512753	13717	3.68944	1.050937	chr5	135178466	135223124
Cxcl9	3.549725	17329	21.233797	6.051085	chr5	92750357	92757105
Plekhf1	3.5338385	72287	9.771158	2.7970476	chr7	39005673	39013013
5430416O09Rik	3.5230591	71406	3.045686	0.8745115	chr4	43742906	43747406
Cdo1	3.5058885	12583	8.271134	2.386532	chr18	46872859	46887996
Serpine1	3.4920664	18787	24.030323	6.961095	chr5	137537376	137548142
Hilpda	3.4876232	69573	11.22945	3.257087	chr6	29222488	29225449
Fzd7	3.4732761	14369	34.690678	10.103546	chr1	59538991	59543799
Eltd1	3.4583855	170757	5.0427513	1.4750086	chr3	151100846	151208045
Nbl1	3.4551716	17965	10.214003	2.9903834	chr4	138638207	138648885
Socs3	3.4508848	12702	22.8397	6.695151	chr11	117827401	117830680
Isoc1	3.4144049	66307	37.637455	11.150789	chr18	58819136	58839224
Adamts4	3.4060154	240913	3.1982644	0.949879	chr1	173180553	173190053
Kdelr3	3.3984354	105785	5.4330444	1.6172037	chr15	79346838	79358169
Mnda	3.3937995	381308	16.256254	4.8454576	chr1	175826486	175843258
Zc3h6	3.386742	78751	4.3390102	1.296011	chr2	128793138	128844299
Ntn4	3.3672285	57764	6.639095	1.9945123	chr10	93103794	93208717
Nnat	3.3507078	18111	3.6393242	1.098714	chr2	157385846	157388255
Sh3bp5	3.34462	24056	106.165634	32.109795	chr14	32173066	32249219
Anxa3	3.3256776	11745	36.378605	11.065375	chr5	97222404	97274987
Dbp	3.3225002	13170	8.830623	2.688603	chr7	52960617	52965573
Tgif1	3.2936928	21815	3.8583577	1.1850041	chr17	71193545	71202872
Pdlim1	3.2877316	54132	11.974156	3.6842484	chr19	40296729	40346106
Hcls1	3.269443	15163	5.1923375	1.6065327	chr16	36935069	36963300
Cgnl1	3.2682407	68178	16.415611	5.0809317	chr9	71474316	71619409
Adarb1	3.2664006	110532	5.3729525	1.6639644	chr10	76753472	76881018
Tnfrsf12a	3.2638752	27279	17.273249	5.3535366	chr17	23812412	23814416
Jak3	3.2611816	16453	8.822047	2.7364953	chr8	74200282	74214476
Mgl2	3.2554963	216864	3.6910074	1.1469069	chr11	69943859	69951050
Hmgn3	3.254966	94353	28.013823	8.706158	chr9	83003549	83040214
Hspg2	3.2521636	15530	35.748524	11.119522	chr4	137024718	137126545
Irak3	3.2520936	73914	6.5282173	2.0306356	chr10	119578710	119638593
Sod3	3.2359815	20657	28.365616	8.8672	chr5	52755043	52760977
Hmox1	3.225888	15368	44.56948	13.976185	chr8	77617517	77624492
Rerg	3.2250392	232441	17.868675	5.6047716	chr6	137003346	137119017
Csrp2	3.1881595	13008	57.724667	18.315626	chr10	110357232	110376570
AA388235	3.1772172	433100	6.7556086	2.1508892	chr17	34118437	34122303
9330175E14Rik	3.1702404	320377	3.3036752	1.0541576	chr8	96957027	96959003
Tgfb2	3.1644125	21808	16.108612	5.149502	chr1	188447065	188529871
Cyp39a1	3.1592062	56050	8.306696	2.6598103	chr17	43804374	43888380
Klk1	3.15619	16612	6.9411645	2.2246912	chr7	51480807	51484987
Tspan2	3.1463203	70747	15.47375	4.9750004	chr3	102538693	102576215
Plec	3.1290987	18810	12.879542	4.163721	chr15	76001404	76063000
2610035D17Rik	3.129077	72386	4.835253	1.56316	chr11	112905220	113063152
Acer2	3.126694	230379	24.253302	7.846682	chr4	86520318	86580726
Mest	3.123806	17294	14.761572	4.7802296	chr6	30683506	30698457
Rmrp	3.1064231	19782	70.26105	22.879921	chr4	43505657	43505931
Prkar2b	3.1034522	19088	11.856152	3.8645506	chr12	32643342	32746144
Abcg1	3.1024985	11307	14.757127	4.8116117	chr17	31194639	31254926
Lag3	3.0818791	16768	3.9858255	1.3082875	chr6	124854377	124861723
Ece1	3.0808802	230857	15.324749	5.0317497	chr4	137418152	137521144
F2r	3.0797968	14062	1851.1329	608.01685	chr13	96371744	96388388
Angpt4	3.0760837	11602	14.303617	4.703792	chr2	151737068	151770390
Bmx	3.0556266	12169	18.1347	6.0035806	chrX	160630774	160696125
Fam102b	3.0508473	329739	11.609317	3.8493412	chr3	108773915	108830525
Tmem53	3.0373561	68777	3.5523539	1.1830989	chr4	116924594	116941185
Ang	3.0299163	11727	6.0976486	2.0357862	chr14	51710752	51721684
Abcb1b	3.0251522	18669	5.4853425	1.834243	chr5	8798147	8866314
Nr4a1	3.023515	15370	31.620647	10.57935	chr15	101097277	101105225
Tef	2.9963183	21685	13.430434	4.5342183	chr15	81633103	81657293
Lfng	2.9794846	16848	9.887199	3.356855	chr5	141083295	141091499
Snora64	2.9753199	104366	3.3038523	1.1232784	chr17	24857734	24857850
Ifngr1	2.965365	15979	143.7914	49.051815	chr10	19311764	19330031
Tmem47	2.9617662	192216	20.18835	6.8952584	chrX	78315983	78343214
Clu	2.9577494	12759	4.2115746	1.4404013	chr14	66587320	66600382
Mir103-2	2.9572978	723825	21.143665	7.232453	chr2	131113788	131113873
Gm17227	2.9418585	100503986	4.653478	1.6001335	chr19	7372148	7379018
Rin1	2.9363866	225870	4.6080074	1.5874515	chr19	5050808	5057071
Cdr2	2.9245563	12585	8.068226	2.7907345	chr7	128100550	128125826
2700033N17Rik	2.9186177	72603	9.846897	3.412892	chr2	115891954	115893097
1500011B03Rik	2.913498	66236	12.9846525	4.5083323	chr5	115258205	115263985
Lgals4	2.9085562	16855	9.867284	3.431789	chr7	29619011	29626722
Slc25a27	2.9038477	74011	3.1980083	1.1140541	chr17	43775802	43803964
Arrdc3	2.8856442	105171	35.435833	12.422252	chr13	81022683	81035303
Cplx2	2.8854992	12890	12.968389	4.5463753	chr13	54472713	54485278
Litaf	2.8746247	56722	67.6019	23.789112	chr16	10959366	10993214
C78339	2.8709416	97863	5.269805	1.8568234	chr13	46764891	46771142
Gulp1	2.8699596	70676	29.32054	10.334666	chr1	44608516	44853681
Pparg	2.8691876	19016	18.858381	6.6488404	chr6	115311239	115440419
A630001G21Rik	2.8679788	319997	3.2834432	1.158121	chr1	87613658	87633181
E330018D03Rik	2.86402	320319	18.01369	6.362492	chr19	45836346	45839319
Wdr92	2.8587768	103784	76.233604	26.975315	chr11	17111896	17135203
1700034J05Rik	2.8562486	73344	3.9968438	1.4155384	chr6	146899823	146902943
Rpph1	2.851946	85029	291.01532	103.22268	chr14	51427122	51427446
Cdk18	2.8483455	18557	8.977283	3.1882513	chr1	134010124	134036262
5930416I19Rik	2.8381166	72440	6.57419	2.343216	chr6	128307018	128312915
Adm	2.8356092	11535	9.710824	3.4642582	chr7	117771183	117773333
Gm16867	2.8297045	100504489	3.632232	1.2984725	chr14	69981969	70040083
Acta2	2.8246267	11475	283.15564	101.40626	chr19	34314827	34329826
Scarna9	2.8185937	100216535	35.55819	12.761671	chr9	15130733	15130774
Mir703	2.8062854	735265	15.856136	5.715655	chr5	98904575	98904683
Il6ra	2.7892227	16194	27.283731	9.895116	chr3	89673246	89717084
Stab2	2.7870793	192188	3.275417	1.1888243	chr10	86303955	86470687
Plau	2.7864144	18792	351.11295	127.46815	chr14	21655884	21662610
Apold1	2.7808654	381823	4.3072915	1.5668406	chr6	134932019	134936854
Gm3593	2.7782903	100041962	464.41507	169.09438	chr13	62184507	62397530
Slc27a3	2.773162	26568	31.172691	11.371016	chr3	90189155	90193849
Cxcl10	2.759354	15945	75.76417	27.775187	chr5	92775667	92777880
Cldn1	2.746423	12737	30.902752	11.382304	chr16	26356732	26371925
Lgals1	2.7435544	16852	110.714134	40.821594	chr15	78757155	78760895
Fscn1	2.741038	14086	18.440083	6.805315	chr5	143722034	143734868
Pmepa1	2.7291055	65112	13.667172	5.0659237	chr2	173049966	173102034
Gypc	2.7190232	71683	15.480657	5.7593946	chr18	32687974	32719688
A730011C13Rik	2.7186954	319916	3.2627192	1.2140025	chr3	94798965	94801272
2900026A02Rik	2.7159498	243219	11.007542	4.099862	chr5	113515343	113592333
C230035I16Rik	2.7157524	320842	6.7145586	2.501081	chr13	23519845	23522886
Ngf	2.7136545	18049	145.61075	54.279907	chr3	102273851	102324936
Cd9	2.7107313	12527	5.044424	1.8824589	chr6	125410284	125444773
Fblim1	2.7097807	74202	102.03055	38.088726	chr4	141131977	141161967
Plekho1	2.7029011	67220	11.112003	4.1587477	chr3	95792763	95799762
Col27a1	2.6894886	373864	5.299277	1.9931847	chr4	62876446	62996024
Ifi205	2.689238	226695	7.9458203	2.98889	chr1	175942129	175961886
Spon2	2.6837842	100689	32.787388	12.358329	chr5	33556167	33560887
Ddb2	2.6823175	107986	4.761001	1.7955128	chr2	91051739	91077223
Hoxb9	2.6802616	15417	9.397086	3.5466359	chr11	96132644	96137907
Lmod1	2.674156	93689	6.308277	2.3862958	chr1	137221390	137264642
Lrrc32	2.6643631	434215	142.0315	53.92516	chr7	105642732	105650340
Cdh11	2.6607409	12552	13.688572	5.2042255	chr8	105156895	105309011
Pram1	2.6599479	378460	3.860418	1.4681208	chr17	33767704	33782651
Fam20a	2.648214	208659	6.643361	2.5376692	chr11	109531063	109583570
Cp	2.6441052	12870	229.685	87.872795	chr3	19857054	19908792
Cdh5	2.6425362	12562	8.374891	3.2059639	chr8	106625525	106668402
Gjb2	2.6415467	14619	4.769522	1.8264887	chr14	57717439	57723539
Lyz2	2.6387491	17105	11.087959	4.2506375	chr10	116714597	116728249
Thbd	2.6346977	21824	3.224394	1.2379916	chr2	148230207	148233924
Hrct1	2.6159549	100039781	113.05359	43.717415	chr4	43740070	43740982
9530026P05Rik	2.6147466	330385	5.0075192	1.9372845	chr6	92890576	93222971
Prcp	2.6141615	72461	5.009553	1.9385047	chr7	100023763	100083091
Tagln	2.6109726	21345	97.45215	37.756317	chr9	45737711	45744141
Cln6	2.6075177	76524	27.054064	10.495557	chr9	62686594	62699809
Bmp2	2.5990443	12156	28.17307	10.965308	chr2	133378935	133388621
Kdr	2.595854	16542	5.72721	2.2318401	chr5	76329299	76374453
Phf15	2.587427	76901	10.793677	4.219895	chr11	51626958	51670983
Armcx5	2.5855172	494468	9.083367	3.553857	chrX	132277231	132281865
Rab37	2.5750818	58222	11.2392435	4.415161	chr11	114952745	115023554
S100a6	2.5731828	20200	211.36568	83.09294	chr3	90416816	90418336
Mbnl3	2.57014	171170	126.63873	49.843708	chrX	48466671	48559009
Wwp1	2.5698545	107568	35.825886	14.102268	chr4	19536820	19636140
Cry2	2.565287	12953	13.138104	5.1808043	chr2	92243804	92274226
Arsg	2.5634124	74008	6.216216	2.4530592	chr11	109334688	109434643
AI607873	2.5631456	226691	3.3702264	1.3301054	chr1	175653815	175671878
Spon1	2.5571218	233744	4.3603063	1.7249076	chr7	120909512	121186889
Hoxb6	2.5535946	15414	12.730396	5.0430174	chr11	96160485	96162883
Cirbp	2.5532181	12696	100.43773	39.79325	chr10	79630586	79634398
Snord2	2.5514138	100216532	8.603672	3.41117	chr16	23109026	23109093
2210403K04Rik	2.5436733	100042498	18.186972	7.2326827	chr11	75275041	75280192
Gm9746	2.542784	100039257	11.986505	4.768519	chr14	27022153	27026527
Gm10395	2.542784	100039192	11.986505	4.768519	chr14	26882537	26886911
D14Ertd449e	2.542784	66039	11.986505	4.768519	chr14	26742784	26747158
Gm11626	2.5357993	100502949	40.435898	16.130676	chr11	101318224	101327513
Plat	2.5346262	18791	25.81717	10.303751	chr8	23868216	23893320
Cyp4v3	2.5270336	102294	5.2085705	2.0850086	chr8	46391156	46418550
Snx30	2.5270243	209131	6.2340527	2.495523	chr4	59818522	59917612
Gnal	2.5073798	14680	3.7232704	1.5021209	chr18	67247990	67386445
Sat1	2.504509	20229	90.19686	36.430836	chrX	151647682	151650952
Snord17	2.5011454	100313519	3.0491037	1.2332007	chr2	144091718	144091938
Ccl6	2.5004363	20305	4.274234	1.7291908	chr11	83401388	83406589
Akap12	2.4952054	83397	121.89336	49.416767	chr10	5987070	6080212
Timp3	2.4886477	21859	510.53586	207.52153	chr10	85763157	85812250
Fabp4	2.4814894	11770	6.721488	2.7400181	chr3	10204343	10208576
AI464196	2.45081	100503330	9.330289	3.8511095	chr3	89014347	89017086
Pi16	2.4491808	74116	6.2876782	2.5969877	chr17	29455827	29466044
Cldn15	2.4407248	60363	88.49375	36.67703	chr5	137443739	137451715
Ramp2	2.4378877	54409	9.705459	4.027197	chr11	101107648	101109564
Lox	2.4367833	16948	3.3858376	1.4055605	chr18	52676892	52689521
B4galt5	2.435772	56336	17.057781	7.0841265	chr2	167123945	167174678
3110003A17Rik	2.4336941	73112	9.003408	3.7423239	chr10	17731067	17743058
Adam22	2.4334044	11496	19.388338	8.059845	chr5	8072352	8368081
Creb3l1	2.431922	26427	12.293654	5.113658	chr2	91822485	91864327
Slc1a5	2.4290798	20514	3.548224	1.4776436	chr7	17366695	17383623
Mrps18b	2.428484	66973	7.8186927	3.2568614	chr17	36047330	36053314
Xist	2.416827	213742	101.43406	42.45595	chrX	100655712	100678572
2900002K06Rik	2.410249	70226	3.3746374	1.4163338	chrX	7722553	7725089
Ptpru	2.4069214	19273	3.0445442	1.2795608	chr4	131324372	131394193
1500012F01Rik	2.4055502	68949	24.351303	10.240199	chr2	166888434	166891362
Pcdhb22	2.40272	93893	3.2949479	1.3872218	chr18	37678007	37681073
Tlr7	2.392382	170743	3.400151	1.4376998	chrX	163742863	163768469
Tmem132a	2.37563	98170	9.119132	3.8830695	chr19	10932319	10944269
F2rl1	2.3745058	14063	4.7325444	2.016146	chr13	96281684	96295195
Ssx2ip	2.370809	99167	5.8639555	2.5020409	chr3	146067606	146103101
Dtx4	2.3633907	207521	3.053125	1.3068004	chr19	12540826	12576635
Tgfbi	2.3626697	21810	3.3456564	1.4324472	chr13	56710964	56740700
Cacnb3	2.3618882	12297	11.020873	4.7201624	chr15	98462651	98474961
Slc38a2	2.359613	67760	93.87694	40.24562	chr15	96517823	96530129
Rtn4rl2	2.35299	269295	5.861416	2.5198972	chr2	84712103	84726849
Pik3ip1	2.3449807	216505	6.782603	2.9258873	chr11	3230734	3242974
Gm15880	2.3425639	100504375	6.1787386	2.668141	chr7	87780906	87788934
Rdh10	2.3406754	98711	7.937458	3.4303684	chr1	16095963	16122631
A630033H20Rik	2.3352957	213438	4.76407	2.0636525	chrX	104344266	104369000
Btg2	2.3350902	12227	32.11525	13.912594	chr1	135971442	135975732
Rbm12	2.3326225	75710	3.4724197	1.5058726	chr2	155920618	155937701
Ly96	2.32956	17087	17.088213	7.420328	chr1	16678537	16699686
Pdcd2l	2.3293476	68079	9.950195	4.3211346	chr7	34969516	34981666
Osmr	2.328196	18414	156.36589	67.939575	chr15	6763577	6824313
Cyp4b1	2.3212063	13120	8.07905	3.520846	chr4	115297333	115320310
Ptpla	2.3199377	30963	7.7613735	3.3842516	chr2	13771909	13977662
AA465934	2.3179634	613254	3.995211	1.7435466	chr11	83105201	83108139
Nek6	2.3166971	59126	17.07619	7.456277	chr2	38367217	38443010
Zyx	2.3162746	22793	118.69248	51.836266	chr6	42299827	42310145
Umps	2.315728	22247	4.267854	1.8643281	chr16	33955098	33967089
Rell1	2.3140128	100532	22.306623	9.751431	chr5	64300137	64360136
Rbm3	2.311698	19652	77.041214	33.71261	chrX	7716101	7722928
Poln	2.3110929	272158	8.002684	3.5028274	chr5	34349847	34512097
Syt12	2.30959	171180	9.767787	4.2782054	chr19	4445908	4477143
Gm13841	2.3083072	665032	5.2156696	2.2856874	chr5	116251566	116252203
Tnfrsf19	2.3063953	29820	27.816084	12.200075	chr14	61582671	61665692
Cd74	2.306217	16149	16.342546	7.168363	chr18	60963503	60972306
Mt1	2.3021	17748	83.881584	36.85892	chr8	96702989	96704227
Ctnnal1	2.2915812	54366	4.1409082	1.8279353	chr4	56823807	56878083
Ppp1r14a	2.2912314	68458	10.204334	4.5052204	chr7	30074339	30078409
Pde7b	2.289286	29863	21.110802	9.328357	chr10	20117810	20444874
Ly6e	2.2892647	17069	181.57361	80.233795	chr15	74785481	74790335
Lama2	2.2879758	16773	7.284046	3.2204874	chr10	26701092	27336748
Tmem198b	2.287225	73827	5.2162127	2.3069954	chr10	128237092	128241426
Igsf6	2.283643	80719	5.466351	2.4214182	chr7	128207581	128218044
Hlf	2.2834444	217082	16.147339	7.1533713	chr11	90197849	90252231
Cd302	2.28167	66205	37.21205	16.497992	chr2	60090050	60122475
Pdlim5	2.2788966	56376	48.493053	21.525602	chr3	141902549	142058660
Pam	2.2744808	18484	15.128846	6.728591	chr1	99717671	99992209
Cyth1	2.2710285	19157	9.99451	4.451838	chr11	118025480	118109906
Celf2	2.2690237	14007	17.3497	7.73488	chr2	6460744	7317825
Kctd13	2.2683105	233877	5.084066	2.2672994	chr7	134072393	134089123
Cebpb	2.2652824	12608	10.5393	4.706411	chr2	167514415	167515918
Gm2a	2.2622318	14667	23.423683	10.474143	chr11	54911619	54924400
C030044B11Rik	2.2602005	68128	6.343622	2.8391657	chr13	49063481	49067402
Runx2	2.254457	12393	15.737339	7.0613837	chr17	44740950	44951746
Ldlrad3	2.2517374	241576	17.111479	7.6872334	chr2	101790358	102026534
Pi15	2.2475276	94227	24.23037	10.905748	chr1	17591982	17621020
P4ha3	2.2428577	320452	4.141414	1.8678733	chr7	107434030	107468209
Tnfaip3	2.2411807	21929	8.033898	3.6261847	chr10	18720717	18735216
Kank1	2.2388146	107351	10.248267	4.630554	chr19	25311692	25508986
Sema4b	2.2370098	20352	23.214432	10.497615	chr7	87331727	87371410
Ifi30	2.236363	65972	14.758442	6.6757274	chr8	73286672	73290562
Cfp	2.235722	18636	5.913635	2.675698	chrX	20502661	20508650
Pxdn	2.2308593	69675	16.715534	7.579635	chr12	30622901	30702523
Gm13456	2.229363	666531	3.4259722	1.5545456	chr2	40412524	40412954
Slc25a24	2.229242	229731	14.392854	6.5311565	chr3	108926067	108971327
Il15ra	2.2258	16169	3.0525093	1.3873023	chr2	11627163	11655589
Gm12758	2.225111	100126229	4.5404124	2.0641634	chr7	35019396	35025226
Fkbp5	2.224802	14229	24.994967	11.364798	chr17	28536040	28654469
H6pd	2.2245476	100198	302.4415	137.53085	chr4	149353590	149383132
Enoph1	2.222324	67870	5.351894	2.4361305	chr5	100469013	100497784
Ifitm5	2.2211857	73835	5.0379944	2.294422	chr7	148134861	148136138
Zcchc4	2.2172015	78796	3.5434837	1.6166865	chr5	53166648	53215903
Olfr56	2.2154198	18356	46.664516	21.307434	chr11	48864235	48948889
Pim1	2.2127993	18712	7.1682596	3.2769668	chr17	29627990	29632404
Polr3d	2.2115417	67065	5.444865	2.490534	chr14	70838555	70843278
Gm8210	2.2067955	666642	7.411382	3.3973286	chr1	43245966	43246603
Adra1d	2.2036862	11550	3.7475498	1.7202764	chr2	131371093	131388021
Filip1l	2.202286	78749	37.358074	17.159758	chr16	57353390	57572917
Kctd12b	2.2013996	207474	22.880116	10.513801	chrX	150119697	150130823
Ankrd23	2.1990304	78321	3.1832073	1.4643135	chr1	36587379	36596203
Acsf2	2.1968858	264895	29.29675	13.490011	chr11	94418416	94463100
Nfkbiz	2.1958086	80859	9.132651	4.207292	chr16	55811490	55838754
Ppfibp1	2.1928988	67533	63.398205	29.245481	chr6	146837016	146980545
Gimap4	2.1911788	107526	9.502729	4.387031	chr6	48634577	48642061
Cadm4	2.189877	260299	78.644775	36.32876	chr7	25267042	25289552
Rab3d	2.1890492	19340	9.204556	4.253512	chr9	21711955	21722565
Ptbp2	2.187902	56195	8.626195	3.9883378	chr3	119421464	119486306
Fuca1	2.1859403	71665	51.56973	23.864746	chr4	135476641	135496215
Nlrc5	2.1855428	434341	6.7413893	3.1202579	chr8	96996663	97051172
4930426L09Rik	2.1844459	74629	3.3444068	1.5487392	chr2	18919946	18921431
Bcl2l11	2.1840222	12125	6.949665	3.2188973	chr2	127951774	127988283
Atf3	2.183286	11910	6.463849	2.9948914	chr1	192994176	193041918
Bmp4	2.1779625	12159	97.59688	45.330032	chr14	47003196	47010274
Swap70	2.175873	20947	14.681491	6.8255405	chr7	117365217	117427020
Cdkn2c	2.1758285	12580	8.137215	3.7831316	chr4	109333481	109339262
Ghr	2.1753166	14600	11.27909	5.245081	chr15	3267760	3533230
Rps20	2.175052	67427	266.33936	123.86999	chr4	3761620	3762747
B4galt1	2.1742399	14595	40.536297	18.85979	chr4	40751635	40801031
Rftn1	2.1722674	76438	37.266132	17.354067	chr17	50132632	50329822
Diap1	2.1721482	13367	29.468437	13.723599	chr18	38003255	38095065
2310079F23Rik	2.1719687	78890	4.251714	1.9802074	chr5	35898858	35917719
Hist1h1c	2.170096	50708	29.226877	13.623979	chr13	23830676	23832236
Slc6a9	2.165682	14664	10.430459	4.8720202	chr4	117507863	117541910
Spink8	2.16545	78709	100.91817	47.143475	chr9	109719141	109729141
Nlrp1a	2.1608844	195046	4.123048	1.9301336	chr11	70904699	70958206
Ctsh	2.1599631	13036	10.55739	4.9443684	chr9	89949105	89970933
Bcl6	2.1588883	12053	13.636375	6.3895335	chr16	23965138	23988698
Adck3	2.1582606	67426	5.563613	2.6076748	chr1	182095369	182126151
Gpr126	2.152076	215798	11.309523	5.3160257	chr10	14122391	14264842
Nipa1	2.15076	233280	6.2792993	2.9533818	chr7	63233854	63274943
H2-T22	2.1501153	15039	35.90147	16.890833	chr17	36175354	36179647
Tarbp2	2.14742	21357	5.5648265	2.6214108	chr15	102348677	102354107
Klf10	2.1419964	21847	12.769917	6.0307274	chr15	38224168	38230462
Iigp1	2.1362612	60440	56.027367	26.530542	chr18	60535683	60552283
Enpp4	2.1336403	224794	26.672527	12.645712	chr17	44233259	44242757
Cars	2.1306748	27267	5.4731336	2.5984786	chr7	150743610	150785947
Cox6b2	2.1289926	333182	10.644503	5.0576835	chr7	4703396	4704696
Tmco4	2.1275806	77056	3.530604	1.6786628	chr4	138528820	138615086
Phyhd1	2.1263378	227696	6.1337857	2.9180758	chr2	30122069	30137668
Gm4673	2.1249516	100043823	5.4115553	2.5761654	chr7	31742428	31746638
Tgfb3	2.1248307	21809	27.327682	13.010046	chr12	87397693	87419991
Snhg12	2.1246104	100039864	17.005503	8.0967455	chr4	131864593	131866939
Arhgap28	2.1220179	268970	16.134882	7.69161	chr17	68192048	68353448
Edn1	2.1208582	13614	15.222596	7.2606864	chr13	42396639	42403358
Zswim7	2.1162891	69747	5.127104	2.4507422	chr11	62080726	62094897
Mettl21d	2.1115835	207965	5.9677896	2.858944	chr12	70678615	70684015
Mpzl1	2.1101825	68481	119.911316	57.483177	chr1	167522312	167564672
Ccdc125	2.1081107	76041	3.6584074	1.7554927	chr13	101439436	101467195
Dctpp1	2.1049867	66422	11.084753	5.326932	chr7	134400476	134404181
Zfp385a	2.1031263	29813	3.0186973	1.45196	chr15	103144326	103170517
Dram1	2.1022153	71712	3.1755912	1.5280858	chr10	87785549	87819820
6230400D17Rik	2.1018658	76133	3.5825412	1.7241963	chr14	21506458	21522321
Stat3	2.0995786	20848	106.507034	51.315243	chr11	100748124	100800825
Dock4	2.0981107	238130	5.2291307	2.521166	chr12	41172640	41573075
Mansc1	2.0978847	67729	7.9436555	3.8303576	chr6	134559225	134582506
Junb	2.0961173	16477	27.464254	13.254176	chr8	87498383	87502617
Yrdc	2.0953276	230734	4.7103686	2.2740674	chr4	124528003	124532486
Bckdha	2.0942988	12039	4.724692	2.2821028	chr7	26414871	26443780
Wisp1	2.0939596	22402	8.053713	3.890703	chr15	66722955	66754761
4933407C03Rik	2.0934587	74440	11.484538	5.549446	chr8	119780919	119985405
Arrdc1	2.089097	215705	10.335138	5.0044684	chr2	24780872	24790801
Hoxd10	2.088475	15430	7.1528206	3.4645636	chr2	74530005	74533159
Sgpl1	2.0845048	20397	28.58598	13.872369	chr10	60561390	60610413
Capg	2.083944	12332	52.084408	25.282616	chr6	72494433	72512974
AB099516	2.083049	554292	4.400298	2.136894	chr15	100183631	100214866
Ppp1r15a	2.082395	17872	11.171804	5.4270105	chr7	52778288	52781638
D16H22S680E	2.0809865	27883	3.2431552	1.5765177	chr16	18300918	18344025
2310009B15Rik	2.079881	69549	8.485234	4.1269174	chr1	140748556	140753431
1110065P20Rik	2.0790892	68920	7.7837605	3.787187	chr4	124526729	124527974
Stard5	2.0762854	170460	9.769857	4.759944	chr7	90780527	90790838
Pcgf5	2.0751958	76073	19.865974	9.683921	chr19	36422944	36530694
2610002I17Rik	2.0732372	72341	3.5802317	1.7468776	chr9	110207696	110224606
Man2a1	2.0694902	17158	119.49841	58.411587	chr17	64950989	65104450
Ager	2.0687017	11596	3.1738086	1.5519701	chr17	34734807	34737877
Entpd4	2.0676906	67464	14.981631	7.3294926	chr14	69955208	69984799
Smagp	2.067401	207818	20.981392	10.266207	chr15	100451771	100467296
Zfp503	2.0648196	218820	36.75234	18.005419	chr14	22803184	22808823
Tm2d1	2.062641	94043	9.016375	4.421898	chr4	98022061	98049956
2410006H16Rik	2.057764	69221	25.835054	12.700304	chr11	62416379	62418308
6030446N20Rik	2.0556893	338363	4.162645	2.048388	chr18	12140448	12279962
Sdr39u1	2.0538123	654795	14.9211645	7.34924	chr14	56516122	56519069
Ddt	2.050175	13202	8.205175	4.0485296	chr10	75233978	75236119
Igf1r	2.0497136	16001	38.713192	19.105835	chr7	75097143	75378553
4933421E11Rik	2.049303	321000	7.1843295	3.5463395	chr3	106487905	106539494
Ccnyl1	2.0479894	227210	15.792639	7.8005924	chr1	64737787	64772216
Sfxn3	2.0469594	94280	46.75981	23.108076	chr19	45122066	45130873
Rnf149	2.046177	67702	4.8281746	2.3869321	chr1	39608144	39634192
Itgb3	2.044997	16416	3.6139596	1.7876854	chr11	104469314	104531785
Foxp1	2.044928	108655	9.307588	4.604258	chr6	98875336	99470987
AB041803	2.0441847	232685	7.088995	3.5080438	chr6	31116026	31168433
Col5a1	2.0419457	12831	28.630213	14.183408	chr2	27741945	27895030
C1rb	2.0417337	667277	19.408518	9.615982	chr6	124520448	124531062
Relb	2.0360878	19698	5.831296	2.897137	chr7	20191571	20214787
Fos	2.0346804	14281	26.540827	13.195281	chr12	86814851	86818219
Il4ra	2.0330267	16190	26.8658	13.367712	chr7	132695796	132722988
Irs2	2.0302334	384783	9.264182	4.615956	chr8	10986964	11008430
Trpv4	2.030036	63873	6.1315055	3.0553682	chr5	115072163	115108430
Tmed5	2.0266893	73130	9.889416	4.936099	chr5	108550666	108561610
Synpo2	2.0238686	118449	3.1089432	1.5539275	chr3	122779437	122939067
Cmpk1	2.0224843	66588	37.20662	18.609531	chr4	114633218	114659833
Rps27	2.0196722	57294	737.01227	369.1428	chr3	90016589	90017570
Map3k8	2.0180478	26410	3.0009167	1.5042602	chr18	4331325	4352951
Sema3f	2.0162544	20350	6.1372876	3.079156	chr9	107583833	107612806
Lpar4	2.0129411	78134	3.7972312	1.9082545	chrX	104115964	104129238
Kctd9	2.0124621	105440	4.6013765	2.3129184	chr14	68334155	68360367
1700029I15Rik	2.0117266	75641	4.9136834	2.4708054	chr2	92223075	92223760
Naglu	2.0116482	27419	5.3508973	2.6907601	chr11	100931191	100938985
Tgtp1	2.0098326	21822	71.24474	35.85862	chr11	48798831	48805756
Dusp23	2.0095935	68440	5.179422	2.6071947	chr1	174560900	174563105
Ctps	2.0085468	51797	13.128669	6.612095	chr4	120212473	120242881
Nhlrc3	2.007069	212114	7.244398	3.6512406	chr3	53255918	53267180
B130024G19Rik	2.0056188	434198	25.016928	12.61787	chr7	77510045	77556032
Ldb2	2.0020885	16826	70.49673	35.61935	chr5	44863372	45190946
Tmem181a	2.0015302	77106	8.625511	4.3593655	chr17	6270475	6305783
2510003E04Rik	2.000874	72320	20.517962	10.373256	chr10	62001374	62041205
Itgav	2.0006306	16410	46.505302	23.514511	chr2	83564554	83647073
