# Supplementary material for: Pathogenic pathways are activated in each major cell type of the glomerulus in the Cd2ap mutant mouse model of focal segmental glomerulosclerosis
Source: BMC Nephrol. 2015 May 13;16:71. doi: 10.1186/s12882-015-0063-z (PMC4430919; doi:10.1186/s12882-015-0063-z)
Supplement: Additional file 5: Table S5. — Functional enrichment analysis of genes with higher expression in Cd2ap mutant mesangial cells. Columns show functional category (molecular function or biological process), name of function, uncorrected P-value, FDR Benjamini and Hochberg corrected P value, Hit count in gene list, Hit count in genome, Genes with hit in gene list. [file 12882_2015_63_MOESM5_ESM.xls]

Gene Symbol	FC WT vs Mutant	Gene ID	WT RPKM	Mut RPKM	Chromosome	Start	End
2210409E12Rik	978.26404	72381	59.76398	0	chr11	88832256	88834345
Ddx3y	458.07843	26900	5.1943254	0.011209568	chrY	597158	623056
Mettl7a2	337.70306	393082	5.3693724	0	chr15	100183631	100192250
Eif2s3y	288.2643	26908	4.614438	0.014781152	chrY	347055	365037
Serpinb1c	262.26312	380839	4.4292536	0.016695252	chr13	32933961	32990009
Gm15698	242.51703	217066	16.770205	0.06835899	chr11	88825981	88828231
Gm14207	138.60919	100043609	4.004735	0	chr2	119146935	119151933
Ephb1	111.47256	270190	16.88478	0.14973629	chr9	101824458	102257023
Hesx1	106.858635	15209	7.4493012	0.068913706	chr14	27813548	27815511
Ky	70.40421	16716	4.171559	0.05857323	chr9	102408468	102448569
Ptger2	58.304207	19217	4.088221	0.06931607	chr14	45607786	45623495
H2-Q1	38.569645	15006	261.17807	6.6940775	chr17	35402729	35462354
Steap4	22.27411	117167	57.92778	2.5709054	chr5	7960472	7982213
Arl9	18.247305	384185	3.0297031	0.1641349	chr5	77433080	77438502
1700016P03Rik	17.97687	668604	5.6680865	0.31168932	chr11	74985977	74991135
Gm3002	14.572411	100040852	6.246556	0.42374915	chr14	3920624	3936392
Tox2	14.340528	269389	8.853531	0.6103105	chr2	163051190	163148838
Gm1337	13.993588	383787	3.2705226	0.23104022	chr2	118524839	118529699
Zmat4	13.590125	320158	16.298996	1.1855973	chr8	24780133	25173577
Hbb-b1	11.461416	15129	10.814974	0.93279624	chr7	110961038	110962437
Glb1l2	11.333403	244757	50.288822	4.3864274	chr9	26570629	26614002
Snord67	10.991502	100217458	5.926606	0.5330264	chr2	91436238	91436335
Ido2	10.710612	209176	23.954033	2.2108743	chr8	25642364	25686805
AI314831	10.2639675	329480	7.493816	0.7217507	chr2	104916695	104966667
Camk2a	10.07939	12322	8.247757	0.80891174	chr18	61085286	61147806
Pgf	9.910255	18654	17.595938	1.7552024	chr12	86507591	86518235
Nkain2	9.618583	432450	9.618605	0.9885546	chr10	31409125	32609721
Ostb	9.2083435	330962	3.390126	0.36394343	chr9	65260560	65270580
Slc16a7	9.086102	20503	4.98554	0.54241794	chr10	124664541	124765591
Zfp54	8.849852	22712	3.1768987	0.35486808	chr17	21560191	21572348
Gm13778	8.821556	100503288	3.9281235	0.4401893	chr2	90884249	90894077
Dlgap1	7.8589425	224997	3.493124	0.4393892	chr17	70318708	71170753
BC051226	7.831967	407803	3.7291162	0.47068962	chr17	34045128	34046123
AB124611	7.823	382062	6.890606	0.8707303	chr9	21330621	21349775
Arsi	7.5552154	545260	7.9869	1.0450352	chr18	61071894	61077422
Ovca2	7.409064	246257	5.415712	0.72258955	chr11	74989445	74992815
Mir374	7.284368	751546	3.646582	0.4948729	chrX	100768399	100768493
Dll4	7.1629944	54485	3.652323	0.50405055	chr2	119151520	119161402
Hrsp12	7.091752	15473	3.0160067	0.4204152	chr15	34413777	34425001
Postn	6.948805	50706	6.017602	0.8560776	chr3	54165029	54194963
Kctd21	6.8477545	622320	4.7467146	0.68524283	chr7	104480833	104498726
Gdf11	6.8135195	14561	13.671846	1.9836057	chr10	128321602	128328774
Robo2	6.758743	268902	5.8575435	0.85674006	chr16	73892551	74411157
Vill	6.3524857	22351	7.078437	1.1015217	chr9	118961896	118980643
Gm7092	6.1388264	632778	21.573376	3.4740202	chr7	26399640	26400911
Tmem182	6.0253954	381339	65.949905	10.820025	chr1	40862446	40912112
Nphs2	5.460091	170484	3.3419244	0.605057	chr1	158240866	158258166
Ppp1r26	5.4467077	241289	3.0269449	0.5493764	chr2	28303461	28311028
Plcb2	5.276865	18796	12.352629	2.3141048	chr2	118533253	118554174
Serpinb1a	5.2720537	66222	19.425781	3.6424901	chr13	32933961	32943054
Gm5129	5.2533174	332993	3.2224755	0.6063949	chr5	30061874	30062476
Cdh2	5.1742363	12558	4.795051	0.91610795	chr18	16747386	16967558
Mrc1	5.059584	17533	131.31161	25.65594	chr2	14151041	14253650
Snrnp25	5.0178084	78372	3.1868818	0.62784356	chr11	32105415	32108995
LOC100416360	4.9153843	100416360	4.225087	0.8497237	chr17	36248374	36254068
Coil	4.891702	12812	9.90567	2.0018125	chr11	88831732	88852927
Top2a	4.855787	21973	4.0785685	0.83032435	chr11	98854261	98885503
Myl4	4.8556566	17896	4.4958563	0.9153011	chr11	104411977	104448533
Sned1	4.8120327	208777	14.431303	2.964672	chr1	95132474	95193025
Ccdc80	4.763978	67896	120.13841	24.92939	chr16	45093789	45128037
Rasl12	4.629344	70784	28.833311	6.15708	chr9	65246295	65262660
Pdp2	4.5376935	382051	18.271618	3.9805338	chr8	107115368	107120749
Zfp804a	4.5273523	241514	6.409212	1.3994582	chr2	81893815	82100035
Gm14378	4.4878864	100044509	3.4259424	0.7546365	chr8	4248214	4251423
Fras1	4.4254684	231470	6.537677	1.4603724	chr5	96802974	97213747
Nod2	4.3550844	257632	3.4028337	0.77240264	chr8	91171246	91212373
Cox4i2	4.3517575	84682	8.217624	1.8667289	chr2	152579909	152590773
Ccbl2	4.3378196	229905	8.10628	1.8473518	chr3	142364044	142407874
Fam171b	4.33066	241520	4.233581	0.9663922	chr2	83652885	83721515
Pdgfc	4.2898335	54635	15.459399	3.5624735	chr3	80840338	81017953
Ano1	4.2873755	101772	138.41159	31.913937	chr7	151774556	151924448
Nrgn	4.235734	64011	26.9366	6.2865705	chr9	37352078	37360330
Fgfr2	4.2228656	14183	56.584835	13.246226	chr7	137305965	137410322
Aurkb	4.1954327	20877	3.2364683	0.7625954	chr11	68859145	68865164
Abat	4.1751986	268860	24.974674	5.9131975	chr16	8513522	8621660
Cenpa	4.11879	12615	3.9255528	0.9421731	chr5	30969275	30977199
Fdps	4.0847297	110196	10.252112	2.481131	chr3	88897510	88905867
Ubash3b	4.054247	72828	4.8970256	1.194048	chr9	40821724	40965577
Fam101a	4.0198765	73121	3.0806813	0.7575888	chr5	125483845	125492917
Tspan15	4.014288	70423	41.532787	10.227799	chr10	61648144	61693966
Morn2	3.9951866	378462	3.389342	0.8386446	chr17	80689552	80696814
Nme3	3.9885645	79059	29.436625	7.2957673	chr17	25033445	25034474
Gdf10	3.9797287	14560	250.73119	62.280838	chr14	34736773	34748468
Leo1	3.9731677	235497	15.423337	3.837435	chr9	75289331	75314239
Ctxn3	3.9730864	629147	3.7453313	0.93188375	chr18	57628140	57637788
Sh3bp2	3.9388425	24055	14.026118	3.5202081	chr5	34868433	34906288
1700066O22Rik	3.8624897	74916	3.0675151	0.78508925	chr18	57533109	57712051
Myl6b	3.818406	216459	4.1848664	1.0834256	chr10	127931213	127935741
Wdr66	3.766356	269701	3.9718916	1.042499	chr5	123721604	123776803
Pcp4l1	3.7257614	66425	226.5914	60.12122	chr1	173103395	173127166
Ptn	3.6985335	19242	1000.96564	267.54022	chr6	36665663	36761361
Rcc1	3.6799371	100088	3.5852883	0.9631264	chr4	131887834	131901665
Cend1	3.6696641	57754	6.5055346	1.752493	chr7	148612350	148615319
Ltbp4	3.648038	108075	9.477751	2.5682983	chr7	28090160	28122631
Id1	3.6433194	15901	10.331755	2.8033445	chr2	152562010	152563146
1810011O10Rik	3.6146815	69068	133.8429	36.603672	chr8	25548088	25549418
Ucp2	3.5994475	22228	54.218803	14.890652	chr7	107641854	107650682
Leng9	3.5794168	243813	3.689944	1.0190772	chr7	4099785	4101474
Poll	3.5778317	56626	3.967386	1.0961853	chr19	45626766	45635033
Pth1r	3.5751035	19228	23.043201	6.3716745	chr9	110624589	110649649
Bcas1	3.55483	76960	3.8905904	1.0819229	chr2	170172491	170253345
Ppp1r3c	3.5493214	53412	3.8898015	1.0833821	chr19	36806221	36811094
Ndufa4l2	3.5326135	407790	90.4391	25.308117	chr10	126951995	126954210
Pbk	3.4902132	52033	3.0252492	0.8568578	chr14	66424748	66436659
Sfrp2	3.4719927	20319	1783.6503	507.8441	chr3	83570243	83578236
Rassf4	3.4647777	213391	5.1125846	1.4586955	chr6	116583026	116623854
Npas2	3.444401	18143	13.614411	3.9073713	chr1	39251117	39420085
Piga	3.432652	18700	4.8511786	1.3970668	chrX	160857719	160871847
Gpr155	3.4233453	68526	5.570375	1.6085452	chr2	73179564	73224455
Akr1b7	3.419783	11997	22.478504	6.4978337	chr6	34362362	34373137
Capn5	3.4196837	12337	11.718496	3.3875484	chr7	105270075	105326703
Ccna2	3.4187524	12428	4.1873884	1.2108074	chr3	36463787	36470918
Camsap3	3.4008343	69697	3.1038098	0.9022136	chr8	3587450	3609075
Rasl11b	3.371546	68939	44.710712	13.109374	chr5	74591351	74595502
Pon3	3.3439877	269823	23.38354	6.9126606	chr6	5170852	5206233
B4galt4	3.3355255	56375	14.82073	4.3924294	chr16	38742377	38769158
E030013I19Rik	3.3319225	338535	23.181206	6.8776603	chr2	12222948	12233942
Fam65b	3.3220017	193385	8.192101	2.4377825	chr13	24706479	24825675
Lcat	3.3045852	16816	4.7539515	1.4221238	chr8	108463451	108467302
Ppfia2	3.2294297	327814	6.263472	1.9172949	chr10	105907395	106369573
Add3	3.2165954	27360	20.069717	6.1679997	chr19	53214935	53321889
Lrrc17	3.2149224	74511	30.943947	9.514914	chr5	21049345	21081720
Dus4l	3.2149034	71916	4.1288238	1.2695737	chr12	32324920	32339691
Flywch2	3.212094	76917	8.782639	2.7029397	chr17	23913885	23923044
Wdr54	3.2045968	75659	4.3302913	1.3358054	chr6	83102704	83106373
Mboat1	3.1975262	218121	8.870365	2.7423756	chr13	30228359	30338563
Gm10499	3.18699	69717	4.7965207	1.4878023	chr17	36278694	36282689
Gpd2	3.180531	14571	4.334352	1.3471751	chr2	57090089	57223130
Gm5918	3.1742089	546143	6.761393	2.1057181	chr9	72827533	72833183
Paqr6	3.1732187	68957	6.981445	2.1749277	chr3	88168511	88172463
D3Ertd751e	3.1609035	73852	3.3980305	1.0627122	chr3	41546540	41562861
Abi3	3.1550553	66610	15.958107	5.0000467	chr11	95691386	95703790
Prelp	3.1346512	116847	12.669299	3.9954245	chr1	135806882	135817978
Pard6g	3.1250947	93737	34.970955	11.062257	chr18	80243634	80316379
Nudt2	3.1163974	66401	4.499437	1.4272662	chr4	41412181	41427959
Abcc9	3.1144657	20928	19.888504	6.312743	chr6	142536382	142650794
Gpr20	3.108909	239530	3.0692098	0.97592866	chr15	73525037	73537935
Snora21	3.107389	100302498	4.156758	1.3223871	chr11	97642953	97643080
Slc22a23	3.1055536	73102	15.669381	4.9878383	chr13	34271027	34437051
Nudt14	3.0999236	66174	12.722227	4.0570636	chr12	114172944	114180329
Icam2	3.0770924	15896	71.51043	22.973576	chr11	106238970	106243955
Dhcr7	3.068476	13360	9.527623	3.069456	chr7	151009072	151034315
Blmh	3.0658846	104184	130.62428	42.118008	chr11	76759158	76800891
Pdf	3.0557005	68023	4.631876	1.4984621	chr8	109568969	109572514
Mterfd2	3.045387	69821	29.374136	9.535036	chr1	95195788	95202447
Hyi	3.0363123	68180	10.823906	3.524011	chr4	118032619	118035349
Pomt1	3.0292284	99011	8.712615	2.843257	chr2	32092203	32110525
Tfb1m	3.0215797	224481	4.0648546	1.3298742	chr17	3519256	3557713
Slc22a17	3.0126579	59049	5.0570436	1.6593825	chr14	55525141	55531969
Ccdc111	3.0115588	408022	3.3757627	1.1081033	chr8	47660948	47702554
Ccl27a	2.9999084	20301	6.4597774	2.1286736	chr4	41716343	41721049
Apobec1	2.9962945	11810	17.139702	5.654813	chr6	122527810	122552462
Tbc1d30	2.9889317	74694	7.6127195	2.5178127	chr10	120700876	120748245
Ckb	2.984811	12709	130.09634	43.087166	chr12	112907566	112910549
4930511M06Rik	2.975379	75084	46.40407	15.417478	chr18	57705015	57712051
Cacna1a	2.9696844	12286	4.2755556	1.4232526	chr8	86912340	87164148
Snta1	2.9653533	20648	8.60821	2.869697	chr2	154202050	154233820
Tram1l1	2.9602325	229801	5.31023	1.7733195	chr3	124023955	124026178
Zfp784	2.9538338	654801	9.6334915	3.2240148	chr7	4986048	4990048
Car11	2.9523406	12348	5.474299	1.8329964	chr7	52955337	52960031
Gm889	2.9379165	380755	6.195727	2.084742	chr12	40902973	40925902
Sqle	2.923616	20775	7.315707	2.4736345	chr15	59146647	59162748
Mapt	2.9101968	17762	24.584707	8.351072	chr11	104092750	104193407
Ccnd2	2.9009948	12444	10.635053	3.6240356	chr6	127075727	127101066
Cntnap1	2.8714683	53321	4.669744	1.6076394	chr11	101037431	101052034
Pank1	2.8639548	75735	3.528845	1.2180521	chr19	34885384	34953945
Rasgef1a	2.846676	70727	7.8771696	2.7354681	chr6	117961558	118041564
Nob1	2.84435	67619	4.0623097	1.4118538	chr8	109936389	109948938
Rab6b	2.842216	270192	161.4903	56.16802	chr9	103014404	103087600
Zfp647	2.8369741	239546	3.4248357	1.1933947	chr15	76740800	76755878
Fbxo10	2.8351903	269529	6.276818	2.188553	chr4	45047120	45097476
Rrad	2.8257565	56437	19.661524	6.878315	chr8	107151966	107155221
Rab3c	2.8147461	67295	3.725519	1.3084204	chr13	110844396	111071204
Mcm5	2.8089952	17218	3.0766532	1.0827471	chr8	77633427	77652338
Ndn	2.8068774	17984	4.401976	1.5503287	chr7	69493163	69494813
Arid3b	2.806855	56380	3.1200826	1.0988678	chr9	57638316	57684600
Aldh1a3	2.8036163	56847	3.6361387	1.2820983	chr7	73535779	73572363
Mvk	2.8030493	17855	7.150485	2.521763	chr5	114894315	114910599
A230065H16Rik	2.7950516	380787	3.0235834	1.0693792	chr12	112645020	112650288
Stard4	2.7893832	170459	4.1781683	1.4807343	chr18	33361075	33373470
Serpini1	2.7799456	20713	41.03296	14.591375	chr3	75361455	75446445
Akr7a5	2.7748792	110198	4.8410654	1.7246315	chr4	138866659	138874701
Dmpk	2.7561421	13400	22.8712	8.20327	chr7	19669198	19679169
Syne1	2.74746	64009	10.652966	3.833001	chr10	4795059	5326342
Slc9a3r2	2.7407048	65962	183.62619	66.232605	chr17	24776227	24787250
Trpc6	2.7255664	22068	7.340739	2.662457	chr9	8544142	8680741
Mblac1	2.7252295	330216	4.106864	1.4897279	chr5	138635542	138636628
Pygm	2.723778	19309	58.80016	21.340593	chr19	6384429	6398459
Ncf2	2.7121158	17970	22.588861	8.233525	chr1	154654387	154684120
Slc25a35	2.700875	71998	39.633682	14.506396	chr11	68781633	68786017
Tlr12	2.699687	384059	5.7695937	2.1126688	chr4	128292690	128295863
Hspa12a	2.6937714	73442	102.54239	37.630684	chr19	58870241	59018144
Mmp16	2.6874733	17389	3.7355363	1.374069	chr4	17780040	18045881
Bcdin3d	2.6873162	75284	3.056783	1.1244634	chr15	99300515	99305161
Plxnb1	2.68473	235611	35.88143	13.212006	chr9	108997950	109022429
Kcnj5	2.6675723	16521	21.856731	8.099692	chr9	32122368	32151822
Obsl1	2.6668334	98733	6.310306	2.339128	chr1	75482400	75503027
Zfp708	2.6665294	432769	3.2916424	1.220298	chr13	67170334	67209540
Mir215	2.6597068	387211	3.0281925	1.1255101	chr1	187136066	187137682
Stmn1	2.6564229	16765	25.871237	9.62763	chr4	134024235	134029758
Cd34	2.647367	12490	287.94516	107.52149	chr1	196765015	196787486
Mki67	2.6454637	17345	6.541763	2.444514	chr7	142881471	142908062
Ldlr	2.6450353	16835	17.24762	6.4461074	chr9	21528038	21554362
Hscb	2.644349	100900	13.154559	4.9176464	chr5	111258089	111268796
Pdgfd	2.62341	71785	18.733294	7.05907	chr9	6168612	6377519
Hist1h2bm	2.6207087	319186	13.985563	5.275466	chr13	21813967	21814347
Kcnrg	2.61353	328424	11.941526	4.516811	chr14	62226294	62231670
Ehd3	2.612321	57440	443.9735	168.00801	chr17	74154181	74181433
Zfp697	2.5942004	242109	8.420838	3.208863	chr3	98186404	98557735
Itpa	2.5916688	16434	9.4044285	3.5871766	chr2	130493577	130507350
Usp11	2.5906737	236733	9.942768	3.7939734	chrX	20281035	20297665
Slc2a10	2.5887802	170441	4.9485173	1.8896424	chr2	165329478	165345411
Ache	2.5856009	11423	43.59076	16.666048	chr5	137728994	137735691
Hist1h2ak	2.5805807	319169	11.107026	4.2548065	chr13	21845304	21845696
Raver2	2.568012	242570	3.503051	1.3484931	chr4	100741643	100824975
Idi1	2.5623994	319554	7.469964	2.881849	chr13	8884852	8891642
Efnb1	2.5602033	13641	29.629814	11.4407425	chrX	96331469	96344330
2010320M18Rik	2.552663	72093	7.0611763	2.7345328	chr8	73300761	73301505
Efnb2	2.5514972	13642	176.76424	68.48555	chr8	8617439	8660773
Nfil3	2.5492845	18030	5.125702	1.9876262	chr13	53062578	53076408
Aldh4a1	2.545844	212647	3.4110715	1.3245206	chr4	139178809	139205606
Mcee	2.5430017	73724	19.090666	7.421199	chr7	71537657	71557005
Tpx2	2.536558	72119	3.127043	1.218677	chr2	152673700	152721057
Fads2	2.529129	56473	3.1769488	1.2417634	chr19	10138654	10175993
Rtn4ip1	2.5289242	170728	7.6924834	3.006977	chr10	43621613	43667668
Fkbp4	2.5240026	14228	73.23279	28.682388	chr6	128380125	128388649
Trpc4	2.518055	22066	23.486343	9.220405	chr3	53960026	54122392
Nr3c2	2.514871	110784	7.1725273	2.8193955	chr8	79426407	79767538
9130023H24Rik	2.5121694	100043133	5.9759116	2.3515544	chr7	135377965	135381545
Ehd4	2.50413	98878	120.10755	47.4147	chr2	119915223	119980311
Cpne2	2.4984536	234577	56.07626	22.187445	chr8	97056928	97094429
H2-M3	2.4946685	14991	7.624248	3.0212297	chr17	37407179	37411430
Nthl1	2.4936159	18207	7.008023	2.7782123	chr17	24769627	24775783
Ppp1r35	2.4902792	69871	8.598906	3.4134579	chr5	138220146	138221335
Mad1l1	2.484443	17120	4.912316	1.9545951	chr5	140484643	140797506
Ceacam1	2.48029	26365	4.378567	1.7451357	chr7	26246721	26274511
Cdca7l	2.4780774	217946	16.756058	6.6843066	chr12	119082334	119117179
Mtap6	2.4686565	17760	7.179417	2.8749344	chr7	106415957	106485647
Pigy	2.4618561	66459	3.087548	1.239798	chr6	57605030	57642072
Angptl2	2.459153	26360	64.78025	26.04094	chr2	33071481	33103234
Mycn	2.4542422	18109	14.355366	5.7822413	chr12	12942899	12948642
Gsdmd	2.4477305	69146	10.691087	4.3177543	chr15	75692769	75697834
Dapp1	2.447077	26377	16.366915	6.6117854	chr3	137593970	137644513
Klhdc5	2.4458284	232539	9.719157	3.9282775	chr6	147039597	147061300
Zdhhc24	2.441112	70605	9.991262	4.046059	chr19	4878668	4885397
Wbscr17	2.4368863	212996	23.212986	9.41663	chr5	131350821	131783392
Sdhaf1	2.4360785	68332	18.037632	7.319605	chr7	31106428	31107394
Tal2	2.4322417	21350	7.9765344	3.241956	chr4	53792577	53799757
Zfp420	2.4308386	233058	3.6554477	1.486565	chr7	30644998	30662321
Arhgef15	2.4306796	442801	40.798138	16.592514	chr11	68756656	68770360
AU022252	2.4305751	230696	5.308015	2.1588511	chr4	118897743	118905329
4930523C07Rik	2.4281485	67647	62.586845	25.480469	chr1	161974511	162008717
Inpp5b	2.4238539	16330	86.24042	35.172554	chr4	124419122	124478755
Meox1	2.4096396	17285	5.5418115	2.273522	chr11	101738824	101755668
Cryab	2.4037526	12955	67.81577	27.889475	chr9	50559430	50564738
Sdc1	2.389139	20969	52.531483	21.735912	chr12	8778202	8800493
Gstk1	2.379121	76263	7.381934	3.0672781	chr6	42195934	42200440
BC017158	2.3767483	233913	15.916363	6.620033	chr7	135414893	135441645
Lphn3	2.376547	319387	28.43017	11.825857	chr5	81449596	82224755
Tbx3	2.376087	21386	86.15311	35.84333	chr5	120120678	120134610
Abtb2	2.3712447	99382	8.072212	3.3652377	chr2	103406467	103558580
Nat14	2.3704228	269854	6.1248217	2.5542715	chr7	4873853	4876608
0610007P14Rik	2.3697953	58520	25.423016	10.605128	chr12	87156405	87165495
2810405K02Rik	2.3685994	66469	10.392294	4.3373	chr4	154270539	154273152
Ccdc46	2.3679068	76380	83.38741	34.81253	chr11	108286580	108721929
Asrgl1	2.3565779	66514	9.556783	4.00894	chr19	9186209	9210056
C1rl	2.3538642	232371	9.802978	4.1169558	chr6	124443131	124460661
Ift80	2.3522341	68259	3.30492	1.3889289	chr3	68696421	68808492
1190002F15Rik	2.3476725	381822	3.8445485	1.6188527	chr6	134879110	134901588
Rgl1	2.3436713	19731.chr1.1	249.0388	105.04363	chr1	154364660	154472241
Arntl	2.343425	11865	6.2240143	2.625543	chr7	120350979	120457636
Psmg3	2.3374593	66506	9.972463	4.217529	chr5	140299548	140302797
Cdk5rap1	2.33421	66971	3.06521	1.2981349	chr2	154161122	154198455
Pygo1	2.3330512	72135	8.580284	3.6356063	chr9	72773457	72793822
Frem2	2.3326325	242022	16.008778	6.7843976	chr3	53317860	53461277
Klf2	2.3264468	16598	15.476967	6.57646	chr8	74842961	74845553
Ebp	2.3239276	13595	6.0292516	2.5647235	chrX	7762457	7770638
Alg14	2.3229816	66789	24.022552	10.222873	chr3	120994735	121064929
Gm5820	2.3227925	545253	3.5958233	1.5303385	chr18	39052110	39130928
Pex6	2.3219683	224824	14.61198	6.220887	chr17	46848412	46862490
Limk1	2.3211486	16885	4.977231	2.1197493	chr5	135131909	135164460
Ubiad1	2.3161614	71707	5.934034	2.5326831	chr4	147808606	147818860
D17Wsu104e	2.3160312	28106	37.846107	16.153868	chr17	56315964	56323343
Mustn1	2.314753	66175	65.6175	28.022997	chr14	31692443	31694796
Ogfrl1	2.3134108	70155	3.3130076	1.4156935	chr1	23373263	23390014
Plxna3	2.3129451	18846	3.304953	1.4125358	chrX	71574405	71590028
Rabl5	2.3125477	67286	12.290939	5.254049	chr5	137384020	137389114
Des	2.311782	13346	353.70663	151.25024	chr1	75356919	75364290
Ptprb	2.3105383	19263.chr10.2	23.663969	10.12451	chr10	115712579	115826594
B230217C12Rik	2.3078487	68127	11.025779	4.72282	chr11	97702094	97704357
Gadd45gip1	2.2970798	102060	6.8905463	2.965358	chr8	87356181	87359381
Fdft1	2.2910163	14137	7.476042	3.2258422	chr14	63763988	63798415
Akr1c13	2.288785	27384	6.110951	2.6393893	chr13	4190433	4204849
BC037034	2.2873118	231807	7.947794	3.4349513	chr5	138700886	138705280
Aven	2.283384	74268	3.1412547	1.3599526	chr2	112333121	112471410
Prmt7	2.2796295	214572	3.388719	1.4695047	chr8	108734954	108775594
Mob3b	2.2732663	214944	8.226906	3.5775511	chr4	34899953	35104715
Mylk4	2.2729433	238564	6.775543	2.946831	chr13	32792696	32873648
Stk10	2.2715464	20868	22.766182	9.907592	chr11	32433266	32524595
Bcam	2.2707644	57278	151.45035	65.93223	chr7	20341487	20355881
Neurl1b	2.268154	240055	13.174566	5.742001	chr17	26551910	26583287
Rcan2	2.264506	53901	255.58025	111.57157	chr17	43938800	44176465
Kcnd3	2.2634943	56543	54.97833	24.011076	chr3	105255248	105476920
Ndufc1	2.262905	66377	51.72355	22.595484	chr3	51209401	51212877
Pomt2	2.2601616	217734	5.971806	2.6119556	chr12	88447816	88488852
Gm20309	2.2547104	100504603	45.15251	19.796598	chr1	60540347	60542727
Klhl25	2.2538774	207952	8.426483	3.695861	chr7	82993224	83019016
Ephx3	2.251378	71932	3.9478126	1.7334355	chr17	32320715	32326494
Mettl16	2.2504027	67493	10.607858	4.6598	chr11	74584365	74632194
Itga4	2.2503045	16401	85.558716	37.585674	chr2	79095583	79173271
Sirt4	2.2482445	75387	4.0238924	1.7693037	chr5	115928019	115934493
Tmem186	2.2347593	66690	3.0940595	1.3686657	chr16	8633824	8637794
Rsph1	2.2296135	22092	3.4645853	1.536106	chr17	31391965	31414301
Abca6	2.2254875	76184	4.301229	1.9105883	chr11	110038136	110113090
Mllt11	2.2247713	56772	4.269775	1.8972272	chr3	95022466	95032599
Wt1	2.2242286	22431	34.334835	15.260019	chr2	104966686	105013771
Zfp324	2.223864	243834	4.4582033	1.9817616	chr7	13551213	13559171
Rnaseh2c	2.2130735	68209	34.235443	15.292547	chr19	5601873	5602959
Pet112l	2.2070887	229487	3.9498744	1.7691429	chr3	85378051	85458392
Rgma	2.1999652	244058	23.924383	10.750402	chr7	80520406	80564785
Sema5a	2.1996644	20356	88.22941	39.65124	chr15	32174568	32626096
Cbr4	2.1985347	234309	5.4652386	2.4573977	chr8	63966531	63982297
Ccdc94	2.198127	72886	3.8012698	1.7095248	chr17	56098610	56107374
Pdia6	2.197342	71853	32.922543	14.811371	chr12	17273401	17291576
Tbxa2r	2.197037	21390	24.271618	10.920959	chr10	80791476	80797917
Itga8	2.1941137	241226	667.0777	300.54984	chr2	12028287	12223547
Hdac9	2.192822	79221.chr12.2	9.339103	4.2101846	chr12	34780742	35601767
Twf2	2.1896627	23999	10.997819	4.9651103	chr9	106105439	106117718
Art3	2.1893096	109979	129.11374	58.2995	chr5	92760867	92843653
1520402A15Rik	2.1848602	68075	4.1261516	1.8668997	chr4	115809333	115817221
Fahd1	2.1846328	68636	3.2408333	1.4664856	chr17	24985841	24987247
Tnfrsf22	2.1829994	79202	4.599924	2.0830345	chr7	150822630	150835543
Dem1	2.1824837	73172	9.406876	4.2608256	chr4	120593807	120597610
Gm20346	2.1808417	100504674	11.993121	5.4363523	chr9	62189310	62191841
2810002D19Rik	2.1790247	66457	5.557474	2.5212436	chr2	94246864	94251837
Tek	2.1752605	21687	46.654606	21.202301	chr4	94405991	94541630
Ip6k2	2.1751986	76500	12.215725	5.5516243	chr9	108686127	108708664
Olfr558	2.1742282	259097	12.89805	5.86433	chr7	109850837	109860568
Rmi1	2.1670067	74386	22.374445	10.206848	chr13	58503609	58512510
Npy1r	2.166239	18166	25.304613	11.547627	chr8	69221321	69230697
Rap2a	2.1606486	76108	180.33444	82.50762	chr14	120877683	120906414
Zfp108	2.1606257	54678	4.042909	1.8497543	chr7	25039813	25047463
Cby1	2.1582634	73739	12.821243	5.872532	chr15	79489657	79498090
B130055M24Rik	2.155248	654803	4.385583	2.0115442	chr7	134592150	134604750
Fancl	2.1547723	67030	3.8363612	1.7600199	chr11	26287084	26371876
Sdf2l1	2.1545842	64136	14.539698	6.671008	chr16	17130231	17132476
Cks1b	2.151141	54124	11.035103	5.0711584	chr3	89219394	89222213
Naf1	2.1477983	234344	4.594751	2.1147945	chr8	69384116	69414463
Plxdc2	2.147432	67448	55.872902	25.720615	chr2	16277949	16673742
Etnk1	2.1472034	75320	17.143564	7.892736	chr6	143115750	143157066
Tnfrsf18	2.1468027	21936	3.4737136	1.5995637	chr4	155400451	155403000
Zfp27	2.14335	22689	4.2283144	1.9501758	chr7	30678356	30691123
Dcun1d2	2.1431634	102323	6.336942	2.922968	chr8	13255963	13288126
Cd200	2.1426961	17470	25.117655	11.588258	chr16	45382248	45409166
Msh6	2.1392584	17688	5.556435	2.5676317	chr17	88374390	88390232
Smarcal1	2.1389134	54380	5.1511264	2.3807209	chr1	72629825	72683364
Elac2	2.1375782	68626	5.0896554	2.35378	chr11	64792537	64815578
Taf5	2.1375592	226182	5.3489413	2.473712	chr19	47142238	47157969
Dnmt1	2.13637	13433	11.48129	5.312681	chr9	20711650	20764332
Tufm	2.1355171	233870	15.576532	7.2105308	chr7	133630869	133634245
C2cd3	2.134604	277939	4.179712	1.9356582	chr7	107520743	107618668
Irs1	2.1315863	16367	26.570631	12.322488	chr1	82229680	82288014
Mettl4	2.13043	76781	4.4490356	2.0644205	chr17	95126420	95149359
Xrcc5	2.130349	22596	5.0467505	2.3418586	chr1	72353995	72441527
Snrpd3	2.1299088	67332	25.569166	11.867392	chr10	74980787	74998185
Ndufaf4	2.1295648	68493	4.043871	1.8771807	chr4	24825230	24832148
S1pr1	2.1294668	13609	16.08291	7.4660907	chr3	115413351	115417973
Serp2	2.1280603	72661	7.976476	3.705329	chr14	76932619	76956696
Prmt2	2.1240625	15468	11.821219	5.501669	chr10	75669967	75700610
Stbd1	2.1156898	52331	54.086555	25.27184	chr5	93032077	93035605
Dis3l	2.1151402	213550	4.898903	2.2895968	chr9	64154563	64189064
Gucy1a3	2.109584	60596	191.61696	89.79179	chr3	81896349	81949799
Apcdd1	2.1094084	494504	25.570358	11.983281	chr18	63081981	63113456
Tmem141	2.1083302	51875	3.3950202	1.5918545	chr2	25475586	25477525
Fam173b	2.1027546	68073	4.394629	2.0660136	chr15	31531871	31547290
Sntb1	2.1023188	20649	35.922264	16.891365	chr15	55470709	55738504
Gja4	2.100638	14612	32.542255	15.314262	chr4	126988665	126991222
Ubxn2b	2.0992427	68053	7.4431324	3.505036	chr4	6118252	6146935
8430427H17Rik	2.0945342	329540	8.930314	4.2148194	chr2	153233197	153355707
Gprasp2	2.0938537	245607	3.5451677	1.673748	chrX	132373573	132379269
Gtf2h3	2.093797	209357	5.4007316	2.549867	chr5	125029157	125047689
Ccdc123	2.093532	72140	4.2373996	2.0008733	chr7	36182112	36223703
Plk1s1	2.0924182	228730	35.111813	16.588396	chr2	146681625	146795825
Ccdc163	2.0910404	68394	6.1884823	2.9256427	chr4	116381176	116387709
Naaa	2.089421	67111	3.3382897	1.57942	chr5	92686686	92707207
Stoml1	2.0879002	69106	6.679596	3.1625693	chr9	58100971	58111016
Cspg4	2.087228	121021	43.454243	20.580776	chr9	56712911	56747677
Hspa1b	2.0853775	15511	74.58381	35.35571	chr17	35093374	35096183
Entpd1	2.0840943	12495	17.82376	8.454377	chr19	40686887	40816092
Pvrl2	2.074724	19294	28.194927	13.434149	chr7	20301993	20334922
Tchp	2.074323	77832	3.8659859	1.8423985	chr5	115157788	115172336
Fzd8	2.0725677	14370	5.016338	2.392642	chr18	9212854	9216199
Iqce	2.0714254	74239	4.0080237	1.9127601	chr5	141139459	141178332
Spr	2.071237	20751	8.665175	4.1356807	chr6	85083674	85087758
Khdrbs3	2.0637662	13992	35.02648	16.777824	chr15	68758850	68931641
Wdr11	2.061808	207425	9.017469	4.323504	chr7	136735377	136779252
Wdr8	2.0594993	59002	6.21986	2.9855106	chr4	153516481	153542372
Ada	2.0589955	11486	3.1362095	1.5057378	chr2	163552320	163575913
5730419I09Rik	2.0570474	74741	6.750479	3.244068	chr6	142959440	143048627
Zscan22	2.056358	232878	7.3212295	3.5195315	chr7	13483164	13493588
Metrnl	2.056343	210029	10.996096	5.2861867	chr11	121563741	121578703
Tubg2	2.055493	103768	3.8671103	1.8598167	chr11	101017198	101023101
Hs3st3b1	2.0553498	54710	175.49889	84.40888	chr11	63698195	63735786
Gpr81	2.0538774	243270	70.19563	33.785862	chr5	124326745	124330029
Mmaa	2.0486643	109136	3.9195135	1.8913023	chr8	81790323	81818855
Tet1	2.0430932	52463	5.482416	2.6526713	chr10	62267318	62342762
Gm17586	2.039603	100504040	3.5964792	1.7431371	chr11	120495082	120496439
Dgkb	2.036431	217480	31.168367	15.130169	chr12	38606761	39359997
Cdkl5	2.036306	382253	4.6749372	2.269511	chrX	157222240	157432613
Dlg4	2.0354593	13385	13.232453	6.4265447	chr11	69832107	69859033
Hist2h2be	2.034117	319190	19.676311	9.5624075	chr3	96025044	96027661
Acad11	2.0310037	102632	4.146503	2.0182314	chr9	103942952	104029976
Vldlr	2.0290713	22359	4.976762	2.4246507	chr19	27291510	27328721
Coq5	2.018292	52064	21.013325	10.292253	chr5	115729711	115746981
Tcof1	2.0154083	21453	9.124005	4.4752994	chr18	60973410	61008618
Mesdc1	2.007233	80889	5.321181	2.6206553	chr7	91029005	91032851
Rem1	2.007136	19700	8.88494	4.376	chr2	152452744	152463732
Tstd1	2.0062454	226654	3.322768	1.637252	chr1	173349164	173350483
Mrpl15	2.005473	27395	4.88142	2.406185	chr1	4763279	4775807
BC005624	2.0014708	227707	35.583534	17.575169	chr2	30828353	30837461
