# Supplementary material for: Pathogenic pathways are activated in each major cell type of the glomerulus in the Cd2ap mutant mouse model of focal segmental glomerulosclerosis
Source: BMC Nephrol. 2015 May 13;16:71. doi: 10.1186/s12882-015-0063-z (PMC4430919; doi:10.1186/s12882-015-0063-z)
Supplement: Additional file 6: Table S6. — Functional enrichment analysis of genes with higher expression in wild type mesangial cells. Columns show functional category (molecular function or biological process), name of function, uncorrected P-value, FDR Benjamini and Hochberg corrected P value, Hit count in gene list, Hit count in genome, Genes with hit in gene list. Note much lower P values compared to genes upregulated in mutant mesangial cells. [file 12882_2015_63_MOESM6_ESM.xls]

Category	Name	p-value	q-value FDR B&H	Hit Count in Query List	Hit Count in Genome	Hit in Query List
GO: Molecular Function	receptor binding	1.13E-06	6.55E-04	64	1341	"PPARG,DOCK4,FGF13,CEBPB,GDF6,FKBP1B,FIGF,ADM,F2RL1,F2R,HLA-B,ANG,MBL2,IL6R,UCHL1,COL5A1,IGF1R,COL3A1,CCL17,CCL4,CCL2,CXCL9,ANGPT4,ADAM22,LRIF1,ICAM1,TGFBI,TGFB2,TGFB3,THBS1,KDR,RERG,HMGN3,GNAL,OGN,ITGB3,ITGAV,DIAPH1,BMP4,SERPINE1,BMP2,ITGA6,CXCL10,EDN1,EDNRB,ARRDC3,HILPDA,PXDN,IRS2,TNFSF8,CD9,PTCH2,CD4,LAMA2,TSLP,SPP1,CXCL1,NGF,CDH5,LAG3,FBLN5,EHHADH,STAT3,CD74"
GO: Molecular Function	growth factor binding	2.08E-06	6.55E-04	14	118	"COL1A1,WISP1,IL6R,COL5A1,IGF1R,COL3A1,IGFBP3,OSMR,TGFB3,THBS1,RHBDF2,KDR,GHR,ITGAV"
GO: Molecular Function	identical protein binding	2.22E-06	6.55E-04	55	1109	"GJC3,CEBPB,GDF6,SNX33,FIGF,NR4A1,HMOX1,COL1A1,WAS,ALOX5AP,CLDN1,IRAK3,IL6R,S100A6,IGF1R,CORO1A,CCL4,FAS,TYROBP,PDE2A,MGST1,PLEK,ATF3,KCTD13,CLN6,TGFB2,TGFB3,THBS1,GHR,COL18A1,CLEC4M,ITGB3,DIAPH1,BMP4,BMP2,B4GALT1,DYNLT1,TEF,GBP1,CLDN15,ECE1,PTGS2,BHLHE40,C1QTNF3,CARS,TARBP2,ABCG1,FOXP1,LCP1,ENO3,LGALS1,CD4,LCN2,ZBTB16,CD74"
GO: Molecular Function	extracellular matrix structural constituent	6.14E-06	1.36E-03	11	80	"FBN2,COL1A1,COL14A1,COL12A1,COL5A1,COL3A1,FN1,PXDN,COL27A1,ELN,CD4"
GO: Molecular Function	extracellular matrix binding	1.69E-05	2.98E-03	8	45	"DCN,TGFBI,THBS1,GPR56,ITGA6,LGALS1,ELN,SPP1"
GO: Molecular Function	integrin binding	3.57E-05	5.27E-03	11	96	"COL5A1,COL3A1,ADAM22,ICAM1,TGFBI,THBS1,KDR,ITGB3,ITGA6,CD9,FBLN5"
GO: Molecular Function	carbohydrate binding	4.43E-05	5.40E-03	18	237	"SELL,SELE,CD302,MBL2,MAN2A1,FUCA1,GAL3ST3,CLEC10A,THBD,LGALS13,CLEC4M,PAM,H6PD,LOXL2,P4HA3,LGALS4,LGALS1,LGALS3"
GO: Molecular Function	peptide binding	4.88E-05	5.40E-03	17	217	"HLA-DQA1,HLA-B,TM2D1,ANG,IGF1R,MGST1,KDELR3,TGFB2,SLC7A5,GHR,CLEC4M,ITGAV,EDNRB,ECE1,LDLRAD3,GPX3,CD74"
GO: Molecular Function	amide binding	8.09E-05	7.95E-03	17	226	"HLA-DQA1,HLA-B,TM2D1,ANG,IGF1R,MGST1,KDELR3,TGFB2,SLC7A5,GHR,CLEC4M,ITGAV,EDNRB,ECE1,LDLRAD3,GPX3,CD74"
GO: Molecular Function	protein homodimerization activity	1.53E-04	1.23E-02	34	674	"GJC3,CEBPB,GDF6,FIGF,NR4A1,HMOX1,ALOX5AP,IRAK3,IL6R,S100A6,CORO1A,PDE2A,MGST1,PLEK,CLN6,TGFB2,GHR,CLEC4M,BMP4,BMP2,B4GALT1,TEF,ECE1,PTGS2,BHLHE40,CARS,TARBP2,ABCG1,FOXP1,ENO3,LGALS1,CD4,LCN2,ZBTB16"
GO: Molecular Function	MHC class II protein binding	1.63E-04	1.23E-02	3	5	"CD4,LAG3,CD74"
GO: Molecular Function	enzyme binding	1.67E-04	1.23E-02	56	1326	"ABCA1,PPARG,DOCK4,CDKN2C,NLRP1,TRPV4,HMOX1,SELL,SELE,PRKAR2B,PIK3IP1,CLU,NEK6,ALOX5AP,LDB2,GPIHBP1,MBL2,PPP1R15A,IL6R,FAS,FN1,PLEK,CRY2,KCTD13,INF2,TGIF1,TIMP1,GHR,TNFAIP3,JAK3,ITGAV,DIAPH1,SERPINE1,CCNYL1,PAM,PTGS2,CACNB3,ERRFI1,ADAMTS4,RAB3D,HCLS1,AKAP12,FZD5,EPAS1,IRS2,EPHA1,CD4,PDLIM5,LCN2,CDH5,EGR1,EHHADH,STAT3,PTPRR,CD74,ANKRD1"
GO: Molecular Function	RNA polymerase II transcription regulatory region sequence-specific DNA binding transcription factor activity involved in positive regulation of transcription	2.52E-04	1.70E-02	10	100	"PPARG,CEBPB,NR4A1,DBP,NR4A3,KLF15,BTG2,EPAS1,CREB3L1,EGR1"
GO: Molecular Function	RNA polymerase II core promoter proximal region sequence-specific DNA binding transcription factor activity involved in positive regulation of transcription	2.78E-04	1.70E-02	9	83	"CEBPB,NR4A1,DBP,NR4A3,KLF15,BTG2,EPAS1,CREB3L1,EGR1"
GO: Molecular Function	oxidoreductase activity	2.89E-04	1.70E-02	35	726	"CDO1,SOD3,HMOX1,PHYHD1,ALDH1A2,ALOX5AP,PGD,DEGS2,COX6B2,CP,STAB2,CYP39A1,CYP26B1,MGST1,RDH10,IFI30,SDR39U1,CYP4B1,CYP4V2,CYP1B1,CYBB,BCKDHA,BMP2,PAM,GSTO1,PTGS2,GFOD2,H6PD,PXDN,LOX,LOXL2,P4HA3,GPX3,CYGB,EHHADH"
GO: Molecular Function	cytokine receptor binding	4.63E-04	2.31E-02	16	238	"FIGF,IL6R,CCL17,CCL4,CCL2,CXCL9,ANGPT4,TGFB2,TGFB3,ITGB3,CXCL10,PXDN,TNFSF8,CXCL1,NGF,STAT3"
GO: Molecular Function	cholesterol transporter activity	4.71E-04	2.31E-02	4	15	"ABCA1,ABCG5,STARD5,ABCG1"
GO: Molecular Function	protein dimerization activity	4.81E-04	2.31E-02	47	1104	"GJC3,ELTD1,CEBPB,GDF6,FIGF,NR4A1,HMOX1,ABCG5,HLA-DQA1,HLA-B,ALOX5AP,BCL2L11,IRAK3,IL6R,S100A6,CORO1A,FZD2,PDE2A,MGST1,FOS,PLEK,CLN6,TGFB2,TGFB3,GHR,CYBB,CLEC4M,ITGAV,BMP4,BMP2,B4GALT1,TEF,MYC,ECE1,PTGS2,BHLHE40,CARS,TARBP2,EPAS1,ABCG1,FOXP1,ENO3,LGALS1,CD4,LCN2,ZBTB16,STAT3"
GO: Molecular Function	antioxidant activity	5.11E-04	2.31E-02	8	72	"SOD3,ALOX5AP,MGST1,GSTO1,PTGS2,PXDN,GPX3,CYGB"
GO: Molecular Function	oligosaccharide binding	5.48E-04	2.31E-02	3	7	"SELE,LOXL2,LGALS1"
GO: Molecular Function	insulin-like growth factor I binding	5.48E-04	2.31E-02	3	7	"IGF1R,IGFBP3,ITGAV"
GO: Molecular Function	sterol transporter activity	6.15E-04	2.47E-02	4	16	"ABCA1,ABCG5,STARD5,ABCG1"
GO: Molecular Function	cytokine binding	6.73E-04	2.59E-02	8	75	"AGER,IL6R,IFNGR1,TGFB3,THBS1,ITGAV,NBL1,CD74"
GO: Molecular Function	signaling receptor activity	7.14E-04	2.61E-02	54	1343	"FCER1G,ABCA1,PPARG,ELTD1,GPR116,CHRNB1,TRPV4,NR4A1,ADRA1D,SELE,AGER,TNFRSF19,F2RL1,F2R,HLA-DQA1,MTNR1B,TM2D1,GPR176,LY96,IL4R,IL6R,FRZB,IFNGR1,TLR7,IGF1R,PTPRU,FZD2,FAS,OSMR,CTSH,CRY2,ICAM1,THBD,KDR,GHR,GPR56,LRRC32,NR4A3,CLEC4M,IGSF6,RAMP2,FZD7,IL15RA,EDNRB,GPR126,FZD5,EPHA1,PTCH2,CD4,SPN,LPAR4,LAG3,PTPRR,CD74"
GO: Molecular Function	protease binding	7.36E-04	2.61E-02	8	76	"SELL,MBL2,FN1,TIMP1,TNFAIP3,SERPINE1,ADAMTS4,LCN2"
GO: Molecular Function	RNA polymerase II core promoter proximal region sequence-specific DNA binding transcription factor activity	8.26E-04	2.64E-02	10	116	"CEBPB,NR4A1,DBP,NR4A3,KLF15,BHLHE40,BTG2,EPAS1,CREB3L1,EGR1"
GO: Molecular Function	chemokine receptor binding	8.48E-04	2.64E-02	7	60	"CCL17,CCL4,CCL2,CXCL9,CXCL10,CXCL1,STAT3"
GO: Molecular Function	peroxidase activity	8.64E-04	2.64E-02	6	44	"ALOX5AP,MGST1,PTGS2,PXDN,GPX3,CYGB"
GO: Molecular Function	"oxidoreductase activity, acting on peroxide as acceptor"	8.64E-04	2.64E-02	6	44	"ALOX5AP,MGST1,PTGS2,PXDN,GPX3,CYGB"
GO: Molecular Function	protein complex binding	1.22E-03	3.60E-02	33	728	"FCER1G,FSCN1,FGF13,TRPV4,F2RL1,F2R,BCL2L11,COL5A1,IGF1R,COL3A1,CORO1A,CTSH,ADAM22,MMP3,ICAM1,TGFBI,THBS1,KDR,HMGN3,GNAL,BCKDHA,ITGB3,EPS8L1,UXT,ITGA6,FSTL3,MYC,HCLS1,IRS2,LCP1,CD9,LGALS3,FBLN5"
GO: Molecular Function	kinase binding	1.27E-03	3.62E-02	25	500	"CDKN2C,TRPV4,PRKAR2B,PIK3IP1,NEK6,PPP1R15A,FAS,PLEK,CRY2,TGIF1,GHR,TNFAIP3,ITGAV,CCNYL1,PAM,CACNB3,ERRFI1,HCLS1,FZD5,IRS2,EPHA1,CD4,PDLIM5,STAT3,PTPRR"
GO: Molecular Function	cytokine activity	1.34E-03	3.70E-02	14	214	"GDF6,CCL17,CCL4,CCL2,CXCL9,TGFB2,BMP4,BMP2,CXCL10,EDN1,TNFSF8,TSLP,SPP1,CXCL1"
GO: Molecular Function	chemokine activity	1.38E-03	3.70E-02	6	48	"CCL17,CCL4,CCL2,CXCL9,CXCL10,CXCL1"
GO: Molecular Function	CCR chemokine receptor binding	1.51E-03	3.93E-02	4	20	"CCL17,CCL4,CCL2,STAT3"
GO: Molecular Function	Wnt-activated receptor activity	1.83E-03	4.62E-02	4	21	"FRZB,FZD2,FZD7,FZD5"
GO: Molecular Function	transmembrane signaling receptor activity	2.00E-03	4.91E-02	49	1246	"FCER1G,ABCA1,PPARG,ELTD1,GPR116,CHRNB1,TRPV4,ADRA1D,SELE,AGER,TNFRSF19,F2RL1,F2R,HLA-DQA1,MTNR1B,TM2D1,GPR176,IL4R,IL6R,FRZB,IFNGR1,TLR7,IGF1R,PTPRU,FZD2,FAS,OSMR,CTSH,ICAM1,THBD,KDR,GHR,GPR56,LRRC32,CLEC4M,IGSF6,FZD7,IL15RA,EDNRB,GPR126,FZD5,EPHA1,PTCH2,CD4,SPN,LPAR4,LAG3,PTPRR,CD74"
GO: Molecular Function	heme binding	2.20E-03	5.26E-02	10	132	"HMOX1,CYP39A1,CYP26B1,CYP4B1,CYP4V2,CYP1B1,CYBB,PTGS2,PXDN,CYGB"
GO: Molecular Function	actin binding	2.51E-03	5.84E-02	20	386	"FSCN1,TRPV4,CNN1,SYNPO2,WAS,LIMCH1,ANG,CORO1A,PLEC,INF2,LMOD1,TNNT2,SSH3,EPS8L1,UXT,DIAPH1,CAPG,TAGLN,LCP1,PDLIM5"
GO: Molecular Function	platelet-derived growth factor binding	3.13E-03	6.92E-02	3	12	"COL1A1,COL5A1,COL3A1"
GO: Molecular Function	vascular endothelial growth factor receptor binding	3.13E-03	6.92E-02	3	12	"FIGF,ANGPT4,ITGB3"
GO: Molecular Function	protein kinase binding	3.36E-03	7.25E-02	22	452	"CDKN2C,TRPV4,PRKAR2B,NEK6,PPP1R15A,PLEK,CRY2,TGIF1,GHR,ITGAV,CCNYL1,PAM,CACNB3,ERRFI1,HCLS1,FZD5,IRS2,EPHA1,CD4,PDLIM5,STAT3,PTPRR"
GO: Molecular Function	tetrapyrrole binding	3.55E-03	7.33E-02	10	141	"HMOX1,CYP39A1,CYP26B1,CYP4B1,CYP4V2,CYP1B1,CYBB,PTGS2,PXDN,CYGB"
GO: Molecular Function	insulin-like growth factor binding	3.56E-03	7.33E-02	4	25	"WISP1,IGF1R,IGFBP3,ITGAV"
GO: Molecular Function	protein-lysine 6-oxidase activity	3.83E-03	7.45E-02	2	4	"LOX,LOXL2"
GO: Molecular Function	transforming growth factor beta binding	3.99E-03	7.45E-02	3	13	"TGFB3,THBS1,ITGAV"
GO: Molecular Function	lyase activity	4.03E-03	7.45E-02	11	167	"SGPL1,ALOX5AP,UMPS,PTPLA,CRY2,DDT,GNAL,BCKDHA,PAM,ENO3,EHHADH"
GO: Molecular Function	glutathione transferase activity	4.12E-03	7.45E-02	4	26	"ALOX5AP,MGST1,GSTO1,GSTA3"
GO: Molecular Function	phosphatidylinositol 3-kinase binding	4.12E-03	7.45E-02	4	26	"PIK3IP1,IGF1R,CORO1A,IRS2"
GO: Molecular Function	"oxidoreductase activity, acting on single donors with incorporation of molecular oxygen, incorporation of two atoms of oxygen"	4.12E-03	7.45E-02	4	26	"CDO1,ALOX5AP,PTGS2,P4HA3"
GO: Molecular Function	"oxidoreductase activity, acting on single donors with incorporation of molecular oxygen"	4.74E-03	8.39E-02	4	27	"CDO1,ALOX5AP,PTGS2,P4HA3"
GO: Molecular Function	copper ion binding	5.11E-03	8.80E-02	6	62	"SOD3,ANG,CP,PAM,LOX,LOXL2"
GO: Molecular Function	protein heterodimerization activity	5.17E-03	8.80E-02	22	469	"CEBPB,NR4A1,ABCG5,HLA-DQA1,HLA-B,ALOX5AP,BCL2L11,IRAK3,FZD2,FOS,TGFB2,TGFB3,CYBB,ITGAV,BMP2,TEF,MYC,BHLHE40,EPAS1,ABCG1,FOXP1,ENO3"
GO: Molecular Function	sulfur compound binding	5.52E-03	9.23E-02	12	199	"SOD3,SELL,ANG,COL5A1,CCL2,GAL3ST3,MGST1,FN1,RPL29,THBS1,BMP4,GPX3"
GO: Molecular Function	cytokine receptor activity	5.88E-03	9.61E-02	7	84	"IL4R,IL6R,IFNGR1,OSMR,GHR,IL15RA,CD74"
GO: Molecular Function	tropomyosin binding	6.11E-03	9.61E-02	3	15	"S100A6,LMOD1,TNNT2"
GO: Molecular Function	IgE binding	6.27E-03	9.61E-02	2	5	"FCER1G,LGALS3"
GO: Molecular Function	thrombin receptor activity	6.27E-03	9.61E-02	2	5	"F2RL1,F2R"
GO: Molecular Function	G-protein coupled receptor binding	6.30E-03	9.61E-02	13	228	"ADM,UCHL1,CCL17,CCL4,CCL2,CXCL9,GNAL,CXCL10,EDN1,EDNRB,ARRDC3,CXCL1,STAT3"
GO: Molecular Function	Wnt-protein binding	6.97E-03	1.03E-01	4	30	"FRZB,FZD2,FZD7,FZD5"
GO: Biological Process	response to wounding	3.61E-17	9.10E-14	85	1202	"FCER1G,PPARG,CDO1,CEBPB,NLRP1,ENPP4,FIGF,HMOX1,ADM,SELL,SELE,AGER,COL1A1,PRKAR2B,IER3,PRCP,FABP4,CLU,F2RL1,F2R,WAS,ALOX5AP,NFKBIZ,MBL2,CFP,LY96,IL4R,IL6R,TLR7,COL5A1,COL3A1,PECAM1,CCL17,CCL4,CCL2,PDE2A,CXCL9,FN1,OSMR,ANGPT4,CTSS,MAFF,PLAT,FOS,PLAU,PLEK,ATP1B1,TGM2,DCN,TGFB2,TGFB3,SLC7A5,THBS1,THBD,TIMP1,RTN4RL2,TNFAIP3,CYBB,BCL6,LRRC32,ITGB3,ITGAV,SERPINE1,BMP2,ITGA6,B4GALT1,FZD7,CXCL10,MYC,EDN1,EDNRB,PTGS2,C1QTNF3,LOX,LCP1,KANK1,ENO3,CD9,LGALS1,SPN,RAC2,SPP1,CXCL1,NGF,STAT3"
GO: Biological Process	vasculature development	4.78E-17	9.10E-14	56	585	"ACTA2,FIGF,NR4A1,HMOX1,ADM,COL1A1,SGPL1,ZC3H12A,ALDH1A2,ANG,ANXA3,SAT1,STAB2,FRZB,SOCS3,COL5A1,COL8A1,COL3A1,PECAM1,FZD2,CCL2,TNFRSF12A,FN1,ANGPT4,PLAU,CTSH,HSPG2,TGFBI,TGFB2,THBS1,KDR,GPR56,COL18A1,TNFAIP3,CYP1B1,JUNB,ITGB3,ITGAV,BMP4,SERPINE1,B4GALT1,RAMP2,FZD7,CXCL10,EDN1,APOLD1,PTGS2,ERRFI1,LOX,LOXL2,FZD5,EPAS1,EPHA1,SULF1,CDH5,EGR1"
GO: Biological Process	regulation of cellular component movement	6.02E-17	9.10E-14	56	588	"ADARB1,FIGF,HMOX1,SELL,SELE,SEMA3F,AGER,COL1A1,F2RL1,F2R,ANXA3,IL6R,IGF1R,COL3A1,IGFBP3,PECAM1,CORO1A,PTPRU,CCL4,CCL2,PDE4B,FN1,ANGPT4,PLAU,CTSH,MMP3,ICAM1,TGFB2,THBS1,TIMP1,KDR,GPR56,COL18A1,TNNT2,BCL6,ELP6,ITGB3,ITGAV,DIAPH1,BMP4,SERPINE1,BMP2,SSX2IP,B4GALT1,CXCL10,EDN1,PTGS2,NBL1,DPEP1,IRS2,EPHA1,KANK1,LAMA2,SULF1,STAT3,CD74"
GO: Biological Process	cell migration	7.35E-17	9.10E-14	75	987	"FCER1G,DOCK4,HOXB9,FSCN1,FGF13,ADARB1,FIGF,NR4A1,HMOX1,SELL,SELE,SEMA3F,AGER,COL1A1,SGPL1,F2RL1,F2R,ANG,ANXA3,IL6R,COL5A1,IGF1R,COL3A1,IGFBP3,PECAM1,CORO1A,PTPRU,CCL4,CCL2,PDE4B,TNFRSF12A,FN1,ANGPT4,PLAT,PLAU,CTSH,KCTD13,MMP3,ATP1B1,ICAM1,TGFB2,SLC7A5,THBS1,THBD,TIMP1,KDR,GPR56,COL18A1,CYP1B1,ELP6,ITGB3,ITGAV,DIAPH1,BMP4,SERPINE1,BMP2,ITGA6,B4GALT1,CXCL10,EDN1,EDNRB,PTGS2,NBL1,LOXL2,DPEP1,IRS2,EPHA1,KANK1,LAMA2,SPN,SULF1,SPP1,CXCL1,STAT3,CD74"
GO: Biological Process	regulation of cell migration	2.51E-16	2.49E-13	50	493	"ADARB1,FIGF,HMOX1,SELL,SELE,AGER,COL1A1,F2RL1,F2R,ANXA3,IL6R,IGF1R,COL3A1,IGFBP3,PECAM1,CORO1A,PTPRU,CCL4,CCL2,FN1,ANGPT4,PLAU,CTSH,MMP3,ICAM1,TGFB2,THBS1,TIMP1,KDR,GPR56,COL18A1,ELP6,ITGB3,ITGAV,DIAPH1,BMP4,SERPINE1,BMP2,CXCL10,EDN1,PTGS2,NBL1,DPEP1,IRS2,EPHA1,KANK1,LAMA2,SULF1,STAT3,CD74"
GO: Biological Process	cell adhesion	5.17E-16	3.55E-13	75	1023	"PERP,CTNNAL1,SELL,SELE,AGER,COL1A1,WISP1,CLDN1,BCL2L11,FBLIM1,STAB2,COL14A1,COL12A1,COL5A1,COL8A1,COL3A1,PECAM1,CORO1A,PTPRU,CCL4,CCL2,TNFRSF12A,FN1,PLAU,PLEK,RPL29,ADAM22,ATP1B1,ICAM1,TGM2,TGFBI,TGFB2,FAT4,THBS1,CYTH1,KDR,GPR56,COL18A1,TNFAIP3,CYP1B1,SPON2,SPON1,BCL6,CLEC4M,ITGB3,ITGAV,SERPINE1,BMP2,SSX2IP,BMX,ITGA6,B4GALT1,FZD7,CADM4,FSTL3,PCDH7,CLDN15,ACER2,PCDHB15,LOXL2,PPFIBP1,EPHA1,KANK1,CD33,LGALS4,CD9,LGALS1,CD4,LAMA2,SPN,ZYX,SPP1,CDH11,CDH5,FBLN5"
GO: Biological Process	regulation of cell motility	5.36E-16	3.55E-13	51	521	"ADARB1,FIGF,HMOX1,SELL,SELE,AGER,COL1A1,F2RL1,F2R,ANXA3,IL6R,IGF1R,COL3A1,IGFBP3,PECAM1,CORO1A,PTPRU,CCL4,CCL2,FN1,ANGPT4,PLAU,CTSH,MMP3,ICAM1,TGFB2,THBS1,TIMP1,KDR,GPR56,COL18A1,ELP6,ITGB3,ITGAV,DIAPH1,BMP4,SERPINE1,BMP2,SSX2IP,CXCL10,EDN1,PTGS2,NBL1,DPEP1,IRS2,EPHA1,KANK1,LAMA2,SULF1,STAT3,CD74"
GO: Biological Process	regulation of locomotion	5.74E-16	3.55E-13	53	560	"ADARB1,FIGF,HMOX1,SELL,SELE,SEMA3F,AGER,COL1A1,F2RL1,F2R,ANXA3,IL6R,IGF1R,COL3A1,IGFBP3,PECAM1,CORO1A,PTPRU,CCL4,CCL2,FN1,ANGPT4,PLAU,CTSH,MMP3,ICAM1,TGFB2,THBS1,TIMP1,KDR,GPR56,COL18A1,ELP6,ITGB3,ITGAV,DIAPH1,BMP4,SERPINE1,BMP2,SSX2IP,CXCL10,EDN1,ARRDC3,PTGS2,NBL1,DPEP1,IRS2,EPHA1,KANK1,LAMA2,SULF1,STAT3,CD74"
GO: Biological Process	biological adhesion	6.72E-16	3.70E-13	75	1028	"PERP,CTNNAL1,SELL,SELE,AGER,COL1A1,WISP1,CLDN1,BCL2L11,FBLIM1,STAB2,COL14A1,COL12A1,COL5A1,COL8A1,COL3A1,PECAM1,CORO1A,PTPRU,CCL4,CCL2,TNFRSF12A,FN1,PLAU,PLEK,RPL29,ADAM22,ATP1B1,ICAM1,TGM2,TGFBI,TGFB2,FAT4,THBS1,CYTH1,KDR,GPR56,COL18A1,TNFAIP3,CYP1B1,SPON2,SPON1,BCL6,CLEC4M,ITGB3,ITGAV,SERPINE1,BMP2,SSX2IP,BMX,ITGA6,B4GALT1,FZD7,CADM4,FSTL3,PCDH7,CLDN15,ACER2,PCDHB15,LOXL2,PPFIBP1,EPHA1,KANK1,CD33,LGALS4,CD9,LGALS1,CD4,LAMA2,SPN,ZYX,SPP1,CDH11,CDH5,FBLN5"
GO: Biological Process	cell motility	2.18E-15	9.31E-13	76	1074	"FCER1G,DOCK4,HOXB9,FSCN1,FGF13,ADARB1,FIGF,NR4A1,HMOX1,SELL,SELE,SEMA3F,AGER,COL1A1,SGPL1,F2RL1,F2R,ANG,ANXA3,IL6R,COL5A1,IGF1R,COL3A1,IGFBP3,PECAM1,CORO1A,PTPRU,CCL4,CCL2,PDE4B,TNFRSF12A,FN1,ANGPT4,PLAT,PLAU,CTSH,KCTD13,MMP3,ATP1B1,ICAM1,TGFB2,SLC7A5,THBS1,THBD,TIMP1,KDR,GPR56,COL18A1,CYP1B1,ELP6,ITGB3,ITGAV,DIAPH1,BMP4,SERPINE1,BMP2,SSX2IP,ITGA6,B4GALT1,CXCL10,EDN1,EDNRB,PTGS2,NBL1,LOXL2,DPEP1,IRS2,EPHA1,KANK1,LAMA2,SPN,SULF1,SPP1,CXCL1,STAT3,CD74"
GO: Biological Process	localization of cell	2.18E-15	9.31E-13	76	1074	"FCER1G,DOCK4,HOXB9,FSCN1,FGF13,ADARB1,FIGF,NR4A1,HMOX1,SELL,SELE,SEMA3F,AGER,COL1A1,SGPL1,F2RL1,F2R,ANG,ANXA3,IL6R,COL5A1,IGF1R,COL3A1,IGFBP3,PECAM1,CORO1A,PTPRU,CCL4,CCL2,PDE4B,TNFRSF12A,FN1,ANGPT4,PLAT,PLAU,CTSH,KCTD13,MMP3,ATP1B1,ICAM1,TGFB2,SLC7A5,THBS1,THBD,TIMP1,KDR,GPR56,COL18A1,CYP1B1,ELP6,ITGB3,ITGAV,DIAPH1,BMP4,SERPINE1,BMP2,SSX2IP,ITGA6,B4GALT1,CXCL10,EDN1,EDNRB,PTGS2,NBL1,LOXL2,DPEP1,IRS2,EPHA1,KANK1,LAMA2,SPN,SULF1,SPP1,CXCL1,STAT3,CD74"
GO: Biological Process	blood vessel development	2.25E-15	9.31E-13	52	559	"ACTA2,FIGF,NR4A1,HMOX1,ADM,COL1A1,SGPL1,ZC3H12A,ALDH1A2,ANG,ANXA3,SAT1,STAB2,SOCS3,COL5A1,COL8A1,COL3A1,PECAM1,CCL2,TNFRSF12A,FN1,ANGPT4,PLAU,CTSH,HSPG2,TGFBI,TGFB2,THBS1,KDR,GPR56,COL18A1,TNFAIP3,CYP1B1,JUNB,ITGB3,ITGAV,BMP4,SERPINE1,B4GALT1,RAMP2,CXCL10,EDN1,APOLD1,PTGS2,LOX,LOXL2,FZD5,EPAS1,EPHA1,SULF1,CDH5,EGR1"
GO: Biological Process	positive regulation of cellular component movement	5.25E-15	2.00E-12	37	300	"FIGF,SELL,SELE,AGER,COL1A1,F2RL1,F2R,ANXA3,IL6R,IGF1R,PECAM1,CORO1A,CCL4,CCL2,FN1,ANGPT4,PLAU,CTSH,ICAM1,TGFB2,THBS1,KDR,COL18A1,BCL6,ELP6,ITGB3,ITGAV,DIAPH1,BMP4,SERPINE1,BMP2,CXCL10,EDN1,PTGS2,IRS2,EPHA1,CD74"
GO: Biological Process	locomotion	6.25E-15	2.21E-12	89	1411	"FCER1G,DOCK4,HOXB9,FSCN1,FGF13,ADARB1,FIGF,NR4A1,HMOX1,SELL,SELE,SEMA3F,AGER,COL1A1,SGPL1,F2RL1,F2R,ANG,ANXA3,IL6R,COL5A1,IGF1R,COL3A1,IGFBP3,PECAM1,CORO1A,CCL17,PTPRU,CCL4,CCL2,TYROBP,PDE4B,CXCL9,TNFRSF12A,FN1,ANGPT4,PLAT,PLAU,CTSH,WWP1,KCTD13,MMP3,ATP1B1,ICAM1,CLN6,TGFB2,SLC7A5,THBS1,THBD,TIMP1,KDR,GPR56,COL18A1,CYP1B1,SPON2,NR4A3,ELP6,ITGB3,ITGAV,DIAPH1,BMP4,SERPINE1,BMP2,SSX2IP,ITGA6,B4GALT1,DYNLT1,CXCL10,EDN1,EDNRB,ARRDC3,PTGS2,CACNB3,NBL1,LOXL2,DPEP1,FOXP1,IRS2,EPHA1,KANK1,CD4,LAMA2,SPN,SULF1,RAC2,SPP1,CXCL1,STAT3,CD74"
GO: Biological Process	positive regulation of cell migration	7.31E-15	2.26E-12	36	287	"FIGF,SELL,SELE,AGER,COL1A1,F2RL1,F2R,ANXA3,IL6R,IGF1R,PECAM1,CORO1A,CCL4,CCL2,FN1,ANGPT4,PLAU,CTSH,ICAM1,TGFB2,THBS1,KDR,COL18A1,ELP6,ITGB3,ITGAV,DIAPH1,BMP4,SERPINE1,BMP2,CXCL10,EDN1,PTGS2,IRS2,EPHA1,CD74"
GO: Biological Process	circulatory system development	7.77E-15	2.26E-12	66	871	"PPARG,ACTA2,FIGF,NR4A1,HMOX1,ADM,COL1A1,SGPL1,ZC3H12A,ALDH1A2,ANG,ANXA3,SAT1,STAB2,COL14A1,FRZB,SOCS3,COL5A1,COL8A1,COL3A1,PECAM1,FZD2,CCL2,TNFRSF12A,FN1,ANGPT4,PLAU,CTSH,HSPG2,TGFBI,TGFB2,FAT4,THBS1,KDR,GPR56,COL18A1,TNFAIP3,CYP1B1,TNNT2,JUNB,ITGB3,ITGAV,BMP4,SERPINE1,BMP2,B4GALT1,RAMP2,FZD7,PAM,CXCL10,EDN1,ECE1,APOLD1,PTGS2,ERRFI1,LY6E,LOX,LOXL2,FZD5,EPAS1,FOXP1,EPHA1,SULF1,CDH5,EGR1,ANKRD1"
GO: Biological Process	cardiovascular system development	7.77E-15	2.26E-12	66	871	"PPARG,ACTA2,FIGF,NR4A1,HMOX1,ADM,COL1A1,SGPL1,ZC3H12A,ALDH1A2,ANG,ANXA3,SAT1,STAB2,COL14A1,FRZB,SOCS3,COL5A1,COL8A1,COL3A1,PECAM1,FZD2,CCL2,TNFRSF12A,FN1,ANGPT4,PLAU,CTSH,HSPG2,TGFBI,TGFB2,FAT4,THBS1,KDR,GPR56,COL18A1,TNFAIP3,CYP1B1,TNNT2,JUNB,ITGB3,ITGAV,BMP4,SERPINE1,BMP2,B4GALT1,RAMP2,FZD7,PAM,CXCL10,EDN1,ECE1,APOLD1,PTGS2,ERRFI1,LY6E,LOX,LOXL2,FZD5,EPAS1,FOXP1,EPHA1,SULF1,CDH5,EGR1,ANKRD1"
GO: Biological Process	positive regulation of cell motility	1.26E-14	3.46E-12	36	292	"FIGF,SELL,SELE,AGER,COL1A1,F2RL1,F2R,ANXA3,IL6R,IGF1R,PECAM1,CORO1A,CCL4,CCL2,FN1,ANGPT4,PLAU,CTSH,ICAM1,TGFB2,THBS1,KDR,COL18A1,ELP6,ITGB3,ITGAV,DIAPH1,BMP4,SERPINE1,BMP2,CXCL10,EDN1,PTGS2,IRS2,EPHA1,CD74"
GO: Biological Process	response to external stimulus	1.52E-14	3.96E-12	91	1483	"FCER1G,PPARG,DOCK4,HOXB9,NLRP1,TRPV4,FKBP1B,FIGF,NR4A1,HMOX1,ADM,SELL,SELE,ABCG5,SEMA3F,AGER,COL1A1,IER3,FABP4,F2RL1,F2R,HLA-B,ALDH1A2,ALOX5AP,MBL2,CFP,PER1,IL6R,TLR7,COL5A1,IGF1R,COL3A1,CORO1A,CCL17,CCL4,FAS,CCL2,TYROBP,PDE2A,PDE4B,CXCL9,FN1,OSMR,CTSS,PLAT,FOS,PLAU,PLEK,PLEC,HSPG2,RDH10,ICAM1,TGM2,DCN,TGFB2,THBS1,THBD,KDR,GHR,TNFAIP3,SPON2,JUNB,BCL6,LRRC32,NR4A3,ITGB3,ITGAV,BMP4,SERPINE1,ITGA6,CXCL10,MYC,EDN1,EDNRB,PTGS2,CACNB3,BHLHE40,C1QTNF3,NBL1,BTG2,FOXP1,LAMA2,SPN,LCN2,RAC2,SPP1,CXCL1,NGF,EGR1,CD74,ANKRD1"
GO: Biological Process	extracellular matrix organization	2.09E-14	5.17E-12	38	330	"FBN2,COL1A1,COL14A1,COL12A1,COL5A1,COL8A1,COL3A1,FN1,CTSK,PLEC,HSPG2,MMP3,DCN,TGFBI,TGFB2,TGFB3,THBS1,TIMP1,COL18A1,ITGB3,ITGAV,BMP4,SERPINE1,BMP2,ITGA6,B4GALT1,RAMP2,GFOD2,PXDN,LOX,LOXL2,COL27A1,LGALS3,ELN,LAMA2,SULF1,SPP1,FBLN5"
GO: Biological Process	extracellular structure organization	2.30E-14	5.43E-12	38	331	"FBN2,COL1A1,COL14A1,COL12A1,COL5A1,COL8A1,COL3A1,FN1,CTSK,PLEC,HSPG2,MMP3,DCN,TGFBI,TGFB2,TGFB3,THBS1,TIMP1,COL18A1,ITGB3,ITGAV,BMP4,SERPINE1,BMP2,ITGA6,B4GALT1,RAMP2,GFOD2,PXDN,LOX,LOXL2,COL27A1,LGALS3,ELN,LAMA2,SULF1,SPP1,FBLN5"
GO: Biological Process	positive regulation of locomotion	3.58E-14	8.07E-12	36	302	"FIGF,SELL,SELE,AGER,COL1A1,F2RL1,F2R,ANXA3,IL6R,IGF1R,PECAM1,CORO1A,CCL4,CCL2,FN1,ANGPT4,PLAU,CTSH,ICAM1,TGFB2,THBS1,KDR,COL18A1,ELP6,ITGB3,ITGAV,DIAPH1,BMP4,SERPINE1,BMP2,CXCL10,EDN1,PTGS2,IRS2,EPHA1,CD74"
GO: Biological Process	response to other organism	4.58E-14	9.86E-12	55	664	"FCER1G,ABCA1,ACTA2,CEBPB,NLRP1,ADARB1,ADM,SELE,IER3,CLU,ZC3H12A,F2RL1,F2R,HLA-B,MBL2,BCL2L11,CFP,LY96,ANXA3,IRAK3,IL4R,STAB2,IL6R,IFNGR1,TLR7,CCL4,CCL2,PDE4B,MGST1,IRF8,CXCL9,FOS,ICAM1,DCN,TNFAIP3,LRRC32,CLEC4M,ITGAV,SERPINE1,POLR3D,NLRC5,CXCL10,GBP1,EDN1,EDNRB,PTGS2,LITAF,TARBP2,FZD5,TNFSF8,CD4,SPN,LCN2,NGF,ANKRD1"
GO: Biological Process	regulation of multicellular organismal development	6.21E-14	1.28E-11	84	1341	"FBN2,PPARG,FGF13,GDF6,TRPV4,PMP22,HMOX1,ADM,SEMA3F,AGER,COL1A1,HLA-DQA1,HLA-B,HLA-DMA,ANXA3,IRAK3,IL4R,COL14A1,MAN2A1,FRZB,COL3A1,IGFBP3,FZD2,FAS,CCL2,TYROBP,CYP26B1,TNFRSF12A,ANGPT4,MAFF,FOS,PLAU,CTSH,MBNL3,TGIF1,TGFB2,TGFB3,KLF10,THBS1,TIMP1,KDR,GPR56,TNFAIP3,JAK3,SSH3,BCL6,ITGB3,BMP4,SERPINE1,BMP2,B4GALT1,RAMP2,FZD7,DYNLT1,CXCL10,IL15RA,FSTL3,MYC,EDN1,EDNRB,APOLD1,PTGS2,ERRFI1,NBL1,LOXL2,HCLS1,RUNX2,FOXP1,EPHA1,KANK1,CREB3L1,LFNG,LGALS1,LAMA2,IFITM5,PDLIM5,SULF1,SPP1,ZBTB16,NGF,EGR1,STAT3,CD74,ANKRD1"
GO: Biological Process	response to biotic stimulus	9.47E-14	1.88E-11	56	697	"FCER1G,ABCA1,ACTA2,CEBPB,NLRP1,ADARB1,ADM,SELE,IER3,CLU,ZC3H12A,F2RL1,F2R,HLA-B,MBL2,BCL2L11,CFP,LY96,ANXA3,IRAK3,IL4R,STAB2,IL6R,IFNGR1,TLR7,CCL4,CCL2,PDE4B,MGST1,IRF8,CXCL9,FOS,ICAM1,DCN,TNFAIP3,LRRC32,CLEC4M,ITGAV,SERPINE1,POLR3D,NLRC5,CXCL10,GBP1,EDN1,EDNRB,PTGS2,LITAF,TARBP2,FZD5,TNFSF8,CD4,IFITM5,SPN,LCN2,NGF,ANKRD1"
GO: Biological Process	response to bacterium	1.40E-13	2.66E-11	41	404	"FCER1G,ABCA1,CEBPB,NLRP1,ADM,SELE,ZC3H12A,F2RL1,F2R,HLA-B,MBL2,CFP,LY96,ANXA3,IRAK3,STAB2,IL6R,CCL2,PDE4B,MGST1,IRF8,FOS,ICAM1,DCN,TNFAIP3,LRRC32,CLEC4M,ITGAV,SERPINE1,CXCL10,EDN1,EDNRB,PTGS2,LITAF,FZD5,TNFSF8,CD4,SPN,LCN2,NGF,ANKRD1"
GO: Biological Process	regulation of cell proliferation	1.47E-13	2.69E-11	84	1362	"PPARG,CDKN2C,ADARB1,FIGF,PMP22,NR4A1,HMOX1,ADM,ADRA1D,AGER,PTBP2,FABP4,F2R,HLA-DQA1,ALDH1A2,ANG,SAT1,IL4R,IL6R,S100A6,FRZB,IGF1R,IGFBP3,CORO1A,PTPRU,FAS,CCL2,OSMR,FOSL2,PLAU,CTSH,MNDA,ATF3,TGM2,TGIF1,TGFB2,TGFB3,KLF10,IFI30,THBS1,TIMP1,KDR,RERG,GPR56,COL18A1,TNFAIP3,JAK3,OGN,BCL6,LRRC32,ITGB3,ITGAV,BMP4,SERPINE1,BMP2,B4GALT1,FZD7,CXCL10,MYC,EDN1,EDNRB,SLC25A27,ACER2,PTGS2,HILPDA,BTG2,HCLS1,RUNX2,FZD5,FOXP1,IRS2,EPHA1,CD33,CD9,SPN,SULF1,RAC2,ZBTB16,CXCL1,NGF,CDH5,EGR1,STAT3,CD74"
GO: Biological Process	cell activation	1.67E-13	2.96E-11	63	861	"FCER1G,FKBP1B,FIGF,HMOX1,COL1A1,CPLX2,CLU,ZC3H12A,F2RL1,F2R,WAS,HLA-DQA1,HLA-DMA,ANXA3,IL4R,TLR7,COL3A1,PECAM1,CORO1A,MAP3K8,FAS,CCL2,TYROBP,FN1,PLEK,MNDA,WWP1,ICAM1,RELB,TGFB2,TGFB3,THBS1,THBD,TIMP1,TNFAIP3,JAK3,BCL6,LRRC32,PRAM1,ITGB3,ITGAV,BMP4,SERPINE1,FZD7,IL15RA,EDN1,APOLD1,SWAP70,RUNX2,FZD5,FOXP1,IRS2,LCP1,TNFSF8,CD9,LGALS1,ELF4,CD4,SPN,RAC2,LAG3,EGR1,CD74"
GO: Biological Process	defense response	1.91E-13	3.26E-11	87	1445	"FCER1G,PPARG,CDO1,CEBPB,NLRP1,ADARB1,NR4A1,HMOX1,SELE,AGER,PRKAR2B,IER3,FABP4,CLU,F2RL1,F2R,WAS,HLA-DQA1,HLA-B,ALOX5AP,NFKBIZ,MBL2,CFP,LY96,ANXA3,IRAK3,IL4R,STAB2,IL6R,IFNGR1,SOCS3,TLR7,CORO1A,CCL17,CCL4,CCL2,TYROBP,PDE2A,IRF8,CXCL9,FN1,OSMR,CTSS,FOS,CTSK,MNDA,ICAM1,CLEC10A,TGM2,IFI30,THBS1,MLF2,TNFAIP3,SPON2,CYBB,JAK3,BCL6,LRRC32,CLEC4M,ITGAV,SERPINE1,BMP2,POLR3D,B4GALT1,NLRC5,CXCL10,C1R,GBP1,EDNRB,PTGS2,C1QTNF3,TARBP2,IRS2,TNFSF8,RFTN1,LGALS3,CD4,DTX4,SPN,LCN2,SPP1,CXCL1,NGF,LAG3,EGR1,STAT3,CD74"
GO: Biological Process	response to lipid	2.74E-13	4.53E-11	53	651	"ABCA1,PPARG,CDO1,CEBPB,NR4A1,HMOX1,ADM,SELE,COL1A1,ZC3H12A,F2R,ALDH1A2,LY96,IRAK3,IL4R,FAS,CCL2,CYP26B1,PDE4B,MGST1,IRF8,MEST,PLAT,FOS,CTSH,ICAM1,DCN,TGFB2,TGFB3,THBS1,GHR,TNFAIP3,JUNB,NR4A3,BMP4,SERPINE1,RAMP2,FZD7,PAM,CXCL10,EDN1,EDNRB,ACER2,PTGS2,LITAF,LOX,ABCG1,LCN2,SPP1,NGF,EGR1,STAT3,ANKRD1"
GO: Biological Process	leukocyte migration	5.02E-13	8.02E-11	34	295	"FCER1G,FIGF,HMOX1,SELL,SELE,COL1A1,F2RL1,IL6R,PECAM1,CORO1A,CCL4,CCL2,PDE4B,FN1,ANGPT4,ATP1B1,ICAM1,TGFB2,SLC7A5,THBS1,THBD,ITGB3,ITGAV,SERPINE1,ITGA6,B4GALT1,CXCL10,EDN1,EDNRB,NBL1,SPN,SPP1,CXCL1,CD74"
GO: Biological Process	angiogenesis	6.26E-13	9.69E-11	40	404	"FIGF,NR4A1,HMOX1,ADM,ZC3H12A,ANG,ANXA3,SAT1,STAB2,COL8A1,CCL2,TNFRSF12A,FN1,ANGPT4,PLAU,CTSH,HSPG2,TGFBI,TGFB2,THBS1,KDR,GPR56,COL18A1,TNFAIP3,CYP1B1,ITGB3,ITGAV,BMP4,SERPINE1,B4GALT1,RAMP2,CXCL10,EDN1,APOLD1,PTGS2,LOXL2,FZD5,EPAS1,EPHA1,SULF1"
GO: Biological Process	positive regulation of response to stimulus	7.49E-13	1.12E-10	86	1455	"FCER1G,PLEKHF1,GDF6,FIGF,HMOX1,SELL,AGER,COL1A1,FABP4,TNFRSF19,CLU,NEK6,F2RL1,F2R,WAS,HLA-DQA1,HLA-B,HLA-DMA,ALOX5AP,MBL2,BCL2L11,CFP,LY96,IRAK3,IL6R,TLR7,IGF1R,COL3A1,IGFBP3,PECAM1,CCL4,FAS,CCL2,PDE2A,PDE4B,TNFRSF12A,FN1,OSMR,CTSS,FOS,CTSK,CTSH,MNDA,TGM2,TGFB2,TGFB3,THBS1,KDR,GHR,GPR56,TNFAIP3,JAK3,LRRC32,ITGB3,ITGAV,BMP4,SERPINE1,BMP2,POLR3D,NLRC5,FZD7,CXCL10,C1R,MYC,EDN1,ECE1,ARRDC3,PTGS2,CACNB3,LITAF,C1QTNF3,HCLS1,AKAP12,FZD5,KANK1,RFTN1,LFNG,LGALS1,CD4,SULF1,ZNF385A,NGF,LAG3,STAT3,CD74,ANKRD1"
GO: Biological Process	inflammatory response	9.08E-13	1.32E-10	48	566	"FCER1G,PPARG,CDO1,CEBPB,NLRP1,HMOX1,SELE,AGER,IER3,FABP4,F2RL1,F2R,ALOX5AP,NFKBIZ,MBL2,CFP,LY96,IL4R,IL6R,TLR7,CCL17,CCL4,CCL2,PDE2A,CXCL9,FN1,OSMR,CTSS,FOS,TGM2,THBS1,TNFAIP3,CYBB,BCL6,LRRC32,ITGAV,SERPINE1,BMP2,B4GALT1,CXCL10,EDNRB,PTGS2,C1QTNF3,SPN,SPP1,CXCL1,NGF,STAT3"
GO: Biological Process	immune response	2.06E-12	2.92E-10	81	1353	"FCER1G,PPARG,CEBPB,NLRP1,ADARB1,NR4A1,HMOX1,SELL,AGER,PRKAR2B,CPLX2,CLU,F2RL1,WAS,HLA-DQA1,HLA-B,HLA-DMA,MBL2,CFP,LY96,ANXA3,IRAK3,IL4R,IL6R,IFNGR1,SOCS3,TLR7,IGF1R,COL3A1,CORO1A,CCL17,CCL4,FAS,CCL2,TYROBP,PDE4B,IRF8,CXCL9,CTSS,FOS,CTSK,CTSH,MNDA,ICAM1,CLEC10A,RELB,TGFB2,TGFB3,IFI30,THBS1,TNFAIP3,SPON2,CYBB,JAK3,BCL6,LRRC32,PRAM1,CLEC4M,POLR3D,IGSF6,NLRC5,CXCL10,C1R,GBP1,CACNB3,SWAP70,PXDN,IRS2,LCP1,TNFSF8,RFTN1,LGALS1,LGALS3,CD4,DTX4,SPN,LCN2,CXCL1,LAG3,EGR1,CD74"
GO: Biological Process	response to oxygen-containing compound	3.59E-12	4.94E-10	74	1190	"ABCA1,PPARG,CDO1,CEBPB,SOD3,NLRP1,FKBP1B,HMOX1,ADM,SELL,SELE,COL1A1,PRKAR2B,ZC3H12A,F2R,ALDH1A2,GPIHBP1,LY96,IRAK3,SOCS3,IGF1R,COL3A1,CCL2,PDE2A,CYP26B1,PDE4B,MGST1,IRF8,MEST,PLAT,FOS,CTSH,MMP3,ICAM1,DCN,TGFB2,TGFB3,THBS1,TIMP1,GHR,TNFAIP3,HMGN3,JAK3,JUNB,NR4A3,ITGAV,BMP4,SERPINE1,RAMP2,FZD7,PAM,CXCL10,EDN1,EDNRB,ACER2,PTGS2,LITAF,H6PD,PXDN,BTG2,DPEP1,IRS2,KANK1,GPX3,CD9,LGALS1,LCN2,SPP1,NGF,NNAT,EGR1,FBLN5,STAT3,ANKRD1"
GO: Biological Process	regulation of response to external stimulus	5.58E-12	7.48E-10	43	492	"FCER1G,PPARG,NLRP1,FIGF,SELL,SELE,SEMA3F,AGER,IER3,FABP4,F2RL1,F2R,ALOX5AP,MBL2,CFP,IL6R,TLR7,CCL4,CCL2,PDE2A,FN1,OSMR,CTSS,PLAT,PLAU,PLEK,TGM2,THBS1,THBD,KDR,TNFAIP3,BCL6,LRRC32,SERPINE1,CXCL10,EDN1,EDNRB,PTGS2,C1QTNF3,NBL1,SPN,SPP1,CD74"
GO: Biological Process	regulation of immune system process	1.25E-11	1.63E-09	71	1146	"FCER1G,PPARG,FIGF,NR4A1,HMOX1,SELL,SELE,CLU,ZC3H12A,F2RL1,WAS,HLA-DQA1,HLA-B,HLA-DMA,MBL2,CFP,LY96,IRAK3,IL4R,IL6R,IFNGR1,SOCS3,TLR7,COL3A1,PECAM1,CORO1A,CCL4,MAP3K8,FAS,CCL2,TYROBP,PDE4B,CTSS,FOS,CTSK,CTSH,MNDA,ICAM1,TGFB2,TGFB3,KLF10,THBS1,TNFAIP3,JAK3,BCL6,LRRC32,PRAM1,ITGB3,BMP4,SERPINE1,POLR3D,NLRC5,CXCL10,C1R,IL15RA,FSTL3,MYC,EDN1,CACNB3,NBL1,HCLS1,TARBP2,FOXP1,IRS2,RFTN1,LGALS1,CD4,SPN,ZBTB16,LAG3,CD74"
GO: Biological Process	blood vessel morphogenesis	2.13E-11	2.70E-09	42	492	"FIGF,NR4A1,HMOX1,ADM,SGPL1,ZC3H12A,ANG,ANXA3,SAT1,STAB2,COL8A1,CCL2,TNFRSF12A,FN1,ANGPT4,PLAU,CTSH,HSPG2,TGFBI,TGFB2,THBS1,KDR,GPR56,COL18A1,TNFAIP3,CYP1B1,JUNB,ITGB3,ITGAV,BMP4,SERPINE1,B4GALT1,RAMP2,CXCL10,EDN1,APOLD1,PTGS2,LOXL2,FZD5,EPAS1,EPHA1,SULF1"
GO: Biological Process	regulation of cell differentiation	2.31E-11	2.86E-09	75	1263	"FBN2,ABCA1,PPARG,FGF13,CEBPB,GDF6,TRPV4,PMP22,ADM,SEMA3F,AGER,COL1A1,ZC3H12A,HLA-DQA1,HLA-B,HLA-DMA,LDB2,IL4R,IL6R,COL14A1,MAN2A1,FRZB,SOCS3,COL3A1,IGFBP3,FAS,TYROBP,CYP26B1,TNFRSF12A,MAFF,FOS,MBNL3,TGIF1,TGFB2,TGFB3,KLF10,KDR,GHR,GPR56,JAK3,SSH3,JUNB,BCL6,ITGB3,ITGAV,BMP4,BMP2,B4GALT1,RAMP2,FZD7,DYNLT1,IL15RA,FSTL3,MYC,EDN1,EDNRB,APOLD1,PTGS2,ERRFI1,NBL1,LOXL2,HCLS1,RUNX2,ABCG1,FOXP1,KANK1,LGALS1,PDLIM5,SPP1,ZNF385A,ZBTB16,NGF,STAT3,CD74,ANKRD1"
GO: Biological Process	cytokine production	3.42E-11	4.14E-09	44	541	"FCER1G,ABCA1,PPARG,CEBPB,NLRP1,FIGF,HMOX1,FABP4,ZC3H12A,F2RL1,F2R,HLA-B,IRAK3,IL4R,IL6R,TLR7,CCL4,CCL2,PDE4B,IRF8,TGFB2,TGFB3,THBS1,GPR56,TNFAIP3,JAK3,BCL6,LRRC32,CLEC4M,SERPINE1,POLR3D,NLRC5,PTGS2,LITAF,C1QTNF3,HILPDA,IGF2BP1,FZD5,CD4,DTX4,SPN,SULF1,LAG3,CD74"
GO: Biological Process	regulation of cytokine production	4.74E-11	5.59E-09	41	484	"FCER1G,PPARG,CEBPB,NLRP1,FIGF,HMOX1,ZC3H12A,F2RL1,F2R,HLA-B,IRAK3,IL4R,IL6R,TLR7,CCL4,CCL2,PDE4B,IRF8,TGFB2,TGFB3,THBS1,TNFAIP3,JAK3,BCL6,LRRC32,CLEC4M,SERPINE1,POLR3D,NLRC5,PTGS2,LITAF,C1QTNF3,HILPDA,IGF2BP1,FZD5,CD4,DTX4,SPN,SULF1,LAG3,CD74"
GO: Biological Process	positive regulation of response to external stimulus	1.23E-10	1.42E-08	24	185	"FCER1G,FIGF,SELL,AGER,FABP4,F2RL1,ALOX5AP,IL6R,TLR7,CCL4,CCL2,PDE2A,FN1,OSMR,CTSS,TGM2,THBS1,KDR,LRRC32,SERPINE1,CXCL10,EDN1,PTGS2,CD74"
GO: Biological Process	positive regulation of cell proliferation	1.41E-10	1.59E-08	53	767	"FIGF,NR4A1,HMOX1,ADM,ADRA1D,AGER,FABP4,F2R,ALDH1A2,ANG,IL6R,S100A6,IGF1R,CORO1A,CCL2,OSMR,FOSL2,PLAU,CTSH,ATF3,TGM2,TGIF1,TGFB2,TIMP1,KDR,COL18A1,TNFAIP3,JAK3,BCL6,ITGB3,ITGAV,BMP4,BMP2,B4GALT1,FZD7,CXCL10,MYC,EDN1,EDNRB,SLC25A27,ACER2,PTGS2,HILPDA,HCLS1,RUNX2,FOXP1,IRS2,EPHA1,SPN,RAC2,NGF,EGR1,CD74"
GO: Biological Process	regulation of response to stress	1.46E-10	1.59E-08	59	910	"FCER1G,PPARG,NLRP1,TRPV4,SELE,AGER,IER3,FABP4,CLU,NEK6,F2RL1,F2R,HLA-B,ALOX5AP,MBL2,CFP,LY96,IRAK3,IFNGR1,SOCS3,TLR7,IGF1R,PDE2A,OSMR,CTSS,PLAT,FOS,PLAU,PLEK,CTSK,TGM2,TGFB2,THBS1,THBD,TNFAIP3,BCL6,LRRC32,SERPINE1,BMP2,POLR3D,NLRC5,FZD7,MYC,EDN1,EDNRB,PTGS2,C1QTNF3,TARBP2,FZD5,KANK1,RFTN1,CD4,SPN,SPP1,ZNF385A,LAG3,FBLN5,CD74,ANKRD1"
GO: Biological Process	positive regulation of immune system process	1.48E-10	1.59E-08	50	699	"FCER1G,FIGF,HMOX1,SELL,SELE,CLU,F2RL1,WAS,HLA-DQA1,HLA-B,HLA-DMA,MBL2,CFP,LY96,IRAK3,IL4R,IL6R,TLR7,PECAM1,CORO1A,CCL4,MAP3K8,CCL2,PDE4B,CTSS,FOS,CTSK,MNDA,ICAM1,TGFB2,THBS1,TNFAIP3,JAK3,BCL6,LRRC32,SERPINE1,POLR3D,CXCL10,C1R,IL15RA,EDN1,CACNB3,FOXP1,IRS2,RFTN1,LGALS1,CD4,SPN,LAG3,CD74"
GO: Biological Process	response to organic cyclic compound	3.20E-10	3.37E-08	48	669	"PPARG,CHRNB1,CDO1,FKBP1B,NR4A1,HMOX1,ADM,SELL,COL1A1,PRKAR2B,ALDH1A2,IRAK3,IL4R,IGF1R,FAS,CCL2,PDE2A,PDE4B,PLAT,FOS,ICAM1,TGFB2,TGFB3,THBS1,GHR,GNAL,RBM3,JUNB,NR4A3,DIAPH1,BMP4,BMP2,RAMP2,PAM,CXCL10,EDN1,EDNRB,PTGS2,LOX,BTG2,TARBP2,RFTN1,LGALS1,SPP1,NGF,EGR1,STAT3,ANKRD1"
GO: Biological Process	response to molecule of bacterial origin	3.67E-10	3.79E-08	27	245	"ABCA1,CEBPB,ADM,SELE,ZC3H12A,F2R,LY96,IRAK3,CCL2,PDE4B,MGST1,IRF8,FOS,ICAM1,DCN,TNFAIP3,ITGAV,SERPINE1,CXCL10,EDN1,EDNRB,PTGS2,LITAF,FZD5,LCN2,NGF,ANKRD1"
GO: Biological Process	anatomical structure formation involved in morphogenesis	7.36E-10	7.44E-08	59	949	"FBN2,FIGF,PMP22,NR4A1,HMOX1,ADM,COL1A1,ZC3H12A,ANG,BCL2L11,ANXA3,SAT1,STAB2,COL8A1,FZD2,CCL2,TNFRSF12A,FN1,ANGPT4,PLAU,CTSH,HSPG2,RDH10,TGM2,TGIF1,TGFBI,TGFB2,THBS1,KDR,GPR56,COL18A1,TNFAIP3,CYP1B1,TNNT2,JUNB,NR4A3,ITGB3,ITGAV,BMP4,SERPINE1,BMP2,B4GALT1,RAMP2,FZD7,CXCL10,EDN1,FJX1,APOLD1,PTGS2,LOXL2,FZD5,EPAS1,FOXP1,EPHA1,LFNG,CD9,SULF1,ZNF385A,ANKRD1"
GO: Biological Process	leukocyte activation	8.02E-10	7.95E-08	46	642	"FCER1G,FKBP1B,HMOX1,CPLX2,ZC3H12A,F2RL1,WAS,HLA-DQA1,HLA-DMA,ANXA3,IL4R,TLR7,CORO1A,MAP3K8,FAS,CCL2,TYROBP,MNDA,WWP1,ICAM1,RELB,THBS1,TNFAIP3,JAK3,BCL6,LRRC32,PRAM1,ITGAV,BMP4,FZD7,IL15RA,EDN1,SWAP70,RUNX2,FZD5,FOXP1,IRS2,LCP1,TNFSF8,LGALS1,ELF4,CD4,SPN,LAG3,EGR1,CD74"
GO: Biological Process	positive regulation of multicellular organismal process	9.40E-10	9.13E-08	47	668	"FBN2,FCER1G,NLRP1,FIGF,HMOX1,ADM,ADRA1D,F2RL1,F2R,GPIHBP1,IL4R,IL6R,TLR7,CCL4,CCL2,PDE4B,IRF8,PLAT,PLAU,ICAM1,TGFB2,TGFB3,THBS1,THBD,GHR,ITGB3,BMP4,SERPINE1,BMP2,POLR3D,B4GALT1,GSTO1,MYC,EDN1,EDNRB,ECE1,PTGS2,HILPDA,RUNX2,FZD5,LAMA2,DTX4,SULF1,SPP1,ZBTB16,EGR1,CD74"
GO: Biological Process	multi-organism process	1.47E-09	1.40E-07	78	1464	"FCER1G,ABCA1,ACTA2,CEBPB,NLRP1,ADARB1,ADM,SELE,IER3,CLU,ZC3H12A,F2RL1,F2R,HLA-B,CLDN1,MBL2,BCL2L11,CFP,LY96,ANXA3,IRAK3,IL4R,STAB2,IL6R,UMPS,IFNGR1,TLR7,CCL4,CCL2,PDE4B,MGST1,IRF8,CXCL9,MAFF,FOS,RPL29,WWP1,RPS20,RPS27,ICAM1,DCN,TGFB3,THBD,TIMP1,KDR,TNFAIP3,CYBB,JUNB,LRRC32,CLEC4M,ITGB3,ITGAV,SERPINE1,POLR3D,B4GALT1,RAMP2,NLRC5,PAM,DYNLT1,CXCL10,GBP1,MYC,EDN1,EDNRB,PTGS2,TMEM181,LITAF,TARBP2,FZD5,TNFSF8,CD4,SPN,ZYX,LCN2,SPP1,NGF,STAT3,ANKRD1"
GO: Biological Process	wound healing	1.52E-09	1.42E-07	46	655	"FCER1G,ENPP4,FIGF,HMOX1,SELL,SELE,COL1A1,PRKAR2B,PRCP,CLU,F2RL1,F2R,WAS,COL5A1,COL3A1,PECAM1,PDE2A,FN1,ANGPT4,MAFF,PLAT,PLAU,PLEK,ATP1B1,DCN,TGFB2,TGFB3,SLC7A5,THBS1,THBD,TIMP1,TNFAIP3,ITGB3,ITGAV,SERPINE1,ITGA6,B4GALT1,FZD7,MYC,EDN1,LOX,KANK1,ENO3,CD9,SPN,RAC2"
GO: Biological Process	response to lipopolysaccharide	2.03E-09	1.86E-07	25	229	"ABCA1,CEBPB,ADM,SELE,ZC3H12A,F2R,LY96,IRAK3,CCL2,PDE4B,MGST1,IRF8,FOS,ICAM1,DCN,TNFAIP3,SERPINE1,CXCL10,EDN1,EDNRB,PTGS2,LITAF,LCN2,NGF,ANKRD1"
GO: Biological Process	cell chemotaxis	2.31E-09	2.08E-07	22	180	"FCER1G,DOCK4,HOXB9,FIGF,NR4A1,SELL,F2RL1,IL6R,CORO1A,CCL4,CCL2,PDE4B,TGFB2,THBS1,SERPINE1,CXCL10,EDN1,EDNRB,NBL1,SPP1,CXCL1,CD74"
GO: Biological Process	negative regulation of cell proliferation	3.96E-09	3.50E-07	43	606	"PPARG,CDKN2C,ADARB1,PMP22,HMOX1,ADM,AGER,F2R,HLA-DQA1,ALDH1A2,ANG,FRZB,IGFBP3,PTPRU,MNDA,TGIF1,TGFB2,TGFB3,KLF10,IFI30,THBS1,RERG,GPR56,COL18A1,TNFAIP3,OGN,BCL6,LRRC32,BMP4,BMP2,B4GALT1,MYC,PTGS2,BTG2,FZD5,CD33,CD9,SPN,SULF1,ZBTB16,CXCL1,CDH5,STAT3"
GO: Biological Process	leukocyte differentiation	4.72E-09	4.11E-07	34	413	"PPARG,F2RL1,HLA-DQA1,HLA-B,HLA-DMA,IL4R,FAS,TYROBP,PDE2A,FOS,WWP1,RELB,KLF10,TNFAIP3,JAK3,JUNB,BCL6,ITGB3,BMP4,FZD7,IL15RA,FSTL3,MYC,HCLS1,RUNX2,FZD5,FOXP1,TNFSF8,LGALS1,CD4,SPN,SPIB,EGR1,CD74"
GO: Biological Process	immune effector process	4.82E-09	4.11E-07	43	610	"FCER1G,ADARB1,HMOX1,CPLX2,CLU,F2RL1,WAS,HLA-B,HLA-DMA,MBL2,CFP,ANXA3,IRAK3,IL4R,IL6R,TLR7,FAS,CCL2,TYROBP,CXCL9,CTSH,ICAM1,RELB,TGFB2,TGFB3,TNFAIP3,JAK3,BCL6,PRAM1,POLR3D,NLRC5,CXCL10,C1R,GBP1,SWAP70,TARBP2,FOXP1,LCP1,LGALS1,CD4,SPN,LAG3,CD74"
GO: Biological Process	response to oxygen levels	5.30E-09	4.45E-07	26	258	"SOD3,HMOX1,ADM,ANG,FAS,CCL2,ANGPT4,PLAT,PLAU,PDLIM1,ATP1B1,ICAM1,TGFB2,TGFB3,THBS1,BMP2,RAMP2,PAM,EDN1,ECE1,APOLD1,PTGS2,LOXL2,EPAS1,EGR1,ANKRD1"
GO: Biological Process	response to hypoxia	6.33E-09	5.23E-07	25	242	"SOD3,HMOX1,ADM,ANG,CCL2,ANGPT4,PLAT,PLAU,PDLIM1,ATP1B1,ICAM1,TGFB2,TGFB3,THBS1,BMP2,RAMP2,PAM,EDN1,ECE1,APOLD1,PTGS2,LOXL2,EPAS1,EGR1,ANKRD1"
GO: Biological Process	negative regulation of immune system process	8.08E-09	6.50E-07	24	227	"HMOX1,ZC3H12A,F2RL1,HLA-DQA1,HLA-B,IRAK3,IL4R,COL3A1,FAS,CCL2,MNDA,TGFB2,TGFB3,THBS1,TNFAIP3,JAK3,BCL6,LRRC32,BMP4,NBL1,TARBP2,SPN,LAG3,CD74"
GO: Biological Process	response to decreased oxygen levels	8.13E-09	6.50E-07	25	245	"SOD3,HMOX1,ADM,ANG,CCL2,ANGPT4,PLAT,PLAU,PDLIM1,ATP1B1,ICAM1,TGFB2,TGFB3,THBS1,BMP2,RAMP2,PAM,EDN1,ECE1,APOLD1,PTGS2,LOXL2,EPAS1,EGR1,ANKRD1"
GO: Biological Process	leukocyte chemotaxis	9.05E-09	7.11E-07	19	145	"FCER1G,FIGF,SELL,F2RL1,IL6R,CORO1A,CCL4,CCL2,PDE4B,TGFB2,THBS1,SERPINE1,CXCL10,EDN1,EDNRB,NBL1,SPP1,CXCL1,CD74"
GO: Biological Process	hemopoiesis	9.42E-09	7.29E-07	43	624	"PPARG,SGPL1,F2RL1,HLA-DQA1,HLA-B,HLA-DMA,IL4R,FAS,TYROBP,PDE2A,IRF8,FOS,PLEK,WWP1,RELB,TGFB2,KLF10,TIMP1,KDR,TNFAIP3,JAK3,JUNB,BCL6,ITGB3,BMP4,FZD7,IL15RA,FSTL3,MYC,HCLS1,RUNX2,FZD5,EPAS1,FOXP1,TNFSF8,LGALS1,CD4,SPN,SPIB,ZNF385A,ZBTB16,EGR1,CD74"
GO: Biological Process	response to drug	1.22E-08	9.32E-07	32	387	"PPARG,ABCG5,PRKAR2B,ABCB1,UMPS,CCL2,PDE2A,PDE4B,CTPS1,MGST1,FOS,ICAM1,TGIF1,TGFB2,THBS1,CYP4B1,CYBB,JUNB,PAM,MYC,EDN1,ACER2,PTGS2,LOX,DPEP1,ENO3,LGALS1,LCN2,NGF,EGR1,STAT3,ANKRD1"
GO: Biological Process	regulation of cell adhesion	1.25E-08	9.37E-07	28	307	"AGER,COL1A1,COL8A1,PLAU,ADAM22,ICAM1,TGM2,TGFBI,TGFB2,THBS1,CYTH1,KDR,GPR56,TNFAIP3,BCL6,ITGAV,SERPINE1,BMP2,ITGA6,FZD7,FSTL3,ACER2,EPHA1,KANK1,LGALS1,LAMA2,SPN,SPP1"
GO: Biological Process	response to endogenous stimulus	1.30E-08	9.61E-07	69	1290	"FBN2,ABCA1,PPARG,CHRNB1,CDO1,CEBPB,NLRP1,NR4A1,HMOX1,ADM,SELL,COL1A1,PRKAR2B,ALDH1A2,GPIHBP1,ANG,IRAK3,PPP1R15A,IL4R,SOCS3,IGF1R,COL3A1,FAS,CCL2,PDE2A,PDE4B,MGST1,CTSS,PLAT,FOS,CTSH,MMP3,ICAM1,TGIF1,TGFB2,TGFB3,KLF10,THBS1,TIMP1,PMEPA1,GHR,RERG,TNFAIP3,GNAL,JAK3,JUNB,NR4A3,DIAPH1,BMP4,SERPINE1,BMP2,RAMP2,PAM,MYC,EDN1,PTGS2,LOX,BTG2,HCLS1,RUNX2,ABCG1,IRS2,KANK1,SULF1,SPP1,NGF,EGR1,STAT3,ANKRD1"
GO: Biological Process	immune system development	1.32E-08	9.62E-07	46	702	"PPARG,SGPL1,F2RL1,HLA-DQA1,HLA-B,HLA-DMA,BCL2L11,IRAK3,IL4R,FAS,TYROBP,PDE2A,IRF8,FOS,PLEK,WWP1,RELB,TGFB2,KLF10,TIMP1,KDR,TNFAIP3,JAK3,JUNB,BCL6,ITGB3,BMP4,FZD7,IL15RA,FSTL3,MYC,SWAP70,HCLS1,RUNX2,FZD5,EPAS1,FOXP1,TNFSF8,LGALS1,CD4,SPN,SPIB,ZNF385A,ZBTB16,EGR1,CD74"
GO: Biological Process	negative regulation of locomotion	1.66E-08	1.19E-06	21	183	"ADARB1,HMOX1,SEMA3F,AGER,COL3A1,IGFBP3,PTPRU,CCL2,ANGPT4,THBS1,TIMP1,GPR56,ITGAV,SERPINE1,ARRDC3,NBL1,DPEP1,EPHA1,KANK1,SULF1,STAT3"
GO: Biological Process	hematopoietic or lymphoid organ development	1.92E-08	1.36E-06	44	663	"PPARG,SGPL1,F2RL1,HLA-DQA1,HLA-B,HLA-DMA,BCL2L11,IL4R,FAS,TYROBP,PDE2A,IRF8,FOS,PLEK,WWP1,RELB,TGFB2,KLF10,TIMP1,KDR,TNFAIP3,JAK3,JUNB,BCL6,ITGB3,BMP4,FZD7,IL15RA,FSTL3,MYC,HCLS1,RUNX2,FZD5,EPAS1,FOXP1,TNFSF8,LGALS1,CD4,SPN,SPIB,ZNF385A,ZBTB16,EGR1,CD74"
GO: Biological Process	positive regulation of developmental process	2.08E-08	1.45E-06	51	835	"FBN2,PPARG,CEBPB,GDF6,HMOX1,ADM,AGER,COL1A1,ZC3H12A,HLA-DQA1,HLA-DMA,ANXA3,IL4R,IL6R,MAN2A1,FRZB,SOCS3,IGFBP3,CYP26B1,TNFRSF12A,ANGPT4,FOS,CTSH,TGIF1,TGFB2,TGFB3,KLF10,THBS1,KDR,GHR,JUNB,ITGB3,BMP4,SERPINE1,BMP2,B4GALT1,RAMP2,IL15RA,MYC,EDN1,PTGS2,NBL1,LOXL2,HCLS1,RUNX2,FOXP1,EPHA1,ZNF385A,ZBTB16,NGF,CD74"
GO: Biological Process	regulation of defense response	2.52E-08	1.73E-06	38	530	"FCER1G,PPARG,NLRP1,SELE,AGER,IER3,FABP4,F2RL1,HLA-B,ALOX5AP,MBL2,CFP,LY96,IRAK3,IFNGR1,SOCS3,TLR7,PDE2A,OSMR,CTSS,FOS,CTSK,TGM2,TNFAIP3,BCL6,LRRC32,SERPINE1,POLR3D,NLRC5,EDNRB,PTGS2,C1QTNF3,TARBP2,RFTN1,CD4,SPN,LAG3,CD74"
GO: Biological Process	regulation of leukocyte migration	3.02E-08	2.05E-06	16	110	"FIGF,HMOX1,SELL,SELE,F2RL1,IL6R,PECAM1,CCL4,CCL2,ICAM1,THBS1,SERPINE1,CXCL10,EDN1,NBL1,CD74"
GO: Biological Process	positive regulation of leukocyte migration	3.23E-08	2.15E-06	14	83	"FIGF,SELL,SELE,F2RL1,IL6R,PECAM1,CCL4,CCL2,ICAM1,THBS1,SERPINE1,CXCL10,EDN1,CD74"
GO: Biological Process	response to cytokine	3.26E-08	2.15E-06	40	581	"PPARG,SELE,TNFRSF19,F2RL1,HLA-DQA1,HLA-B,ALDH1A2,IRAK3,IL4R,IL6R,IFNGR1,SOCS3,COL3A1,CORO1A,FAS,CCL2,PDE2A,IRF8,FN1,OSMR,FOS,ICAM1,IFI30,TIMP1,GHR,JAK3,JUNB,NLRC5,IL15RA,GBP1,EDN1,PTGS2,PXDN,HCLS1,LCN2,EGR1,AFF3,STAT3,CD74,ANKRD1"
GO: Biological Process	response to inorganic substance	3.40E-08	2.22E-06	31	383	"PPARG,SOD3,FKBP1B,NR4A1,HMOX1,MT1H,COL1A1,FABP4,ALOX5AP,CP,FAS,FN1,FOS,ICAM1,THBS1,TNFAIP3,TNNT2,JUNB,NR4A3,ITGAV,PAM,FSTL3,PTGS2,PXDN,LOXL2,DPEP1,GPX3,CD9,LCN2,NGF,FBLN5"
GO: Biological Process	positive regulation of cell differentiation	3.70E-08	2.38E-06	41	607	"FBN2,PPARG,CEBPB,GDF6,ADM,AGER,COL1A1,ZC3H12A,HLA-DQA1,HLA-DMA,IL4R,IL6R,MAN2A1,FRZB,SOCS3,IGFBP3,CYP26B1,TNFRSF12A,FOS,TGIF1,TGFB2,TGFB3,KLF10,KDR,GHR,JUNB,ITGB3,BMP4,BMP2,RAMP2,IL15RA,PTGS2,NBL1,LOXL2,HCLS1,RUNX2,FOXP1,ZNF385A,ZBTB16,NGF,CD74"
GO: Biological Process	hemostasis	5.74E-08	3.64E-06	37	524	"FCER1G,ENPP4,FIGF,SELL,SELE,COL1A1,PRKAR2B,PRCP,CLU,F2RL1,F2R,WAS,COL3A1,PECAM1,PDE2A,FN1,ANGPT4,MAFF,PLAT,PLAU,PLEK,ATP1B1,TGFB2,TGFB3,SLC7A5,THBS1,THBD,TIMP1,ITGB3,ITGAV,SERPINE1,ITGA6,EDN1,CD9,SPN,RAC2,ZNF385A"
GO: Biological Process	chemotaxis	7.28E-08	4.57E-06	42	646	"FCER1G,DOCK4,HOXB9,FIGF,NR4A1,SELL,SEMA3F,AGER,F2RL1,IL6R,COL5A1,COL3A1,CORO1A,CCL17,CCL4,CCL2,TYROBP,PDE4B,CXCL9,FN1,PLAU,TGFB2,THBS1,KDR,SPON2,NR4A3,ITGB3,ITGAV,BMP4,SERPINE1,CXCL10,EDN1,EDNRB,CACNB3,NBL1,FOXP1,LAMA2,SPN,RAC2,SPP1,CXCL1,CD74"
GO: Biological Process	taxis	7.60E-08	4.71E-06	42	647	"FCER1G,DOCK4,HOXB9,FIGF,NR4A1,SELL,SEMA3F,AGER,F2RL1,IL6R,COL5A1,COL3A1,CORO1A,CCL17,CCL4,CCL2,TYROBP,PDE4B,CXCL9,FN1,PLAU,TGFB2,THBS1,KDR,SPON2,NR4A3,ITGB3,ITGAV,BMP4,SERPINE1,CXCL10,EDN1,EDNRB,CACNB3,NBL1,FOXP1,LAMA2,SPN,RAC2,SPP1,CXCL1,CD74"
GO: Biological Process	regulation of anatomical structure morphogenesis	1.08E-07	6.63E-06	44	704	"FGF13,HMOX1,ADM,SEMA3F,AGER,COL1A1,ANXA3,FBLIM1,CORO1A,FZD2,CCL2,TNFRSF12A,FN1,ANGPT4,PLAU,CTSH,INF2,ICAM1,TGIF1,TGFB2,TGFB3,THBS1,KDR,TNFAIP3,SSH3,DIAPH1,BMP4,SERPINE1,BMP2,B4GALT1,RAMP2,FZD7,CXCL10,MYC,EDN1,PTGS2,RUNX2,EPHA1,KANK1,LFNG,PDLIM5,SULF1,SPP1,NGF"
GO: Biological Process	response to steroid hormone	1.18E-07	7.10E-06	28	341	"PPARG,CDO1,NR4A1,HMOX1,ADM,COL1A1,ALDH1A2,IL4R,FAS,CCL2,PLAT,FOS,TGFB2,TGFB3,THBS1,GHR,JUNB,NR4A3,BMP4,RAMP2,PAM,EDN1,PTGS2,LOX,SPP1,NGF,EGR1,STAT3"
GO: Biological Process	T cell activation	1.24E-07	7.31E-06	30	384	"FKBP1B,F2RL1,WAS,HLA-DQA1,HLA-DMA,IL4R,CORO1A,MAP3K8,FAS,CCL2,WWP1,ICAM1,RELB,JAK3,BCL6,LRRC32,ITGAV,BMP4,FZD7,RUNX2,FZD5,LCP1,TNFSF8,LGALS1,ELF4,CD4,SPN,LAG3,EGR1,CD74"
GO: Biological Process	positive regulation of chemotaxis	1.24E-07	7.31E-06	14	92	"FIGF,SELL,AGER,F2RL1,IL6R,CCL4,CCL2,FN1,THBS1,KDR,SERPINE1,CXCL10,EDN1,CD74"
GO: Biological Process	homeostatic process	1.25E-07	7.31E-06	66	1284	"FCER1G,ABCA1,PPARG,GPR116,HOXB6,CD52,TRPV4,FKBP1B,HMOX1,ADM,ABCG5,MT1H,AGER,FABP4,F2RL1,F2R,MTNR1B,LDB2,GPIHBP1,ANG,CP,BCL2L11,COL14A1,CORO1A,FZD2,FAS,CCL2,PDE4B,CTSS,CTSK,CTSH,ICAM1,TGM2,CLN6,TGFB2,TIMP1,SFXN3,KDR,TNFAIP3,HMGN3,JAK3,BCL6,ITGB3,ITGAV,DIAPH1,BMP4,DYNLT1,GSTO1,MYC,EDN1,EDNRB,SLC25A27,ARRDC3,PTGS2,C1QTNF3,HCLS1,EPAS1,ABCG1,IRS2,LGALS1,LCN2,RAC2,SPP1,CXCL1,STAT3,CD74"
GO: Biological Process	regulation of chemotaxis	1.33E-07	7.69E-06	16	122	"FIGF,SELL,SEMA3F,AGER,F2RL1,IL6R,CCL4,CCL2,FN1,THBS1,KDR,SERPINE1,CXCL10,EDN1,NBL1,CD74"
GO: Biological Process	blood coagulation	1.36E-07	7.72E-06	36	519	"FCER1G,ENPP4,FIGF,SELL,SELE,COL1A1,PRKAR2B,PRCP,CLU,F2RL1,F2R,WAS,COL3A1,PECAM1,PDE2A,FN1,ANGPT4,MAFF,PLAT,PLAU,PLEK,ATP1B1,TGFB2,TGFB3,SLC7A5,THBS1,THBD,TIMP1,ITGB3,ITGAV,SERPINE1,ITGA6,EDN1,CD9,SPN,RAC2"
GO: Biological Process	cell-substrate adhesion	1.51E-07	8.47E-06	23	245	"COL1A1,BCL2L11,COL8A1,COL3A1,CORO1A,TNFRSF12A,FN1,PLAU,RPL29,THBS1,KDR,BCL6,ITGB3,ITGAV,SERPINE1,ITGA6,FZD7,ACER2,EPHA1,KANK1,LGALS1,SPP1,FBLN5"
GO: Biological Process	coagulation	1.56E-07	8.69E-06	36	522	"FCER1G,ENPP4,FIGF,SELL,SELE,COL1A1,PRKAR2B,PRCP,CLU,F2RL1,F2R,WAS,COL3A1,PECAM1,PDE2A,FN1,ANGPT4,MAFF,PLAT,PLAU,PLEK,ATP1B1,TGFB2,TGFB3,SLC7A5,THBS1,THBD,TIMP1,ITGB3,ITGAV,SERPINE1,ITGA6,EDN1,CD9,SPN,RAC2"
GO: Biological Process	positive regulation of signaling	1.70E-07	9.38E-06	57	1050	"PLEKHF1,GDF6,HMOX1,COL1A1,TNFRSF19,CLU,NEK6,F2RL1,F2R,BCL2L11,LY96,IL6R,IGF1R,COL3A1,IGFBP3,PECAM1,CCL4,FAS,CCL2,TNFRSF12A,CTSH,TGM2,TGFB2,TGFB3,THBS1,KDR,GHR,GPR56,JAK3,ITGB3,ITGAV,BMP4,BMP2,NLRC5,FZD7,MYC,EDN1,ECE1,ARRDC3,PTGS2,LITAF,C1QTNF3,HCLS1,AKAP12,FZD5,KANK1,LFNG,LGALS1,CD4,LAMA2,SULF1,ZNF385A,NGF,EGR1,STAT3,CD74,ANKRD1"
GO: Biological Process	regulation of inflammatory response	1.74E-07	9.49E-06	23	247	"FCER1G,PPARG,NLRP1,SELE,AGER,IER3,FABP4,ALOX5AP,MBL2,CFP,TLR7,PDE2A,OSMR,CTSS,TGM2,TNFAIP3,BCL6,LRRC32,SERPINE1,EDNRB,PTGS2,C1QTNF3,SPN"
GO: Biological Process	negative regulation of cell migration	1.78E-07	9.60E-06	18	157	"ADARB1,HMOX1,AGER,COL3A1,IGFBP3,PTPRU,CCL2,ANGPT4,THBS1,TIMP1,GPR56,SERPINE1,NBL1,DPEP1,EPHA1,KANK1,SULF1,STAT3"
GO: Biological Process	response to nitrogen compound	1.90E-07	1.01E-05	45	743	"PPARG,CHRNB1,CDO1,CEBPB,NLRP1,HMOX1,ADM,SELL,COL1A1,PRKAR2B,GPIHBP1,IRAK3,SOCS3,IGF1R,COL3A1,CCL2,PDE2A,PDE4B,MGST1,PLAT,FOS,MMP3,ICAM1,TIMP1,GHR,TNFAIP3,GNAL,RBM3,JAK3,JUNB,NR4A3,ITGAV,DIAPH1,MYC,EDN1,PTGS2,BTG2,TARBP2,DPEP1,IRS2,KANK1,RFTN1,NGF,EGR1,STAT3"
GO: Biological Process	positive regulation of cell communication	1.99E-07	1.05E-05	57	1055	"PLEKHF1,GDF6,HMOX1,COL1A1,TNFRSF19,CLU,NEK6,F2RL1,F2R,BCL2L11,LY96,IL6R,IGF1R,COL3A1,IGFBP3,PECAM1,CCL4,FAS,CCL2,TNFRSF12A,CTSH,TGM2,TGFB2,TGFB3,THBS1,KDR,GHR,GPR56,JAK3,ITGB3,ITGAV,BMP4,BMP2,NLRC5,FZD7,MYC,EDN1,ECE1,ARRDC3,PTGS2,LITAF,C1QTNF3,HCLS1,AKAP12,FZD5,KANK1,LFNG,LGALS1,CD4,LAMA2,SULF1,ZNF385A,NGF,EGR1,STAT3,CD74,ANKRD1"
GO: Biological Process	myeloid leukocyte cytokine production	2.09E-07	1.09E-05	7	18	"FCER1G,HMOX1,IRAK3,TGFB2,TGFB3,BCL6,CD74"
GO: Biological Process	endothelial cell proliferation	2.14E-07	1.11E-05	14	96	"NR4A1,HMOX1,AGER,ALDH1A2,ANG,CCL2,ANGPT4,THBS1,KDR,ITGB3,BMP4,BMP2,LOXL2,SULF1"
GO: Biological Process	regulation of cell death	2.27E-07	1.16E-05	69	1389	"FCER1G,PLEKHF1,PPARG,CEBPB,NLRP1,NR4A1,HMOX1,ADM,SELL,AGER,IER3,CLU,F2R,ALDH1A2,ABCB1,BCL2L11,IRAK3,FRZB,SOCS3,IGF1R,IGFBP3,FAS,CCL2,TNFRSF12A,FN1,ANGPT4,CTSH,MNDA,PIM1,TGM2,TGFB2,TGFB3,THBS1,TIMP1,KDR,GHR,COL18A1,TNFAIP3,JAK3,TMEM132A,BCL6,NR4A3,ITGAV,BMP4,SERPINE1,BMP2,ITGA6,B4GALT1,RAMP2,MYC,EDN1,EDNRB,SLC25A27,ACER2,PTGS2,BTG2,HCLS1,DPEP1,IRS2,LGALS1,LCN2,SPP1,ZNF385A,ZBTB16,NGF,EGR1,STAT3,CD74,ANKRD1"
GO: Biological Process	organ morphogenesis	2.35E-07	1.19E-05	50	876	"FBN2,PERP,HOXB6,HOXD10,ADM,COL1A1,PRKAR2B,SGPL1,ALDH1A2,BCL2L11,FAM20A,MAN2A1,FRZB,COL5A1,COL8A1,IGF1R,FZD2,CCL2,CYP26B1,PLAU,CTSH,HSPG2,RDH10,DCN,TGFB2,TGFB3,FAT4,THBS1,GHR,COL18A1,TNFAIP3,TNNT2,NR4A3,ITGAV,BMP4,BMP2,ITGA6,PAM,MYC,EDN1,FJX1,ERRFI1,NAGLU,LY6E,RUNX2,LFNG,ELN,SULF1,STAT3,ANKRD1"
GO: Biological Process	regulation of leukocyte chemotaxis	2.60E-07	1.29E-05	12	70	"FIGF,SELL,F2RL1,IL6R,CCL4,CCL2,THBS1,SERPINE1,CXCL10,EDN1,NBL1,CD74"
GO: Biological Process	negative regulation of cell motility	2.61E-07	1.29E-05	18	161	"ADARB1,HMOX1,AGER,COL3A1,IGFBP3,PTPRU,CCL2,ANGPT4,THBS1,TIMP1,GPR56,SERPINE1,NBL1,DPEP1,EPHA1,KANK1,SULF1,STAT3"
GO: Biological Process	cell-type specific apoptotic process	2.69E-07	1.32E-05	31	420	"FCER1G,CEBPB,GDF6,NLRP1,HMOX1,AGER,F2R,BCL2L11,IGF1R,FAS,CCL2,TGFB2,TGFB3,THBS1,KDR,COL18A1,TNFAIP3,JAK3,BCL6,NR4A3,BMP4,SERPINE1,RAMP2,MYC,EDN1,BTG2,HCLS1,IRS2,NGF,EGR1,CD74"
GO: Biological Process	innate immune response	2.95E-07	1.43E-05	48	831	"FCER1G,PPARG,NLRP1,ADARB1,NR4A1,AGER,PRKAR2B,CLU,F2RL1,WAS,HLA-DQA1,HLA-B,MBL2,CFP,LY96,IRAK3,IFNGR1,SOCS3,TLR7,CORO1A,CCL2,TYROBP,IRF8,CTSS,FOS,CTSK,ICAM1,CLEC10A,IFI30,TNFAIP3,SPON2,CYBB,JAK3,LRRC32,CLEC4M,POLR3D,NLRC5,C1R,GBP1,IRS2,RFTN1,LGALS3,CD4,DTX4,LCN2,LAG3,EGR1,CD74"
GO: Biological Process	lymphocyte activation	2.98E-07	1.43E-05	36	536	"FKBP1B,F2RL1,WAS,HLA-DQA1,HLA-DMA,IL4R,CORO1A,MAP3K8,FAS,CCL2,MNDA,WWP1,ICAM1,RELB,TNFAIP3,JAK3,BCL6,LRRC32,ITGAV,BMP4,FZD7,IL15RA,SWAP70,RUNX2,FZD5,FOXP1,IRS2,LCP1,TNFSF8,LGALS1,ELF4,CD4,SPN,LAG3,EGR1,CD74"
GO: Biological Process	platelet degranulation	3.30E-07	1.57E-05	13	85	"FCER1G,FIGF,CLU,PECAM1,FN1,PLEK,TGFB2,TGFB3,THBS1,TIMP1,ITGB3,SERPINE1,CD9"
GO: Biological Process	positive regulation of leukocyte chemotaxis	3.39E-07	1.60E-05	11	59	"FIGF,SELL,F2RL1,IL6R,CCL4,CCL2,THBS1,SERPINE1,CXCL10,EDN1,CD74"
GO: Biological Process	regulation of body fluid levels	3.90E-07	1.82E-05	40	638	"FCER1G,CDO1,ENPP4,FIGF,SELL,SELE,COL1A1,PRKAR2B,PRCP,CLU,F2RL1,F2R,WAS,UMPS,COL3A1,PECAM1,PDE2A,FN1,ANGPT4,MAFF,PLAT,PLAU,PLEK,ATP1B1,TGFB2,TGFB3,SLC7A5,THBS1,THBD,TIMP1,ITGB3,ITGAV,SERPINE1,ITGA6,EDN1,EDNRB,CD9,SPN,RAC2,ZNF385A"
GO: Biological Process	negative regulation of cellular component movement	4.53E-07	2.10E-05	18	167	"ADARB1,HMOX1,AGER,COL3A1,IGFBP3,PTPRU,CCL2,ANGPT4,THBS1,TIMP1,GPR56,SERPINE1,NBL1,DPEP1,EPHA1,KANK1,SULF1,STAT3"
GO: Biological Process	negative regulation of cell adhesion	4.60E-07	2.11E-05	14	102	"AGER,COL1A1,ADAM22,TGFBI,THBS1,TNFAIP3,BCL6,SERPINE1,BMP2,FZD7,ACER2,KANK1,LGALS1,SPN"
GO: Biological Process	negative regulation of cytokine production involved in immune response	4.76E-07	2.16E-05	6	13	"HMOX1,IRAK3,TGFB2,TGFB3,JAK3,BCL6"
GO: Biological Process	regulation of programmed cell death	4.86E-07	2.19E-05	66	1333	"FCER1G,PLEKHF1,PPARG,CEBPB,NLRP1,NR4A1,HMOX1,ADM,SELL,AGER,IER3,CLU,F2R,ALDH1A2,BCL2L11,IRAK3,FRZB,SOCS3,IGF1R,IGFBP3,FAS,CCL2,TNFRSF12A,FN1,ANGPT4,CTSH,MNDA,PIM1,TGM2,TGFB2,TGFB3,THBS1,TIMP1,KDR,COL18A1,TNFAIP3,JAK3,TMEM132A,BCL6,NR4A3,ITGAV,BMP4,SERPINE1,BMP2,ITGA6,B4GALT1,RAMP2,MYC,EDN1,EDNRB,SLC25A27,ACER2,PTGS2,BTG2,HCLS1,DPEP1,IRS2,LGALS1,LCN2,SPP1,ZNF385A,ZBTB16,NGF,EGR1,CD74,ANKRD1"
GO: Biological Process	myeloid leukocyte migration	5.54E-07	2.48E-05	15	119	"FCER1G,FIGF,SELL,IL6R,CCL2,PDE4B,TGFB2,THBS1,SERPINE1,EDN1,EDNRB,NBL1,SPP1,CXCL1,CD74"
GO: Biological Process	regulation of immune response	6.37E-07	2.82E-05	45	776	"FCER1G,PPARG,NR4A1,HMOX1,SELL,CLU,F2RL1,WAS,HLA-DQA1,HLA-B,HLA-DMA,MBL2,CFP,LY96,IRAK3,IL4R,IFNGR1,SOCS3,TLR7,COL3A1,TYROBP,PDE4B,CTSS,FOS,CTSK,CTSH,MNDA,ICAM1,TGFB2,TGFB3,TNFAIP3,JAK3,BCL6,LRRC32,PRAM1,POLR3D,NLRC5,C1R,CACNB3,IRS2,RFTN1,CD4,SPN,LAG3,CD74"
GO: Biological Process	multicellular organismal metabolic process	6.68E-07	2.93E-05	16	137	"AGER,COL1A1,F2R,IL6R,COL14A1,COL12A1,COL5A1,COL8A1,COL3A1,CTSK,MMP3,TGFB3,GHR,COL18A1,BMP4,ARRDC3"
GO: Biological Process	regulation of apoptotic process	7.08E-07	3.08E-05	65	1319	"FCER1G,PLEKHF1,PPARG,CEBPB,NLRP1,NR4A1,HMOX1,ADM,SELL,AGER,IER3,CLU,F2R,ALDH1A2,BCL2L11,IRAK3,FRZB,SOCS3,IGF1R,IGFBP3,FAS,CCL2,TNFRSF12A,FN1,ANGPT4,CTSH,MNDA,PIM1,TGM2,TGFB2,TGFB3,THBS1,TIMP1,KDR,COL18A1,TNFAIP3,JAK3,BCL6,NR4A3,ITGAV,BMP4,SERPINE1,BMP2,ITGA6,B4GALT1,RAMP2,MYC,EDN1,EDNRB,SLC25A27,ACER2,PTGS2,BTG2,HCLS1,DPEP1,IRS2,LGALS1,LCN2,SPP1,ZNF385A,ZBTB16,NGF,EGR1,CD74,ANKRD1"
GO: Biological Process	positive regulation of signal transduction	8.06E-07	3.47E-05	53	993	"PLEKHF1,GDF6,HMOX1,COL1A1,TNFRSF19,CLU,NEK6,F2RL1,F2R,BCL2L11,LY96,IL6R,IGF1R,COL3A1,IGFBP3,PECAM1,CCL4,FAS,TNFRSF12A,CTSH,TGM2,TGFB2,TGFB3,THBS1,KDR,GHR,GPR56,JAK3,ITGB3,ITGAV,BMP4,BMP2,NLRC5,FZD7,MYC,EDN1,ECE1,ARRDC3,LITAF,C1QTNF3,HCLS1,AKAP12,FZD5,KANK1,LFNG,LGALS1,CD4,SULF1,ZNF385A,NGF,STAT3,CD74,ANKRD1"
GO: Biological Process	negative regulation of production of molecular mediator of immune response	8.15E-07	3.48E-05	6	14	"HMOX1,IRAK3,TGFB2,TGFB3,JAK3,BCL6"
GO: Biological Process	negative regulation of multicellular organismal process	8.81E-07	3.73E-05	30	421	"PPARG,FKBP1B,HMOX1,ADM,ADRA1D,ABCG5,AGER,ZC3H12A,F2RL1,F2R,IRAK3,IL6R,FRZB,PDE4B,PLAT,PLAU,TGFB2,TGFB3,THBS1,THBD,TNFAIP3,JAK3,BCL6,BMP4,SERPINE1,NLRC5,EDN1,ARRDC3,PTGS2,C1QTNF3"
GO: Biological Process	cell activation involved in immune response	9.67E-07	4.03E-05	17	158	"FCER1G,HMOX1,CPLX2,F2RL1,ANXA3,IL4R,TLR7,TYROBP,ICAM1,RELB,TNFAIP3,JAK3,BCL6,PRAM1,SWAP70,LCP1,LGALS1"
GO: Biological Process	leukocyte activation involved in immune response	9.67E-07	4.03E-05	17	158	"FCER1G,HMOX1,CPLX2,F2RL1,ANXA3,IL4R,TLR7,TYROBP,ICAM1,RELB,TNFAIP3,JAK3,BCL6,PRAM1,SWAP70,LCP1,LGALS1"
GO: Biological Process	positive regulation of behavior	1.05E-06	4.33E-05	14	109	"FIGF,SELL,AGER,F2RL1,IL6R,CCL4,CCL2,FN1,THBS1,KDR,SERPINE1,CXCL10,EDN1,CD74"
GO: Biological Process	epithelial cell proliferation	1.12E-06	4.58E-05	24	295	"CEBPB,NR4A1,HMOX1,AGER,ALDH1A2,ANG,COL8A1,CCL2,ANGPT4,PLAU,TGFB2,THBS1,KDR,TNFAIP3,ITGB3,BMP4,BMP2,B4GALT1,FZD7,MYC,EDNRB,LOXL2,FOXP1,SULF1"
GO: Biological Process	regulation of wound healing	1.38E-06	5.60E-05	13	96	"FCER1G,F2RL1,F2R,PLAT,PLAU,PLEK,THBS1,THBD,TNFAIP3,SERPINE1,MYC,EDN1,KANK1"
GO: Biological Process	cellular response to oxygen-containing compound	1.39E-06	5.60E-05	43	747	"ABCA1,PPARG,CEBPB,SOD3,FKBP1B,COL1A1,PRKAR2B,ZC3H12A,ALDH1A2,LY96,SOCS3,IGF1R,COL3A1,CCL2,PDE2A,CYP26B1,PDE4B,MGST1,IRF8,FOS,MMP3,ICAM1,GHR,TNFAIP3,HMGN3,JAK3,BMP4,SERPINE1,FZD7,EDNRB,PTGS2,LITAF,PXDN,DPEP1,IRS2,KANK1,GPX3,LGALS1,LCN2,EGR1,FBLN5,STAT3,ANKRD1"
GO: Biological Process	cell junction organization	1.50E-06	6.01E-05	20	219	"PERP,TRPV4,CLDN1,FBLIM1,FN1,PLEC,TGFB2,TGFB3,THBS1,GJB2,KDR,ITGB3,ITGAV,ITGA6,RAMP2,CLDN15,FZD5,CD9,CDH11,CDH5"
GO: Biological Process	secretion	1.92E-06	7.63E-05	50	941	"FCER1G,ABCA1,PPARG,CDO1,SLC38A2,NLRP1,TRPV4,FKBP1B,FIGF,HMOX1,ADM,PRKAR2B,CPLX2,CLU,F2RL1,F2R,MTNR1B,ANG,ANXA3,IL4R,UMPS,PECAM1,FN1,PLEK,TGFB2,TGFB3,THBS1,TIMP1,RHBDF2,HMGN3,LRRC32,PRAM1,CLEC4M,ITGB3,SERPINE1,B4GALT1,PAM,CXCL10,MYC,EDN1,EDNRB,LY6E,C1QTNF3,RAB3D,IRS2,CD9,NGF,NNAT,CD74,ANKRD1"
GO: Biological Process	collagen metabolic process	2.02E-06	7.93E-05	14	115	"AGER,COL1A1,F2R,IL6R,COL14A1,COL12A1,COL5A1,COL8A1,COL3A1,CTSK,MMP3,TGFB3,COL18A1,BMP4"
GO: Biological Process	response to abiotic stimulus	2.04E-06	7.98E-05	50	943	"PPARG,SOD3,TRPV4,HMOX1,ADM,ABCG5,COL1A1,CIRBP,ANG,PER1,TLR7,COL3A1,FAS,CCL2,PDE2A,ANGPT4,PLAT,FOS,PLAU,HSPG2,CRY2,PDLIM1,RDH10,ATP1B1,ICAM1,DDB2,DCN,TGFB2,TGFB3,THBS1,RBM3,JUNB,BMP2,SLC52A3,RAMP2,PAM,CXCL10,MYC,EDN1,ECE1,APOLD1,PTGS2,BHLHE40,BTG2,LOXL2,EPAS1,CD9,NGF,EGR1,ANKRD1"
GO: Biological Process	cellular response to cytokine stimulus	2.11E-06	8.15E-05	32	486	"PPARG,TNFRSF19,F2RL1,HLA-DQA1,HLA-B,IRAK3,IL4R,IL6R,IFNGR1,SOCS3,CORO1A,FAS,CCL2,PDE2A,IRF8,FN1,OSMR,ICAM1,IFI30,GHR,JAK3,NLRC5,IL15RA,GBP1,EDN1,PXDN,HCLS1,LCN2,EGR1,STAT3,CD74,ANKRD1"
GO: Biological Process	positive regulation of apoptotic process	2.18E-06	8.39E-05	29	417	"NR4A1,ADM,AGER,IER3,CLU,ALDH1A2,BCL2L11,FRZB,IGFBP3,FAS,MNDA,TGM2,TGFB2,TGFB3,THBS1,COL18A1,JAK3,BCL6,NR4A3,BMP4,BMP2,ITGA6,B4GALT1,MYC,PTGS2,ZBTB16,NGF,EGR1,ANKRD1"
GO: Biological Process	regulation of interleukin-6 production	2.55E-06	9.72E-05	12	86	"FCER1G,CEBPB,FIGF,ZC3H12A,F2RL1,F2R,HLA-B,IRAK3,IL6R,TLR7,TNFAIP3,C1QTNF3"
GO: Biological Process	regulation of cytokine production involved in immune response	2.63E-06	9.94E-05	9	46	"FCER1G,HMOX1,F2RL1,IRAK3,TGFB2,TGFB3,JAK3,BCL6,CD74"
GO: Biological Process	regulation of phosphorylation	2.65E-06	9.94E-05	52	1006	"FGF13,CDKN2C,GDF6,ADARB1,AGER,PRKAR2B,PIK3IP1,FABP4,FAM129A,F2R,ANG,IRAK3,IL6R,UCHL1,SOCS3,IGF1R,IGFBP3,PECAM1,CCL2,ANGPT4,PPP1R14A,ATF3,PIM1,KDELR3,ICAM1,TGFB2,TGFB3,THBS1,KDR,GHR,TNFAIP3,ITGB3,BMP4,BMP2,ITGA6,CCNYL1,NLRC5,FZD7,SH3BP5,MYC,EDN1,EDNRB,ERRFI1,HCLS1,TARBP2,FZD5,IRS2,EPHA1,CD4,SPN,NGF,CD74"
GO: Biological Process	regulation of phosphate metabolic process	2.73E-06	1.02E-04	68	1459	"ABCA1,DOCK4,FGF13,CDKN2C,GDF6,ADARB1,FKBP1B,ADM,AGER,PRKAR2B,ELMOD1,PIK3IP1,FABP4,FAM129A,F2R,ANG,IRAK3,IL6R,UCHL1,SOCS3,IGF1R,IGFBP3,PECAM1,FZD2,CCL2,PDE2A,ANGPT4,PPP1R14A,PLEK,ATF3,PIM1,CRY2,KDELR3,ICAM1,TGFB2,TGFB3,THBS1,KDR,GHR,TNFAIP3,TNNT2,GNAL,BCL6,ITGB3,BMP4,BMP2,ITGA6,CCNYL1,RAMP2,NLRC5,FZD7,DYNLT1,SH3BP5,MYC,EDN1,EDNRB,ECE1,ERRFI1,HCLS1,AKAP12,TARBP2,FZD5,IRS2,EPHA1,CD4,SPN,NGF,CD74"
GO: Biological Process	positive regulation of programmed cell death	3.03E-06	1.12E-04	29	424	"NR4A1,ADM,AGER,IER3,CLU,ALDH1A2,BCL2L11,FRZB,IGFBP3,FAS,MNDA,TGM2,TGFB2,TGFB3,THBS1,COL18A1,JAK3,BCL6,NR4A3,BMP4,BMP2,ITGA6,B4GALT1,MYC,PTGS2,ZBTB16,NGF,EGR1,ANKRD1"
GO: Biological Process	cellular response to molecule of bacterial origin	3.04E-06	1.12E-04	14	119	"ABCA1,ZC3H12A,LY96,CCL2,PDE4B,IRF8,ICAM1,TNFAIP3,SERPINE1,EDNRB,LITAF,FZD5,LCN2,ANKRD1"
GO: Biological Process	negative regulation of cell activation	3.08E-06	1.12E-04	15	136	"HMOX1,ZC3H12A,HLA-DQA1,IL4R,FAS,MNDA,THBD,TNFAIP3,JAK3,BCL6,LRRC32,BMP4,SPN,LAG3,CD74"
GO: Biological Process	interleukin-6 production	3.27E-06	1.17E-04	12	88	"FCER1G,CEBPB,FIGF,ZC3H12A,F2RL1,F2R,HLA-B,IRAK3,IL6R,TLR7,TNFAIP3,C1QTNF3"
GO: Biological Process	positive regulation of inflammatory response	3.27E-06	1.17E-04	12	88	"FCER1G,AGER,FABP4,ALOX5AP,TLR7,PDE2A,OSMR,CTSS,TGM2,LRRC32,SERPINE1,PTGS2"
GO: Biological Process	negative regulation of protein metabolic process	3.39E-06	1.21E-04	35	570	"CDKN2C,ADARB1,AGER,PRKAR2B,CIRBP,FABP4,FAM129A,ANG,IRAK3,UCHL1,SOCS3,IGF1R,IGFBP3,PECAM1,PLAT,THBS1,TIMP1,TIMP3,TNFAIP3,JAK3,ITGB3,ITGAV,BMP4,SERPINE1,KLF15,SH3BP5,EDN1,EDNRB,ACER2,ERRFI1,BTG2,IGF2BP1,TARBP2,EPHA1,LAG3"
GO: Biological Process	positive regulation of cell death	3.43E-06	1.22E-04	30	450	"NR4A1,ADM,AGER,IER3,CLU,ALDH1A2,BCL2L11,FRZB,IGFBP3,FAS,MNDA,TGM2,TGFB2,TGFB3,THBS1,COL18A1,JAK3,BCL6,NR4A3,BMP4,BMP2,ITGA6,B4GALT1,MYC,ACER2,PTGS2,ZBTB16,NGF,EGR1,ANKRD1"
GO: Biological Process	collagen biosynthetic process	3.47E-06	1.22E-04	8	36	"AGER,COL1A1,F2R,IL6R,COL5A1,COL3A1,TGFB3,BMP4"
GO: Biological Process	regulation of endothelial cell apoptotic process	3.60E-06	1.26E-04	7	26	"AGER,THBS1,KDR,COL18A1,TNFAIP3,SERPINE1,RAMP2"
GO: Biological Process	regulation of behavior	3.69E-06	1.27E-04	17	174	"FIGF,SELL,SEMA3F,AGER,F2RL1,IL6R,CCL4,CCL2,FN1,THBS1,KDR,SERPINE1,CXCL10,EDN1,ARRDC3,NBL1,CD74"
GO: Biological Process	regulation of phosphorus metabolic process	3.70E-06	1.27E-04	68	1472	"ABCA1,DOCK4,FGF13,CDKN2C,GDF6,ADARB1,FKBP1B,ADM,AGER,PRKAR2B,ELMOD1,PIK3IP1,FABP4,FAM129A,F2R,ANG,IRAK3,IL6R,UCHL1,SOCS3,IGF1R,IGFBP3,PECAM1,FZD2,CCL2,PDE2A,ANGPT4,PPP1R14A,PLEK,ATF3,PIM1,CRY2,KDELR3,ICAM1,TGFB2,TGFB3,THBS1,KDR,GHR,TNFAIP3,TNNT2,GNAL,BCL6,ITGB3,BMP4,BMP2,ITGA6,CCNYL1,RAMP2,NLRC5,FZD7,DYNLT1,SH3BP5,MYC,EDN1,EDNRB,ECE1,ERRFI1,HCLS1,AKAP12,TARBP2,FZD5,IRS2,EPHA1,CD4,SPN,NGF,CD74"
GO: Biological Process	multicellular organismal macromolecule metabolic process	3.72E-06	1.27E-04	14	121	"AGER,COL1A1,F2R,IL6R,COL14A1,COL12A1,COL5A1,COL8A1,COL3A1,CTSK,MMP3,TGFB3,COL18A1,BMP4"
GO: Biological Process	response to organonitrogen compound	3.80E-06	1.29E-04	40	699	"PPARG,CHRNB1,CDO1,CEBPB,NLRP1,HMOX1,ADM,SELL,COL1A1,PRKAR2B,GPIHBP1,IRAK3,SOCS3,IGF1R,COL3A1,CCL2,PDE2A,PDE4B,MGST1,PLAT,FOS,MMP3,ICAM1,TIMP1,GHR,TNFAIP3,GNAL,JAK3,JUNB,NR4A3,DIAPH1,MYC,EDN1,PTGS2,BTG2,IRS2,KANK1,NGF,EGR1,STAT3"
GO: Biological Process	rhythmic process	3.91E-06	1.31E-04	20	233	"SGPL1,PER2,PER3,MTNR1B,ANG,PER1,CRY2,ICAM1,TGFB2,TGFB3,DBP,KDR,BMP4,PAM,TEF,CMPK1,NAGLU,BHLHE40,LFNG,EGR1"
GO: Biological Process	regulation of anatomical structure size	3.91E-06	1.31E-04	26	361	"ACTA2,FGF13,HMOX1,ADM,ADRA1D,SEMA3F,F2RL1,F2R,WAS,PECAM1,CORO1A,TNFRSF12A,PLEK,INF2,ICAM1,SSH3,CAPG,EDN1,EDNRB,ECE1,PTGS2,HCLS1,KANK1,ELN,SPP1,NGF"
GO: Biological Process	secretion by cell	3.97E-06	1.32E-04	45	831	"FCER1G,ABCA1,PPARG,SLC38A2,NLRP1,TRPV4,FKBP1B,FIGF,HMOX1,ADM,PRKAR2B,CPLX2,CLU,F2RL1,F2R,MTNR1B,ANG,ANXA3,IL4R,PECAM1,FN1,PLEK,TGFB2,TGFB3,THBS1,TIMP1,RHBDF2,HMGN3,LRRC32,PRAM1,CLEC4M,ITGB3,SERPINE1,B4GALT1,PAM,CXCL10,EDN1,LY6E,C1QTNF3,RAB3D,IRS2,CD9,NGF,NNAT,ANKRD1"
GO: Biological Process	negative regulation of immune effector process	4.06E-06	1.34E-04	11	75	"HMOX1,HLA-B,IRAK3,IL4R,TGFB2,TGFB3,TNFAIP3,JAK3,BCL6,TARBP2,SPN"
GO: Biological Process	regulation of lipid storage	4.32E-06	1.41E-04	8	37	"ABCA1,PPARG,ZC3H12A,MEST,ITGB3,ITGAV,HILPDA,ABCG1"
GO: Biological Process	negative regulation of cell-substrate adhesion	4.32E-06	1.41E-04	8	37	"COL1A1,THBS1,BCL6,SERPINE1,FZD7,ACER2,KANK1,LGALS1"
GO: Biological Process	regulation of cell-substrate adhesion	4.51E-06	1.46E-04	14	123	"COL1A1,COL8A1,PLAU,THBS1,KDR,BCL6,SERPINE1,ITGA6,FZD7,ACER2,EPHA1,KANK1,LGALS1,SPP1"
GO: Biological Process	regulation of immune effector process	4.63E-06	1.48E-04	22	277	"FCER1G,HMOX1,F2RL1,HLA-B,MBL2,CFP,IRAK3,IL4R,CCL2,ICAM1,TGFB2,TGFB3,TNFAIP3,JAK3,BCL6,PRAM1,TARBP2,FOXP1,CD4,SPN,LAG3,CD74"
GO: Biological Process	regulation of cell activation	4.63E-06	1.48E-04	28	410	"FCER1G,HMOX1,ZC3H12A,F2RL1,HLA-DQA1,HLA-DMA,IL4R,CORO1A,MAP3K8,FAS,CCL2,PLEK,MNDA,THBS1,THBD,TNFAIP3,JAK3,BCL6,LRRC32,PRAM1,BMP4,IL15RA,IRS2,LGALS1,CD4,SPN,LAG3,CD74"
GO: Biological Process	regulation of transport	4.71E-06	1.50E-04	64	1366	"FCER1G,ABCA1,PPARG,NLRP1,FKBP1B,HMOX1,SELE,ABCG5,AGER,PRKAR2B,IER3,F2RL1,F2R,MTNR1B,ANG,MBL2,BCL2L11,IL4R,TLR7,CCL4,CCL2,PDE2A,PDE4B,CRY2,ICAM1,TGFB2,TGFB3,THBS1,RHBDF2,YRDC,HMGN3,TNNT2,CYBB,JAK3,LRRC32,PRAM1,CLEC4M,ITGB3,ITGAV,DIAPH1,BMP4,SERPINE1,B4GALT1,FZD7,PAM,GSTO1,MYC,EDN1,EDNRB,SLC25A27,PTGS2,CACNB3,LITAF,C1QTNF3,RAB3D,HCLS1,ABCG1,IRS2,LCP1,KANK1,NGF,NNAT,CD74,ANKRD1"
GO: Biological Process	response to hormone	4.94E-06	1.56E-04	43	785	"PPARG,CDO1,NR4A1,HMOX1,ADM,COL1A1,PRKAR2B,ALDH1A2,ANG,IL4R,SOCS3,IGF1R,FAS,CCL2,CTSS,PLAT,FOS,CTSH,ICAM1,TGFB2,TGFB3,THBS1,TIMP1,GHR,RERG,JAK3,JUNB,NR4A3,BMP4,RAMP2,PAM,EDN1,PTGS2,LOX,BTG2,HCLS1,ABCG1,IRS2,KANK1,SPP1,NGF,EGR1,STAT3"
GO: Biological Process	multicellular organismal homeostasis	5.45E-06	1.71E-04	19	218	"GPR116,F2R,LDB2,COL14A1,CORO1A,CTSS,CTSK,CTSH,KDR,TNFAIP3,ITGB3,ITGAV,EDNRB,ARRDC3,PTGS2,EPAS1,RAC2,SPP1,STAT3"
GO: Biological Process	skeletal system development	5.97E-06	1.85E-04	29	439	"FBN2,HOXB6,HOXB9,HOXD10,COL1A1,SGPL1,FRZB,COL12A1,COL3A1,CYP26B1,HSPG2,RDH10,TGFB2,TGFB3,KLF10,FAT4,THBS1,GHR,BMP4,BMP2,MYC,EDN1,ADAMTS4,LOXL2,RUNX2,LGALS3,SULF1,ZBTB16,CDH11"
GO: Biological Process	transmembrane receptor protein serine/threonine kinase signaling pathway	5.99E-06	1.85E-04	23	303	"FBN2,GDF6,PPP1R15A,COL3A1,CCL2,FOS,TGIF1,TGFB2,TGFB3,KLF10,THBS1,KDR,PMEPA1,JUNB,BMP4,SERPINE1,BMP2,FSTL3,MYC,NBL1,RUNX2,SULF1,EGR1"
GO: Biological Process	regulation of production of molecular mediator of immune response	6.01E-06	1.85E-04	11	78	"FCER1G,HMOX1,F2RL1,IRAK3,TGFB2,TGFB3,TNFAIP3,JAK3,BCL6,FOXP1,CD74"
GO: Biological Process	response to progesterone	6.19E-06	1.89E-04	7	28	"CCL2,FOS,TGFB2,TGFB3,THBS1,JUNB,RAMP2"
GO: Biological Process	negative regulation of leukocyte activation	6.58E-06	1.99E-04	14	127	"HMOX1,ZC3H12A,HLA-DQA1,IL4R,FAS,MNDA,TNFAIP3,JAK3,BCL6,LRRC32,BMP4,SPN,LAG3,CD74"
GO: Biological Process	regulation of smooth muscle cell proliferation	6.59E-06	1.99E-04	12	94	"PPARG,HMOX1,AGER,ANG,IL6R,IGFBP3,TGM2,TNFAIP3,OGN,BMP4,EDN1,PTGS2"
GO: Biological Process	leukocyte apoptotic process	7.36E-06	2.21E-04	12	95	"FCER1G,BCL2L11,FAS,TGFB2,JAK3,BCL6,NR4A3,BMP4,MYC,HCLS1,IRS2,CD74"
GO: Biological Process	endothelial cell apoptotic process	7.97E-06	2.38E-04	7	29	"AGER,THBS1,KDR,COL18A1,TNFAIP3,SERPINE1,RAMP2"
GO: Biological Process	neurogenesis	8.08E-06	2.39E-04	63	1360	"PPARG,FGF13,CDKN2C,CEBPB,GDF6,TRPV4,HOXD10,PMP22,ADM,SEMA3F,AGER,ALDH1A2,MAN2A1,S100A6,FRZB,UCHL1,COL5A1,IGF1R,COL3A1,FZD2,FAS,CCL2,TYROBP,TNFRSF12A,FN1,ADAM22,TGIF1,TGFB2,FAT4,RTN4RL2,GPR56,SPON2,SSH3,NR4A3,ITGB3,ITGAV,DIAPH1,BMP4,BMP2,KLF15,FZD7,DYNLT1,IL15RA,EDNRB,CACNB3,NAGLU,NBL1,BTG2,FZD5,FOXP1,KANK1,CD9,LGALS1,LAMA2,PDLIM5,RAC2,SPP1,CDH11,NGF,NNAT,EGR1,STAT3,ANKRD1"
GO: Biological Process	positive regulation of phosphate metabolic process	8.14E-06	2.39E-04	41	748	"ABCA1,FGF13,GDF6,ADM,AGER,PRKAR2B,FAM129A,F2R,ANG,IL6R,PECAM1,FZD2,CCL2,ANGPT4,ATF3,PIM1,KDELR3,ICAM1,TGFB2,TGFB3,THBS1,KDR,GHR,GNAL,ITGB3,BMP4,BMP2,ITGA6,RAMP2,FZD7,MYC,EDN1,EDNRB,ECE1,HCLS1,AKAP12,FZD5,CD4,SPN,NGF,CD74"
GO: Biological Process	positive regulation of phosphorus metabolic process	8.14E-06	2.39E-04	41	748	"ABCA1,FGF13,GDF6,ADM,AGER,PRKAR2B,FAM129A,F2R,ANG,IL6R,PECAM1,FZD2,CCL2,ANGPT4,ATF3,PIM1,KDELR3,ICAM1,TGFB2,TGFB3,THBS1,KDR,GHR,GNAL,ITGB3,BMP4,BMP2,ITGA6,RAMP2,FZD7,MYC,EDN1,EDNRB,ECE1,HCLS1,AKAP12,FZD5,CD4,SPN,NGF,CD74"
GO: Biological Process	cytokine-mediated signaling pathway	8.52E-06	2.48E-04	26	377	"PPARG,TNFRSF19,F2RL1,HLA-DQA1,HLA-B,IRAK3,IL4R,IL6R,IFNGR1,SOCS3,FAS,CCL2,IRF8,OSMR,ICAM1,IFI30,GHR,JAK3,NLRC5,IL15RA,GBP1,EDN1,PXDN,EGR1,STAT3,CD74"
GO: Biological Process	positive regulation of defense response	8.62E-06	2.50E-04	22	288	"FCER1G,AGER,FABP4,F2RL1,ALOX5AP,LY96,IRAK3,TLR7,PDE2A,OSMR,CTSS,FOS,CTSK,TGM2,TNFAIP3,LRRC32,SERPINE1,POLR3D,PTGS2,RFTN1,LAG3,CD74"
GO: Biological Process	cellular response to lipopolysaccharide	8.77E-06	2.51E-04	13	113	"ABCA1,ZC3H12A,LY96,CCL2,PDE4B,IRF8,ICAM1,TNFAIP3,SERPINE1,EDNRB,LITAF,LCN2,ANKRD1"
GO: Biological Process	odontogenesis	8.77E-06	2.51E-04	13	113	"PERP,ADM,COL1A1,BCL2L11,FAM20A,TGFB2,TGFB3,BMP4,BMP2,ITGA6,PAM,EDN1,RUNX2"
GO: Biological Process	smooth muscle cell proliferation	9.16E-06	2.61E-04	12	97	"PPARG,HMOX1,AGER,ANG,IL6R,IGFBP3,TGM2,TNFAIP3,OGN,BMP4,EDN1,PTGS2"
GO: Biological Process	response to mechanical stimulus	9.83E-06	2.77E-04	16	168	"TRPV4,COL1A1,TLR7,FAS,CCL2,PDE2A,FOS,DCN,JUNB,CXCL10,MYC,PTGS2,BTG2,NGF,EGR1,ANKRD1"
GO: Biological Process	regulation of endothelial cell proliferation	9.84E-06	2.77E-04	11	82	"NR4A1,AGER,ALDH1A2,ANG,CCL2,THBS1,KDR,ITGB3,BMP4,BMP2,SULF1"
GO: Biological Process	negative regulation of transferase activity	9.91E-06	2.77E-04	18	207	"PPARG,CDKN2C,ADARB1,PRKAR2B,PIK3IP1,FABP4,IRAK3,UCHL1,SOCS3,IGF1R,TNFAIP3,BMP4,SH3BP5,ERRFI1,TARBP2,IRS2,EPHA1,CHCHD10"
GO: Biological Process	regulation of leukocyte activation	1.03E-05	2.86E-04	26	381	"FCER1G,HMOX1,ZC3H12A,F2RL1,HLA-DQA1,HLA-DMA,IL4R,CORO1A,MAP3K8,FAS,CCL2,MNDA,THBS1,TNFAIP3,JAK3,BCL6,LRRC32,PRAM1,BMP4,IL15RA,IRS2,LGALS1,CD4,SPN,LAG3,CD74"
GO: Biological Process	tissue remodeling	1.03E-05	2.86E-04	15	150	"F2R,FRZB,CTSS,CTSK,TGM2,TGFB2,TGFB3,TNFAIP3,ITGB3,ITGAV,B4GALT1,EPAS1,ELN,RAC2,SPP1"
GO: Biological Process	negative regulation of response to stimulus	1.04E-05	2.87E-04	51	1028	"FBN2,PPARG,HMOX1,ADM,SEMA3F,IER3,PIK3IP1,CLU,F2RL1,HLA-B,IRAK3,PPP1R15A,FRZB,UCHL1,SOCS3,IGF1R,COL3A1,IGFBP3,CCL2,CYP26B1,PLEK,KCTD13,TGIF1,TGFB2,TGFB3,THBS1,PMEPA1,TNFAIP3,BCL6,ITGAV,BMP4,SERPINE1,BMP2,ITGA6,NLRC5,FSTL3,MYC,ERRFI1,C1QTNF3,PXDN,NBL1,RUNX2,TARBP2,KANK1,PTCH2,SPN,SULF1,SPP1,ZNF385A,EGR1,CD74"
GO: Biological Process	cellular response to lipid	1.07E-05	2.94E-04	22	292	"ABCA1,PPARG,NR4A1,COL1A1,ZC3H12A,ALDH1A2,LY96,CCL2,CYP26B1,PDE4B,IRF8,ICAM1,TNFAIP3,NR4A3,BMP4,SERPINE1,FZD7,EDNRB,LITAF,LCN2,EGR1,ANKRD1"
GO: Biological Process	chemical homeostasis	1.11E-05	3.02E-04	44	838	"ABCA1,PPARG,GPR116,CD52,TRPV4,FKBP1B,HMOX1,ADM,ABCG5,MT1H,AGER,FABP4,F2RL1,F2R,MTNR1B,GPIHBP1,CP,FZD2,CCL2,CTSH,ICAM1,TGM2,CLN6,TGFB2,SFXN3,KDR,HMGN3,JAK3,ITGAV,DIAPH1,DYNLT1,GSTO1,MYC,EDN1,EDNRB,SLC25A27,C1QTNF3,EPAS1,ABCG1,IRS2,LGALS1,LCN2,CXCL1,STAT3"
GO: Biological Process	cellular response to biotic stimulus	1.13E-05	3.05E-04	14	133	"ABCA1,ZC3H12A,LY96,CCL2,PDE4B,IRF8,ICAM1,TNFAIP3,SERPINE1,EDNRB,LITAF,FZD5,LCN2,ANKRD1"
GO: Biological Process	lymphocyte differentiation	1.17E-05	3.15E-04	21	272	"HLA-DQA1,HLA-DMA,IL4R,FAS,WWP1,RELB,TNFAIP3,JAK3,BCL6,BMP4,FZD7,IL15RA,RUNX2,FZD5,FOXP1,TNFSF8,LGALS1,CD4,SPN,EGR1,CD74"
GO: Biological Process	collagen fibril organization	1.18E-05	3.15E-04	8	42	"COL1A1,COL14A1,COL12A1,COL5A1,COL3A1,TGFB2,LOX,LOXL2"
GO: Biological Process	acute inflammatory response	1.23E-05	3.26E-04	14	134	"FCER1G,PPARG,CEBPB,ALOX5AP,MBL2,CFP,IL6R,FN1,OSMR,B4GALT1,EDNRB,PTGS2,SPN,STAT3"
GO: Biological Process	cytokine production involved in immune response	1.23E-05	3.26E-04	9	55	"FCER1G,HMOX1,F2RL1,IRAK3,TGFB2,TGFB3,JAK3,BCL6,CD74"
GO: Biological Process	regulation of hemostasis	1.24E-05	3.26E-04	10	69	"FCER1G,F2RL1,F2R,PLAT,PLAU,PLEK,THBS1,THBD,SERPINE1,EDN1"
GO: Biological Process	regulation of blood coagulation	1.24E-05	3.26E-04	10	69	"FCER1G,F2RL1,F2R,PLAT,PLAU,PLEK,THBS1,THBD,SERPINE1,EDN1"
GO: Biological Process	negative regulation of macrophage derived foam cell differentiation	1.35E-05	3.51E-04	5	13	"ABCA1,PPARG,ITGB3,ITGAV,ABCG1"
GO: Biological Process	T cell differentiation	1.38E-05	3.57E-04	17	192	"HLA-DQA1,HLA-DMA,IL4R,FAS,WWP1,RELB,JAK3,BCL6,BMP4,FZD7,RUNX2,FZD5,TNFSF8,CD4,SPN,EGR1,CD74"
GO: Biological Process	leukocyte mediated immunity	1.38E-05	3.57E-04	21	275	"FCER1G,HMOX1,CPLX2,CLU,F2RL1,HLA-B,HLA-DMA,MBL2,ANXA3,IL6R,FAS,CTSH,ICAM1,JAK3,BCL6,PRAM1,C1R,SWAP70,SPN,LAG3,CD74"
GO: Biological Process	positive regulation of epithelial cell migration	1.42E-05	3.64E-04	10	70	"ANXA3,ANGPT4,CTSH,TGFB2,THBS1,KDR,ITGB3,BMP4,EDN1,PTGS2"
GO: Biological Process	lipid storage	1.43E-05	3.66E-04	9	56	"ABCA1,PPARG,ZC3H12A,MEST,GM2A,ITGB3,ITGAV,HILPDA,ABCG1"
GO: Biological Process	skeletal muscle tissue development	1.53E-05	3.89E-04	16	174	"HOXD10,NR4A1,IGFBP3,CYP26B1,MAFF,FOS,ATF3,MBNL3,DCN,BMP4,MYC,BTG2,FOXP1,ELN,EGR1,ANKRD1"
GO: Biological Process	regulation of cell development	1.54E-05	3.89E-04	36	637	"PPARG,FGF13,GDF6,TRPV4,PMP22,SEMA3F,AGER,COL1A1,COL14A1,MAN2A1,FRZB,COL3A1,IGFBP3,TYROBP,TNFRSF12A,MBNL3,TGIF1,TGFB2,TGFB3,GPR56,SSH3,BMP4,BMP2,B4GALT1,DYNLT1,IL15RA,EDN1,EDNRB,NBL1,KANK1,LGALS1,PDLIM5,SPP1,NGF,STAT3,ANKRD1"
GO: Biological Process	response to interleukin-1	1.61E-05	4.05E-04	10	71	"SELE,IRAK3,CCL2,FN1,ICAM1,GHR,EDN1,LCN2,EGR1,ANKRD1"
GO: Biological Process	homeostasis of number of cells	1.66E-05	4.14E-04	18	215	"FCER1G,HOXB6,HMOX1,F2R,BCL2L11,COL14A1,CORO1A,FAS,PDE4B,TGFB2,TIMP1,TNFAIP3,JAK3,BCL6,BMP4,HCLS1,EPAS1,CD74"
GO: Biological Process	cellular response to transforming growth factor beta stimulus	1.66E-05	4.14E-04	18	215	"FBN2,COL1A1,PPP1R15A,COL3A1,CCL2,PDE2A,FOS,TGIF1,TGFB2,TGFB3,KLF10,THBS1,PMEPA1,JUNB,SERPINE1,BMP2,MYC,ANKRD1"
GO: Biological Process	positive regulation of biosynthetic process	1.71E-05	4.24E-04	66	1482	"ABCA1,PPARG,HOXB9,CEBPB,GDF6,HOXD10,NR4A1,HMOX1,ADM,COL1A1,CIRBP,F2RL1,FAM129A,F2R,LDB2,TLR7,IGF1R,FZD2,CCL2,IRF8,FOS,KCTD13,ICAM1,TGFB2,TGFB3,THBS1,DBP,KDR,HMGN3,GNAL,RBM3,JAK3,JUNB,NR4A3,BMP4,SERPINE1,BMP2,KLF15,ITGA6,RAMP2,NLRC5,FZD7,TEF,FSTL3,MYC,EDN1,ECE1,PTGS2,BTG2,HCLS1,AKAP12,RUNX2,FZD5,EPAS1,ABCG1,FOXP1,IRS2,TNFSF8,CREB3L1,ELF4,CD4,SPN,ZBTB16,EGR1,STAT3,ANKRD1"
GO: Biological Process	response to transforming growth factor beta	1.77E-05	4.37E-04	18	216	"FBN2,COL1A1,PPP1R15A,COL3A1,CCL2,PDE2A,FOS,TGIF1,TGFB2,TGFB3,KLF10,THBS1,PMEPA1,JUNB,SERPINE1,BMP2,MYC,ANKRD1"
GO: Biological Process	regulation of transferase activity	1.81E-05	4.43E-04	40	747	"PPARG,FGF13,CDKN2C,ADARB1,PRKAR2B,PIK3IP1,FABP4,F2R,ANG,IRAK3,IL6R,UCHL1,SOCS3,IGF1R,CCL2,ANGPT4,ATF3,PIM1,KDELR3,TGFB2,TGFB3,THBS1,GHR,TNFAIP3,ITGB3,BMP4,BMP2,CCNYL1,NLRC5,SH3BP5,EDN1,ERRFI1,TARBP2,FZD5,IRS2,EPHA1,CD4,CHCHD10,NGF,CD74"
GO: Biological Process	defense response to other organism	1.88E-05	4.58E-04	25	371	"FCER1G,NLRP1,ADARB1,F2RL1,HLA-B,MBL2,CFP,ANXA3,IL4R,STAB2,IL6R,TLR7,IRF8,CXCL9,TNFAIP3,CLEC4M,SERPINE1,POLR3D,NLRC5,CXCL10,GBP1,TARBP2,TNFSF8,CD4,SPN"
GO: Biological Process	intracellular protein kinase cascade	1.95E-05	4.75E-04	49	996	"FGF13,HMOX1,AGER,TNFRSF19,NEK6,F2RL1,F2R,LY96,IRAK3,IL6R,UCHL1,SOCS3,TLR7,IGF1R,IGFBP3,PECAM1,CCL2,FOS,PLEK,CTSH,TGM2,TGFB2,TGFB3,THBS1,KDR,GHR,GPR56,TNFAIP3,JAK3,ITGAV,BMP4,BMP2,FZD7,IL15RA,MYC,EDN1,ECE1,PTGS2,ERRFI1,LITAF,C1QTNF3,HCLS1,AKAP12,FZD5,IRS2,LGALS1,NGF,STAT3,CD74"
GO: Biological Process	muscle cell proliferation	2.03E-05	4.90E-04	14	140	"PPARG,HMOX1,AGER,ANG,IL6R,IGFBP3,TGM2,TGFB2,TNFAIP3,OGN,BMP4,EDN1,PTGS2,FOXP1"
GO: Biological Process	negative regulation of cell death	2.05E-05	4.94E-04	42	805	"FCER1G,CEBPB,HMOX1,IER3,F2R,ABCB1,SOCS3,IGF1R,FAS,CCL2,FN1,ANGPT4,CTSH,PIM1,TGFB2,TGFB3,THBS1,TIMP1,KDR,GHR,TNFAIP3,JAK3,TMEM132A,BCL6,NR4A3,ITGAV,BMP4,SERPINE1,RAMP2,MYC,EDN1,EDNRB,SLC25A27,BTG2,HCLS1,DPEP1,IRS2,SPP1,NGF,EGR1,STAT3,CD74"
GO: Biological Process	regulation of coagulation	2.07E-05	4.95E-04	10	73	"FCER1G,F2RL1,F2R,PLAT,PLAU,PLEK,THBS1,THBD,SERPINE1,EDN1"
GO: Biological Process	regulation of cellular component size	2.13E-05	5.08E-04	18	219	"FGF13,SEMA3F,F2RL1,WAS,PECAM1,CORO1A,TNFRSF12A,PLEK,INF2,ICAM1,SSH3,CAPG,EDN1,HCLS1,KANK1,ELN,SPP1,NGF"
GO: Biological Process	regulation of vasculature development	2.19E-05	5.20E-04	17	199	"HMOX1,ADM,ANXA3,CCL2,ANGPT4,CTSH,THBS1,KDR,TNFAIP3,BMP4,SERPINE1,RAMP2,CXCL10,PTGS2,EPHA1,SULF1,EGR1"
GO: Biological Process	striated muscle tissue development	2.27E-05	5.35E-04	23	329	"HOXD10,NR4A1,ALDH1A2,COL14A1,IGFBP3,CYP26B1,MAFF,FOS,HSPG2,ATF3,MBNL3,DCN,TGFB2,TNNT2,BMP4,BMP2,MYC,LY6E,BTG2,FOXP1,ELN,EGR1,ANKRD1"
GO: Biological Process	epithelial cell migration	2.41E-05	5.58E-04	15	161	"NR4A1,AGER,ANXA3,ANGPT4,CTSH,TGFB2,THBS1,KDR,CYP1B1,ITGB3,ITGAV,BMP4,EDN1,PTGS2,LOXL2"
GO: Biological Process	epithelium migration	2.41E-05	5.58E-04	15	161	"NR4A1,AGER,ANXA3,ANGPT4,CTSH,TGFB2,THBS1,KDR,CYP1B1,ITGB3,ITGAV,BMP4,EDN1,PTGS2,LOXL2"
GO: Biological Process	tissue homeostasis	2.41E-05	5.58E-04	15	161	"GPR116,F2R,LDB2,COL14A1,CORO1A,CTSS,CTSK,CTSH,KDR,TNFAIP3,ITGB3,ITGAV,EPAS1,RAC2,SPP1"
GO: Biological Process	endothelial cell migration	2.41E-05	5.58E-04	13	124	"NR4A1,AGER,ANXA3,ANGPT4,THBS1,KDR,CYP1B1,ITGB3,ITGAV,BMP4,EDN1,PTGS2,LOXL2"
GO: Biological Process	skeletal muscle organ development	2.50E-05	5.77E-04	16	181	"HOXD10,NR4A1,IGFBP3,CYP26B1,MAFF,FOS,ATF3,MBNL3,DCN,BMP4,MYC,BTG2,FOXP1,ELN,EGR1,ANKRD1"
GO: Biological Process	interferon-gamma-mediated signaling pathway	2.63E-05	6.03E-04	10	75	"PPARG,HLA-DQA1,HLA-B,IFNGR1,SOCS3,IRF8,ICAM1,IFI30,NLRC5,GBP1"
GO: Biological Process	cellular response to metal ion	2.69E-05	6.14E-04	11	91	"PPARG,HMOX1,MT1H,FABP4,ALOX5AP,FAS,FN1,FOS,JUNB,FSTL3,DPEP1"
GO: Biological Process	negative regulation of lymphocyte activation	2.76E-05	6.27E-04	12	108	"HLA-DQA1,IL4R,FAS,MNDA,TNFAIP3,JAK3,BCL6,LRRC32,BMP4,SPN,LAG3,CD74"
GO: Biological Process	cellular response to drug	2.80E-05	6.33E-04	8	47	"UMPS,PDE2A,PDE4B,MYC,ACER2,DPEP1,EGR1,ANKRD1"
GO: Biological Process	regulation of epithelial cell proliferation	2.86E-05	6.43E-04	19	245	"NR4A1,AGER,ALDH1A2,ANG,CCL2,PLAU,TGFB2,THBS1,KDR,TNFAIP3,ITGB3,BMP4,BMP2,B4GALT1,FZD7,MYC,EDNRB,FOXP1,SULF1"
GO: Biological Process	positive regulation of fat cell differentiation	3.00E-05	6.72E-04	7	35	"PPARG,ZC3H12A,FRZB,BMP2,PTGS2,ZNF385A,ZBTB16"
GO: Biological Process	ameboidal cell migration	3.02E-05	6.74E-04	19	246	"NR4A1,SEMA3F,AGER,SGPL1,ANXA3,ANGPT4,CTSH,TGFB2,THBS1,TIMP1,KDR,CYP1B1,ITGB3,ITGAV,BMP4,EDN1,EDNRB,PTGS2,LOXL2"
GO: Biological Process	production of molecular mediator of immune response	3.11E-05	6.91E-04	13	127	"FCER1G,HMOX1,F2RL1,IRAK3,FAS,TGFB2,TGFB3,TNFAIP3,JAK3,BCL6,SWAP70,FOXP1,CD74"
GO: Biological Process	cellular response to interleukin-1	3.28E-05	7.25E-04	8	48	"IRAK3,CCL2,FN1,ICAM1,EDN1,LCN2,EGR1,ANKRD1"
GO: Biological Process	regulation of leukocyte apoptotic process	3.32E-05	7.31E-04	10	77	"FCER1G,TGFB2,JAK3,BCL6,NR4A3,BMP4,MYC,HCLS1,IRS2,CD74"
GO: Biological Process	skeletal muscle cell differentiation	3.34E-05	7.32E-04	9	62	"NR4A1,CYP26B1,MAFF,FOS,ATF3,MYC,BTG2,EGR1,ANKRD1"
GO: Biological Process	tissue migration	3.45E-05	7.54E-04	15	166	"NR4A1,AGER,ANXA3,ANGPT4,CTSH,TGFB2,THBS1,KDR,CYP1B1,ITGB3,ITGAV,BMP4,EDN1,PTGS2,LOXL2"
GO: Biological Process	negative regulation of phosphorus metabolic process	3.80E-05	8.22E-04	22	317	"CDKN2C,ADARB1,AGER,PRKAR2B,FABP4,FAM129A,IRAK3,UCHL1,SOCS3,IGF1R,IGFBP3,PECAM1,PDE2A,PLEK,TNFAIP3,BMP4,SH3BP5,EDN1,EDNRB,ERRFI1,TARBP2,EPHA1"
GO: Biological Process	negative regulation of phosphate metabolic process	3.80E-05	8.22E-04	22	317	"CDKN2C,ADARB1,AGER,PRKAR2B,FABP4,FAM129A,IRAK3,UCHL1,SOCS3,IGF1R,IGFBP3,PECAM1,PDE2A,PLEK,TNFAIP3,BMP4,SH3BP5,EDN1,EDNRB,ERRFI1,TARBP2,EPHA1"
GO: Biological Process	actin cytoskeleton organization	3.83E-05	8.26E-04	29	485	"FSCN1,TRPV4,CNN1,F2RL1,WAS,LIMCH1,ANG,PECAM1,CORO1A,PLEK,KCTD13,INF2,ICAM1,TNNT2,SSH3,BCL6,DIAPH1,PAM,CAPG,EDN1,HCLS1,FOXP1,LCP1,EPHA1,KANK1,ELN,RAC2,CXCL1,ANKRD1"
GO: Biological Process	muscle structure development	4.06E-05	8.70E-04	31	537	"CHRNB1,HOXD10,NR4A1,ADM,COL14A1,UCHL1,IGFBP3,CYP26B1,MAFF,FOS,ATF3,MBNL3,DCN,TNNT2,BMP4,BMP2,RAMP2,CXCL10,MYC,EDN1,EDNRB,LY6E,TAGLN,BTG2,EPAS1,FOXP1,LGALS1,ELN,LAMA2,EGR1,ANKRD1"
GO: Biological Process	platelet activation	4.09E-05	8.74E-04	18	230	"FCER1G,FIGF,COL1A1,CLU,F2R,COL3A1,PECAM1,FN1,PLEK,TGFB2,TGFB3,THBS1,THBD,TIMP1,ITGB3,SERPINE1,CD9,RAC2"
GO: Biological Process	granulocyte chemotaxis	4.16E-05	8.85E-04	10	79	"FCER1G,SELL,CCL2,PDE4B,TGFB2,THBS1,EDN1,SPP1,CXCL1,CD74"
GO: Biological Process	negative regulation of lipid storage	4.28E-05	9.05E-04	5	16	"ABCA1,PPARG,ITGB3,ITGAV,ABCG1"
GO: Biological Process	neutrophil chemotaxis	4.33E-05	9.12E-04	9	64	"FCER1G,SELL,CCL2,PDE4B,TGFB2,EDN1,SPP1,CXCL1,CD74"
GO: Biological Process	positive regulation of endothelial cell migration	4.45E-05	9.35E-04	8	50	"ANXA3,ANGPT4,THBS1,KDR,ITGB3,BMP4,EDN1,PTGS2"
GO: Biological Process	cell junction assembly	4.53E-05	9.47E-04	16	190	"TRPV4,FBLIM1,FN1,PLEC,THBS1,GJB2,KDR,ITGB3,ITGAV,ITGA6,RAMP2,CLDN15,FZD5,CD9,CDH11,CDH5"
GO: Biological Process	regulation of kinase activity	4.66E-05	9.70E-04	38	725	"FGF13,CDKN2C,ADARB1,PRKAR2B,PIK3IP1,FABP4,F2R,ANG,IRAK3,IL6R,UCHL1,SOCS3,IGF1R,CCL2,ANGPT4,ATF3,PIM1,KDELR3,TGFB2,TGFB3,THBS1,GHR,TNFAIP3,ITGB3,BMP4,BMP2,CCNYL1,NLRC5,SH3BP5,EDN1,ERRFI1,TARBP2,FZD5,IRS2,EPHA1,CD4,NGF,CD74"
GO: Biological Process	actin filament organization	4.68E-05	9.70E-04	19	254	"FSCN1,TRPV4,F2RL1,WAS,ANG,PECAM1,CORO1A,PLEK,KCTD13,ICAM1,TNNT2,SSH3,DIAPH1,CAPG,HCLS1,LCP1,EPHA1,KANK1,ELN"
GO: Biological Process	muscle tissue development	4.76E-05	9.81E-04	23	345	"HOXD10,NR4A1,ALDH1A2,COL14A1,IGFBP3,CYP26B1,MAFF,FOS,HSPG2,ATF3,MBNL3,DCN,TGFB2,TNNT2,BMP4,BMP2,MYC,LY6E,BTG2,FOXP1,ELN,EGR1,ANKRD1"
GO: Biological Process	response to copper ion	4.77E-05	9.81E-04	6	26	"SOD3,MT1H,CP,ICAM1,PAM,LOXL2"
GO: Biological Process	response to corticosteroid	5.06E-05	1.04E-03	13	133	"CDO1,ADM,COL1A1,FAS,CCL2,PLAT,FOS,GHR,JUNB,BMP4,PAM,PTGS2,NGF"
GO: Biological Process	negative regulation of programmed cell death	5.07E-05	1.04E-03	39	755	"FCER1G,CEBPB,HMOX1,IER3,F2R,SOCS3,IGF1R,FAS,CCL2,FN1,ANGPT4,CTSH,PIM1,TGFB2,TGFB3,THBS1,TIMP1,KDR,TNFAIP3,JAK3,TMEM132A,BCL6,NR4A3,ITGAV,BMP4,SERPINE1,RAMP2,MYC,EDN1,EDNRB,SLC25A27,BTG2,HCLS1,DPEP1,IRS2,SPP1,NGF,EGR1,CD74"
GO: Biological Process	positive regulation of angiogenesis	5.39E-05	1.09E-03	11	98	"HMOX1,ADM,ANXA3,ANGPT4,CTSH,THBS1,KDR,SERPINE1,RAMP2,PTGS2,EPHA1"
GO: Biological Process	cellular response to inorganic substance	5.39E-05	1.09E-03	11	98	"PPARG,HMOX1,MT1H,FABP4,ALOX5AP,FAS,FN1,FOS,JUNB,FSTL3,DPEP1"
GO: Biological Process	phagocytosis	5.47E-05	1.10E-03	16	193	"FCER1G,ABCA1,ELMOD1,F2RL1,CD302,WAS,MBL2,ANXA3,PECAM1,CORO1A,CCL2,IRF8,GULP1,TGM2,THBS1,ITGAV"
GO: Biological Process	granulocyte migration	5.76E-05	1.16E-03	10	82	"FCER1G,SELL,CCL2,PDE4B,TGFB2,THBS1,EDN1,SPP1,CXCL1,CD74"
GO: Biological Process	response to reactive oxygen species	5.86E-05	1.17E-03	14	154	"SOD3,FKBP1B,HMOX1,COL1A1,FOS,TNFAIP3,NR4A3,ITGAV,PXDN,DPEP1,GPX3,LCN2,NGF,FBLN5"
GO: Biological Process	negative regulation of cytokine production	5.86E-05	1.17E-03	14	154	"PPARG,HMOX1,ZC3H12A,F2RL1,IRAK3,IL6R,TGFB2,TGFB3,THBS1,TNFAIP3,JAK3,BCL6,NLRC5,C1QTNF3"
GO: Biological Process	cellular response to interferon-gamma	5.93E-05	1.18E-03	11	99	"PPARG,HLA-DQA1,HLA-B,IFNGR1,SOCS3,CCL2,IRF8,ICAM1,IFI30,NLRC5,GBP1"
GO: Biological Process	lymphocyte apoptotic process	6.26E-05	1.24E-03	9	67	"BCL2L11,FAS,TGFB2,JAK3,BCL6,BMP4,MYC,IRS2,CD74"
GO: Biological Process	negative regulation of kinase activity	6.58E-05	1.29E-03	16	196	"CDKN2C,ADARB1,PRKAR2B,PIK3IP1,FABP4,IRAK3,UCHL1,SOCS3,IGF1R,TNFAIP3,BMP4,SH3BP5,ERRFI1,TARBP2,IRS2,EPHA1"
GO: Biological Process	negative regulation of molecular function	6.95E-05	1.36E-03	42	849	"PPARG,CDKN2C,ADARB1,FKBP1B,NR4A1,HMOX1,PRKAR2B,PIK3IP1,FABP4,ZC3H12A,ANXA3,IRAK3,UCHL1,SOCS3,IGF1R,PECAM1,PI16,PIM1,CRY2,TGFB2,THBS1,TIMP1,TIMP3,TNFAIP3,TNNT2,PI15,BMP4,SERPINE1,NLRC5,GSTO1,SH3BP5,MYC,EDNRB,ERRFI1,BHLHE40,SPINT2,TARBP2,DPEP1,IRS2,EPHA1,CHCHD10,SPINK8"
GO: Biological Process	response to metal ion	7.10E-05	1.38E-03	19	262	"PPARG,SOD3,HMOX1,MT1H,FABP4,ALOX5AP,CP,FAS,FN1,FOS,ICAM1,THBS1,TNNT2,JUNB,PAM,FSTL3,PTGS2,LOXL2,DPEP1"
GO: Biological Process	negative regulation of macrophage cytokine production	7.13E-05	1.38E-03	3	4	"IRAK3,TGFB2,TGFB3"
GO: Biological Process	regulation of mast cell cytokine production	7.13E-05	1.38E-03	3	4	"FCER1G,HMOX1,BCL6"
GO: Biological Process	defense response to bacterium	7.24E-05	1.40E-03	15	177	"FCER1G,NLRP1,F2RL1,HLA-B,MBL2,CFP,ANXA3,STAB2,IL6R,IRF8,CLEC4M,SERPINE1,TNFSF8,CD4,SPN"
GO: Biological Process	regulation of protein phosphorylation	7.27E-05	1.40E-03	45	935	"FGF13,CDKN2C,GDF6,ADARB1,AGER,PRKAR2B,FABP4,FAM129A,F2R,ANG,IRAK3,IL6R,UCHL1,SOCS3,IGF1R,IGFBP3,PECAM1,CCL2,ANGPT4,ATF3,PIM1,KDELR3,ICAM1,TGFB2,TGFB3,THBS1,KDR,GHR,TNFAIP3,ITGB3,BMP4,BMP2,CCNYL1,SH3BP5,EDN1,EDNRB,ERRFI1,HCLS1,TARBP2,FZD5,EPHA1,CD4,SPN,NGF,CD74"
GO: Biological Process	negative regulation of cellular protein metabolic process	7.34E-05	1.40E-03	29	503	"CDKN2C,ADARB1,AGER,PRKAR2B,CIRBP,FABP4,FAM129A,ANG,IRAK3,UCHL1,SOCS3,IGF1R,IGFBP3,PECAM1,PLAT,TIMP1,TIMP3,TNFAIP3,BMP4,KLF15,SH3BP5,EDN1,EDNRB,ACER2,ERRFI1,BTG2,IGF2BP1,TARBP2,EPHA1"
GO: Biological Process	negative regulation of transport	7.67E-05	1.46E-03	23	356	"PPARG,FKBP1B,HMOX1,ABCG5,F2RL1,F2R,PDE2A,ICAM1,TGFB2,THBS1,RHBDF2,YRDC,LRRC32,ITGB3,ITGAV,GSTO1,MYC,EDN1,PTGS2,LITAF,C1QTNF3,IRS2,CD74"
GO: Biological Process	neuron projection development	7.68E-05	1.46E-03	41	825	"FGF13,TRPV4,PMP22,ADM,SEMA3F,AGER,S100A6,FRZB,UCHL1,COL5A1,IGF1R,COL3A1,FZD2,FAS,TYROBP,TNFRSF12A,TGFB2,RTN4RL2,SPON2,SSH3,NR4A3,ITGB3,ITGAV,DIAPH1,FZD7,DYNLT1,IL15RA,CACNB3,NBL1,BTG2,FZD5,FOXP1,KANK1,LGALS1,LAMA2,PDLIM5,RAC2,SPP1,CDH11,NGF,ANKRD1"
GO: Biological Process	regulation of leukocyte differentiation	7.79E-05	1.47E-03	17	220	"HLA-DQA1,HLA-B,HLA-DMA,IL4R,FAS,TYROBP,FOS,KLF10,JAK3,BCL6,ITGB3,BMP4,IL15RA,FSTL3,MYC,HCLS1,CD74"
GO: Biological Process	myeloid cell activation involved in immune response	7.87E-05	1.48E-03	8	54	"FCER1G,HMOX1,CPLX2,F2RL1,ANXA3,TLR7,TYROBP,PRAM1"
GO: Biological Process	regulation of acute inflammatory response	7.92E-05	1.49E-03	9	69	"FCER1G,PPARG,ALOX5AP,MBL2,CFP,OSMR,EDNRB,PTGS2,SPN"
GO: Biological Process	mesenchyme development	8.23E-05	1.54E-03	15	179	"SEMA3F,AGER,COL1A1,ALDH1A2,FRZB,RDH10,TGFB2,TGFB3,THBS1,BMP4,BMP2,MYC,EDN1,EDNRB,LOXL2"
GO: Biological Process	cellular component morphogenesis	8.30E-05	1.55E-03	52	1142	"FGF13,PMP22,SEMA3F,AGER,COL1A1,FBLIM1,S100A6,FRZB,UCHL1,COL5A1,IGF1R,COL3A1,CORO1A,FZD2,CCL2,TYROBP,TNFRSF12A,FN1,ICAM1,TGFB2,TGFB3,KDR,COL18A1,SPON2,TNNT2,SSH3,BCL6,NR4A3,ITGB3,ITGAV,DIAPH1,BMP4,BMP2,FZD7,DYNLT1,EDN1,CACNB3,NBL1,LOXL2,FZD5,FOXP1,EPHA1,KANK1,CD9,LAMA2,PDLIM5,RAC2,SPP1,ZNF385A,CDH11,NGF,ANKRD1"
GO: Biological Process	negative regulation of apoptotic process	8.50E-05	1.58E-03	38	746	"FCER1G,CEBPB,HMOX1,IER3,F2R,SOCS3,IGF1R,FAS,CCL2,FN1,ANGPT4,CTSH,PIM1,TGFB2,TGFB3,THBS1,TIMP1,KDR,TNFAIP3,JAK3,BCL6,NR4A3,ITGAV,BMP4,SERPINE1,RAMP2,MYC,EDN1,EDNRB,SLC25A27,BTG2,HCLS1,DPEP1,IRS2,SPP1,NGF,EGR1,CD74"
GO: Biological Process	regulation of macrophage cytokine production	8.82E-05	1.63E-03	4	10	"IRAK3,TGFB2,TGFB3,CD74"
GO: Biological Process	behavior	9.32E-05	1.71E-03	34	641	"CHRNB1,FGF13,HOXD10,FIGF,SELL,SEMA3F,AGER,PRKAR2B,F2RL1,IL6R,UCHL1,CCL4,CCL2,FN1,FOS,ADAM22,CLN6,THBS1,KDR,GM2A,NR4A3,SERPINE1,CXCL10,EDN1,ARRDC3,PTGS2,NAGLU,NBL1,BTG2,ZNF385A,NGF,EGR1,STAT3,CD74"
GO: Biological Process	regulation of angiogenesis	9.33E-05	1.71E-03	15	181	"HMOX1,ADM,ANXA3,CCL2,ANGPT4,CTSH,THBS1,KDR,TNFAIP3,SERPINE1,RAMP2,CXCL10,PTGS2,EPHA1,SULF1"
GO: Biological Process	negative regulation of catalytic activity	9.65E-05	1.76E-03	35	669	"PPARG,CDKN2C,ADARB1,FKBP1B,NR4A1,PRKAR2B,PIK3IP1,FABP4,ANXA3,IRAK3,UCHL1,SOCS3,IGF1R,PECAM1,PI16,CRY2,TGFB2,THBS1,TIMP1,TIMP3,TNFAIP3,TNNT2,PI15,BMP4,SERPINE1,SH3BP5,EDNRB,ERRFI1,SPINT2,TARBP2,DPEP1,IRS2,EPHA1,CHCHD10,SPINK8"
GO: Biological Process	muscle organ development	9.86E-05	1.80E-03	23	362	"HOXD10,NR4A1,COL14A1,IGFBP3,CYP26B1,MAFF,FOS,ATF3,MBNL3,DCN,TNNT2,BMP4,BMP2,CXCL10,MYC,LY6E,TAGLN,BTG2,FOXP1,ELN,LAMA2,EGR1,ANKRD1"
GO: Biological Process	reactive oxygen species metabolic process	9.96E-05	1.81E-03	13	142	"SOD3,AGER,IER3,ZC3H12A,F2RL1,PLAU,THBS1,CYBB,EDN1,PXDN,GPX3,RAC2,FBLN5"
GO: Biological Process	positive regulation of cellular biosynthetic process	1.05E-04	1.89E-03	62	1451	"ABCA1,PPARG,HOXB9,CEBPB,GDF6,HOXD10,NR4A1,HMOX1,ADM,COL1A1,CIRBP,F2RL1,FAM129A,F2R,LDB2,TLR7,IGF1R,FZD2,IRF8,FOS,KCTD13,ICAM1,TGFB3,THBS1,DBP,HMGN3,GNAL,RBM3,JAK3,JUNB,NR4A3,BMP4,SERPINE1,BMP2,KLF15,ITGA6,RAMP2,NLRC5,FZD7,TEF,FSTL3,MYC,EDN1,ECE1,PTGS2,BTG2,HCLS1,AKAP12,RUNX2,FZD5,EPAS1,FOXP1,IRS2,TNFSF8,CREB3L1,ELF4,CD4,SPN,ZBTB16,EGR1,STAT3,ANKRD1"
GO: Biological Process	neuron development	1.05E-04	1.89E-03	45	950	"FGF13,TRPV4,HOXD10,PMP22,ADM,SEMA3F,AGER,S100A6,FRZB,UCHL1,COL5A1,IGF1R,COL3A1,FZD2,FAS,TYROBP,TNFRSF12A,TGFB2,FAT4,RTN4RL2,SPON2,SSH3,NR4A3,ITGB3,ITGAV,DIAPH1,FZD7,DYNLT1,IL15RA,EDNRB,CACNB3,NAGLU,NBL1,BTG2,FZD5,FOXP1,KANK1,LGALS1,LAMA2,PDLIM5,RAC2,SPP1,CDH11,NGF,ANKRD1"
GO: Biological Process	extracellular matrix disassembly	1.06E-04	1.90E-03	10	88	"COL1A1,COL14A1,COL12A1,COL5A1,COL8A1,COL3A1,CTSK,MMP3,TIMP1,COL18A1"
GO: Biological Process	actin polymerization or depolymerization	1.07E-04	1.91E-03	13	143	"F2RL1,WAS,ANG,PECAM1,CORO1A,PLEK,ICAM1,SSH3,DIAPH1,CAPG,HCLS1,KANK1,ELN"
GO: Biological Process	cell-matrix adhesion	1.16E-04	2.06E-03	14	164	"BCL2L11,COL3A1,FN1,PLAU,THBS1,KDR,BCL6,ITGB3,ITGAV,SERPINE1,ITGA6,ACER2,EPHA1,FBLN5"
GO: Biological Process	response to glucocorticoid	1.16E-04	2.06E-03	12	125	"CDO1,ADM,FAS,CCL2,PLAT,FOS,GHR,JUNB,BMP4,PAM,PTGS2,NGF"
GO: Biological Process	neuron differentiation	1.17E-04	2.06E-03	53	1187	"FGF13,CEBPB,GDF6,TRPV4,HOXD10,PMP22,ADM,SEMA3F,AGER,ALDH1A2,S100A6,FRZB,UCHL1,COL5A1,IGF1R,COL3A1,FZD2,FAS,TYROBP,TNFRSF12A,TGIF1,TGFB2,FAT4,RTN4RL2,SPON2,SSH3,NR4A3,ITGB3,ITGAV,DIAPH1,BMP4,BMP2,FZD7,DYNLT1,IL15RA,EDNRB,CACNB3,NAGLU,NBL1,BTG2,FZD5,FOXP1,KANK1,LGALS1,LAMA2,PDLIM5,RAC2,SPP1,CDH11,NGF,NNAT,STAT3,ANKRD1"
GO: Biological Process	transforming growth factor beta receptor signaling pathway	1.19E-04	2.10E-03	15	185	"FBN2,PPP1R15A,COL3A1,CCL2,FOS,TGIF1,TGFB2,TGFB3,KLF10,THBS1,PMEPA1,JUNB,SERPINE1,BMP2,MYC"
GO: Biological Process	myeloid leukocyte activation	1.23E-04	2.16E-03	13	145	"FCER1G,HMOX1,CPLX2,ZC3H12A,F2RL1,ANXA3,IL4R,TLR7,TYROBP,RELB,THBS1,PRAM1,CD74"
GO: Biological Process	collagen catabolic process	1.24E-04	2.17E-03	9	73	"COL1A1,COL14A1,COL12A1,COL5A1,COL8A1,COL3A1,CTSK,MMP3,COL18A1"
GO: Biological Process	actin filament-based process	1.25E-04	2.18E-03	31	571	"FSCN1,TRPV4,SELE,CNN1,F2RL1,WAS,LIMCH1,ANG,PECAM1,CORO1A,PDE4B,PLEK,KCTD13,INF2,ICAM1,TNNT2,SSH3,BCL6,DIAPH1,PAM,CAPG,EDN1,HCLS1,FOXP1,LCP1,EPHA1,KANK1,ELN,RAC2,CXCL1,ANKRD1"
GO: Biological Process	ossification	1.26E-04	2.18E-03	21	320	"FBN2,CEBPB,COL1A1,IL6R,CTSK,HSPG2,TGFB2,TGFB3,KLF10,FAT4,JUNB,BMP4,BMP2,FSTL3,PTGS2,RUNX2,CREB3L1,IFITM5,SPP1,ZBTB16,CDH11"
GO: Biological Process	negative regulation of protein phosphorylation	1.26E-04	2.18E-03	18	251	"CDKN2C,ADARB1,AGER,PRKAR2B,FABP4,FAM129A,IRAK3,UCHL1,SOCS3,IGF1R,IGFBP3,PECAM1,TNFAIP3,BMP4,SH3BP5,ERRFI1,TARBP2,EPHA1"
GO: Biological Process	ear development	1.33E-04	2.29E-03	16	208	"HLA-B,HLA-DMA,BCL2L11,FRZB,FZD2,RDH10,TGFB3,FAT4,NR4A3,BMP4,BMP2,MYC,EDN1,SLC25A27,ECE1,NAGLU"
GO: Biological Process	negative regulation of developmental process	1.33E-04	2.29E-03	34	653	"ABCA1,PPARG,FGF13,SEMA3F,LDB2,IL4R,FRZB,CCL2,ANGPT4,MBNL3,TGFB2,KLF10,THBS1,JAK3,BCL6,ITGB3,ITGAV,BMP4,SERPINE1,BMP2,FZD7,DYNLT1,CXCL10,FSTL3,MYC,EDNRB,ABCG1,FOXP1,KANK1,SULF1,SPP1,ZBTB16,STAT3,CD74"
GO: Biological Process	response to oxidative stress	1.34E-04	2.29E-03	20	298	"SOD3,FKBP1B,HMOX1,COL1A1,MBL2,MGST1,FOS,PDLIM1,TNFAIP3,NR4A3,ITGAV,PTGS2,PXDN,DPEP1,EPAS1,GPX3,LCN2,NGF,FBLN5,CYGB"
GO: Biological Process	connective tissue development	1.34E-04	2.29E-03	17	230	"ACTA2,COL1A1,FRZB,COL5A1,HSPG2,TGFB2,THBS1,GHR,BMP4,BMP2,EDN1,ARRDC3,LOXL2,RUNX2,SULF1,ZBTB16,EGR1"
GO: Biological Process	blood circulation	1.35E-04	2.29E-03	25	419	"PPARG,ACTA2,FKBP1B,HMOX1,ADM,ADRA1D,IER3,F2RL1,F2R,CCL4,PDE2A,PDE4B,ICAM1,TGFB2,TNNT2,RAMP2,CXCL10,GSTO1,EDN1,EDNRB,ECE1,PTGS2,CELF2,EPAS1,ELN"
GO: Biological Process	positive regulation of Rho protein signal transduction	1.36E-04	2.29E-03	4	11	"F2RL1,F2R,COL3A1,GPR56"
GO: Biological Process	macrophage cytokine production	1.36E-04	2.29E-03	4	11	"IRAK3,TGFB2,TGFB3,CD74"
GO: Biological Process	generation of neurons	1.37E-04	2.31E-03	56	1284	"PPARG,FGF13,CEBPB,GDF6,TRPV4,HOXD10,PMP22,ADM,SEMA3F,AGER,ALDH1A2,MAN2A1,S100A6,FRZB,UCHL1,COL5A1,IGF1R,COL3A1,FZD2,FAS,TYROBP,TNFRSF12A,TGIF1,TGFB2,FAT4,RTN4RL2,GPR56,SPON2,SSH3,NR4A3,ITGB3,ITGAV,DIAPH1,BMP4,BMP2,FZD7,DYNLT1,IL15RA,EDNRB,CACNB3,NAGLU,NBL1,BTG2,FZD5,FOXP1,KANK1,LGALS1,LAMA2,PDLIM5,RAC2,SPP1,CDH11,NGF,NNAT,STAT3,ANKRD1"
GO: Biological Process	cell-cell junction organization	1.43E-04	2.40E-03	15	188	"PERP,TRPV4,CLDN1,TGFB2,TGFB3,THBS1,GJB2,KDR,ITGAV,RAMP2,CLDN15,FZD5,CD9,CDH11,CDH5"
GO: Biological Process	circulatory system process	1.45E-04	2.43E-03	25	421	"PPARG,ACTA2,FKBP1B,HMOX1,ADM,ADRA1D,IER3,F2RL1,F2R,CCL4,PDE2A,PDE4B,ICAM1,TGFB2,TNNT2,RAMP2,CXCL10,GSTO1,EDN1,EDNRB,ECE1,PTGS2,CELF2,EPAS1,ELN"
GO: Biological Process	JAK-STAT cascade	1.46E-04	2.44E-03	12	128	"AGER,F2R,IL6R,SOCS3,PECAM1,CCL2,GHR,JAK3,IL15RA,HCLS1,IRS2,STAT3"
GO: Biological Process	vascular process in circulatory system	1.50E-04	2.49E-03	14	168	"ACTA2,HMOX1,ADM,ADRA1D,F2RL1,F2R,CCL4,PDE2A,ICAM1,RAMP2,EDN1,EDNRB,ECE1,PTGS2"
GO: Biological Process	response to tumor necrosis factor	1.55E-04	2.56E-03	11	110	"SELE,TNFRSF19,F2RL1,FAS,CCL2,ICAM1,EDN1,PTGS2,LCN2,AFF3,ANKRD1"
GO: Biological Process	regulation of epithelial cell migration	1.55E-04	2.56E-03	11	110	"AGER,ANXA3,ANGPT4,CTSH,TGFB2,THBS1,KDR,ITGB3,BMP4,EDN1,PTGS2"
GO: Biological Process	regulation of protein kinase activity	1.57E-04	2.58E-03	35	686	"FGF13,CDKN2C,ADARB1,PRKAR2B,FABP4,F2R,ANG,IRAK3,IL6R,UCHL1,SOCS3,IGF1R,CCL2,ANGPT4,ATF3,PIM1,KDELR3,TGFB2,TGFB3,THBS1,GHR,TNFAIP3,ITGB3,BMP4,BMP2,CCNYL1,SH3BP5,EDN1,ERRFI1,TARBP2,FZD5,EPHA1,CD4,NGF,CD74"
GO: Biological Process	negative regulation of signal transduction	1.62E-04	2.65E-03	41	854	"FBN2,PPARG,HMOX1,ADM,PIK3IP1,CLU,F2RL1,IRAK3,PPP1R15A,FRZB,UCHL1,SOCS3,IGF1R,IGFBP3,CYP26B1,PLEK,KCTD13,TGIF1,TGFB3,THBS1,PMEPA1,TNFAIP3,BCL6,ITGAV,BMP4,SERPINE1,BMP2,ITGA6,NLRC5,FSTL3,MYC,ERRFI1,PXDN,NBL1,RUNX2,KANK1,PTCH2,SULF1,ZNF385A,EGR1,CD74"
GO: Biological Process	adaptive immune response	1.69E-04	2.77E-03	18	257	"FCER1G,CLU,HLA-B,HLA-DMA,MBL2,IL4R,FAS,CTSS,CTSH,ICAM1,RELB,TNFAIP3,JAK3,BCL6,C1R,SWAP70,SPN,CD74"
GO: Biological Process	mast cell cytokine production	1.75E-04	2.85E-03	3	5	"FCER1G,HMOX1,BCL6"
GO: Biological Process	sensory organ development	1.81E-04	2.95E-03	28	504	"HLA-B,ALDH1A2,HLA-DMA,BCL2L11,MAN2A1,FRZB,COL5A1,COL8A1,FZD2,CYP26B1,RDH10,TGIF1,TGFB2,TGFB3,FAT4,CYP1B1,NR4A3,BMP4,BMP2,MYC,EDN1,FJX1,SLC25A27,ECE1,NAGLU,FZD5,NHS,STAT3"
GO: Biological Process	adaptive immune response based on somatic recombination of immune receptors built from immunoglobulin superfamily domains	1.83E-04	2.96E-03	17	236	"FCER1G,CLU,HLA-B,HLA-DMA,MBL2,IL4R,FAS,CTSH,ICAM1,RELB,TNFAIP3,JAK3,BCL6,C1R,SWAP70,SPN,CD74"
GO: Biological Process	positive regulation of ossification	1.86E-04	3.00E-03	7	46	"FBN2,TGFB2,TGFB3,BMP4,BMP2,RUNX2,ZBTB16"
GO: Biological Process	cell morphogenesis involved in differentiation	1.95E-04	3.13E-03	38	777	"FGF13,SEMA3F,AGER,COL1A1,S100A6,FRZB,UCHL1,COL5A1,IGF1R,COL3A1,FZD2,TYROBP,TNFRSF12A,FN1,TGFB2,TGFB3,COL18A1,SPON2,SSH3,NR4A3,ITGB3,ITGAV,BMP4,BMP2,FZD7,CACNB3,LOXL2,FZD5,FOXP1,EPHA1,KANK1,LAMA2,PDLIM5,RAC2,SPP1,ZNF385A,CDH11,NGF"
GO: Biological Process	negative regulation of smooth muscle cell proliferation	1.96E-04	3.14E-03	6	33	"PPARG,HMOX1,ANG,IGFBP3,TNFAIP3,OGN"
GO: Biological Process	positive regulation of gene expression	1.97E-04	3.14E-03	54	1242	"PPARG,HOXB9,CEBPB,GDF6,HOXD10,NR4A1,AGER,COL1A1,ZC3H12A,F2RL1,F2R,ALDH1A2,LDB2,FZD2,PDE2A,CYP26B1,IRF8,FOS,CTSH,RELB,TGFB2,TGFB3,DBP,HMGN3,JAK3,JUNB,LRRC32,NR4A3,BMP4,SERPINE1,BMP2,KLF15,ITGA6,RAMP2,NLRC5,FZD7,TEF,FSTL3,MYC,BTG2,HCLS1,RUNX2,FZD5,EPAS1,FOXP1,TNFSF8,CREB3L1,ELF4,LCN2,ZBTB16,NGF,EGR1,STAT3,ANKRD1"
GO: Biological Process	mesenchymal cell differentiation	1.98E-04	3.15E-03	13	152	"SEMA3F,AGER,COL1A1,ALDH1A2,FRZB,RDH10,TGFB2,TGFB3,BMP4,BMP2,EDN1,EDNRB,LOXL2"
GO: Biological Process	neutrophil activation involved in immune response	1.99E-04	3.17E-03	4	12	"FCER1G,ANXA3,TYROBP,PRAM1"
GO: Biological Process	protein secretion	2.05E-04	3.24E-03	16	216	"ABCA1,NLRP1,F2RL1,F2R,ANG,IL4R,PLEK,TGFB2,TGFB3,RHBDF2,LRRC32,CLEC4M,PAM,CXCL10,C1QTNF3,ANKRD1"
GO: Biological Process	positive regulation of immune response	2.07E-04	3.24E-03	28	508	"FCER1G,CLU,F2RL1,WAS,HLA-DQA1,HLA-B,HLA-DMA,MBL2,CFP,LY96,IRAK3,TLR7,PDE4B,CTSS,FOS,CTSK,MNDA,TGFB2,TNFAIP3,JAK3,LRRC32,POLR3D,C1R,CACNB3,RFTN1,CD4,LAG3,CD74"
GO: Biological Process	leukocyte homeostasis	2.07E-04	3.24E-03	9	78	"FCER1G,BCL2L11,CORO1A,FAS,PDE4B,TGFB2,TNFAIP3,JAK3,CD74"
GO: Biological Process	negative regulation of T cell activation	2.07E-04	3.24E-03	9	78	"HLA-DQA1,IL4R,JAK3,BCL6,LRRC32,BMP4,SPN,LAG3,CD74"
GO: Biological Process	enzyme linked receptor protein signaling pathway	2.11E-04	3.31E-03	45	980	"FBN2,GDF6,FIGF,NR4A1,PRKAR2B,SGPL1,BCL2L11,PPP1R15A,SOCS3,MPZL1,IGF1R,COL3A1,IGFBP3,PTPRU,CCL2,ANGPT4,PLAT,FOS,TGIF1,TGFB2,TGFB3,KLF10,THBS1,KDR,PMEPA1,GHR,JAK3,JUNB,ITGB3,BMP4,SERPINE1,BMP2,FSTL3,MYC,ERRFI1,NBL1,RUNX2,IRS2,EPHA1,KANK1,CD4,SULF1,NGF,EGR1,STAT3"
GO: Biological Process	negative regulation of leukocyte apoptotic process	2.13E-04	3.32E-03	7	47	"FCER1G,JAK3,BCL6,BMP4,HCLS1,IRS2,CD74"
GO: Biological Process	negative regulation of phosphorylation	2.15E-04	3.34E-03	18	262	"CDKN2C,ADARB1,AGER,PRKAR2B,FABP4,FAM129A,IRAK3,UCHL1,SOCS3,IGF1R,IGFBP3,PECAM1,TNFAIP3,BMP4,SH3BP5,ERRFI1,TARBP2,EPHA1"
GO: Biological Process	negative regulation of signaling	2.19E-04	3.39E-03	42	895	"FBN2,PPARG,HMOX1,ADM,PIK3IP1,CLU,F2RL1,IRAK3,PPP1R15A,FRZB,UCHL1,SOCS3,IGF1R,IGFBP3,CYP26B1,PLEK,KCTD13,TGIF1,TGFB3,THBS1,PMEPA1,TNFAIP3,BCL6,ITGAV,BMP4,SERPINE1,BMP2,ITGA6,NLRC5,FSTL3,MYC,PTGS2,ERRFI1,PXDN,NBL1,RUNX2,KANK1,PTCH2,SULF1,ZNF385A,EGR1,CD74"
GO: Biological Process	neutrophil activation	2.26E-04	3.49E-03	5	22	"FCER1G,F2RL1,ANXA3,TYROBP,PRAM1"
GO: Biological Process	response to virus	2.33E-04	3.58E-03	19	287	"ACTA2,ADARB1,CLU,F2RL1,BCL2L11,IRAK3,IFNGR1,TLR7,CCL4,CXCL9,TNFAIP3,POLR3D,NLRC5,CXCL10,GBP1,TARBP2,CD4,SPN,LCN2"
GO: Biological Process	negative regulation of cell communication	2.35E-04	3.60E-03	42	898	"FBN2,PPARG,HMOX1,ADM,PIK3IP1,CLU,F2RL1,IRAK3,PPP1R15A,FRZB,UCHL1,SOCS3,IGF1R,IGFBP3,CYP26B1,PLEK,KCTD13,TGIF1,TGFB3,THBS1,PMEPA1,TNFAIP3,BCL6,ITGAV,BMP4,SERPINE1,BMP2,ITGA6,NLRC5,FSTL3,MYC,PTGS2,ERRFI1,PXDN,NBL1,RUNX2,KANK1,PTCH2,SULF1,ZNF385A,EGR1,CD74"
GO: Biological Process	positive regulation of cell activation	2.36E-04	3.61E-03	18	264	"FCER1G,F2RL1,HLA-DQA1,HLA-DMA,IL4R,CORO1A,MAP3K8,CCL2,PLEK,THBS1,JAK3,BCL6,IL15RA,IRS2,LGALS1,CD4,SPN,CD74"
GO: Biological Process	multi-multicellular organism process	2.39E-04	3.65E-03	16	219	"ADM,UMPS,CCL2,MAFF,FOS,RPL29,TGFB3,THBD,TIMP1,JUNB,B4GALT1,RAMP2,PAM,EDN1,PTGS2,SPP1"
GO: Biological Process	myeloid cell differentiation	2.46E-04	3.74E-03	20	312	"PPARG,FAS,TYROBP,PDE2A,IRF8,FOS,RELB,KLF10,TIMP1,JUNB,BCL6,ITGB3,BMP4,FSTL3,MYC,HCLS1,EPAS1,SPIB,ZNF385A,ZBTB16"
GO: Biological Process	multicellular organismal catabolic process	2.51E-04	3.81E-03	9	80	"COL1A1,COL14A1,COL12A1,COL5A1,COL8A1,COL3A1,CTSK,MMP3,COL18A1"
GO: Biological Process	positive regulation of macromolecule biosynthetic process	2.60E-04	3.93E-03	57	1347	"PPARG,HOXB9,CEBPB,GDF6,HOXD10,NR4A1,HMOX1,COL1A1,CIRBP,F2RL1,FAM129A,F2R,LDB2,TLR7,IGF1R,FZD2,CCL2,IRF8,FOS,KCTD13,TGFB2,TGFB3,THBS1,DBP,KDR,HMGN3,RBM3,JAK3,JUNB,NR4A3,BMP4,SERPINE1,BMP2,KLF15,ITGA6,NLRC5,FZD7,TEF,FSTL3,MYC,EDN1,BTG2,HCLS1,RUNX2,FZD5,EPAS1,FOXP1,IRS2,TNFSF8,CREB3L1,ELF4,CD4,SPN,ZBTB16,EGR1,STAT3,ANKRD1"
GO: Biological Process	regulation of actin polymerization or depolymerization	2.67E-04	4.00E-03	11	117	"F2RL1,WAS,PECAM1,CORO1A,PLEK,ICAM1,SSH3,CAPG,HCLS1,KANK1,ELN"
GO: Biological Process	response to interferon-gamma	2.67E-04	4.00E-03	11	117	"PPARG,HLA-DQA1,HLA-B,IFNGR1,SOCS3,CCL2,IRF8,ICAM1,IFI30,NLRC5,GBP1"
GO: Biological Process	exocytosis	2.68E-04	4.00E-03	20	314	"FCER1G,FIGF,HMOX1,CPLX2,CLU,F2RL1,ANXA3,PECAM1,FN1,PLEK,TGFB2,TGFB3,THBS1,TIMP1,PRAM1,ITGB3,SERPINE1,B4GALT1,RAB3D,CD9"
GO: Biological Process	regulation of cellular localization	2.68E-04	4.00E-03	41	875	"FCER1G,PPARG,NLRP1,FKBP1B,HMOX1,PRKAR2B,IER3,F2RL1,F2R,MTNR1B,ANG,BCL2L11,IL4R,TLR7,PDE2A,TGFB2,TGFB3,RHBDF2,HMGN3,TNNT2,LRRC32,PRAM1,CLEC4M,DIAPH1,BMP4,B4GALT1,FZD7,PAM,GSTO1,EDN1,PTGS2,LITAF,C1QTNF3,RAB3D,HCLS1,IRS2,LCP1,KANK1,NGF,NNAT,ANKRD1"
GO: Biological Process	cellular response to endogenous stimulus	2.76E-04	4.11E-03	42	905	"FBN2,PPARG,CEBPB,NR4A1,COL1A1,PRKAR2B,PPP1R15A,SOCS3,IGF1R,COL3A1,CCL2,PDE2A,PDE4B,CTSS,FOS,CTSH,MMP3,ICAM1,TGIF1,TGFB2,TGFB3,KLF10,THBS1,PMEPA1,GHR,JAK3,JUNB,NR4A3,DIAPH1,BMP4,SERPINE1,BMP2,RAMP2,MYC,PTGS2,RUNX2,IRS2,KANK1,SULF1,EGR1,STAT3,ANKRD1"
GO: Biological Process	angiogenesis involved in wound healing	2.82E-04	4.16E-03	4	13	"TNFAIP3,ITGB3,SERPINE1,B4GALT1"
GO: Biological Process	surfactant homeostasis	2.82E-04	4.16E-03	4	13	"GPR116,CTSH,KDR,EPAS1"
GO: Biological Process	"phagocytosis, engulfment"	2.83E-04	4.16E-03	5	23	"FCER1G,ABCA1,F2RL1,GULP1,THBS1"
GO: Biological Process	B cell apoptotic process	2.83E-04	4.16E-03	5	23	"BCL2L11,BCL6,MYC,IRS2,CD74"
GO: Biological Process	cell projection organization	2.84E-04	4.16E-03	49	1111	"FGF13,TRPV4,PMP22,ADM,SEMA3F,AGER,F2RL1,S100A6,FRZB,UCHL1,COL5A1,IGF1R,COL3A1,CORO1A,FZD2,FAS,TYROBP,TNFRSF12A,PLEK,TGFB2,TGFB3,FAT4,RTN4RL2,SPON2,SSH3,NR4A3,ITGB3,ITGAV,DIAPH1,ITGA6,FZD7,DYNLT1,IL15RA,CAPG,CACNB3,NBL1,BTG2,FZD5,FOXP1,KANK1,LGALS1,LAMA2,PDLIM5,LCN2,RAC2,SPP1,CDH11,NGF,ANKRD1"
GO: Biological Process	regulation of actin filament length	2.88E-04	4.20E-03	11	118	"F2RL1,WAS,PECAM1,CORO1A,PLEK,ICAM1,SSH3,CAPG,HCLS1,KANK1,ELN"
GO: Biological Process	regulation of protein transport	3.03E-04	4.42E-03	22	366	"NLRP1,F2RL1,F2R,ANG,IL4R,TLR7,PDE2A,TGFB2,TGFB3,RHBDF2,LRRC32,CLEC4M,BMP4,FZD7,PAM,PTGS2,LITAF,C1QTNF3,HCLS1,LCP1,KANK1,ANKRD1"
GO: Biological Process	positive regulation of epithelial cell proliferation	3.16E-04	4.59E-03	12	139	"NR4A1,ANG,CCL2,KDR,TNFAIP3,ITGB3,BMP4,BMP2,B4GALT1,FZD7,MYC,FOXP1"
GO: Biological Process	acute-phase response	3.17E-04	4.59E-03	7	50	"CEBPB,MBL2,IL6R,FN1,EDNRB,PTGS2,STAT3"
GO: Biological Process	response to cold	3.23E-04	4.65E-03	6	36	"PPARG,ADM,CIRBP,FOS,RBM3,CXCL10"
GO: Biological Process	kidney development	3.24E-04	4.65E-03	16	225	"ACTA2,SGPL1,ALDH1A2,BCL2L11,PECAM1,CTSH,RDH10,DCN,FAT4,BMP4,KLF15,FSTL3,MYC,SULF1,ZBTB16,EGR1"
GO: Biological Process	multi-organism reproductive process	3.24E-04	4.65E-03	16	225	"ADM,UMPS,CCL2,MAFF,FOS,RPL29,TGFB3,THBD,TIMP1,JUNB,RAMP2,PAM,EDN1,EDNRB,PTGS2,SPP1"
GO: Biological Process	positive regulation of cytokine production	3.24E-04	4.65E-03	18	271	"FCER1G,NLRP1,FIGF,IL4R,IL6R,TLR7,CCL4,PDE4B,IRF8,THBS1,SERPINE1,POLR3D,PTGS2,HILPDA,FZD5,DTX4,SULF1,CD74"
GO: Biological Process	response to vitamin	3.30E-04	4.71E-03	8	66	"PPARG,FKBP1B,ALDH1A2,IGF1R,CCL2,CXCL10,PTGS2,SPP1"
GO: Biological Process	regulation of cellular protein metabolic process	3.32E-04	4.73E-03	61	1483	"PERP,FGF13,CDKN2C,GDF6,ADARB1,AGER,PRKAR2B,CIRBP,FABP4,CLU,FAM129A,F2R,ANG,IRAK3,PPP1R15A,IL6R,UCHL1,SOCS3,IGF1R,IGFBP3,PECAM1,CCL2,ANGPT4,PLAT,ATF3,PIM1,KDELR3,ICAM1,CLN6,TGFB2,TGFB3,THBS1,TIMP1,TIMP3,KDR,GHR,TNFAIP3,RBM3,ITGB3,BMP4,BMP2,KLF15,CCNYL1,SH3BP5,EDN1,EDNRB,ACER2,ARRDC3,ERRFI1,BTG2,IGF2BP1,HCLS1,TARBP2,FZD5,EPHA1,CD4,SPN,ZNF385A,NGF,EGR1,CD74"
GO: Biological Process	regeneration	3.33E-04	4.73E-03	11	120	"PPARG,ADM,FAS,CCL2,PLAU,RTN4RL2,NR4A3,FZD7,LCP1,ENO3,SPP1"
GO: Biological Process	negative regulation of receptor biosynthetic process	3.43E-04	4.84E-03	3	6	"PPARG,ITGB3,ITGAV"
GO: Biological Process	negative regulation of cholesterol storage	3.43E-04	4.84E-03	3	6	"ABCA1,PPARG,ABCG1"
GO: Biological Process	neuron death	3.44E-04	4.84E-03	17	249	"CEBPB,NLRP1,HMOX1,AGER,F2R,BCL2L11,FAS,CCL2,PLAU,TGFB2,TGFB3,GHR,NR4A3,SLC25A27,BTG2,NGF,EGR1"
GO: Biological Process	negative regulation of T cell differentiation	3.50E-04	4.88E-03	5	24	"IL4R,JAK3,BCL6,BMP4,CD74"
GO: Biological Process	JAK-STAT cascade involved in growth hormone signaling pathway	3.50E-04	4.88E-03	5	24	"SOCS3,GHR,JAK3,IRS2,STAT3"
GO: Biological Process	fibrinolysis	3.50E-04	4.88E-03	5	24	"PLAT,PLAU,THBS1,THBD,SERPINE1"
GO: Biological Process	sprouting angiogenesis	3.59E-04	4.99E-03	7	51	"NR4A1,THBS1,KDR,BMP4,RAMP2,PTGS2,LOXL2"
GO: Biological Process	cellular response to growth factor stimulus	3.61E-04	4.99E-03	32	634	"FBN2,FIGF,NR4A1,COL1A1,PRKAR2B,BCL2L11,PPP1R15A,COL3A1,CCL2,PDE2A,FOS,TGIF1,TGFB2,TGFB3,KLF10,THBS1,KDR,PMEPA1,JUNB,ITGB3,BMP4,SERPINE1,BMP2,RAMP2,MYC,RUNX2,IRS2,SULF1,NGF,EGR1,STAT3,ANKRD1"
GO: Biological Process	chordate embryonic development	3.61E-04	4.99E-03	32	634	"HOXB6,HOXB9,CEBPB,HOXD10,ADM,COL1A1,ALDH1A2,BCL2L11,MAN2A1,SOCS3,FZD2,MAFF,HSPG2,RDH10,ATP1B1,TGIF1,TGFB2,TGFB3,JUNB,ITGAV,BMP4,BMP2,EDN1,ECE1,LY6E,RUNX2,FZD5,EPAS1,FOXP1,LFNG,SULF1,PTPRR"
GO: Biological Process	negative regulation of protein kinase activity	3.63E-04	5.00E-03	14	183	"CDKN2C,ADARB1,PRKAR2B,FABP4,IRAK3,UCHL1,SOCS3,IGF1R,TNFAIP3,BMP4,SH3BP5,ERRFI1,TARBP2,EPHA1"
GO: Biological Process	regulation of endothelial cell migration	3.63E-04	5.00E-03	9	84	"AGER,ANXA3,ANGPT4,THBS1,KDR,ITGB3,BMP4,EDN1,PTGS2"
GO: Biological Process	positive regulation of phosphorylation	3.65E-04	5.01E-03	33	662	"FGF13,GDF6,AGER,PRKAR2B,FAM129A,F2R,ANG,IL6R,PECAM1,CCL2,ANGPT4,ATF3,PIM1,KDELR3,ICAM1,TGFB2,TGFB3,THBS1,KDR,GHR,ITGB3,BMP4,BMP2,ITGA6,FZD7,EDN1,EDNRB,HCLS1,FZD5,CD4,SPN,NGF,CD74"
GO: Biological Process	positive regulation of cytosolic calcium ion concentration	3.76E-04	5.14E-03	16	228	"CD52,TRPV4,FKBP1B,ADM,F2RL1,F2R,FZD2,TGM2,TGFB2,JAK3,ITGAV,DIAPH1,GSTO1,EDN1,EDNRB,CXCL1"
GO: Biological Process	endocytosis	3.80E-04	5.19E-03	27	501	"FCER1G,ABCA1,SNX33,ADM,SELE,ELMOD1,F2RL1,CD302,WAS,MBL2,ANXA3,STAB2,PECAM1,CORO1A,CCL2,IRF8,GULP1,CLEC10A,TGM2,THBS1,GHR,CLEC4M,ITGAV,SERPINE1,RAMP2,LDLRAD3,RIN1"
GO: Biological Process	regulation of innate immune response	3.87E-04	5.27E-03	18	275	"PPARG,F2RL1,HLA-B,LY96,IRAK3,IFNGR1,SOCS3,TLR7,CTSS,FOS,CTSK,TNFAIP3,LRRC32,POLR3D,NLRC5,RFTN1,LAG3,CD74"
GO: Biological Process	regulation of protein secretion	3.92E-04	5.32E-03	13	163	"NLRP1,F2RL1,F2R,ANG,IL4R,TGFB2,TGFB3,RHBDF2,LRRC32,CLEC4M,PAM,C1QTNF3,ANKRD1"
GO: Biological Process	embryonic organ development	4.09E-04	5.54E-03	24	425	"HOXB6,CEBPB,HOXD10,ADM,ALDH1A2,FRZB,SOCS3,FZD2,HSPG2,RDH10,TGFB2,TGFB3,KDR,JUNB,NR4A3,ITGAV,BMP4,BMP2,MYC,EDN1,NAGLU,RUNX2,FZD5,EPAS1"
GO: Biological Process	regulation of secretion	4.11E-04	5.55E-03	29	557	"FCER1G,PPARG,NLRP1,FKBP1B,HMOX1,PRKAR2B,F2RL1,F2R,MTNR1B,ANG,IL4R,TGFB2,TGFB3,RHBDF2,HMGN3,LRRC32,PRAM1,CLEC4M,B4GALT1,PAM,EDN1,EDNRB,C1QTNF3,RAB3D,IRS2,NGF,NNAT,CD74,ANKRD1"
GO: Biological Process	skeletal system morphogenesis	4.26E-04	5.71E-03	15	208	"FBN2,HOXB6,HOXD10,COL1A1,SGPL1,CYP26B1,HSPG2,RDH10,TGFB2,TGFB3,THBS1,GHR,BMP4,MYC,RUNX2"
GO: Biological Process	negative regulation of lipid transport	4.27E-04	5.71E-03	5	25	"ABCG5,THBS1,ITGB3,ITGAV,IRS2"
GO: Biological Process	positive regulation of epithelial to mesenchymal transition	4.27E-04	5.71E-03	5	25	"AGER,COL1A1,TGFB2,TGFB3,BMP2"
GO: Biological Process	granulocyte activation	4.27E-04	5.71E-03	5	25	"FCER1G,F2RL1,ANXA3,TYROBP,PRAM1"
GO: Biological Process	cell morphogenesis	4.31E-04	5.74E-03	47	1072	"FGF13,SEMA3F,AGER,COL1A1,FBLIM1,S100A6,FRZB,UCHL1,COL5A1,IGF1R,COL3A1,CORO1A,FZD2,CCL2,TYROBP,TNFRSF12A,FN1,ICAM1,TGFB2,TGFB3,KDR,COL18A1,SPON2,SSH3,BCL6,NR4A3,ITGB3,ITGAV,DIAPH1,BMP4,BMP2,FZD7,DYNLT1,CACNB3,NBL1,LOXL2,FZD5,FOXP1,EPHA1,KANK1,LAMA2,PDLIM5,RAC2,SPP1,ZNF385A,CDH11,NGF"
GO: Biological Process	positive regulation of leukocyte activation	4.32E-04	5.74E-03	17	254	"FCER1G,F2RL1,HLA-DQA1,HLA-DMA,IL4R,CORO1A,MAP3K8,CCL2,THBS1,JAK3,BCL6,IL15RA,IRS2,LGALS1,CD4,SPN,CD74"
GO: Biological Process	vasoconstriction	4.33E-04	5.74E-03	9	86	"ACTA2,ADM,ADRA1D,F2R,ICAM1,EDN1,EDNRB,ECE1,PTGS2"
GO: Biological Process	muscle cell development	4.37E-04	5.77E-03	12	144	"CHRNB1,ADM,COL14A1,UCHL1,IGFBP3,MBNL3,TNNT2,BMP4,RAMP2,EDN1,FOXP1,ANKRD1"
GO: Biological Process	regulation of peptidase activity	4.39E-04	5.78E-03	21	351	"PERP,PPARG,NLRP1,NR4A1,F2R,BCL2L11,FAS,FN1,CTSH,PI16,THBS1,TIMP1,TIMP3,PI15,SERPINE1,MYC,ACER2,SPINT2,DPEP1,NGF,SPINK8"
GO: Biological Process	lipid localization	4.40E-04	5.79E-03	18	278	"SLC27A3,ABCA1,PPARG,ABCG5,CLU,ZC3H12A,GPIHBP1,MEST,GULP1,THBS1,GM2A,ITGB3,ITGAV,STARD5,APOLD1,HILPDA,ABCG1,IRS2"
GO: Biological Process	biomineral tissue development	4.42E-04	5.79E-03	11	124	"FBN2,COL1A1,FAM20A,TGFB3,KLF10,BMP4,BMP2,PTGS2,CREB3L1,IFITM5,SPP1"
GO: Biological Process	embryo development	4.47E-04	5.83E-03	46	1044	"FBN2,HOXB6,HOXB9,CEBPB,HOXD10,ADM,COL1A1,ALDH1A2,BCL2L11,MAN2A1,FRZB,SOCS3,FZD2,CYP26B1,MAFF,HSPG2,RDH10,ATP1B1,TGIF1,TGFB2,TGFB3,THBD,KDR,TNFAIP3,ZFP57,JUNB,NR4A3,ITGAV,BMP4,BMP2,FZD7,MYC,EDN1,ECE1,NAGLU,LY6E,RUNX2,FZD5,EPAS1,FOXP1,LFNG,LAMA2,SULF1,ZBTB16,AFF3,PTPRR"
GO: Biological Process	embryo development ending in birth or egg hatching	4.48E-04	5.83E-03	32	642	"HOXB6,HOXB9,CEBPB,HOXD10,ADM,COL1A1,ALDH1A2,BCL2L11,MAN2A1,SOCS3,FZD2,MAFF,HSPG2,RDH10,ATP1B1,TGIF1,TGFB2,TGFB3,JUNB,ITGAV,BMP4,BMP2,EDN1,ECE1,LY6E,RUNX2,FZD5,EPAS1,FOXP1,LFNG,SULF1,PTPRR"
GO: Biological Process	aging	4.48E-04	5.83E-03	15	209	"ADM,ADRA1D,NEK6,CCL2,FOS,ICAM1,DCN,TGFB3,TIMP1,SERPINE1,EDN1,EDNRB,LOXL2,ENO3,C2orf40"
GO: Biological Process	response to alcohol	4.52E-04	5.86E-03	17	255	"CDO1,ALDH1A2,CCL2,FOS,ICAM1,GHR,JUNB,BMP4,RAMP2,PAM,CXCL10,EDN1,PTGS2,H6PD,SPP1,EGR1,STAT3"
GO: Biological Process	positive regulation of protein secretion	4.54E-04	5.87E-03	10	105	"NLRP1,F2RL1,F2R,ANG,IL4R,TGFB2,TGFB3,CLEC4M,C1QTNF3,ANKRD1"
GO: Biological Process	regulation of lymphocyte apoptotic process	4.56E-04	5.89E-03	7	53	"TGFB2,JAK3,BCL6,BMP4,MYC,IRS2,CD74"
GO: Biological Process	bone development	4.73E-04	6.09E-03	11	125	"COL1A1,CYP26B1,HSPG2,TGFB3,FAT4,THBS1,GHR,BMP4,BMP2,RUNX2,SULF1"
GO: Biological Process	regulation of cellular component biogenesis	4.84E-04	6.21E-03	24	430	"CLU,F2RL1,WAS,LDB2,BCL2L11,FBLIM1,PECAM1,CORO1A,FAS,IRF8,PLEK,ICAM1,TGFB3,THBS1,KDR,SSH3,CAPG,EDN1,HCLS1,FZD5,EPHA1,KANK1,ELN,PDLIM5"
GO: Biological Process	ovulation cycle process	4.89E-04	6.25E-03	10	106	"SGPL1,ANG,ICAM1,TGFB2,TGFB3,KDR,BMP4,PAM,CMPK1,LFNG"
GO: Biological Process	lymphocyte activation involved in immune response	4.89E-04	6.25E-03	10	106	"F2RL1,IL4R,ICAM1,RELB,TNFAIP3,JAK3,BCL6,SWAP70,LCP1,LGALS1"
GO: Biological Process	embryonic skeletal system development	5.06E-04	6.45E-03	11	126	"HOXB6,HOXB9,HOXD10,COL1A1,HSPG2,RDH10,TGFB2,TGFB3,BMP4,RUNX2,SULF1"
GO: Biological Process	response to growth factor	5.11E-04	6.50E-03	32	647	"FBN2,FIGF,NR4A1,COL1A1,PRKAR2B,BCL2L11,PPP1R15A,COL3A1,CCL2,PDE2A,FOS,TGIF1,TGFB2,TGFB3,KLF10,THBS1,KDR,PMEPA1,JUNB,ITGB3,BMP4,SERPINE1,BMP2,RAMP2,MYC,RUNX2,IRS2,SULF1,NGF,EGR1,STAT3,ANKRD1"
GO: Biological Process	chemical homeostasis within a tissue	5.16E-04	6.52E-03	4	15	"GPR116,CTSH,KDR,EPAS1"
GO: Biological Process	negative regulation of endothelial cell apoptotic process	5.16E-04	6.52E-03	4	15	"KDR,TNFAIP3,SERPINE1,RAMP2"
GO: Biological Process	membrane invagination	5.18E-04	6.53E-03	5	26	"FCER1G,ABCA1,F2RL1,GULP1,THBS1"
GO: Biological Process	regulation of lymphocyte activation	5.27E-04	6.62E-03	20	331	"HLA-DQA1,HLA-DMA,IL4R,CORO1A,MAP3K8,FAS,CCL2,MNDA,TNFAIP3,JAK3,BCL6,LRRC32,BMP4,IL15RA,IRS2,LGALS1,CD4,SPN,LAG3,CD74"
GO: Biological Process	protein localization to nucleus	5.67E-04	7.11E-03	18	284	"COL1A1,F2R,TLR7,PDE2A,CRY2,TGFB2,TGFB3,JAK3,BCL6,BMP4,FZD7,PTGS2,LITAF,C1QTNF3,HCLS1,KANK1,ZBTB16,STAT3"
GO: Biological Process	negative regulation of blood coagulation	5.82E-04	7.25E-03	6	40	"PLAT,PLAU,THBS1,THBD,SERPINE1,EDN1"
GO: Biological Process	negative regulation of hemostasis	5.82E-04	7.25E-03	6	40	"PLAT,PLAU,THBS1,THBD,SERPINE1,EDN1"
GO: Biological Process	protein trimerization	5.82E-04	7.25E-03	6	40	"COL1A1,ALOX5AP,MBL2,MGST1,C1QTNF3,LCN2"
GO: Biological Process	negative regulation of neuron migration	5.88E-04	7.31E-03	3	7	"COL3A1,GPR56,STAT3"
GO: Biological Process	positive regulation of protein transport	6.03E-04	7.47E-03	15	215	"NLRP1,F2RL1,F2R,ANG,IL4R,TLR7,TGFB2,TGFB3,CLEC4M,BMP4,PTGS2,C1QTNF3,HCLS1,KANK1,ANKRD1"
GO: Biological Process	regulation of cytokine-mediated signaling pathway	6.07E-04	7.50E-03	9	90	"PPARG,F2RL1,IRAK3,IFNGR1,SOCS3,NLRC5,EDN1,PXDN,CD74"
GO: Biological Process	embryonic appendage morphogenesis	6.18E-04	7.60E-03	11	129	"FBN2,HOXD10,ALDH1A2,BCL2L11,CYP26B1,RDH10,BMP4,ECE1,RUNX2,ZBTB16,AFF3"
GO: Biological Process	embryonic limb morphogenesis	6.18E-04	7.60E-03	11	129	"FBN2,HOXD10,ALDH1A2,BCL2L11,CYP26B1,RDH10,BMP4,ECE1,RUNX2,ZBTB16,AFF3"
GO: Biological Process	regulation of hydrolase activity	6.39E-04	7.84E-03	42	943	"PERP,PPARG,DOCK4,NLRP1,FKBP1B,NR4A1,SELE,PRKAR2B,ELMOD1,F2R,GPIHBP1,ANG,BCL2L11,PECAM1,FAS,CCL2,FN1,PLEK,CTSH,PI16,ATF3,CRY2,KDELR3,ICAM1,TGFB2,THBS1,TIMP1,TIMP3,TNNT2,BCL6,PI15,SERPINE1,BMP2,DYNLT1,MYC,ACER2,ERRFI1,SPINT2,DPEP1,EPHA1,NGF,SPINK8"
GO: Biological Process	regulation of protein modification process	6.49E-04	7.93E-03	50	1183	"FGF13,CDKN2C,GDF6,ADARB1,AGER,PRKAR2B,FABP4,CLU,FAM129A,F2R,ANG,IRAK3,IL6R,UCHL1,SOCS3,IGF1R,IGFBP3,PECAM1,CCL2,ANGPT4,ATF3,PIM1,KDELR3,ICAM1,TGFB2,TGFB3,THBS1,KDR,GHR,TNFAIP3,ITGB3,BMP4,BMP2,KLF15,CCNYL1,SH3BP5,EDN1,EDNRB,ACER2,ARRDC3,ERRFI1,HCLS1,TARBP2,FZD5,EPHA1,CD4,SPN,NGF,EGR1,CD74"
GO: Biological Process	regulation of Rho protein signal transduction	6.51E-04	7.95E-03	14	194	"ABCA1,DOCK4,F2RL1,F2R,COL3A1,PECAM1,KCTD13,ICAM1,GPR56,BCL6,DYNLT1,ERRFI1,EPHA1,KANK1"
GO: Biological Process	positive regulation of molecular function	6.55E-04	7.97E-03	53	1275	"PERP,PPARG,DOCK4,FGF13,NLRP1,SELE,AGER,PRKAR2B,ELMOD1,CLU,F2R,GPIHBP1,ANG,BCL2L11,ANXA3,IRAK3,IL6R,IGFBP3,FZD2,FAS,CCL2,FN1,ANGPT4,PLEK,CTSH,ATF3,PIM1,KDELR3,ICAM1,TGFB2,TGFB3,THBS1,GHR,HMGN3,TNNT2,GNAL,GM2A,ITGB3,BMP4,BMP2,GSTO1,MYC,EDN1,ACER2,ARRDC3,ERRFI1,FZD5,EPHA1,LFNG,CD4,CXCL1,NGF,CD74"
GO: Biological Process	protein targeting to nucleus	6.59E-04	7.97E-03	16	240	"F2R,TLR7,PDE2A,CRY2,TGFB2,TGFB3,JAK3,BCL6,BMP4,FZD7,PTGS2,LITAF,C1QTNF3,HCLS1,KANK1,STAT3"
GO: Biological Process	protein import into nucleus	6.59E-04	7.97E-03	16	240	"F2R,TLR7,PDE2A,CRY2,TGFB2,TGFB3,JAK3,BCL6,BMP4,FZD7,PTGS2,LITAF,C1QTNF3,HCLS1,KANK1,STAT3"
GO: Biological Process	response to purine-containing compound	6.59E-04	7.97E-03	11	130	"PPARG,CDO1,SELL,COL1A1,PDE2A,PLAT,FOS,GNAL,JUNB,PTGS2,EGR1"
GO: Biological Process	placenta development	6.70E-04	8.05E-03	12	151	"PPARG,CEBPB,ADM,ANG,SOCS3,DCN,JUNB,ITGAV,PTGS2,FZD5,EPAS1,SPP1"
GO: Biological Process	response to nutrient	6.70E-04	8.05E-03	12	151	"PPARG,FKBP1B,HMOX1,ABCG5,COL1A1,ALDH1A2,IGF1R,CCL2,PLEC,CXCL10,PTGS2,SPP1"
GO: Biological Process	negative regulation of cell differentiation	6.72E-04	8.06E-03	27	520	"ABCA1,PPARG,FGF13,SEMA3F,LDB2,IL4R,FRZB,MBNL3,TGFB2,KLF10,JAK3,BCL6,ITGB3,ITGAV,BMP4,BMP2,FZD7,DYNLT1,FSTL3,MYC,ABCG1,FOXP1,KANK1,SPP1,ZBTB16,STAT3,CD74"
GO: Biological Process	cellular response to stress	6.86E-04	8.21E-03	56	1370	"POLN,CEBPB,SOD3,TRPV4,HMOX1,ADM,IER3,TNFRSF19,CLU,NEK6,F2RL1,FAM129A,BCL2L11,PPP1R15A,IGF1R,FAS,CCL2,MGST1,ZSWIM7,ANGPT4,FOS,MNDA,ATF3,CRY2,KDELR3,ICAM1,DDB2,TGFB2,THBS1,RTN4RL2,TNFAIP3,BCL6,NR4A3,BMP2,SLC52A3,FZD7,CXCL10,MYC,EDN1,PTGS2,ERRFI1,PXDN,BTG2,IGF2BP1,DPEP1,FZD5,EPAS1,GPX3,LCN2,SPP1,ZNF385A,EGR1,FBLN5,C2orf40,CD74,ANKRD1"
GO: Biological Process	pyrimidine ribonucleoside diphosphate metabolic process	6.93E-04	8.22E-03	2	2	"CMPK1,ENTPD4"
GO: Biological Process	UDP metabolic process	6.93E-04	8.22E-03	2	2	"CMPK1,ENTPD4"
GO: Biological Process	negative regulation of mast cell cytokine production	6.93E-04	8.22E-03	2	2	"HMOX1,BCL6"
GO: Biological Process	negative regulation of toll-like receptor 3 signaling pathway	6.93E-04	8.22E-03	2	2	"F2RL1,TNFAIP3"
GO: Biological Process	positive regulation of cell adhesion	7.10E-04	8.38E-03	12	152	"COL8A1,TGM2,TGFB2,THBS1,KDR,GPR56,ITGAV,ITGA6,FSTL3,EPHA1,LGALS1,SPP1"
GO: Biological Process	positive regulation of transport	7.14E-04	8.38E-03	31	632	"FCER1G,ABCA1,NLRP1,SELE,AGER,F2RL1,F2R,ANG,MBL2,IL4R,TLR7,CCL4,CCL2,TGFB2,TGFB3,JAK3,CLEC4M,ITGAV,BMP4,SERPINE1,GSTO1,EDN1,EDNRB,PTGS2,C1QTNF3,HCLS1,ABCG1,IRS2,KANK1,NNAT,ANKRD1"
GO: Biological Process	bone resorption	7.15E-04	8.38E-03	7	57	"CTSS,CTSK,TNFAIP3,ITGB3,ITGAV,RAC2,SPP1"
GO: Biological Process	regulation of chemokine production	7.15E-04	8.38E-03	7	57	"HMOX1,F2RL1,IL4R,IL6R,TLR7,C1QTNF3,CD74"
GO: Biological Process	T cell activation involved in immune response	7.15E-04	8.38E-03	7	57	"F2RL1,IL4R,ICAM1,RELB,JAK3,BCL6,LCP1"
GO: Biological Process	regulation of reactive oxygen species metabolic process	7.21E-04	8.42E-03	8	74	"AGER,IER3,ZC3H12A,F2RL1,PLAU,THBS1,RAC2,FBLN5"
GO: Biological Process	myeloid leukocyte differentiation	7.28E-04	8.49E-03	13	174	"PPARG,TYROBP,PDE2A,FOS,RELB,KLF10,JUNB,ITGB3,BMP4,FSTL3,MYC,HCLS1,SPIB"
GO: Biological Process	regulation of macrophage derived foam cell differentiation	7.41E-04	8.62E-03	5	28	"ABCA1,PPARG,ITGB3,ITGAV,ABCG1"
GO: Biological Process	nuclear import	7.53E-04	8.72E-03	16	243	"F2R,TLR7,PDE2A,CRY2,TGFB2,TGFB3,JAK3,BCL6,BMP4,FZD7,PTGS2,LITAF,C1QTNF3,HCLS1,KANK1,STAT3"
GO: Biological Process	metal ion homeostasis	7.53E-04	8.72E-03	26	497	"CD52,TRPV4,FKBP1B,HMOX1,ADM,MT1H,AGER,F2RL1,F2R,CP,FZD2,CCL2,TGM2,TGFB2,SFXN3,KDR,JAK3,ITGAV,DIAPH1,GSTO1,MYC,EDN1,EDNRB,SLC25A27,LCN2,CXCL1"
GO: Biological Process	response to alkaloid	7.56E-04	8.73E-03	10	112	"PPARG,CHRNB1,HMOX1,ICAM1,GHR,GNAL,MYC,EDN1,NGF,EGR1"
GO: Biological Process	negative regulation of neuron projection development	7.61E-04	8.73E-03	6	42	"TRPV4,PMP22,IL15RA,KANK1,LGALS1,SPP1"
GO: Biological Process	regulation of multicellular organismal metabolic process	7.61E-04	8.73E-03	6	42	"AGER,F2R,IL6R,TGFB3,BMP4,ARRDC3"
GO: Biological Process	negative regulation of coagulation	7.61E-04	8.73E-03	6	42	"PLAT,PLAU,THBS1,THBD,SERPINE1,EDN1"
GO: Biological Process	cellular component disassembly	7.64E-04	8.75E-03	23	418	"DRAM1,FGF13,TRPV4,COL1A1,NEK6,F2RL1,IRAK3,COL14A1,COL12A1,COL5A1,COL8A1,COL3A1,PLEK,CTSK,RPL29,PLEC,RPS20,RPS27,MMP3,TIMP1,COL18A1,BMX,CAPG"
GO: Biological Process	embryonic morphogenesis	7.70E-04	8.79E-03	28	552	"FBN2,HOXB6,HOXD10,ADM,ALDH1A2,BCL2L11,FRZB,SOCS3,FZD2,CYP26B1,HSPG2,RDH10,TGIF1,TGFB2,TGFB3,TNFAIP3,NR4A3,BMP4,FZD7,MYC,EDN1,ECE1,NAGLU,RUNX2,FZD5,SULF1,ZBTB16,AFF3"
GO: Biological Process	divalent inorganic cation homeostasis	7.81E-04	8.90E-03	21	367	"CD52,TRPV4,FKBP1B,ADM,MT1H,AGER,F2RL1,F2R,FZD2,CCL2,TGM2,TGFB2,KDR,JAK3,ITGAV,DIAPH1,GSTO1,EDN1,EDNRB,SLC25A27,CXCL1"
GO: Biological Process	positive regulation of smooth muscle cell proliferation	7.95E-04	9.04E-03	7	58	"HMOX1,AGER,IL6R,TGM2,BMP4,EDN1,PTGS2"
GO: Biological Process	ovulation cycle	8.10E-04	9.19E-03	10	113	"SGPL1,ANG,ICAM1,TGFB2,TGFB3,KDR,BMP4,PAM,CMPK1,LFNG"
GO: Biological Process	regulation of intracellular transport	8.37E-04	9.46E-03	21	369	"FCER1G,FKBP1B,HMOX1,IER3,F2R,BCL2L11,TLR7,PDE2A,TGFB2,TGFB3,TNNT2,DIAPH1,BMP4,FZD7,GSTO1,PTGS2,LITAF,C1QTNF3,HCLS1,LCP1,KANK1"
GO: Biological Process	gonad development	8.38E-04	9.46E-03	15	222	"SGPL1,ANG,BCL2L11,FRZB,FZD2,MGST1,RDH10,ICAM1,KDR,ITGAV,BMP4,FZD7,FSTL3,FZD5,LFNG"
GO: Biological Process	regulation of establishment of protein localization	8.42E-04	9.48E-03	23	421	"NLRP1,F2RL1,F2R,ANG,BCL2L11,IL4R,TLR7,PDE2A,TGFB2,TGFB3,RHBDF2,LRRC32,CLEC4M,BMP4,FZD7,PAM,PTGS2,LITAF,C1QTNF3,HCLS1,LCP1,KANK1,ANKRD1"
GO: Biological Process	gland development	8.47E-04	9.51E-03	18	294	"HOXB9,CDO1,CEBPB,ALDH1A2,BCL2L11,UMPS,FRZB,IGF1R,TGM2,TGFB2,TGFB3,BMP4,BMP2,B4GALT1,FSTL3,LY6E,IRS2,SULF1"
GO: Biological Process	regulation of cardiac muscle cell differentiation	8.63E-04	9.67E-03	4	17	"COL14A1,BMP4,BMP2,FOXP1"
GO: Biological Process	peptide cross-linking	8.76E-04	9.76E-03	5	29	"COL3A1,FN1,TGM2,DCN,THBS1"
GO: Biological Process	negative regulation of carbohydrate metabolic process	8.76E-04	9.76E-03	5	29	"IER3,PLEK,ACER2,C1QTNF3,STAT3"
GO: Biological Process	negative regulation of cytokine-mediated signaling pathway	8.76E-04	9.76E-03	5	29	"PPARG,F2RL1,IRAK3,NLRC5,PXDN"
GO: Biological Process	positive regulation of endothelial cell proliferation	8.82E-04	9.80E-03	7	59	"NR4A1,ANG,CCL2,KDR,ITGB3,BMP4,BMP2"
GO: Biological Process	protein import	8.95E-04	9.92E-03	17	271	"F2R,GPIHBP1,TLR7,PDE2A,CRY2,TGFB2,TGFB3,JAK3,BCL6,BMP4,FZD7,PTGS2,LITAF,C1QTNF3,HCLS1,KANK1,STAT3"
GO: Biological Process	cAMP metabolic process	9.03E-04	9.99E-03	11	135	"ABCA1,ADM,PDE2A,PDE4B,GNAL,RAMP2,EDN1,EDNRB,ECE1,AKAP12,PDE7B"
GO: Biological Process	calcium ion homeostasis	9.13E-04	1.01E-02	20	346	"CD52,TRPV4,FKBP1B,ADM,AGER,F2RL1,F2R,FZD2,CCL2,TGM2,TGFB2,KDR,JAK3,ITGAV,DIAPH1,GSTO1,EDN1,EDNRB,SLC25A27,CXCL1"
GO: Biological Process	low-density lipoprotein particle receptor biosynthetic process	9.23E-04	1.01E-02	3	8	"PPARG,ITGB3,ITGAV"
GO: Biological Process	negative regulation of multicellular organismal metabolic process	9.23E-04	1.01E-02	3	8	"AGER,IL6R,ARRDC3"
GO: Biological Process	renal system development	9.32E-04	1.02E-02	17	272	"ACTA2,SGPL1,ALDH1A2,BCL2L11,PECAM1,CTSH,RDH10,DCN,FAT4,BMP4,BMP2,KLF15,FSTL3,MYC,SULF1,ZBTB16,EGR1"
GO: Biological Process	cytosolic calcium ion homeostasis	9.35E-04	1.02E-02	16	248	"CD52,TRPV4,FKBP1B,ADM,F2RL1,F2R,FZD2,TGM2,TGFB2,JAK3,ITGAV,DIAPH1,GSTO1,EDN1,EDNRB,CXCL1"
GO: Biological Process	regulation of lipid transport	9.39E-04	1.03E-02	8	77	"ABCA1,PPARG,ABCG5,THBS1,ITGB3,ITGAV,ABCG1,IRS2"
GO: Biological Process	regulation of response to cytokine stimulus	9.70E-04	1.06E-02	9	96	"PPARG,F2RL1,IRAK3,IFNGR1,SOCS3,NLRC5,EDN1,PXDN,CD74"
GO: Biological Process	anatomical structure homeostasis	9.75E-04	1.06E-02	16	249	"GPR116,F2R,LDB2,COL14A1,CORO1A,CTSS,CTSK,CTSH,KDR,TNFAIP3,ITGB3,ITGAV,MYC,EPAS1,RAC2,SPP1"
GO: Biological Process	myeloid leukocyte mediated immunity	9.76E-04	1.06E-02	7	60	"FCER1G,HMOX1,CPLX2,F2RL1,ANXA3,IL6R,PRAM1"
GO: Biological Process	monocarboxylic acid metabolic process	9.77E-04	1.06E-02	25	479	"SLC27A3,PPARG,ACSF2,PRKAR2B,FABP4,ALDH1A2,ALOX5AP,PGD,DEGS2,CYP39A1,CYP26B1,ANKRD23,PTPLA,RDH10,DCN,GHR,CYP4V2,CYP1B1,PAM,EDN1,PTGS2,DPEP1,IRS2,EHHADH,CD74"
GO: Biological Process	positive regulation of protein phosphorylation	9.93E-04	1.07E-02	31	645	"FGF13,GDF6,AGER,PRKAR2B,FAM129A,F2R,ANG,IL6R,PECAM1,CCL2,ANGPT4,ATF3,PIM1,KDELR3,ICAM1,TGFB2,TGFB3,THBS1,KDR,GHR,ITGB3,BMP4,BMP2,EDN1,EDNRB,HCLS1,FZD5,CD4,SPN,NGF,CD74"
GO: Biological Process	growth	1.01E-03	1.09E-02	40	906	"PPARG,FGF13,CDKN2C,GDF6,ADM,SEMA3F,MT1H,SGPL1,WISP1,MBL2,BCL2L11,IL6R,COL14A1,FRZB,SOCS3,IGFBP3,IRF8,TNFRSF12A,PLAU,RPL29,RDH10,TGFB2,TGFB3,THBS1,GHR,RERG,BCL6,BMP4,BMP2,FZD7,EDN1,PTGS2,LY6E,FOXP1,ENO3,EMP1,SPP1,NGF,FBLN5,STAT3"
GO: Biological Process	bone remodeling	1.02E-03	1.10E-02	8	78	"CTSS,CTSK,TGFB3,TNFAIP3,ITGB3,ITGAV,RAC2,SPP1"
GO: Biological Process	positive regulation of catalytic activity	1.03E-03	1.10E-02	45	1056	"PERP,PPARG,DOCK4,FGF13,NLRP1,SELE,PRKAR2B,ELMOD1,F2R,GPIHBP1,ANG,BCL2L11,IL6R,IGFBP3,FAS,CCL2,FN1,ANGPT4,PLEK,CTSH,ATF3,PIM1,KDELR3,ICAM1,TGFB2,TGFB3,THBS1,GHR,TNNT2,GNAL,GM2A,ITGB3,BMP4,BMP2,MYC,EDN1,ACER2,ARRDC3,ERRFI1,FZD5,EPHA1,CD4,CXCL1,NGF,CD74"
GO: Biological Process	regulation of collagen biosynthetic process	1.03E-03	1.10E-02	5	30	"AGER,F2R,IL6R,TGFB3,BMP4"
GO: Biological Process	response to ketone	1.05E-03	1.11E-02	9	97	"CCL2,FOS,TGFB2,TGFB3,THBS1,JUNB,BMP4,RAMP2,EDN1"
GO: Biological Process	smooth muscle contraction	1.05E-03	1.11E-02	9	97	"ACTA2,FKBP1B,CNN1,F2R,PDE4B,EDN1,EDNRB,PTGS2,SULF1"
GO: Biological Process	lipid homeostasis	1.05E-03	1.11E-02	9	97	"ABCA1,PPARG,ABCG5,FABP4,GPIHBP1,SLC25A27,C1QTNF3,ABCG1,IRS2"
GO: Biological Process	actin filament polymerization	1.06E-03	1.13E-02	10	117	"WAS,ANG,PECAM1,CORO1A,ICAM1,DIAPH1,CAPG,HCLS1,KANK1,ELN"
GO: Biological Process	reproductive structure development	1.07E-03	1.13E-02	18	300	"SGPL1,ANG,BCL2L11,FRZB,IGF1R,FZD2,MGST1,RDH10,ICAM1,GJB2,KDR,ITGAV,BMP4,FZD7,FSTL3,FZD5,LFNG,SULF1"
GO: Biological Process	lymphocyte homeostasis	1.08E-03	1.14E-02	7	61	"BCL2L11,CORO1A,FAS,TGFB2,TNFAIP3,JAK3,CD74"
GO: Biological Process	regulation of receptor biosynthetic process	1.09E-03	1.15E-02	4	18	"PPARG,ITGB3,ITGAV,EDN1"
GO: Biological Process	leukocyte degranulation	1.11E-03	1.16E-02	6	45	"FCER1G,HMOX1,CPLX2,F2RL1,ANXA3,PRAM1"
GO: Biological Process	bone morphogenesis	1.11E-03	1.17E-02	8	79	"COL1A1,CYP26B1,HSPG2,TGFB3,THBS1,GHR,BMP4,RUNX2"
GO: Biological Process	integrin-mediated signaling pathway	1.12E-03	1.18E-02	9	98	"FCER1G,COL3A1,TYROBP,PLEK,ADAM22,PRAM1,ITGB3,ITGAV,ITGA6"
GO: Biological Process	activation of cysteine-type endopeptidase activity	1.12E-03	1.18E-02	9	98	"PERP,PPARG,NLRP1,F2R,BCL2L11,FAS,CTSH,MYC,ACER2"
GO: Biological Process	mammary gland development	1.15E-03	1.20E-02	11	139	"HOXB9,CDO1,CEBPB,BCL2L11,UMPS,FRZB,IGF1R,TGFB3,BMP4,B4GALT1,IRS2"
GO: Biological Process	mesenchymal cell development	1.15E-03	1.20E-02	11	139	"SEMA3F,AGER,COL1A1,ALDH1A2,RDH10,TGFB2,TGFB3,BMP2,EDN1,EDNRB,LOXL2"
GO: Biological Process	development of primary sexual characteristics	1.15E-03	1.20E-02	16	253	"SGPL1,ANG,BCL2L11,FRZB,FZD2,MGST1,RDH10,ICAM1,GJB2,KDR,ITGAV,BMP4,FZD7,FSTL3,FZD5,LFNG"
GO: Biological Process	regulation of cell morphogenesis	1.16E-03	1.21E-02	20	353	"FGF13,SEMA3F,AGER,COL1A1,FBLIM1,CORO1A,CCL2,TNFRSF12A,FN1,ICAM1,TGFB2,TGFB3,KDR,SSH3,DIAPH1,BMP2,KANK1,PDLIM5,SPP1,NGF"
GO: Biological Process	cellular chemical homeostasis	1.19E-03	1.22E-02	28	568	"CD52,TRPV4,FKBP1B,HMOX1,ADM,MT1H,F2RL1,F2R,CP,FZD2,CCL2,ICAM1,TGM2,CLN6,TGFB2,HMGN3,JAK3,ITGAV,DIAPH1,GSTO1,MYC,EDN1,EDNRB,SLC25A27,C1QTNF3,LGALS1,LCN2,CXCL1"
GO: Biological Process	chemokine production	1.19E-03	1.22E-02	7	62	"HMOX1,F2RL1,IL4R,IL6R,TLR7,C1QTNF3,CD74"
GO: Biological Process	cell-cell adhesion	1.20E-03	1.22E-02	24	459	"PERP,SELE,CLDN1,FBLIM1,COL14A1,PTPRU,PLEK,ICAM1,TGFB2,FAT4,TNFAIP3,CYP1B1,CLEC4M,ITGB3,BMP2,ITGA6,FSTL3,PCDH7,CLDN15,PCDHB15,LGALS1,SPN,CDH11,CDH5"
GO: Biological Process	Rho protein signal transduction	1.20E-03	1.22E-02	15	230	"ABCA1,DOCK4,CTNNAL1,F2RL1,F2R,COL3A1,PECAM1,KCTD13,ICAM1,GPR56,BCL6,DYNLT1,ERRFI1,EPHA1,KANK1"
GO: Biological Process	growth hormone receptor signaling pathway	1.20E-03	1.22E-02	5	31	"SOCS3,GHR,JAK3,IRS2,STAT3"
GO: Biological Process	macrophage derived foam cell differentiation	1.20E-03	1.22E-02	5	31	"ABCA1,PPARG,ITGB3,ITGAV,ABCG1"
GO: Biological Process	foam cell differentiation	1.20E-03	1.22E-02	5	31	"ABCA1,PPARG,ITGB3,ITGAV,ABCG1"
GO: Biological Process	negative regulation of lymphocyte apoptotic process	1.20E-03	1.22E-02	5	31	"JAK3,BCL6,BMP4,IRS2,CD74"
GO: Biological Process	odontogenesis of dentin-containing tooth	1.21E-03	1.23E-02	8	80	"PERP,ADM,BCL2L11,FAM20A,BMP4,BMP2,ITGA6,RUNX2"
GO: Biological Process	cartilage development	1.22E-03	1.24E-02	13	184	"COL1A1,FRZB,HSPG2,TGFB2,THBS1,GHR,BMP4,BMP2,EDN1,LOXL2,RUNX2,SULF1,ZBTB16"
GO: Biological Process	reproductive system development	1.24E-03	1.25E-02	18	304	"SGPL1,ANG,BCL2L11,FRZB,IGF1R,FZD2,MGST1,RDH10,ICAM1,GJB2,KDR,ITGAV,BMP4,FZD7,FSTL3,FZD5,LFNG,SULF1"
GO: Biological Process	fat cell differentiation	1.24E-03	1.25E-02	12	162	"PPARG,GPR116,CEBPB,FABP4,ZC3H12A,FRZB,BMP2,ITGA6,PTGS2,C1QTNF3,ZNF385A,ZBTB16"
GO: Biological Process	cation homeostasis	1.27E-03	1.29E-02	27	543	"CD52,TRPV4,FKBP1B,HMOX1,ADM,MT1H,AGER,F2RL1,F2R,CP,FZD2,CCL2,TGM2,CLN6,TGFB2,SFXN3,KDR,JAK3,ITGAV,DIAPH1,GSTO1,MYC,EDN1,EDNRB,SLC25A27,LCN2,CXCL1"
GO: Biological Process	lung development	1.28E-03	1.29E-02	13	185	"ALDH1A2,MAN2A1,CTSH,WWP1,RDH10,TGFB3,KDR,BMP4,FSTL3,ERRFI1,LOX,EPAS1,FOXP1"
GO: Biological Process	positive regulation of intracellular protein kinase cascade	1.31E-03	1.31E-02	27	544	"HMOX1,TNFRSF19,NEK6,F2RL1,F2R,IL6R,IGF1R,IGFBP3,PECAM1,TGM2,TGFB2,TGFB3,THBS1,KDR,GHR,ITGAV,BMP4,BMP2,FZD7,EDN1,LITAF,C1QTNF3,HCLS1,AKAP12,FZD5,LGALS1,CD74"
GO: Biological Process	response to extracellular stimulus	1.32E-03	1.32E-02	19	331	"PPARG,FKBP1B,HMOX1,ADM,ABCG5,COL1A1,ALDH1A2,IGF1R,CCL2,FOS,PLEC,ICAM1,GHR,ITGA6,CXCL10,PTGS2,LCN2,SPP1,EGR1"
GO: Biological Process	regulation of B cell apoptotic process	1.35E-03	1.34E-02	4	19	"BCL6,MYC,IRS2,CD74"
GO: Biological Process	positive regulation of vasculogenesis	1.36E-03	1.34E-02	3	9	"ADM,KDR,RAMP2"
GO: Biological Process	cGMP-mediated signaling	1.36E-03	1.34E-02	3	9	"PDE2A,THBS1,EDNRB"
GO: Biological Process	negative regulation of T-helper cell differentiation	1.36E-03	1.34E-02	3	9	"IL4R,JAK3,BCL6"
GO: Biological Process	positive regulation of osteoblast proliferation	1.36E-03	1.34E-02	3	9	"ITGB3,ITGAV,BMP2"
GO: Biological Process	branching involved in labyrinthine layer morphogenesis	1.36E-03	1.34E-02	3	9	"ADM,SOCS3,FZD5"
GO: Biological Process	"negative regulation of CD4-positive, alpha-beta T cell differentiation"	1.36E-03	1.34E-02	3	9	"IL4R,JAK3,BCL6"
GO: Biological Process	stem cell differentiation	1.38E-03	1.36E-02	18	307	"SEMA3F,AGER,COL1A1,ALDH1A2,LDB2,FRZB,RDH10,TGFB2,TGFB3,KLF10,BMP4,BMP2,FZD7,EDN1,EDNRB,LOXL2,RUNX2,STAT3"
GO: Biological Process	regulation of collagen metabolic process	1.39E-03	1.37E-02	5	32	"AGER,F2R,IL6R,TGFB3,BMP4"
GO: Biological Process	cellular response to growth hormone stimulus	1.39E-03	1.37E-02	5	32	"SOCS3,GHR,JAK3,IRS2,STAT3"
GO: Biological Process	second-messenger-mediated signaling	1.41E-03	1.38E-02	13	187	"FKBP1B,ADM,SELE,MT1H,CCL4,PDE2A,PLEK,THBS1,KDR,GSTO1,EDN1,EDNRB,CD4"
GO: Biological Process	cellular response to mechanical stimulus	1.44E-03	1.41E-02	7	64	"COL1A1,TLR7,FAS,PDE2A,PTGS2,EGR1,ANKRD1"
GO: Biological Process	limb development	1.45E-03	1.42E-02	12	165	"FBN2,HOXD10,ALDH1A2,BCL2L11,CYP26B1,RDH10,BMP4,PAM,ECE1,RUNX2,ZBTB16,AFF3"
GO: Biological Process	appendage development	1.45E-03	1.42E-02	12	165	"FBN2,HOXD10,ALDH1A2,BCL2L11,CYP26B1,RDH10,BMP4,PAM,ECE1,RUNX2,ZBTB16,AFF3"
GO: Biological Process	respiratory tube development	1.48E-03	1.44E-02	13	188	"ALDH1A2,MAN2A1,CTSH,WWP1,RDH10,TGFB3,KDR,BMP4,FSTL3,ERRFI1,LOX,EPAS1,FOXP1"
GO: Biological Process	reproductive process	1.50E-03	1.46E-02	46	1107	"CDO1,ADM,SGPL1,ANG,BCL2L11,IL4R,UMPS,FRZB,IGF1R,FZD2,CCL2,CYP26B1,MGST1,MAFF,PLAT,FOS,PLAU,CTSH,RPL29,RDH10,ICAM1,TGFB2,TGFB3,THBD,TIMP1,GJB2,KDR,JUNB,BCL6,ITGAV,BMP4,B4GALT1,RAMP2,FZD7,PAM,FSTL3,EDN1,EDNRB,PTGS2,CMPK1,FZD5,LFNG,CD9,SULF1,SPP1,ZBTB16"
GO: Biological Process	cellular response to oxidative stress	1.53E-03	1.48E-02	11	144	"SOD3,HMOX1,MGST1,FOS,TNFAIP3,PXDN,DPEP1,EPAS1,GPX3,LCN2,FBLN5"
GO: Biological Process	regulation of actin filament-based process	1.53E-03	1.48E-02	16	260	"F2RL1,WAS,PECAM1,CORO1A,PDE4B,PLEK,ICAM1,TNNT2,SSH3,PAM,CAPG,EDN1,HCLS1,EPHA1,KANK1,ELN"
GO: Biological Process	regulation of striated muscle cell differentiation	1.54E-03	1.48E-02	8	83	"COL14A1,IGFBP3,CYP26B1,MBNL3,BMP4,BMP2,EDN1,FOXP1"
GO: Biological Process	sex differentiation	1.55E-03	1.49E-02	17	285	"SGPL1,ANG,BCL2L11,FRZB,FZD2,MGST1,RDH10,ICAM1,GJB2,KDR,ITGAV,BMP4,B4GALT1,FZD7,FSTL3,FZD5,LFNG"
GO: Biological Process	response to temperature stimulus	1.55E-03	1.49E-02	10	123	"PPARG,TRPV4,ADM,CIRBP,CCL2,FOS,THBS1,RBM3,SLC52A3,CXCL10"
GO: Biological Process	positive regulation of apoptotic signaling pathway	1.55E-03	1.49E-02	10	123	"PLEKHF1,CLU,BCL2L11,FAS,TNFRSF12A,CTSH,TGFB2,THBS1,JAK3,MYC"
GO: Biological Process	smooth muscle cell migration	1.56E-03	1.49E-02	6	48	"AGER,IGFBP3,PLAT,PLAU,ITGB3,SERPINE1"
GO: Biological Process	macrophage activation	1.56E-03	1.49E-02	6	48	"ZC3H12A,IL4R,TLR7,TYROBP,THBS1,CD74"
GO: Biological Process	positive regulation of fibroblast proliferation	1.56E-03	1.49E-02	6	48	"AGER,S100A6,FOSL2,TGIF1,MYC,CD74"
GO: Biological Process	cell-substrate junction assembly	1.57E-03	1.50E-02	7	65	"FN1,PLEC,THBS1,KDR,ITGB3,ITGAV,ITGA6"
GO: Biological Process	developmental process involved in reproduction	1.58E-03	1.51E-02	25	496	"SGPL1,ANG,BCL2L11,FRZB,IGF1R,FZD2,MGST1,RDH10,ICAM1,TGFB2,TGFB3,GJB2,KDR,JUNB,ITGAV,BMP4,B4GALT1,FZD7,FSTL3,PTGS2,FZD5,LFNG,SULF1,SPP1,ZBTB16"
GO: Biological Process	cellular hormone metabolic process	1.60E-03	1.52E-02	9	103	"ADM,SGPL1,ALDH1A2,CYP26B1,RDH10,CYP1B1,BMP2,STARD5,ECE1"
GO: Biological Process	ion homeostasis	1.61E-03	1.52E-02	29	608	"ABCA1,CD52,TRPV4,FKBP1B,HMOX1,ADM,MT1H,AGER,F2RL1,F2R,CP,FZD2,CCL2,TGM2,CLN6,TGFB2,SFXN3,KDR,JAK3,ITGAV,DIAPH1,GSTO1,MYC,EDN1,EDNRB,SLC25A27,ABCG1,LCN2,CXCL1"
GO: Biological Process	negative regulation of response to cytokine stimulus	1.61E-03	1.52E-02	5	33	"PPARG,F2RL1,IRAK3,NLRC5,PXDN"
GO: Biological Process	regulation of granulocyte chemotaxis	1.61E-03	1.52E-02	5	33	"SELL,CCL2,THBS1,EDN1,CD74"
GO: Biological Process	regulation of blood vessel size	1.62E-03	1.52E-02	11	145	"ACTA2,HMOX1,ADM,ADRA1D,F2RL1,F2R,ICAM1,EDN1,EDNRB,ECE1,PTGS2"
GO: Biological Process	fatty acid metabolic process	1.62E-03	1.52E-02	19	337	"SLC27A3,PPARG,ACSF2,PRKAR2B,FABP4,ALOX5AP,DEGS2,ANKRD23,PTPLA,GHR,CYP4V2,CYP1B1,PAM,EDN1,PTGS2,DPEP1,IRS2,EHHADH,CD74"
GO: Biological Process	cellular metal ion homeostasis	1.65E-03	1.54E-02	23	443	"CD52,TRPV4,FKBP1B,HMOX1,ADM,MT1H,F2RL1,F2R,CP,FZD2,CCL2,TGM2,TGFB2,JAK3,ITGAV,DIAPH1,GSTO1,MYC,EDN1,EDNRB,SLC25A27,LCN2,CXCL1"
GO: Biological Process	positive regulation of blood coagulation	1.65E-03	1.54E-02	4	20	"F2R,THBS1,THBD,SERPINE1"
GO: Biological Process	positive regulation of hemostasis	1.65E-03	1.54E-02	4	20	"F2R,THBS1,THBD,SERPINE1"
GO: Biological Process	glomerulus vasculature development	1.65E-03	1.54E-02	4	20	"ACTA2,PECAM1,BMP4,EGR1"
GO: Biological Process	protein homooligomerization	1.66E-03	1.54E-02	16	262	"HMOX1,CLU,ALOX5AP,MBL2,BCL2L11,FAS,MGST1,KCTD12,DCTPP1,KCTD13,TGM2,KCTD9,PAM,C1QTNF7,GPX3,LCN2"
GO: Biological Process	response to amino acid	1.66E-03	1.54E-02	8	84	"CDO1,CEBPB,COL1A1,COL3A1,CCL2,MMP3,ICAM1,EDN1"
GO: Biological Process	morphogenesis of a branching epithelium	1.68E-03	1.55E-02	14	214	"ADM,SOCS3,CTSH,RDH10,TGM2,FAT4,KDR,BMP4,BMP2,B4GALT1,MYC,EDN1,FZD5,SULF1"
GO: Biological Process	female pregnancy	1.69E-03	1.57E-02	12	168	"ADM,UMPS,FOS,RPL29,TGFB3,THBD,TIMP1,JUNB,RAMP2,PAM,PTGS2,SPP1"
GO: Biological Process	regulation of tube size	1.71E-03	1.58E-02	11	146	"ACTA2,HMOX1,ADM,ADRA1D,F2RL1,F2R,ICAM1,EDN1,EDNRB,ECE1,PTGS2"
GO: Biological Process	vascular endothelial growth factor receptor signaling pathway	1.74E-03	1.60E-02	6	49	"FIGF,CCL2,KDR,ITGB3,BMP4,SULF1"
GO: Biological Process	urogenital system development	1.77E-03	1.63E-02	18	314	"ACTA2,SGPL1,ALDH1A2,BCL2L11,IGF1R,PECAM1,CTSH,RDH10,DCN,FAT4,BMP4,BMP2,KLF15,FSTL3,MYC,SULF1,ZBTB16,EGR1"
GO: Biological Process	regulation of cellular response to growth factor stimulus	1.78E-03	1.64E-02	12	169	"FBN2,FIGF,PPP1R15A,TGFB3,THBS1,KDR,PMEPA1,ITGB3,BMP4,RUNX2,SULF1,NGF"
GO: Biological Process	cellular cation homeostasis	1.79E-03	1.64E-02	24	473	"CD52,TRPV4,FKBP1B,HMOX1,ADM,MT1H,F2RL1,F2R,CP,FZD2,CCL2,TGM2,CLN6,TGFB2,JAK3,ITGAV,DIAPH1,GSTO1,MYC,EDN1,EDNRB,SLC25A27,LCN2,CXCL1"
GO: Biological Process	regulation of cAMP biosynthetic process	1.83E-03	1.67E-02	9	105	"ABCA1,ADM,PDE2A,GNAL,RAMP2,EDN1,EDNRB,ECE1,AKAP12"
GO: Biological Process	extrinsic apoptotic signaling pathway	1.83E-03	1.67E-02	14	216	"HMOX1,BCL2L11,IL6R,FAS,TNFRSF12A,TGFB2,THBS1,TNFAIP3,JAK3,ITGAV,SERPINE1,ITGA6,LCN2,NGF"
GO: Biological Process	regulation of actin cytoskeleton organization	1.83E-03	1.67E-02	14	216	"F2RL1,WAS,PECAM1,CORO1A,PLEK,ICAM1,SSH3,PAM,CAPG,EDN1,HCLS1,EPHA1,KANK1,ELN"
GO: Biological Process	brown fat cell differentiation	1.84E-03	1.68E-02	5	34	"PPARG,CEBPB,FABP4,ITGA6,PTGS2"
GO: Biological Process	regulation of purine nucleotide biosynthetic process	1.86E-03	1.69E-02	10	126	"ABCA1,ADM,PDE2A,GNAL,RAMP2,MYC,EDN1,EDNRB,ECE1,AKAP12"
GO: Biological Process	regulation of blood pressure	1.87E-03	1.70E-02	12	170	"PPARG,ACTA2,HMOX1,ADRA1D,IER3,F2RL1,F2R,RAMP2,EDN1,EDNRB,ECE1,PTGS2"
GO: Biological Process	regulation of vasoconstriction	1.88E-03	1.70E-02	7	67	"ADM,ADRA1D,F2R,ICAM1,EDN1,ECE1,PTGS2"
GO: Biological Process	regulation of cell proliferation involved in kidney development	1.90E-03	1.71E-02	3	10	"BMP4,MYC,EGR1"
GO: Biological Process	thrombin receptor signaling pathway	1.90E-03	1.71E-02	3	10	"F2RL1,F2R,PLEK"
GO: Biological Process	negative regulation of fibrinolysis	1.90E-03	1.71E-02	3	10	"THBS1,THBD,SERPINE1"
GO: Biological Process	regulation of germinal center formation	1.90E-03	1.71E-02	3	10	"HLA-DMA,TNFAIP3,BCL6"
GO: Biological Process	interleukin-6 secretion	1.90E-03	1.71E-02	3	10	"F2RL1,F2R,C1QTNF3"
GO: Biological Process	regulation of nucleotide biosynthetic process	1.97E-03	1.77E-02	10	127	"ABCA1,ADM,PDE2A,GNAL,RAMP2,MYC,EDN1,EDNRB,ECE1,AKAP12"
GO: Biological Process	kidney vasculature development	2.00E-03	1.78E-02	4	21	"ACTA2,PECAM1,BMP4,EGR1"
GO: Biological Process	renal system vasculature development	2.00E-03	1.78E-02	4	21	"ACTA2,PECAM1,BMP4,EGR1"
GO: Biological Process	negative regulation of T-helper 1 cell differentiation	2.04E-03	1.79E-02	2	3	"IL4R,JAK3"
GO: Biological Process	BMP signaling pathway involved in heart induction	2.04E-03	1.79E-02	2	3	"BMP4,BMP2"
GO: Biological Process	negative regulation of low-density lipoprotein particle receptor biosynthetic process	2.04E-03	1.79E-02	2	3	"ITGB3,ITGAV"
GO: Biological Process	neuropeptide catabolic process	2.04E-03	1.79E-02	2	3	"CTSH,ECE1"
GO: Biological Process	regulation of smooth muscle cell-matrix adhesion	2.04E-03	1.79E-02	2	3	"PLAU,SERPINE1"
GO: Biological Process	mesenchymal cell proliferation involved in ureteric bud development	2.04E-03	1.79E-02	2	3	"BMP4,BMP2"
GO: Biological Process	endodermal-mesodermal cell signaling	2.04E-03	1.79E-02	2	3	"BMP4,BMP2"
GO: Biological Process	response to high density lipoprotein particle	2.04E-03	1.79E-02	2	3	"ABCA1,ABCG1"
GO: Biological Process	endodermal-mesodermal cell signaling involved in heart induction	2.04E-03	1.79E-02	2	3	"BMP4,BMP2"
GO: Biological Process	leukotriene production involved in inflammatory response	2.04E-03	1.79E-02	2	3	"ALOX5AP,SERPINE1"
GO: Biological Process	regulation of cell-matrix adhesion	2.05E-03	1.79E-02	7	68	"PLAU,THBS1,KDR,BCL6,SERPINE1,ACER2,EPHA1"
GO: Biological Process	regulation of system process	2.07E-03	1.80E-02	28	590	"FKBP1B,HMOX1,ADM,ADRA1D,ABCG5,CNN1,CPLX2,F2RL1,F2R,COL14A1,CCL2,PDE4B,CTSS,PLAT,ICAM1,TGFB2,TNNT2,GSTO1,EDN1,EDNRB,ECE1,PTGS2,C1QTNF3,CELF2,EPAS1,LAMA2,NGF,EGR1"
GO: Biological Process	tube development	2.07E-03	1.80E-02	25	506	"ADM,ALDH1A2,BCL2L11,MAN2A1,FZD2,CTSH,WWP1,RDH10,TGM2,TGIF1,TGFB3,FAT4,KDR,NR4A3,ITGB3,BMP4,BMP2,B4GALT1,FSTL3,MYC,EDN1,ERRFI1,LOX,EPAS1,FOXP1"
GO: Biological Process	phosphatidylinositol 3-kinase signaling	2.08E-03	1.80E-02	8	87	"PIK3IP1,F2RL1,F2R,IGF1R,TGFB2,KDR,EDN1,HCLS1"
GO: Biological Process	renal system process	2.08E-03	1.80E-02	8	87	"ADRA1D,F2RL1,F2R,FAS,BMP4,EDN1,EDNRB,SULF1"
GO: Biological Process	developmental maturation	2.08E-03	1.80E-02	14	219	"PPARG,ALDH1A2,ANG,TGFB2,FAT4,TIMP1,KDR,BMP2,EDNRB,PTGS2,RUNX2,FZD5,EPAS1,CDH5"
GO: Biological Process	response to retinoic acid	2.08E-03	1.80E-02	9	107	"ABCA1,PPARG,COL1A1,ALDH1A2,CYP26B1,MEST,CTSH,FZD7,ACER2"
GO: Biological Process	circadian rhythm	2.08E-03	1.80E-02	9	107	"PER2,PER3,MTNR1B,PER1,CRY2,DBP,NAGLU,BHLHE40,EGR1"
GO: Biological Process	sulfur compound metabolic process	2.08E-03	1.80E-02	16	268	"CDO1,ARSG,GAL3ST3,MGST1,HSPG2,DCN,GHR,OGN,B4GALT5,B3GNT3,B4GALT1,DPEP1,GPX3,SULF1,GSTA3,ENOPH1"
GO: Biological Process	negative regulation of lymphocyte differentiation	2.10E-03	1.81E-02	5	35	"IL4R,JAK3,BCL6,BMP4,CD74"
GO: Biological Process	stem cell development	2.14E-03	1.83E-02	15	244	"SEMA3F,AGER,COL1A1,ALDH1A2,LDB2,RDH10,TGFB2,TGFB3,KLF10,BMP2,FZD7,EDN1,EDNRB,LOXL2,STAT3"
GO: Biological Process	endochondral bone morphogenesis	2.14E-03	1.83E-02	6	51	"COL1A1,HSPG2,THBS1,GHR,BMP4,RUNX2"
GO: Biological Process	positive chemotaxis	2.14E-03	1.83E-02	6	51	"FIGF,AGER,F2RL1,CORO1A,KDR,BMP4"
GO: Biological Process	cell adhesion mediated by integrin	2.14E-03	1.83E-02	6	51	"PLAU,ICAM1,TGFB2,SERPINE1,ITGA6,ACER2"
GO: Biological Process	antigen processing and presentation	2.17E-03	1.85E-02	14	220	"FCER1G,HLA-DQA1,HLA-B,HLA-DMA,CTSS,CTSH,ICAM1,RELB,IFI30,THBS1,CYBB,CLEC4M,ITGAV,CD74"
GO: Biological Process	positive regulation of immune effector process	2.21E-03	1.89E-02	10	129	"FCER1G,HMOX1,F2RL1,HLA-B,MBL2,IL4R,CCL2,FOXP1,LAG3,CD74"
GO: Biological Process	appendage morphogenesis	2.23E-03	1.89E-02	11	151	"FBN2,HOXD10,ALDH1A2,BCL2L11,CYP26B1,RDH10,BMP4,ECE1,RUNX2,ZBTB16,AFF3"
GO: Biological Process	limb morphogenesis	2.23E-03	1.89E-02	11	151	"FBN2,HOXD10,ALDH1A2,BCL2L11,CYP26B1,RDH10,BMP4,ECE1,RUNX2,ZBTB16,AFF3"
GO: Biological Process	regulation of intracellular protein kinase cascade	2.26E-03	1.91E-02	35	797	"HMOX1,TNFRSF19,NEK6,F2RL1,F2R,IRAK3,IL6R,UCHL1,TLR7,IGF1R,IGFBP3,PECAM1,TGM2,TGFB2,TGFB3,THBS1,KDR,GHR,TNFAIP3,ITGAV,BMP4,BMP2,FZD7,MYC,EDN1,ECE1,PTGS2,LITAF,C1QTNF3,HCLS1,AKAP12,FZD5,LGALS1,NGF,CD74"
GO: Biological Process	lymphocyte mediated immunity	2.26E-03	1.91E-02	14	221	"FCER1G,CLU,HLA-B,HLA-DMA,MBL2,FAS,CTSH,ICAM1,BCL6,C1R,SWAP70,SPN,LAG3,CD74"
GO: Biological Process	positive regulation of protein metabolic process	2.28E-03	1.93E-02	42	1008	"PERP,FGF13,GDF6,HMOX1,AGER,PRKAR2B,CIRBP,IER3,CLU,FAM129A,F2R,ANG,MBL2,IL6R,TLR7,PECAM1,CCL2,ANGPT4,ATF3,PIM1,KDELR3,ICAM1,CLN6,TGFB2,TGFB3,THBS1,KDR,GHR,TNFAIP3,RBM3,ITGB3,BMP4,BMP2,EDN1,EDNRB,ARRDC3,HCLS1,FZD5,CD4,SPN,NGF,CD74"
GO: Biological Process	cAMP biosynthetic process	2.36E-03	1.99E-02	9	109	"ABCA1,ADM,PDE2A,GNAL,RAMP2,EDN1,EDNRB,ECE1,AKAP12"
GO: Biological Process	mesenchymal cell proliferation	2.37E-03	1.99E-02	6	52	"KDR,BMP4,BMP2,MYC,FOXP1,IRS2"
GO: Biological Process	anatomical structure maturation	2.37E-03	1.99E-02	6	52	"ALDH1A2,TGFB2,FAT4,BMP2,PTGS2,CDH5"
GO: Biological Process	negative regulation of cell-matrix adhesion	2.39E-03	1.99E-02	4	22	"THBS1,BCL6,SERPINE1,ACER2"
GO: Biological Process	thymic T cell selection	2.39E-03	1.99E-02	4	22	"HLA-DMA,FAS,SPN,CD74"
GO: Biological Process	response to protozoan	2.39E-03	1.99E-02	4	22	"IER3,IL4R,IRF8,SPN"
GO: Biological Process	protein homotrimerization	2.39E-03	1.99E-02	4	22	"ALOX5AP,MBL2,MGST1,LCN2"
GO: Biological Process	zymogen activation	2.39E-03	1.99E-02	4	22	"PLAT,CTSH,THBS1,SERPINE1"
GO: Biological Process	axon development	2.41E-03	2.01E-02	27	568	"FGF13,SEMA3F,S100A6,FRZB,UCHL1,COL5A1,IGF1R,COL3A1,FZD2,TYROBP,TNFRSF12A,TGFB2,RTN4RL2,SPON2,SSH3,NR4A3,ITGB3,ITGAV,FZD7,CACNB3,FZD5,FOXP1,LAMA2,RAC2,SPP1,CDH11,NGF"
GO: Biological Process	neuron apoptotic process	2.45E-03	2.04E-02	14	223	"CEBPB,NLRP1,HMOX1,AGER,F2R,BCL2L11,FAS,CCL2,TGFB2,TGFB3,NR4A3,BTG2,NGF,EGR1"
GO: Biological Process	response to estrogen	2.47E-03	2.05E-02	11	153	"PPARG,HMOX1,ALDH1A2,IL4R,TGFB2,TGFB3,GHR,RAMP2,PAM,PTGS2,STAT3"
GO: Biological Process	myeloid cell homeostasis	2.48E-03	2.05E-02	10	131	"FCER1G,HOXB6,HMOX1,BCL2L11,PDE4B,TIMP1,BCL6,BMP4,HCLS1,EPAS1"
GO: Biological Process	positive regulation of hydrolase activity	2.48E-03	2.05E-02	26	541	"PERP,PPARG,DOCK4,NLRP1,SELE,PRKAR2B,ELMOD1,F2R,GPIHBP1,ANG,BCL2L11,FAS,CCL2,FN1,PLEK,CTSH,ATF3,KDELR3,ICAM1,TNNT2,BMP2,MYC,ACER2,ERRFI1,EPHA1,NGF"
GO: Biological Process	cyclic nucleotide metabolic process	2.50E-03	2.06E-02	12	176	"ABCA1,ADM,FZD2,PDE2A,PDE4B,GNAL,RAMP2,EDN1,EDNRB,ECE1,AKAP12,PDE7B"
GO: Biological Process	MAPK cascade	2.50E-03	2.06E-02	28	598	"FGF13,TNFRSF19,F2RL1,F2R,IRAK3,IL6R,UCHL1,IGF1R,IGFBP3,CCL2,FOS,CTSH,TGFB2,TGFB3,THBS1,KDR,GHR,ITGAV,BMP4,BMP2,FZD7,MYC,EDN1,ECE1,C1QTNF3,FZD5,NGF,CD74"
GO: Biological Process	neuron projection morphogenesis	2.52E-03	2.08E-02	29	627	"FGF13,SEMA3F,S100A6,FRZB,UCHL1,COL5A1,IGF1R,COL3A1,FZD2,TYROBP,TNFRSF12A,TGFB2,SPON2,SSH3,NR4A3,ITGB3,ITGAV,FZD7,DYNLT1,CACNB3,NBL1,FZD5,FOXP1,LAMA2,PDLIM5,RAC2,SPP1,CDH11,NGF"
GO: Biological Process	positive regulation of cellular component organization	2.53E-03	2.08E-02	30	656	"FCER1G,TRPV4,SELE,AGER,COL1A1,F2RL1,WAS,GPIHBP1,MBL2,BCL2L11,IGF1R,CORO1A,FAS,CCL2,IRF8,TNFRSF12A,PLEK,ICAM1,TGFB2,TGFB3,KDR,ITGAV,SERPINE1,BMP2,EDN1,HCLS1,EPHA1,LCN2,NGF,ANKRD1"
GO: Biological Process	cellular ion homeostasis	2.54E-03	2.08E-02	24	486	"CD52,TRPV4,FKBP1B,HMOX1,ADM,MT1H,F2RL1,F2R,CP,FZD2,CCL2,TGM2,CLN6,TGFB2,JAK3,ITGAV,DIAPH1,GSTO1,MYC,EDN1,EDNRB,SLC25A27,LCN2,CXCL1"
GO: Biological Process	response to lipoprotein particle	2.56E-03	2.09E-02	3	11	"ABCA1,PPARG,ABCG1"
GO: Biological Process	positive regulation of endothelial cell apoptotic process	2.56E-03	2.09E-02	3	11	"AGER,THBS1,COL18A1"
GO: Biological Process	negative regulation of Rho protein signal transduction	2.56E-03	2.09E-02	3	11	"KCTD13,BCL6,KANK1"
GO: Biological Process	"negative regulation of CD4-positive, alpha-beta T cell activation"	2.56E-03	2.09E-02	3	11	"IL4R,JAK3,BCL6"
GO: Biological Process	cellular response to tumor necrosis factor	2.57E-03	2.09E-02	8	90	"TNFRSF19,F2RL1,FAS,CCL2,ICAM1,EDN1,LCN2,ANKRD1"
GO: Biological Process	regulation of cartilage development	2.61E-03	2.11E-02	6	53	"FRZB,BMP4,BMP2,LOXL2,RUNX2,ZBTB16"
GO: Biological Process	muscle cell migration	2.61E-03	2.11E-02	6	53	"AGER,IGFBP3,PLAT,PLAU,ITGB3,SERPINE1"
GO: Biological Process	regulation of neurogenesis	2.62E-03	2.11E-02	25	515	"PPARG,FGF13,GDF6,TRPV4,PMP22,SEMA3F,MAN2A1,COL3A1,TNFRSF12A,TGIF1,GPR56,SSH3,BMP4,BMP2,DYNLT1,IL15RA,EDNRB,NBL1,KANK1,LGALS1,PDLIM5,SPP1,NGF,STAT3,ANKRD1"
GO: Biological Process	regulation of leukocyte mediated immunity	2.62E-03	2.11E-02	10	132	"FCER1G,HMOX1,F2RL1,HLA-B,ICAM1,JAK3,BCL6,PRAM1,SPN,LAG3"
GO: Biological Process	striated muscle cell development	2.62E-03	2.11E-02	10	132	"CHRNB1,COL14A1,UCHL1,IGFBP3,MBNL3,TNNT2,BMP4,EDN1,FOXP1,ANKRD1"
GO: Biological Process	leukocyte proliferation	2.66E-03	2.14E-02	14	225	"FKBP1B,F2RL1,HLA-DQA1,CORO1A,MNDA,TNFAIP3,JAK3,BCL6,LRRC32,BMP4,IRS2,ELF4,SPN,CD74"
GO: Biological Process	regulation of T cell activation	2.70E-03	2.17E-02	15	250	"HLA-DQA1,HLA-DMA,IL4R,CORO1A,MAP3K8,CCL2,JAK3,BCL6,LRRC32,BMP4,LGALS1,CD4,SPN,LAG3,CD74"
GO: Biological Process	positive regulation of nitrogen compound metabolic process	2.70E-03	2.17E-02	54	1392	"ABCA1,PPARG,HOXB9,CEBPB,GDF6,HOXD10,NR4A1,ADM,COL1A1,F2RL1,F2R,LDB2,ANXA3,IGF1R,FZD2,IRF8,FOS,KCTD13,ICAM1,TGFB3,DBP,HMGN3,GNAL,JAK3,JUNB,NR4A3,BMP4,SERPINE1,BMP2,KLF15,ITGA6,RAMP2,NLRC5,FZD7,TEF,FSTL3,MYC,EDN1,ECE1,PTGS2,BTG2,HCLS1,AKAP12,RUNX2,FZD5,EPAS1,FOXP1,TNFSF8,CREB3L1,ELF4,ZBTB16,EGR1,STAT3,ANKRD1"
GO: Biological Process	pathway-restricted SMAD protein phosphorylation	2.71E-03	2.17E-02	5	37	"GDF6,TGFB2,TGFB3,BMP4,BMP2"
GO: Biological Process	positive regulation of cell morphogenesis involved in differentiation	2.71E-03	2.17E-02	5	37	"AGER,COL1A1,TGFB2,TGFB3,BMP2"
GO: Biological Process	cellular divalent inorganic cation homeostasis	2.73E-03	2.18E-02	19	353	"CD52,TRPV4,FKBP1B,ADM,MT1H,F2RL1,F2R,FZD2,CCL2,TGM2,TGFB2,JAK3,ITGAV,DIAPH1,GSTO1,EDN1,EDNRB,SLC25A27,CXCL1"
GO: Biological Process	morphogenesis of a branching structure	2.77E-03	2.21E-02	14	226	"ADM,SOCS3,CTSH,RDH10,TGM2,FAT4,KDR,BMP4,BMP2,B4GALT1,MYC,EDN1,FZD5,SULF1"
GO: Biological Process	receptor biosynthetic process	2.83E-03	2.25E-02	4	23	"PPARG,ITGB3,ITGAV,EDN1"
GO: Biological Process	positive regulation of coagulation	2.83E-03	2.25E-02	4	23	"F2R,THBS1,THBD,SERPINE1"
GO: Biological Process	response to nutrient levels	2.84E-03	2.25E-02	17	302	"PPARG,FKBP1B,HMOX1,ADM,ABCG5,COL1A1,ALDH1A2,IGF1R,CCL2,PLEC,ICAM1,GHR,CXCL10,PTGS2,LCN2,SPP1,EGR1"
GO: Biological Process	cellular response to reactive oxygen species	2.95E-03	2.34E-02	8	92	"SOD3,FOS,TNFAIP3,PXDN,DPEP1,GPX3,LCN2,FBLN5"
GO: Biological Process	protein polymerization	3.00E-03	2.38E-02	12	180	"FGF13,TRPV4,WAS,ANG,PECAM1,CORO1A,ICAM1,DIAPH1,CAPG,HCLS1,KANK1,ELN"
GO: Biological Process	response to organophosphorus	3.02E-03	2.39E-02	9	113	"CDO1,SELL,COL1A1,PDE2A,PLAT,FOS,JUNB,PTGS2,EGR1"
GO: Biological Process	axonogenesis	3.02E-03	2.39E-02	26	549	"FGF13,SEMA3F,S100A6,FRZB,UCHL1,COL5A1,IGF1R,COL3A1,FZD2,TYROBP,TNFRSF12A,TGFB2,SPON2,SSH3,NR4A3,ITGB3,ITGAV,FZD7,CACNB3,FZD5,FOXP1,LAMA2,RAC2,SPP1,CDH11,NGF"
GO: Biological Process	response to growth hormone	3.05E-03	2.39E-02	5	38	"SOCS3,GHR,JAK3,IRS2,STAT3"
GO: Biological Process	T cell homeostasis	3.05E-03	2.39E-02	5	38	"BCL2L11,CORO1A,FAS,TGFB2,JAK3"
GO: Biological Process	T cell selection	3.05E-03	2.39E-02	5	38	"HLA-DMA,FAS,CD4,SPN,CD74"
GO: Biological Process	response to peptide	3.11E-03	2.44E-02	21	411	"PPARG,CDO1,NLRP1,ADM,COL1A1,PRKAR2B,SOCS3,IGF1R,PLAT,TIMP1,GHR,TNFAIP3,JAK3,JUNB,NR4A3,BTG2,IRS2,KANK1,NGF,EGR1,STAT3"
GO: Biological Process	glomerulus development	3.16E-03	2.46E-02	6	55	"ACTA2,PECAM1,BMP4,KLF15,SULF1,EGR1"
GO: Biological Process	positive regulation of purine nucleotide metabolic process	3.16E-03	2.46E-02	8	93	"ABCA1,ADM,FZD2,GNAL,RAMP2,MYC,ECE1,AKAP12"
GO: Biological Process	activation of cysteine-type endopeptidase activity involved in apoptotic process	3.16E-03	2.46E-02	8	93	"PPARG,NLRP1,F2R,BCL2L11,FAS,CTSH,MYC,ACER2"
GO: Biological Process	signal transduction by phosphorylation	3.23E-03	2.49E-02	28	609	"FGF13,TNFRSF19,F2RL1,F2R,IRAK3,IL6R,UCHL1,IGF1R,IGFBP3,CCL2,FOS,CTSH,TGFB2,TGFB3,THBS1,KDR,GHR,ITGAV,BMP4,BMP2,FZD7,MYC,EDN1,ECE1,C1QTNF3,FZD5,NGF,CD74"
GO: Biological Process	muscle cell differentiation	3.24E-03	2.49E-02	17	306	"CHRNB1,ADM,COL14A1,UCHL1,IGFBP3,CYP26B1,MBNL3,TNNT2,BMP4,BMP2,RAMP2,EDN1,EDNRB,EPAS1,FOXP1,LGALS1,ANKRD1"
GO: Biological Process	oxoacid metabolic process	3.26E-03	2.49E-02	43	1059	"SLC27A3,PPARG,CDO1,ACSF2,PRKAR2B,SGPL1,FABP4,ALDH1A2,ALOX5AP,PGD,DEGS2,CYP39A1,CYP26B1,ANKRD23,CTPS1,PTPLA,MGST1,HSPG2,RDH10,DCN,SLC7A5,GHR,CYP4V2,CYP1B1,BCKDHA,OGN,B4GALT5,B3GNT3,B4GALT1,PAM,GSTO1,EDN1,PTGS2,CMPK1,CARS,DPEP1,IRS2,GPX3,SULF1,GSTA3,EHHADH,ENOPH1,CD74"
GO: Biological Process	regulation of fibroblast proliferation	3.32E-03	2.49E-02	7	74	"AGER,S100A6,FOSL2,TGIF1,IFI30,MYC,CD74"
GO: Biological Process	negative regulation of leukocyte differentiation	3.32E-03	2.49E-02	7	74	"IL4R,JAK3,BCL6,BMP4,FSTL3,MYC,CD74"
GO: Biological Process	negative regulation of immune response	3.32E-03	2.49E-02	7	74	"HLA-B,IRAK3,COL3A1,TGFB2,TNFAIP3,BCL6,SPN"
GO: Biological Process	movement in environment of other organism involved in symbiotic interaction	3.33E-03	2.49E-02	4	24	"WWP1,ITGAV,DYNLT1,CD4"
GO: Biological Process	regulation of interferon-gamma-mediated signaling pathway	3.33E-03	2.49E-02	4	24	"PPARG,IFNGR1,SOCS3,NLRC5"
GO: Biological Process	entry into host	3.33E-03	2.49E-02	4	24	"WWP1,ITGAV,DYNLT1,CD4"
GO: Biological Process	movement in host environment	3.33E-03	2.49E-02	4	24	"WWP1,ITGAV,DYNLT1,CD4"
GO: Biological Process	entry into host cell	3.33E-03	2.49E-02	4	24	"WWP1,ITGAV,DYNLT1,CD4"
GO: Biological Process	entry into other organism involved in symbiotic interaction	3.33E-03	2.49E-02	4	24	"WWP1,ITGAV,DYNLT1,CD4"
GO: Biological Process	cartilage development involved in endochondral bone morphogenesis	3.33E-03	2.49E-02	4	24	"COL1A1,HSPG2,THBS1,GHR"
GO: Biological Process	neutrophil mediated immunity	3.33E-03	2.49E-02	4	24	"F2RL1,ANXA3,IL6R,PRAM1"
GO: Biological Process	apoptotic cell clearance	3.33E-03	2.49E-02	4	24	"CCL2,TGM2,THBS1,ITGAV"
GO: Biological Process	entry into cell of other organism involved in symbiotic interaction	3.33E-03	2.49E-02	4	24	"WWP1,ITGAV,DYNLT1,CD4"
GO: Biological Process	osteoblast proliferation	3.33E-03	2.49E-02	4	24	"JUNB,ITGB3,ITGAV,BMP2"
GO: Biological Process	regulation of leukocyte degranulation	3.33E-03	2.49E-02	4	24	"FCER1G,HMOX1,F2RL1,PRAM1"
GO: Biological Process	peptidyl-tyrosine phosphorylation	3.33E-03	2.49E-02	16	281	"F2R,IL6R,IGF1R,PECAM1,ANGPT4,ICAM1,KDR,GHR,JAK3,ITGB3,BMX,ERRFI1,HCLS1,EPHA1,CD4,CD74"
GO: Biological Process	regulation of apoptotic signaling pathway	3.33E-03	2.49E-02	18	333	"PLEKHF1,HMOX1,IER3,CLU,BCL2L11,FAS,TNFRSF12A,CTSH,TGFB2,THBS1,TNFAIP3,JAK3,ITGAV,SERPINE1,ITGA6,MYC,ZNF385A,CD74"
GO: Biological Process	negative regulation of B cell apoptotic process	3.35E-03	2.49E-02	3	12	"BCL6,IRS2,CD74"
GO: Biological Process	positive regulation of protein depolymerization	3.35E-03	2.49E-02	3	12	"TRPV4,F2RL1,PLEK"
GO: Biological Process	regulation of odontogenesis of dentin-containing tooth	3.35E-03	2.49E-02	3	12	"BMP4,BMP2,RUNX2"
GO: Biological Process	negative regulation of interleukin-12 production	3.35E-03	2.49E-02	3	12	"IRAK3,THBS1,JAK3"
GO: Biological Process	positive regulation of cartilage development	3.35E-03	2.49E-02	3	12	"BMP4,BMP2,ZBTB16"
GO: Biological Process	glomerular mesangium development	3.35E-03	2.49E-02	3	12	"ACTA2,BMP4,EGR1"
GO: Biological Process	negative regulation of vascular permeability	3.35E-03	2.49E-02	3	12	"ADM,PDE2A,RAMP2"
GO: Biological Process	regulation of vasculogenesis	3.35E-03	2.49E-02	3	12	"ADM,KDR,RAMP2"
GO: Biological Process	low-density lipoprotein receptor particle metabolic process	3.35E-03	2.49E-02	3	12	"PPARG,ITGB3,ITGAV"
GO: Biological Process	negative regulation of alpha-beta T cell differentiation	3.35E-03	2.49E-02	3	12	"IL4R,JAK3,BCL6"
GO: Biological Process	negative thymic T cell selection	3.35E-03	2.49E-02	3	12	"FAS,SPN,CD74"
GO: Biological Process	regulation of protein localization	3.37E-03	2.50E-02	24	497	"NLRP1,F2RL1,F2R,ANG,BCL2L11,IL4R,TLR7,PDE2A,TGFB2,TGFB3,RHBDF2,LRRC32,CLEC4M,BMP4,FZD7,PAM,PTGS2,LITAF,C1QTNF3,HCLS1,LCP1,KANK1,NNAT,ANKRD1"
GO: Biological Process	positive regulation of nucleotide metabolic process	3.37E-03	2.50E-02	8	94	"ABCA1,ADM,FZD2,GNAL,RAMP2,MYC,ECE1,AKAP12"
GO: Biological Process	regulation of cAMP metabolic process	3.40E-03	2.52E-02	9	115	"ABCA1,ADM,PDE2A,GNAL,RAMP2,EDN1,EDNRB,ECE1,AKAP12"
GO: Biological Process	positive regulation of reactive oxygen species metabolic process	3.42E-03	2.53E-02	5	39	"AGER,ZC3H12A,F2RL1,PLAU,THBS1"
GO: Biological Process	vesicle-mediated transport	3.43E-03	2.53E-02	44	1093	"FCER1G,ABCA1,SNX33,FIGF,HMOX1,ADM,SELE,CPLX2,ELMOD1,CLU,F2RL1,CD302,WAS,GPIHBP1,MBL2,ANXA3,STAB2,PECAM1,CORO1A,CCL2,IRF8,FN1,PLEK,KDELR3,GULP1,CLEC10A,TGM2,TGFB2,TGFB3,THBS1,TIMP1,CYTH1,GHR,PRAM1,CLEC4M,ITGB3,ITGAV,SERPINE1,B4GALT1,RAMP2,LDLRAD3,RAB3D,RIN1,CD9"
GO: Biological Process	regulation of transmembrane receptor protein serine/threonine kinase signaling pathway	3.43E-03	2.53E-02	12	183	"FBN2,GDF6,PPP1R15A,TGFB3,THBS1,KDR,PMEPA1,BMP4,BMP2,FSTL3,NBL1,SULF1"
GO: Biological Process	cellular calcium ion homeostasis	3.44E-03	2.53E-02	18	334	"CD52,TRPV4,FKBP1B,ADM,F2RL1,F2R,FZD2,CCL2,TGM2,TGFB2,JAK3,ITGAV,DIAPH1,GSTO1,EDN1,EDNRB,SLC25A27,CXCL1"
GO: Biological Process	positive regulation of lymphocyte activation	3.51E-03	2.58E-02	14	232	"HLA-DQA1,HLA-DMA,IL4R,CORO1A,MAP3K8,CCL2,JAK3,BCL6,IL15RA,IRS2,LGALS1,CD4,SPN,CD74"
GO: Biological Process	regulation of protein complex assembly	3.51E-03	2.58E-02	14	232	"CLU,WAS,BCL2L11,FBLIM1,PECAM1,CORO1A,FAS,IRF8,PLEK,ICAM1,CAPG,HCLS1,KANK1,ELN"
GO: Biological Process	peptidyl-tyrosine modification	3.57E-03	2.62E-02	16	283	"F2R,IL6R,IGF1R,PECAM1,ANGPT4,ICAM1,KDR,GHR,JAK3,ITGB3,BMX,ERRFI1,HCLS1,EPHA1,CD4,CD74"
GO: Biological Process	positive regulation of transmembrane receptor protein serine/threonine kinase signaling pathway	3.58E-03	2.62E-02	7	75	"GDF6,TGFB3,THBS1,KDR,BMP4,BMP2,SULF1"
GO: Biological Process	negative regulation of protein modification process	3.60E-03	2.63E-02	20	389	"CDKN2C,ADARB1,AGER,PRKAR2B,FABP4,FAM129A,IRAK3,UCHL1,SOCS3,IGF1R,IGFBP3,PECAM1,TNFAIP3,BMP4,KLF15,SH3BP5,ACER2,ERRFI1,TARBP2,EPHA1"
GO: Biological Process	embryonic skeletal system morphogenesis	3.60E-03	2.63E-02	8	95	"HOXB6,HOXD10,HSPG2,RDH10,TGFB2,TGFB3,BMP4,RUNX2"
GO: Biological Process	respiratory system development	3.73E-03	2.72E-02	13	209	"ALDH1A2,MAN2A1,CTSH,WWP1,RDH10,TGFB3,KDR,BMP4,FSTL3,ERRFI1,LOX,EPAS1,FOXP1"
GO: Biological Process	regulated secretory pathway	3.78E-03	2.75E-02	6	57	"FCER1G,HMOX1,CPLX2,F2RL1,ANXA3,PRAM1"
GO: Biological Process	regulation of cyclic nucleotide metabolic process	3.80E-03	2.76E-02	10	139	"ABCA1,ADM,FZD2,PDE2A,GNAL,RAMP2,EDN1,EDNRB,ECE1,AKAP12"
GO: Biological Process	positive regulation of phagocytosis	3.83E-03	2.77E-02	5	40	"FCER1G,F2RL1,MBL2,CCL2,ITGAV"
GO: Biological Process	forelimb morphogenesis	3.83E-03	2.77E-02	5	40	"HOXD10,ALDH1A2,RDH10,RUNX2,ZBTB16"
GO: Biological Process	regulation of response to interferon-gamma	3.88E-03	2.79E-02	4	25	"PPARG,IFNGR1,SOCS3,NLRC5"
GO: Biological Process	negative regulation of cellular carbohydrate metabolic process	3.88E-03	2.79E-02	4	25	"IER3,PLEK,C1QTNF3,STAT3"
GO: Biological Process	regulation of macrophage activation	3.88E-03	2.79E-02	4	25	"ZC3H12A,IL4R,THBS1,CD74"
GO: Biological Process	vascular endothelial growth factor production	3.88E-03	2.79E-02	4	25	"CCL2,GPR56,PTGS2,SULF1"
GO: Biological Process	response to lithium ion	3.88E-03	2.79E-02	4	25	"PPARG,FABP4,FAS,PTGS2"
GO: Biological Process	cell-cell signaling	3.89E-03	2.79E-02	48	1226	"GJC3,PPARG,CHRNB1,FGF13,SLC38A2,TRPV4,FKBP1B,PMP22,ADM,ADRA1D,PRKAR2B,CPLX2,WISP1,MTNR1B,GPR176,MPZL1,CCL17,FZD2,CCL4,CCL2,CXCL9,PLAT,TGFB2,KLF10,GJB2,GPR56,HMGN3,GNAL,BMP4,BMP2,CXCL10,EDN1,PTGS2,CACNB3,LY6E,C1QTNF3,HILPDA,FZD5,IRS2,TNFSF8,CD33,PDE7B,LAMA2,PDLIM5,ZYX,NGF,NNAT,EGR1"
GO: Biological Process	regulation of vascular wound healing	4.01E-03	2.83E-02	2	4	"TNFAIP3,SERPINE1"
GO: Biological Process	regulation of toll-like receptor 3 signaling pathway	4.01E-03	2.83E-02	2	4	"F2RL1,TNFAIP3"
GO: Biological Process	pyrimidine nucleoside diphosphate metabolic process	4.01E-03	2.83E-02	2	4	"CMPK1,ENTPD4"
GO: Biological Process	regulation of renin secretion into blood stream	4.01E-03	2.83E-02	2	4	"F2RL1,F2R"
GO: Biological Process	bradykinin catabolic process	4.01E-03	2.83E-02	2	4	"CTSH,ECE1"
GO: Biological Process	negative regulation of prostatic bud formation	4.01E-03	2.83E-02	2	4	"BMP4,SULF1"
GO: Biological Process	positive regulation of cell proliferation involved in kidney development	4.01E-03	2.83E-02	2	4	"MYC,EGR1"
GO: Biological Process	positive regulation of ovulation	4.01E-03	2.83E-02	2	4	"PLAT,PLAU"
GO: Biological Process	negative regulation of membrane protein ectodomain proteolysis	4.01E-03	2.83E-02	2	4	"TIMP1,TIMP3"
GO: Biological Process	arachidonic acid metabolite production involved in inflammatory response	4.01E-03	2.83E-02	2	4	"ALOX5AP,SERPINE1"
GO: Biological Process	negative regulation of plasma membrane long-chain fatty acid transport	4.01E-03	2.83E-02	2	4	"THBS1,IRS2"
GO: Biological Process	response to lipid hydroperoxide	4.01E-03	2.83E-02	2	4	"MGST1,GPX3"
GO: Biological Process	vein smooth muscle contraction	4.01E-03	2.83E-02	2	4	"EDN1,EDNRB"
GO: Biological Process	divalent metal ion transport	4.02E-03	2.83E-02	18	339	"TRPV4,FKBP1B,CLCA1,F2R,CORO1A,CCL4,PDE2A,PDE4B,ICAM1,TGFB2,JAK3,ITGAV,DIAPH1,RAMP2,GSTO1,NIPA1,PTGS2,CACNB3"
GO: Biological Process	bone mineralization	4.09E-03	2.88E-02	8	97	"FBN2,TGFB3,KLF10,BMP4,BMP2,PTGS2,CREB3L1,IFITM5"
GO: Biological Process	activation of immune response	4.10E-03	2.88E-02	21	421	"FCER1G,CLU,F2RL1,WAS,HLA-DQA1,MBL2,CFP,LY96,IRAK3,TLR7,PDE4B,CTSS,FOS,CTSK,MNDA,TNFAIP3,LRRC32,C1R,CACNB3,RFTN1,CD4"
GO: Biological Process	positive regulation of osteoblast differentiation	4.13E-03	2.89E-02	6	58	"FBN2,CEBPB,IL6R,BMP4,BMP2,RUNX2"
GO: Biological Process	T cell differentiation in thymus	4.15E-03	2.90E-02	7	77	"HLA-DMA,FAS,BMP4,FZD7,FZD5,SPN,CD74"
GO: Biological Process	fibroblast proliferation	4.15E-03	2.90E-02	7	77	"AGER,S100A6,FOSL2,TGIF1,IFI30,MYC,CD74"
GO: Biological Process	cellular response to organic cyclic compound	4.19E-03	2.92E-02	15	262	"PPARG,NR4A1,CCL2,PDE2A,PDE4B,RBM3,NR4A3,DIAPH1,BMP4,BMP2,PTGS2,TARBP2,LGALS1,EGR1,ANKRD1"
GO: Biological Process	positive regulation of transcription from RNA polymerase II promoter	4.23E-03	2.94E-02	35	829	"PPARG,HOXB9,CEBPB,HOXD10,NR4A1,F2RL1,LDB2,FOS,TGFB3,DBP,HMGN3,JAK3,JUNB,NR4A3,BMP4,SERPINE1,BMP2,KLF15,ITGA6,NLRC5,TEF,FSTL3,MYC,BTG2,HCLS1,RUNX2,FZD5,EPAS1,FOXP1,TNFSF8,CREB3L1,ELF4,EGR1,STAT3,ANKRD1"
GO: Biological Process	heart development	4.24E-03	2.94E-02	22	450	"PPARG,ADM,ALDH1A2,COL14A1,COL5A1,COL3A1,FZD2,HSPG2,TGFB2,FAT4,THBS1,KDR,TNNT2,BMP4,BMP2,RAMP2,PAM,EDN1,ECE1,LY6E,FOXP1,ANKRD1"
GO: Biological Process	organic acid metabolic process	4.26E-03	2.94E-02	43	1075	"SLC27A3,PPARG,CDO1,ACSF2,PRKAR2B,SGPL1,FABP4,ALDH1A2,ALOX5AP,PGD,DEGS2,CYP39A1,CYP26B1,ANKRD23,CTPS1,PTPLA,MGST1,HSPG2,RDH10,DCN,SLC7A5,GHR,CYP4V2,CYP1B1,BCKDHA,OGN,B4GALT5,B3GNT3,B4GALT1,PAM,GSTO1,EDN1,PTGS2,CMPK1,CARS,DPEP1,IRS2,GPX3,SULF1,GSTA3,EHHADH,ENOPH1,CD74"
GO: Biological Process	negative regulation of biosynthetic process	4.27E-03	2.94E-02	46	1169	"PPARG,CEBPB,AGER,CIRBP,PER2,FABP4,ZC3H12A,PER3,ANG,PER1,IL6R,CCL4,PDE2A,IRF8,PLEK,ATF3,CRY2,WWP1,TGIF1,TGFB3,KLF10,JAK3,ZFP57,BCL6,ITGB3,UXT,ITGAV,BMP4,BMP2,MYC,EDN1,EDNRB,ACER2,BHLHE40,C1QTNF3,BTG2,LOXL2,IGF2BP1,HCLS1,RUNX2,FOXP1,ZBTB16,LAG3,EGR1,STAT3,ANKRD1"
GO: Biological Process	killing of cells in other organism involved in symbiotic interaction	4.27E-03	2.94E-02	3	13	"F2RL1,MBL2,BCL2L11"
GO: Biological Process	modulation by symbiont of host cellular process	4.27E-03	2.94E-02	3	13	"BCL2L11,ITGAV,CD4"
GO: Biological Process	disruption of cells of other organism involved in symbiotic interaction	4.27E-03	2.94E-02	3	13	"F2RL1,MBL2,BCL2L11"
GO: Biological Process	regulation of heat generation	4.27E-03	2.94E-02	3	13	"EDNRB,ARRDC3,PTGS2"
GO: Biological Process	regulation of cholesterol storage	4.27E-03	2.94E-02	3	13	"ABCA1,PPARG,ABCG1"
GO: Biological Process	negative T cell selection	4.27E-03	2.94E-02	3	13	"FAS,SPN,CD74"
GO: Biological Process	regulation of embryonic development	4.36E-03	2.99E-02	8	98	"FZD2,TGIF1,TNFAIP3,BMP4,FZD7,LFNG,LAMA2,SULF1"
GO: Biological Process	positive regulation of innate immune response	4.38E-03	3.01E-02	13	213	"F2RL1,LY96,IRAK3,TLR7,CTSS,FOS,CTSK,TNFAIP3,LRRC32,POLR3D,RFTN1,LAG3,CD74"
GO: Biological Process	glycosaminoglycan catabolic process	4.49E-03	3.06E-02	6	59	"STAB2,FUCA1,HSPG2,DCN,OGN,NAGLU"
GO: Biological Process	ovulation	4.49E-03	3.06E-02	4	26	"IL4R,PLAT,PLAU,PTGS2"
GO: Biological Process	positive regulation of leukocyte apoptotic process	4.49E-03	3.06E-02	4	26	"TGFB2,JAK3,NR4A3,MYC"
GO: Biological Process	regulation of odontogenesis	4.49E-03	3.06E-02	4	26	"BMP4,BMP2,EDN1,RUNX2"
GO: Biological Process	positive regulation of pathway-restricted SMAD protein phosphorylation	4.49E-03	3.06E-02	4	26	"GDF6,TGFB3,BMP4,BMP2"
GO: Biological Process	cellular response to heat	4.49E-03	3.06E-02	4	26	"TRPV4,THBS1,SLC52A3,CXCL10"
GO: Biological Process	regulation of cysteine-type endopeptidase activity	4.74E-03	3.21E-02	13	215	"PERP,PPARG,NLRP1,NR4A1,F2R,BCL2L11,FAS,CTSH,THBS1,MYC,ACER2,DPEP1,NGF"
GO: Biological Process	face development	4.74E-03	3.21E-02	5	42	"COL1A1,SGPL1,ALDH1A2,TGFB2,TGFB3"
GO: Biological Process	embryonic cranial skeleton morphogenesis	4.74E-03	3.21E-02	5	42	"RDH10,TGFB2,TGFB3,BMP4,RUNX2"
GO: Biological Process	regulation of homeostatic process	4.77E-03	3.23E-02	17	318	"FCER1G,FKBP1B,F2R,TGFB2,TNFAIP3,HMGN3,ITGB3,ITGAV,DIAPH1,GSTO1,MYC,EDN1,EDNRB,ARRDC3,PTGS2,SPP1,CD74"
GO: Biological Process	protein oligomerization	4.81E-03	3.25E-02	21	427	"HMOX1,COL1A1,CLU,ALOX5AP,MBL2,BCL2L11,IGF1R,FAS,MGST1,KCTD12,DCTPP1,KCTD13,TGM2,TNFAIP3,TNNT2,KCTD9,PAM,C1QTNF3,C1QTNF7,GPX3,LCN2"
GO: Biological Process	aminoglycan metabolic process	4.82E-03	3.25E-02	11	167	"STAB2,FUCA1,GAL3ST3,HSPG2,DCN,CLN6,OGN,B4GALT5,B3GNT3,B4GALT1,NAGLU"
GO: Biological Process	toll-like receptor signaling pathway	4.88E-03	3.29E-02	10	144	"F2RL1,LY96,IRAK3,TLR7,CTSS,FOS,CTSK,TNFAIP3,LRRC32,RFTN1"
GO: Biological Process	actomyosin structure organization	4.88E-03	3.29E-02	6	60	"CNN1,LIMCH1,TNNT2,EDN1,FOXP1,ANKRD1"
GO: Biological Process	negative regulation of cell projection organization	4.92E-03	3.31E-02	8	100	"FGF13,TRPV4,PMP22,SEMA3F,IL15RA,KANK1,LGALS1,SPP1"
GO: Biological Process	regulation of hormone levels	5.07E-03	3.41E-02	22	457	"PPARG,TRPV4,FKBP1B,ADM,PRKAR2B,SGPL1,ALDH1A2,MTNR1B,IGF1R,CYP26B1,RDH10,HMGN3,CYP1B1,BMP2,STARD5,EDN1,ECE1,LY6E,C1QTNF3,IRS2,NGF,NNAT"
GO: Biological Process	regulation of fat cell differentiation	5.13E-03	3.44E-02	7	80	"PPARG,ZC3H12A,FRZB,BMP2,PTGS2,ZNF385A,ZBTB16"
GO: Biological Process	negative regulation of calcium ion transport	5.17E-03	3.44E-02	4	27	"FKBP1B,ICAM1,TGFB2,PTGS2"
GO: Biological Process	endochondral ossification	5.17E-03	3.44E-02	4	27	"COL1A1,HSPG2,BMP4,RUNX2"
GO: Biological Process	pyrimidine ribonucleotide metabolic process	5.17E-03	3.44E-02	4	27	"UMPS,CTPS1,CMPK1,ENTPD4"
GO: Biological Process	replacement ossification	5.17E-03	3.44E-02	4	27	"COL1A1,HSPG2,BMP4,RUNX2"
GO: Biological Process	positive regulation of acute inflammatory response	5.17E-03	3.44E-02	4	27	"FCER1G,ALOX5AP,OSMR,PTGS2"
GO: Biological Process	monocyte differentiation	5.17E-03	3.44E-02	4	27	"PPARG,PDE2A,BMP4,MYC"
GO: Biological Process	cellular response to oxygen levels	5.23E-03	3.46E-02	8	101	"HMOX1,FAS,ANGPT4,ICAM1,PTGS2,EPAS1,EGR1,ANKRD1"
GO: Biological Process	regulation of cytokine biosynthetic process	5.23E-03	3.46E-02	8	101	"CEBPB,HMOX1,TLR7,THBS1,IGF2BP1,CD4,SPN,LAG3"
GO: Biological Process	calcium ion transport	5.23E-03	3.46E-02	17	321	"TRPV4,FKBP1B,CLCA1,F2R,CORO1A,CCL4,PDE2A,PDE4B,ICAM1,TGFB2,JAK3,ITGAV,DIAPH1,RAMP2,GSTO1,PTGS2,CACNB3"
GO: Biological Process	regulation of interleukin-8 production	5.25E-03	3.47E-02	5	43	"F2RL1,F2R,IL6R,TLR7,SERPINE1"
GO: Biological Process	lung alveolus development	5.25E-03	3.47E-02	5	43	"MAN2A1,TGFB3,KDR,BMP4,ERRFI1"
GO: Biological Process	regulation of sequence-specific DNA binding transcription factor activity	5.26E-03	3.47E-02	18	348	"PPARG,HMOX1,AGER,CLU,ZC3H12A,ANXA3,IRAK3,IL6R,IGF1R,FZD2,FOS,PIM1,ICAM1,TNFAIP3,HMGN3,NLRC5,BHLHE40,NGF"
GO: Biological Process	regulation of cyclic nucleotide biosynthetic process	5.29E-03	3.48E-02	9	123	"ABCA1,ADM,PDE2A,GNAL,RAMP2,EDN1,EDNRB,ECE1,AKAP12"
GO: Biological Process	BMP signaling pathway	5.29E-03	3.48E-02	9	123	"GDF6,KDR,BMP4,BMP2,FSTL3,NBL1,RUNX2,SULF1,EGR1"
GO: Biological Process	regulation of neuron death	5.31E-03	3.49E-02	13	218	"CEBPB,HMOX1,AGER,F2R,BCL2L11,CCL2,TGFB2,TGFB3,GHR,NR4A3,BTG2,NGF,EGR1"
GO: Biological Process	cholesterol storage	5.33E-03	3.49E-02	3	14	"ABCA1,PPARG,ABCG1"
GO: Biological Process	regulation of fibrinolysis	5.33E-03	3.49E-02	3	14	"THBS1,THBD,SERPINE1"
GO: Biological Process	positive regulation of protein kinase activity	5.47E-03	3.58E-02	22	460	"FGF13,PRKAR2B,F2R,ANG,IL6R,CCL2,ANGPT4,ATF3,PIM1,KDELR3,TGFB2,TGFB3,THBS1,GHR,ITGB3,BMP4,BMP2,EDN1,FZD5,CD4,NGF,CD74"
GO: Biological Process	regulation of reproductive process	5.49E-03	3.59E-02	7	81	"PLAT,PLAU,TIMP1,BMP4,B4GALT1,EDNRB,SULF1"
GO: Biological Process	regulation of nervous system development	5.52E-03	3.60E-02	26	575	"PPARG,FGF13,GDF6,TRPV4,PMP22,SEMA3F,MAN2A1,COL3A1,FZD2,TNFRSF12A,TGIF1,GPR56,SSH3,BMP4,BMP2,DYNLT1,IL15RA,EDNRB,NBL1,KANK1,LGALS1,PDLIM5,SPP1,NGF,STAT3,ANKRD1"
GO: Biological Process	response to acid	5.55E-03	3.62E-02	8	102	"CDO1,CEBPB,COL1A1,COL3A1,CCL2,MMP3,ICAM1,EDN1"
GO: Biological Process	positive regulation of leukocyte differentiation	5.58E-03	3.63E-02	9	124	"HLA-DQA1,HLA-DMA,IL4R,FOS,KLF10,ITGB3,IL15RA,HCLS1,CD74"
GO: Biological Process	positive regulation of peptidase activity	5.64E-03	3.67E-02	10	147	"PERP,PPARG,NLRP1,F2R,BCL2L11,FAS,FN1,CTSH,MYC,ACER2"
GO: Biological Process	lipid transport	5.66E-03	3.67E-02	14	245	"SLC27A3,ABCA1,PPARG,ABCG5,CLU,GPIHBP1,GULP1,THBS1,ITGB3,ITGAV,STARD5,APOLD1,ABCG1,IRS2"
GO: Biological Process	ribonucleotide biosynthetic process	5.66E-03	3.67E-02	14	245	"ABCA1,ADM,UMPS,PDE2A,CTPS1,GNAL,RAMP2,MYC,EDN1,EDNRB,ECE1,CMPK1,AKAP12,CHCHD10"
GO: Biological Process	negative regulation of growth	5.73E-03	3.71E-02	13	220	"PPARG,FGF13,CDKN2C,SEMA3F,MT1H,MBL2,FRZB,IRF8,TGFB2,RERG,BCL6,BMP4,SPP1"
GO: Biological Process	negative regulation of leukocyte proliferation	5.74E-03	3.71E-02	6	62	"HLA-DQA1,MNDA,TNFAIP3,LRRC32,BMP4,SPN"
GO: Biological Process	regulation of mesenchymal cell proliferation	5.80E-03	3.74E-02	5	44	"KDR,BMP4,MYC,FOXP1,IRS2"
GO: Biological Process	regulation of epithelial to mesenchymal transition	5.80E-03	3.74E-02	5	44	"AGER,COL1A1,TGFB2,TGFB3,BMP2"
GO: Biological Process	regulation of multi-organism process	5.86E-03	3.75E-02	14	246	"ADARB1,F2RL1,MBL2,BCL2L11,LY96,CCL4,IRF8,TIMP1,TNFAIP3,ITGAV,EDNRB,TARBP2,CD4,SPN"
GO: Biological Process	regulation of tumor necrosis factor production	5.87E-03	3.75E-02	7	82	"FCER1G,ZC3H12A,IRAK3,CCL4,THBS1,TNFAIP3,SPN"
GO: Biological Process	signal transduction in absence of ligand	5.87E-03	3.75E-02	7	82	"BCL2L11,FAS,TGFB2,JAK3,ITGAV,LCN2,NGF"
GO: Biological Process	extrinsic apoptotic signaling pathway in absence of ligand	5.87E-03	3.75E-02	7	82	"BCL2L11,FAS,TGFB2,JAK3,ITGAV,LCN2,NGF"
GO: Biological Process	tumor necrosis factor production	5.87E-03	3.75E-02	7	82	"FCER1G,ZC3H12A,IRAK3,CCL4,THBS1,TNFAIP3,SPN"
GO: Biological Process	regulation of adaptive immune response	5.87E-03	3.75E-02	9	125	"FCER1G,HLA-B,HLA-DMA,IL4R,TNFAIP3,JAK3,BCL6,SPN,CD74"
GO: Biological Process	receptor metabolic process	5.87E-03	3.75E-02	9	125	"PPARG,ADM,SELE,GHR,ITGB3,ITGAV,RAMP2,EDN1,ECE1"
GO: Biological Process	response to hydrogen peroxide	5.88E-03	3.75E-02	8	103	"FKBP1B,HMOX1,COL1A1,TNFAIP3,NR4A3,PXDN,GPX3,LCN2"
GO: Biological Process	regulation of actin filament polymerization	5.88E-03	3.75E-02	8	103	"WAS,PECAM1,CORO1A,ICAM1,CAPG,HCLS1,KANK1,ELN"
GO: Biological Process	keratan sulfate biosynthetic process	5.91E-03	3.76E-02	4	28	"OGN,B4GALT5,B3GNT3,B4GALT1"
GO: Biological Process	regulation of myeloid leukocyte mediated immunity	5.91E-03	3.76E-02	4	28	"FCER1G,HMOX1,F2RL1,PRAM1"
GO: Biological Process	divalent inorganic cation transport	6.07E-03	3.85E-02	18	353	"TRPV4,FKBP1B,CLCA1,F2R,CORO1A,CCL4,PDE2A,PDE4B,ICAM1,TGFB2,JAK3,ITGAV,DIAPH1,RAMP2,GSTO1,NIPA1,PTGS2,CACNB3"
GO: Biological Process	regulation of cytoskeleton organization	6.08E-03	3.86E-02	17	326	"FGF13,TRPV4,F2RL1,WAS,PECAM1,CORO1A,PLEK,ICAM1,SSH3,PAM,DYNLT1,CAPG,EDN1,HCLS1,EPHA1,KANK1,ELN"
GO: Biological Process	reproduction	6.09E-03	3.86E-02	47	1224	"CDO1,ADM,SGPL1,ANG,BCL2L11,IL4R,UMPS,FRZB,IGF1R,FZD2,CCL2,CYP26B1,MGST1,MAFF,PLAT,FOS,PLAU,CTSH,RPL29,RDH10,ICAM1,TGFB2,TGFB3,THBD,TIMP1,GJB2,KDR,JUNB,BCL6,ITGAV,BMP4,B4GALT1,RAMP2,FZD7,PAM,FSTL3,EDN1,EDNRB,PTGS2,CMPK1,FZD5,LFNG,CD9,SULF1,SPP1,ZBTB16,STAT3"
GO: Biological Process	positive regulation of cytoskeleton organization	6.18E-03	3.91E-02	9	126	"TRPV4,F2RL1,WAS,CORO1A,PLEK,ICAM1,EDN1,HCLS1,EPHA1"
GO: Biological Process	positive regulation of cysteine-type endopeptidase activity	6.18E-03	3.91E-02	9	126	"PERP,PPARG,NLRP1,F2R,BCL2L11,FAS,CTSH,MYC,ACER2"
GO: Biological Process	regulation of protein import into nucleus	6.19E-03	3.91E-02	10	149	"TLR7,PDE2A,TGFB3,BMP4,FZD7,PTGS2,LITAF,C1QTNF3,HCLS1,KANK1"
GO: Biological Process	endothelial cell differentiation	6.20E-03	3.91E-02	6	63	"F2RL1,PDE2A,KDR,COL18A1,BMP4,APOLD1"
GO: Biological Process	regulation of leukocyte proliferation	6.26E-03	3.94E-02	11	173	"HLA-DQA1,CORO1A,MNDA,TNFAIP3,JAK3,BCL6,LRRC32,BMP4,IRS2,SPN,CD74"
GO: Biological Process	regulation of interleukin-12 production	6.39E-03	4.01E-02	5	45	"HLA-B,IRAK3,IRF8,THBS1,JAK3"
GO: Biological Process	gliogenesis	6.40E-03	4.01E-02	12	198	"PPARG,CDKN2C,CCL2,FN1,ADAM22,TGFB2,BMP4,BMP2,KLF15,CD9,EGR1,STAT3"
GO: Biological Process	negative regulation of macromolecule biosynthetic process	6.43E-03	4.01E-02	43	1101	"PPARG,CEBPB,AGER,CIRBP,PER2,FABP4,PER3,ANG,PER1,IL6R,CCL4,PDE2A,IRF8,ATF3,CRY2,WWP1,TGIF1,TGFB3,KLF10,JAK3,ZFP57,BCL6,ITGB3,UXT,ITGAV,BMP4,BMP2,MYC,EDN1,EDNRB,ACER2,BHLHE40,BTG2,LOXL2,IGF2BP1,HCLS1,RUNX2,FOXP1,ZBTB16,LAG3,EGR1,STAT3,ANKRD1"
GO: Biological Process	tissue morphogenesis	6.45E-03	4.01E-02	25	553	"ADM,ALDH1A2,FRZB,SOCS3,COL5A1,IGF1R,FZD2,CTSH,RDH10,TGM2,TGIF1,TGFB2,FAT4,KDR,TNNT2,NR4A3,BMP4,BMP2,B4GALT1,MYC,EDN1,LY6E,FZD5,SULF1,ANKRD1"
GO: Biological Process	cellular response to nitrogen compound	6.49E-03	4.01E-02	22	467	"PPARG,CEBPB,COL1A1,PRKAR2B,SOCS3,IGF1R,COL3A1,PDE2A,PDE4B,MMP3,ICAM1,GHR,RBM3,JAK3,DIAPH1,PTGS2,TARBP2,DPEP1,IRS2,KANK1,EGR1,STAT3"
GO: Biological Process	ribose phosphate biosynthetic process	6.50E-03	4.01E-02	14	249	"ABCA1,ADM,UMPS,PDE2A,CTPS1,GNAL,RAMP2,MYC,EDN1,EDNRB,ECE1,CMPK1,AKAP12,CHCHD10"
GO: Biological Process	positive regulation of nucleobase-containing compound metabolic process	6.53E-03	4.01E-02	51	1357	"ABCA1,PPARG,HOXB9,CEBPB,GDF6,HOXD10,NR4A1,ADM,COL1A1,F2RL1,F2R,LDB2,ANXA3,IGF1R,FZD2,IRF8,FOS,KCTD13,TGFB3,DBP,HMGN3,GNAL,JAK3,JUNB,NR4A3,BMP4,SERPINE1,BMP2,KLF15,ITGA6,RAMP2,NLRC5,FZD7,TEF,FSTL3,MYC,ECE1,BTG2,HCLS1,AKAP12,RUNX2,FZD5,EPAS1,FOXP1,TNFSF8,CREB3L1,ELF4,ZBTB16,EGR1,STAT3,ANKRD1"
GO: Biological Process	positive regulation of extrinsic apoptotic signaling pathway in absence of ligand	6.54E-03	4.01E-02	3	15	"FAS,TGFB2,JAK3"
GO: Biological Process	regulation of protein homooligomerization	6.54E-03	4.01E-02	3	15	"CLU,BCL2L11,FAS"
GO: Biological Process	positive regulation of cytosolic calcium ion concentration involved in phospholipase C-activating G-protein coupled signaling pathway	6.54E-03	4.01E-02	3	15	"F2R,TGM2,EDN1"
GO: Biological Process	positive regulation of epithelial cell proliferation involved in wound healing	6.57E-03	4.01E-02	2	5	"B4GALT1,FZD7"
GO: Biological Process	riboflavin metabolic process	6.57E-03	4.01E-02	2	5	"FLAD1,SLC52A3"
GO: Biological Process	cellular triglyceride homeostasis	6.57E-03	4.01E-02	2	5	"SLC25A27,C1QTNF3"
GO: Biological Process	cellular response to hyperoxia	6.57E-03	4.01E-02	2	5	"FAS,EGR1"
GO: Biological Process	BMP signaling pathway involved in heart development	6.57E-03	4.01E-02	2	5	"BMP4,BMP2"
GO: Biological Process	epithelial fluid transport	6.57E-03	4.01E-02	2	5	"EDN1,EDNRB"
GO: Biological Process	interleukin-4-mediated signaling pathway	6.57E-03	4.01E-02	2	5	"IL4R,JAK3"
GO: Biological Process	negative regulation of plasminogen activation	6.57E-03	4.01E-02	2	5	"THBS1,SERPINE1"
GO: Biological Process	regulation of ovulation	6.57E-03	4.01E-02	2	5	"PLAT,PLAU"
GO: Biological Process	cellular response to increased oxygen levels	6.57E-03	4.01E-02	2	5	"FAS,EGR1"
GO: Biological Process	positive regulation of actin filament depolymerization	6.57E-03	4.01E-02	2	5	"F2RL1,PLEK"
GO: Biological Process	positive regulation of myeloid leukocyte mediated immunity	6.57E-03	4.01E-02	2	5	"FCER1G,F2RL1"
GO: Biological Process	smooth muscle cell-matrix adhesion	6.57E-03	4.01E-02	2	5	"PLAU,SERPINE1"
GO: Biological Process	integrin biosynthetic process	6.57E-03	4.01E-02	2	5	"COL5A1,TGFB2"
GO: Biological Process	cellular lactam metabolic process	6.57E-03	4.01E-02	2	5	"GHR,DPEP1"
GO: Biological Process	regulation of systemic arterial blood pressure by endothelin	6.57E-03	4.01E-02	2	5	"EDN1,ECE1"
GO: Biological Process	positive regulation of MAPK cascade	6.60E-03	4.02E-02	18	356	"F2RL1,F2R,IL6R,IGF1R,IGFBP3,TGFB2,TGFB3,THBS1,KDR,GHR,ITGAV,BMP4,BMP2,FZD7,EDN1,C1QTNF3,FZD5,CD74"
GO: Biological Process	regulation of bone mineralization	6.70E-03	4.06E-02	6	64	"FBN2,TGFB3,BMP4,BMP2,CREB3L1,IFITM5"
GO: Biological Process	negative regulation of B cell activation	6.71E-03	4.06E-02	4	29	"FAS,MNDA,TNFAIP3,BCL6"
GO: Biological Process	positive regulation of positive chemotaxis	6.71E-03	4.06E-02	4	29	"FIGF,AGER,F2RL1,KDR"
GO: Biological Process	defense response to Gram-negative bacterium	6.71E-03	4.06E-02	4	29	"F2RL1,IL6R,SERPINE1,CD4"
GO: Biological Process	regulation of heart contraction	6.78E-03	4.10E-02	10	151	"FKBP1B,ADM,ADRA1D,PDE4B,TGFB2,TNNT2,GSTO1,EDN1,CELF2,EPAS1"
GO: Biological Process	regulation of ossification	6.80E-03	4.11E-02	11	175	"FBN2,CEBPB,IL6R,TGFB2,TGFB3,BMP4,BMP2,RUNX2,CREB3L1,IFITM5,ZBTB16"
GO: Biological Process	regulation of endopeptidase activity	6.81E-03	4.11E-02	16	303	"PERP,PPARG,NLRP1,NR4A1,F2R,BCL2L11,FAS,CTSH,THBS1,TIMP1,SERPINE1,MYC,ACER2,SPINT2,DPEP1,NGF"
GO: Biological Process	regulation of lymphocyte differentiation	6.84E-03	4.12E-02	9	128	"HLA-DQA1,HLA-DMA,IL4R,FAS,JAK3,BCL6,BMP4,IL15RA,CD74"
GO: Biological Process	regulation of cell morphogenesis involved in differentiation	6.88E-03	4.14E-02	13	225	"FGF13,SEMA3F,AGER,COL1A1,TNFRSF12A,TGFB2,TGFB3,SSH3,BMP2,KANK1,PDLIM5,SPP1,NGF"
GO: Biological Process	regulation of neuron apoptotic process	6.92E-03	4.16E-02	12	200	"CEBPB,HMOX1,AGER,F2R,BCL2L11,CCL2,TGFB2,TGFB3,NR4A3,BTG2,NGF,EGR1"
GO: Biological Process	T cell apoptotic process	7.01E-03	4.20E-02	5	46	"BCL2L11,FAS,TGFB2,JAK3,BMP4"
GO: Biological Process	negative regulation of protein secretion	7.01E-03	4.20E-02	5	46	"F2RL1,F2R,RHBDF2,LRRC32,C1QTNF3"
GO: Biological Process	interleukin-8 production	7.01E-03	4.20E-02	5	46	"F2RL1,F2R,IL6R,TLR7,SERPINE1"
GO: Biological Process	B cell mediated immunity	7.19E-03	4.30E-02	9	129	"FCER1G,CLU,HLA-DMA,MBL2,FAS,BCL6,C1R,SWAP70,CD74"
GO: Biological Process	stem cell proliferation	7.19E-03	4.30E-02	9	129	"FGF13,ABCB1,KDR,BMP4,BMP2,MYC,FOXP1,IRS2,NGF"
GO: Biological Process	cellular defense response	7.22E-03	4.30E-02	6	65	"LY96,CCL17,TYROBP,CXCL9,MNDA,SPN"
GO: Biological Process	neural crest cell differentiation	7.22E-03	4.30E-02	6	65	"SEMA3F,ALDH1A2,FRZB,RDH10,EDN1,EDNRB"
GO: Biological Process	tyrosine phosphorylation of STAT protein	7.22E-03	4.30E-02	6	65	"F2R,IL6R,PECAM1,GHR,JAK3,HCLS1"
GO: Biological Process	positive regulation of cellular protein metabolic process	7.27E-03	4.33E-02	37	921	"PERP,FGF13,GDF6,AGER,PRKAR2B,CIRBP,CLU,FAM129A,F2R,ANG,IL6R,PECAM1,CCL2,ANGPT4,ATF3,PIM1,KDELR3,ICAM1,CLN6,TGFB2,TGFB3,THBS1,KDR,GHR,RBM3,ITGB3,BMP4,BMP2,EDN1,EDNRB,ARRDC3,HCLS1,FZD5,CD4,SPN,NGF,CD74"
GO: Biological Process	protein phosphorylation	7.39E-03	4.39E-02	51	1366	"FGF13,CDKN2C,GDF6,ADARB1,AGER,PRKAR2B,FABP4,NEK6,FAM129A,F2R,ANG,IRAK3,IL6R,UCHL1,SOCS3,TLR7,IGF1R,IGFBP3,PECAM1,CDK18,MAP3K8,CCL2,ANGPT4,ATF3,PIM1,KDELR3,ICAM1,TGFB2,TGFB3,THBS1,KDR,GHR,TNFAIP3,JAK3,ITGB3,BMP4,BMP2,BMX,CCNYL1,SH3BP5,EDN1,EDNRB,ERRFI1,HCLS1,TARBP2,FZD5,EPHA1,CD4,SPN,NGF,CD74"
GO: Biological Process	negative regulation of response to external stimulus	7.42E-03	4.40E-02	10	153	"PPARG,SEMA3F,IER3,CCL2,TNFAIP3,SERPINE1,C1QTNF3,NBL1,SPN,SPP1"
GO: Biological Process	cell morphogenesis involved in neuron differentiation	7.52E-03	4.46E-02	27	619	"FGF13,SEMA3F,S100A6,FRZB,UCHL1,COL5A1,IGF1R,COL3A1,FZD2,TYROBP,TNFRSF12A,TGFB2,SPON2,SSH3,NR4A3,ITGB3,ITGAV,FZD7,CACNB3,FZD5,FOXP1,LAMA2,PDLIM5,RAC2,SPP1,CDH11,NGF"
GO: Biological Process	monocyte chemotaxis	7.58E-03	4.46E-02	4	30	"IL6R,CCL2,SERPINE1,NBL1"
GO: Biological Process	sarcomere organization	7.58E-03	4.46E-02	4	30	"TNNT2,EDN1,FOXP1,ANKRD1"
GO: Biological Process	production of molecular mediator involved in inflammatory response	7.58E-03	4.46E-02	4	30	"FCER1G,ALOX5AP,IL4R,SERPINE1"
GO: Biological Process	regulation of positive chemotaxis	7.58E-03	4.46E-02	4	30	"FIGF,AGER,F2RL1,KDR"
GO: Biological Process	tumor necrosis factor superfamily cytokine production	7.58E-03	4.46E-02	7	86	"FCER1G,ZC3H12A,IRAK3,CCL4,THBS1,TNFAIP3,SPN"
GO: Biological Process	positive regulation of purine nucleotide biosynthetic process	7.58E-03	4.46E-02	7	86	"ABCA1,ADM,GNAL,RAMP2,MYC,ECE1,AKAP12"
GO: Biological Process	positive regulation of nucleotide biosynthetic process	7.58E-03	4.46E-02	7	86	"ABCA1,ADM,GNAL,RAMP2,MYC,ECE1,AKAP12"
GO: Biological Process	superoxide metabolic process	7.68E-03	4.50E-02	5	47	"SOD3,F2RL1,CYBB,EDN1,FBLN5"
GO: Biological Process	interleukin-12 production	7.68E-03	4.50E-02	5	47	"HLA-B,IRAK3,IRF8,THBS1,JAK3"
GO: Biological Process	interleukin-1 beta production	7.68E-03	4.50E-02	5	47	"ABCA1,NLRP1,F2RL1,F2R,TNFAIP3"
GO: Biological Process	regulation of cysteine-type endopeptidase activity involved in apoptotic process	7.75E-03	4.53E-02	12	203	"PPARG,NLRP1,NR4A1,F2R,BCL2L11,FAS,CTSH,THBS1,MYC,ACER2,DPEP1,NGF"
GO: Biological Process	aminoglycan catabolic process	7.77E-03	4.53E-02	6	66	"STAB2,FUCA1,HSPG2,DCN,OGN,NAGLU"
GO: Biological Process	sterol transport	7.77E-03	4.53E-02	6	66	"ABCA1,PPARG,ABCG5,CLU,GPIHBP1,ABCG1"
GO: Biological Process	cholesterol transport	7.77E-03	4.53E-02	6	66	"ABCA1,PPARG,ABCG5,CLU,GPIHBP1,ABCG1"
GO: Biological Process	plasminogen activation	7.89E-03	4.58E-02	3	16	"PLAT,THBS1,SERPINE1"
GO: Biological Process	cell proliferation involved in kidney development	7.89E-03	4.58E-02	3	16	"BMP4,MYC,EGR1"
GO: Biological Process	germinal center formation	7.89E-03	4.58E-02	3	16	"HLA-DMA,TNFAIP3,BCL6"
GO: Biological Process	cellular response to lithium ion	7.89E-03	4.58E-02	3	16	"PPARG,FABP4,FAS"
GO: Biological Process	chondrocyte differentiation	8.07E-03	4.67E-02	7	87	"HSPG2,BMP4,BMP2,LOXL2,RUNX2,SULF1,ZBTB16"
GO: Biological Process	inner ear development	8.34E-03	4.83E-02	11	180	"HLA-B,HLA-DMA,FRZB,FZD2,TGFB3,FAT4,NR4A3,BMP4,BMP2,SLC25A27,NAGLU"
GO: Biological Process	organ regeneration	8.39E-03	4.85E-02	5	48	"PPARG,ADM,CCL2,NR4A3,LCP1"
GO: Biological Process	regulation of extrinsic apoptotic signaling pathway	8.45E-03	4.88E-02	10	156	"HMOX1,FAS,TNFRSF12A,TGFB2,THBS1,TNFAIP3,JAK3,ITGAV,SERPINE1,ITGA6"
GO: Biological Process	regulation of sensory perception	8.53E-03	4.89E-02	4	31	"F2R,CTSS,EDN1,EDNRB"
GO: Biological Process	regulation of sensory perception of pain	8.53E-03	4.89E-02	4	31	"F2R,CTSS,EDN1,EDNRB"
GO: Biological Process	regulation of vascular permeability	8.53E-03	4.89E-02	4	31	"ADM,CCL4,PDE2A,RAMP2"
GO: Biological Process	regulation of vascular endothelial growth factor receptor signaling pathway	8.53E-03	4.89E-02	4	31	"FIGF,KDR,ITGB3,BMP4"
GO: Biological Process	chaperone-mediated protein folding	8.53E-03	4.89E-02	4	31	"FKBP5,CLU,HLA-DMA,CD74"
GO: Biological Process	cellular extravasation	8.53E-03	4.89E-02	4	31	"SELE,PECAM1,CCL2,ICAM1"
GO: Biological Process	positive regulation of T cell activation	8.67E-03	4.97E-02	11	181	"HLA-DQA1,HLA-DMA,IL4R,CORO1A,MAP3K8,CCL2,JAK3,LGALS1,CD4,SPN,CD74"
GO: Biological Process	regulation of phosphatidylinositol 3-kinase signaling	8.96E-03	5.12E-02	6	68	"PIK3IP1,F2RL1,F2R,TGFB2,KDR,HCLS1"
GO: Biological Process	endothelium development	8.96E-03	5.12E-02	6	68	"F2RL1,PDE2A,KDR,COL18A1,BMP4,APOLD1"
GO: Biological Process	defense response to virus	8.98E-03	5.13E-02	12	207	"ADARB1,F2RL1,TLR7,CXCL9,TNFAIP3,POLR3D,NLRC5,CXCL10,GBP1,TARBP2,CD4,SPN"
GO: Biological Process	positive regulation of cyclic nucleotide metabolic process	9.10E-03	5.19E-02	7	89	"ABCA1,ADM,FZD2,GNAL,RAMP2,ECE1,AKAP12"
GO: Biological Process	regulation of protein localization to nucleus	9.21E-03	5.24E-02	10	158	"TLR7,PDE2A,TGFB3,BMP4,FZD7,PTGS2,LITAF,C1QTNF3,HCLS1,KANK1"
GO: Biological Process	glycosaminoglycan metabolic process	9.21E-03	5.24E-02	10	158	"STAB2,FUCA1,HSPG2,DCN,CLN6,OGN,B4GALT5,B3GNT3,B4GALT1,NAGLU"
GO: Biological Process	secretory granule organization	9.39E-03	5.31E-02	3	17	"ABCA1,F2R,ZNF385A"
GO: Biological Process	nitric-oxide synthase biosynthetic process	9.39E-03	5.31E-02	3	17	"CCL2,KDR,EDN1"
GO: Biological Process	regulation of nitric-oxide synthase biosynthetic process	9.39E-03	5.31E-02	3	17	"CCL2,KDR,EDN1"
GO: Biological Process	reverse cholesterol transport	9.39E-03	5.31E-02	3	17	"ABCA1,CLU,ABCG1"
GO: Biological Process	nucleotide biosynthetic process	9.42E-03	5.31E-02	16	314	"ABCA1,FLAD1,ADM,AK1,UMPS,PDE2A,CTPS1,GNAL,RAMP2,MYC,EDN1,EDNRB,ECE1,CMPK1,AKAP12,CHCHD10"
GO: Biological Process	negative regulation of developmental growth	9.55E-03	5.31E-02	4	32	"FGF13,SEMA3F,BMP4,SPP1"
GO: Biological Process	negative regulation of homeostatic process	9.55E-03	5.31E-02	4	32	"FKBP1B,TGFB2,TNFAIP3,ARRDC3"
GO: Biological Process	positive regulation of bone mineralization	9.55E-03	5.31E-02	4	32	"FBN2,TGFB3,BMP4,BMP2"
GO: Biological Process	positive regulation of endopeptidase activity	9.56E-03	5.31E-02	9	135	"PERP,PPARG,NLRP1,F2R,BCL2L11,FAS,CTSH,MYC,ACER2"
GO: Biological Process	negative regulation of angiogenesis	9.60E-03	5.31E-02	6	69	"CCL2,ANGPT4,THBS1,SERPINE1,CXCL10,SULF1"
GO: Biological Process	positive regulation of cytokine secretion	9.60E-03	5.31E-02	6	69	"NLRP1,F2RL1,F2R,IL4R,CLEC4M,C1QTNF3"
GO: Biological Process	positive regulation of kinase activity	9.64E-03	5.31E-02	22	484	"FGF13,PRKAR2B,F2R,ANG,IL6R,CCL2,ANGPT4,ATF3,PIM1,KDELR3,TGFB2,TGFB3,THBS1,GHR,ITGB3,BMP4,BMP2,EDN1,FZD5,CD4,NGF,CD74"
GO: Biological Process	regulation of hepatocyte proliferation	9.69E-03	5.31E-02	2	6	"PLAU,TNFAIP3"
GO: Biological Process	"Wnt signaling pathway, calcium modulating pathway"	9.69E-03	5.31E-02	2	6	"FZD2,FZD7"
GO: Biological Process	protein localization to extracellular region	9.69E-03	5.31E-02	2	6	"FBN2,NBL1"
GO: Biological Process	renin secretion into blood stream	9.69E-03	5.31E-02	2	6	"F2RL1,F2R"
GO: Biological Process	regulation of toll-like receptor 2 signaling pathway	9.69E-03	5.31E-02	2	6	"F2RL1,TNFAIP3"
GO: Biological Process	regulation of plasma membrane long-chain fatty acid transport	9.69E-03	5.31E-02	2	6	"THBS1,IRS2"
GO: Biological Process	positive regulation of synaptic plasticity	9.69E-03	5.31E-02	2	6	"CPLX2,PTGS2"
GO: Biological Process	bud elongation involved in lung branching	9.69E-03	5.31E-02	2	6	"RDH10,BMP4"
GO: Biological Process	positive regulation of interleukin-6 secretion	9.69E-03	5.31E-02	2	6	"F2RL1,F2R"
GO: Biological Process	intramembranous ossification	9.69E-03	5.31E-02	2	6	"COL1A1,CTSK"
GO: Biological Process	regulation of natural killer cell chemotaxis	9.69E-03	5.31E-02	2	6	"CCL4,CCL2"
GO: Biological Process	elastic fiber assembly	9.69E-03	5.31E-02	2	6	"LOX,FBLN5"
GO: Biological Process	direct ossification	9.69E-03	5.31E-02	2	6	"COL1A1,CTSK"
GO: Biological Process	negative regulation of collagen biosynthetic process	9.69E-03	5.31E-02	2	6	"AGER,IL6R"
GO: Biological Process	wound healing involved in inflammatory response	9.69E-03	5.31E-02	2	6	"HMOX1,F2R"
GO: Biological Process	response to heparin	9.69E-03	5.31E-02	2	6	"GPIHBP1,EGR1"
GO: Biological Process	locomotion involved in locomotory behavior	9.69E-03	5.31E-02	2	6	"CLN6,ARRDC3"
GO: Biological Process	flavin-containing compound metabolic process	9.69E-03	5.31E-02	2	6	"FLAD1,SLC52A3"
GO: Biological Process	maintenance of protein location in extracellular region	9.69E-03	5.31E-02	2	6	"FBN2,NBL1"
GO: Biological Process	extracellular transport	9.69E-03	5.31E-02	2	6	"SLC1A5,DYNLT1"
GO: Biological Process	regulation of apoptotic cell clearance	9.69E-03	5.31E-02	2	6	"CCL2,ITGAV"
GO: Biological Process	positive regulation of interleukin-8 secretion	9.69E-03	5.31E-02	2	6	"F2RL1,F2R"
GO: Biological Process	cellular homeostasis	9.73E-03	5.32E-02	28	662	"CD52,TRPV4,FKBP1B,HMOX1,ADM,MT1H,F2RL1,F2R,CP,FZD2,CCL2,ICAM1,TGM2,CLN6,TGFB2,HMGN3,JAK3,ITGAV,DIAPH1,GSTO1,MYC,EDN1,EDNRB,SLC25A27,C1QTNF3,LGALS1,LCN2,CXCL1"
GO: Biological Process	regulation of nucleocytoplasmic transport	9.74E-03	5.32E-02	11	184	"IER3,TLR7,PDE2A,TGFB3,BMP4,FZD7,PTGS2,LITAF,C1QTNF3,HCLS1,KANK1"
GO: Biological Process	carboxylic acid metabolic process	9.89E-03	5.40E-02	37	940	"SLC27A3,PPARG,CDO1,ACSF2,PRKAR2B,SGPL1,FABP4,ALDH1A2,ALOX5AP,PGD,DEGS2,CYP39A1,CYP26B1,ANKRD23,CTPS1,PTPLA,MGST1,RDH10,DCN,SLC7A5,GHR,CYP4V2,CYP1B1,BCKDHA,PAM,GSTO1,EDN1,PTGS2,CMPK1,CARS,DPEP1,IRS2,GPX3,GSTA3,EHHADH,ENOPH1,CD74"
GO: Biological Process	activation of protein kinase activity	9.94E-03	5.42E-02	14	262	"PRKAR2B,F2R,ANG,IL6R,ANGPT4,TGFB2,TGFB3,THBS1,GHR,ITGB3,BMP4,BMP2,NGF,CD74"
GO: Biological Process	positive regulation of peptidyl-tyrosine phosphorylation	1.00E-02	5.45E-02	9	136	"IL6R,PECAM1,ANGPT4,ICAM1,GHR,ITGB3,HCLS1,CD4,CD74"
GO: Biological Process	embryonic organ morphogenesis	1.00E-02	5.45E-02	15	289	"HOXB6,HOXD10,ALDH1A2,FRZB,FZD2,HSPG2,RDH10,TGFB2,TGFB3,NR4A3,BMP4,MYC,EDN1,NAGLU,RUNX2"
GO: Biological Process	I-kappaB kinase/NF-kappaB signaling	1.01E-02	5.46E-02	13	236	"HMOX1,TNFRSF19,NEK6,F2RL1,F2R,LY96,TLR7,TGM2,TNFAIP3,PTGS2,LITAF,C1QTNF3,LGALS1"
GO: Biological Process	cytokine biosynthetic process	1.01E-02	5.48E-02	8	113	"CEBPB,HMOX1,TLR7,THBS1,IGF2BP1,CD4,SPN,LAG3"
GO: Biological Process	nucleoside phosphate biosynthetic process	1.03E-02	5.56E-02	16	317	"ABCA1,FLAD1,ADM,AK1,UMPS,PDE2A,CTPS1,GNAL,RAMP2,MYC,EDN1,EDNRB,ECE1,CMPK1,AKAP12,CHCHD10"
GO: Biological Process	regulation of biomineral tissue development	1.03E-02	5.56E-02	6	70	"FBN2,TGFB3,BMP4,BMP2,CREB3L1,IFITM5"
GO: Biological Process	extrinsic apoptotic signaling pathway via death domain receptors	1.03E-02	5.56E-02	6	70	"HMOX1,FAS,THBS1,TNFAIP3,SERPINE1,NGF"
GO: Biological Process	regulation of I-kappaB kinase/NF-kappaB signaling	1.04E-02	5.60E-02	12	211	"HMOX1,TNFRSF19,NEK6,F2RL1,F2R,TLR7,TGM2,TNFAIP3,PTGS2,LITAF,C1QTNF3,LGALS1"
GO: Biological Process	cellular lipid metabolic process	1.04E-02	5.63E-02	36	912	"SLC27A3,ABCA1,PPARG,ARSG,ACSF2,PLD4,PRKAR2B,SGPL1,FABP4,ALDH1A2,ALOX5AP,ANG,DEGS2,ACP6,CYP26B1,ANKRD23,PTPLA,PLEK,HSPG2,RDH10,CLN6,LGALS13,GHR,CYP4V2,CYP1B1,GM2A,PAM,EDN1,ACER2,PTGS2,DPEP1,ABCG1,IRS2,EHHADH,CD74,ANKRD1"
GO: Biological Process	cyclic purine nucleotide metabolic process	1.05E-02	5.64E-02	9	137	"ABCA1,ADM,PDE2A,GNAL,RAMP2,EDN1,EDNRB,ECE1,AKAP12"
GO: Biological Process	protein maturation	1.05E-02	5.66E-02	11	186	"FKBP1B,MBL2,CFP,PLAT,CTSH,THBS1,SERPINE1,MYC,ECE1,LDLRAD3,NGF"
GO: Biological Process	response to peptide hormone	1.06E-02	5.68E-02	19	402	"PPARG,CDO1,ADM,COL1A1,PRKAR2B,SOCS3,IGF1R,PLAT,TIMP1,GHR,JAK3,JUNB,NR4A3,BTG2,IRS2,KANK1,NGF,EGR1,STAT3"
GO: Biological Process	regulation of adaptive immune response based on somatic recombination of immune receptors built from immunoglobulin superfamily domains	1.06E-02	5.68E-02	8	114	"FCER1G,HLA-B,HLA-DMA,IL4R,TNFAIP3,JAK3,BCL6,SPN"
GO: Biological Process	positive regulation of secretion	1.06E-02	5.68E-02	15	291	"FCER1G,NLRP1,F2RL1,F2R,ANG,IL4R,TGFB2,TGFB3,CLEC4M,EDN1,EDNRB,C1QTNF3,IRS2,NNAT,ANKRD1"
GO: Biological Process	stem cell division	1.06E-02	5.68E-02	4	33	"FGF13,TGFB2,FZD7,ZBTB16"
GO: Biological Process	regulation of pathway-restricted SMAD protein phosphorylation	1.06E-02	5.68E-02	4	33	"GDF6,TGFB3,BMP4,BMP2"
GO: Biological Process	cellular response to calcium ion	1.06E-02	5.68E-02	4	33	"ALOX5AP,FOS,JUNB,DPEP1"
GO: Biological Process	keratan sulfate metabolic process	1.06E-02	5.68E-02	4	33	"OGN,B4GALT5,B3GNT3,B4GALT1"
GO: Biological Process	positive regulation of Ras protein signal transduction	1.06E-02	5.68E-02	4	33	"F2RL1,F2R,COL3A1,GPR56"
GO: Biological Process	face morphogenesis	1.06E-02	5.68E-02	4	33	"COL1A1,SGPL1,TGFB2,TGFB3"
GO: Biological Process	muscle system process	1.07E-02	5.68E-02	17	346	"ACTA2,CHRNB1,FKBP1B,HMOX1,CNN1,F2R,COL14A1,PDE4B,LMOD1,TNNT2,KLF15,GSTO1,EDN1,EDNRB,ECE1,PTGS2,SULF1"
GO: Biological Process	regulation of systemic arterial blood pressure mediated by a chemical signal	1.08E-02	5.75E-02	5	51	"ADRA1D,F2RL1,F2R,EDN1,ECE1"
GO: Biological Process	positive regulation of endocytosis	1.08E-02	5.75E-02	7	92	"FCER1G,SELE,F2RL1,MBL2,CCL2,ITGAV,SERPINE1"
GO: Biological Process	negative regulation of secretion	1.09E-02	5.77E-02	10	162	"PPARG,FKBP1B,HMOX1,F2RL1,F2R,RHBDF2,LRRC32,EDN1,C1QTNF3,CD74"
GO: Biological Process	hormone metabolic process	1.09E-02	5.79E-02	11	187	"ADM,SGPL1,ALDH1A2,IGF1R,CYP26B1,RDH10,CYP1B1,BMP2,STARD5,ECE1,NGF"
GO: Biological Process	cyclic nucleotide biosynthetic process	1.09E-02	5.80E-02	9	138	"ABCA1,ADM,PDE2A,GNAL,RAMP2,EDN1,EDNRB,ECE1,AKAP12"
GO: Biological Process	SMAD protein signal transduction	1.11E-02	5.82E-02	3	18	"FOS,BMP4,BMP2"
GO: Biological Process	positive regulation of protein complex disassembly	1.11E-02	5.82E-02	3	18	"TRPV4,F2RL1,PLEK"
GO: Biological Process	vascular smooth muscle contraction	1.11E-02	5.82E-02	3	18	"ACTA2,EDN1,EDNRB"
GO: Biological Process	morphogenesis of an epithelial bud	1.11E-02	5.82E-02	3	18	"RDH10,BMP4,SULF1"
GO: Biological Process	nucleobase-containing small molecule interconversion	1.11E-02	5.82E-02	3	18	"AK1,CTPS1,CMPK1"
GO: Biological Process	positive regulation of neutrophil chemotaxis	1.11E-02	5.82E-02	3	18	"SELL,EDN1,CD74"
GO: Biological Process	calcium-mediated signaling	1.12E-02	5.86E-02	8	115	"FKBP1B,SELE,CCL4,PLEK,KDR,GSTO1,EDN1,CD4"
GO: Biological Process	negative regulation of defense response	1.12E-02	5.86E-02	8	115	"PPARG,IER3,HLA-B,IRAK3,TNFAIP3,C1QTNF3,TARBP2,SPN"
GO: Biological Process	positive regulation of protein modification process	1.12E-02	5.89E-02	33	823	"FGF13,GDF6,AGER,PRKAR2B,CLU,FAM129A,F2R,ANG,IL6R,PECAM1,CCL2,ANGPT4,ATF3,PIM1,KDELR3,ICAM1,TGFB2,TGFB3,THBS1,KDR,GHR,ITGB3,BMP4,BMP2,EDN1,EDNRB,ARRDC3,HCLS1,FZD5,CD4,SPN,NGF,CD74"
GO: Biological Process	cellular response to hypoxia	1.14E-02	6.00E-02	7	93	"HMOX1,ANGPT4,ICAM1,PTGS2,EPAS1,EGR1,ANKRD1"
GO: Biological Process	lymphocyte proliferation	1.15E-02	6.02E-02	12	214	"FKBP1B,HLA-DQA1,CORO1A,MNDA,JAK3,BCL6,LRRC32,BMP4,IRS2,ELF4,SPN,CD74"
GO: Biological Process	cellular response to external stimulus	1.15E-02	6.02E-02	12	214	"HMOX1,COL1A1,TLR7,FAS,PDE2A,FOS,ICAM1,ITGA6,PTGS2,LCN2,EGR1,ANKRD1"
GO: Biological Process	regulation of MAPK cascade	1.17E-02	6.10E-02	23	522	"F2RL1,F2R,IRAK3,IL6R,UCHL1,IGF1R,IGFBP3,TGFB2,TGFB3,THBS1,KDR,GHR,ITGAV,BMP4,BMP2,FZD7,MYC,EDN1,ECE1,C1QTNF3,FZD5,NGF,CD74"
GO: Biological Process	interleukin-1 production	1.17E-02	6.10E-02	5	52	"ABCA1,NLRP1,F2RL1,F2R,TNFAIP3"
GO: Biological Process	cellular response to retinoic acid	1.17E-02	6.10E-02	5	52	"ABCA1,COL1A1,ALDH1A2,CYP26B1,FZD7"
GO: Biological Process	positive regulation of cell-substrate adhesion	1.17E-02	6.10E-02	6	72	"COL8A1,THBS1,KDR,ITGA6,EPHA1,SPP1"
GO: Biological Process	ERK1 and ERK2 cascade	1.18E-02	6.10E-02	10	164	"F2RL1,F2R,CTSH,KDR,ITGAV,BMP4,BMP2,ECE1,C1QTNF3,CD74"
GO: Biological Process	cardiac muscle tissue development	1.18E-02	6.10E-02	10	164	"ALDH1A2,COL14A1,HSPG2,TGFB2,TNNT2,BMP4,BMP2,LY6E,FOXP1,ANKRD1"
GO: Biological Process	positive regulation of vasoconstriction	1.18E-02	6.10E-02	4	34	"ADRA1D,F2R,ICAM1,PTGS2"
GO: Biological Process	regulation of cholesterol transport	1.18E-02	6.10E-02	4	34	"ABCA1,PPARG,ABCG5,ABCG1"
GO: Biological Process	positive regulation of biomineral tissue development	1.18E-02	6.10E-02	4	34	"FBN2,TGFB3,BMP4,BMP2"
GO: Biological Process	positive regulation of muscle contraction	1.18E-02	6.10E-02	4	34	"F2R,GSTO1,EDN1,PTGS2"
GO: Biological Process	regulation of sterol transport	1.18E-02	6.10E-02	4	34	"ABCA1,PPARG,ABCG5,ABCG1"
GO: Biological Process	response to nicotine	1.18E-02	6.10E-02	4	34	"CHRNB1,HMOX1,EDN1,NGF"
GO: Biological Process	insulin-like growth factor receptor signaling pathway	1.18E-02	6.10E-02	4	34	"IGF1R,IGFBP3,GHR,BMP2"
GO: Biological Process	response to hexose	1.20E-02	6.16E-02	9	140	"FKBP1B,ICAM1,THBS1,HMGN3,PTGS2,IRS2,LGALS1,NNAT,EGR1"
GO: Biological Process	embryonic placenta development	1.21E-02	6.22E-02	7	94	"CEBPB,ADM,SOCS3,JUNB,ITGAV,FZD5,EPAS1"
GO: Biological Process	regulation of cell size	1.21E-02	6.22E-02	7	94	"FGF13,SEMA3F,TNFRSF12A,PLEK,EDN1,SPP1,NGF"
GO: Biological Process	cellular response to decreased oxygen levels	1.21E-02	6.22E-02	7	94	"HMOX1,ANGPT4,ICAM1,PTGS2,EPAS1,EGR1,ANKRD1"
GO: Biological Process	central nervous system development	1.22E-02	6.25E-02	31	766	"PPARG,FGF13,CDKN2C,HOXD10,ALDH1A2,ANG,BCL2L11,FRZB,TSPAN2,IGF1R,COL3A1,FZD2,HSPG2,ADAM22,WWP1,GPR56,NR4A3,BMP4,BMP2,FZD7,PAM,NAGLU,BTG2,FZD5,IRS2,CD9,ZBTB16,CDH11,NNAT,EGR1,STAT3"
GO: Biological Process	cytokine metabolic process	1.23E-02	6.30E-02	8	117	"CEBPB,HMOX1,TLR7,THBS1,IGF2BP1,CD4,SPN,LAG3"
GO: Biological Process	mononuclear cell proliferation	1.23E-02	6.31E-02	12	216	"FKBP1B,HLA-DQA1,CORO1A,MNDA,JAK3,BCL6,LRRC32,BMP4,IRS2,ELF4,SPN,CD74"
GO: Biological Process	positive regulation of cAMP biosynthetic process	1.25E-02	6.39E-02	6	73	"ABCA1,ADM,GNAL,RAMP2,ECE1,AKAP12"
GO: Biological Process	positive regulation of transferase activity	1.25E-02	6.41E-02	22	496	"FGF13,PRKAR2B,F2R,ANG,IL6R,CCL2,ANGPT4,ATF3,PIM1,KDELR3,TGFB2,TGFB3,THBS1,GHR,ITGB3,BMP4,BMP2,EDN1,FZD5,CD4,NGF,CD74"
GO: Biological Process	positive regulation of phosphatidylinositol 3-kinase signaling	1.27E-02	6.45E-02	5	53	"F2RL1,F2R,TGFB2,KDR,HCLS1"
GO: Biological Process	regulation of phagocytosis	1.27E-02	6.45E-02	5	53	"FCER1G,F2RL1,MBL2,CCL2,ITGAV"
GO: Biological Process	regulation of release of sequestered calcium ion into cytosol	1.27E-02	6.45E-02	5	53	"FKBP1B,F2R,TGFB2,DIAPH1,GSTO1"
GO: Biological Process	glomerular filtration	1.29E-02	6.50E-02	3	19	"F2RL1,F2R,SULF1"
GO: Biological Process	regulation of neuron migration	1.29E-02	6.50E-02	3	19	"COL3A1,GPR56,STAT3"
GO: Biological Process	T-helper 1 cell differentiation	1.29E-02	6.50E-02	3	19	"IL4R,RELB,JAK3"
GO: Biological Process	positive regulation of chondrocyte differentiation	1.29E-02	6.50E-02	3	19	"LOXL2,RUNX2,ZBTB16"
GO: Biological Process	negative regulation of leukocyte migration	1.29E-02	6.50E-02	3	19	"HMOX1,CCL2,NBL1"
GO: Biological Process	renal filtration	1.29E-02	6.50E-02	3	19	"F2RL1,F2R,SULF1"
GO: Biological Process	parturition	1.29E-02	6.50E-02	3	19	"CCL2,MAFF,EDN1"
GO: Biological Process	SMAD protein import into nucleus	1.29E-02	6.50E-02	3	19	"TGFB2,TGFB3,BMP4"
GO: Biological Process	heat generation	1.29E-02	6.50E-02	3	19	"EDNRB,ARRDC3,PTGS2"
GO: Biological Process	positive regulation of chemokine production	1.31E-02	6.52E-02	4	35	"IL4R,IL6R,TLR7,CD74"
GO: Biological Process	regulation of lymphocyte proliferation	1.32E-02	6.52E-02	10	167	"HLA-DQA1,CORO1A,MNDA,JAK3,BCL6,LRRC32,BMP4,IRS2,SPN,CD74"
GO: Biological Process	positive regulation of protein import into nucleus	1.33E-02	6.52E-02	6	74	"TLR7,TGFB3,BMP4,PTGS2,HCLS1,KANK1"
GO: Biological Process	negative regulation of release of sequestered calcium ion into cytosol	1.33E-02	6.52E-02	2	7	"FKBP1B,TGFB2"
GO: Biological Process	epithelial cell proliferation involved in liver morphogenesis	1.33E-02	6.52E-02	2	7	"PLAU,TNFAIP3"
GO: Biological Process	response to low-density lipoprotein particle	1.33E-02	6.52E-02	2	7	"ABCA1,PPARG"
GO: Biological Process	virion attachment to host cell	1.33E-02	6.52E-02	2	7	"ICAM1,CLEC4M"
GO: Biological Process	adhesion of symbiont to host cell	1.33E-02	6.52E-02	2	7	"ICAM1,CLEC4M"
GO: Biological Process	adhesion to host	1.33E-02	6.52E-02	2	7	"ICAM1,CLEC4M"
GO: Biological Process	regulation of glomerular mesangial cell proliferation	1.33E-02	6.52E-02	2	7	"BMP4,EGR1"
GO: Biological Process	liver morphogenesis	1.33E-02	6.52E-02	2	7	"PLAU,TNFAIP3"
GO: Biological Process	positive regulation of killing of cells of other organism	1.33E-02	6.52E-02	2	7	"F2RL1,BCL2L11"
GO: Biological Process	vascular wound healing	1.33E-02	6.52E-02	2	7	"TNFAIP3,SERPINE1"
GO: Biological Process	negative regulation of collagen metabolic process	1.33E-02	6.52E-02	2	7	"AGER,IL6R"
GO: Biological Process	taurine metabolic process	1.33E-02	6.52E-02	2	7	"CDO1,GHR"
GO: Biological Process	regulation of prostatic bud formation	1.33E-02	6.52E-02	2	7	"BMP4,SULF1"
GO: Biological Process	cellular response to arsenic-containing substance	1.33E-02	6.52E-02	2	7	"HMOX1,GSTO1"
GO: Biological Process	maternal process involved in parturition	1.33E-02	6.52E-02	2	7	"CCL2,EDN1"
GO: Biological Process	negative regulation of collateral sprouting	1.33E-02	6.52E-02	2	7	"FGF13,SPP1"
GO: Biological Process	positive regulation of transcription from RNA polymerase II promoter involved in cellular response to chemical stimulus	1.33E-02	6.52E-02	2	7	"BMP2,RUNX2"
GO: Biological Process	negative regulation of lipoprotein metabolic process	1.33E-02	6.52E-02	2	7	"ITGB3,ITGAV"
GO: Biological Process	negative regulation of glycolysis	1.33E-02	6.52E-02	2	7	"IER3,STAT3"
GO: Biological Process	regulation of low-density lipoprotein particle receptor biosynthetic process	1.33E-02	6.52E-02	2	7	"ITGB3,ITGAV"
GO: Biological Process	embryonic neurocranium morphogenesis	1.33E-02	6.52E-02	2	7	"TGFB2,TGFB3"
GO: Biological Process	positive regulation of odontogenesis	1.33E-02	6.52E-02	2	7	"BMP2,EDN1"
GO: Biological Process	renal response to blood flow involved in circulatory renin-angiotensin regulation of systemic arterial blood pressure	1.33E-02	6.52E-02	2	7	"F2RL1,F2R"
GO: Biological Process	regulation of transcription from RNA polymerase II promoter in response to oxidative stress	1.33E-02	6.52E-02	2	7	"HMOX1,EPAS1"
GO: Biological Process	hepatocyte proliferation	1.33E-02	6.52E-02	2	7	"PLAU,TNFAIP3"
GO: Biological Process	G1 to G0 transition	1.33E-02	6.52E-02	2	7	"ZNF503,C2orf40"
GO: Biological Process	menstrual cycle phase	1.33E-02	6.52E-02	2	7	"TGFB2,TGFB3"
GO: Biological Process	regulation of actin nucleation	1.33E-02	6.52E-02	2	7	"WAS,CORO1A"
GO: Biological Process	sequestering of extracellular ligand from receptor	1.33E-02	6.52E-02	2	7	"FBN2,NBL1"
GO: Biological Process	positive regulation of cysteine-type endopeptidase activity involved in apoptotic process	1.35E-02	6.60E-02	8	119	"PPARG,NLRP1,F2R,BCL2L11,FAS,CTSH,MYC,ACER2"
GO: Biological Process	epithelium development	1.36E-02	6.63E-02	36	929	"PPARG,ACTA2,CEBPB,ADM,F2RL1,ALDH1A2,FRZB,SOCS3,COL5A1,IGF1R,PECAM1,FZD2,PDE2A,MAFF,CTSH,RDH10,TGM2,TGIF1,TGFB2,FAT4,KDR,COL18A1,BMP4,BMP2,KLF15,B4GALT1,FZD7,MYC,EDN1,EDNRB,APOLD1,PTGS2,ERRFI1,FZD5,FOXP1,SULF1"
GO: Biological Process	regulation of protein processing	1.36E-02	6.65E-02	5	54	"MBL2,CFP,THBS1,SERPINE1,LDLRAD3"
GO: Biological Process	homotypic cell-cell adhesion	1.36E-02	6.65E-02	5	54	"PTPRU,PLEK,ITGB3,LGALS1,SPN"
GO: Biological Process	regulation of mononuclear cell proliferation	1.38E-02	6.70E-02	10	168	"HLA-DQA1,CORO1A,MNDA,JAK3,BCL6,LRRC32,BMP4,IRS2,SPN,CD74"
GO: Biological Process	striated muscle cell differentiation	1.41E-02	6.84E-02	12	220	"CHRNB1,COL14A1,UCHL1,IGFBP3,CYP26B1,MBNL3,TNNT2,BMP4,BMP2,EDN1,FOXP1,ANKRD1"
GO: Biological Process	neuron projection regeneration	1.44E-02	6.99E-02	4	36	"ADM,FAS,RTN4RL2,SPP1"
GO: Biological Process	pyrimidine ribonucleoside metabolic process	1.44E-02	6.99E-02	4	36	"UMPS,CTPS1,CMPK1,ENTPD4"
GO: Biological Process	regulation of bone resorption	1.44E-02	6.99E-02	4	36	"TNFAIP3,ITGB3,ITGAV,SPP1"
GO: Biological Process	morphogenesis of an epithelium	1.44E-02	7.00E-02	20	444	"ADM,ALDH1A2,FRZB,SOCS3,COL5A1,IGF1R,FZD2,CTSH,RDH10,TGM2,TGIF1,FAT4,KDR,BMP4,BMP2,B4GALT1,MYC,EDN1,FZD5,SULF1"
GO: Biological Process	response to monosaccharide	1.48E-02	7.09E-02	9	145	"FKBP1B,ICAM1,THBS1,HMGN3,PTGS2,IRS2,LGALS1,NNAT,EGR1"
GO: Biological Process	gland morphogenesis	1.48E-02	7.09E-02	8	121	"FRZB,IGF1R,TGM2,TGFB2,TGFB3,BMP4,B4GALT1,SULF1"
GO: Biological Process	pattern recognition receptor signaling pathway	1.48E-02	7.09E-02	10	170	"F2RL1,LY96,IRAK3,TLR7,CTSS,FOS,CTSK,TNFAIP3,LRRC32,RFTN1"
GO: Biological Process	negative regulation of extrinsic apoptotic signaling pathway via death domain receptors	1.49E-02	7.09E-02	3	20	"HMOX1,TNFAIP3,SERPINE1"
GO: Biological Process	negative regulation of alpha-beta T cell activation	1.49E-02	7.09E-02	3	20	"IL4R,JAK3,BCL6"
GO: Biological Process	viral entry into host cell	1.49E-02	7.09E-02	3	20	"WWP1,ITGAV,DYNLT1"
GO: Biological Process	labyrinthine layer morphogenesis	1.49E-02	7.09E-02	3	20	"ADM,SOCS3,FZD5"
GO: Biological Process	response to vitamin D	1.49E-02	7.09E-02	3	20	"CXCL10,PTGS2,SPP1"
GO: Biological Process	negative regulation of toll-like receptor signaling pathway	1.49E-02	7.09E-02	3	20	"F2RL1,IRAK3,TNFAIP3"
GO: Biological Process	positive regulation of vascular endothelial growth factor receptor signaling pathway	1.49E-02	7.09E-02	3	20	"KDR,ITGB3,BMP4"
GO: Biological Process	decidualization	1.49E-02	7.09E-02	3	20	"JUNB,PTGS2,SPP1"
GO: Biological Process	cAMP catabolic process	1.49E-02	7.09E-02	3	20	"PDE2A,PDE4B,PDE7B"
GO: Biological Process	regulation of metanephros development	1.49E-02	7.09E-02	3	20	"BMP4,MYC,EGR1"
GO: Biological Process	regulation of osteoblast proliferation	1.49E-02	7.09E-02	3	20	"ITGB3,ITGAV,BMP2"
GO: Biological Process	positive regulation of granulocyte chemotaxis	1.49E-02	7.09E-02	3	20	"SELL,EDN1,CD74"
GO: Biological Process	intrinsic apoptotic signaling pathway in response to DNA damage	1.50E-02	7.13E-02	7	98	"HMOX1,IER3,CLU,BCL2L11,MYC,ZNF385A,CD74"
GO: Biological Process	antigen processing and presentation of peptide or polysaccharide antigen via MHC class II	1.50E-02	7.13E-02	7	98	"FCER1G,HLA-DQA1,HLA-DMA,CTSS,IFI30,THBS1,CD74"
GO: Biological Process	positive regulation of cAMP metabolic process	1.50E-02	7.15E-02	6	76	"ABCA1,ADM,GNAL,RAMP2,ECE1,AKAP12"
GO: Biological Process	in utero embryonic development	1.54E-02	7.33E-02	18	389	"CEBPB,ADM,BCL2L11,MAN2A1,SOCS3,MAFF,RDH10,ATP1B1,TGFB3,JUNB,ITGAV,BMP2,EDN1,LY6E,FZD5,EPAS1,FOXP1,PTPRR"
GO: Biological Process	regulation of cellular carbohydrate metabolic process	1.55E-02	7.36E-02	8	122	"IER3,IGFBP3,PLEK,MYC,ACER2,C1QTNF3,IRS2,STAT3"
GO: Biological Process	regulation of muscle cell differentiation	1.55E-02	7.36E-02	8	122	"COL14A1,IGFBP3,CYP26B1,MBNL3,BMP4,BMP2,EDN1,FOXP1"
GO: Biological Process	protein complex assembly	1.56E-02	7.37E-02	41	1098	"FGF13,TRPV4,HMOX1,COL1A1,CLU,NEK6,WAS,HLA-DMA,ALOX5AP,ANG,MBL2,BCL2L11,FBLIM1,IGF1R,PECAM1,CORO1A,FAS,MGST1,IRF8,ANGPT4,PLEK,KCTD12,DCTPP1,KCTD13,ICAM1,TGM2,TNFAIP3,TNNT2,DIAPH1,KCTD9,PAM,CAPG,HIST1H1C,C1QTNF3,C1QTNF7,HCLS1,KANK1,GPX3,ELN,LCN2,CD74"
GO: Biological Process	oxidation-reduction process	1.56E-02	7.39E-02	37	970	"PPARG,GPR116,CDO1,SOD3,HMOX1,PHYHD1,PRKAR2B,ALDH1A2,PGD,DEGS2,CP,CYP39A1,CYP26B1,MGST1,RDH10,IFI30,SDR39U1,CYP4B1,CYP4V2,CYP1B1,CYBB,BCKDHA,BMP2,PAM,GSTO1,MYC,PTGS2,GFOD2,H6PD,PXDN,LOX,LOXL2,IRS2,P4HA3,GPX3,CYGB,EHHADH"
GO: Biological Process	macromolecular complex assembly	1.57E-02	7.44E-02	46	1261	"ABCA1,FGF13,TRPV4,HMOX1,COL1A1,CIRBP,PTBP2,CLU,NEK6,WAS,HLA-DMA,ALOX5AP,ANG,MBL2,BCL2L11,FBLIM1,IGF1R,PECAM1,CORO1A,FAS,MGST1,IRF8,ANGPT4,PLEK,KCTD12,DCTPP1,KCTD13,ICAM1,TGM2,TNFAIP3,TNNT2,DIAPH1,KCTD9,PAM,CAPG,HIST1H1C,C1QTNF3,C1QTNF7,HCLS1,CELF2,TARBP2,KANK1,GPX3,ELN,LCN2,CD74"
GO: Biological Process	regulation of growth	1.58E-02	7.45E-02	25	597	"PPARG,FGF13,CDKN2C,SEMA3F,MT1H,SGPL1,WISP1,MBL2,BCL2L11,COL14A1,FRZB,SOCS3,IGFBP3,IRF8,TNFRSF12A,TGFB2,GHR,RERG,BCL6,BMP4,FOXP1,SPP1,NGF,FBLN5,STAT3"
GO: Biological Process	modification of morphology or physiology of other organism involved in symbiotic interaction	1.58E-02	7.45E-02	18	390	"F2RL1,HLA-B,CLDN1,MBL2,BCL2L11,TLR7,CCL4,WWP1,ICAM1,KDR,CLEC4M,ITGB3,ITGAV,DYNLT1,MYC,CD4,ZYX,STAT3"
GO: Biological Process	head development	1.58E-02	7.45E-02	5	56	"COL1A1,SGPL1,ALDH1A2,TGFB2,TGFB3"
GO: Biological Process	regulation of extrinsic apoptotic signaling pathway via death domain receptors	1.58E-02	7.45E-02	4	37	"HMOX1,THBS1,TNFAIP3,SERPINE1"
GO: Biological Process	head morphogenesis	1.58E-02	7.45E-02	4	37	"COL1A1,SGPL1,TGFB2,TGFB3"
GO: Biological Process	interaction with symbiont	1.58E-02	7.45E-02	4	37	"F2RL1,MBL2,CCL4,ICAM1"
GO: Biological Process	regulation of protein complex disassembly	1.60E-02	7.49E-02	6	77	"FGF13,TRPV4,F2RL1,IRAK3,PLEK,CAPG"
GO: Biological Process	protein complex biogenesis	1.60E-02	7.49E-02	41	1100	"FGF13,TRPV4,HMOX1,COL1A1,CLU,NEK6,WAS,HLA-DMA,ALOX5AP,ANG,MBL2,BCL2L11,FBLIM1,IGF1R,PECAM1,CORO1A,FAS,MGST1,IRF8,ANGPT4,PLEK,KCTD12,DCTPP1,KCTD13,ICAM1,TGM2,TNFAIP3,TNNT2,DIAPH1,KCTD9,PAM,CAPG,HIST1H1C,C1QTNF3,C1QTNF7,HCLS1,KANK1,GPX3,ELN,LCN2,CD74"
GO: Biological Process	protein processing	1.60E-02	7.49E-02	10	172	"MBL2,CFP,PLAT,CTSH,THBS1,SERPINE1,MYC,ECE1,LDLRAD3,NGF"
GO: Biological Process	regulation of calcium ion transport	1.60E-02	7.49E-02	10	172	"FKBP1B,F2R,CCL4,PDE4B,ICAM1,TGFB2,JAK3,DIAPH1,GSTO1,PTGS2"
GO: Biological Process	monosaccharide metabolic process	1.62E-02	7.56E-02	15	306	"IER3,PGD,MAN2A1,FUCA1,IGFBP3,GAL3ST3,ATF3,B4GALT1,GSTO1,MYC,C1QTNF3,H6PD,IRS2,ENO3,STAT3"
GO: Biological Process	regulation of epithelial cell differentiation	1.66E-02	7.75E-02	7	100	"FRZB,MAFF,TGFB2,BMP4,APOLD1,ERRFI1,FOXP1"
GO: Biological Process	cell-cell junction assembly	1.69E-02	7.87E-02	6	78	"TRPV4,GJB2,RAMP2,CLDN15,FZD5,CD9"
GO: Biological Process	nuclear transport	1.69E-02	7.87E-02	18	393	"IER3,F2R,TLR7,PDE2A,CRY2,TGFB2,TGFB3,JAK3,BCL6,BMP4,FZD7,DYNLT1,PTGS2,LITAF,C1QTNF3,HCLS1,KANK1,STAT3"
GO: Biological Process	positive regulation of extrinsic apoptotic signaling pathway	1.70E-02	7.87E-02	5	57	"FAS,TNFRSF12A,TGFB2,THBS1,JAK3"
GO: Biological Process	cytokine secretion	1.70E-02	7.87E-02	8	124	"ABCA1,NLRP1,F2RL1,F2R,IL4R,LRRC32,CLEC4M,C1QTNF3"
GO: Biological Process	C21-steroid hormone biosynthetic process	1.70E-02	7.87E-02	3	21	"ADM,BMP2,STARD5"
GO: Biological Process	tolerance induction	1.70E-02	7.87E-02	3	21	"HLA-B,IRAK3,TNFAIP3"
GO: Biological Process	negative regulation of interleukin-6 production	1.70E-02	7.87E-02	3	21	"ZC3H12A,IRAK3,TNFAIP3"
GO: Biological Process	glial cell migration	1.70E-02	7.87E-02	3	21	"CCL2,FN1,TGFB2"
GO: Biological Process	regulation of transforming growth factor beta production	1.70E-02	7.87E-02	3	21	"TGFB2,THBS1,PTGS2"
GO: Biological Process	transforming growth factor beta production	1.70E-02	7.87E-02	3	21	"TGFB2,THBS1,PTGS2"
GO: Biological Process	thymocyte apoptotic process	1.70E-02	7.87E-02	3	21	"BCL2L11,JAK3,BMP4"
GO: Biological Process	innate immune response-activating signal transduction	1.72E-02	7.90E-02	10	174	"F2RL1,LY96,IRAK3,TLR7,CTSS,FOS,CTSK,TNFAIP3,LRRC32,RFTN1"
GO: Biological Process	cell growth	1.73E-02	7.90E-02	19	423	"PPARG,FGF13,CDKN2C,SEMA3F,WISP1,IL6R,COL14A1,FRZB,IGFBP3,TNFRSF12A,TGFB2,TGFB3,RERG,BCL6,EDN1,EMP1,SPP1,NGF,FBLN5"
GO: Biological Process	positive regulation of small GTPase mediated signal transduction	1.73E-02	7.90E-02	4	38	"F2RL1,F2R,COL3A1,GPR56"
GO: Biological Process	"CD4-positive, alpha-beta T cell differentiation involved in immune response"	1.73E-02	7.90E-02	4	38	"IL4R,RELB,JAK3,BCL6"
GO: Biological Process	T-helper cell differentiation	1.73E-02	7.90E-02	4	38	"IL4R,RELB,JAK3,BCL6"
GO: Biological Process	negative regulation of neuron death	1.73E-02	7.90E-02	9	149	"CEBPB,HMOX1,F2R,CCL2,TGFB3,GHR,NR4A3,BTG2,NGF"
GO: Biological Process	regulation of T cell differentiation	1.74E-02	7.90E-02	7	101	"HLA-DQA1,HLA-DMA,IL4R,JAK3,BCL6,BMP4,CD74"
GO: Biological Process	apoptotic signaling pathway	1.74E-02	7.90E-02	24	572	"PERP,PLEKHF1,HMOX1,IER3,CLU,TM2D1,BCL2L11,IL6R,FAS,TNFRSF12A,CTSH,TGFB2,THBS1,TNFAIP3,JAK3,ITGAV,SERPINE1,ITGA6,MYC,SPN,LCN2,ZNF385A,NGF,CD74"
GO: Biological Process	regulation of type B pancreatic cell apoptotic process	1.75E-02	7.90E-02	2	8	"AGER,NGF"
GO: Biological Process	pyrimidine dimer repair	1.75E-02	7.90E-02	2	8	"CRY2,DDB2"
GO: Biological Process	glomerular mesangial cell proliferation	1.75E-02	7.90E-02	2	8	"BMP4,EGR1"
GO: Biological Process	natural killer cell chemotaxis	1.75E-02	7.90E-02	2	8	"CCL4,CCL2"
GO: Biological Process	negative regulation of leukocyte chemotaxis	1.75E-02	7.90E-02	2	8	"CCL2,NBL1"
GO: Biological Process	retinoic acid biosynthetic process	1.75E-02	7.90E-02	2	8	"ALDH1A2,RDH10"
GO: Biological Process	negative regulation of glycoprotein biosynthetic process	1.75E-02	7.90E-02	2	8	"JAK3,ACER2"
GO: Biological Process	platelet dense granule organization	1.75E-02	7.90E-02	2	8	"ABCA1,F2R"
GO: Biological Process	disruption by host of symbiont cells	1.75E-02	7.90E-02	2	8	"F2RL1,MBL2"
GO: Biological Process	vascular smooth muscle cell development	1.75E-02	7.90E-02	2	8	"ADM,RAMP2"
GO: Biological Process	negative regulation of thymocyte apoptotic process	1.75E-02	7.90E-02	2	8	"JAK3,BMP4"
GO: Biological Process	regulation of dendritic cell antigen processing and presentation	1.75E-02	7.90E-02	2	8	"THBS1,CD74"
GO: Biological Process	chemokine (C-X-C motif) ligand 2 production	1.75E-02	7.90E-02	2	8	"F2RL1,CD74"
GO: Biological Process	negative regulation of fatty acid transport	1.75E-02	7.90E-02	2	8	"THBS1,IRS2"
GO: Biological Process	tendon development	1.75E-02	7.90E-02	2	8	"COL5A1,BMP4"
GO: Biological Process	regulation of interleukin-8 secretion	1.75E-02	7.90E-02	2	8	"F2RL1,F2R"
GO: Biological Process	dendritic cell antigen processing and presentation	1.75E-02	7.90E-02	2	8	"THBS1,CD74"
GO: Biological Process	killing by host of symbiont cells	1.75E-02	7.90E-02	2	8	"F2RL1,MBL2"
GO: Biological Process	negative regulation of sequence-specific DNA binding transcription factor activity	1.77E-02	7.99E-02	8	125	"HMOX1,ZC3H12A,IRAK3,IGF1R,PIM1,TNFAIP3,NLRC5,BHLHE40"
GO: Biological Process	immunoglobulin mediated immune response	1.77E-02	7.99E-02	8	125	"FCER1G,CLU,HLA-DMA,MBL2,BCL6,C1R,SWAP70,CD74"
GO: Biological Process	negative regulation of ion transport	1.79E-02	8.07E-02	6	79	"FKBP1B,ICAM1,TGFB2,THBS1,PTGS2,IRS2"
GO: Biological Process	regulation of neuron differentiation	1.81E-02	8.14E-02	19	425	"FGF13,GDF6,TRPV4,PMP22,SEMA3F,TNFRSF12A,TGIF1,SSH3,BMP4,BMP2,IL15RA,EDNRB,NBL1,KANK1,LGALS1,PDLIM5,SPP1,NGF,ANKRD1"
GO: Biological Process	neural crest cell development	1.82E-02	8.17E-02	5	58	"SEMA3F,ALDH1A2,RDH10,EDN1,EDNRB"
GO: Biological Process	organonitrogen compound biosynthetic process	1.82E-02	8.18E-02	28	697	"ABCA1,CDO1,FLAD1,ADM,SGPL1,DEGS2,SAT1,UMPS,PDE2A,CTPS1,HSPG2,DCN,TGFB2,GNAL,OGN,B4GALT5,B3GNT3,B4GALT1,RAMP2,MYC,EDN1,EDNRB,ACER2,ECE1,CMPK1,AKAP12,CHCHD10,ENOPH1"
GO: Biological Process	ribonucleotide metabolic process	1.83E-02	8.20E-02	36	949	"ABCA1,DOCK4,ADM,ABCG5,AK1,ELMOD1,ABCB1,UMPS,PECAM1,FZD2,PDE2A,PDE4B,CTPS1,RAB37,ATP1B1,ICAM1,RERG,TNNT2,GNAL,BCL6,RAMP2,DYNLT1,MYC,EDN1,EDNRB,ECE1,ERRFI1,CMPK1,RAB3D,AKAP12,ENTPD4,ABCG1,EPHA1,PDE7B,CHCHD10,RAC2"
GO: Biological Process	regulation of muscle system process	1.85E-02	8.29E-02	10	176	"FKBP1B,CNN1,F2R,COL14A1,PDE4B,TNNT2,GSTO1,EDN1,ECE1,PTGS2"
GO: Biological Process	peptide transport	1.86E-02	8.36E-02	13	256	"ABCA1,PPARG,TRPV4,FKBP1B,PRKAR2B,MTNR1B,SLC15A3,HMGN3,CLEC4M,EDN1,IRS2,NNAT,CD74"
GO: Biological Process	"positive regulation of transcription, DNA-templated"	1.87E-02	8.36E-02	42	1144	"PPARG,HOXB9,CEBPB,GDF6,HOXD10,NR4A1,COL1A1,F2RL1,F2R,LDB2,FZD2,IRF8,FOS,TGFB3,DBP,HMGN3,JAK3,JUNB,NR4A3,BMP4,SERPINE1,BMP2,KLF15,ITGA6,NLRC5,FZD7,TEF,FSTL3,MYC,BTG2,HCLS1,RUNX2,FZD5,EPAS1,FOXP1,TNFSF8,CREB3L1,ELF4,ZBTB16,EGR1,STAT3,ANKRD1"
GO: Biological Process	transmembrane receptor protein tyrosine kinase signaling pathway	1.88E-02	8.41E-02	28	699	"FIGF,NR4A1,PRKAR2B,SGPL1,BCL2L11,SOCS3,MPZL1,IGF1R,IGFBP3,CCL2,ANGPT4,PLAT,THBS1,KDR,GHR,JAK3,ITGB3,BMP4,BMP2,ERRFI1,RUNX2,IRS2,EPHA1,KANK1,CD4,SULF1,NGF,STAT3"
GO: Biological Process	lipid metabolic process	1.89E-02	8.41E-02	45	1243	"SLC27A3,ABCA1,PPARG,GPR116,ARSG,ADM,ACSF2,PLD4,PRKAR2B,SGPL1,PIK3IP1,FABP4,CLU,ALDH1A2,ALOX5AP,ANG,DEGS2,ACP6,IGF1R,CYP39A1,CYP26B1,ANKRD23,PTPLA,PLEK,HSPG2,RDH10,CLN6,LGALS13,GHR,CYP4V2,CYP1B1,GM2A,BMP2,STARD5,PAM,EDN1,ACER2,PTGS2,DPEP1,ABCG1,IRS2,CPNE7,EHHADH,CD74,ANKRD1"
GO: Biological Process	hydrogen peroxide metabolic process	1.89E-02	8.41E-02	4	39	"CYBB,PXDN,GPX3,RAC2"
GO: Biological Process	temperature homeostasis	1.89E-02	8.41E-02	4	39	"EDNRB,ARRDC3,PTGS2,STAT3"
GO: Biological Process	regulation of chondrocyte differentiation	1.89E-02	8.41E-02	4	39	"BMP4,LOXL2,RUNX2,ZBTB16"
GO: Biological Process	positive regulation of mesenchymal cell proliferation	1.89E-02	8.41E-02	4	39	"KDR,MYC,FOXP1,IRS2"
GO: Biological Process	immune response-activating signal transduction	1.89E-02	8.41E-02	17	369	"FCER1G,F2RL1,WAS,HLA-DQA1,LY96,IRAK3,TLR7,PDE4B,CTSS,FOS,CTSK,MNDA,TNFAIP3,LRRC32,CACNB3,RFTN1,CD4"
GO: Biological Process	negative regulation of sequestering of calcium ion	1.89E-02	8.41E-02	6	80	"FKBP1B,F2R,TGFB2,ITGAV,DIAPH1,GSTO1"
GO: Biological Process	antigen processing and presentation of exogenous peptide antigen via MHC class I	1.89E-02	8.41E-02	6	80	"FCER1G,HLA-B,CTSS,IFI30,CYBB,ITGAV"
GO: Biological Process	release of sequestered calcium ion into cytosol	1.89E-02	8.41E-02	6	80	"FKBP1B,F2R,TGFB2,ITGAV,DIAPH1,GSTO1"
GO: Biological Process	heart contraction	1.91E-02	8.49E-02	10	177	"FKBP1B,ADM,ADRA1D,PDE4B,TGFB2,TNNT2,GSTO1,EDN1,CELF2,EPAS1"
GO: Biological Process	regulation of carbohydrate metabolic process	1.93E-02	8.51E-02	8	127	"IER3,IGFBP3,PLEK,MYC,ACER2,C1QTNF3,IRS2,STAT3"
GO: Biological Process	regulation of systemic arterial blood pressure by circulatory renin-angiotensin	1.93E-02	8.51E-02	3	22	"F2RL1,F2R,ECE1"
GO: Biological Process	positive regulation of blood vessel endothelial cell migration	1.93E-02	8.51E-02	3	22	"ANGPT4,THBS1,PTGS2"
GO: Biological Process	cyclic nucleotide catabolic process	1.93E-02	8.51E-02	3	22	"PDE2A,PDE4B,PDE7B"
GO: Biological Process	negative regulation of innate immune response	1.93E-02	8.51E-02	3	22	"HLA-B,IRAK3,TNFAIP3"
GO: Biological Process	positive regulation of cytokine-mediated signaling pathway	1.93E-02	8.51E-02	3	22	"NLRC5,EDN1,CD74"
GO: Biological Process	somatic stem cell division	1.93E-02	8.51E-02	3	22	"FGF13,TGFB2,FZD7"
GO: Biological Process	negative regulation of hydrolase activity	1.94E-02	8.52E-02	15	313	"FKBP1B,NR4A1,PECAM1,PI16,CRY2,TGFB2,THBS1,TIMP1,TIMP3,TNNT2,PI15,SERPINE1,SPINT2,DPEP1,SPINK8"
GO: Biological Process	negative regulation of lymphocyte proliferation	1.94E-02	8.52E-02	5	59	"HLA-DQA1,MNDA,LRRC32,BMP4,SPN"
GO: Biological Process	myoblast differentiation	1.94E-02	8.52E-02	5	59	"IGFBP3,MBNL3,BMP4,EPAS1,LGALS1"
GO: Biological Process	negative regulation of mononuclear cell proliferation	1.94E-02	8.52E-02	5	59	"HLA-DQA1,MNDA,LRRC32,BMP4,SPN"
GO: Biological Process	regulation of tissue remodeling	1.94E-02	8.52E-02	5	59	"TNFAIP3,ITGB3,ITGAV,B4GALT1,SPP1"
GO: Biological Process	ribose phosphate metabolic process	1.96E-02	8.59E-02	36	954	"ABCA1,DOCK4,ADM,ABCG5,AK1,ELMOD1,ABCB1,UMPS,PECAM1,FZD2,PDE2A,PDE4B,CTPS1,RAB37,ATP1B1,ICAM1,RERG,TNNT2,GNAL,BCL6,RAMP2,DYNLT1,MYC,EDN1,EDNRB,ECE1,ERRFI1,CMPK1,RAB3D,AKAP12,ENTPD4,ABCG1,EPHA1,PDE7B,CHCHD10,RAC2"
GO: Biological Process	heart process	1.98E-02	8.68E-02	10	178	"FKBP1B,ADM,ADRA1D,PDE4B,TGFB2,TNNT2,GSTO1,EDN1,CELF2,EPAS1"
GO: Biological Process	positive regulation of neuron differentiation	2.00E-02	8.75E-02	6	81	"GDF6,TGIF1,BMP4,BMP2,NBL1,NGF"
GO: Biological Process	regulation of sequestering of calcium ion	2.00E-02	8.75E-02	6	81	"FKBP1B,F2R,TGFB2,ITGAV,DIAPH1,GSTO1"
GO: Biological Process	peptide metabolic process	2.01E-02	8.79E-02	7	104	"MGST1,CTSH,PAM,ECE1,DPEP1,GPX3,GSTA3"
GO: Biological Process	regulation of protein polymerization	2.01E-02	8.79E-02	8	128	"WAS,PECAM1,CORO1A,ICAM1,CAPG,HCLS1,KANK1,ELN"
GO: Biological Process	negative regulation of cellular biosynthetic process	2.02E-02	8.79E-02	42	1150	"PPARG,CEBPB,CIRBP,PER2,FABP4,ZC3H12A,PER3,ANG,PER1,CCL4,PDE2A,IRF8,PLEK,ATF3,CRY2,WWP1,TGIF1,TGFB3,KLF10,JAK3,ZFP57,BCL6,UXT,BMP4,BMP2,MYC,EDN1,EDNRB,ACER2,BHLHE40,C1QTNF3,BTG2,LOXL2,IGF2BP1,HCLS1,RUNX2,FOXP1,ZBTB16,LAG3,EGR1,STAT3,ANKRD1"
GO: Biological Process	cell projection morphogenesis	2.03E-02	8.84E-02	30	766	"FGF13,SEMA3F,S100A6,FRZB,UCHL1,COL5A1,IGF1R,COL3A1,FZD2,TYROBP,TNFRSF12A,TGFB2,SPON2,SSH3,NR4A3,ITGB3,ITGAV,FZD7,DYNLT1,CACNB3,NBL1,FZD5,FOXP1,KANK1,LAMA2,PDLIM5,RAC2,SPP1,CDH11,NGF"
GO: Biological Process	alpha-beta T cell differentiation involved in immune response	2.06E-02	8.96E-02	4	40	"IL4R,RELB,JAK3,BCL6"
GO: Biological Process	oligosaccharide metabolic process	2.06E-02	8.96E-02	4	40	"MAN2A1,GAL3ST3,GM2A,B4GALT1"
GO: Biological Process	regulation of cell killing	2.07E-02	9.02E-02	5	60	"F2RL1,HLA-B,BCL2L11,ICAM1,LAG3"
GO: Biological Process	phosphatidylinositol-mediated signaling	2.10E-02	9.12E-02	11	206	"NR4A1,PIK3IP1,F2RL1,F2R,IGF1R,TGFB2,KDR,EDN1,HCLS1,IRS2,NGF"
GO: Biological Process	regulation of myeloid leukocyte differentiation	2.11E-02	9.14E-02	7	105	"TYROBP,FOS,KLF10,ITGB3,FSTL3,MYC,HCLS1"
GO: Biological Process	regulation of cytokine secretion	2.11E-02	9.14E-02	7	105	"NLRP1,F2RL1,F2R,IL4R,LRRC32,CLEC4M,C1QTNF3"
GO: Biological Process	osteoclast differentiation	2.11E-02	9.14E-02	6	82	"TYROBP,FOS,KLF10,JUNB,ITGB3,FSTL3"
GO: Biological Process	glucose catabolic process	2.11E-02	9.14E-02	6	82	"IER3,PGD,MYC,H6PD,ENO3,STAT3"
GO: Biological Process	regulation of purine nucleotide metabolic process	2.12E-02	9.16E-02	20	462	"ABCA1,DOCK4,ADM,ELMOD1,PECAM1,FZD2,PDE2A,ICAM1,TNNT2,GNAL,BCL6,RAMP2,DYNLT1,MYC,EDN1,EDNRB,ECE1,ERRFI1,AKAP12,EPHA1"
GO: Biological Process	cytoskeleton organization	2.13E-02	9.22E-02	35	928	"FSCN1,FGF13,TRPV4,CNN1,NEK6,F2RL1,WAS,LIMCH1,ANG,PECAM1,CORO1A,CCL2,PLEK,KCTD13,INF2,ICAM1,TNNT2,SSH3,BCL6,UXT,DIAPH1,PAM,DYNLT1,CAPG,EDN1,TAGLN,HCLS1,FOXP1,LCP1,EPHA1,KANK1,ELN,RAC2,CXCL1,ANKRD1"
GO: Biological Process	inositol lipid-mediated signaling	2.17E-02	9.32E-02	11	207	"NR4A1,PIK3IP1,F2RL1,F2R,IGF1R,TGFB2,KDR,EDN1,HCLS1,IRS2,NGF"
GO: Biological Process	regulation of intracellular protein transport	2.17E-02	9.32E-02	11	207	"TLR7,PDE2A,TGFB3,BMP4,FZD7,PTGS2,LITAF,C1QTNF3,HCLS1,LCP1,KANK1"
GO: Biological Process	regulation of neutrophil chemotaxis	2.18E-02	9.32E-02	3	23	"SELL,EDN1,CD74"
GO: Biological Process	embryonic placenta morphogenesis	2.18E-02	9.32E-02	3	23	"ADM,SOCS3,FZD5"
GO: Biological Process	positive regulation of response to cytokine stimulus	2.18E-02	9.32E-02	3	23	"NLRC5,EDN1,CD74"
GO: Biological Process	activation of innate immune response	2.20E-02	9.32E-02	10	181	"F2RL1,LY96,IRAK3,TLR7,CTSS,FOS,CTSK,TNFAIP3,LRRC32,RFTN1"
GO: Biological Process	protein complex subunit organization	2.21E-02	9.32E-02	50	1421	"FSCN1,FGF13,TRPV4,HMOX1,COL1A1,CLU,NEK6,F2RL1,WAS,HLA-DMA,ALOX5AP,ANG,MBL2,BCL2L11,FBLIM1,IRAK3,IGF1R,PECAM1,CORO1A,FAS,MGST1,IRF8,ANGPT4,PLEK,RPL29,KCTD12,DCTPP1,KCTD13,RPS20,RPS27,ICAM1,TGM2,TNFAIP3,TNNT2,SSH3,DIAPH1,KCTD9,PAM,CAPG,HIST1H1C,C1QTNF3,C1QTNF7,HCLS1,LCP1,EPHA1,KANK1,GPX3,ELN,LCN2,CD74"
GO: Biological Process	bone trabecula formation	2.21E-02	9.32E-02	2	9	"FBN2,COL1A1"
GO: Biological Process	norepinephrine metabolic process	2.21E-02	9.32E-02	2	9	"LY6E,EPAS1"
GO: Biological Process	negative regulation of chemokine production	2.21E-02	9.32E-02	2	9	"F2RL1,C1QTNF3"
GO: Biological Process	diterpenoid biosynthetic process	2.21E-02	9.32E-02	2	9	"ALDH1A2,RDH10"
GO: Biological Process	mature B cell differentiation involved in immune response	2.21E-02	9.32E-02	2	9	"TNFAIP3,LGALS1"
GO: Biological Process	interleukin-8 secretion	2.21E-02	9.32E-02	2	9	"F2RL1,F2R"
GO: Biological Process	regulation of integrin activation	2.21E-02	9.32E-02	2	9	"FBLIM1,PLEK"
GO: Biological Process	regulation of killing of cells of other organism	2.21E-02	9.32E-02	2	9	"F2RL1,BCL2L11"
GO: Biological Process	"antigen processing and presentation of exogenous peptide antigen via MHC class I, TAP-independent"	2.21E-02	9.32E-02	2	9	"HLA-B,CTSS"
GO: Biological Process	regulation of plasminogen activation	2.21E-02	9.32E-02	2	9	"THBS1,SERPINE1"
GO: Biological Process	heart induction	2.21E-02	9.32E-02	2	9	"BMP4,BMP2"
GO: Biological Process	regulation of chemokine secretion	2.21E-02	9.32E-02	2	9	"F2RL1,IL4R"
GO: Biological Process	plasma membrane long-chain fatty acid transport	2.21E-02	9.32E-02	2	9	"THBS1,IRS2"
GO: Biological Process	phospholipid homeostasis	2.21E-02	9.32E-02	2	9	"ABCA1,ABCG1"
GO: Biological Process	chemokine secretion	2.21E-02	9.32E-02	2	9	"F2RL1,IL4R"
GO: Biological Process	positive regulation of myeloid leukocyte cytokine production involved in immune response	2.21E-02	9.32E-02	2	9	"FCER1G,CD74"
GO: Biological Process	negative regulation of phosphoprotein phosphatase activity	2.21E-02	9.32E-02	2	9	"FKBP1B,CRY2"
GO: Biological Process	detection of molecule of bacterial origin	2.21E-02	9.32E-02	2	9	"LY96,ITGAV"
GO: Biological Process	positive regulation of protein homooligomerization	2.21E-02	9.32E-02	2	9	"BCL2L11,FAS"
GO: Biological Process	negative regulation of cell adhesion mediated by integrin	2.21E-02	9.32E-02	2	9	"SERPINE1,ACER2"
GO: Biological Process	regulation of extent of cell growth	2.21E-02	9.33E-02	5	61	"FGF13,SEMA3F,TNFRSF12A,SPP1,NGF"
GO: Biological Process	peripheral nervous system development	2.23E-02	9.37E-02	6	83	"HOXD10,PMP22,ADAM22,ZFP57,EDNRB,NGF"
GO: Biological Process	positive regulation of cyclic nucleotide biosynthetic process	2.23E-02	9.37E-02	6	83	"ABCA1,ADM,GNAL,RAMP2,ECE1,AKAP12"
GO: Biological Process	establishment of cell polarity	2.23E-02	9.37E-02	6	83	"FGF13,IGF1R,CYTH1,DYNLT1,KANK1,CDH5"
GO: Biological Process	regulation of stem cell proliferation	2.23E-02	9.37E-02	6	83	"KDR,BMP4,MYC,FOXP1,IRS2,NGF"
GO: Biological Process	T cell differentiation involved in immune response	2.24E-02	9.38E-02	4	41	"IL4R,RELB,JAK3,BCL6"
GO: Biological Process	alpha-beta T cell activation involved in immune response	2.24E-02	9.38E-02	4	41	"IL4R,RELB,JAK3,BCL6"
GO: Biological Process	cellular response to organonitrogen compound	2.24E-02	9.38E-02	19	435	"PPARG,CEBPB,COL1A1,PRKAR2B,SOCS3,IGF1R,COL3A1,PDE2A,PDE4B,MMP3,ICAM1,GHR,JAK3,DIAPH1,PTGS2,IRS2,KANK1,EGR1,STAT3"
GO: Biological Process	modification of morphology or physiology of other organism	2.26E-02	9.47E-02	18	406	"F2RL1,HLA-B,CLDN1,MBL2,BCL2L11,TLR7,CCL4,WWP1,ICAM1,KDR,CLEC4M,ITGB3,ITGAV,DYNLT1,MYC,CD4,ZYX,STAT3"
GO: Biological Process	positive regulation of ERK1 and ERK2 cascade	2.31E-02	9.53E-02	7	107	"F2RL1,F2R,KDR,BMP4,BMP2,C1QTNF3,CD74"
GO: Biological Process	cell killing	2.31E-02	9.53E-02	7	107	"F2RL1,HLA-B,MBL2,BCL2L11,CTSH,ICAM1,LAG3"
GO: Biological Process	regulation of cell projection organization	2.33E-02	9.53E-02	16	349	"FGF13,TRPV4,PMP22,SEMA3F,F2RL1,TNFRSF12A,TGFB3,SSH3,IL15RA,KANK1,LGALS1,PDLIM5,LCN2,SPP1,NGF,ANKRD1"
GO: Biological Process	osteoblast differentiation	2.35E-02	9.53E-02	9	157	"FBN2,CEBPB,COL1A1,IL6R,JUNB,BMP4,BMP2,RUNX2,SPP1"
GO: Biological Process	sequestering of calcium ion	2.35E-02	9.53E-02	6	84	"FKBP1B,F2R,TGFB2,ITGAV,DIAPH1,GSTO1"
GO: Biological Process	epithelial to mesenchymal transition	2.35E-02	9.53E-02	6	84	"AGER,COL1A1,TGFB2,TGFB3,BMP2,LOXL2"
GO: Biological Process	response to estradiol	2.35E-02	9.53E-02	6	84	"ALDH1A2,GHR,RAMP2,PAM,PTGS2,STAT3"
GO: Biological Process	regulation of osteoclast differentiation	2.36E-02	9.53E-02	5	62	"TYROBP,FOS,KLF10,ITGB3,FSTL3"
GO: Biological Process	positive regulation of JAK-STAT cascade	2.36E-02	9.53E-02	5	62	"F2R,IL6R,PECAM1,GHR,HCLS1"
GO: Biological Process	establishment or maintenance of cell polarity	2.37E-02	9.53E-02	8	132	"FGF13,IGF1R,CCL4,CYTH1,DYNLT1,KANK1,SPN,CDH5"
GO: Biological Process	regulation of nucleotide metabolic process	2.39E-02	9.53E-02	20	468	"ABCA1,DOCK4,ADM,ELMOD1,PECAM1,FZD2,PDE2A,ICAM1,TNNT2,GNAL,BCL6,RAMP2,DYNLT1,MYC,EDN1,EDNRB,ECE1,ERRFI1,AKAP12,EPHA1"
GO: Biological Process	lipoprotein metabolic process	2.42E-02	9.53E-02	7	108	"ABCA1,HSPG2,ITGB3,ITGAV,APOLD1,ABCG1,CD4"
GO: Biological Process	regulation of cell adhesion mediated by integrin	2.42E-02	9.53E-02	4	42	"PLAU,TGFB2,SERPINE1,ACER2"
GO: Biological Process	regulation of bone remodeling	2.42E-02	9.53E-02	4	42	"TNFAIP3,ITGB3,ITGAV,SPP1"
GO: Biological Process	hindlimb morphogenesis	2.42E-02	9.53E-02	4	42	"HOXD10,BMP4,ZBTB16,AFF3"
GO: Biological Process	negative regulation of cell growth	2.43E-02	9.53E-02	9	158	"PPARG,FGF13,CDKN2C,SEMA3F,FRZB,TGFB2,RERG,BCL6,SPP1"
GO: Biological Process	pyrimidine ribonucleoside biosynthetic process	2.44E-02	9.53E-02	3	24	"UMPS,CTPS1,CMPK1"
GO: Biological Process	positive regulation of collagen biosynthetic process	2.44E-02	9.53E-02	3	24	"F2R,TGFB3,BMP4"
GO: Biological Process	retinoic acid metabolic process	2.44E-02	9.53E-02	3	24	"ALDH1A2,CYP26B1,RDH10"
GO: Biological Process	regulation of vascular endothelial growth factor production	2.44E-02	9.53E-02	3	24	"CCL2,PTGS2,SULF1"
GO: Biological Process	homeostasis of number of cells within a tissue	2.44E-02	9.53E-02	3	24	"F2R,COL14A1,CORO1A"
GO: Biological Process	regulation of protein oligomerization	2.44E-02	9.53E-02	3	24	"CLU,BCL2L11,FAS"
GO: Biological Process	skeletal muscle tissue regeneration	2.44E-02	9.53E-02	3	24	"PLAU,FZD7,ENO3"
GO: Biological Process	middle ear morphogenesis	2.44E-02	9.53E-02	3	24	"MYC,EDN1,NAGLU"
GO: Biological Process	negative regulation of leukocyte mediated immunity	2.44E-02	9.53E-02	3	24	"HLA-B,JAK3,SPN"
GO: Biological Process	tyrosine phosphorylation of Stat5 protein	2.44E-02	9.53E-02	3	24	"PECAM1,GHR,JAK3"
GO: Biological Process	regulation of Ras protein signal transduction	2.49E-02	9.53E-02	16	352	"ABCA1,DOCK4,F2RL1,F2R,COL3A1,PECAM1,KCTD13,ICAM1,CYTH1,GPR56,BCL6,SSX2IP,DYNLT1,ERRFI1,EPHA1,KANK1"
GO: Biological Process	ovarian follicle development	2.51E-02	9.53E-02	5	63	"ANG,ICAM1,KDR,BMP4,LFNG"
GO: Biological Process	positive regulation of cytokine biosynthetic process	2.51E-02	9.53E-02	5	63	"HMOX1,TLR7,THBS1,CD4,SPN"
GO: Biological Process	sensory perception of pain	2.53E-02	9.53E-02	7	109	"F2R,UCHL1,CTSS,EDN1,EDNRB,PTGS2,NGF"
GO: Biological Process	heart morphogenesis	2.53E-02	9.53E-02	11	212	"ALDH1A2,COL5A1,FZD2,TGFB2,FAT4,THBS1,TNNT2,BMP4,BMP2,LY6E,ANKRD1"
GO: Biological Process	developmental growth	2.54E-02	9.53E-02	15	324	"FGF13,ADM,SEMA3F,COL14A1,TNFRSF12A,PLAU,RDH10,THBS1,BMP4,FZD7,PTGS2,FOXP1,ENO3,SPP1,NGF"
GO: Biological Process	response to endoplasmic reticulum stress	2.57E-02	9.53E-02	8	134	"CEBPB,FAM129A,BCL2L11,PPP1R15A,CCL2,ATF3,KDELR3,THBS1"
GO: Biological Process	cell part morphogenesis	2.59E-02	9.53E-02	30	782	"FGF13,SEMA3F,S100A6,FRZB,UCHL1,COL5A1,IGF1R,COL3A1,FZD2,TYROBP,TNFRSF12A,TGFB2,SPON2,SSH3,NR4A3,ITGB3,ITGAV,FZD7,DYNLT1,CACNB3,NBL1,FZD5,FOXP1,KANK1,LAMA2,PDLIM5,RAC2,SPP1,CDH11,NGF"
GO: Biological Process	amide transport	2.59E-02	9.53E-02	13	268	"ABCA1,PPARG,TRPV4,FKBP1B,PRKAR2B,MTNR1B,SLC15A3,HMGN3,CLEC4M,EDN1,IRS2,NNAT,CD74"
GO: Biological Process	tube morphogenesis	2.61E-02	9.53E-02	16	354	"ADM,ALDH1A2,BCL2L11,FZD2,CTSH,RDH10,TGM2,TGIF1,FAT4,KDR,NR4A3,BMP4,BMP2,B4GALT1,MYC,EDN1"
GO: Biological Process	regulation of smooth muscle cell migration	2.62E-02	9.53E-02	4	43	"AGER,IGFBP3,PLAU,SERPINE1"
GO: Biological Process	substrate adhesion-dependent cell spreading	2.62E-02	9.53E-02	4	43	"FN1,FZD7,EPHA1,KANK1"
GO: Biological Process	response to gamma radiation	2.62E-02	9.53E-02	4	43	"CCL2,CXCL10,MYC,EGR1"
GO: Biological Process	NF-kappaB import into nucleus	2.62E-02	9.53E-02	4	43	"TLR7,PTGS2,LITAF,C1QTNF3"
GO: Biological Process	embryo implantation	2.62E-02	9.53E-02	4	43	"RPL29,TIMP1,PTGS2,SPP1"
GO: Biological Process	regulation of systemic arterial blood pressure by hormone	2.62E-02	9.53E-02	4	43	"F2RL1,F2R,EDN1,ECE1"
GO: Biological Process	positive regulation of interleukin-6 production	2.62E-02	9.53E-02	4	43	"FCER1G,FIGF,IL6R,TLR7"
GO: Biological Process	striated muscle hypertrophy	2.62E-02	9.53E-02	4	43	"COL14A1,KLF15,EDN1,ECE1"
GO: Biological Process	regulation of NF-kappaB import into nucleus	2.62E-02	9.53E-02	4	43	"TLR7,PTGS2,LITAF,C1QTNF3"
GO: Biological Process	cardiac muscle hypertrophy	2.62E-02	9.53E-02	4	43	"COL14A1,KLF15,EDN1,ECE1"
GO: Biological Process	entry of symbiont into host cell by promotion of host phagocytosis	2.64E-02	9.53E-02	1	1	ITGAV
GO: Biological Process	positive regulation of macrophage tolerance induction	2.64E-02	9.53E-02	1	1	IRAK3
GO: Biological Process	regulation of granuloma formation	2.64E-02	9.53E-02	1	1	TNFAIP3
GO: Biological Process	specification of ureteric bud anterior/posterior symmetry	2.64E-02	9.53E-02	1	1	BMP4
GO: Biological Process	modulation by symbiont of host phagocytosis	2.64E-02	9.53E-02	1	1	ITGAV
GO: Biological Process	regulation of metanephric comma-shaped body morphogenesis	2.64E-02	9.53E-02	1	1	BMP4
GO: Biological Process	miRNA loading onto RISC involved in gene silencing by miRNA	2.64E-02	9.53E-02	1	1	TARBP2
GO: Biological Process	negative regulation of antigen processing and presentation of peptide or polysaccharide antigen via MHC class II	2.64E-02	9.53E-02	1	1	THBS1
GO: Biological Process	negative regulation of nucleotide-binding oligomerization domain containing signaling pathway	2.64E-02	9.53E-02	1	1	TNFAIP3
GO: Biological Process	positive regulation of chylomicron remodeling	2.64E-02	9.53E-02	1	1	GPIHBP1
GO: Biological Process	cellular lactam catabolic process	2.64E-02	9.53E-02	1	1	DPEP1
GO: Biological Process	apolipoprotein A-I-mediated signaling pathway	2.64E-02	9.53E-02	1	1	ABCA1
GO: Biological Process	positive regulation of inositol-polyphosphate 5-phosphatase activity	2.64E-02	9.53E-02	1	1	PLEK
GO: Biological Process	negative regulation of lymphocyte chemotaxis	2.64E-02	9.53E-02	1	1	CCL2
GO: Biological Process	"regulation of DNA damage response, signal transduction by p53 class mediator resulting in transcription of p21 class mediator"	2.64E-02	9.53E-02	1	1	ZNF385A
GO: Biological Process	anterior/posterior pattern specification involved in ureteric bud development	2.64E-02	9.53E-02	1	1	BMP4
GO: Biological Process	negative regulation of hepatocyte differentiation	2.64E-02	9.53E-02	1	1	FRZB
GO: Biological Process	renal system segmentation	2.64E-02	9.53E-02	1	1	BMP4
GO: Biological Process	negative regulation of inositol phosphate biosynthetic process	2.64E-02	9.53E-02	1	1	PLEK
GO: Biological Process	inactivation of MAPKK activity	2.64E-02	9.53E-02	1	1	IGF1R
GO: Biological Process	regulation of chylomicron remodeling	2.64E-02	9.53E-02	1	1	GPIHBP1
GO: Biological Process	regulation of metanephric cap mesenchymal cell proliferation	2.64E-02	9.53E-02	1	1	MYC
GO: Biological Process	T cell antigen processing and presentation	2.64E-02	9.53E-02	1	1	ICAM1
GO: Biological Process	negative regulation of chemokine secretion	2.64E-02	9.53E-02	1	1	F2RL1
GO: Biological Process	negative regulation of nucleotide-binding oligomerization domain containing 2 signaling pathway	2.64E-02	9.53E-02	1	1	TNFAIP3
GO: Biological Process	positive regulation by organism of phagocytosis in other organism involved in symbiotic interaction	2.64E-02	9.53E-02	1	1	ITGAV
GO: Biological Process	positive regulation of fibroblast growth factor production	2.64E-02	9.53E-02	1	1	PTGS2
GO: Biological Process	cortical microtubule organization	2.64E-02	9.53E-02	1	1	TRPV4
GO: Biological Process	pyrimidine ribonucleoside diphosphate catabolic process	2.64E-02	9.53E-02	1	1	ENTPD4
GO: Biological Process	negative regulation of FasL biosynthetic process	2.64E-02	9.53E-02	1	1	JAK3
GO: Biological Process	phospholipase C-inhibiting G-protein coupled receptor signaling pathway	2.64E-02	9.53E-02	1	1	PLEK
GO: Biological Process	negative regulation of the force of heart contraction involved in baroreceptor response to increased systemic arterial blood pressure	2.64E-02	9.53E-02	1	1	ADRA1D
GO: Biological Process	specification of ureteric bud anterior/posterior symmetry by BMP signaling pathway	2.64E-02	9.53E-02	1	1	BMP4
GO: Biological Process	endothelin maturation	2.64E-02	9.53E-02	1	1	ECE1
GO: Biological Process	erythrocyte aggregation	2.64E-02	9.53E-02	1	1	LGALS1
GO: Biological Process	regulation of cell diameter	2.64E-02	9.53E-02	1	1	PLEK
GO: Biological Process	positive regulation of neutrophil mediated killing of gram-negative bacterium	2.64E-02	9.53E-02	1	1	F2RL1
GO: Biological Process	negative regulation of calcium-independent cell-cell adhesion	2.64E-02	9.53E-02	1	1	BMP2
GO: Biological Process	chemokine (C-C motif) ligand 2 secretion	2.64E-02	9.53E-02	1	1	F2RL1
GO: Biological Process	enteric smooth muscle cell differentiation	2.64E-02	9.53E-02	1	1	EDNRB
GO: Biological Process	regulation of chylomicron remnant clearance	2.64E-02	9.53E-02	1	1	GPIHBP1
GO: Biological Process	regulation of mRNA stability involved in response to stress	2.64E-02	9.53E-02	1	1	IGF2BP1
GO: Biological Process	microtubule-dependent intracellular transport of viral material	2.64E-02	9.53E-02	1	1	DYNLT1
GO: Biological Process	dCDP metabolic process	2.64E-02	9.53E-02	1	1	CMPK1
GO: Biological Process	toll-like receptor 11 signaling pathway	2.64E-02	9.53E-02	1	1	LRRC32
GO: Biological Process	regulation of cardiac muscle fiber development	2.64E-02	9.53E-02	1	1	BMP4
GO: Biological Process	negative regulation of heat generation	2.64E-02	9.53E-02	1	1	ARRDC3
GO: Biological Process	transport of viral material towards nucleus	2.64E-02	9.53E-02	1	1	DYNLT1
GO: Biological Process	entry of bacterium into host cell	2.64E-02	9.53E-02	1	1	ITGAV
GO: Biological Process	positive regulation of skeletal muscle contraction by regulation of release of sequestered calcium ion	2.64E-02	9.53E-02	1	1	GSTO1
GO: Biological Process	intermediate mesoderm formation	2.64E-02	9.53E-02	1	1	BMP4
GO: Biological Process	detection of hormone stimulus	2.64E-02	9.53E-02	1	1	ABCG1
GO: Biological Process	negative regulation of cGMP-mediated signaling	2.64E-02	9.53E-02	1	1	THBS1
GO: Biological Process	ectodermal cell fate specification	2.64E-02	9.53E-02	1	1	FZD7
GO: Biological Process	flavin adenine dinucleotide biosynthetic process	2.64E-02	9.53E-02	1	1	FLAD1
GO: Biological Process	lysobisphosphatidic acid metabolic process	2.64E-02	9.53E-02	1	1	ACP6
GO: Biological Process	extracellular amino acid transport	2.64E-02	9.53E-02	1	1	SLC1A5
GO: Biological Process	entry of organism into cell of other organism by promotion of phagocytosis in other organism involved in symbiotic interaction	2.64E-02	9.53E-02	1	1	ITGAV
GO: Biological Process	dCDP biosynthetic process	2.64E-02	9.53E-02	1	1	CMPK1
GO: Biological Process	positive regulation of glomerular metanephric mesangial cell proliferation	2.64E-02	9.53E-02	1	1	EGR1
GO: Biological Process	negative regulation of cell proliferation involved in heart morphogenesis	2.64E-02	9.53E-02	1	1	BMP4
GO: Biological Process	positive regulation by symbiont of host phagocytosis	2.64E-02	9.53E-02	1	1	ITGAV
GO: Biological Process	negative regulation of glomerulus development	2.64E-02	9.53E-02	1	1	BMP4
GO: Biological Process	ureter epithelial cell differentiation	2.64E-02	9.53E-02	1	1	BMP4
GO: Biological Process	positive regulation of cardiac muscle fiber development	2.64E-02	9.53E-02	1	1	BMP4
GO: Biological Process	BMP signaling pathway involved in ureter morphogenesis	2.64E-02	9.53E-02	1	1	BMP4
GO: Biological Process	pulmonary artery endothelial tube morphogenesis	2.64E-02	9.53E-02	1	1	BMP4
GO: Biological Process	negative regulation of renin secretion into blood stream	2.64E-02	9.53E-02	1	1	F2R
GO: Biological Process	negative regulation of metanephric S-shaped body morphogenesis	2.64E-02	9.53E-02	1	1	BMP4
GO: Biological Process	negative regulation of locomotion involved in locomotory behavior	2.64E-02	9.53E-02	1	1	ARRDC3
GO: Biological Process	macrophage migration inhibitory factor signaling pathway	2.64E-02	9.53E-02	1	1	CD74
GO: Biological Process	FAD metabolic process	2.64E-02	9.53E-02	1	1	FLAD1
GO: Biological Process	CDP metabolic process	2.64E-02	9.53E-02	1	1	CMPK1
GO: Biological Process	lactic acid secretion	2.64E-02	9.53E-02	1	1	MYC
GO: Biological Process	osmosensory signaling pathway	2.64E-02	9.53E-02	1	1	TRPV4
GO: Biological Process	positive regulation of erythrocyte aggregation	2.64E-02	9.53E-02	1	1	LGALS1
GO: Biological Process	response to antipsychotic drug	2.64E-02	9.53E-02	1	1	PRKAR2B
GO: Biological Process	microtubule-dependent intracellular transport of viral material towards nucleus	2.64E-02	9.53E-02	1	1	DYNLT1
GO: Biological Process	pyrimidine nucleoside diphosphate catabolic process	2.64E-02	9.53E-02	1	1	ENTPD4
GO: Biological Process	negative regulation of toll-like receptor 5 signaling pathway	2.64E-02	9.53E-02	1	1	TNFAIP3
GO: Biological Process	bud dilation involved in lung branching	2.64E-02	9.53E-02	1	1	BMP4
GO: Biological Process	negative regulation of nucleotide-binding oligomerization domain containing 1 signaling pathway	2.64E-02	9.53E-02	1	1	TNFAIP3
GO: Biological Process	negative regulation of dendritic cell antigen processing and presentation	2.64E-02	9.53E-02	1	1	THBS1
GO: Biological Process	regulation of ectodermal cell fate specification	2.64E-02	9.53E-02	1	1	FZD7
GO: Biological Process	negative regulation of mesenchymal cell proliferation involved in ureter development	2.64E-02	9.53E-02	1	1	BMP4
GO: Biological Process	negative regulation of collateral sprouting of intact axon in response to injury	2.64E-02	9.53E-02	1	1	SPP1
GO: Biological Process	protein amidation	2.64E-02	9.53E-02	1	1	PAM
GO: Biological Process	CDP biosynthetic process	2.64E-02	9.53E-02	1	1	CMPK1
GO: Biological Process	regulation of transcription from RNA polymerase II promoter involved in kidney development	2.64E-02	9.53E-02	1	1	BMP4
GO: Biological Process	positive regulation of metanephric cap mesenchymal cell proliferation	2.64E-02	9.53E-02	1	1	MYC
GO: Biological Process	spermidine acetylation	2.64E-02	9.53E-02	1	1	SAT1
GO: Biological Process	negative regulation of metanephric comma-shaped body morphogenesis	2.64E-02	9.53E-02	1	1	BMP4
GO: Biological Process	response to vitamin B3	2.64E-02	9.53E-02	1	1	CCL2
GO: Biological Process	regulation of toll-like receptor 5 signaling pathway	2.64E-02	9.53E-02	1	1	TNFAIP3
GO: Biological Process	FAD biosynthetic process	2.64E-02	9.53E-02	1	1	FLAD1
GO: Biological Process	sodium-dependent organic anion transport	2.64E-02	9.53E-02	1	1	SLC10A6
GO: Biological Process	response to sulfur dioxide	2.64E-02	9.53E-02	1	1	ICAM1
GO: Biological Process	positive regulation of Wnt signaling pathway by BMP signaling pathway	2.64E-02	9.53E-02	1	1	BMP2
GO: Biological Process	regulation of FasL biosynthetic process	2.64E-02	9.53E-02	1	1	JAK3
GO: Biological Process	BMP signaling pathway involved in nephric duct formation	2.64E-02	9.53E-02	1	1	BMP4
GO: Biological Process	"positive regulation of DNA damage response, signal transduction by p53 class mediator resulting in transcription of p21 class mediator"	2.64E-02	9.53E-02	1	1	ZNF385A
GO: Biological Process	BMP signaling pathway involved in renal system segmentation	2.64E-02	9.53E-02	1	1	BMP4
GO: Biological Process	regulation of erythrocyte aggregation	2.64E-02	9.53E-02	1	1	LGALS1
GO: Biological Process	fluorene metabolic process	2.64E-02	9.53E-02	1	1	CYP4B1
GO: Biological Process	regulation of entry of bacterium into host cell	2.64E-02	9.53E-02	1	1	ITGAV
GO: Biological Process	photoreactive repair	2.64E-02	9.53E-02	1	1	CRY2
GO: Biological Process	negative regulation of branch elongation involved in ureteric bud branching by BMP signaling pathway	2.64E-02	9.53E-02	1	1	BMP4
GO: Biological Process	negative regulation of branch elongation involved in ureteric bud branching	2.64E-02	9.53E-02	1	1	BMP4
GO: Biological Process	protein kinase C deactivation	2.64E-02	9.53E-02	1	1	EDN1
GO: Biological Process	negative regulation of entry of bacterium into host cell	2.64E-02	9.53E-02	1	1	ITGAV
GO: Biological Process	positive regulation of neutrophil mediated cytotoxicity	2.64E-02	9.53E-02	1	1	F2RL1
GO: Biological Process	positive regulation of neutrophil mediated killing of symbiont cell	2.64E-02	9.53E-02	1	1	F2RL1
GO: Biological Process	protein palmitoleylation	2.64E-02	9.53E-02	1	1	CD4
GO: Biological Process	calcitonin catabolic process	2.64E-02	9.53E-02	1	1	ECE1
GO: Biological Process	negative regulation of vascular wound healing	2.64E-02	9.53E-02	1	1	SERPINE1
GO: Biological Process	regulation of metanephric S-shaped body morphogenesis	2.64E-02	9.53E-02	1	1	BMP4
GO: Biological Process	negative regulation of natural killer cell chemotaxis	2.64E-02	9.53E-02	1	1	CCL2
GO: Biological Process	negative regulation of granuloma formation	2.64E-02	9.53E-02	1	1	TNFAIP3
GO: Biological Process	positive regulation of eosinophil degranulation	2.64E-02	9.53E-02	1	1	F2RL1
GO: Biological Process	UDP catabolic process	2.64E-02	9.53E-02	1	1	ENTPD4
GO: Biological Process	regulation of inositol-polyphosphate 5-phosphatase activity	2.64E-02	9.53E-02	1	1	PLEK
GO: Biological Process	regulation of macrophage tolerance induction	2.64E-02	9.53E-02	1	1	IRAK3
GO: Biological Process	positive regulation of chylomicron remnant clearance	2.64E-02	9.53E-02	1	1	GPIHBP1
GO: Biological Process	positive regulation of neutrophil mediated killing of bacterium	2.64E-02	9.53E-02	1	1	F2RL1
GO: Biological Process	pyrimidine ribonucleoside diphosphate biosynthetic process	2.64E-02	9.53E-02	1	1	CMPK1
GO: Biological Process	UDP biosynthetic process	2.64E-02	9.53E-02	1	1	CMPK1
GO: Biological Process	negative regulation of protein glycosylation in Golgi	2.64E-02	9.53E-02	1	1	ACER2
GO: Biological Process	intermediate mesodermal cell differentiation	2.64E-02	9.53E-02	1	1	BMP4
GO: Biological Process	negative regulation of ectodermal cell fate specification	2.64E-02	9.53E-02	1	1	FZD7
GO: Biological Process	positive regulation of leukotriene production involved in inflammatory response	2.64E-02	9.53E-02	1	1	SERPINE1
GO: Biological Process	modulation of phagocytosis in other organism involved in symbiotic interaction	2.64E-02	9.53E-02	1	1	ITGAV
GO: Biological Process	polyamine acetylation	2.64E-02	9.53E-02	1	1	SAT1
GO: Biological Process	cellular response to lipid hydroperoxide	2.64E-02	9.53E-02	1	1	MGST1
GO: Biological Process	negative regulation of CD40 signaling pathway	2.64E-02	9.53E-02	1	1	TNFAIP3
GO: Biological Process	macrophage tolerance induction	2.64E-02	9.53E-02	1	1	IRAK3
GO: Biological Process	regulation of leukotriene production involved in inflammatory response	2.64E-02	9.53E-02	1	1	SERPINE1
GO: Biological Process	intermediate mesoderm morphogenesis	2.64E-02	9.53E-02	1	1	BMP4
GO: Biological Process	induction by virus of host cell-cell fusion	2.64E-02	9.53E-02	1	1	CD4
GO: Biological Process	substance P catabolic process	2.64E-02	9.53E-02	1	1	ECE1
GO: Biological Process	positive regulation of activation-induced cell death of T cells	2.64E-02	9.53E-02	1	1	TGFB2
GO: Biological Process	pyrimidine ribonucleotide catabolic process	2.64E-02	9.53E-02	1	1	ENTPD4
GO: Biological Process	erythrocyte homeostasis	2.64E-02	9.54E-02	7	110	"HOXB6,HMOX1,TIMP1,BCL6,BMP4,HCLS1,EPAS1"
GO: Biological Process	blood vessel endothelial cell migration	2.66E-02	9.54E-02	5	64	"NR4A1,ANGPT4,THBS1,KDR,PTGS2"
GO: Biological Process	positive regulation of stem cell proliferation	2.66E-02	9.54E-02	5	64	"KDR,MYC,FOXP1,IRS2,NGF"
GO: Biological Process	muscle adaptation	2.66E-02	9.54E-02	5	64	"HMOX1,COL14A1,KLF15,EDN1,ECE1"
GO: Biological Process	response to glucose	2.67E-02	9.54E-02	8	135	"FKBP1B,ICAM1,THBS1,HMGN3,IRS2,LGALS1,NNAT,EGR1"
GO: Biological Process	establishment of protein localization to organelle	2.69E-02	9.54E-02	20	474	"F2R,BCL2L11,TLR7,PDE2A,RPL29,CRY2,RPS20,RPS27,TGFB2,TGFB3,JAK3,BCL6,BMP4,FZD7,PTGS2,LITAF,C1QTNF3,HCLS1,KANK1,STAT3"
GO: Biological Process	glucose homeostasis	2.71E-02	9.54E-02	9	161	"PPARG,GPR116,FKBP1B,MTNR1B,ICAM1,HMGN3,C1QTNF3,LGALS1,STAT3"
GO: Biological Process	carbohydrate homeostasis	2.71E-02	9.54E-02	9	161	"PPARG,GPR116,FKBP1B,MTNR1B,ICAM1,HMGN3,C1QTNF3,LGALS1,STAT3"
GO: Biological Process	regulation of organ morphogenesis	2.71E-02	9.54E-02	9	161	"FZD2,PLAU,TNFAIP3,BMP4,BMP2,MYC,EDN1,RUNX2,SULF1"
GO: Biological Process	intracellular cholesterol transport	2.71E-02	9.54E-02	2	10	"ABCA1,ABCG1"
GO: Biological Process	interleukin-6-mediated signaling pathway	2.71E-02	9.54E-02	2	10	"IL6R,STAT3"
GO: Biological Process	regulation of fever generation	2.71E-02	9.54E-02	2	10	"EDNRB,PTGS2"
GO: Biological Process	STAT protein import into nucleus	2.71E-02	9.54E-02	2	10	"F2R,JAK3"
GO: Biological Process	cranial suture morphogenesis	2.71E-02	9.54E-02	2	10	"TGFB3,BMP4"
GO: Biological Process	macrophage activation involved in immune response	2.71E-02	9.54E-02	2	10	"TLR7,TYROBP"
GO: Biological Process	extracellular fibril organization	2.71E-02	9.54E-02	2	10	"COL5A1,COL3A1"
GO: Biological Process	response to nitric oxide	2.71E-02	9.54E-02	2	10	"ITGAV,DPEP1"
GO: Biological Process	regulation of hypersensitivity	2.71E-02	9.54E-02	2	10	"FCER1G,SPN"
GO: Biological Process	regulation of establishment of cell polarity	2.71E-02	9.54E-02	2	10	"KANK1,CDH5"
GO: Biological Process	intracellular sterol transport	2.71E-02	9.54E-02	2	10	"ABCA1,ABCG1"
GO: Biological Process	cellular response to thyroid hormone stimulus	2.71E-02	9.54E-02	2	10	"CTSS,CTSH"
GO: Biological Process	positive regulation of macrophage chemotaxis	2.71E-02	9.54E-02	2	10	"CCL2,THBS1"
GO: Biological Process	telencephalon regionalization	2.71E-02	9.54E-02	2	10	"BMP4,BMP2"
GO: Biological Process	prostatic bud formation	2.71E-02	9.54E-02	2	10	"BMP4,SULF1"
GO: Biological Process	type B pancreatic cell apoptotic process	2.71E-02	9.54E-02	2	10	"AGER,NGF"
GO: Biological Process	positive regulation of fibroblast migration	2.71E-02	9.54E-02	2	10	"AGER,THBS1"
GO: Biological Process	regulation of T-helper 2 cell differentiation	2.71E-02	9.54E-02	2	10	"IL4R,BCL6"
GO: Biological Process	antigen processing and presentation of endogenous antigen	2.71E-02	9.54E-02	2	10	"HLA-B,CD74"
GO: Biological Process	response to muramyl dipeptide	2.71E-02	9.54E-02	2	10	"NLRP1,TNFAIP3"
GO: Biological Process	bronchus development	2.71E-02	9.54E-02	2	10	"BMP4,FOXP1"
GO: Biological Process	neutrophil degranulation	2.71E-02	9.54E-02	2	10	"ANXA3,PRAM1"
GO: Biological Process	regulation of lipoprotein metabolic process	2.71E-02	9.54E-02	2	10	"ITGB3,ITGAV"
GO: Biological Process	negative regulation of ryanodine-sensitive calcium-release channel activity	2.71E-02	9.54E-02	2	10	"FKBP1B,GSTO1"
GO: Biological Process	cell differentiation involved in embryonic placenta development	2.72E-02	9.54E-02	3	25	"SOCS3,ITGAV,FZD5"
GO: Biological Process	positive regulation of collagen metabolic process	2.72E-02	9.54E-02	3	25	"F2R,TGFB3,BMP4"
GO: Biological Process	regulation of glycolysis	2.72E-02	9.54E-02	3	25	"IER3,MYC,STAT3"
GO: Biological Process	macrophage chemotaxis	2.72E-02	9.54E-02	3	25	"CCL2,THBS1,EDNRB"
GO: Biological Process	negative regulation of intrinsic apoptotic signaling pathway in response to DNA damage	2.72E-02	9.54E-02	3	25	"CLU,ZNF385A,CD74"
GO: Biological Process	pyrimidine ribonucleotide biosynthetic process	2.72E-02	9.54E-02	3	25	"UMPS,CTPS1,CMPK1"
GO: Biological Process	superoxide anion generation	2.72E-02	9.54E-02	3	25	"F2RL1,CYBB,EDN1"
GO: Biological Process	positive regulation of smooth muscle contraction	2.72E-02	9.54E-02	3	25	"F2R,EDN1,PTGS2"
GO: Biological Process	regulation of type 2 immune response	2.72E-02	9.54E-02	3	25	"IL4R,BCL6,CD74"
GO: Biological Process	regulation of T-helper cell differentiation	2.72E-02	9.54E-02	3	25	"IL4R,JAK3,BCL6"
GO: Biological Process	protein localization to organelle	2.72E-02	9.54E-02	24	597	"COL1A1,F2R,BCL2L11,TLR7,PDE2A,RPL29,CRY2,KDELR3,RPS20,RPS27,TGFB2,TGFB3,JAK3,BCL6,DIAPH1,BMP4,FZD7,PTGS2,LITAF,C1QTNF3,HCLS1,KANK1,ZBTB16,STAT3"
GO: Biological Process	response to cAMP	2.73E-02	9.56E-02	6	87	"CDO1,COL1A1,PLAT,FOS,JUNB,EGR1"
GO: Biological Process	long-chain fatty acid metabolic process	2.73E-02	9.56E-02	6	87	"SLC27A3,ALOX5AP,CYP1B1,PAM,PTGS2,DPEP1"
GO: Biological Process	regulation of systemic arterial blood pressure	2.73E-02	9.56E-02	6	87	"ADRA1D,IER3,F2RL1,F2R,EDN1,ECE1"
GO: Biological Process	regulation of striated muscle tissue development	2.76E-02	9.63E-02	7	111	"COL14A1,IGFBP3,CYP26B1,MBNL3,BMP4,BMP2,FOXP1"
GO: Biological Process	digestive system development	2.77E-02	9.67E-02	8	136	"ALDH1A2,IGF1R,COL3A1,TGFB2,TGFB3,FAT4,BMP4,EDNRB"
GO: Biological Process	negative regulation of neuron apoptotic process	2.77E-02	9.67E-02	8	136	"CEBPB,HMOX1,F2R,CCL2,TGFB3,NR4A3,BTG2,NGF"
GO: Biological Process	glial cell differentiation	2.80E-02	9.77E-02	9	162	"PPARG,CDKN2C,ADAM22,BMP4,BMP2,KLF15,CD9,EGR1,STAT3"
GO: Biological Process	regulation of interleukin-2 production	2.82E-02	9.82E-02	4	44	"PDE4B,TNFAIP3,CD4,LAG3"
GO: Biological Process	cellular response to amino acid stimulus	2.82E-02	9.82E-02	4	44	"CEBPB,COL1A1,COL3A1,MMP3"
GO: Biological Process	cholesterol homeostasis	2.82E-02	9.82E-02	5	65	"ABCA1,ABCG5,FABP4,GPIHBP1,ABCG1"
GO: Biological Process	B cell activation	2.85E-02	9.92E-02	10	189	"FAS,MNDA,TNFAIP3,JAK3,BCL6,SWAP70,FOXP1,IRS2,LGALS1,CD74"
GO: Biological Process	positive regulation of nucleocytoplasmic transport	2.87E-02	9.98E-02	6	88	"TLR7,TGFB3,BMP4,PTGS2,HCLS1,KANK1"
