# Supplementary material for: Pathogenic pathways are activated in each major cell type of the glomerulus in the Cd2ap mutant mouse model of focal segmental glomerulosclerosis
Source: BMC Nephrol. 2015 May 13;16:71. doi: 10.1186/s12882-015-0063-z (PMC4430919; doi:10.1186/s12882-015-0063-z)
Supplement: Additional file 7: Table S7. — Microarray defined genes upregulated in Cd2ap mutant podocytes cells. Filtered for fold change > 1.5 and raw signal > 100. Columns show gene symbol, fold change, gene description, RNA seq validation fold change and transcript cluster ID. [file 12882_2015_63_MOESM7_ESM.xls]

Category	Name	p-value	q-value FDR B&H	Hit Count in Query List	Hit Count in Genome	Hit in Query List
GO: Molecular Function	GTP binding	2.66E-04	1.00E-01	19	373	"TUBG2,FKBP4,TPX2,NUDT2,RASL12,TUFM,RRAD,MMAA,RAP2A,REM1,GUCY1A3,ARL9,EHD4,EHD3,RABL5,RAB3C,RAB6A,RASL11B,EIF2S3"
GO: Molecular Function	axon guidance receptor activity	4.41E-04	1.00E-01	3	8	"SEMA5A,ROBO2,EPHB1"
GO: Molecular Function	guanyl nucleotide binding	5.07E-04	1.00E-01	19	393	"TUBG2,FKBP4,TPX2,NUDT2,RASL12,TUFM,RRAD,MMAA,RAP2A,REM1,GUCY1A3,ARL9,EHD4,EHD3,RABL5,RAB3C,RAB6A,RASL11B,EIF2S3"
GO: Molecular Function	guanyl ribonucleotide binding	5.07E-04	1.00E-01	19	393	"TUBG2,FKBP4,TPX2,NUDT2,RASL12,TUFM,RRAD,MMAA,RAP2A,REM1,GUCY1A3,ARL9,EHD4,EHD3,RABL5,RAB3C,RAB6A,RASL11B,EIF2S3"
GO: Molecular Function	very-low-density lipoprotein particle receptor activity	2.44E-03	2.22E-01	2	4	"VLDLR,LDLR"
GO: Molecular Function	dolichyl-phosphate-mannose-protein mannosyltransferase activity	2.44E-03	2.22E-01	2	4	"POMT2,POMT1"
GO: Molecular Function	prenyltransferase activity	2.62E-03	2.22E-01	3	14	"FDPS,FDFT1,UBIAD1"
GO: Molecular Function	calmodulin binding	3.05E-03	2.22E-01	10	173	"SNTB1,SNTA1,ADD3,MAP6,RRAD,NRGN,NDUFAF4,REM1,CAMK2A,CACNA1A"
GO: Molecular Function	apolipoprotein binding	3.91E-03	2.22E-01	3	16	"VLDLR,MAPT,LCAT"
GO: Molecular Function	protein dimerization activity	3.94E-03	2.22E-01	36	1104	"ABAT,PRMT2,ACHE,PON3,SLC51B,FGFR2,CENPA,ALDH1A3,HLA-G,HLA-B,PGF,ID1,ARNTL,CRYAB,NR3C2,SYNE1,ABTB2,TOP2A,ROBO2,HIST1H2AI,HIST2H2BE,HIST1H2BM,PDGFC,MYCN,GUCY1A3,BCAS1,STK10,MSH6,EXO5,TAF5,LIMK1,TAL2,SPR,CCBL2,NPAS2,PVRL2"
GO: Molecular Function	farnesyltranstransferase activity	4.01E-03	2.22E-01	2	5	"FDPS,FDFT1"
GO: Molecular Function	beta-galactosidase activity	4.01E-03	2.22E-01	2	5	"GLB1L2,GLB1"
GO: Molecular Function	protein C-terminus binding	6.10E-03	2.22E-01	10	191	"HESX1,XRCC5,PEX6,SDC1,MKI67,COIL,TOP2A,SLC9A3R2,DLG4,NCF2"
GO: Molecular Function	protein kinase C binding	6.13E-03	2.22E-01	5	57	"HDAC9,ADD3,TOP2A,IRS1,TWF2"
GO: Molecular Function	galactosidase activity	8.20E-03	2.22E-01	2	7	"GLB1L2,GLB1"
GO: Molecular Function	histone-arginine N-methyltransferase activity	8.20E-03	2.22E-01	2	7	"PRMT7,PRMT2"
GO: Molecular Function	fibronectin binding	9.81E-03	2.22E-01	3	22	"SFRP2,CCDC80,ITGA4"
GO: Molecular Function	transaminase activity	9.81E-03	2.22E-01	3	22	"ABAT,BCAT2,CCBL2"
GO: Molecular Function	pyrophosphatase activity	1.04E-02	2.22E-01	27	819	"TUBG2,NUDT14,XRCC5,SMARCAL1,PEX6,NUDT2,RASL12,MCM5,ABCC9,TUFM,RRAD,MMAA,RAP2A,TOP2A,ITPA,MYL6B,ABCA6,REM1,EHD4,EHD3,MSH6,GTF2H3,ENTPD1,DDX3Y,RAB6A,RASL11B,EIF2S3"
GO: Molecular Function	GTPase activity	1.05E-02	2.22E-01	11	239	"TUBG2,RASL12,TUFM,RRAD,RAP2A,REM1,EHD4,EHD3,RAB6A,RASL11B,EIF2S3"
GO: Molecular Function	"hydrolase activity, acting on acid anhydrides, in phosphorus-containing anhydrides"	1.07E-02	2.22E-01	27	821	"TUBG2,NUDT14,XRCC5,SMARCAL1,PEX6,NUDT2,RASL12,MCM5,ABCC9,TUFM,RRAD,MMAA,RAP2A,TOP2A,ITPA,MYL6B,ABCA6,REM1,EHD4,EHD3,MSH6,GTF2H3,ENTPD1,DDX3Y,RAB6A,RASL11B,EIF2S3"
GO: Molecular Function	"hydrolase activity, acting on acid anhydrides"	1.12E-02	2.22E-01	27	824	"TUBG2,NUDT14,XRCC5,SMARCAL1,PEX6,NUDT2,RASL12,MCM5,ABCC9,TUFM,RRAD,MMAA,RAP2A,TOP2A,ITPA,MYL6B,ABCA6,REM1,EHD4,EHD3,MSH6,GTF2H3,ENTPD1,DDX3Y,RAB6A,RASL11B,EIF2S3"
GO: Molecular Function	beta-catenin binding	1.13E-02	2.22E-01	5	66	"PRMT2,TRPC4,CBY1,SLC9A3R2,CDH2"
GO: Molecular Function	"transferase activity, transferring nitrogenous groups"	1.25E-02	2.22E-01	3	24	"ABAT,BCAT2,CCBL2"
GO: Molecular Function	protein-arginine N-methyltransferase activity	1.37E-02	2.22E-01	2	9	"PRMT7,PRMT2"
GO: Molecular Function	semaphorin receptor activity	1.37E-02	2.22E-01	2	9	"PLXNA3,PLXNB1"
GO: Molecular Function	"inositol 1,4,5 trisphosphate binding"	1.37E-02	2.22E-01	2	9	"TRPC6,TRPC4"
GO: Molecular Function	arginine N-methyltransferase activity	1.37E-02	2.22E-01	2	9	"PRMT7,PRMT2"
GO: Molecular Function	oxidoreductase activity	1.48E-02	2.22E-01	24	726	"FDFT1,TET1,ALDH1A3,COX4I2,RTN4IP1,GSTK1,PDIA6,CBR4,DUS4L,IDO2,FAM213B,COIL,STEAP4,ACAD11,FADS2,DHCR7,AKR7A2,HBB,NCF2,NDUFC1,ALDH4A1,GPD2,SQLE,SPR"
GO: Molecular Function	protein-lipid complex binding	1.56E-02	2.22E-01	3	26	"VLDLR,MAPT,LDLR"
GO: Molecular Function	lipoprotein particle binding	1.56E-02	2.22E-01	3	26	"VLDLR,MAPT,LDLR"
GO: Molecular Function	DNA-dependent ATPase activity	1.60E-02	2.22E-01	5	72	"XRCC5,SMARCAL1,TOP2A,MSH6,GTF2H3"
GO: Molecular Function	store-operated calcium channel activity	1.69E-02	2.22E-01	2	10	"TRPC6,TRPC4"
GO: Molecular Function	aldehyde dehydrogenase (NAD) activity	1.69E-02	2.22E-01	2	10	"ALDH1A3,ALDH4A1"
GO: Molecular Function	1-pyrroline-5-carboxylate dehydrogenase activity	2.05E-02	2.22E-01	1	1	ALDH4A1
GO: Molecular Function	farnesyl-diphosphate farnesyltransferase activity	2.05E-02	2.22E-01	1	1	FDFT1
GO: Molecular Function	dihydrocoumarin hydrolase activity	2.05E-02	2.22E-01	1	1	PON3
GO: Molecular Function	UDP-sugar diphosphatase activity	2.05E-02	2.22E-01	1	1	NUDT14
GO: Molecular Function	XTP diphosphatase activity	2.05E-02	2.22E-01	1	1	ITPA
GO: Molecular Function	phosphatidylcholine-sterol O-acyltransferase activity	2.05E-02	2.22E-01	1	1	LCAT
GO: Molecular Function	bis(5'-nucleosyl)-tetraphosphatase (asymmetrical) activity	2.05E-02	2.22E-01	1	1	NUDT2
GO: Molecular Function	sn-glycerol-3-phosphate:ubiquinone-8 oxidoreductase activity	2.05E-02	2.22E-01	1	1	GPD2
GO: Molecular Function	fumarylpyruvate hydrolase activity	2.05E-02	2.22E-01	1	1	FAHD1
GO: Molecular Function	4-aminobutyrate transaminase activity	2.05E-02	2.22E-01	1	1	ABAT
GO: Molecular Function	succinate-semialdehyde dehydrogenase binding	2.05E-02	2.22E-01	1	1	ABAT
GO: Molecular Function	hydroxypyruvate isomerase activity	2.05E-02	2.22E-01	1	1	HYI
GO: Molecular Function	methylmalonyl-CoA epimerase activity	2.05E-02	2.22E-01	1	1	MCEE
GO: Molecular Function	thromboxane receptor activity	2.05E-02	2.22E-01	1	1	TBXA2R
GO: Molecular Function	bis(5'-nucleosyl)-tetraphosphatase (symmetrical) activity	2.05E-02	2.22E-01	1	1	NUDT2
GO: Molecular Function	P2Y1 nucleotide receptor binding	2.05E-02	2.22E-01	1	1	DLG4
GO: Molecular Function	muramyl dipeptide binding	2.05E-02	2.22E-01	1	1	NOD2
GO: Molecular Function	polo kinase kinase activity	2.05E-02	2.22E-01	1	1	STK10
GO: Molecular Function	G-protein coupled nucleotide receptor binding	2.05E-02	2.22E-01	1	1	DLG4
GO: Molecular Function	acylpyruvate hydrolase activity	2.05E-02	2.22E-01	1	1	FAHD1
GO: Molecular Function	squalene monooxygenase activity	2.05E-02	2.22E-01	1	1	SQLE
GO: Molecular Function	7-dehydrocholesterol reductase activity	2.05E-02	2.22E-01	1	1	DHCR7
GO: Molecular Function	bis(5'-nucleosyl)-tetraphosphatase activity	2.05E-02	2.22E-01	1	1	NUDT2
GO: Molecular Function	(S)-3-amino-2-methylpropionate transaminase activity	2.05E-02	2.22E-01	1	1	ABAT
GO: Molecular Function	[myelin basic protein]-arginine N-methyltransferase activity	2.05E-02	2.22E-01	1	1	PRMT7
GO: Molecular Function	sepiapterin reductase activity	2.05E-02	2.22E-01	1	1	SPR
GO: Molecular Function	metalloenzyme activator activity	2.05E-02	2.22E-01	1	1	SFRP2
GO: Molecular Function	"phenanthrene-9,10-epoxide hydrolase activity"	2.05E-02	2.22E-01	1	1	AKR7A2
GO: Molecular Function	phenanthrene-epoxide hydrolase activity	2.05E-02	2.22E-01	1	1	AKR7A2
GO: Molecular Function	acetylpyruvate hydrolase activity	2.05E-02	2.22E-01	1	1	FAHD1
GO: Molecular Function	kynurenine-glyoxylate transaminase activity	2.05E-02	2.22E-01	1	1	CCBL2
GO: Molecular Function	squalene synthase activity	2.05E-02	2.22E-01	1	1	FDFT1
GO: Molecular Function	pyruvate secondary active transmembrane transporter activity	2.05E-02	2.22E-01	1	1	SLC16A7
GO: Molecular Function	thromboxane A2 receptor activity	2.05E-02	2.22E-01	1	1	TBXA2R
GO: Molecular Function	ITP diphosphatase activity	2.05E-02	2.22E-01	1	1	ITPA
GO: Molecular Function	hemoglobin beta binding	2.05E-02	2.22E-01	1	1	HBB
GO: Molecular Function	"3,4-dihydrocoumarin hydrolase activity"	2.05E-02	2.22E-01	1	1	PON3
GO: Molecular Function	mevalonate kinase activity	2.05E-02	2.22E-01	1	1	MVK
GO: Molecular Function	sn-glycerol-3-phosphate:ubiquinone oxidoreductase activity	2.05E-02	2.22E-01	1	1	GPD2
GO: Molecular Function	deaminase activity	2.30E-02	2.42E-01	3	30	"ADA,APOBEC1,HRSP12"
GO: Molecular Function	Wnt-protein binding	2.30E-02	2.42E-01	3	30	"APCDD1,SFRP2,FZD8"
GO: Molecular Function	NAD+ binding	2.41E-02	2.47E-01	2	12	"ALDH1A3,SIRT4"
GO: Molecular Function	low-density lipoprotein receptor activity	2.41E-02	2.47E-01	2	12	"VLDLR,LDLR"
GO: Molecular Function	"transferase activity, transferring alkyl or aryl (other than methyl) groups"	2.60E-02	2.63E-01	4	55	"FDPS,FDFT1,GSTK1,UBIAD1"
GO: Molecular Function	PDZ domain binding	2.66E-02	2.63E-01	6	111	"SNTB1,SNTA1,SFRP2,SLC9A3R2,DLG4,FZD8"
GO: Molecular Function	nucleoside-triphosphatase activity	2.97E-02	2.63E-01	24	776	"TUBG2,XRCC5,SMARCAL1,PEX6,RASL12,MCM5,ABCC9,TUFM,RRAD,MMAA,RAP2A,TOP2A,MYL6B,ABCA6,REM1,EHD4,EHD3,MSH6,GTF2H3,ENTPD1,DDX3Y,RAB6A,RASL11B,EIF2S3"
GO: Molecular Function	prostanoid receptor activity	3.23E-02	2.63E-01	2	14	"TBXA2R,PTGER2"
GO: Molecular Function	actin monomer binding	3.23E-02	2.63E-01	2	14	"TWF2,MYL4"
GO: Molecular Function	disulfide oxidoreductase activity	3.43E-02	2.63E-01	3	35	"GSTK1,PDIA6,COIL"
GO: Molecular Function	phosphatase binding	3.49E-02	2.63E-01	7	150	"PPP1R26,PPP1R3C,RCAN2,PPP1R35,SLC9A3R2,DLG4,CDH2"
GO: Molecular Function	GTPase activating protein binding	3.68E-02	2.63E-01	2	15	"PLXNB1,CAMK2A"
GO: Molecular Function	L-isoleucine transaminase activity	4.05E-02	2.63E-01	1	2	BCAT2
GO: Molecular Function	L-leucine transaminase activity	4.05E-02	2.63E-01	1	2	BCAT2
GO: Molecular Function	medium-chain-acyl-CoA dehydrogenase activity	4.05E-02	2.63E-01	1	2	ACAD11
GO: Molecular Function	[heparan sulfate]-glucosamine 3-sulfotransferase 3 activity	4.05E-02	2.63E-01	1	2	HS3ST3B1
GO: Molecular Function	myosin phosphatase regulator activity	4.05E-02	2.63E-01	1	2	DMPK
GO: Molecular Function	beta-aspartyl-peptidase activity	4.05E-02	2.63E-01	1	2	ASRGL1
GO: Molecular Function	NADPH dehydrogenase (quinone) activity	4.05E-02	2.63E-01	1	2	CBR4
GO: Molecular Function	mineralocorticoid receptor activity	4.05E-02	2.63E-01	1	2	NR3C2
GO: Molecular Function	N4-(beta-N-acetylglucosaminyl)-L-asparaginase activity	4.05E-02	2.63E-01	1	2	ASRGL1
GO: Molecular Function	very-low-density lipoprotein particle binding	4.05E-02	2.63E-01	1	2	VLDLR
GO: Molecular Function	[pyruvate dehydrogenase (lipoamide)] phosphatase activity	4.05E-02	2.63E-01	1	2	PDP2
GO: Molecular Function	single-stranded DNA 3'-5' exodeoxyribonuclease activity	4.05E-02	2.63E-01	1	2	EXO5
GO: Molecular Function	reelin receptor activity	4.05E-02	2.63E-01	1	2	VLDLR
GO: Molecular Function	ADP-activated nucleotide receptor activity	4.05E-02	2.63E-01	1	2	DLG4
GO: Molecular Function	isopentenyl-diphosphate delta-isomerase activity	4.05E-02	2.63E-01	1	2	IDI1
GO: Molecular Function	geranyltranstransferase activity	4.05E-02	2.63E-01	1	2	FDPS
GO: Molecular Function	"indoleamine 2,3-dioxygenase activity"	4.05E-02	2.63E-01	1	2	IDO2
GO: Molecular Function	dITP diphosphatase activity	4.05E-02	2.63E-01	1	2	ITPA
GO: Molecular Function	sulfate binding	4.05E-02	2.63E-01	1	2	CD34
GO: Molecular Function	dimethylallyltranstransferase activity	4.05E-02	2.63E-01	1	2	FDPS
GO: Molecular Function	protein-arginine omega-N symmetric methyltransferase activity	4.05E-02	2.63E-01	1	2	PRMT7
GO: Molecular Function	aryldialkylphosphatase activity	4.05E-02	2.63E-01	1	2	PON3
GO: Molecular Function	parathyroid hormone receptor activity	4.05E-02	2.63E-01	1	2	PTH1R
GO: Molecular Function	glycoprotein transporter activity	4.05E-02	2.63E-01	1	2	VLDLR
GO: Molecular Function	single thymine insertion binding	4.05E-02	2.63E-01	1	2	MSH6
GO: Molecular Function	cysteine-S-conjugate beta-lyase activity	4.05E-02	2.63E-01	1	2	CCBL2
GO: Molecular Function	acetylcholinesterase activity	4.05E-02	2.63E-01	1	2	ACHE
GO: Molecular Function	NAD(P)H dehydrogenase (quinone) activity	4.05E-02	2.63E-01	1	2	CBR4
GO: Molecular Function	L-valine transaminase activity	4.05E-02	2.63E-01	1	2	BCAT2
GO: Molecular Function	sulfonylurea receptor activity	4.05E-02	2.63E-01	1	2	ABCC9
GO: Molecular Function	single-stranded DNA 5'-3' exodeoxyribonuclease activity	4.05E-02	2.63E-01	1	2	EXO5
GO: Molecular Function	glycerol-3-phosphate dehydrogenase activity	4.05E-02	2.63E-01	1	2	GPD2
GO: Molecular Function	prostaglandin-F synthase activity	4.05E-02	2.63E-01	1	2	FAM213B
GO: Molecular Function	branched-chain-amino-acid transaminase activity	4.05E-02	2.63E-01	1	2	BCAT2
GO: Molecular Function	very-long-chain-acyl-CoA dehydrogenase activity	4.05E-02	2.63E-01	1	2	ACAD11
GO: Molecular Function	asparaginase activity	4.05E-02	2.63E-01	1	2	ASRGL1
GO: Molecular Function	myosin II heavy chain binding	4.05E-02	2.63E-01	1	2	MYL4
GO: Molecular Function	platelet-derived growth factor receptor binding	4.15E-02	2.65E-01	2	16	"PDGFD,PDGFC"
GO: Molecular Function	lipoprotein particle receptor activity	4.15E-02	2.65E-01	2	16	"VLDLR,LDLR"
GO: Molecular Function	protein phosphatase inhibitor activity	4.23E-02	2.66E-01	3	38	"PPP1R26,PPP1R35,PTN"
GO: Molecular Function	"4 iron, 4 sulfur cluster binding"	4.23E-02	2.66E-01	3	38	"CDK5RAP1,NTHL1,EXO5"
GO: Molecular Function	glycosaminoglycan binding	4.33E-02	2.70E-01	8	191	"NOD2,FGFR2,PRELP,CCDC80,PGF,LTBP4,POSTN,PTN"
GO: Molecular Function	protein phosphatase regulator activity	4.41E-02	2.73E-01	4	65	"PPP1R26,PPP1R35,DMPK,PTN"
GO: Molecular Function	protein kinase binding	4.62E-02	2.80E-01	15	452	"NOD2,HDAC9,ADD3,TPX2,CDK5RAP1,MAPT,CSPG4,PLK1S1,TOP2A,TNIP1,IRS1,TWF2,CCNA2,CCND2,CDH2"
GO: Molecular Function	mannosyltransferase activity	4.64E-02	2.80E-01	2	17	"POMT2,POMT1"
GO: Molecular Function	NAD-dependent protein deacetylase activity	4.64E-02	2.80E-01	2	17	"HDAC9,SIRT4"
GO: Biological Process	sterol biosynthetic process	7.09E-05	2.06E-01	7	50	"FDPS,FDFT1,MVK,C14orf1,IDI1,DHCR7,SQLE"
GO: Biological Process	regulation of axonogenesis	1.48E-04	2.06E-01	10	116	"ACHE,MAPT,PLXNA3,PLXNB1,ROBO2,TWF2,CDKL5,CACNA1A,LIMK1,CDH2"
GO: Biological Process	isoprenoid biosynthetic process	1.69E-04	2.06E-01	5	26	"FDPS,FDFT1,MVK,ALDH1A3,IDI1"
GO: Biological Process	regulation of cell morphogenesis involved in differentiation	2.58E-04	2.06E-01	14	225	"ACHE,SFRP2,MAPT,PLXNA3,PLXNB1,SYNE1,OBSL1,RAP2A,ROBO2,TWF2,CDKL5,CACNA1A,LIMK1,CDH2"
GO: Biological Process	cholesterol biosynthetic process	2.73E-04	2.06E-01	6	44	"FDPS,FDFT1,MVK,IDI1,DHCR7,SQLE"
GO: Biological Process	regulation of neuron projection development	3.21E-04	2.06E-01	16	286	"ACHE,FKBP4,VLDLR,MAPT,PLXNA3,PLXNB1,CSPG4,SYNE1,OBSL1,RAP2A,ROBO2,TWF2,CDKL5,CACNA1A,LIMK1,CDH2"
GO: Biological Process	regulation of nervous system development	4.08E-04	2.24E-01	25	575	"ACHE,ARHGEF15,FKBP4,XRCC5,SFRP2,CDK5RAP1,VLDLR,MAPT,PLXNA3,CEND1,PLXNB1,DLL4,GDF11,CSPG4,SYNE1,OBSL1,RAP2A,ROBO2,TWF2,MYCN,CDKL5,CACNA1A,LIMK1,EPHB1,CDH2"
GO: Biological Process	cell morphogenesis involved in neuron differentiation	5.28E-04	2.27E-01	26	619	"ACHE,FGFR2,MAPT,PLXNA3,SEMA5A,PLXNB1,TRPC6,TRPC4,SYNE1,OBSL1,RAP2A,ROBO2,DLG4,FZD8,TWF2,RGMA,CDKL5,CACNA1A,NDN,CNTNAP1,LIMK1,EPHB1,SPR,STMN1,CDH2,EFNB1"
GO: Biological Process	sterol metabolic process	5.67E-04	2.27E-01	10	137	"FDPS,FDFT1,MVK,VLDLR,C14orf1,IDI1,DHCR7,LDLR,SQLE,LCAT"
GO: Biological Process	dendrite morphogenesis	5.91E-04	2.27E-01	8	91	"ACHE,SYNE1,OBSL1,RAP2A,DLG4,CDKL5,CACNA1A,EPHB1"
GO: Biological Process	positive regulation of axonogenesis	6.85E-04	2.32E-01	6	52	"MAPT,PLXNB1,ROBO2,TWF2,CDKL5,LIMK1"
GO: Biological Process	synapse organization	7.62E-04	2.32E-01	11	168	"ACHE,FGFR2,ARHGEF15,SNTA1,DMPK,ROBO2,DLG4,CACNA1A,KY,EPHB1,CDH2"
GO: Biological Process	cell morphogenesis involved in differentiation	8.02E-04	2.32E-01	30	777	"ACHE,FGFR2,WT1,SFRP2,MAPT,PLXNA3,SEMA5A,ID1,PLXNB1,TRPC6,TRPC4,SYNE1,OBSL1,RAP2A,ROBO2,DLG4,FZD8,TWF2,RGMA,TEK,CDKL5,CACNA1A,NDN,CNTNAP1,LIMK1,EPHB1,SPR,STMN1,CDH2,EFNB1"
GO: Biological Process	cell part morphogenesis	8.88E-04	2.32E-01	30	782	"ACHE,FGFR2,MAPT,PLXNA3,SEMA5A,PLXNB1,CEP89,TRPC6,TRPC4,SYNE1,CBY1,OBSL1,RAP2A,ROBO2,DLG4,FZD8,TWF2,RGMA,C2CD3,CDKL5,IFT80,CACNA1A,NDN,CNTNAP1,LIMK1,EPHB1,STMN1,CDH2,EFNB1,PVRL2"
GO: Biological Process	alcohol biosynthetic process	9.29E-04	2.32E-01	10	146	"ACHE,FDPS,FDFT1,MVK,C14orf1,IDI1,DHCR7,PTH1R,SQLE,LCAT"
GO: Biological Process	cholesterol metabolic process	1.04E-03	2.32E-01	9	123	"FDPS,FDFT1,MVK,VLDLR,IDI1,DHCR7,LDLR,SQLE,LCAT"
GO: Biological Process	positive regulation of developmental growth	1.12E-03	2.32E-01	6	57	"FDPS,WT1,MAPT,TWF2,CDKL5,LIMK1"
GO: Biological Process	cerebellum maturation	1.26E-03	2.32E-01	2	3	"CEND1,CACNA1A"
GO: Biological Process	farnesyl diphosphate metabolic process	1.26E-03	2.32E-01	2	3	"FDPS,FDFT1"
GO: Biological Process	negative regulation of methylation-dependent chromatin silencing	1.26E-03	2.32E-01	2	3	"TET1,APOBEC1"
GO: Biological Process	cell projection morphogenesis	1.32E-03	2.32E-01	29	766	"ACHE,FGFR2,MAPT,PLXNA3,SEMA5A,PLXNB1,CEP89,TRPC6,TRPC4,SYNE1,CBY1,OBSL1,RAP2A,ROBO2,DLG4,FZD8,TWF2,RGMA,C2CD3,CDKL5,IFT80,CACNA1A,NDN,CNTNAP1,LIMK1,EPHB1,STMN1,CDH2,EFNB1"
GO: Biological Process	anatomical structure formation involved in morphogenesis	1.33E-03	2.32E-01	34	949	"HESX1,HDAC9,TET1,FGFR2,ADA,WT1,SFRP2,ALDH1A3,LEO1,PGF,SEMA5A,CEND1,MEOX1,ID1,CEP89,DLL4,CSPG4,CBY1,OBSL1,CEACAM1,TBXA2R,TBX3,RGMA,TEK,C2CD3,S1PR1,IFT80,CACNA1A,CNTNAP1,CD34,EPHB1,PTPRB,EFNB2,PVRL2"
GO: Biological Process	neuron projection morphogenesis	1.40E-03	2.34E-01	25	627	"ACHE,FGFR2,MAPT,PLXNA3,SEMA5A,PLXNB1,TRPC6,TRPC4,SYNE1,OBSL1,RAP2A,ROBO2,DLG4,FZD8,TWF2,RGMA,CDKL5,CACNA1A,NDN,CNTNAP1,LIMK1,EPHB1,STMN1,CDH2,EFNB1"
GO: Biological Process	regulation of cell development	1.73E-03	2.60E-01	25	637	"HDAC9,ACHE,FDPS,FKBP4,XRCC5,SFRP2,CDK5RAP1,VLDLR,MAPT,PLXNA3,PLXNB1,DLL4,GDF11,CSPG4,SYNE1,OBSL1,RAP2A,TBX3,ROBO2,TWF2,MYCN,CDKL5,CACNA1A,LIMK1,CDH2"
GO: Biological Process	embryonic pattern specification	1.74E-03	2.60E-01	6	62	"FGFR2,WT1,MEOX1,TBX3,C2CD3,EFNB1"
GO: Biological Process	developmental cell growth	1.81E-03	2.60E-01	8	108	"PRMT2,FDPS,MAPT,PLXNA3,TWF2,CDKL5,NDN,LIMK1"
GO: Biological Process	positive regulation of axon extension	1.88E-03	2.60E-01	4	26	"MAPT,TWF2,CDKL5,LIMK1"
GO: Biological Process	alcohol metabolic process	1.89E-03	2.60E-01	17	370	"ACHE,FDPS,FDFT1,MVK,VLDLR,C14orf1,IDI1,PLCB2,IP6K2,INPP5B,DHCR7,MBOAT1,PTH1R,LDLR,GPD2,SQLE,LCAT"
GO: Biological Process	small molecule biosynthetic process	2.10E-03	2.71E-01	20	473	"ACHE,FDPS,FDFT1,MVK,ALDH1A3,C14orf1,IDI1,CBR4,FAM213B,CSPG4,MMAA,BCAT2,FADS2,DHCR7,COQ5,PTH1R,UBIAD1,ALDH4A1,SQLE,LCAT"
GO: Biological Process	regulation of developmental growth	2.32E-03	2.71E-01	9	138	"FDPS,FGFR2,WT1,SFRP2,MAPT,PLXNA3,TWF2,CDKL5,LIMK1"
GO: Biological Process	positive regulation of cell division	2.40E-03	2.71E-01	6	66	"FGFR2,PDGFD,PGF,AURKB,PDGFC,PTN"
GO: Biological Process	quinone metabolic process	2.49E-03	2.71E-01	4	28	"CBR4,COQ5,AKR7A2,UBIAD1"
GO: Biological Process	regulation of methylation-dependent chromatin silencing	2.49E-03	2.71E-01	2	4	"TET1,APOBEC1"
GO: Biological Process	axonogenesis	2.50E-03	2.71E-01	22	549	"ACHE,FGFR2,MAPT,PLXNA3,SEMA5A,PLXNB1,TRPC6,TRPC4,ROBO2,DLG4,FZD8,TWF2,RGMA,CDKL5,CACNA1A,NDN,CNTNAP1,LIMK1,EPHB1,STMN1,CDH2,EFNB1"
GO: Biological Process	regulation of neurogenesis	2.54E-03	2.71E-01	21	515	"ACHE,FKBP4,XRCC5,CDK5RAP1,VLDLR,MAPT,PLXNA3,PLXNB1,DLL4,GDF11,CSPG4,SYNE1,OBSL1,RAP2A,ROBO2,TWF2,MYCN,CDKL5,CACNA1A,LIMK1,CDH2"
GO: Biological Process	vasculature development	2.56E-03	2.71E-01	23	585	"HDAC9,FGFR2,ARHGEF15,WT1,SFRP2,PGF,SEMA5A,ID1,DLL4,CSPG4,GJA4,CEACAM1,TBXA2R,TBX3,FZD8,DHCR7,TEK,S1PR1,CD34,EPHB1,CDH2,PTPRB,EFNB2"
GO: Biological Process	regulation of cell projection organization	2.60E-03	2.71E-01	16	349	"ACHE,FKBP4,VLDLR,MAPT,PLXNA3,PLXNB1,CSPG4,SYNE1,OBSL1,RAP2A,ROBO2,TWF2,CDKL5,CACNA1A,LIMK1,CDH2"
GO: Biological Process	protein localization to synapse	2.69E-03	2.73E-01	3	14	"DLGAP1,CEP112,DLG4"
GO: Biological Process	metanephros development	2.79E-03	2.75E-01	7	91	"WT1,FRAS1,GDF11,ROBO2,ITGA8,NPHS2,CD34"
GO: Biological Process	cell morphogenesis	2.89E-03	2.75E-01	36	1072	"ACHE,FGFR2,WT1,SFRP2,MAPT,PLXNA3,SEMA5A,ID1,PLXNB1,CEP89,TRPC6,TRPC4,PHIP,SYNE1,CBY1,OBSL1,RAP2A,ROBO2,KLF2,DLG4,FZD8,TWF2,RGMA,TEK,C2CD3,CDKL5,IFT80,CACNA1A,NDN,CNTNAP1,LIMK1,EPHB1,SPR,STMN1,CDH2,EFNB1"
GO: Biological Process	single-organism biosynthetic process	2.94E-03	2.75E-01	20	487	"ACHE,FDPS,FDFT1,MVK,ALDH1A3,C14orf1,IDI1,CBR4,FAM213B,CSPG4,MMAA,BCAT2,FADS2,DHCR7,COQ5,PTH1R,UBIAD1,ALDH4A1,SQLE,LCAT"
GO: Biological Process	regulation of neuron differentiation	3.39E-03	3.04E-01	18	425	"ACHE,FKBP4,CDK5RAP1,VLDLR,MAPT,PLXNA3,PLXNB1,GDF11,CSPG4,SYNE1,OBSL1,RAP2A,ROBO2,TWF2,CDKL5,CACNA1A,LIMK1,CDH2"
GO: Biological Process	regulation of cell division	3.55E-03	3.04E-01	7	95	"FGFR2,PDGFD,SFRP2,PGF,AURKB,PDGFC,PTN"
GO: Biological Process	regulation of axon extension	3.63E-03	3.04E-01	5	50	"MAPT,PLXNA3,TWF2,CDKL5,LIMK1"
GO: Biological Process	axon development	3.76E-03	3.04E-01	22	568	"ACHE,FGFR2,MAPT,PLXNA3,SEMA5A,PLXNB1,TRPC6,TRPC4,ROBO2,DLG4,FZD8,TWF2,RGMA,CDKL5,CACNA1A,NDN,CNTNAP1,LIMK1,EPHB1,STMN1,CDH2,EFNB1"
GO: Biological Process	organonitrogen compound catabolic process	3.90E-03	3.04E-01	34	1015	"ABAT,TUBG2,ADA,PRELP,SMARCAL1,ASRGL1,PEX6,APOBEC1,RASL12,SDC1,PLXNB1,IDO2,CSPG4,RRAD,GLB1,TBC1D30,NTHL1,RAP2A,BCAT2,TOP2A,ITPA,REM1,CDKL5,S1PR1,MYL4,MSH6,NCF2,ENTPD1,LDLR,ALDH4A1,RAB6A,RASL11B,EIF2S3,CCBL2"
GO: Biological Process	sprouting angiogenesis	3.96E-03	3.04E-01	5	51	"HDAC9,PGF,DLL4,TEK,EFNB2"
GO: Biological Process	metanephric glomerulus development	4.02E-03	3.04E-01	3	16	"WT1,NPHS2,CD34"
GO: Biological Process	receptor localization to synapse	4.09E-03	3.04E-01	2	5	"CEP112,DLG4"
GO: Biological Process	metanephric glomerular mesangium development	4.09E-03	3.04E-01	2	5	"WT1,CD34"
GO: Biological Process	positive regulation of glucose import in response to insulin stimulus	4.09E-03	3.04E-01	2	5	"C2CD5,IRS1"
GO: Biological Process	muscle structure development	4.12E-03	3.04E-01	21	537	"HDAC9,ACHE,FDPS,FAM65B,FGFR2,WT1,SDC1,CRYAB,DLL4,SYNE1,CBY1,OBSL1,DMPK,TBX3,MYL6B,DES,ITGA8,MYL4,KY,CDH2,EFNB2"
GO: Biological Process	monocarboxylic acid catabolic process	4.22E-03	3.06E-01	7	98	"ABAT,PON3,MCEE,MMAA,IRS1,ACAD11,ALDH4A1"
GO: Biological Process	circulatory system development	4.46E-03	3.07E-01	30	871	"HDAC9,FDPS,FGFR2,ARHGEF15,WT1,SFRP2,PGF,SEMA5A,ID1,DLL4,CSPG4,NPY1R,GJA4,CBY1,OBSL1,CEACAM1,TBXA2R,TBX3,ITGA4,FZD8,DHCR7,TEK,C2CD3,S1PR1,MTERFD2,CD34,EPHB1,CDH2,PTPRB,EFNB2"
GO: Biological Process	cardiovascular system development	4.46E-03	3.07E-01	30	871	"HDAC9,FDPS,FGFR2,ARHGEF15,WT1,SFRP2,PGF,SEMA5A,ID1,DLL4,CSPG4,NPY1R,GJA4,CBY1,OBSL1,CEACAM1,TBXA2R,TBX3,ITGA4,FZD8,DHCR7,TEK,C2CD3,S1PR1,MTERFD2,CD34,EPHB1,CDH2,PTPRB,EFNB2"
GO: Biological Process	cellular component morphogenesis	4.56E-03	3.07E-01	37	1142	"ACHE,FGFR2,WT1,SFRP2,MAPT,PLXNA3,SEMA5A,ID1,PLXNB1,CEP89,TRPC6,TRPC4,PHIP,SYNE1,CBY1,OBSL1,RAP2A,ROBO2,KLF2,DLG4,FZD8,TWF2,RGMA,TEK,C2CD3,CDKL5,IFT80,CACNA1A,NDN,CNTNAP1,LIMK1,EPHB1,SPR,STMN1,CDH2,EFNB1,PVRL2"
GO: Biological Process	axon extension	4.56E-03	3.07E-01	6	75	"MAPT,PLXNA3,TWF2,CDKL5,NDN,LIMK1"
GO: Biological Process	cellular lipid metabolic process	4.68E-03	3.07E-01	31	912	"ACHE,FDPS,FDFT1,MVK,ALDH1A3,MCEE,ETNK1,SDC1,ARSI,IDI1,PLCB2,CBR4,FAM213B,IP6K2,PIGA,MMAA,GLB1,PIGY,SIRT4,IRS1,ACAD11,FADS2,INPP5B,PDP2,MBOAT1,LDLR,RGL1,B4GALT4,GPD2,LCAT,NPAS2"
GO: Biological Process	regulation of cell growth	4.72E-03	3.07E-01	15	338	"FDPS,WT1,SFRP2,MAPT,PLXNA3,CRYAB,IP6K2,RRAD,ABTB2,LTBP4,TWF2,CDKL5,TCHP,NDN,LIMK1"
GO: Biological Process	phospholipid metabolic process	4.93E-03	3.16E-01	14	307	"ACHE,FDPS,FDFT1,MVK,ETNK1,IDI1,PLCB2,IP6K2,PIGA,PIGY,INPP5B,MBOAT1,LDLR,LCAT"
GO: Biological Process	neuron projection extension	5.18E-03	3.16E-01	6	77	"MAPT,PLXNA3,TWF2,CDKL5,NDN,LIMK1"
GO: Biological Process	carboxylic acid catabolic process	5.45E-03	3.16E-01	11	216	"ABAT,PON3,ASRGL1,MCEE,IDO2,MMAA,BCAT2,IRS1,ACAD11,ALDH4A1,CCBL2"
GO: Biological Process	organic acid catabolic process	5.45E-03	3.16E-01	11	216	"ABAT,PON3,ASRGL1,MCEE,IDO2,MMAA,BCAT2,IRS1,ACAD11,ALDH4A1,CCBL2"
GO: Biological Process	organic hydroxy compound metabolic process	5.46E-03	3.16E-01	19	480	"ACHE,FDPS,FDFT1,MVK,VLDLR,C14orf1,IDI1,PLCB2,IP6K2,INPP5B,DHCR7,MBOAT1,CACNA1A,PTH1R,LDLR,GPD2,SQLE,LCAT,SPR"
GO: Biological Process	organic hydroxy compound biosynthetic process	5.65E-03	3.16E-01	10	187	"ACHE,FDPS,FDFT1,MVK,C14orf1,IDI1,DHCR7,PTH1R,SQLE,LCAT"
GO: Biological Process	dendrite development	5.67E-03	3.16E-01	9	158	"ACHE,VLDLR,SYNE1,OBSL1,RAP2A,DLG4,CDKL5,CACNA1A,EPHB1"
GO: Biological Process	negative regulation of organelle organization	5.84E-03	3.16E-01	11	218	"TET1,FGFR2,FKBP4,APOBEC1,AURKB,DNMT1,TWF2,MAD1L1,S1PR1,VILL,STMN1"
GO: Biological Process	negative regulation of non-canonical Wnt signaling pathway	6.05E-03	3.16E-01	2	6	"SFRP2,IFT80"
GO: Biological Process	central nervous system maturation	6.05E-03	3.16E-01	2	6	"CEND1,CACNA1A"
GO: Biological Process	hindbrain maturation	6.05E-03	3.16E-01	2	6	"CEND1,CACNA1A"
GO: Biological Process	deoxyribonucleoside triphosphate catabolic process	6.05E-03	3.16E-01	2	6	"ADA,ITPA"
GO: Biological Process	single-organism catabolic process	6.06E-03	3.16E-01	13	282	"ABAT,PON3,ASRGL1,MCEE,IDO2,MMAA,BCAT2,IRS1,ACAD11,LDLR,ALDH4A1,GPD2,CCBL2"
GO: Biological Process	small molecule catabolic process	6.06E-03	3.16E-01	13	282	"ABAT,PON3,ASRGL1,MCEE,IDO2,MMAA,BCAT2,IRS1,ACAD11,LDLR,ALDH4A1,GPD2,CCBL2"
GO: Biological Process	lipid metabolic process	6.13E-03	3.16E-01	39	1243	"NOD2,ACHE,FDPS,FDFT1,NAAA,MVK,ALDH1A3,VLDLR,MCEE,ETNK1,APOBEC1,SDC1,ARSI,C14orf1,IDI1,PLCB2,CBR4,FAM213B,IP6K2,PIGA,MMAA,GLB1,PIGY,SIRT4,IRS1,ACAD11,FADS2,INPP5B,DHCR7,TEK,PDP2,MBOAT1,LDLR,RGL1,B4GALT4,GPD2,SQLE,LCAT,NPAS2"
GO: Biological Process	negative regulation of cellular component organization	6.16E-03	3.16E-01	17	416	"TET1,FGFR2,ARHGEF15,FKBP4,SFRP2,PLXNA3,APOBEC1,AURKB,CSPG4,DNMT1,ROBO2,DLG4,TWF2,MAD1L1,S1PR1,VILL,STMN1"
GO: Biological Process	blood vessel development	6.44E-03	3.21E-01	21	559	"HDAC9,FGFR2,WT1,SFRP2,PGF,SEMA5A,ID1,DLL4,CSPG4,GJA4,CEACAM1,TBXA2R,TBX3,DHCR7,TEK,S1PR1,CD34,EPHB1,CDH2,PTPRB,EFNB2"
GO: Biological Process	regulation of dendrite morphogenesis	6.87E-03	3.21E-01	5	58	"ACHE,SYNE1,OBSL1,RAP2A,CDKL5"
GO: Biological Process	regulation of cell morphogenesis	6.96E-03	3.21E-01	15	353	"ACHE,SFRP2,MAPT,PLXNA3,PLXNB1,PHIP,SYNE1,OBSL1,RAP2A,ROBO2,TWF2,CDKL5,CACNA1A,LIMK1,CDH2"
GO: Biological Process	neuron projection development	7.18E-03	3.21E-01	28	825	"ACHE,FGFR2,FKBP4,VLDLR,MAPT,PLXNA3,SEMA5A,PLXNB1,TRPC6,TRPC4,CSPG4,SYNE1,OBSL1,RAP2A,ROBO2,DLG4,FZD8,TWF2,RGMA,CDKL5,CACNA1A,NDN,CNTNAP1,LIMK1,EPHB1,STMN1,CDH2,EFNB1"
GO: Biological Process	cell growth	7.23E-03	3.21E-01	17	423	"PRMT2,FDPS,WT1,SFRP2,MAPT,PLXNA3,CRYAB,IP6K2,RRAD,ABTB2,LTBP4,TWF2,CDKL5,TCHP,CACNA1A,NDN,LIMK1"
GO: Biological Process	regulation of multicellular organismal development	7.67E-03	3.21E-01	41	1341	"HDAC9,ACHE,FDPS,FGFR2,ARHGEF15,ADA,FKBP4,XRCC5,WT1,SFRP2,CDK5RAP1,HLA-G,VLDLR,LEO1,HLA-B,PGF,MAPT,PLXNA3,CEND1,ID1,PLXNB1,LRRC17,DLL4,GDF11,CSPG4,SYNE1,OBSL1,RAP2A,TBXA2R,TBX3,ROBO2,TWF2,TEK,MYCN,CDKL5,CACNA1A,LIMK1,CD34,EPHB1,CDH2,EFNB2"
GO: Biological Process	regulation of cytoskeleton organization	8.20E-03	3.21E-01	14	326	"FKBP4,CCL27,TPX2,MAPT,PLXNA3,AURKB,PLXNB1,TWF2,CAMSAP3,TEK,S1PR1,VILL,LIMK1,STMN1"
GO: Biological Process	regulation of dendritic cell differentiation	8.36E-03	3.21E-01	2	7	"HLA-G,HLA-B"
GO: Biological Process	positive regulation of heart growth	8.36E-03	3.21E-01	2	7	"FDPS,WT1"
GO: Biological Process	short-chain fatty acid catabolic process	8.36E-03	3.21E-01	2	7	"MCEE,MMAA"
GO: Biological Process	cardiac muscle cell fate commitment	8.36E-03	3.21E-01	2	7	"WT1,TBX3"
GO: Biological Process	negative regulation of chromatin silencing	8.36E-03	3.21E-01	2	7	"TET1,APOBEC1"
GO: Biological Process	peptidyl-lysine deacetylation	8.36E-03	3.21E-01	2	7	"HDAC9,SIRT4"
GO: Biological Process	cellular response to X-ray	8.36E-03	3.21E-01	2	7	"XRCC5,SFRP2"
GO: Biological Process	regulation of extent of cell growth	8.49E-03	3.21E-01	5	61	"MAPT,PLXNA3,TWF2,CDKL5,LIMK1"
GO: Biological Process	cell projection organization	8.72E-03	3.21E-01	35	1111	"ACHE,FGFR2,FKBP4,VLDLR,MAPT,PLXNA3,SEMA5A,PLXNB1,CEP89,TRPC6,TRPC4,CSPG4,SYNE1,CBY1,OBSL1,RAP2A,ROBO2,DLG4,FZD8,TWF2,RGMA,C2CD3,ITGA8,CDKL5,IFT80,CACNA1A,RABL5,NDN,CNTNAP1,LIMK1,EPHB1,STMN1,CDH2,EFNB1,PVRL2"
GO: Biological Process	glial cell migration	8.84E-03	3.21E-01	3	21	"APCDD1,CSPG4,NDN"
GO: Biological Process	synapse assembly	9.31E-03	3.21E-01	6	87	"ACHE,ROBO2,DLG4,CACNA1A,EPHB1,CDH2"
GO: Biological Process	central nervous system development	9.39E-03	3.21E-01	26	766	"HESX1,FGFR2,SFRP2,CKB,CDK5RAP1,ALDH1A3,VLDLR,PLXNA3,PFDN1,CEND1,RCAN2,GDF11,SERPINI1,TBX3,ROBO2,FZD8,PDGFC,MYCN,C2CD3,S1PR1,CACNA1A,NDN,TAL2,EPHB1,STMN1,NPAS2"
GO: Biological Process	regulation of gene silencing	1.01E-02	3.21E-01	3	22	"BCDIN3D,TET1,APOBEC1"
GO: Biological Process	angiogenesis	1.03E-02	3.21E-01	16	404	"HDAC9,FGFR2,SFRP2,PGF,SEMA5A,ID1,DLL4,CSPG4,CEACAM1,TBXA2R,TEK,S1PR1,CD34,EPHB1,PTPRB,EFNB2"
GO: Biological Process	cytoskeleton organization	1.05E-02	3.21E-01	30	928	"RCC1,TUBG2,CENPA,FKBP4,CCL27,TPX2,MAP6,MAPT,PLXNA3,PFDN1,AURKB,PLXNB1,CRYAB,PHIP,PLK1S1,SYNE1,OBSL1,RAP2A,TWF2,CAMSAP3,TEK,DES,S1PR1,LURAP1,NPHS2,VILL,CNTNAP1,LIMK1,STMN1,PVRL2"
GO: Biological Process	regulation of organelle organization	1.08E-02	3.21E-01	23	661	"RCC1,MLLT11,TET1,FGFR2,C2CD5,FKBP4,CCL27,TPX2,MAPT,PLXNA3,APOBEC1,AURKB,PLXNB1,PHIP,DNMT1,TWF2,CAMSAP3,TEK,MAD1L1,S1PR1,VILL,LIMK1,STMN1"
GO: Biological Process	isoprenoid metabolic process	1.09E-02	3.21E-01	7	117	"FDPS,FDFT1,MVK,ALDH1A3,SDC1,IDI1,LDLR"
GO: Biological Process	cardiac muscle cell differentiation	1.09E-02	3.21E-01	6	90	"FDPS,WT1,CBY1,OBSL1,TBX3,EFNB2"
GO: Biological Process	doxorubicin metabolic process	1.10E-02	3.21E-01	2	8	"CBR4,AKR7A2"
GO: Biological Process	chloride ion homeostasis	1.10E-02	3.21E-01	2	8	"CKB,CACNA1A"
GO: Biological Process	aminoglycoside antibiotic metabolic process	1.10E-02	3.21E-01	2	8	"CBR4,AKR7A2"
GO: Biological Process	response to host immune response	1.10E-02	3.21E-01	2	8	"NOD2,GUCY1A3"
GO: Biological Process	daunorubicin metabolic process	1.10E-02	3.21E-01	2	8	"CBR4,AKR7A2"
GO: Biological Process	antigen processing and presentation of endogenous peptide antigen	1.10E-02	3.21E-01	2	8	"HLA-G,HLA-B"
GO: Biological Process	metanephric glomerulus vasculature development	1.10E-02	3.21E-01	2	8	"WT1,CD34"
GO: Biological Process	cellular chloride ion homeostasis	1.10E-02	3.21E-01	2	8	"CKB,CACNA1A"
GO: Biological Process	pyramidal neuron development	1.10E-02	3.21E-01	2	8	"FGFR2,PLXNA3"
GO: Biological Process	histone arginine methylation	1.10E-02	3.21E-01	2	8	"PRMT7,PRMT2"
GO: Biological Process	response to immune response of other organism involved in symbiotic interaction	1.10E-02	3.21E-01	2	8	"NOD2,GUCY1A3"
GO: Biological Process	positive regulation of adaptive immune response based on somatic recombination of immune receptors built from immunoglobulin superfamily domains	1.10E-02	3.21E-01	5	65	"NOD2,ADA,HLA-G,HLA-B,PVRL2"
GO: Biological Process	muscle cell differentiation	1.16E-02	3.21E-01	13	306	"HDAC9,FDPS,FGFR2,WT1,SDC1,SYNE1,CBY1,OBSL1,DMPK,TBX3,ITGA8,CDH2,EFNB2"
GO: Biological Process	regulation of anatomical structure morphogenesis	1.17E-02	3.21E-01	24	704	"HDAC9,ACHE,FGFR2,WT1,SFRP2,PGF,MAPT,PLXNA3,ID1,PLXNB1,DLL4,PHIP,SYNE1,OBSL1,RAP2A,TBXA2R,ROBO2,TWF2,TEK,CDKL5,CACNA1A,LIMK1,CD34,CDH2"
GO: Biological Process	microtubule polymerization or depolymerization	1.17E-02	3.21E-01	5	66	"FKBP4,MAPT,AURKB,CRYAB,STMN1"
GO: Biological Process	respiratory system development	1.19E-02	3.21E-01	10	209	"HESX1,FGFR2,ADA,WT1,ALDH1A3,ID1,KLF2,DHCR7,MYCN,ANO1"
GO: Biological Process	regulation of microtubule-based process	1.24E-02	3.21E-01	7	120	"FKBP4,TPX2,MAPT,AURKB,CAMSAP3,KLHL42,STMN1"
GO: Biological Process	mitotic spindle organization	1.27E-02	3.21E-01	4	44	"RCC1,TPX2,AURKB,STMN1"
GO: Biological Process	pericardium development	1.29E-02	3.21E-01	3	24	"WT1,DLL4,ITGA4"
GO: Biological Process	regulation of microtubule polymerization	1.29E-02	3.21E-01	3	24	"FKBP4,MAPT,STMN1"
GO: Biological Process	osteoblast proliferation	1.29E-02	3.21E-01	3	24	"FGFR2,PLXNB1,LRRC17"
GO: Biological Process	regulation of cell differentiation	1.29E-02	3.21E-01	38	1263	"HDAC9,ACHE,FDPS,TET1,FGFR2,ADA,FKBP4,XRCC5,SFRP2,CDK5RAP1,HLA-G,VLDLR,LEO1,HLA-B,MAPT,PLXNA3,ID1,PLXNB1,LRRC17,DLL4,GDF11,CSPG4,SYNE1,OBSL1,RAP2A,DMPK,TBX3,ROBO2,LTBP4,TWF2,GDF10,MYCN,CDKL5,CACNA1A,LIMK1,CD34,CDH2,EFNB2"
GO: Biological Process	regulation of dendrite development	1.33E-02	3.21E-01	6	94	"ACHE,VLDLR,SYNE1,OBSL1,RAP2A,CDKL5"
GO: Biological Process	growth	1.34E-02	3.21E-01	29	906	"PRMT2,NOD2,FDPS,FGFR2,WT1,SFRP2,MUSTN1,MAPT,PLXNA3,CRYAB,GDF11,IP6K2,RRAD,NPY1R,PHIP,ABTB2,LTBP4,KLF2,TWF2,DHCR7,GDF10,CDKL5,TCHP,CACNA1A,NDN,LIMK1,TAL2,GPD2,SPR"
GO: Biological Process	regulation of muscle cell differentiation	1.35E-02	3.21E-01	7	122	"HDAC9,FDPS,FGFR2,DMPK,TBX3,CDH2,EFNB2"
GO: Biological Process	patterning of blood vessels	1.38E-02	3.21E-01	4	45	"SFRP2,SEMA5A,DLL4,TEK"
GO: Biological Process	positive regulation of neurogenesis	1.39E-02	3.21E-01	8	152	"XRCC5,MAPT,PLXNB1,OBSL1,ROBO2,TWF2,CDKL5,LIMK1"
GO: Biological Process	pyramidal neuron differentiation	1.39E-02	3.21E-01	2	9	"FGFR2,PLXNA3"
GO: Biological Process	polyketide metabolic process	1.39E-02	3.21E-01	2	9	"CBR4,AKR7A2"
GO: Biological Process	monovalent inorganic anion homeostasis	1.39E-02	3.21E-01	2	9	"CKB,CACNA1A"
GO: Biological Process	otic vesicle formation	1.39E-02	3.21E-01	2	9	"HESX1,FGFR2"
GO: Biological Process	kynurenine metabolic process	1.39E-02	3.21E-01	2	9	"IDO2,CCBL2"
GO: Biological Process	response to defenses of other organism involved in symbiotic interaction	1.39E-02	3.21E-01	2	9	"NOD2,GUCY1A3"
GO: Biological Process	negative regulation of gene silencing	1.39E-02	3.21E-01	2	9	"TET1,APOBEC1"
GO: Biological Process	"antigen processing and presentation of exogenous peptide antigen via MHC class I, TAP-independent"	1.39E-02	3.21E-01	2	9	"HLA-G,HLA-B"
GO: Biological Process	response to host	1.39E-02	3.21E-01	2	9	"NOD2,GUCY1A3"
GO: Biological Process	cellular monovalent inorganic anion homeostasis	1.39E-02	3.21E-01	2	9	"CKB,CACNA1A"
GO: Biological Process	mammary gland formation	1.39E-02	3.21E-01	2	9	"FGFR2,TBX3"
GO: Biological Process	response to host defenses	1.39E-02	3.21E-01	2	9	"NOD2,GUCY1A3"
GO: Biological Process	peptidyl-arginine N-methylation	1.39E-02	3.21E-01	2	9	"PRMT7,PRMT2"
GO: Biological Process	visceral serous pericardium development	1.39E-02	3.21E-01	2	9	"WT1,ITGA4"
GO: Biological Process	peptidyl-arginine methylation	1.39E-02	3.21E-01	2	9	"PRMT7,PRMT2"
GO: Biological Process	branching morphogenesis of an epithelial tube	1.41E-02	3.21E-01	9	183	"FGFR2,WT1,SFRP2,PGF,SEMA5A,DLL4,TBX3,TEK,MYCN"
GO: Biological Process	blood vessel morphogenesis	1.43E-02	3.21E-01	18	492	"HDAC9,FGFR2,WT1,SFRP2,PGF,SEMA5A,ID1,DLL4,CSPG4,CEACAM1,TBXA2R,TEK,S1PR1,CD34,EPHB1,CDH2,PTPRB,EFNB2"
GO: Biological Process	indole-containing compound metabolic process	1.44E-02	3.21E-01	3	25	"IDO2,SPR,CCBL2"
GO: Biological Process	benzene-containing compound metabolic process	1.44E-02	3.21E-01	3	25	"PON3,IDO2,CCBL2"
GO: Biological Process	negative regulation of cytoskeleton organization	1.47E-02	3.21E-01	6	96	"FKBP4,AURKB,TWF2,S1PR1,VILL,STMN1"
GO: Biological Process	developmental growth involved in morphogenesis	1.49E-02	3.21E-01	8	154	"FGFR2,SFRP2,MAPT,PLXNA3,TWF2,CDKL5,NDN,LIMK1"
GO: Biological Process	positive regulation of adaptive immune response	1.57E-02	3.21E-01	5	71	"NOD2,ADA,HLA-G,HLA-B,PVRL2"
GO: Biological Process	cofactor metabolic process	1.59E-02	3.21E-01	12	285	"PANK1,MVK,MCEE,CBR4,DNMT1,PDP2,COQ5,AKR7A2,NCF2,UBIAD1,GPD2,SPR"
GO: Biological Process	positive regulation of angiogenesis	1.61E-02	3.21E-01	6	98	"HDAC9,SFRP2,PGF,TBXA2R,TEK,CD34"
GO: Biological Process	striated muscle cell differentiation	1.65E-02	3.21E-01	10	220	"HDAC9,FDPS,WT1,SDC1,CBY1,OBSL1,DMPK,TBX3,CDH2,EFNB2"
GO: Biological Process	osteoblast differentiation	1.66E-02	3.21E-01	8	157	"ACHE,FGFR2,SFRP2,ID1,LRRC17,GDF10,IFT80,PTH1R"
GO: Biological Process	glucose import in response to insulin stimulus	1.72E-02	3.21E-01	2	10	"C2CD5,IRS1"
GO: Biological Process	neurotransmitter catabolic process	1.72E-02	3.21E-01	2	10	"ABAT,ACHE"
GO: Biological Process	regulation of glucose import in response to insulin stimulus	1.72E-02	3.21E-01	2	10	"C2CD5,IRS1"
GO: Biological Process	negative regulation of microtubule polymerization	1.72E-02	3.21E-01	2	10	"FKBP4,STMN1"
GO: Biological Process	establishment of mitochondrion localization	1.72E-02	3.21E-01	2	10	"MAPT,PVRL2"
GO: Biological Process	antigen processing and presentation of endogenous antigen	1.72E-02	3.21E-01	2	10	"HLA-G,HLA-B"
GO: Biological Process	methylation-dependent chromatin silencing	1.72E-02	3.21E-01	2	10	"TET1,APOBEC1"
GO: Biological Process	regulation of natural killer cell mediated cytotoxicity	1.78E-02	3.21E-01	3	27	"HLA-G,HLA-B,PVRL2"
GO: Biological Process	regulation of natural killer cell mediated immunity	1.78E-02	3.21E-01	3	27	"HLA-G,HLA-B,PVRL2"
GO: Biological Process	cell migration involved in sprouting angiogenesis	1.78E-02	3.21E-01	3	27	"HDAC9,DLL4,EFNB2"
GO: Biological Process	positive regulation of T cell mediated cytotoxicity	1.78E-02	3.21E-01	3	27	"HLA-G,HLA-B,PVRL2"
GO: Biological Process	alpha-amino acid metabolic process	1.80E-02	3.21E-01	10	223	"CKB,ASRGL1,IDO2,BCAT2,SIRT4,DNMT1,ALDH4A1,CD34,SPR,CCBL2"
GO: Biological Process	regulation of microtubule cytoskeleton organization	1.84E-02	3.21E-01	6	101	"FKBP4,TPX2,MAPT,AURKB,CAMSAP3,STMN1"
GO: Biological Process	coenzyme metabolic process	1.85E-02	3.21E-01	10	224	"PANK1,MVK,MCEE,DNMT1,PDP2,COQ5,NCF2,UBIAD1,GPD2,SPR"
GO: Biological Process	tube development	1.85E-02	3.21E-01	18	506	"FGFR2,ADA,WT1,SFRP2,PGF,SEMA5A,SDC1,ID1,DLL4,GDF11,TBX3,ROBO2,KLF2,DHCR7,RGMA,TEK,MYCN,C2CD3"
GO: Biological Process	muscle organ development	1.90E-02	3.21E-01	14	362	"HDAC9,ACHE,FDPS,FAM65B,FGFR2,WT1,CRYAB,DLL4,TBX3,MYL6B,DES,MYL4,KY,EFNB2"
GO: Biological Process	positive regulation of phosphatidylinositol 3-kinase activity	1.96E-02	3.21E-01	3	28	"NOD2,IRS1,TEK"
GO: Biological Process	response to hydrogen peroxide	2.01E-02	3.21E-01	6	103	"ADA,SDC1,TRPC6,CRYAB,KLF2,HBB"
GO: Biological Process	oxoacid metabolic process	2.04E-02	3.21E-01	32	1059	"ABAT,PON3,HS3ST3B1,PANK1,CKB,ALDH1A3,PRELP,ASRGL1,MCEE,PET112,SDC1,GSTK1,CBR4,IDO2,FAM213B,CSPG4,MMAA,GLB1,BCAT2,SIRT4,DNMT1,IRS1,ACAD11,FADS2,PDP2,MBOAT1,CACNA1A,ALDH4A1,CD34,B4GALT4,SPR,CCBL2"
GO: Biological Process	isoleucine catabolic process	2.07E-02	3.21E-01	1	1	BCAT2
GO: Biological Process	modulation by symbiont of host signal transduction pathway	2.07E-02	3.21E-01	1	1	TNIP1
GO: Biological Process	leucine biosynthetic process	2.07E-02	3.21E-01	1	1	BCAT2
GO: Biological Process	negative regulation of somatostatin secretion	2.07E-02	3.21E-01	1	1	IRS1
GO: Biological Process	negative regulation of dermatome development	2.07E-02	3.21E-01	1	1	SFRP2
GO: Biological Process	regulation of metaphase plate congression	2.07E-02	3.21E-01	1	1	MAD1L1
GO: Biological Process	atrioventricular bundle cell differentiation	2.07E-02	3.21E-01	1	1	TBX3
GO: Biological Process	menaquinone biosynthetic process	2.07E-02	3.21E-01	1	1	UBIAD1
GO: Biological Process	ITP catabolic process	2.07E-02	3.21E-01	1	1	ITPA
GO: Biological Process	detection of muramyl dipeptide	2.07E-02	3.21E-01	1	1	NOD2
GO: Biological Process	spinal cord anterior/posterior patterning	2.07E-02	3.21E-01	1	1	GDF11
GO: Biological Process	regulation of vasoconstriction by norepinephrine	2.07E-02	3.21E-01	1	1	SNTA1
GO: Biological Process	negative regulation of adenosine receptor signaling pathway	2.07E-02	3.21E-01	1	1	ADA
GO: Biological Process	L-methylmalonyl-CoA metabolic process	2.07E-02	3.21E-01	1	1	MCEE
GO: Biological Process	cerebellar molecular layer development	2.07E-02	3.21E-01	1	1	CACNA1A
GO: Biological Process	"tRNA 3'-trailer cleavage, endonucleolytic"	2.07E-02	3.21E-01	1	1	ELAC2
GO: Biological Process	sinoatrial node cell development	2.07E-02	3.21E-01	1	1	TBX3
GO: Biological Process	regulation of pre-miRNA processing	2.07E-02	3.21E-01	1	1	BCDIN3D
GO: Biological Process	regulation of microvillus length	2.07E-02	3.21E-01	1	1	TWF2
GO: Biological Process	asparagine catabolic process via L-aspartate	2.07E-02	3.21E-01	1	1	ASRGL1
GO: Biological Process	extracellular vesicular exosome assembly	2.07E-02	3.21E-01	1	1	CD34
GO: Biological Process	germinal center B cell differentiation	2.07E-02	3.21E-01	1	1	ADA
GO: Biological Process	"mitochondrial tRNA 3'-trailer cleavage, endonucleolytic"	2.07E-02	3.21E-01	1	1	ELAC2
GO: Biological Process	negative regulation of penile erection	2.07E-02	3.21E-01	1	1	ADA
GO: Biological Process	fibroblast growth factor receptor signaling pathway involved in hemopoiesis	2.07E-02	3.21E-01	1	1	FGFR2
GO: Biological Process	thromboxane A2 signaling pathway	2.07E-02	3.21E-01	1	1	TBXA2R
GO: Biological Process	mitochondrial respiratory chain complex II assembly	2.07E-02	3.21E-01	1	1	SDHAF1
GO: Biological Process	negative regulation of cellular response to hypoxia	2.07E-02	3.21E-01	1	1	CD34
GO: Biological Process	modulation of signal transduction in other organism	2.07E-02	3.21E-01	1	1	TNIP1
GO: Biological Process	glial cell line-derived neurotrophic factor secretion	2.07E-02	3.21E-01	1	1	CD34
GO: Biological Process	respiratory chain complex II assembly	2.07E-02	3.21E-01	1	1	SDHAF1
GO: Biological Process	negative regulation of metanephric glomerular mesangial cell proliferation	2.07E-02	3.21E-01	1	1	WT1
GO: Biological Process	negative regulation of pre-miRNA processing	2.07E-02	3.21E-01	1	1	BCDIN3D
GO: Biological Process	detection of peptidoglycan	2.07E-02	3.21E-01	1	1	NOD2
GO: Biological Process	nucleus accumbens development	2.07E-02	3.21E-01	1	1	ALDH1A3
GO: Biological Process	deoxyadenosine metabolic process	2.07E-02	3.21E-01	1	1	ADA
GO: Biological Process	negative regulation of cellular response to heat	2.07E-02	3.21E-01	1	1	CD34
GO: Biological Process	positive regulation of glial cell line-derived neurotrophic factor secretion	2.07E-02	3.21E-01	1	1	CD34
GO: Biological Process	positive regulation of prostaglandin-E synthase activity	2.07E-02	3.21E-01	1	1	NOD2
GO: Biological Process	mitochondrial tRNA 3'-end processing	2.07E-02	3.21E-01	1	1	ELAC2
GO: Biological Process	fibroblast growth factor receptor signaling pathway involved in negative regulation of apoptotic process in bone marrow	2.07E-02	3.21E-01	1	1	FGFR2
GO: Biological Process	pteridine metabolic process	2.07E-02	3.21E-01	1	1	SPR
GO: Biological Process	regulation of production of small RNA involved in gene silencing by RNA	2.07E-02	3.21E-01	1	1	BCDIN3D
GO: Biological Process	positive regulation of dendritic cell cytokine production	2.07E-02	3.21E-01	1	1	NOD2
GO: Biological Process	positive regulation of single stranded viral RNA replication via double stranded DNA intermediate	2.07E-02	3.21E-01	1	1	TOP2A
GO: Biological Process	regulation of vasoconstriction by circulating norepinephrine	2.07E-02	3.21E-01	1	1	SNTA1
GO: Biological Process	menaquinone metabolic process	2.07E-02	3.21E-01	1	1	UBIAD1
GO: Biological Process	asparagine catabolic process	2.07E-02	3.21E-01	1	1	ASRGL1
GO: Biological Process	regulation of prostaglandin-E synthase activity	2.07E-02	3.21E-01	1	1	NOD2
GO: Biological Process	mitochondrial respiratory chain complex II biogenesis	2.07E-02	3.21E-01	1	1	SDHAF1
GO: Biological Process	cerebellar granular layer maturation	2.07E-02	3.21E-01	1	1	CEND1
GO: Biological Process	telophase	2.07E-02	3.21E-01	1	1	MAD1L1
GO: Biological Process	steroid hormone receptor complex assembly	2.07E-02	3.21E-01	1	1	FKBP4
GO: Biological Process	coronal suture morphogenesis	2.07E-02	3.21E-01	1	1	FGFR2
GO: Biological Process	coreceptor-mediated virion attachment to host cell	2.07E-02	3.21E-01	1	1	PVRL2
GO: Biological Process	regulation of glial cell line-derived neurotrophic factor secretion	2.07E-02	3.21E-01	1	1	CD34
GO: Biological Process	modulation by symbiont of host I-kappaB kinase/NF-kappaB cascade	2.07E-02	3.21E-01	1	1	TNIP1
GO: Biological Process	"negative regulation of synaptic transmission, cholinergic"	2.07E-02	3.21E-01	1	1	ACHE
GO: Biological Process	xanthine biosynthetic process	2.07E-02	3.21E-01	1	1	ADA
GO: Biological Process	regulation of excitatory postsynaptic membrane potential involved in skeletal muscle contraction	2.07E-02	3.21E-01	1	1	DMPK
GO: Biological Process	mitotic telophase	2.07E-02	3.21E-01	1	1	MAD1L1
GO: Biological Process	negative regulation of interleukin-18 production	2.07E-02	3.21E-01	1	1	NOD2
GO: Biological Process	phenylacetate catabolic process	2.07E-02	3.21E-01	1	1	PON3
GO: Biological Process	modulation of signal transduction in other organism involved in symbiotic interaction	2.07E-02	3.21E-01	1	1	TNIP1
GO: Biological Process	regulation of skeletal muscle contraction by neural stimulation via neuromuscular junction	2.07E-02	3.21E-01	1	1	DMPK
GO: Biological Process	deoxyadenosine catabolic process	2.07E-02	3.21E-01	1	1	ADA
GO: Biological Process	fibroblast growth factor receptor signaling pathway involved in positive regulation of cell proliferation in bone marrow	2.07E-02	3.21E-01	1	1	FGFR2
GO: Biological Process	muscle contraction	2.07E-02	3.21E-01	12	296	"SNTB1,SNTA1,ADA,STBD1,CRYAB,NPY1R,DMPK,TBXA2R,MYL6B,DES,GUCY1A3,MYL4"
GO: Biological Process	regulation of T cell tolerance induction	2.07E-02	3.21E-01	2	11	"HLA-G,HLA-B"
GO: Biological Process	ubiquinone biosynthetic process	2.07E-02	3.21E-01	2	11	"COQ5,UBIAD1"
GO: Biological Process	indole-containing compound catabolic process	2.07E-02	3.21E-01	2	11	"IDO2,CCBL2"
GO: Biological Process	terpenoid biosynthetic process	2.07E-02	3.21E-01	2	11	"FDPS,ALDH1A3"
GO: Biological Process	indolalkylamine catabolic process	2.07E-02	3.21E-01	2	11	"IDO2,CCBL2"
GO: Biological Process	regulation of spindle organization	2.07E-02	3.21E-01	2	11	"TPX2,AURKB"
GO: Biological Process	tryptophan catabolic process	2.07E-02	3.21E-01	2	11	"IDO2,CCBL2"
GO: Biological Process	otic vesicle morphogenesis	2.07E-02	3.21E-01	2	11	"HESX1,FGFR2"
GO: Biological Process	cardiac muscle tissue development	2.09E-02	3.23E-01	8	164	"FDPS,FGFR2,WT1,DLL4,CBY1,OBSL1,TBX3,EFNB2"
GO: Biological Process	positive regulation of lipid kinase activity	2.15E-02	3.29E-01	3	29	"NOD2,IRS1,TEK"
GO: Biological Process	aromatic amino acid family metabolic process	2.15E-02	3.29E-01	3	29	"IDO2,SPR,CCBL2"
GO: Biological Process	microtubule polymerization	2.15E-02	3.29E-01	3	29	"FKBP4,MAPT,STMN1"
GO: Biological Process	lipid modification	2.23E-02	3.38E-01	8	166	"MCEE,IP6K2,MMAA,SIRT4,IRS1,ACAD11,INPP5B,LCAT"
GO: Biological Process	negative regulation of protein polymerization	2.23E-02	3.38E-01	4	52	"FKBP4,TWF2,VILL,STMN1"
GO: Biological Process	DNA modification	2.27E-02	3.43E-01	5	78	"PRMT7,TET1,APOBEC1,NTHL1,DNMT1"
GO: Biological Process	regulation of vasculature development	2.29E-02	3.45E-01	9	199	"HDAC9,WT1,SFRP2,PGF,ID1,DLL4,TBXA2R,TEK,CD34"
GO: Biological Process	neurotransmitter metabolic process	2.36E-02	3.49E-01	3	30	"ABAT,ACHE,CACNA1A"
GO: Biological Process	neuron development	2.36E-02	3.49E-01	29	950	"ACHE,FGFR2,FKBP4,VLDLR,MAPT,PLXNA3,SEMA5A,PLXNB1,TRPC6,TRPC4,CSPG4,SYNE1,OBSL1,RAP2A,ROBO2,DLG4,FZD8,TWF2,RGMA,CDKL5,CACNA1A,NDN,CNTNAP1,LIMK1,EPHB1,SPR,STMN1,CDH2,EFNB1"
GO: Biological Process	regulation of growth	2.40E-02	3.49E-01	20	597	"NOD2,FDPS,FGFR2,WT1,SFRP2,MAPT,PLXNA3,CRYAB,IP6K2,RRAD,NPY1R,PHIP,ABTB2,LTBP4,TWF2,CDKL5,TCHP,NDN,LIMK1,SPR"
GO: Biological Process	adenosine receptor signaling pathway	2.45E-02	3.49E-01	2	12	"ADA,DLG4"
GO: Biological Process	negative regulation of B cell apoptotic process	2.45E-02	3.49E-01	2	12	"ADA,AURKB"
GO: Biological Process	keratan sulfate catabolic process	2.45E-02	3.49E-01	2	12	"PRELP,GLB1"
GO: Biological Process	ubiquinone metabolic process	2.45E-02	3.49E-01	2	12	"COQ5,UBIAD1"
GO: Biological Process	response to laminar fluid shear stress	2.45E-02	3.49E-01	2	12	"KLF2,NCF2"
GO: Biological Process	gamma-aminobutyric acid secretion	2.45E-02	3.49E-01	2	12	"TRPC4,CACNA1A"
GO: Biological Process	regulation of chromatin silencing	2.45E-02	3.49E-01	2	12	"TET1,APOBEC1"
GO: Biological Process	glomerular mesangium development	2.45E-02	3.49E-01	2	12	"WT1,CD34"
GO: Biological Process	T cell tolerance induction	2.45E-02	3.49E-01	2	12	"HLA-G,HLA-B"
GO: Biological Process	positive regulation of actin cytoskeleton reorganization	2.45E-02	3.49E-01	2	12	"CCL27,TEK"
GO: Biological Process	organic acid metabolic process	2.46E-02	3.49E-01	32	1075	"ABAT,PON3,HS3ST3B1,PANK1,CKB,ALDH1A3,PRELP,ASRGL1,MCEE,PET112,SDC1,GSTK1,CBR4,IDO2,FAM213B,CSPG4,MMAA,GLB1,BCAT2,SIRT4,DNMT1,IRS1,ACAD11,FADS2,PDP2,MBOAT1,CACNA1A,ALDH4A1,CD34,B4GALT4,SPR,CCBL2"
GO: Biological Process	lipoprotein metabolic process	2.47E-02	3.49E-01	6	108	"APOBEC1,SDC1,PIGA,PIGY,LDLR,LCAT"
GO: Biological Process	regulation of T cell mediated immunity	2.53E-02	3.49E-01	4	54	"NOD2,HLA-G,HLA-B,PVRL2"
GO: Biological Process	regulation of microtubule polymerization or depolymerization	2.53E-02	3.49E-01	4	54	"FKBP4,MAPT,AURKB,STMN1"
GO: Biological Process	heart development	2.56E-02	3.49E-01	16	450	"HDAC9,FDPS,FGFR2,WT1,SFRP2,ID1,DLL4,NPY1R,CBY1,OBSL1,TBX3,ITGA4,TEK,C2CD3,MTERFD2,EFNB2"
GO: Biological Process	locomotion	2.60E-02	3.49E-01	40	1411	"NOD2,HDAC9,RASGEF1A,ADA,APCDD1,CCL27,SFRP2,ABI3,MAPT,PLXNA3,SEMA5A,CEND1,ID1,PLXNB1,TRPC6,TRPC4,DLL4,CSPG4,RAP2A,CEACAM1,ROBO2,ITGA4,IRS1,DLG4,INPP5B,RGMA,TEK,CDKL5,S1PR1,STK10,LURAP1,NDN,CNTNAP1,LIMK1,CD34,EPHB1,CDH2,EFNB2,EFNB1,PVRL2"
GO: Biological Process	organophosphate metabolic process	2.60E-02	3.49E-01	42	1495	"ACHE,FDPS,FDFT1,TUBG2,ADA,PANK1,MVK,SMARCAL1,MCEE,ETNK1,PEX6,RASL12,IDI1,PLXNB1,PLCB2,IP6K2,RRAD,PIGA,TBC1D30,NTHL1,RAP2A,PIGY,TOP2A,ITPA,INPP5B,REM1,GUCY1A3,CDKL5,S1PR1,MYL4,MSH6,MBOAT1,PTH1R,NCF2,ENTPD1,LDLR,GPD2,RAB6A,LCAT,RASL11B,EIF2S3,NME3"
GO: Biological Process	renal system development	2.65E-02	3.49E-01	11	272	"FGFR2,WT1,FRAS1,PGF,SDC1,GDF11,ROBO2,ITGA8,NPHS2,PYGO1,CD34"
GO: Biological Process	ureteric bud development	2.67E-02	3.49E-01	6	110	"FGFR2,WT1,PGF,SDC1,GDF11,ROBO2"
GO: Biological Process	positive regulation of cell growth	2.67E-02	3.49E-01	6	110	"FDPS,SFRP2,MAPT,TWF2,CDKL5,LIMK1"
GO: Biological Process	regulation of T cell mediated cytotoxicity	2.79E-02	3.49E-01	3	32	"HLA-G,HLA-B,PVRL2"
GO: Biological Process	negative regulation of microtubule polymerization or depolymerization	2.79E-02	3.49E-01	3	32	"FKBP4,AURKB,STMN1"
GO: Biological Process	muscle system process	2.85E-02	3.49E-01	13	346	"FDPS,SNTB1,SNTA1,ADA,STBD1,CRYAB,NPY1R,DMPK,TBXA2R,MYL6B,DES,GUCY1A3,MYL4"
GO: Biological Process	regulation of behavior	2.85E-02	3.49E-01	8	174	"NOD2,ADA,CCL27,PLXNA3,ROBO2,DLG4,S1PR1,EFNB2"
GO: Biological Process	somatic hypermutation of immunoglobulin genes	2.86E-02	3.49E-01	2	13	"POLL,MSH6"
GO: Biological Process	hematopoietic stem cell proliferation	2.86E-02	3.49E-01	2	13	"SFRP2,CD34"
GO: Biological Process	cerebellar Purkinje cell differentiation	2.86E-02	3.49E-01	2	13	"CEND1,CACNA1A"
GO: Biological Process	metallo-sulfur cluster assembly	2.86E-02	3.49E-01	2	13	"SDHAF1,HSCB"
GO: Biological Process	iron-sulfur cluster assembly	2.86E-02	3.49E-01	2	13	"SDHAF1,HSCB"
GO: Biological Process	G-protein coupled purinergic receptor signaling pathway	2.86E-02	3.49E-01	2	13	"ADA,DLG4"
GO: Biological Process	somatic diversification of immune receptors via somatic mutation	2.86E-02	3.49E-01	2	13	"POLL,MSH6"
GO: Biological Process	cerebellar Purkinje cell layer formation	2.86E-02	3.49E-01	2	13	"CEND1,CACNA1A"
GO: Biological Process	regulation of cholesterol biosynthetic process	2.86E-02	3.49E-01	2	13	"FDPS,DHCR7"
GO: Biological Process	regulation of striated muscle cell differentiation	2.88E-02	3.49E-01	5	83	"HDAC9,FDPS,DMPK,TBX3,EFNB2"
GO: Biological Process	cell-cell adhesion	2.99E-02	3.49E-01	16	459	"ADA,UBASH3B,ICAM2,CEACAM1,TNIP1,ROBO2,ITGA4,CAMSAP3,TEK,MYCN,ITGA8,STK10,CD34,CDH2,FREM2,PVRL2"
GO: Biological Process	oxidation-reduction process	3.00E-02	3.49E-01	29	970	"FDFT1,TET1,ALDH1A3,COX4I2,PPP1R3C,MCEE,UCP2,RTN4IP1,GSTK1,CBR4,DUS4L,IDO2,FAM213B,MMAA,COIL,STEAP4,SIRT4,IRS1,ACAD11,FADS2,DHCR7,AKR7A2,CACNA1A,NDUFC1,PYGM,ALDH4A1,GPD2,SQLE,SPR"
GO: Biological Process	neuromuscular process controlling balance	3.01E-02	3.49E-01	4	57	"ALDH1A3,DLG4,CACNA1A,CNTNAP1"
GO: Biological Process	organelle assembly	3.02E-02	3.49E-01	12	313	"RCC1,CENPA,TPX2,AURKB,CEP89,CBY1,OBSL1,C2CD3,IFT80,MTERFD2,CD34,PVRL2"
GO: Biological Process	keratan sulfate metabolic process	3.03E-02	3.49E-01	3	33	"PRELP,GLB1,B4GALT4"
GO: Biological Process	epithelial cell differentiation involved in kidney development	3.03E-02	3.49E-01	3	33	"WT1,NPHS2,CD34"
GO: Biological Process	macromolecular complex assembly	3.08E-02	3.49E-01	36	1261	"PRMT7,RCC1,NOD2,ACHE,SNRPD3,TUBG2,CENPA,FKBP4,TPX2,MAPT,AURKB,CBR4,CRYAB,KCND3,NDUFAF4,SDHAF1,SLC9A3R2,IRS1,KCNRG,DLG4,HIST1H2AI,TWF2,HIST2H2BE,HIST1H2BM,TEK,PDGFC,HSCB,EHD4,EHD3,HBB,VILL,MTERFD2,KCTD21,LCAT,STMN1,CDH2"
GO: Biological Process	urogenital system development	3.08E-02	3.49E-01	12	314	"FGFR2,FKBP4,WT1,FRAS1,PGF,SDC1,GDF11,ROBO2,ITGA8,NPHS2,PYGO1,CD34"
GO: Biological Process	fatty acid oxidation	3.15E-02	3.49E-01	5	85	"MCEE,MMAA,SIRT4,IRS1,ACAD11"
GO: Biological Process	protein complex assembly	3.17E-02	3.49E-01	32	1098	"RCC1,NOD2,ACHE,TUBG2,CENPA,FKBP4,TPX2,MAPT,AURKB,CBR4,CRYAB,KCND3,NDUFAF4,SDHAF1,SLC9A3R2,IRS1,KCNRG,DLG4,HIST1H2AI,TWF2,HIST2H2BE,HIST1H2BM,TEK,PDGFC,HSCB,EHD4,EHD3,HBB,VILL,KCTD21,STMN1,CDH2"
GO: Biological Process	positive regulation of lipid metabolic process	3.23E-02	3.49E-01	6	115	"NOD2,FDPS,SIRT4,IRS1,TEK,LDLR"
GO: Biological Process	protein complex biogenesis	3.24E-02	3.49E-01	32	1100	"RCC1,NOD2,ACHE,TUBG2,CENPA,FKBP4,TPX2,MAPT,AURKB,CBR4,CRYAB,KCND3,NDUFAF4,SDHAF1,SLC9A3R2,IRS1,KCNRG,DLG4,HIST1H2AI,TWF2,HIST2H2BE,HIST1H2BM,TEK,PDGFC,HSCB,EHD4,EHD3,HBB,VILL,KCTD21,STMN1,CDH2"
GO: Biological Process	peptidyl-tyrosine phosphorylation	3.25E-02	3.49E-01	11	281	"PRMT2,NOD2,FGFR2,PDGFD,SFRP2,ABI3,CSPG4,TEK,PDGFC,EHD4,EPHB1"
GO: Biological Process	regulation of cell migration involved in sprouting angiogenesis	3.29E-02	3.49E-01	2	14	"HDAC9,DLL4"
GO: Biological Process	positive regulation of protein targeting to membrane	3.29E-02	3.49E-01	2	14	"SLC51B,C2CD5"
GO: Biological Process	tryptophan metabolic process	3.29E-02	3.49E-01	2	14	"IDO2,CCBL2"
GO: Biological Process	quinone biosynthetic process	3.29E-02	3.49E-01	2	14	"COQ5,UBIAD1"
GO: Biological Process	regulation of tolerance induction	3.29E-02	3.49E-01	2	14	"HLA-G,HLA-B"
GO: Biological Process	glycoside metabolic process	3.29E-02	3.49E-01	2	14	"CBR4,AKR7A2"
GO: Biological Process	peptidyl-arginine modification	3.29E-02	3.49E-01	2	14	"PRMT7,PRMT2"
GO: Biological Process	regulation of non-canonical Wnt signaling pathway	3.29E-02	3.49E-01	2	14	"SFRP2,IFT80"
GO: Biological Process	cardiac cell fate commitment	3.29E-02	3.49E-01	2	14	"WT1,TBX3"
GO: Biological Process	cerebellar Purkinje cell layer morphogenesis	3.29E-02	3.49E-01	2	14	"CEND1,CACNA1A"
GO: Biological Process	positive regulation of cellular response to insulin stimulus	3.29E-02	3.49E-01	2	14	"C2CD5,IRS1"
GO: Biological Process	nose development	3.29E-02	3.49E-01	2	14	"HESX1,ALDH1A3"
GO: Biological Process	glycosaminoglycan catabolic process	3.36E-02	3.49E-01	4	59	"PRELP,SDC1,CSPG4,GLB1"
GO: Biological Process	embryonic digit morphogenesis	3.36E-02	3.49E-01	4	59	"SFRP2,TBX3,MYCN,C2CD3"
GO: Biological Process	outflow tract morphogenesis	3.36E-02	3.49E-01	4	59	"FGFR2,SFRP2,NPY1R,TBX3"
GO: Biological Process	peptidyl-tyrosine modification	3.40E-02	3.49E-01	11	283	"PRMT2,NOD2,FGFR2,PDGFD,SFRP2,ABI3,CSPG4,TEK,PDGFC,EHD4,EPHB1"
GO: Biological Process	lipid oxidation	3.43E-02	3.49E-01	5	87	"MCEE,MMAA,SIRT4,IRS1,ACAD11"
GO: Biological Process	morphogenesis of a branching epithelium	3.43E-02	3.49E-01	9	214	"FGFR2,WT1,SFRP2,PGF,SEMA5A,DLL4,TBX3,TEK,MYCN"
GO: Biological Process	cell adhesion	3.44E-02	3.49E-01	30	1023	"ACHE,ADA,SFRP2,CCDC80,SEMA5A,UBASH3B,ICAM2,SERPINI1,CEACAM1,TNIP1,ROBO2,ITGA4,CAMSAP3,TEK,MYCN,ITGA8,S1PR1,STK10,SNED1,POSTN,PPFIA2,CNTNAP1,ENTPD1,CD34,EPHB1,CDH2,FREM2,EFNB2,EFNB1,PVRL2"
GO: Biological Process	cardiocyte differentiation	3.47E-02	3.49E-01	6	117	"FDPS,WT1,CBY1,OBSL1,TBX3,EFNB2"
GO: Biological Process	cellular amino acid catabolic process	3.47E-02	3.49E-01	6	117	"ABAT,ASRGL1,IDO2,BCAT2,ALDH4A1,CCBL2"
GO: Biological Process	regulation of angiogenesis	3.48E-02	3.49E-01	8	181	"HDAC9,SFRP2,PGF,ID1,DLL4,TBXA2R,TEK,CD34"
GO: Biological Process	chromatin silencing	3.52E-02	3.49E-01	3	35	"TET1,APOBEC1,SIRT4"
GO: Biological Process	microtubule-based process	3.53E-02	3.49E-01	17	507	"RCC1,TUBG2,CENPA,FKBP4,TPX2,MAP6,MAPT,AURKB,CRYAB,PLK1S1,CAMSAP3,KLHL42,IFT80,RABL5,CNTNAP1,RAB6A,STMN1"
GO: Biological Process	regulation of synapse organization	3.54E-02	3.49E-01	4	60	"ARHGEF15,DMPK,ROBO2,EPHB1"
GO: Biological Process	biological adhesion	3.63E-02	3.49E-01	30	1028	"ACHE,ADA,SFRP2,CCDC80,SEMA5A,UBASH3B,ICAM2,SERPINI1,CEACAM1,TNIP1,ROBO2,ITGA4,CAMSAP3,TEK,MYCN,ITGA8,S1PR1,STK10,SNED1,POSTN,PPFIA2,CNTNAP1,ENTPD1,CD34,EPHB1,CDH2,FREM2,EFNB2,EFNB1,PVRL2"
GO: Biological Process	cell migration	3.63E-02	3.49E-01	29	987	"NOD2,HDAC9,RASGEF1A,ADA,APCDD1,CCL27,SFRP2,ABI3,MAPT,CEND1,ID1,PLXNB1,DLL4,CSPG4,RAP2A,CEACAM1,ITGA4,IRS1,TEK,CDKL5,S1PR1,STK10,LURAP1,NDN,CD34,EPHB1,CDH2,EFNB2,EFNB1"
GO: Biological Process	cellular modified amino acid metabolic process	3.70E-02	3.49E-01	9	217	"PANK1,CKB,GSTK1,IDO2,DNMT1,MBOAT1,CACNA1A,ALDH4A1,CCBL2"
GO: Biological Process	gamma-aminobutyric acid transport	3.75E-02	3.49E-01	2	15	"TRPC4,CACNA1A"
GO: Biological Process	cell differentiation involved in metanephros development	3.75E-02	3.49E-01	2	15	"NPHS2,CD34"
GO: Biological Process	blastoderm segmentation	3.75E-02	3.49E-01	2	15	"WT1,TBX3"
GO: Biological Process	"positive regulation of gene expression, epigenetic"	3.75E-02	3.49E-01	2	15	"TET1,APOBEC1"
GO: Biological Process	tripartite regional subdivision	3.75E-02	3.49E-01	2	15	"WT1,TBX3"
GO: Biological Process	"anterior/posterior axis specification, embryo"	3.75E-02	3.49E-01	2	15	"WT1,TBX3"
GO: Biological Process	short-chain fatty acid metabolic process	3.75E-02	3.49E-01	2	15	"MCEE,MMAA"
GO: Biological Process	appendage morphogenesis	3.77E-02	3.49E-01	7	151	"FGFR2,SFRP2,MUSTN1,FRAS1,TBX3,MYCN,C2CD3"
GO: Biological Process	limb morphogenesis	3.77E-02	3.49E-01	7	151	"FGFR2,SFRP2,MUSTN1,FRAS1,TBX3,MYCN,C2CD3"
GO: Biological Process	developmental growth	3.78E-02	3.49E-01	12	324	"PRMT2,FDPS,FGFR2,WT1,SFRP2,MUSTN1,MAPT,PLXNA3,TWF2,CDKL5,NDN,LIMK1"
GO: Biological Process	trabecula morphogenesis	3.79E-02	3.49E-01	3	36	"PLXNB1,DLL4,TEK"
GO: Biological Process	negative regulation of insulin secretion	3.79E-02	3.49E-01	3	36	"UCP2,SIRT4,IRS1"
GO: Biological Process	generation of neurons	3.86E-02	3.49E-01	36	1284	"ACHE,FGFR2,FKBP4,XRCC5,CDK5RAP1,VLDLR,MAPT,PLXNA3,SEMA5A,CEND1,PLXNB1,TRPC6,TRPC4,DLL4,GDF11,CSPG4,SYNE1,OBSL1,RAP2A,ROBO2,DLG4,FZD8,TWF2,RGMA,MYCN,CDKL5,S1PR1,CACNA1A,NDN,CNTNAP1,LIMK1,EPHB1,SPR,STMN1,CDH2,EFNB1"
GO: Biological Process	microtubule-based transport	3.88E-02	3.49E-01	5	90	"MAPT,IFT80,RABL5,CNTNAP1,RAB6A"
GO: Biological Process	developmental maturation	3.89E-02	3.49E-01	9	219	"ARHGEF15,CEND1,PLXNB1,GDF11,CSPG4,KLF2,DLG4,CACNA1A,PTH1R"
GO: Biological Process	carbohydrate derivative catabolic process	3.90E-02	3.49E-01	25	830	"TUBG2,ADA,PRELP,SMARCAL1,PEX6,APOBEC1,RASL12,SDC1,PLXNB1,CSPG4,RRAD,GLB1,TBC1D30,NTHL1,RAP2A,TOP2A,ITPA,REM1,CDKL5,S1PR1,MSH6,ENTPD1,RAB6A,RASL11B,EIF2S3"
GO: Biological Process	phospholipid biosynthetic process	3.98E-02	3.49E-01	9	220	"ACHE,FDPS,MVK,ETNK1,IDI1,PIGA,PIGY,MBOAT1,LCAT"
GO: Biological Process	regulation of phosphatidylinositol 3-kinase activity	4.06E-02	3.49E-01	3	37	"NOD2,IRS1,TEK"
GO: Biological Process	acetylcholine catabolic process	4.09E-02	3.49E-01	1	2	ACHE
GO: Biological Process	response to defense-related host nitric oxide production	4.09E-02	3.49E-01	1	2	GUCY1A3
GO: Biological Process	regulation of apoptotic process in bone marrow	4.09E-02	3.49E-01	1	2	FGFR2
GO: Biological Process	branch elongation involved in salivary gland morphogenesis	4.09E-02	3.49E-01	1	2	FGFR2
GO: Biological Process	regulation of granulocyte colony-stimulating factor production	4.09E-02	3.49E-01	1	2	CD34
GO: Biological Process	regulation of antimicrobial peptide production	4.09E-02	3.49E-01	1	2	NOD2
GO: Biological Process	squamous basal epithelial stem cell differentiation involved in prostate gland acinus development	4.09E-02	3.49E-01	1	2	FGFR2
GO: Biological Process	metanephric mesangial cell differentiation	4.09E-02	3.49E-01	1	2	CD34
GO: Biological Process	sinoatrial node cell differentiation	4.09E-02	3.49E-01	1	2	TBX3
GO: Biological Process	geranyl diphosphate metabolic process	4.09E-02	3.49E-01	1	2	FDPS
GO: Biological Process	geranyl diphosphate biosynthetic process	4.09E-02	3.49E-01	1	2	FDPS
GO: Biological Process	semaphorin-plexin signaling pathway involved in bone trabecula morphogenesis	4.09E-02	3.49E-01	1	2	PLXNB1
GO: Biological Process	negative regulation of cerebellar granule cell precursor proliferation	4.09E-02	3.49E-01	1	2	CEND1
GO: Biological Process	cytidine to uridine editing	4.09E-02	3.49E-01	1	2	APOBEC1
GO: Biological Process	gamma-aminobutyric acid catabolic process	4.09E-02	3.49E-01	1	2	ABAT
GO: Biological Process	granulocyte colony-stimulating factor production	4.09E-02	3.49E-01	1	2	CD34
GO: Biological Process	thorax and anterior abdomen determination	4.09E-02	3.49E-01	1	2	WT1
GO: Biological Process	pathogen-associated molecular pattern dependent induction by organism of innate immune response of other organism involved in symbiotic interaction	4.09E-02	3.49E-01	1	2	NOD2
GO: Biological Process	coumarin catabolic process	4.09E-02	3.49E-01	1	2	PON3
GO: Biological Process	modulation by organism of innate immune response in other organism involved in symbiotic interaction	4.09E-02	3.49E-01	1	2	NOD2
GO: Biological Process	purine deoxyribonucleoside catabolic process	4.09E-02	3.49E-01	1	2	ADA
GO: Biological Process	antigen processing and presentation of endogenous peptide antigen via MHC class I via ER pathway	4.09E-02	3.49E-01	1	2	HLA-B
GO: Biological Process	mesenchymal cell differentiation involved in lung development	4.09E-02	3.49E-01	1	2	FGFR2
GO: Biological Process	positive regulation of biosynthetic process of antibacterial peptides active against Gram-positive bacteria	4.09E-02	3.49E-01	1	2	NOD2
GO: Biological Process	positive regulation by symbiont of host innate immune response	4.09E-02	3.49E-01	1	2	NOD2
GO: Biological Process	orbitofrontal cortex development	4.09E-02	3.49E-01	1	2	FGFR2
GO: Biological Process	radial glia guided migration of cerebellar granule cell	4.09E-02	3.49E-01	1	2	CEND1
GO: Biological Process	dATP catabolic process	4.09E-02	3.49E-01	1	2	ADA
GO: Biological Process	biosynthetic process of antibacterial peptides active against Gram-positive bacteria	4.09E-02	3.49E-01	1	2	NOD2
GO: Biological Process	antibacterial peptide biosynthetic process	4.09E-02	3.49E-01	1	2	NOD2
GO: Biological Process	response to defense-related nitric oxide production by other organism involved in symbiotic interaction	4.09E-02	3.49E-01	1	2	GUCY1A3
GO: Biological Process	positive regulation of granulocyte colony-stimulating factor production	4.09E-02	3.49E-01	1	2	CD34
GO: Biological Process	regulation of biosynthetic process of antibacterial peptides active against Gram-positive bacteria	4.09E-02	3.49E-01	1	2	NOD2
GO: Biological Process	neurotransmitter receptor biosynthetic process	4.09E-02	3.49E-01	1	2	ACHE
GO: Biological Process	fibroblast growth factor receptor signaling pathway involved in mammary gland specification	4.09E-02	3.49E-01	1	2	FGFR2
GO: Biological Process	xanthine metabolic process	4.09E-02	3.49E-01	1	2	ADA
GO: Biological Process	fibroblast growth factor receptor signaling pathway involved in orbitofrontal cortex development	4.09E-02	3.49E-01	1	2	FGFR2
GO: Biological Process	farnesyl diphosphate biosynthetic process	4.09E-02	3.49E-01	1	2	FDPS
GO: Biological Process	regulation of metanephric ureteric bud development	4.09E-02	3.49E-01	1	2	WT1
GO: Biological Process	myoblast development	4.09E-02	3.49E-01	1	2	SDC1
GO: Biological Process	dimethylallyl diphosphate metabolic process	4.09E-02	3.49E-01	1	2	IDI1
GO: Biological Process	regulation of interleukin-2 secretion	4.09E-02	3.49E-01	1	2	CD34
GO: Biological Process	His-Purkinje system cell differentiation	4.09E-02	3.49E-01	1	2	TBX3
GO: Biological Process	positive regulation of antibacterial peptide biosynthetic process	4.09E-02	3.49E-01	1	2	NOD2
GO: Biological Process	adrenal cortex development	4.09E-02	3.49E-01	1	2	WT1
GO: Biological Process	metanephric glomerular mesangial cell differentiation	4.09E-02	3.49E-01	1	2	CD34
GO: Biological Process	mesangial cell-matrix adhesion	4.09E-02	3.49E-01	1	2	CD34
GO: Biological Process	activation of MAPK activity involved in innate immune response	4.09E-02	3.49E-01	1	2	NOD2
GO: Biological Process	susceptibility to T cell mediated cytotoxicity	4.09E-02	3.49E-01	1	2	PVRL2
GO: Biological Process	regulation of antibacterial peptide biosynthetic process	4.09E-02	3.49E-01	1	2	NOD2
GO: Biological Process	positive regulation of metanephric ureteric bud development	4.09E-02	3.49E-01	1	2	WT1
GO: Biological Process	"antigen processing and presentation of endogenous peptide antigen via MHC class I via ER pathway, TAP-dependent"	4.09E-02	3.49E-01	1	2	HLA-B
GO: Biological Process	regulation of metanephric glomerular mesangial cell proliferation	4.09E-02	3.49E-01	1	2	WT1
GO: Biological Process	ITP metabolic process	4.09E-02	3.49E-01	1	2	ITPA
GO: Biological Process	regulation of cellular response to heat	4.09E-02	3.49E-01	1	2	CD34
GO: Biological Process	positive regulation by organism of innate immune response in other organism involved in symbiotic interaction	4.09E-02	3.49E-01	1	2	NOD2
GO: Biological Process	regulation of macrophage colony-stimulating factor production	4.09E-02	3.49E-01	1	2	CD34
GO: Biological Process	positive regulation of macrophage colony-stimulating factor production	4.09E-02	3.49E-01	1	2	CD34
GO: Biological Process	neural plate axis specification	4.09E-02	3.49E-01	1	2	C2CD3
GO: Biological Process	paracrine signaling	4.09E-02	3.49E-01	1	2	CD34
GO: Biological Process	tRNA 3'-trailer cleavage	4.09E-02	3.49E-01	1	2	ELAC2
GO: Biological Process	positive regulation of glucagon secretion	4.09E-02	3.49E-01	1	2	IRS1
GO: Biological Process	"negative regulation of circadian sleep/wake cycle, non-REM sleep"	4.09E-02	3.49E-01	1	2	ADA
GO: Biological Process	negative regulation of interleukin-2 secretion	4.09E-02	3.49E-01	1	2	CD34
GO: Biological Process	blood vessel lumenization	4.09E-02	3.49E-01	1	2	DLL4
GO: Biological Process	mammary gland bud formation	4.09E-02	3.49E-01	1	2	FGFR2
GO: Biological Process	modulation by symbiont of host innate immune response	4.09E-02	3.49E-01	1	2	NOD2
GO: Biological Process	pathogen-associated molecular pattern dependent induction by symbiont of host innate immune response	4.09E-02	3.49E-01	1	2	NOD2
GO: Biological Process	"peptidyl-arginine methylation, to symmetrical-dimethyl arginine"	4.09E-02	3.49E-01	1	2	PRMT7
GO: Biological Process	negative regulation of synapse maturation	4.09E-02	3.49E-01	1	2	ARHGEF15
GO: Biological Process	positive regulation of mononuclear cell migration	4.09E-02	3.49E-01	1	2	CCL27
GO: Biological Process	pathogen-associated molecular pattern dependent modulation by symbiont of host innate immune response	4.09E-02	3.49E-01	1	2	NOD2
GO: Biological Process	adrenal cortex formation	4.09E-02	3.49E-01	1	2	WT1
GO: Biological Process	posterior mesonephric tubule development	4.09E-02	3.49E-01	1	2	WT1
GO: Biological Process	regulation of high-density lipoprotein particle assembly	4.09E-02	3.49E-01	1	2	LCAT
GO: Biological Process	regulation of adenosine receptor signaling pathway	4.09E-02	3.49E-01	1	2	ADA
GO: Biological Process	cellular hyperosmotic salinity response	4.09E-02	3.49E-01	1	2	XRCC5
GO: Biological Process	acetylcholine catabolic process in synaptic cleft	4.09E-02	3.49E-01	1	2	ACHE
GO: Biological Process	positive regulation of antimicrobial peptide biosynthetic process	4.09E-02	3.49E-01	1	2	NOD2
GO: Biological Process	branched-chain amino acid biosynthetic process	4.09E-02	3.49E-01	1	2	BCAT2
GO: Biological Process	vestibular nucleus development	4.09E-02	3.49E-01	1	2	CACNA1A
GO: Biological Process	dimethylallyl diphosphate biosynthetic process	4.09E-02	3.49E-01	1	2	IDI1
GO: Biological Process	regulation of antimicrobial peptide biosynthetic process	4.09E-02	3.49E-01	1	2	NOD2
GO: Biological Process	pathogen-associated molecular pattern dependent modulation by organism of innate immune response in other organism involved in symbiotic interaction	4.09E-02	3.49E-01	1	2	NOD2
GO: Biological Process	negative regulation of apoptotic process in bone marrow	4.09E-02	3.49E-01	1	2	FGFR2
GO: Biological Process	regulation of antibacterial peptide production	4.09E-02	3.49E-01	1	2	NOD2
GO: Biological Process	sperm mitochondrion organization	4.09E-02	3.49E-01	1	2	PVRL2
GO: Biological Process	macrophage inflammatory protein-1 alpha production	4.09E-02	3.49E-01	1	2	NOD2
GO: Biological Process	cerebellar cortex maturation	4.09E-02	3.49E-01	1	2	CEND1
GO: Biological Process	negative regulation of negative chemotaxis	4.09E-02	3.49E-01	1	2	ROBO2
GO: Biological Process	negative regulation of embryonic development	4.09E-02	3.49E-01	1	2	SFRP2
GO: Biological Process	macrophage colony-stimulating factor production	4.09E-02	3.49E-01	1	2	CD34
GO: Biological Process	antimicrobial peptide biosynthetic process	4.09E-02	3.49E-01	1	2	NOD2
GO: Biological Process	negative regulation of mucus secretion	4.09E-02	3.49E-01	1	2	ADA
GO: Biological Process	response to reactive oxygen species	4.12E-02	3.49E-01	7	154	"ADA,UCP2,SDC1,TRPC6,CRYAB,KLF2,HBB"
GO: Biological Process	regulation of chemotaxis	4.12E-02	3.49E-01	6	122	"NOD2,CCL27,PLXNA3,ROBO2,S1PR1,EFNB2"
GO: Biological Process	nitric oxide biosynthetic process	4.13E-02	3.49E-01	4	63	"HLA-G,HBB,CD34,SPR"
GO: Biological Process	DNA methylation or demethylation	4.13E-02	3.49E-01	4	63	"PRMT7,TET1,APOBEC1,DNMT1"
GO: Biological Process	lipid biosynthetic process	4.18E-02	3.49E-01	19	596	"ACHE,FDPS,FDFT1,MVK,ALDH1A3,ETNK1,C14orf1,IDI1,CBR4,FAM213B,PIGA,PIGY,SIRT4,FADS2,DHCR7,MBOAT1,LDLR,SQLE,LCAT"
GO: Biological Process	spindle organization	4.20E-02	3.49E-01	5	92	"RCC1,TPX2,AURKB,PLK1S1,STMN1"
GO: Biological Process	locomotory behavior	4.21E-02	3.49E-01	8	188	"ABAT,ALDH1A3,MAPT,CEND1,NPY1R,DLG4,CACNA1A,NPAS2"
GO: Biological Process	peptidyl-cysteine modification	4.23E-02	3.49E-01	2	16	"SNTA1,RAB6A"
GO: Biological Process	positive regulation of B cell mediated immunity	4.23E-02	3.49E-01	2	16	"NOD2,PVRL2"
GO: Biological Process	renal filtration cell differentiation	4.23E-02	3.49E-01	2	16	"WT1,NPHS2"
GO: Biological Process	glomerular visceral epithelial cell differentiation	4.23E-02	3.49E-01	2	16	"WT1,NPHS2"
GO: Biological Process	positive regulation of immunoglobulin mediated immune response	4.23E-02	3.49E-01	2	16	"NOD2,PVRL2"
GO: Biological Process	negative regulation of reactive oxygen species metabolic process	4.23E-02	3.49E-01	2	16	"CRYAB,MYCN"
GO: Biological Process	cellular anion homeostasis	4.23E-02	3.49E-01	2	16	"CKB,CACNA1A"
GO: Biological Process	amine catabolic process	4.23E-02	3.49E-01	2	16	"IDO2,CCBL2"
GO: Biological Process	coenzyme A metabolic process	4.23E-02	3.49E-01	2	16	"PANK1,MCEE"
GO: Biological Process	endocytic recycling	4.23E-02	3.49E-01	2	16	"EHD4,EHD3"
GO: Biological Process	otic vesicle development	4.23E-02	3.49E-01	2	16	"HESX1,FGFR2"
GO: Biological Process	DNA demethylation	4.23E-02	3.49E-01	2	16	"TET1,APOBEC1"
GO: Biological Process	cellular biogenic amine catabolic process	4.23E-02	3.49E-01	2	16	"IDO2,CCBL2"
GO: Biological Process	cilium organization	4.26E-02	3.51E-01	6	123	"CEP89,CBY1,C2CD3,IFT80,RABL5,PVRL2"
GO: Biological Process	response to oxygen levels	4.27E-02	3.51E-01	10	258	"ABAT,PRMT2,ADA,VLDLR,PGF,UCP2,CRYAB,NCF2,PYGM,CD34"
GO: Biological Process	blood vessel endothelial cell migration	4.33E-02	3.52E-01	4	64	"HDAC9,ID1,DLL4,EFNB2"
GO: Biological Process	positive regulation of stem cell proliferation	4.33E-02	3.52E-01	4	64	"FGFR2,TBX3,IRS1,MYCN"
GO: Biological Process	fatty acid beta-oxidation	4.33E-02	3.52E-01	4	64	"MCEE,MMAA,IRS1,ACAD11"
GO: Biological Process	multicellular organismal movement	4.34E-02	3.52E-01	3	38	"DMPK,CACNA1A,SPR"
GO: Biological Process	embryonic axis specification	4.34E-02	3.52E-01	3	38	"WT1,TBX3,C2CD3"
GO: Biological Process	musculoskeletal movement	4.34E-02	3.52E-01	3	38	"DMPK,CACNA1A,SPR"
GO: Biological Process	alpha-amino acid catabolic process	4.37E-02	3.54E-01	5	93	"ASRGL1,IDO2,BCAT2,ALDH4A1,CCBL2"
GO: Biological Process	regulation of cell size	4.54E-02	3.65E-01	5	94	"MAPT,PLXNA3,TWF2,CDKL5,LIMK1"
GO: Biological Process	glutamine family amino acid metabolic process	4.55E-02	3.65E-01	4	65	"ASRGL1,SIRT4,ALDH4A1,CD34"
GO: Biological Process	lipoprotein biosynthetic process	4.55E-02	3.65E-01	4	65	"APOBEC1,PIGA,PIGY,LCAT"
GO: Biological Process	positive regulation of lymphocyte mediated immunity	4.55E-02	3.65E-01	4	65	"NOD2,HLA-G,HLA-B,PVRL2"
GO: Biological Process	cellular amino acid metabolic process	4.56E-02	3.65E-01	16	485	"ABAT,PANK1,CKB,ASRGL1,PET112,GSTK1,IDO2,BCAT2,SIRT4,DNMT1,MBOAT1,CACNA1A,ALDH4A1,CD34,SPR,CCBL2"
GO: Biological Process	morphogenesis of a branching structure	4.59E-02	3.67E-01	9	226	"FGFR2,WT1,SFRP2,PGF,SEMA5A,DLL4,TBX3,TEK,MYCN"
GO: Biological Process	negative regulation of cell growth	4.62E-02	3.67E-01	7	158	"WT1,SFRP2,PLXNA3,CRYAB,IP6K2,RRAD,TCHP"
GO: Biological Process	steroid biosynthetic process	4.62E-02	3.67E-01	7	158	"FDPS,FDFT1,MVK,C14orf1,IDI1,DHCR7,SQLE"
GO: Biological Process	muscle filament sliding	4.63E-02	3.67E-01	3	39	"MYL6B,DES,MYL4"
GO: Biological Process	positive regulation of mesenchymal cell proliferation	4.63E-02	3.67E-01	3	39	"FGFR2,IRS1,MYCN"
GO: Biological Process	glycosyl compound metabolic process	4.64E-02	3.67E-01	26	886	"TUBG2,ADA,PANK1,SMARCAL1,MCEE,PEX6,APOBEC1,RASL12,PLXNB1,CBR4,RRAD,TBC1D30,RAP2A,TOP2A,DNMT1,REM1,CDKL5,S1PR1,MYL4,MSH6,AKR7A2,ENTPD1,RAB6A,RASL11B,EIF2S3,NME3"
GO: Biological Process	microtubule cytoskeleton organization	4.66E-02	3.67E-01	12	335	"RCC1,TUBG2,CENPA,FKBP4,TPX2,MAP6,MAPT,AURKB,CRYAB,PLK1S1,CAMSAP3,STMN1"
GO: Biological Process	cytoskeleton-dependent intracellular transport	4.72E-02	3.67E-01	5	95	"MAPT,IFT80,RABL5,CNTNAP1,RAB6A"
GO: Biological Process	muscle cell fate commitment	4.73E-02	3.67E-01	2	17	"WT1,TBX3"
GO: Biological Process	deoxyribonucleotide catabolic process	4.73E-02	3.67E-01	2	17	"ADA,NTHL1"
GO: Biological Process	forebrain neuron development	4.73E-02	3.67E-01	2	17	"FGFR2,PLXNA3"
GO: Biological Process	negative chemotaxis	4.73E-02	3.67E-01	2	17	"PLXNA3,ROBO2"
GO: Biological Process	glomerular epithelial cell differentiation	4.73E-02	3.67E-01	2	17	"WT1,NPHS2"
GO: Biological Process	regulation of cardiac muscle cell differentiation	4.73E-02	3.67E-01	2	17	"FDPS,EFNB2"
GO: Biological Process	glomerular epithelium development	4.73E-02	3.67E-01	2	17	"WT1,NPHS2"
GO: Biological Process	cell division	4.73E-02	3.67E-01	19	605	"RCC1,FGFR2,PDGFD,PARD6G,TPX2,SFRP2,CKS1B,PGF,MCM5,AURKB,PHIP,PBK,TOP2A,MAD1L1,PDGFC,KLHL42,CCNA2,CCND2,PTN"
GO: Biological Process	aminoglycan catabolic process	4.76E-02	3.67E-01	4	66	"PRELP,SDC1,CSPG4,GLB1"
GO: Biological Process	inositol phosphate metabolic process	4.76E-02	3.67E-01	4	66	"PLCB2,IP6K2,INPP5B,PTH1R"
GO: Biological Process	regulation of synapse structure and activity	4.76E-02	3.67E-01	4	66	"ARHGEF15,DMPK,ROBO2,EPHB1"
GO: Biological Process	positive regulation of cell projection organization	4.78E-02	3.67E-01	8	193	"VLDLR,MAPT,PLXNB1,OBSL1,ROBO2,TWF2,CDKL5,LIMK1"
GO: Biological Process	cellular ketone metabolic process	4.80E-02	3.69E-01	9	228	"CBR4,IDO2,SIRT4,IRS1,PDP2,COQ5,AKR7A2,UBIAD1,CCBL2"
GO: Biological Process	terpenoid metabolic process	4.90E-02	3.70E-01	5	96	"FDPS,FDFT1,ALDH1A3,SDC1,LDLR"
GO: Biological Process	actin-myosin filament sliding	4.94E-02	3.70E-01	3	40	"MYL6B,DES,MYL4"
GO: Biological Process	positive regulation of T cell mediated immunity	4.94E-02	3.70E-01	3	40	"HLA-G,HLA-B,PVRL2"
GO: Biological Process	sulfur compound catabolic process	4.94E-02	3.70E-01	3	40	"PRELP,CSPG4,GLB1"
GO: Biological Process	"negative regulation of gene expression, epigenetic"	4.94E-02	3.70E-01	3	40	"TET1,APOBEC1,SIRT4"
GO: Biological Process	phosphatidylcholine metabolic process	4.99E-02	3.70E-01	4	67	"ACHE,MBOAT1,LDLR,LCAT"
GO: Biological Process	positive regulation of leukocyte mediated immunity	4.99E-02	3.70E-01	4	67	"NOD2,HLA-G,HLA-B,PVRL2"
GO: Biological Process	negative regulation of hormone secretion	4.99E-02	3.70E-01	4	67	"UCP2,NPY1R,SIRT4,IRS1"
