# Supplementary material for: Pathogenic pathways are activated in each major cell type of the glomerulus in the Cd2ap mutant mouse model of focal segmental glomerulosclerosis
Source: BMC Nephrol. 2015 May 13;16:71. doi: 10.1186/s12882-015-0063-z (PMC4430919; doi:10.1186/s12882-015-0063-z)
Supplement: Additional file 8: Table S8. — RNA-seq defined genes upregulated in Cd2ap mutant podocytes. Fold change > 2.0. Columns show gene symbol, fold change, Gene ID, RPKM in mutant, RPKM in wild type and gene position as determined by chromosome, start and end, gene description. [file 12882_2015_63_MOESM8_ESM.xls]

Gene symbol	Fold Change	Gene Description	RNA-seq FC	Transcripts Cluster Id
Prss23	6.642888	"protease, serine, 23"	11.27	10554814
Bhlhe41	3.90453	"basic helix-loop-helix family, member e41"	4.6	10549276
Pamr1	3.2672474	peptidase domain containing associated with muscle regeneration 1	4.7	10474129
Atp1b1	3.2671452	"ATPase, Na+/K+ transporting, beta 1 polypeptide"	5.3	10359689
Fkbp5	3.2349129	FK506 binding protein 5	13.45	10449452
Tgtp1|Tgtp2|Gm12185	3.2280324	T-cell specific GTPase 1 | T-cell specific GTPase 2 | predicted gene 12185	38.8	10385518
Nell2	3.1551836	NEL-like 2 (chicken)	4.24	10431812
Prss23	3.1002567	"protease, serine, 23"	11.27	10565456
Ren1|Ren2	3.0978675	renin 1 structural | renin 2 tandem duplication of Ren1	4.91	10349922
2010109K11Rik	2.6975713	RIKEN cDNA 2010109K11 gene		10395252
Irgm1	2.6113577	immunity-related GTPase family M member 1	9.56	10385500
Agap1	2.4462662	"ArfGAP with GTPase domain, ankyrin repeat and PH domain 1"	6.45	10348432
Cyr61	2.4112003	cysteine rich protein 61	2.79	10502655
Tsc22d3	2.3112943	"TSC22 domain family, member 3"	6.18	10606989
Ptprv	2.3007925	"protein tyrosine phosphatase, receptor type, V"	8.08	10357986
Lgals1	2.3002563	"lectin, galactose binding, soluble 1"	4.2	10425161
Cldn1	2.2930307	claudin 1	7.28	10438769
Tshb	2.263189	"thyroid stimulating hormone, beta subunit"	not validated	10500748
Irgm2|Igtp	2.1746197	immunity-related GTPase family M member 2 | interferon gamma induced GTPase	2.3	10376326
Gbp2	2.1041834	guanylate binding protein 2	5.37	10496592
	2.0343347			10419469
H2-K1	2.0003154	"histocompatibility 2, K1, K region"	1.83	10450075
Dbp|Sphk2	1.9754105	D site albumin promoter binding protein | sphingosine kinase 2	18.55	10553092
Col12a1	1.9600371	"collagen, type XII, alpha 1"	3.16	10595211
Slc6a6	1.9554474	"solute carrier family 6 (neurotransmitter transporter, taurine), member 6"	2.94	10540122
Frem1	1.9376695	Fras1 related extracellular matrix protein 1	9.99	10514088
Mustn1	1.9155002	"musculoskeletal, embryonic nuclear protein 1"	3.65	10413609
Axl	1.8859062	AXL receptor tyrosine kinase	3.37	10561104
Gm13375	1.8806193	predicted gene 13375		10469609
Hrct1	1.8357233	histidine rich carboxyl terminus 1	5.16	10504417
Net1	1.8181132	neuroepithelial cell transforming gene 1	5.53	10407420
Plp2	1.817916	proteolipid protein 2	not validated	10473022
Egr1	1.8061875	early growth response 1	2.03	10454782
Chst1	1.7923676	carbohydrate (keratan sulfate Gal-6) sulfotransferase 1	1.53	10474045
Iqgap1	1.7745391	IQ motif containing GTPase activating protein 1	2.15	10565018
Csrp1	1.7643557	cysteine and glycine-rich protein 1	3.06	10350136
Glt25d2	1.7411336	glycosyltransferase 25 domain containing 2	3.73	10350668
Endou	1.7330387	"endonuclease, polyU-specific"	2.84	10431962
Pdk4	1.7318249	"pyruvate dehydrogenase kinase, isoenzyme 4"	6.59	10543017
Peg3	1.723616	paternally expressed 3	2.23	10559796
Plekhf1	1.721114	"pleckstrin homology domain containing, family F (with FYVE domain) member 1"	2.7	10562576
Tnfrsf12a	1.7160572	"tumor necrosis factor receptor superfamily, member 12a"	not validated	10448307
Gdap10	1.7151119	ganglioside-induced differentiation-associated-protein 10	not validated	10395273
Tubb6	1.6988504	"tubulin, beta 6"	1.26	10456400
Nexn	1.6977681	nexilin	1.56	10502830
Tap1	1.6939905	"transporter 1, ATP-binding cassette, sub-family B (MDR/TAP)"	2.17	10444244
Ankrd1	1.6886694	ankyrin repeat domain 1 (cardiac muscle)	2.56	10467191
	1.6779749			10549877
Sorbs3	1.6775813	sorbin and SH3 domain containing 3	1.93	10421269
Pcbd1	1.6746869	pterin 4 alpha carbinolamine dehydratase/dimerization cofactor of hepatocyte nuclear factor 1 alpha (TCF1) 1	1.33	10363455
Actn1	1.6686883	"actinin, alpha 1"	2.87	10401244
Gins4	1.6532538	GINS complex subunit 4 (Sld5 homolog)	1.1	10577623
Nfkbia	1.6441444	"nuclear factor of kappa light polypeptide gene enhancer in B-cells inhibitor, alpha"	4.36	10400405
Tes	1.6415671	testis derived transcript	4.39	10536483
Srgap3	1.6413953	SLIT-ROBO Rho GTPase activating protein 3	5.11	10546853
Ctgf	1.6334025	connective tissue growth factor	2.63	10362201
Serinc5	1.6314809	serine incorporator 5	2.25	10406598
Uap1l1	1.6280576	UDP-N-acteylglucosamine pyrophosphorylase 1-like 1	1.66	10480714
Ptrf	1.6086566	polymerase I and transcript release factor	2.48	10391332
Fads2	1.6086335	fatty acid desaturase 2	2.8	10465895
Stap2	1.6040357	signal transducing adaptor family member 2	not validated	10451893
Tmem189	1.595269	transmembrane protein 189	1.76	10489912
	1.5937742			10361616
Igsf9b	1.586366	"immunoglobulin superfamily, member 9B"	5.01	10583992
	1.582395			10490248
Fgl2	1.5812955	fibrinogen-like protein 2	1.41	10519983
	1.5797403			10479185
Ccdc3	1.5697846	coiled-coil domain containing 3	1.63	10469066
Inf2	1.5590689	"inverted formin, FH2 and WH2 domain containing"	2.26	10398831
Sbsn	1.5491074	suprabasin	not validated	10552037
Ddah1	1.5377423	dimethylarginine dimethylaminohydrolase 1	2.14	10496727
Cd82	1.5359261	CD82 antigen	1.9	10485213
Filip1	1.5353128	filamin A interacting protein 1	not validated	10595298
Cxcl1	1.5303798	chemokine (C-X-C motif) ligand 1	39.22	10523151
Ifi30	1.5214577	interferon gamma inducible protein 30	2.25	10579347
Pcgf2	1.5154399	polycomb group ring finger 2	1.21	10390458
Map3k8	1.5152792	mitogen-activated protein kinase kinase kinase 8	2.44	10457225
Ndrg1	1.5140626	N-myc downstream regulated gene 1	2.24	10429140
Adm	1.5140265	adrenomedullin	1.26	10556297
Ddx26b	1.5032326	DEAD/H (Asp-Glu-Ala-Asp/His) box polypeptide 26B	1.47	10599696
