# Supplementary material for: Pathogenic pathways are activated in each major cell type of the glomerulus in the Cd2ap mutant mouse model of focal segmental glomerulosclerosis
Source: BMC Nephrol. 2015 May 13;16:71. doi: 10.1186/s12882-015-0063-z (PMC4430919; doi:10.1186/s12882-015-0063-z)
Supplement: Additional file 10: Table S10. — Functional enrichment analysis of genes with higher expression in Cd2ap mutant podocytes. Columns show functional category (molecular function or biological process), name of function, uncorrected P-value, FDR Benjamini and Hochberg corrected P value, Hit count in gene list, Hit count in genome, Genes with hit in gene list. [file 12882_2015_63_MOESM10_ESM.xls]

Gene Symbol	FC ([wild type] vs [mutant])	Gene ID	RPMK WT	RPKM mutant	Chromosome	Start	End	Description
Col2a1	805.2621	12824	10.715253	0.013657649	chr15	97806033	97835155	"collagen, type II, alpha 1"
Npbwr1	633.42236	226304	5.064747	0	chr1	5903788	5907479	neuropeptides B/W receptor 1
Krt19	482.11603	16669	10.365902	0	chr11	100002126	100007233	keratin 19
Clec3a	367.92764	403395	18.378107	0	chr8	116941986	116949746	"C-type lectin domain family 3, member a"
Calb1	305.15408	12307	3.1420815	0	chr4	15808411	15833856	calbindin 1
Mgat5b	286.45953	268510	8.742577	0.031324714	chr11	116780177	116848258	"mannoside acetylglucosaminyltransferase 5, isoenzyme B"
Krt15	262.34842	16665	4.502732	0	chr11	99993073	99997263	keratin 15
Upk3a	246.97925	22270	6.5922146	0	chr15	84847571	84852990	uroplakin 3A
Upk1b	226.51001	22268	3.7799451	0	chr16	38773297	38800316	uroplakin 1B
Chad	206.92245	12643	3.6953945	0	chr11	94426388	94430441	chondroadherin
Ly6d	165.20604	17068	7.057874	0	chr15	74592486	74593997	"lymphocyte antigen 6 complex, locus D"
Upk2	163.6328	22269	5.5269427	0	chr9	44260798	44262850	uroplakin 2
Psca	158.16974	72373	5.45476	0	chr15	74545269	74547495	prostate stem cell antigen
Adh1	139.7273	11522	3.577104	0.02627613	chr3	137940609	137953655	alcohol dehydrogenase 1 (class I)
Gimap3	110.58632	83408	5.2820373	0.049024276	chr6	48714463	48720850	"GTPase, IMAP family member 3"
Olfr1396	109.83909	258334	7.647582	0.071462505	chr11	48926279	48927259	olfactory receptor 1396
Rhcg	92.66087	56315	3.0282116	0.033542927	chr7	86738249	86762543	Rhesus blood group-associated C glycoprotein
Gm17546	81.40529	100502979	4.247886	0.053558853	chr15	95654889	95660503	"predicted gene, 17546"
Upk1a	50.783783	109637	5.336394	0.107853405	chr7	31388111	31397745	uroplakin 1A
Sprr1a	42.75371	20753	20.33038	0.48807082	chr3	92287876	92289803	small proline-rich protein 1A
Gm5741	41.14591	100503710	3.7032144	0	chr8	87591467	87591881	predicted gene 5741
Pdf	37.769733	68023	3.5266476	0.095836155	chr8	109568969	109572514	peptide deformylase (mitochondrial)
Wfdc2	31.169113	67701	5.893637	0.1940752	chr2	164388216	164394006	WAP four-disulfide core domain 2
Calca	30.418026	12310	7.674234	0.2589496	chr7	121774992	121779871	"calcitonin/calcitonin-related polypeptide, alpha"
S100g	26.416733	12309	23.422626	0.91005504	chrX	159399924	159402531	S100 calcium binding protein G
Krt18	25.33724	16668	3.9556465	0.16023935	chr15	101858647	101862457	keratin 18
Lypd6	24.410885	320343	3.6642423	0.15406778	chr2	49921982	50049084	LY6/PLAUR domain containing 6
Slc12a3	24.09012	20497	7.366255	0.31384766	chr8	96853108	96890121	"solute carrier family 12, member 3"
Ngb	24.028866	64242	12.097515	0.5167424	chr12	88438481	88443489	neuroglobin
Mal	22.443533	17153	4.966356	0.2271211	chr2	127458962	127482431	"myelin and lymphocyte protein, T cell differentiation protein"
Gchfr	19.302792	320415	6.288208	0.33436272	chr2	118993524	118998125	GTP cyclohydrolase I feedback regulator
1700029I15Rik	19.258593	75641	12.322926	0.6567502	chr2	92223075	92223760	RIKEN cDNA 1700029I15 gene
Hapln3	18.47362	67666	4.8428907	0.26906905	chr7	86261913	86275904	hyaluronan and proteoglycan link protein 3
Dusp23	18.27165	68440	3.9632967	0.22263317	chr1	174560900	174563105	dual specificity phosphatase 23
Bbox1	17.602444	170442	4.541819	0.2648305	chr2	110105240	110145882	"butyrobetaine (gamma), 2-oxoglutarate dioxygenase 1 (gamma-butyrobetaine hydroxylase)"
Sost	17.063448	74499	5.2406907	0.31523368	chr11	101823772	101828329	sclerostin
Rap1gap2	16.817371	380711	6.094409	0.37195	chr11	74196985	74424417	RAP1 GTPase activating protein 2
Gm19299	16.079851	100502636	5.740205	0.36640093	chr9	66981368	67011595	"predicted gene, 19299"
Klk1	14.776468	16612	79.49716	5.5219464	chr7	51480807	51484987	kallikrein 1
Tlr7	14.687611	170743	21.629898	1.5115218	chrX	163742863	163768469	toll-like receptor 7
Aplnr	14.37345	23796	3.7187188	0.26554817	chr2	84976517	84980080	apelin receptor
2900002K06Rik	14.258247	70226	3.501913	0.25208688	chrX	7722553	7725089	RIKEN cDNA 2900002K06 gene
P2ry1	13.814731	18441	5.929823	0.4405655	chr3	60806717	60812904	"purinergic receptor P2Y, G-protein coupled 1"
Creg2	13.698754	263764	3.1462898	0.23573753	chr1	39675251	39708027	cellular repressor of E1A-stimulated genes 2
1110017F19Rik	12.230201	68528	6.520033	0.5471763	chr11	115773331	115775231	RIKEN cDNA 1110017F19 gene
Krt80	12.071576	74127	3.0770597	0.2616272	chr15	101177875	101200556	keratin 80
Rtp3	12.0422735	235636	4.5641026	0.38900757	chr9	110887439	110892217	receptor transporter protein 3
Gm684	11.684023	100502940	3.7596045	0.3302637	chr9	51078363	51086659	predicted gene 684
Gm13199	11.585593	791411	4.2352414	0.375207	chr2	5783130	5783969	predicted gene 13199
Mir505	11.220041	751545	3.6802554	0	chrX	57647578	57647667	microRNA 505
Hsd11b2	10.817395	15484	8.307618	0.7882515	chr8	108042646	108047888	hydroxysteroid 11-beta dehydrogenase 2
Eif2s3y	10.783316	26908	23.287922	2.2166104	chrY	347055	365037	"eukaryotic translation initiation factor 2, subunit 3, structural gene Y-linked"
Xpnpep2	10.653948	170745	4.621102	0.44519055	chrX	45461902	45490158	"X-prolyl aminopeptidase (aminopeptidase P) 2, membrane-bound"
Adamts16	10.536133	271127	9.467567	0.92229146	chr13	70866686	70980688	"a disintegrin-like and metallopeptidase (reprolysin type) with thrombospondin type 1 motif, 16"
Fam132b	10.4035015	227358	6.064099	0.59827095	chr1	93263007	93270794	"family with sequence similarity 132, member B"
Scnn1g	10.187036	20278	3.9894068	0.40194947	chr7	128878021	128911991	"sodium channel, nonvoltage-gated 1 gamma"
Syngap1	10.0125475	240057	13.433383	1.377057	chr17	27095069	27095096	synaptic Ras GTPase activating protein 1 homolog (rat)
Uty	9.550004	22290	3.8663101	0.41553167	chrY	433587	582199	"ubiquitously transcribed tetratricopeptide repeat gene, Y chromosome"
Gm19412	9.376994	100502849	3.0528898	0.33416307	chr17	34056240	34057430	"predicted gene, 19412"
4931406H21Rik	8.949307	77592	4.694562	0.5384144	chr14	26406290	26410147	RIKEN cDNA 4931406H21 gene
Gdf5	8.943816	14563	4.354035	0.49966645	chr2	155766761	155771100	growth differentiation factor 5
Aqp2	8.817018	11827	3.1897438	0.37131733	chr15	99409487	99414976	aquaporin 2
Snora75	8.696633	100303740	3.6869042	0.43513274	chr1	88247745	88247860	"small nucleolar RNA, H/ACA box 75"
Trav7-6	8.431819	213480	4.0244575	0.48988834	chr14	54336438	54336964	T cell receptor alpha variable 7-6
Arntl	8.254429	11865	9.176185	1.1410009	chr7	120350979	120457636	aryl hydrocarbon receptor nuclear translocator-like
Sbk1	8.210013	104175	3.768575	0.47113383	chr7	133416133	133438513	SH3-binding kinase 1
2210417K05Rik	8.205536	70162	4.8315353	0.604351	chr10	61803004	61812599	RIKEN cDNA 2210417K05 gene
Dync1i1	8.073875	13426	6.286153	0.79912376	chr6	5675639	5978039	dynein cytoplasmic 1 intermediate chain 1
Enho	8.02283	69638	3.6619222	0.4684816	chr4	41585177	41587335	energy homeostasis associated
Cdk20	7.6342607	105278	4.198338	0.56444466	chr13	64533861	64541029	cyclin-dependent kinase 20
Mir30c-2	7.56545	723964	3.444924	0.46736476	chr1	23298540	23298623	microRNA 30c-2
Hyal1	7.551488	15586	4.395667	0.5974523	chr9	107479283	107484030	hyaluronoglucosaminidase 1
Npas2	7.544974	18143	12.025424	1.6358885	chr1	39251117	39420085	neuronal PAS domain protein 2
Slc39a11	7.5336356	69806	3.0186245	0.41125903	chr11	113106168	113511385	"solute carrier family 39 (metal ion transporter), member 11"
Mir680-2	7.4720473	751551	4.639628	0.6373156	chrX	140732333	140732442	microRNA 680-2
Acpp	7.376237	56318	161.92937	22.532103	chr9	104190570	104240052	"acid phosphatase, prostate"
Ephb1	7.350979	270190	19.448904	2.7155716	chr9	101824458	102257023	Eph receptor B1
Rdm1	7.291279	66599	10.667803	1.5016967	chr11	101489263	101497395	RAD52 motif 1
Pcdhgc5	7.196083	93708	4.4906178	0.6405026	chr18	37979200	38001526	"protocadherin gamma subfamily C, 5"
Accs	7.1105814	329470	4.4126616	0.6369515	chr2	93675610	93690014	1-aminocyclopropane-1-carboxylate synthase homolog (Arabidopsis)(non-functional)
Aqp3	7.069705	11828	3.5606444	0.5169378	chr4	41039757	41045216	aquaporin 3
4930538K18Rik	7.0002847	75180	3.2426805	0.47544426	chr4	118877660	118890822	RIKEN cDNA 4930538K18 gene
Pi16	6.7717834	74116	34.62525	5.248087	chr17	29455827	29466044	peptidase inhibitor 16
Gm6498	6.7529907	624367	4.211499	0.6401056	chr14	48818391	48848088	glyceraldehyde-3-phosphate dehydrogenase pseudogene
Aifm3	6.7235727	72168	11.287243	1.7230537	chr16	17489704	17507575	"apoptosis-inducing factor, mitochondrion-associated 3"
Nr4a3	6.687942	18124	3.7258973	0.5718069	chr4	48058103	48096224	"nuclear receptor subfamily 4, group A, member 3"
Cry1	6.5915346	12952	8.559514	1.3328264	chr10	84594445	84647799	cryptochrome 1 (photolyase-like)
Kdm5d	6.3704376	20592	10.31798	1.6624038	chrY	234231	293224	lysine (K)-specific demethylase 5D
Qpct	6.345997	70536	6.4206033	1.0384535	chr17	79451246	79489583	glutaminyl-peptide cyclotransferase (glutaminyl cyclase)
Gfod1	6.1549087	328232	7.952591	1.326166	chr13	43290888	43399541	glucose-fructose oxidoreductase domain containing 1
Fmo1	6.0331073	14261	8.796491	1.4965094	chr1	164759692	164796679	flavin containing monooxygenase 1
AU021092	6.02386	239691	12.8951235	2.1971593	chr16	5211912	5222392	expressed sequence AU021092
5031434O11Rik	5.8948298	100039684	6.5364394	1.1381016	chr3	51363679	51371038	RIKEN cDNA 5031434O11 gene
Eps8	5.7334595	13860	3.2770376	0.5866454	chr6	137425766	137597641	epidermal growth factor receptor pathway substrate 8
Sfrp1	5.6670046	20377	3.939757	0.7135544	chr8	24521974	24560104	secreted frizzled-related protein 1
Kcnj12	5.654327	16515	16.17003	2.935221	chr11	60836066	60884633	"potassium inwardly-rectifying channel, subfamily J, member 12"
Lonrf3	5.6167445	74365	4.3644347	0.7975437	chrX	33868404	33906851	LON peptidase N-terminal domain and ring finger 3
1600002K03Rik	5.5333347	69770	16.197433	3.0044882	chr10	79635689	79637864	RIKEN cDNA 1600002K03 gene
Batf	5.4844813	53314	3.936652	0.7367199	chr12	87027670	87050037	"basic leucine zipper transcription factor, ATF-like"
Pycr2	5.4542217	69051	4.65962	0.8768569	chr1	182834405	182838219	"pyrroline-5-carboxylate reductase family, member 2"
Pcdhga7	5.4403386	93715	4.2087975	0.79404116	chr18	37874488	38001526	"protocadherin gamma subfamily A, 7"
Rasgrp3	5.396446	240168	29.378094	5.58762	chr17	75835245	75928393	"RAS, guanyl releasing protein 3"
Top1mt	5.3098264	72960	216.31258	41.8131	chr15	75487463	75509220	"DNA topoisomerase 1, mitochondrial"
Shq1	5.1148567	72171	3.237902	0.6497424	chr6	100523076	100621151	SHQ1 homolog (S. cerevisiae)
Gm10847	5.0427866	100038618	3.9237142	0.7986156	chr14	75321922	75326411	predicted gene 10847
Car15	5.027445	80733	5.8453426	1.1933663	chr16	17835369	17838279	carbonic anhydrase 15
Pgam2	5.0244236	56012	10.276469	2.0992725	chr11	5701640	5703799	phosphoglycerate mutase 2
Gadd45g	4.9831767	23882	5.1999917	1.0710442	chr13	51942044	51943843	growth arrest and DNA-damage-inducible 45 gamma
Erg	4.9285073	13876	12.018467	2.5029073	chr16	95581811	95808200	avian erythroblastosis virus E-26 (v-ets) oncogene related
Gm8378	4.880201	666955	5.4420133	1.1445448	chr12	92921018	92924553	predicted gene 8378
Capn5	4.8649755	12337	6.6160574	1.395821	chr7	105270075	105326703	calpain 5
Ttc7	4.8635573	225049	15.468124	3.2643335	chr17	87682226	87781110	tetratricopeptide repeat domain 7
Car11	4.859897	12348	5.6199746	1.1869118	chr7	52955337	52960031	carbonic anhydrase 11
C1qtnf9	4.854811	239126	3.2236025	0.6815224	chr14	61386971	61399706	C1q and tumor necrosis factor related protein 9
A330009N23Rik	4.845483	380977	3.611221	0.76494116	chr15	101051627	101055581	RIKEN cDNA A330009N23 gene
Nme4	4.837167	56520	6.878103	1.459448	chr17	26228690	26232415	"non-metastatic cells 4, protein expressed in"
Sema6a	4.786412	20358	6.8296437	1.4645331	chr18	47404908	47528522	"sema domain, transmembrane domain (TM), and cytoplasmic domain, (semaphorin) 6A"
Il1f9	4.7786365	215257	8.521478	1.8302993	chr2	24041996	24049087	"interleukin 1 family, member 9"
2810433D01Rik	4.7595334	77132	31.309813	6.7519145	chr11	102480821	102485730	RIKEN cDNA 2810433D01 gene
Pqlc1	4.738156	66943	6.5764704	1.4246056	chr18	80450031	80489463	PQ loop repeat containing 1
6230427J02Rik	4.7210355	68176	3.4950697	0.7598532	chr9	107886555	107888247	RIKEN cDNA 6230427J02 gene
Zfp637	4.6913276	232337	7.1931505	1.5737453	chr6	117791260	117795974	zinc finger protein 637
Arhgef25	4.687216	52666	4.023648	0.88108146	chr10	126619577	126627110	Rho guanine nucleotide exchange factor (GEF) 25
Dll4	4.62403	54485	3.450401	0.76587886	chr2	119151520	119161402	delta-like 4 (Drosophila)
Fbln7	4.623393	70370	4.6874413	1.0406055	chr2	128689668	128722770	fibulin 7
Ptprb	4.593712	19263.chr10.2	44.934395	10.039826	chr10	115712579	115826594	"protein tyrosine phosphatase, receptor type, B"
Pmf1	4.5319157	67037	7.0395584	1.594317	chr3	88198065	88214238	polyamine-modulated factor 1
Tmem141	4.5243726	51875	4.3087845	0.9774791	chr2	25475586	25477525	transmembrane protein 141
Tspyl5	4.483228	239364	3.7045267	0.84811145	chr15	33613630	33617638	"testis-specific protein, Y-encoded-like 5"
Fmod	4.473953	14264	4.6494617	1.0666509	chr1	135934092	135944854	fibromodulin
Nol12	4.464074	97961	5.968102	1.3721952	chr15	78765363	78772340	nucleolar protein 12
2610021A01Rik	4.4252195	668572	5.857288	1.3585411	chr7	48854631	48881235	RIKEN cDNA 2610021A01 gene
Ddx3y	4.4093904	26900	11.772207	2.7402523	chrY	597158	623056	"DEAD (Asp-Glu-Ala-Asp) box polypeptide 3, Y-linked"
Palmd	4.3898134	114301	4.820734	1.1271411	chr3	116621180	116671870	palmdelphin
Adat2	4.3512573	66757	3.7371585	0.88153154	chr10	13272713	13283182	"adenosine deaminase, tRNA-specific 2, TAD2 homolog (S. cerevisiae)"
Det1	4.327536	76375	3.2824583	0.77851963	chr7	85972360	85992097	de-etiolated homolog 1 (Arabidopsis)
Clstn2	4.3209133	64085	3.2403347	0.7697071	chr9	97344814	97933586	calsyntenin 2
Cars2	4.314346	71941	5.0666914	1.2053702	chr8	11514017	11550771	cysteinyl-tRNA synthetase 2 (mitochondrial)(putative)
F8	4.282492	14069	4.335162	1.0390103	chrX	72418056	72625380	coagulation factor VIII
3110021A11Rik	4.233254	67289	3.8599	0.9358639	chr6	119798211	119799034	RIKEN cDNA 3110021A11 gene
Snord67	4.231695	100217458	5.9576616	1.4450157	chr2	91436238	91436335	"small nucleolar RNA, C/D box 67"
Nfil3	4.2100844	18030	3.5615103	0.86826944	chr13	53062578	53076408	"nuclear factor, interleukin 3, regulated"
Tdrd5	4.165853	214575	299.6616	73.83088	chr1	158185426	158233737	tudor domain containing 5
Spsb4	4.161411	211949	7.19511	1.7746304	chr9	96843901	96918774	splA/ryanodine receptor domain and SOCS box containing 4
5730494N06Rik	4.148186	70612	23.470428	5.8072934	chr2	132065228	132073524	RIKEN cDNA 5730494N06 gene
Ptn	4.13592	19242	132.80269	32.95685	chr6	36665663	36761361	pleiotrophin
2310047B19Rik	4.1118135	66962	9.876802	2.4654377	chr9	21760197	21762714	RIKEN cDNA 2310047B19 gene
Rhpn1	4.100983	14787	320.72427	80.27031	chr15	75534718	75544849	"rhophilin, Rho GTPase binding protein 1"
Clmn	4.0990887	94040	15.764893	3.9474323	chr12	106001324	106103286	calmin
Gstz1	4.09034	14874	19.694061	4.941819	chr12	88488115	88505673	glutathione transferase zeta 1 (maleylacetoacetate isomerase)
Tmem192	4.083474	73067	6.4459476	1.6201978	chr8	67471084	67492935	transmembrane protein 192
2210021J22Rik	4.0676355	72355	8.700242	2.1953323	chr15	85637402	85642127	RIKEN cDNA 2210021J22 gene
Igf2bp3	4.0538745	140488	5.197323	1.3158926	chr6	49035217	49164953	insulin-like growth factor 2 mRNA binding protein 3
Bmp6	4.0495114	12161	9.793177	2.4821725	chr13	38437585	38591597	bone morphogenetic protein 6
Arvcf	4.0480313	11877	189.0005	47.921494	chr16	18348367	18407167	armadillo repeat gene deleted in velo-cardio-facial syndrome
Bspry	4.032529	192120	4.668137	1.1881658	chr4	62141101	62158332	B-box and SPRY domain containing
Tubb2a	4.022339	22151	29.62083	7.5583954	chr13	34166147	34169877	"tubulin, beta 2A class IIA"
Hdhd3	4.018179	72748	7.268022	1.8565127	chr4	62160088	62163234	haloacid dehalogenase-like hydrolase domain containing 3
Trim62	4.013984	67525	3.5029333	0.8957094	chr4	128561384	128588570	tripartite motif-containing 62
Lrwd1	3.9880214	71735	3.727902	0.95944035	chr5	136598936	136611944	leucine-rich repeats and WD repeat domain containing 1
Snord37	3.957028	100217454	7.24132	1.8782773	chr10	80641706	80641758	"small nucleolar RNA, C/D box 37"
Tmem79	3.9516816	71913	4.863433	1.2632	chr3	88132575	88138355	transmembrane protein 79
Itgb8	3.9358156	320910	28.819454	7.5155725	chr12	120401276	120476749	integrin beta 8
Itpkb	3.9284985	320404	7.686298	2.0081754	chr1	182260607	182353790	"inositol 1,4,5-trisphosphate 3-kinase B"
Lime1	3.9212987	72699	10.094001	2.6420705	chr2	181114479	181118333	Lck interacting transmembrane adaptor 1
Kdr	3.907001	16542	42.22294	11.092154	chr5	76329299	76374453	kinase insert domain protein receptor
Vegfc	3.9004438	22341	4.0549254	1.0670378	chr8	55162886	55271808	vascular endothelial growth factor C
Mrpl41	3.8717473	107733	4.773203	1.2653599	chr2	24827990	24830618	mitochondrial ribosomal protein L41
Rpusd1	3.8705204	106707	3.2599444	0.8644739	chr17	25864696	25868401	RNA pseudouridylate synthase domain containing 1
Gadd45a	3.8570156	13197	194.47545	51.751682	chr6	66985090	66987401	growth arrest and DNA-damage-inducible 45 alpha
Aqp1	3.8294244	11826	3.0325685	0.8128083	chr6	55286293	55298549	aquaporin 1
Spsb3	3.826612	79043	3.3318326	0.89367557	chr17	25023619	25029092	splA/ryanodine receptor domain and SOCS box containing 3
R74862	3.793756	97423	3.1401162	0.849547	chr7	150207689	150239273	expressed sequence R74862
8430431K14Rik	3.767387	78103	6.8522944	1.8668389	chr19	31288033	31290886	RIKEN cDNA 8430431K14 gene
Dnajc17	3.7654226	69408	6.9616523	1.8976219	chr2	118998236	119034531	"DnaJ (Hsp40) homolog, subfamily C, member 17"
Abca9	3.7606578	217262	45.785023	12.495994	chr11	109962136	110029467	"ATP-binding cassette, sub-family A (ABC1), member 9"
3110040N11Rik	3.7425702	67290	9.533052	2.6144068	chr7	88927073	88934339	RIKEN cDNA 3110040N11 gene
Epha3	3.7334473	13837	4.4879947	1.2338247	chr16	63545044	63863983	Eph receptor A3
Gpank1	3.7228909	81845	4.411573	1.2162535	chr17	35258441	35261760	G patch domain and ankyrin repeats 1
Nsmce1	3.686289	67711	16.287922	4.535104	chr7	132611154	132635056	non-SMC element 1 homolog (S. cerevisiae)
Dmap1	3.656204	66233	17.505688	4.9142804	chr4	117347291	117354830	DNA methyltransferase 1-associated protein 1
Gm2366	3.6550937	100039673	7.4956536	2.1048543	chr8	46102570	46107739	predicted gene 2366
H2-Q2	3.6312218	15013	8.688641	2.4558976	chr17	35479278	35482667	"histocompatibility 2, Q region locus 2"
Syp	3.6276422	20977	4.098012	1.1594706	chrX	7215706	7230382	synaptophysin
Bckdhb	3.6208682	12040	4.4165435	1.2519324	chr9	83818759	84017847	"branched chain ketoacid dehydrogenase E1, beta polypeptide"
D630042F21Rik	3.6157281	330428	7.7739654	2.2067745	chr6	129462575	129469245	RIKEN cDNA D630042F21 gene
Pla2g6	3.6122594	53357	3.4230363	0.9726206	chr15	79116658	79158801	"phospholipase A2, group VI"
Snora21	3.6085732	100302498	7.90359	2.2480192	chr11	97642953	97643080	"small nucleolar RNA, H/ACA box 21"
Gm6642	3.6073127	625995	5.8774805	1.6723161	chr19	31004876	31005452	ubiquitin-like 5 pseudogene
Leng9	3.605813	243813	5.7869887	1.6472534	chr7	4099785	4101474	leukocyte receptor cluster (LRC) member 9
Prss48	3.6032207	368202	13.277947	3.7822576	chr3	85797732	85806413	"protease, serine, 48"
Egf	3.5920124	13645	56.085213	16.025871	chr3	129380493	129458240	epidermal growth factor
B3gntl1	3.5862129	210004	3.8240306	1.0944512	chr11	121477522	121534465	"UDP-GlcNAc:betaGal beta-1,3-N-acetylglucosaminyltransferase-like 1"
Rasip1	3.577198	69903	3.255376	0.934048	chr7	52882907	52894462	Ras interacting protein 1
6820426E19Rik	3.564368	100126203	5.395557	1.5536914	chr6	117445253	117450095	RIKEN cDNA 6820426E19 gene
Trp53i11	3.5506637	277414	22.745905	6.5751376	chr2	93027741	93041914	transformation related protein 53 inducible protein 11
Vcam1	3.5416143	22329	3.540327	1.0260137	chr3	115812938	115832606	vascular cell adhesion molecule 1
Angptl7	3.5415523	654812	38.055893	11.029081	chr4	147869389	147874571	angiopoietin-like 7
Gimap5	3.5312092	317757	6.576493	1.911534	chr6	48696196	48704199	"GTPase, IMAP family member 5"
Hspa5	3.5216365	14828	249.59451	72.74472	chr2	34627610	34632049	heat shock protein 5
Umod	3.515645	22242	20.643942	6.0269637	chr7	126606380	126622769	uromodulin
Dcaf4	3.5115967	73828	5.2492065	1.5342643	chr12	84861416	84882942	DDB1 and CUL4 associated factor 4
Leo1	3.5101948	235497	23.031565	6.734465	chr9	75289331	75314239	"Leo1, Paf1/RNA polymerase II complex component, homolog (S. cerevisiae)"
Aff3	3.5043154	16764	9.51516	2.786916	chr1	38234172	38721800	"AF4/FMR2 family, member 3"
Tek	3.500081	21687	26.73727	7.840612	chr4	94405991	94541630	endothelial-specific receptor tyrosine kinase
Ctsh	3.4958956	13036	43.49058	12.768733	chr9	89949105	89970933	cathepsin H
6430548M08Rik	3.486565	234797	3.2891378	0.96826726	chr8	122638052	122689207	RIKEN cDNA 6430548M08 gene
Glb1l2	3.480823	244757	5.425257	1.5997397	chr9	26570629	26614002	"galactosidase, beta 1-like 2"
B4galt4	3.471839	56375	3.3781002	0.9986743	chr16	38742377	38769158	"UDP-Gal:betaGlcNAc beta 1,4-galactosyltransferase, polypeptide 4"
Gm13889	3.471628	620695	5.9693427	1.764836	chr2	93795967	93797257	predicted gene 13889
Mllt11	3.4633853	56772	15.538552	4.604908	chr3	95022466	95032599	"myeloid/lymphoid or mixed-lineage leukemia (trithorax homolog, Drosophila); translocated to, 11"
Gja3	3.4590383	14611	32.29925	9.584029	chr14	57654497	57676782	"gap junction protein, alpha 3"
Rps6ka2	3.4484174	20112	3.6639218	1.0905293	chr17	7374464	7507664	"ribosomal protein S6 kinase, polypeptide 2"
Ebag9	3.446059	55960	46.87444	13.961248	chr15	44450859	44472572	estrogen receptor-binding fragment-associated gene 9
Snora3	3.4457157	100302499	11.963664	3.563656	chr7	116663646	116663765	"small nucleolar RNA, H/ACA box 3"
B3gnt3	3.4359584	72297	5.8702755	1.7535636	chr8	74215618	74227433	"UDP-GlcNAc:betaGal beta-1,3-N-acetylglucosaminyltransferase 3"
Cys1	3.4241986	12879	13.190488	3.9537838	chr12	25350703	25366660	cystin 1
Fam167b	3.4224946	230766	3.8655372	1.1592528	chr4	129254059	129255824	"family with sequence similarity 167, member B"
Psmg3	3.4216394	66506	3.3565686	1.0068675	chr5	140299548	140302797	"proteasome (prosome, macropain) assembly chaperone 3"
Sox7	3.407254	20680	4.5604157	1.3737605	chr14	64562543	64569569	SRY-box containing gene 7
Hey1	3.4057443	15213	4.694609	1.4148116	chr3	8663359	8667038	hairy/enhancer-of-split related with YRPW motif 1
Zfp511	3.395158	69752	8.111288	2.452115	chr7	147222290	147226504	zinc finger protein 511
Zfyve19	3.38986	72008	10.95054	3.3156207	chr2	119034456	119042786	"zinc finger, FYVE domain containing 19"
Flt1	3.389656	14254	19.82587	6.003265	chr5	148373772	148537564	FMS-like tyrosine kinase 1
Slc25a45	3.3873422	107375	3.8400965	1.1635742	chr19	5877826	5885768	"solute carrier family 25, member 45"
Col1a1	3.387255	12842	25.018454	7.580949	chr11	94797584	94813170	"collagen, type I, alpha 1"
Snord71	3.3828523	100217432	9.242284	2.8041887	chr8	112363212	112363275	"small nucleolar RNA, C/D box 71"
BC052040	3.3796606	399568	3.0794692	0.93521994	chr2	115407452	115604504	cDNA sequence BC052040
Raver2	3.3507807	242570	69.21579	21.201668	chr4	100741643	100824975	"ribonucleoprotein, PTB-binding 2"
Ifitm1	3.3488896	68713	76.22396	23.361557	chr7	148153328	148155726	interferon induced transmembrane protein 1
Bnip1	3.3471346	224630	4.3017654	1.3191206	chr17	26918024	26929466	BCL2/adenovirus E1B interacting protein 1
Adam19	3.3288975	11492	3.9453301	1.2164489	chr11	45869489	45960844	a disintegrin and metallopeptidase domain 19 (meltrin beta)
2810432D09Rik	3.312441	69961	12.134865	3.760086	chr4	41659065	41660549	RIKEN cDNA 2810432D09 gene
Sema4a	3.3051445	20351	6.6353917	2.0605693	chr3	88239884	88265104	"sema domain, immunoglobulin domain (Ig), transmembrane domain (TM) and short cytoplasmic domain, (semaphorin) 4A"
Snrnp40	3.3005638	66585	18.673752	5.8070364	chr4	130037379	130067278	small nuclear ribonucleoprotein 40 (U5)
Lrrc4	3.299975	192198	7.3119993	2.274242	chr6	28778126	28781747	leucine rich repeat containing 4
Med12l	3.293779	329650	6.052747	1.8861194	chr3	58809747	59122334	"mediator of RNA polymerase II transcription, subunit 12 homolog (yeast)-like"
Gm14378	3.2888641	100044509	3.7571914	1.1725423	chr8	4248214	4251423	predicted gene 14378
Ppie	3.2864137	56031	10.203724	3.1867478	chr4	122804368	122817184	peptidylprolyl isomerase E (cyclophilin E)
Gm19897	3.2832217	100503790	5.413543	1.6923594	chr7	29559918	29566533	"predicted gene, 19897"
Lctl	3.2653577	235435	38.66791	12.154329	chr9	63964954	63985925	lactase-like
Zfp523	3.2628646	224656	7.5766377	2.3833542	chr17	28314363	28342831	zinc finger protein 523
Sulf1	3.2608733	240725	84.368744	26.555752	chr1	12682511	12850453	sulfatase 1
Adcy4	3.2585979	104110	8.318443	2.620128	chr14	56387929	56402879	adenylate cyclase 4
Atad3a	3.2434921	108888	9.134616	2.890605	chr4	155114749	155135207	"ATPase family, AAA domain containing 3A"
Cyp4b1	3.2359707	13120	36.465733	11.566222	chr4	115297333	115320310	"cytochrome P450, family 4, subfamily b, polypeptide 1"
Zswim3	3.2213447	67538	3.5233562	1.1226139	chr2	164630614	164647627	"zinc finger, SWIM domain containing 3"
Htra1	3.2093127	56213	180.41245	57.698647	chr7	138079717	138129172	HtrA serine peptidase 1
Gm19395	3.207089	100502820	14.231602	4.5546365	chr10	53000087	53003492	"predicted gene, 19395"
Slc17a9	3.2031841	228993	4.6816845	1.5001388	chr2	180460044	180476983	"solute carrier family 17, member 9"
Zfpm1	3.1911871	22761	3.0898876	0.99380577	chr8	124806041	124861147	"zinc finger protein, multitype 1"
Rnpep	3.1880298	215615	4.287814	1.3804626	chr1	137159276	137180661	arginyl aminopeptidase (aminopeptidase B)
Ccdc157	3.1832075	216516	3.9386592	1.2699726	chr11	4041127	4060296	coiled-coil domain containing 157
1700048O20Rik	3.1761432	69430	3.4164593	1.1040463	chr9	121846393	121856134	RIKEN cDNA 1700048O20 gene
Mrpl2	3.172127	27398	11.109386	3.5945985	chr17	46783197	46787081	mitochondrial ribosomal protein L2
Hist2h3c2	3.1700392	97114	6.08699	1.9708291	chr3	96042039	96043050	"histone cluster 2, H3c2"
Acrbp	3.1674585	54137	3.35091	1.0858322	chr6	124998386	125013283	proacrosin binding protein
Ddah2	3.1617384	51793	31.084633	10.090924	chr17	35195980	35199044	dimethylarginine dimethylaminohydrolase 2
Gata2	3.1540782	14461	6.9313226	2.2555614	chr6	88143885	88157026	GATA binding protein 2
Cdh16	3.1439366	12556	4.4667115	1.458227	chr8	107138047	107148161	cadherin 16
Dysf	3.1365376	26903	7.4941273	2.4523454	chr6	83958584	84161036	dysferlin
Prkch	3.1202357	18755	8.557415	2.8149197	chr12	74686028	74879171	"protein kinase C, eta"
Rtel1	3.1200593	269400	3.8069198	1.2523392	chr2	181054429	181091321	regulator of telomere elongation helicase 1
Amt	3.1178398	434437	4.7284274	1.5565892	chr9	108199253	108203928	aminomethyltransferase
Gata5	3.096309	14464	8.921093	2.9572299	chr2	180059793	180069384	GATA binding protein 5
Fgd5	3.092631	232237	19.034698	6.3172617	chr6	91928872	92025999	"FYVE, RhoGEF and PH domain containing 5"
Ephb4	3.085788	13846	12.024936	3.9997015	chr5	137791337	137819897	Eph receptor B4
Pwp2	3.0821307	110816	4.2820334	1.4259695	chr10	77633655	77647894	PWP2 periodic tryptophan protein homolog (yeast)
Gm16279	3.0803883	100503379	5.446047	1.8146251	chr17	36033891	36049160	predicted gene 16279
Icam2	3.079115	15896	21.10661	7.0356407	chr11	106238970	106243955	intercellular adhesion molecule 2
Cald1	3.074051	109624.chr6.1	23.626694	7.8886557	chr6	34548544	34696015	caldesmon 1
Polr3g	3.0702837	67486	4.8658857	1.6266515	chr13	81812836	81850012	polymerase (RNA) III (DNA directed) polypeptide G
Trmt12	3.0619717	68260	3.6180787	1.2127964	chr15	58704204	58708336	tRNA methyltranferase 12 homolog (S. cerevisiae)
Hspa12b	3.060181	72630	4.744273	1.591232	chr2	130953148	130971719	heat shock protein 12B
2900053A13Rik	3.0556834	100503890	19.857948	6.670173	chr8	3621551	3624235	RIKEN cDNA 2900053A13 gene
Tmem101	3.0506365	76547	3.4837835	1.1721189	chr11	102013861	102017721	transmembrane protein 101
Sh3kbp1	3.048241	58194	4.2004223	1.4143425	chrX	156065340	156413849	SH3-domain kinase binding protein 1
Dock8	3.046303	76088	23.610443	7.9550343	chr19	25074019	25276922	dedicator of cytokinesis 8
Wdr86	3.0436633	269633	5.3601985	1.8075709	chr5	24218087	24236498	WD repeat domain 86
Slc3a2	3.0424333	17254	49.99413	16.865889	chr19	8781372	8797859	"solute carrier family 3 (activators of dibasic and neutral amino acid transport), member 2"
Jrk	3.0395396	16469	4.5786824	1.5461223	chr15	74534993	74539752	jerky
Gm5918	3.0394158	546143	4.292935	1.4496901	chr9	72827533	72833183	predicted gene 5918
S1pr1	3.0379395	13609	10.566741	3.57004	chr3	115413351	115417973	sphingosine-1-phosphate receptor 1
Ushbp1	3.0366185	234395	5.176044	1.7495192	chr8	73908173	73919700	Usher syndrome 1C binding protein 1
Srrd	3.0286949	70118	4.7909484	1.6235925	chr5	112766411	112772060	SRR1 domain containing
Pop7	3.0193865	74097	5.728651	1.9473531	chr5	137942667	137943657	"processing of precursor 7, ribonuclease P family, (S. cerevisiae)"
Ccdc56	3.01167	52469	14.519643	4.9483385	chr11	101139284	101140262	coiled-coil domain containing 56
Tusc5	3.008051	237858	3.649611	1.2452953	chr11	76493375	76512166	tumor suppressor candidate 5
Etl4	3.006401	208618	23.599691	8.056947	chr2	19831407	20732162	enhancer trap locus 4
Osgin2	3.0038087	209212	5.4443173	1.8602968	chr4	15924268	15941024	oxidative stress induced growth inhibitor family member 2
Ccdc163	2.9951797	68394	14.508828	4.9718785	chr4	116381176	116387709	coiled-coil domain containing 163
Ankrd6	2.978819	140577	5.623944	1.9377954	chr4	32891010	33037801	ankyrin repeat domain 6
Itgb5	2.9714556	16419	369.95377	127.78776	chr16	33829751	33949424	integrin beta 5
Dand5	2.9442105	23863	12.029892	4.193764	chr8	87339304	87356164	"DAN domain family, member 5"
BC029214	2.9408894	227622	54.403843	18.987246	chr2	25315008	25316614	cDNA sequence BC029214
Rps19-ps3	2.9401615	277692	10.35214	3.613849	chr4	147195886	147196311	"ribosomal protein S19, pseudogene 3"
Rrp12	2.9331777	107094	4.035617	1.4121556	chr19	41937341	41970643	ribosomal RNA processing 12 homolog (S. cerevisiae)
Shank3	2.922753	58234	7.9838705	2.8037052	chr15	89330288	89390691	SH3/ankyrin domain gene 3
Pde4b	2.9218743	18578	40.758472	14.317506	chr4	101760346	102279867	"phosphodiesterase 4B, cAMP specific"
Gm8615	2.9214485	667410	5.894461	2.07089	chr5	149965704	149967768	glucosamine-6-phosphate deaminase 1 pseudogene
Grcc10	2.921069	14790	6.864914	2.4121501	chr6	124689202	124691097	"gene rich cluster, C10 gene"
Zgpat	2.9197688	229007	4.1366334	1.4541515	chr2	181099636	181116099	"zinc finger, CCCH-type with G patch domain"
Smyd5	2.910166	232187	7.619969	2.6874883	chr6	85381970	85396423	SET and MYND domain containing 5
Grhl1	2.9088504	195733	3.9021494	1.3768723	chr12	25257152	25302256	grainyhead-like 1 (Drosophila)
Svep1	2.902132	64817	11.551202	4.0852714	chr4	58055668	58219468	"sushi, von Willebrand factor type A, EGF and pentraxin domain containing 1"
Thsd7a	2.8937473	330267	216.39488	76.75337	chr6	12261608	12699253	"thrombospondin, type I, domain containing 7A"
Tstd1	2.887332	226654	4.2162523	1.4987904	chr1	173349164	173350483	thiosulfate sulfurtransferase (rhodanese)-like domain containing 1
Lgals2	2.8867252	107753	5.232673	1.8604982	chr15	78681290	78685959	"lectin, galactose-binding, soluble 2"
Acn9	2.8833265	71238	6.7209644	2.3924828	chr6	6906018	6989220	ACN9 homolog (S. cerevisiae)
Ache	2.883117	11423	4.585353	1.632381	chr5	137728994	137735691	acetylcholinesterase
2610019E17Rik	2.880472	75614	11.583761	4.1275945	chr17	24665196	24665688	RIKEN cDNA 2610019E17 gene
Asb15	2.8703997	78910	46.497456	16.62638	chr6	24478144	24523164	ankyrin repeat and SOCS box-containing 15
Astn2	2.865306	56079	19.02391	6.814592	chr4	65041837	66065517	astrotactin 2
Mgll	2.8621142	23945	30.652308	10.992263	chr6	88674406	88778354	monoglyceride lipase
Mbd3	2.8616679	17192	16.34003	5.860637	chr10	79855286	79862224	methyl-CpG binding domain protein 3
Pet112l	2.8551989	229487	4.218094	1.51632	chr3	85378051	85458392	PET112-like (yeast)
A030001D20Rik	2.8542433	100126243	3.2333179	1.162702	chr7	52891050	52894128	RIKEN cDNA A030001D20 gene
AY512931	2.8424509	434310	4.3368797	1.5660135	chr8	46146056	46150772	cDNA sequence AY512931
Timm22	2.8424451	56322	6.21847	2.2454443	chr11	76220669	76229814	translocase of inner mitochondrial membrane 22 homolog (yeast)
Tec	2.8410597	21682	3.0393512	1.0980232	chr5	73146962	73259687	tec protein tyrosine kinase
Heg1	2.8379786	77446	44.44217	16.073002	chr16	33684552	33768281	HEG homolog 1 (zebrafish)
Trf	2.8359823	22041	3.395616	1.2289273	chr9	103106331	103132616	transferrin
Chd3	2.8357809	216848	26.725618	9.673108	chr11	69156775	69182928	chromodomain helicase DNA binding protein 3
Mrpl40	2.8355503	18100	7.2403255	2.6207867	chr16	18872111	18876730	mitochondrial ribosomal protein L40
Slc27a3	2.826358	26568	15.715574	5.7070813	chr3	90189155	90193849	"solute carrier family 27 (fatty acid transporter), member 3"
Dnajc4	2.8216603	57431	22.503012	8.185535	chr19	7062401	7066762	"DnaJ (Hsp40) homolog, subfamily C, member 4"
Fam50a	2.8184698	108160	23.707891	8.6335745	chrX	71558372	71565488	"family with sequence similarity 50, member A"
Vgll3	2.81307	73569	6.4545665	2.3550355	chr16	65815878	65863311	vestigial like 3 (Drosophila)
Gm9199	2.8065739	668489	3.0510595	1.1157972	chr14	73425410	73426697	glycine cleavage system protein H (aminomethyl carrier) pseudogene
1110038B12Rik	2.8062844	68763	8.7435465	3.1979153	chr17	35087181	35089416	RIKEN cDNA 1110038B12 gene
Pgm3	2.8031726	109785	6.273297	2.2969804	chr9	86446083	86465449	phosphoglucomutase 3
4930455F23Rik	2.802298	74895	8.0599575	2.9520886	chr1	166205729	166217978	RIKEN cDNA 4930455F23 gene
Mfng	2.792382	17305	3.951804	1.4525514	chr15	78586313	78603875	MFNG O-fucosylpeptide 3-beta-N-acetylglucosaminyltransferase
Tssc1	2.791426	380752	6.359881	2.3384814	chr12	29436693	29552356	tumor suppressing subtransferable candidate 1
Elmo1	2.7870517	140580	17.79131	6.5519996	chr13	20182465	20698394	"engulfment and cell motility 1, ced-12 homolog (C. elegans)"
Crlf2	2.7810383	57914	3.3035076	1.2192124	chr5	109983728	109988012	cytokine receptor-like factor 2
Npr1	2.7703347	18160	115.02991	42.61765	chr3	90254514	90269788	natriuretic peptide receptor 1
Mthfsd	2.769314	234814	6.2464695	2.3151193	chr8	123621457	123632279	methenyltetrahydrofolate synthetase domain containing
Llgl2	2.7688518	217325	6.0686684	2.2495968	chr11	115685372	115717094	lethal giant larvae homolog 2 (Drosophila)
Dnajc15	2.7688282	66148	6.2747393	2.3260055	chr14	78226024	78274724	"DnaJ (Hsp40) homolog, subfamily C, member 15"
Med24	2.7674155	23989	20.767382	7.7022643	chr11	98565905	98590749	mediator complex subunit 24
Klhl3	2.7603896	100503085	4.238219	1.5758834	chr13	58106318	58203789	kelch-like 3 (Drosophila)
Egfl7	2.7584186	353156	32.542458	12.108801	chr2	26436576	26448202	EGF-like domain 7
Sntb1	2.7533488	20649	8.495475	3.1669228	chr15	55470709	55738504	"syntrophin, basic 1"
Grasp	2.7439134	56149	3.006658	1.124669	chr15	101054638	101063187	GRP1 (general receptor for phosphoinositides 1)-associated scaffold protein
Atp6v1g2	2.7408543	66237	4.3761587	1.6387712	chr17	35370708	35375712	"ATPase, H+ transporting, lysosomal V1 subunit G2"
Zfp964	2.7385316	636741	3.7323673	1.398871	chr8	72178455	72188352	zinc finger protein 964
Cables1	2.7359514	63955	16.376879	6.1437535	chr18	11997783	12104136	CDK5 and Abl enzyme substrate 1
Tmem26	2.734147	327766	5.8036194	2.1786532	chr10	68186494	68245402	transmembrane protein 26
9530091C08Rik	2.7319465	320440	3.814545	1.4331174	chr9	68613153	68621129	RIKEN cDNA 9530091C08 gene
Armc5	2.730486	233912	7.9382257	2.9839702	chr7	135380871	135388614	armadillo repeat containing 5
D10Bwg1379e	2.7295277	215821	26.343937	9.906133	chr10	18307817	18463564	"DNA segment, Chr 10, Brigham & Women's Genetics 1379 expressed"
Nr3c2	2.7289612	110784	5.8107514	2.1854763	chr8	79426407	79767538	"nuclear receptor subfamily 3, group C, member 2"
2810039B14Rik	2.7182758	72665	60.067913	22.680885	chr15	75472559	75484071	RIKEN cDNA 2810039B14 gene
Dtnbp1	2.7159371	94245	15.465233	5.8445044	chr13	45017449	45097465	dystrobrevin binding protein 1
Gtf2f1	2.7133317	98053	44.298573	16.757063	chr17	57142825	57150711	"general transcription factor IIF, polypeptide 1"
Smarca4	2.7119546	20586	46.698196	17.673752	chr9	21420613	21508674	"SWI/SNF related, matrix associated, actin dependent regulator of chromatin, subfamily a, member 4"
Grk5	2.7098687	14773	30.37804	11.505951	chr19	60965652	61168458	G protein-coupled receptor kinase 5
Ntng2	2.7096572	171171	376.15857	142.48448	chr2	29050341	29103560	netrin G2
Kcng2	2.7049093	240444	10.907907	4.139042	chr18	80491283	80560993	"potassium voltage-gated channel, subfamily G, member 2"
Lsmd1	2.7023404	78304	27.871529	10.585999	chr11	69209293	69210173	LSM domain containing 1
Myo1d	2.695387	338367	382.0604	145.48613	chr11	80295629	80593527	myosin ID
Ppp1r16b	2.6915927	228852	3.4673138	1.3221931	chr2	158492366	158592070	"protein phosphatase 1, regulatory (inhibitor) subunit 16B"
Sepn1	2.6894798	74777	11.859587	4.525977	chr4	134093807	134108081	"selenoprotein N, 1"
Myg1	2.687674	60315	17.570404	6.709901	chr15	102162140	102168569	melanocyte proliferating gene 1
Mrps7	2.657403	50529	17.88338	6.9072204	chr11	115465465	115468938	mitchondrial ribosomal protein S7
Zfp423	2.6554925	94187	44.620056	17.246304	chr8	90185709	90483494	zinc finger protein 423
Asb6	2.6506784	72323	10.724059	4.1525345	chr2	30678618	30683820	ankyrin repeat and SOCS box-containing 6
Txnl4a	2.650102	27366	9.2558775	3.5848103	chr18	80403537	80422590	thioredoxin-like 4A
Acp6	2.6495466	66659	10.365091	4.0152493	chr3	96962700	96980499	"acid phosphatase 6, lysophosphatidic"
Aarsd1	2.6464326	69684	10.322041	4.003279	chr11	101268154	101278747	alanyl-tRNA synthetase domain containing 1
Alad	2.6451716	17025	52.840416	20.50328	chr4	62170204	62181097	"aminolevulinate, delta-, dehydratase"
Unc5b	2.6412857	107449	29.158278	11.330723	chr10	60225343	60294329	unc-5 homolog B (C. elegans)
Fkrp	2.639631	243853	14.345711	5.578146	chr7	17394616	17402081	fukutin related protein
Gm17435	2.635768	100503374	4.3395853	1.6898655	chr8	75016833	75029398	"predicted gene, 17435"
Josd2	2.634925	66124	9.157647	3.5671942	chr7	51723426	51727021	Josephin domain containing 2
Smarca2	2.6336963	67155	81.64641	31.818697	chr19	26679650	26852811	"SWI/SNF related, matrix associated, actin dependent regulator of chromatin, subfamily a, member 2"
G6pc3	2.6261947	68401	44.52089	17.399954	chr11	102051013	102055396	"glucose 6 phosphatase, catalytic, 3"
Ubxn6	2.623044	66530	23.054634	9.021188	chr17	56207677	56214412	UBX domain protein 6
Cdr2l	2.6132622	237988	8.852247	3.476815	chr11	115243230	115257446	cerebellar degeneration-related protein 2-like
Tgfbr2	2.6132069	21813	52.57839	20.651169	chr9	115996813	116084481	"transforming growth factor, beta receptor II"
Lemd2	2.6115336	224640	22.506329	8.845455	chr17	27326545	27341383	LEM domain containing 2
Rgl1	2.6070955	19731.chr1.1	72.67206	28.610235	chr1	154364660	154472241	"ral guanine nucleotide dissociation stimulator,-like 1"
Gpr126	2.6032104	215798	5.0777783	2.0020528	chr10	14122391	14264842	G protein-coupled receptor 126
Aatk	2.5999205	11302	3.1594462	1.2472742	chr11	119868632	119908459	apoptosis-associated tyrosine kinase
Ttc7b	2.5983486	104718	7.586766	2.9968874	chr12	101538980	101759032	tetratricopeptide repeat domain 7B
Kctd2	2.5978057	70382	31.950611	12.623611	chr11	115281440	115292588	potassium channel tetramerisation domain containing 2
Cby1	2.5940993	73739	8.908251	3.5246572	chr15	79489657	79498090	chibby homolog 1 (Drosophila)
Kptn	2.5938694	70394	3.6664557	1.4508059	chr7	16705225	16712865	kaptin
Rcan1	2.5911155	54720	36.26808	14.366433	chr16	92392198	92466391	regulator of calcineurin 1
Nmt1	2.589316	18107	22.166739	8.786736	chr11	102889876	102927419	N-myristoyltransferase 1
Rpl13	2.584736	270106	109.223404	43.37211	chr8	125626250	125629142	ribosomal protein L13
Slc25a30	2.5839112	67554	3.6701267	1.4578558	chr14	76161806	76186844	"solute carrier family 25, member 30"
Rangap1	2.5832381	19387	18.18822	7.226645	chr15	81534678	81560349	RAN GTPase activating protein 1
Oxct1	2.5832093	67041	81.61506	32.428127	chr15	3976428	4105344	3-oxoacid CoA transferase 1
Emcn	2.5780096	59308	53.51204	21.304832	chr3	137004042	137094033	endomucin
Pura	2.5779347	19290	36.512505	14.537205	chr18	36440816	36447898	purine rich element binding protein A
Pvrl4	2.5754256	71740	25.776556	10.27275	chr1	173300230	173318418	poliovirus receptor-related 4
Gpsm1	2.5738158	67839	3.8314834	1.5279195	chr2	26171053	26203757	"G-protein signalling modulator 1 (AGS3-like, C. elegans)"
1810034E14Rik	2.5712497	66503	4.7121825	1.8810005	chr13	64350008	64369453	RIKEN cDNA 1810034E14 gene
Pdzk1	2.567316	59020	3.8758702	1.5495335	chr3	96633988	96674849	PDZ domain containing 1
Arhgap12	2.565908	75415	28.449266	11.379966	chr18	6024448	6136096	Rho GTPase activating protein 12
Snx30	2.5658214	209131	5.627342	2.2510645	chr4	59818522	59917612	sorting nexin family member 30
Rassf7	2.5657773	66985	3.0567997	1.2228101	chr7	148401759	148404557	Ras association (RalGDS/AF-6) domain family (N-terminal) member 7
Mecr	2.5649846	26922	5.077633	2.031831	chr4	131399386	131423702	mitochondrial trans-2-enoyl-CoA reductase
3010026O09Rik	2.5644794	68067	12.675211	5.0730267	chr11	49988353	50013617	RIKEN cDNA 3010026O09 gene
8430406I07Rik	2.5644684	74528	5.377771	2.1523657	chr2	144096667	144106965	RIKEN cDNA 8430406I07 gene
Lyplal1	2.5478694	226791	4.5851407	1.847084	chr1	187911611	187941189	lysophospholipase-like 1
Robo4	2.5433538	74144	6.4956284	2.621353	chr9	37209631	37221607	roundabout homolog 4 (Drosophila)
Large	2.541038	16795	14.248375	5.7552633	chr8	75338498	75876455	like-glycosyltransferase
Surf2	2.5386338	20931	12.850295	5.195462	chr2	26771941	26775690	surfeit gene 2
Adam15	2.5346565	11490	7.3850217	2.9904985	chr3	89142934	89153932	a disintegrin and metallopeptidase domain 15 (metargidin)
Pdia5	2.5286176	72599	3.723449	1.5113788	chr16	35397398	35490959	protein disulfide isomerase associated 5
Comp	2.5277593	12845	6.487618	2.6342726	chr8	72897447	72905965	cartilage oligomeric matrix protein
Psmb5	2.523614	19173	71.93383	29.256437	chr14	55232957	55236832	"proteasome (prosome, macropain) subunit, beta type 5"
Utp14a	2.5224013	72554	6.3728886	2.593183	chrX	45610111	45635626	"UTP14, U3 small nucleolar ribonucleoprotein, homolog A (yeast)"
Id1	2.5221121	15901	5.3797784	2.1893294	chr2	152562010	152563146	inhibitor of DNA binding 1
Cdh5	2.522043	12562	47.3456	19.268074	chr8	106625525	106668402	cadherin 5
Enoph1	2.5192487	67870	11.601844	4.726798	chr5	100469013	100497784	enolase-phosphatase 1
Cacna2d2	2.5132904	56808	36.293457	14.821652	chr9	107302211	107431674	"calcium channel, voltage-dependent, alpha 2/delta subunit 2"
Nit1	2.5115376	27045	9.148916	3.7388766	chr1	173272368	173275776	nitrilase 1
Lmo2	2.5087965	16909	7.4404974	3.0440204	chr2	103798152	103822035	LIM domain only 2
Neurl3	2.507325	214854	3.981304	1.6297679	chr1	36321447	36330270	neuralized homolog 3 homolog (Drosophila)
Rorc	2.506107	19885	11.055559	4.527849	chr3	94176748	94202161	RAR-related orphan receptor gamma
Npr3	2.505572	18162	197.08603	80.73466	chr15	11769652	11837042	natriuretic peptide receptor 3
Metap1d	2.504423	66559	15.693397	6.4316196	chr2	71291395	71363248	methionyl aminopeptidase type 1D (mitochondrial)
Intu	2.5036266	380614	6.305218	2.5848863	chr3	40430208	40508662	inturned planar cell polarity effector homolog (Drosophila)
Nhsl2	2.5023112	100042480	3.1800764	1.3043894	chrX	99044724	99287394	NHS-like 2
A530017D24Rik	2.5014513	100504229	5.5892363	2.2933564	chr11	61678717	61681560	RIKEN cDNA A530017D24 gene
Sirpa	2.4959576	19261	132.37257	54.434216	chr2	129418575	129457964	signal-regulatory protein alpha
Wdr46	2.4927127	57315	15.442841	6.358666	chr17	34077668	34086640	WD repeat domain 46
Tmem104	2.4870229	320534	7.263233	2.9975135	chr11	115048801	115108339	transmembrane protein 104
E330020D12Rik	2.4820645	626058	16.585806	6.858586	chr1	155251316	155261363	Riken cDNA E330020D12 gene
Synpo	2.481159	104027	1164.9	481.88666	chr18	60753644	60789739	synaptopodin
Pex6	2.4793653	224824	11.123434	4.6047854	chr17	46848412	46862490	peroxisomal biogenesis factor 6
Nop2	2.4665997	110109	11.26526	4.687635	chr6	125081901	125094771	NOP2 nucleolar protein homolog (yeast)
Sil1	2.466282	81500	13.196175	5.4918213	chr18	35426050	35658579	endoplasmic reticulum chaperone SIL1 homolog (S. cerevisiae)
Card6	2.4628832	239319	4.6538305	1.9394451	chr15	5047439	5058533	"caspase recruitment domain family, member 6"
Pgcp	2.4617798	54381	38.092262	15.881763	chr15	33012884	33524307	plasma glutamate carboxypeptidase
Cntrob	2.461447	216846	4.1664677	1.7373546	chr11	69112998	69137375	"centrobin, centrosomal BRCA2 interacting protein"
Map4k2	2.460514	26412	10.28433	4.29004	chr19	6341250	6353527	mitogen-activated protein kinase kinase kinase kinase 2
Lpcat1	2.4573476	210992	12.852047	5.368054	chr13	73604831	73651986	lysophosphatidylcholine acyltransferase 1
Srfbp1	2.4570675	67222	9.468329	3.95519	chr18	52625347	52650392	serum response factor binding protein 1
Unk	2.4531019	217331	17.562086	7.3480406	chr11	115891636	115922508	unkempt homolog (Drosophila)
D2Wsu81e	2.4527378	227695	3.2763307	1.3710321	chr2	30028967	30033979	"DNA segment, Chr 2, Wayne State University 81, expressed"
Prickle1	2.4488974	106042	8.607291	3.6075048	chr15	93329545	93426322	prickle homolog 1 (Drosophila)
Timm10	2.4480784	30059	9.540496	3.9999688	chr2	84667178	84670370	translocase of inner mitochondrial membrane 10 homolog (yeast)
Gprin3	2.4454422	243385	18.270357	7.668325	chr6	59302455	59376284	GPRIN family member 3
Adsl	2.4399538	11564	7.957391	3.347342	chr15	80778949	80799803	adenylosuccinate lyase
Gm15880	2.4385726	100504375	4.116562	1.7326472	chr7	87780906	87788934	predicted gene 15880
Eef1d	2.4341478	66656	13.966901	5.889305	chr15	75725230	75739770	eukaryotic translation elongation factor 1 delta (guanine nucleotide exchange protein)
Creb3l1	2.4338083	26427	54.599876	23.025898	chr2	91822485	91864327	cAMP responsive element binding protein 3-like 1
Nudcd2	2.4284744	52653	3.2563646	1.3762916	chr11	40547144	40553549	NudC domain containing 2
Afap1l2	2.4228175	226250	6.1332364	2.5982459	chr19	56986844	57083065	actin filament associated protein 1-like 2
Thbd	2.4196084	21824	24.111923	10.228161	chr2	148230207	148233924	thrombomodulin
Bcs1l	2.4136882	66821	6.951374	2.9559734	chr1	74634935	74639017	BCS1-like (yeast)
Zfp384	2.4108434	269800	14.174145	6.034465	chr6	124959256	124987887	zinc finger protein 384
P4ha1	2.410515	18451	13.113895	5.583838	chr10	58786044	58836052	"procollagen-proline, 2-oxoglutarate 4-dioxygenase (proline 4-hydroxylase), alpha 1 polypeptide"
Kctd11	2.407787	216858	36.012745	15.351439	chr11	69691766	69694487	potassium channel tetramerisation domain containing 11
Cbfa2t3	2.4031472	12398	15.425812	6.5883813	chr8	125149036	125223009	"core-binding factor, runt domain, alpha subunit 2, translocated to, 3 (human)"
Pltp	2.3985264	18830	3.7425609	1.6015317	chr2	164665018	164683208	phospholipid transfer protein
Vps45	2.3983338	22365	6.299199	2.6957939	chr3	95803755	95862378	vacuolar protein sorting 45 (yeast)
Antxr2	2.3928356	71914	12.902383	5.534367	chr5	98313707	98459981	anthrax toxin receptor 2
Smarcb1	2.392124	20587	27.985971	12.007921	chr10	75359514	75384359	"SWI/SNF related, matrix associated, actin dependent regulator of chromatin, subfamily b, member 1"
F2rl2	2.3893142	14064	17.929049	7.701846	chr13	96466875	96472723	coagulation factor II (thrombin) receptor-like 2
Anapc13	2.3859382	69010	76.969154	33.110733	chr9	102528626	102536574	anaphase promoting complex subunit 13
Cntnap1	2.3856227	53321	5.4701734	2.3534782	chr11	101037431	101052034	contactin associated protein-like 1
Banp	2.3830504	53325	5.080575	2.1882184	chr8	124474433	124553158	BTG3 associated nuclear protein
Ccdc142	2.3813436	243510	5.207029	2.2442894	chr6	83051510	83059926	coiled-coil domain containing 142
Mmab	2.3812222	77697	6.183981	2.6655025	chr5	114881043	114894036	methylmalonic aciduria (cobalamin deficiency) type B homolog (human)
Gorasp1	2.3797715	74498	5.257648	2.2676036	chr9	119834791	119846676	golgi reassembly stacking protein 1
Mlec	2.3768363	109154	91.5363	39.52801	chr5	115592990	115608185	malectin
Ppp1r16a	2.3743181	73062	5.7250056	2.474846	chr15	76502110	76525345	"protein phosphatase 1, regulatory (inhibitor) subunit 16A"
Rrp7a	2.3742986	74778	19.978983	8.636721	chr15	82946277	82953231	ribosomal RNA processing 7 homolog A (S. cerevisiae)
Gramd1a	2.3738685	52857	7.5461545	3.2627225	chr7	31915146	31936069	GRAM domain containing 1A
Reep4	2.3736835	72549	6.849452	2.9617212	chr14	70945430	70948739	receptor accessory protein 4
Dhx29	2.3736427	218629	7.6618257	3.31305	chr13	113718001	113759395	DEAH (Asp-Glu-Ala-His) box polypeptide 29
Tmem14a	2.3709602	75712	3.236346	1.4010117	chr1	21208712	21220248	transmembrane protein 14A
Smarcd2	2.368198	83796	7.7076845	3.340542	chr11	106124485	106134286	"SWI/SNF related, matrix associated, actin dependent regulator of chromatin, subfamily d, member 2"
Ppp1r14b	2.3668082	18938	9.312529	4.0384593	chr19	7049538	7051814	"protein phosphatase 1, regulatory (inhibitor) subunit 14B"
Mob3c	2.3651395	100465	15.373106	6.671381	chr4	115500697	115508788	MOB kinase activator 3C
C77080	2.3636155	97130	5.4329796	2.359241	chr4	128896822	128938648	expressed sequence C77080
Ppm1f	2.362274	68606	8.576059	3.7262228	chr16	16896562	16927468	protein phosphatase 1F (PP2C domain containing)
Cfp	2.361376	18636	6.490666	2.821209	chrX	20502661	20508650	complement factor properdin
Pou6f1	2.354566	19009	5.338692	2.3272076	chr15	100405749	100430415	"POU domain, class 6, transcription factor 1"
Ints3	2.3532357	229543	31.571442	13.770194	chr3	90195310	90237558	integrator complex subunit 3
Ccdc46	2.3526556	76380	9.518447	4.1525865	chr11	108286580	108721929	coiled-coil domain containing 46
Dkk2	2.3516402	56811	50.2578	21.935303	chr3	131748256	131843268	dickkopf homolog 2 (Xenopus laevis)
Gpatch4	2.3486357	66614	5.335289	2.3315966	chr3	87847030	87859914	G patch domain containing 4
Fxyd1	2.3462229	56188	5.041659	2.2055416	chr7	31836697	31840675	FXYD domain-containing ion transport regulator 1
Gpx7	2.345221	67305	8.040887	3.5190954	chr4	108072822	108079318	glutathione peroxidase 7
Ctsd	2.3451421	13033	251.17908	109.93231	chr7	149561821	149573775	cathepsin D
Creg1	2.344463	433375	29.883432	13.0827265	chr1	167693911	167705435	cellular repressor of E1A-stimulated genes 1
Nop56	2.3435783	67134	16.75854	7.33952	chr2	130100148	130105049	NOP56 ribonucleoprotein homolog (yeast)
Ecscr	2.341775	68545	6.851954	3.0031734	chr18	35872743	35882005	endothelial cell-specific chemotaxis regulator
Csrp2	2.3410313	13008	49.13857	21.543995	chr10	110357232	110376570	cysteine and glycine-rich protein 2
B3gnt9-ps	2.3383465	97440	7.314175	3.2104633	chr8	107776538	107779051	"UDP-GlcNAc:betaGal beta-1,3-N-acetylglucosaminyltransferase 9, pseudogene"
Fam136a	2.3378062	66488	5.321271	2.336242	chr6	86315677	86320052	"family with sequence similarity 136, member A"
Hddc2	2.3354475	69692	4.7943892	2.107047	chr10	31033211	31047892	HD domain containing 2
Metrnl	2.3351226	210029	150.03882	65.94851	chr11	121563741	121578703	"meteorin, glial cell differentiation regulator-like"
Stx8	2.3347707	55943	3.9316077	1.7283711	chr11	67779985	68020650	syntaxin 8
AI846148	2.333156	68229	4.3610454	1.9184823	chr19	7430954	7457516	expressed sequence AI846148
Slc39a10	2.3311975	227059	10.123596	4.457248	chr1	46864389	46910354	"solute carrier family 39 (zinc transporter), member 10"
Gje1	2.328661	76743	126.63953	55.81797	chr10	14435432	14438020	"gap junction protein, epsilon 1"
Snhg12	2.3276637	100039864	7.125785	3.1421254	chr4	131864593	131866939	small nucleolar RNA host gene 12
Mcts2	2.3267245	66405	13.197435	5.821779	chr2	152512884	152513678	malignant T cell amplified sequence 2
Hyou1	2.323711	12282	113.02295	49.922436	chr9	44187573	44200452	hypoxia up-regulated 1
Fbxo4	2.321695	106052	14.216744	6.2850122	chr15	3913564	3929573	F-box protein 4
Apba3	2.3204584	57267	6.972994	3.0842986	chr10	80730917	80735992	"amyloid beta (A4) precursor protein-binding, family A, member 3"
Spats2l	2.3191228	67198	17.47863	7.735608	chr1	57831705	58005241	"spermatogenesis associated, serine-rich 2-like"
Tsr1	2.3191166	104662	5.74218	2.5413547	chr11	74711582	74722842	"TSR1, 20S rRNA accumulation, homolog (yeast)"
Rab3il1	2.3178139	74760	6.707241	2.970136	chr19	10076159	10112870	RAB3A interacting protein (rabin3)-like 1
Mrc2	2.3175244	17534	66.31478	29.36954	chr11	105153960	105212459	"mannose receptor, C type 2"
Rnf141	2.3170464	67150	17.809774	7.889231	chr7	117960049	117987895	ring finger protein 141
Nsun5	2.3137236	100609	9.302089	4.126485	chr5	135845823	135852667	"NOL1/NOP2/Sun domain family, member 5"
1700128F08Rik	2.3136342	76669	5.9082108	2.6210322	chr9	8221889	8241987	U1-snRNP binding protein homolog pseudogene
Tradd	2.3106308	71609	3.5529833	1.5782418	chr8	107782475	107788494	TNFRSF1A-associated via death domain
Mgat1	2.3101184	17308	17.49613	7.773538	chr11	49057693	49076526	mannoside acetylglucosaminyltransferase 1
Pgp	2.3098252	67078	9.515827	4.228424	chr17	24607418	24610045	phosphoglycolate phosphatase
Wdr5	2.306467	140858	7.8861027	3.5093458	chr2	27370667	27392055	WD repeat domain 5
Pnkp	2.3050213	59047	3.9890623	1.7762622	chr7	52112521	52118299	polynucleotide kinase 3'- phosphatase
Hsph1	2.305016	15505	18.913307	8.421797	chr5	150416862	150438890	heat shock 105kDa/110kDa protein 1
Tmed1	2.304719	17083	11.066024	4.928159	chr9	21311824	21314630	transmembrane emp24 domain containing 1
Sh2d3c	2.3044386	27387	8.072211	3.5953262	chr2	32576592	32610514	SH2 domain containing 3C
Ncam1	2.3035462	17967	15.788561	7.034877	chr9	49310251	49607174	neural cell adhesion molecule 1
2410022L05Rik	2.3023443	66423	8.419651	3.7534864	chr8	13884788	13890271	RIKEN cDNA 2410022L05 gene
Aagab	2.302211	66939	37.5638	16.746939	chr9	63450462	63489696	alpha- and gamma-adaptin binding protein
Zfp692	2.3018107	103836	11.69508	5.2148814	chr11	58120571	58128115	zinc finger protein 692
Abca2	2.3014274	11305	123.66352	55.151264	chr2	25284194	25304059	"ATP-binding cassette, sub-family A (ABC1), member 2"
H2-M3	2.3008196	14991	5.7622247	2.5705068	chr17	37407179	37411430	"histocompatibility 2, M region locus 3"
Snap47	2.2971594	67826	13.237716	5.9147043	chr11	59220652	59263458	"synaptosomal-associated protein, 47"
Atp5k	2.2951324	11958	41.300632	18.46971	chr5	108862272	108863397	"ATP synthase, H+ transporting, mitochondrial F1F0 complex, subunit e"
Sgip1	2.294252	73094	39.30333	17.583258	chr4	102431827	102643782	SH3-domain GRB2-like (endophilin) interacting protein 1
BC053749	2.2935452	333193	3.2659335	1.4615408	chr7	31324153	31337291	cDNA sequence BC053749
Gaa	2.2904682	14387	50.90103	22.809366	chr11	119129281	119147012	"glucosidase, alpha, acid"
Slc9a9	2.2889485	331004	4.6785817	2.0979216	chr9	94570311	95130871	"solute carrier family 9 (sodium/hydrogen exchanger), member 9"
Ppp1r13b	2.2877686	21981	16.308725	7.316764	chr12	113066669	113146266	"protein phosphatase 1, regulatory (inhibitor) subunit 13B"
Pigo	2.2872198	56703	5.891859	2.643963	chr4	43030510	43038671	"phosphatidylinositol glycan anchor biosynthesis, class O"
Sirt2	2.2855844	64383	85.010864	38.175804	chr7	29551771	29573684	"sirtuin 2 (silent mating type information regulation 2, homolog) 2 (S. cerevisiae)"
Gan	2.285441	209239	10.145985	4.5565424	chr8	119682035	119729086	giant axonal neuropathy
Ints1	2.2851658	68510	8.866701	3.9824963	chr5	140227236	140251632	integrator complex subunit 1
Dgcr14	2.2837493	27886	10.61985	4.7728868	chr16	17900802	17911441	DiGeorge syndrome critical region gene 14
Ctsz	2.2828107	64138	29.075207	13.07266	chr2	174252995	174264493	cathepsin Z
Hdac4	2.2797222	208727	10.198351	4.5915475	chr1	93829332	94076918	histone deacetylase 4
Hspa1a	2.2776752	193740	20.552805	9.26169	chr17	35106304	35109101	heat shock protein 1A
Stab1	2.2775486	192187	3.3094392	1.491413	chr14	31952203	31981827	stabilin 1
Gng11	2.2771263	66066	18.04632	8.134159	chr6	3953987	3958445	"guanine nucleotide binding protein (G protein), gamma 11"
Arhgap24	2.2743952	231532	200.11867	90.30933	chr5	102636217	103326956	Rho GTPase activating protein 24
Oplah	2.2725136	75475	11.91884	5.383175	chr15	76127033	76137675	5-oxoprolinase (ATP-hydrolysing)
1300018J18Rik	2.2710474	223776	6.4494977	2.9148133	chr15	88919537	88930770	RIKEN cDNA 1300018J18 gene
Mtap1a	2.2695308	17754	10.7347765	4.854761	chr2	121115338	121136568	microtubule-associated protein 1 A
Cxx1b	2.2691586	553127	3.207971	1.4510311	chrX	50972354	50973585	CAAX box 1 homolog B (human)
Hmox1	2.267842	15368	16.856098	7.628781	chr8	77617517	77624492	heme oxygenase (decycling) 1
C030030A07Rik	2.2657788	654818	3.3479087	1.5165868	chr6	136778452	136783971	RIKEN cDNA C030030A07 gene
Plekhh1	2.2654688	211945	3.2350593	1.4656659	chr12	80130150	80182642	"pleckstrin homology domain containing, family H (with MyTH4 domain) member 1"
Tinf2	2.265289	28113	6.6590395	3.017166	chr14	56297918	56300654	Terf1 (TRF1)-interacting nuclear factor 2
Irak4	2.261885	266632	9.356141	4.245583	chr15	94374091	94398747	interleukin-1 receptor-associated kinase 4
Snora31	2.2593033	100303751	14.549787	6.6098723	chr14	76247730	76247841	"small nucleolar RNA, H/ACA box 31"
Mrc1	2.2576978	17533	9.361986	4.2561135	chr2	14151041	14253650	"mannose receptor, C type 1"
2010107H07Rik	2.2544749	66487	15.377223	7.0007343	chr14	31937691	31942116	RIKEN cDNA 2010107H07 gene
Ntn4	2.2518535	57764	31.128347	14.188186	chr10	93103794	93208717	netrin 4
Clic3	2.2508876	69454	1406.7792	641.4803	chr2	25312363	25314292	chloride intracellular channel 3
Acbd4	2.249909	67131	13.806554	6.2984147	chr11	102963002	102973513	acyl-Coenzyme A binding domain containing 4
Ust	2.2493155	338362	4.991023	2.2774563	chr10	7924551	8238623	uronyl-2-sulfotransferase
Pcdh12	2.2486613	53601	29.164974	13.312159	chr18	38426746	38444056	protocadherin 12
Mdn1	2.247599	100019	7.7996736	3.5617948	chr4	32744094	32862192	midasin homolog (yeast)
Tmem199	2.2473345	195040	10.448868	4.772132	chr11	78320557	78325670	transmembrane protein 199
Slc8a1	2.2441502	20541	6.8773737	3.145443	chr17	81772445	82137717	"solute carrier family 8 (sodium/calcium exchanger), member 1"
Adcy9	2.2397115	11515	6.608366	3.0283995	chr16	4287545	4420498	adenylate cyclase 9
Csad	2.2389772	246277	8.047788	3.68925	chr15	102007429	102033594	cysteine sulfinic acid decarboxylase
Elk3	2.2382462	13713	15.460822	7.0898266	chr10	92710161	92773904	"ELK3, member of ETS oncogene family"
Cox11	2.2373476	69802	3.616414	1.6590353	chr11	90499498	90507291	"COX11 homolog, cytochrome c oxidase assembly protein (yeast)"
Pde4dip	2.2341974	83679	33.391636	15.340061	chr3	97493752	97692630	phosphodiesterase 4D interacting protein (myomegalin)
Utp3	2.2327726	65961	25.761816	11.842487	chr5	88983508	88985108	"UTP3, small subunit (SSU) processome component, homolog (S. cerevisiae)"
Cd300lg	2.2324274	52685	15.204156	6.9903045	chr11	101902825	101916931	CD300 antigen like family member G
Arv1	2.225619	68865	3.0090175	1.3876659	chr8	127246039	127258023	ARV1 homolog (yeast)
Pskh1	2.2239552	244631	18.989569	8.763953	chr8	108424374	108455702	protein serine kinase H1
Ncf2	2.2222784	17970	21.218222	9.799896	chr1	154654387	154684120	neutrophil cytosolic factor 2
0610009O20Rik	2.2202168	66839	13.395612	6.1926737	chr18	38409903	38422283	RIKEN cDNA 0610009O20 gene
Xab2	2.2202094	67439	30.79424	14.235963	chr8	3610090	3621296	XPA binding protein 2
Zfp862	2.2186513	58894	3.4577656	1.5996226	chr6	48454338	48484831	zinc finger protein 862
Ccrl2	2.2174008	54199	8.0218725	3.7131495	chr9	110957339	110960023	chemokine (C-C motif) receptor-like 2
Akap10	2.2173011	56697	5.9723883	2.7646139	chr11	61684809	61743728	A kinase (PRKA) anchor protein 10
Adam4	2.2171888	11498	3.2608218	1.5095081	chr12	82520536	82522865	a disintegrin and metallopeptidase domain 4
Rab3ip	2.2167778	216363	5.019683	2.324155	chr10	116342840	116387436	RAB3A interacting protein
Dock1	2.2154727	330662	12.611475	5.8426576	chr7	141862370	142365330	dedicator of cytokinesis 1
Gimap1	2.2102242	16205	20.462854	9.502566	chr6	48689046	48693794	"GTPase, IMAP family member 1"
Urod	2.2099364	22275	27.674744	12.85331	chr4	116662822	116666980	uroporphyrinogen decarboxylase
Pcp4l1	2.2076762	66425	13.796548	6.414254	chr1	173103395	173127166	Purkinje cell protein 4-like 1
Ier5	2.2075098	15939	5.556202	2.5833695	chr1	156943497	156946766	immediate early response 5
Tada3	2.2069495	101206	21.418346	9.961037	chr6	113316655	113327514	transcriptional adaptor 3
Cad	2.206808	69719	4.0251837	1.8721136	chr5	31357184	31380852	"carbamoyl-phosphate synthetase 2, aspartate transcarbamylase, and dihydroorotase"
Snx15	2.2023973	69024	3.3790386	1.5747391	chr19	6119404	6128215	sorting nexin 15
Dnajb2	2.2008278	56812	18.864164	8.797562	chr1	75232998	75242267	"DnaJ (Hsp40) homolog, subfamily B, member 2"
Rpa2	2.2002118	19891	4.332263	2.020977	chr4	132324275	132334661	replication protein A2
A830007P12Rik	2.1982732	227612	8.781956	4.100349	chr2	25048240	25052333	RIKEN cDNA A830007P12 gene
Rbks	2.1979804	71336	5.843984	2.7289543	chr5	31926812	31999983	ribokinase
Ddx39	2.1976948	68278	13.508074	6.308659	chr8	86239076	86247250	DEAD (Asp-Glu-Ala-Asp) box polypeptide 39
Rcor1	2.1962876	217864	13.645449	6.3769016	chr12	112278009	112351597	REST corepressor 1
Kcnj5	2.1946766	16521	8.147242	3.8102286	chr9	32122368	32151822	"potassium inwardly-rectifying channel, subfamily J, member 5"
Snx31	2.1945794	66696	45.754112	21.39882	chr15	36433817	36485327	sorting nexin 31
Zbtb38	2.190821	245007	25.240507	11.825026	chr9	96585842	96653250	zinc finger and BTB domain containing 38
Ttc17	2.1900392	74569	15.959123	7.4794264	chr2	94140923	94246846	tetratricopeptide repeat domain 17
Col15a1	2.1888769	12819	6.8577523	3.2156699	chr4	47220884	47326037	"collagen, type XV, alpha 1"
Psg23	2.1878152	56868	4.2861724	2.0108054	chr7	19191692	19201850	pregnancy-specific glycoprotein 23
Tbcc	2.1871414	72726	5.0255	2.358379	chr17	47027570	47029412	tubulin-specific chaperone C
0610037L13Rik	2.1868334	74098	35.491974	16.65811	chr4	107562468	107570407	RIKEN cDNA 0610037L13 gene
Bmyc	2.1844487	107771	13.403449	6.297755	chr2	25562399	25563239	brain expressed myelocytomatosis oncogene
Wdr74	2.18382	107071	28.158333	13.234306	chr19	8810329	8815114	WD repeat domain 74
Nod1	2.1797485	107607	40.39406	19.020517	chr6	54873936	54922606	nucleotide-binding oligomerization domain containing 1
Wdr12	2.1790864	57750	4.2881536	2.0197937	chr1	60133712	60155344	WD repeat domain 12
Rbck1	2.1746466	24105	15.438268	7.2865305	chr2	152142070	152158375	RanBP-type and C3HC4-type zinc finger containing 1
Gdi1	2.1742325	14567	178.89954	84.45283	chrX	71550351	71557206	guanosine diphosphate (GDP) dissociation inhibitor 1
Macf1	2.1726162	11426	102.379265	48.365986	chr4	123026876	123361603	microtubule-actin crosslinking factor 1
Dpp7	2.1700757	83768	3.0495107	1.4423358	chr2	25207810	25211852	dipeptidylpeptidase 7
Unc13b	2.1685758	22249	10.6142645	5.0237293	chr4	43071856	43277759	unc-13 homolog B (C. elegans)
Stard8	2.16813	236920	13.673013	6.4727654	chrX	96237920	96270067	START domain containing 8
Map1lc3a	2.164544	66734	38.990902	18.488756	chr2	155102180	155103809	microtubule-associated protein 1 light chain 3 alpha
Gm19522	2.163008	100503040	8.672256	4.115144	chr16	42884483	42912176	"predicted gene, 19522"
Eif3g	2.1613257	53356	49.48575	23.500177	chr9	20698793	20703034	"eukaryotic translation initiation factor 3, subunit G"
Habp4	2.1605215	56541	15.684146	7.4509807	chr13	64263174	64287845	hyaluronic acid binding protein 4
Exoc3l2	2.1602788	74463	17.852774	8.482166	chr7	20074954	20082109	exocyst complex component 3-like 2
Sned1	2.159201	208777	3.4760227	1.6523445	chr1	95132474	95193025	"sushi, nidogen and EGF-like domains 1"
Hsf1	2.1580694	15499	42.873177	20.390657	chr15	76307875	76331402	heat shock factor 1
Csf2ra	2.15506	12982	10.3841095	4.945624	chr19	61300305	61304321	"colony stimulating factor 2 receptor, alpha, low-affinity (granulocyte-macrophage)"
Gne	2.1546311	50798.chr4.1	9.130731	4.3495445	chr4	44046947	44097049	glucosamine (UDP-N-acetyl)-2-epimerase/N-acetylmannosamine kinase
Rbm10	2.1521401	236732	10.117455	4.82516	chrX	20194629	20228031	RNA binding motif protein 10
Arfgap2	2.1473567	77038	18.449583	8.818474	chr2	91105272	91117528	ADP-ribosylation factor GTPase activating protein 2
Stmn1-rs1	2.1458805	111186	5.9945035	2.8672044	chr9	115190210	115191188	"stathmin 1, related sequence 1"
Zfand2b	2.1440563	68818	9.826082	4.70387	chr1	75165220	75168200	"zinc finger, AN1 type domain 2B"
Fuz	2.143437	70300	7.950885	3.8072894	chr7	52151449	52155994	fuzzy homolog (Drosophila)
1300001I01Rik	2.140683	74148	21.818321	10.4611635	chr11	74462997	74484349	RIKEN cDNA 1300001I01 gene
Acaca	2.1376483	107476	6.0584784	2.9089627	chr11	83943174	84215153	acetyl-Coenzyme A carboxylase alpha
Tmem60	2.1327224	212090	24.689842	11.882156	chr5	20388271	20392688	transmembrane protein 60
1700011J10Rik	2.1319275	100503849	3.416946	1.6450412	chr2	72817489	72826658	RIKEN cDNA 1700011J10 gene
S1pr4	2.1299195	13611	5.8969607	2.8416872	chr10	80960490	80962882	sphingosine-1-phosphate receptor 4
Cyyr1	2.1270933	224405	11.701226	5.6461973	chr16	85452464	85550954	cysteine and tyrosine-rich protein 1
Ggta1	2.1244712	14594	3.8380814	1.8542756	chr2	35255699	35316945	"glycoprotein galactosyltransferase alpha 1, 3"
Cct3	2.123289	12462	16.601555	8.0251045	chr3	88101057	88125688	"chaperonin containing Tcp1, subunit 3 (gamma)"
C530005A16Rik	2.1213777	654318	5.52434	2.6728432	chr4	116262338	116270235	RIKEN cDNA C530005A16 gene
Mib2	2.119664	76580	15.823561	7.6621103	chr4	155028581	155043336	mindbomb homolog 2 (Drosophila)
Chchd1	2.119568	66121	5.9192357	2.8663502	chr14	21522249	21523647	coiled-coil-helix-coiled-coil-helix domain containing 1
Cisd1	2.1192331	52637	15.706367	7.6069064	chr10	70793242	70807597	CDGSH iron sulfur domain 1
Cdon	2.1139815	57810	50.539124	24.5379	chr9	35228709	35315237	cell adhesion molecule-related/down-regulated by oncogenes
Brwd3	2.1138585	382236	5.6710267	2.7535756	chrX	105937547	106029694	bromodomain and WD repeat domain containing 3
B9d2	2.1131208	232987	5.9164	2.8737187	chr7	26465799	26471577	B9 protein domain 2
Rpl17	2.112748	319195	95.05191	46.176865	chr18	75160131	75163035	ribosomal protein L17
B230208H17Rik	2.1122074	227624	12.170198	5.913874	chr2	25438538	25463966	RIKEN cDNA B230208H17 gene
Blvrb	2.11122	233016	11.797848	5.7356195	chr7	28232997	28251000	biliverdin reductase B (flavin reductase (NADPH))
Pcdh1	2.109891	75599	41.117775	20.002333	chr18	38349199	38369416	protocadherin 1
Prkd1	2.108044	18760	7.003284	3.409833	chr12	51442219	51750210	protein kinase D1
Rexo4	2.1077735	227656	13.935866	6.786113	chr2	26809083	26819906	"REX4, RNA exonuclease 4 homolog (S. cerevisiae)"
Eif2b1	2.1064517	209354	9.39424	4.5774255	chr5	125020223	125029066	"eukaryotic translation initiation factor 2B, subunit 1 (alpha)"
Cirh1a	2.1063166	21771	12.633263	6.1560607	chr8	109417540	109446994	"cirrhosis, autosomal recessive 1A (human)"
Magi2	2.104883	50791	142.75223	69.60909	chr5	18732864	20211867	"membrane associated guanylate kinase, WW and PDZ domain containing 2"
Ssrp1	2.104371	20833	37.432316	18.257248	chr2	84877358	84887268	structure specific recognition protein 1
Rpl7a	2.1040928	27176	103.0104	50.24897	chr2	26766327	26768831	ribosomal protein L7A
Zfp772	2.1039746	232855	7.517118	3.6670938	chr7	7154833	7162709	zinc finger protein 772
R3hdml	2.103795	100043899	79.42196	38.74791	chr2	163318054	163328348	R3H domain containing-like
Atg4d	2.1021812	235040	3.0955667	1.511406	chr9	21069743	21078812	autophagy-related 4D (yeast)
Znrf3	2.1018186	407821	21.266537	10.385149	chr11	5176332	5344850	zinc and ring finger 3
Ldb2	2.10037	16826	23.472246	11.470177	chr5	44863372	45190946	LIM domain binding 2
Dnase1	2.0977128	13419	3.2179985	1.5745298	chr16	4037101	4040024	deoxyribonuclease I
St6galnac2	2.0940857	20446	6.538772	3.2048867	chr11	116538019	116555974	"ST6 (alpha-N-acetyl-neuraminyl-2,3-beta-galactosyl-1,3)-N-acetylgalactosaminide alpha-2,6-sialyltransferase 2"
BC051226	2.0938075	407803	3.4295638	1.6811762	chr17	34045128	34046123	cDNA sequence BC051226
Nek1	2.0930283	18004	21.187103	10.38981	chr8	63472017	63609031	NIMA (never in mitosis gene a)-related expressed kinase 1
Tob1	2.091695	22057	243.50937	119.48911	chr11	94072768	94076806	transducer of ErbB-2.1
Spag7	2.0907161	216873	28.656155	14.068043	chr11	70477271	70482918	sperm associated antigen 7
Ltbp1	2.0891523	268977	7.894402	3.8784668	chr17	75404869	75791109	latent transforming growth factor beta binding protein 1
Cln8	2.0882907	26889	4.2695246	2.098454	chr8	14888536	14901719	"ceroid-lipofuscinosis, neuronal 8"
Ptprg	2.088201	19270	16.634052	8.175922	chr14	12386067	13074553	"protein tyrosine phosphatase, receptor type, G"
Nars2	2.0877345	244141	37.908497	18.636835	chr7	104100037	104213267	asparaginyl-tRNA synthetase 2 (mitochondrial)(putative)
Alox12	2.086508	11684	5.984213	2.94373	chr11	70054957	70068843	arachidonate 12-lipoxygenase
Alcam	2.0861316	11658	100.98762	49.686386	chr16	52249109	52453110	activated leukocyte cell adhesion molecule
Sema6c	2.0858805	20360	9.381559	4.6163282	chr3	94964416	94977238	"sema domain, transmembrane domain (TM), and cytoplasmic domain, (semaphorin) 6C"
Mtss1l	2.085107	244654	6.086316	2.9959698	chr8	113245384	113265300	metastasis suppressor 1-like
Nucb1	2.0844042	18220	62.884285	30.965023	chr7	52748044	52765778	nucleobindin 1
Klf12	2.0837471	16597	8.160346	4.019526	chr14	100269862	100683606	Kruppel-like factor 12
Trpt1	2.0837278	107328	6.452319	3.178235	chr19	7070621	7073775	tRNA phosphotransferase 1
Man1a	2.0830696	17155	8.1308565	4.006302	chr10	53625839	53795602	"mannosidase 1, alpha"
Rps25	2.0824323	75617	113.26373	55.825314	chr9	44215797	44218489	ribosomal protein S25
Idua	2.0821252	15932	10.493671	5.1728716	chr5	109098125	109113577	"iduronidase, alpha-L-"
Sgce	2.0816662	20392	4.44059	2.1894774	chr6	4624350	4697204	"sarcoglycan, epsilon"
Arhgef15	2.0787683	442801	14.471027	7.1450334	chr11	68756656	68770360	Rho guanine nucleotide exchange factor (GEF) 15
Slc16a10	2.0771322	72472	3.321771	1.6414084	chr10	39753341	39862060	"solute carrier family 16 (monocarboxylic acid transporters), member 10"
Gtpbp8	2.0764747	66067	3.4891498	1.7246622	chr16	44738992	44746476	GTP-binding protein 8 (putative)
Eml2	2.0760589	72205	42.75096	21.135727	chr7	19766519	19791831	echinoderm microtubule associated protein like 2
Ehd3	2.073801	57440	135.78467	67.20394	chr17	74154181	74181433	EH-domain containing 3
Dnajc21	2.0736585	78244	10.685487	5.288934	chr15	10376518	10400271	"DnaJ (Hsp40) homolog, subfamily C, member 21"
Hsp90b1	2.0734394	22027	410.07336	202.99309	chr10	86153586	86168189	"heat shock protein 90, beta (Grp94), member 1"
Rufy1	2.0716047	216724	13.406674	6.642402	chr11	50202805	50244613	RUN and FYVE domain containing 1
Zfp839	2.0701785	72805.chr12.1	9.395674	4.658341	chr12	112088489	112108208	zinc finger protein 839
Phlda1	2.0683196	21664	22.930355	11.379004	chr10	110943342	110945705	"pleckstrin homology-like domain, family A, member 1"
Amph	2.0680337	218038	4.5344625	2.2505014	chr13	19040240	19242784	amphiphysin
Ddt	2.0660763	13202	10.376463	5.1548266	chr10	75233978	75236119	D-dopachrome tautomerase
D17Wsu104e	2.0654871	28106	33.72115	16.756792	chr17	56315964	56323343	"DNA segment, Chr 17, Wayne State University 104, expressed"
Gm505	2.0653179	244666	7.6939754	3.8236222	chr8	127421786	127427713	predicted gene 505
Dom3z	2.0620234	112403	10.708528	5.330244	chr17	34973964	34976131	DOM-3 homolog Z (C. elegans)
Nenf	2.0617971	66208	25.932907	12.909709	chr1	193130676	193141997	neuron derived neurotrophic factor
Lman2l	2.061526	214895	9.989788	4.973687	chr1	36480031	36502084	"lectin, mannose-binding 2-like"
Gnptab	2.0595605	432486	10.535411	5.250345	chr10	87841877	87910074	"N-acetylglucosamine-1-phosphate transferase, alpha and beta subunits"
Ttll5	2.058477	320244	5.3778844	2.6814928	chr12	87165623	87402843	"tubulin tyrosine ligase-like family, member 5"
Ramp2	2.0583649	54409	10.101924	5.037242	chr11	101107648	101109564	receptor (calcitonin) activity modifying protein 2
Snx11	2.0573983	74479	6.6892443	3.337104	chr11	96628863	96638869	sorting nexin 11
Brpf1	2.054388	78783	12.479961	6.2350774	chr6	113257131	113274698	"bromodomain and PHD finger containing, 1"
A130022J15Rik	2.053656	101351	21.487312	10.739037	chr6	97060938	97098877	RIKEN cDNA A130022J15 gene
Rfxap	2.050692	170767	3.7880347	1.8959402	chr3	54607037	54611713	regulatory factor X-associated protein
Itga2	2.049864	16398	24.97854	12.506997	chr13	115626120	115722249	integrin alpha 2
Npdc1	2.0480478	18146	14.384424	7.2088084	chr2	25258603	25265014	"neural proliferation, differentiation and control gene 1"
Gm10136	2.0464609	672214	4.997142	2.5062778	chr19	29077853	29078365	ribosomal protein L26 pseudogene
Clec1a	2.046245	243653	5.5383635	2.7780173	chr6	129376702	129402018	"C-type lectin domain family 1, member a"
Ctla2a	2.0455081	13024	13.701711	6.87519	chr13	61035516	61037986	cytotoxic T lymphocyte-associated protein 2 alpha
6530402F18Rik	2.0452945	76220	32.018593	16.06784	chr2	29098758	29107560	RIKEN cDNA 6530402F18 gene
Tmem205	2.0447707	235043	8.60394	4.3188076	chr9	21725453	21731906	transmembrane protein 205
Fas	2.0446436	14102	4.5532985	2.2857015	chr19	34365149	34402260	Fas (TNF receptor superfamily member 6)
Rit1	2.0417268	19769	23.82554	11.9772215	chr3	88520776	88534970	Ras-like without CAAX 1
Rplp2	2.0414314	67186	43.601704	21.92198	chr7	148633549	148637241	"ribosomal protein, large P2"
Osbpl1a	2.040274	64291	3.36696	1.6937939	chr18	12913845	13100229	oxysterol binding protein-like 1A
Znhit2-ps	2.0398686	29805	3.5328813	1.7776155	chr19	6061207	6062468	"zinc finger, HIT domain containing 2, pseudogene"
Pdia6	2.0354984	71853	68.75191	34.667706	chr12	17273401	17291576	protein disulfide isomerase associated 6
Maml3	2.0323992	433586	41.05407	20.732817	chr3	51491535	51908928	mastermind like 3 (Drosophila)
Nt5dc2	2.0321515	70021	5.044392	2.5477912	chr14	31948039	31952310	5'-nucleotidase domain containing 2
Hoxa9	2.0260465	15405	14.835456	7.5155826	chr6	52174053	52177369	homeobox A9
Slc20a1	2.025689	20515	14.021296	7.1043854	chr2	129024509	129037348	"solute carrier family 20, member 1"
Sufu	2.0254626	24069	4.6233315	2.3428352	chr19	46471408	46561150	suppressor of fused homolog (Drosophila)
Ube3b	2.025425	117146	21.72688	11.010126	chr5	114830616	114871175	ubiquitin protein ligase E3B
Tpst2	2.0250542	22022	7.4839005	3.7931714	chr5	112705727	112744376	protein-tyrosine sulfotransferase 2
Nme6	2.0241294	54369	4.7545543	2.4109185	chr9	109735308	109745475	"non-metastatic cells 6, protein expressed in (nucleoside-diphosphate kinase)"
Ikbkb	2.0239007	16150	9.402438	4.7682843	chr8	23769677	23817055	inhibitor of kappaB kinase beta
Cutc	2.0230186	66388	3.6868362	1.8705311	chr19	43827513	43843128	cutC copper transporter homolog (E.coli)
Lyrm2	2.0218267	108755	21.885576	11.11028	chr4	32887234	32889229	LYR motif containing 2
Fcer1g	2.02181	14127	5.9947777	3.0432937	chr1	173159703	173164480	"Fc receptor, IgE, high affinity I, gamma polypeptide"
Abhd16a	2.0215394	193742	42.83763	21.749756	chr17	35226236	35239932	abhydrolase domain containing 16A
Dcdc2c	2.0205789	68511	48.313274	24.54154	chr12	29122660	29233202	doublecortin domain containing 2C
Twf2	2.019337	23999	4.6419954	2.3594294	chr9	106105439	106117718	"twinfilin, actin-binding protein, homolog 2 (Drosophila)"
Meis2	2.0188725	17536	16.549156	8.413524	chr2	115687000	115890794	Meis homeobox 2
Shroom4	2.0186644	208431	14.708226	7.478379	chrX	5977263	6210835	shroom family member 4
Ifngr1	2.0159879	15979	119.26302	60.719566	chr10	19311764	19330031	interferon gamma receptor 1
Apbb3	2.0156002	225372	12.503108	6.366854	chr18	36830813	36839020	"amyloid beta (A4) precursor protein-binding, family B, member 3"
Gpn1	2.0145493	74254	11.191148	5.701749	chr5	31797134	31814000	GPN-loop GTPase 1
Rps6ka5	2.013528	73086	3.2328138	1.6479125	chr12	101787988	101965193	"ribosomal protein S6 kinase, polypeptide 5"
Akap9	2.0133498	100986	21.943033	11.186354	chr5	3928054	4080204	A kinase (PRKA) anchor protein (yotiao) 9
Zscan20	2.0130103	269585	3.6290405	1.8503625	chr4	128260783	128287342	zinc finger and SCAN domains 20
Prrg2	2.0116935	65116	5.049709	2.5764136	chr7	52308977	52317792	proline-rich Gla (G-carboxyglutamic acid) polypeptide 2
Zfp462	2.0111296	242466	47.591843	24.288652	chr4	54960817	55096435	zinc finger protein 462
Gpatch3	2.0097635	242691	3.0833023	1.5746435	chr4	133130660	133140157	G patch domain containing 3
Nbas	2.0096307	71169	17.408379	8.891052	chr12	13275933	13590617	neuroblastoma amplified sequence
Itga3	2.0078022	16400	400.5861	204.77937	chr11	94905796	94938115	integrin alpha 3
Nrp1	2.0049415	18186	74.95318	38.370674	chr8	130882973	131029375	neuropilin 1
Atg13	2.004145	51897	28.483059	14.587083	chr2	91514782	91550733	ATG13 autophagy related 13 homolog (S. cerevisiae)
Eif2ak3	2.0040495	13666	7.867235	4.029255	chr6	70794521	70855234	eukaryotic translation initiation factor 2 alpha kinase 3
Pcsk7	2.0038536	18554	14.224962	7.286114	chr9	45714652	45737805	proprotein convertase subtilisin/kexin type 7
Psen2	2.0038204	19165	7.60772	3.8967886	chr1	182157135	182186431	presenilin 2
Arhgef3	2.0030127	71704	7.888977	4.0424805	chr14	27928085	28217090	Rho guanine nucleotide exchange factor (GEF) 3
Ndufb2	2.0029206	68198.chr6.2	16.819416	8.619027	chr6	39542582	39549470	"NADH dehydrogenase (ubiquinone) 1 beta subcomplex, 2"
Zcchc17	2.0023665	619605	11.530643	5.9104586	chr4	129993329	130037190	"zinc finger, CCHC domain containing 17"
Krt7	2.0021985	110310	43.994423	22.552858	chr15	101242834	101258237	keratin 7
Nlk	2.001882	18099	46.194695	23.68453	chr11	78380670	78510927	nemo like kinase
Dak	2.0008688	225913	40.78816	20.923126	chr19	10662281	10679922	dihydroxyacetone kinase 2 homolog (yeast)
Spg7	2.000012	234847	12.419848	6.3737426	chr8	125586888	125621651	spastic paraplegia 7 homolog (human)
