# Supplementary material for: Pathogenic pathways are activated in each major cell type of the glomerulus in the Cd2ap mutant mouse model of focal segmental glomerulosclerosis
Source: BMC Nephrol. 2015 May 13;16:71. doi: 10.1186/s12882-015-0063-z (PMC4430919; doi:10.1186/s12882-015-0063-z)
Supplement: Additional file 11: Table S11. — Microarray defined genes higher in wild type podocytes compared to Cd2ap mutant. Filtered for fold change > 1.5 and raw signal > 100. Columns show gene symbol, fold change, gene description, RNA seq validation fold change and transcript cluster ID. [file 12882_2015_63_MOESM11_ESM.xls]

Category	Name	p-value	q-value FDR B&H	Hit Count in Query List	Hit Count in Genome	Hit in Query List
GO: Molecular Function	structure-specific DNA binding	3.32E-05	3.43E-02	26	252	"SUB1,ADAR,PPARGC1A,DDX58,THRB,RAD18,TDG,MYC,STAT1,CEBPG,HMGB2,HMGB3,HMGN2,DDX60,SSBP4,KLF6,IFI16,HMGN3,JUND,JUNB,RPA3,MAF,RAD23B,ZBTB16,EGR1,PURB"
GO: Molecular Function	sulfur compound binding	5.86E-05	3.43E-02	22	202	"SLIT1,SLC6A6,COL5A3,ANG,FN1,ADAMTS8,GPNMB,LXN,HSD17B12,RSPO1,BMP4,CXCL13,GPX3,NELL2,CHST12,COL5A1,CYR61,CTGF,NDNF,GAL3ST4,DPYSL3,LAMC2"
GO: Biological Process	response to interferon-beta	1.03E-08	3.73E-05	10	22	"XAF1,TMEM173,IFITM3,GBP2,GBP3,STAT1,GBP6,IFIT3,IFI16,IRF1"
GO: Biological Process	response to virus	1.40E-08	3.73E-05	36	286	"ACTA2,ADAR,AP1S2,F2RL1,RSAD2,CXCL12,DDX58,TMEM173,MICB,DDIT4,IRF9,TNFAIP3,IFITM3,BNIP3,GBP3,PCBP2,TRIM5,POLR3F,STAT1,STAT2,HMGA1,IFIH1,CLU,BCL2L11,DDX60,GBP6,IFIT3,IFIT1,IFI16,IRF7,IRF1,NLRC5,CXCL10,PSMA2,ENO1,ISG15"
GO: Biological Process	response to biotic stimulus	2.07E-08	3.73E-05	65	713	"ACTA2,HNRNPA0,SOD2,TNFRSF14,ADAR,AP1S2,IRGM,F2RL1,RSAD2,ANXA3,APAF1,CXCL12,DDX58,WASL,TMEM173,MICB,LIAS,DDIT4,ATG10,AXL,TLR2,IRF9,TNFAIP3,BAK1,IFITM3,SERPINE1,BNIP3,GBP2,GBP3,PCBP2,TRIM5,GBP7,CXCL13,NFKBIA,POLR3F,STAT1,STAT2,CD47,HP,HMGA1,HMGB2,IFIH1,CLU,BCL2L11,DDX60,GBP6,IFIT3,IFIT1,IFI16,SP110,ICAM1,REN,CYP27B1,JUND,IRF7,IRF1,NLRC5,CXCL10,PTGFR,NR1D1,PSMA2,ENO1,IFITM5,ISG15,ANKRD1"
GO: Biological Process	defense response to virus	3.81E-08	4.21E-05	29	208	"ADAR,AP1S2,F2RL1,RSAD2,DDX58,TMEM173,MICB,DDIT4,IRF9,TNFAIP3,IFITM3,BNIP3,GBP3,PCBP2,TRIM5,POLR3F,STAT1,STAT2,IFIH1,DDX60,GBP6,IFIT3,IFIT1,IFI16,IRF7,IRF1,NLRC5,CXCL10,ISG15"
GO: Biological Process	response to external biotic stimulus	4.68E-08	4.21E-05	62	681	"ACTA2,HNRNPA0,SOD2,TNFRSF14,ADAR,AP1S2,IRGM,F2RL1,RSAD2,ANXA3,CXCL12,DDX58,WASL,TMEM173,MICB,LIAS,DDIT4,AXL,TLR2,IRF9,TNFAIP3,BAK1,IFITM3,SERPINE1,BNIP3,GBP2,GBP3,PCBP2,TRIM5,GBP7,CXCL13,NFKBIA,POLR3F,STAT1,STAT2,CD47,HP,HMGA1,HMGB2,IFIH1,CLU,BCL2L11,DDX60,GBP6,IFIT3,IFIT1,IFI16,SP110,ICAM1,REN,CYP27B1,JUND,IRF7,IRF1,NLRC5,CXCL10,PTGFR,NR1D1,PSMA2,ENO1,ISG15,ANKRD1"
GO: Biological Process	response to other organism	4.68E-08	4.21E-05	62	681	"ACTA2,HNRNPA0,SOD2,TNFRSF14,ADAR,AP1S2,IRGM,F2RL1,RSAD2,ANXA3,CXCL12,DDX58,WASL,TMEM173,MICB,LIAS,DDIT4,AXL,TLR2,IRF9,TNFAIP3,BAK1,IFITM3,SERPINE1,BNIP3,GBP2,GBP3,PCBP2,TRIM5,GBP7,CXCL13,NFKBIA,POLR3F,STAT1,STAT2,CD47,HP,HMGA1,HMGB2,IFIH1,CLU,BCL2L11,DDX60,GBP6,IFIT3,IFIT1,IFI16,SP110,ICAM1,REN,CYP27B1,JUND,IRF7,IRF1,NLRC5,CXCL10,PTGFR,NR1D1,PSMA2,ENO1,ISG15,ANKRD1"
GO: Biological Process	cellular response to interferon-beta	1.28E-07	9.88E-05	8	16	"TMEM173,GBP2,GBP3,STAT1,GBP6,IFIT3,IFI16,IRF1"
GO: Biological Process	response to cytokine	3.96E-07	2.68E-04	55	611	"ACSL4,PARP9,TNFRSF14,ADAR,PPARGC1A,IRGM,F2RL1,XAF1,CXCL12,CORO1A,MCM2,TMEM173,MCL1,FN1,RQCD1,AXL,IFI30,TIMP1,IRF9,IFITM3,GBP2,GBP3,CAMK2A,GBP7,HCLS1,CAV1,CXCL13,NKX3-1,STAT1,STAT2,CHI3L1,NUP43,CNTF,TNFRSF19,IL1RAP,GBP6,CXCR2,UBA7,KLF6,IFIT3,IFIT1,IFI16,CYBA,ICAM1,CYP27B1,JUNB,USP18,IRF7,IRF1,NLRC5,DPYSL3,ISG15,EGR1,KRAS,ANKRD1"
GO: Biological Process	cellular response to cytokine stimulus	6.20E-07	3.72E-04	48	510	"TNFRSF14,ADAR,PPARGC1A,F2RL1,XAF1,CXCL12,CORO1A,MCM2,TMEM173,FN1,RQCD1,AXL,IFI30,IRF9,IFITM3,GBP2,GBP3,CAMK2A,GBP7,HCLS1,CAV1,CXCL13,NKX3-1,STAT1,STAT2,CHI3L1,NUP43,CNTF,TNFRSF19,IL1RAP,GBP6,CXCR2,UBA7,KLF6,IFIT3,IFIT1,IFI16,CYBA,ICAM1,USP18,IRF7,IRF1,NLRC5,DPYSL3,ISG15,EGR1,KRAS,ANKRD1"
GO: Biological Process	type I interferon signaling pathway	9.16E-07	4.95E-04	15	76	"ADAR,XAF1,IRF9,IFITM3,GBP2,STAT1,STAT2,IFIT3,IFIT1,USP18,IRF7,IRF1,NLRC5,ISG15,EGR1"
GO: Biological Process	cellular response to type I interferon	1.09E-06	5.36E-04	15	77	"ADAR,XAF1,IRF9,IFITM3,GBP2,STAT1,STAT2,IFIT3,IFIT1,USP18,IRF7,IRF1,NLRC5,ISG15,EGR1"
GO: Biological Process	response to type I interferon	1.30E-06	5.58E-04	15	78	"ADAR,XAF1,IRF9,IFITM3,GBP2,STAT1,STAT2,IFIT3,IFIT1,USP18,IRF7,IRF1,NLRC5,ISG15,EGR1"
GO: Biological Process	response to decreased oxygen levels	1.34E-06	5.58E-04	30	259	"ACOT2,SOD2,PPARGC1A,SLC2A4,ANG,CXCL12,MMP14,DDIT4,ATP1B1,TGFB2,TGFB3,TLR2,ANGPTL4,NDRG1,CITED2,TCEB1,BMP2,BNIP3,CAV1,NKX3-1,STC2,CTGF,PLOD2,PLAU,ICAM1,KCNA5,EGLN3,EPAS1,EGR1,ANKRD1"
GO: Biological Process	type I interferon production	1.61E-06	6.21E-04	18	111	"DDX58,TMEM173,TLR2,IRF9,TNFAIP3,PCBP2,NFKBIA,NFKB2,POLR3F,TRIM21,IFIH1,GBP6,UBA7,IFI16,IRF7,IRF1,NLRC5,ISG15"
GO: Biological Process	defense response to other organism	1.82E-06	6.57E-04	38	377	"TNFRSF14,ADAR,AP1S2,IRGM,F2RL1,RSAD2,ANXA3,DDX58,TMEM173,MICB,DDIT4,TLR2,IRF9,TNFAIP3,IFITM3,SERPINE1,BNIP3,GBP2,GBP3,PCBP2,TRIM5,GBP7,CXCL13,POLR3F,STAT1,STAT2,HP,IFIH1,DDX60,GBP6,IFIT3,IFIT1,IFI16,IRF7,IRF1,NLRC5,CXCL10,ISG15"
GO: Biological Process	response to hypoxia	2.91E-06	9.82E-04	29	255	"ACOT2,SOD2,PPARGC1A,SLC2A4,ANG,CXCL12,MMP14,DDIT4,ATP1B1,TGFB2,TGFB3,TLR2,ANGPTL4,NDRG1,CITED2,TCEB1,BMP2,BNIP3,CAV1,NKX3-1,STC2,PLOD2,PLAU,ICAM1,KCNA5,EGLN3,EPAS1,EGR1,ANKRD1"
GO: Biological Process	response to oxygen levels	3.43E-06	1.09E-03	30	271	"ACOT2,SOD2,PPARGC1A,SLC2A4,ANG,CXCL12,MMP14,DDIT4,ATP1B1,TGFB2,TGFB3,TLR2,ANGPTL4,NDRG1,CITED2,TCEB1,BMP2,BNIP3,CAV1,NKX3-1,STC2,CTGF,PLOD2,PLAU,ICAM1,KCNA5,EGLN3,EPAS1,EGR1,ANKRD1"
GO: Biological Process	innate immune response	3.79E-06	1.14E-03	66	842	"PARP9,ADAR,IRGM,F2RL1,RSAD2,XAF1,DDX58,CORO1A,WASL,TMEM173,MICB,KITLG,AXL,IFI30,TLR2,IRF9,TNFAIP3,SPON2,IFITM3,C3,GBP2,GBP3,PCBP2,CAPZA2,CAMK2A,TRIM5,GBP7,TAP1,NFKBIA,NFKB2,POLR3F,TRIM21,STAT1,STAT2,CEBPG,MAPK8,IFIH1,CLU,PPP3R1,VAV2,DDX60,GBP6,ARPC5,UBA7,TYROBP,IFIT3,CTSS,IFIT1,IFI16,SP110,CYBA,RASGRP1,CTSK,ICAM1,CYP27B1,USP18,IRF7,IRF1,NLRC5,DUSP4,LIMK1,NR1D1,LGALS3,ISG15,EGR1,KRAS"
GO: Biological Process	regulation of type I interferon production	5.38E-06	1.53E-03	17	109	"DDX58,TMEM173,TLR2,TNFAIP3,PCBP2,NFKBIA,NFKB2,POLR3F,TRIM21,IFIH1,GBP6,UBA7,IFI16,IRF7,IRF1,NLRC5,ISG15"
GO: Biological Process	adhesion to symbiont	8.18E-06	2.21E-03	5	8	"GBP2,GBP3,GBP7,GBP6,ICAM1"
GO: Biological Process	response to mechanical stimulus	2.06E-05	5.29E-03	22	184	"CXCL12,ASNS,MMP14,CITED2,BAK1,BNIP3,MYC,CAV1,STAT1,CHI3L1,MAPK8,IGFBP2,CYBA,PKD2,TNC,JUND,JUNB,ITGB1,IRF1,CXCL10,EGR1,ANKRD1"
GO: Biological Process	immune effector process	2.36E-05	5.78E-03	50	616	"TNFRSF14,ADAR,AP1S2,CPLX2,F2RL1,RSAD2,ANXA3,DDX58,WASL,TMEM173,MICB,DDIT4,TGFB2,TGFB3,TLR2,IRF9,TNFAIP3,IFITM3,BNIP3,C3,GBP3,PCBP2,STXBP2,TRIM5,TAP1,POLR3F,STAT1,STAT2,CD47,CEBPG,IFIH1,CLU,VAV2,DDX60,GBP6,ARPC5,TYROBP,IFIT3,IFIT1,IFI16,RASGRP1,ICAM1,IRF7,IRF1,NLRC5,CXCL10,LIG4,LIMK1,LGALS1,ISG15"
GO: Biological Process	regulation of immune system process	2.57E-05	6.04E-03	81	1163	"PARP9,TNFRSF14,FIGF,BLOC1S3,AP1S2,JAG1,F2RL1,RSAD2,CXCL12,DDX58,CORO1A,WASL,TMEM173,MICB,KITLG,AXL,TGFB2,TGFB3,KLF10,ZNF580,TLR2,TNFAIP3,BMP4,SERPINE1,PAWR,C3,FSTL3,PCBP2,STXBP2,MYC,TRIM5,HCLS1,CAV1,TAP1,CXCL13,NFKBIA,NFKB2,POLR3F,STAT1,STAT2,CD47,RASSF2,TMEM176A,HMGB2,MAPK8,IFIH1,CLU,PPP3R1,VAV2,DDX60,GBP6,CXCR2,ARPC5,IGFBP2,MAP3K8,TYROBP,CTSS,IFIT1,IFI16,RASGRP1,CTSK,ICAM1,CD274,USP18,ITGB1,IRF7,IRF1,NLRC5,CXCL10,TMEM176B,BCAR1,DUSP4,TSC22D3,LIMK1,NR1D1,LGALS1,ISG15,ZBTB16,EGR3,KRAS,PURB"
GO: Biological Process	carboxylic acid metabolic process	3.17E-05	7.04E-03	69	953	"ACSL4,ACADS,SLC6A6,ACOT2,SOD2,ACY1,PPARGC1A,SMS,MTAP,ACSF2,ALDH1A3,PHGDH,FABP4,ALOX12B,ALOX5AP,MSMO1,PDP1,DDAH1,PADI4,PTPLA,ELOVL7,ASNS,L2HGDH,ALDH6A1,LIAS,GLS,OXSM,TLR2,HSD17B12,GLUL,SERINC5,PSAT1,C3,ADI1,MYO5A,GSTM5,CAV1,IDNK,GPX3,MTHFD1L,PARS2,CDO1,TARSL2,AZIN1,PTGR1,MPC1,CHST12,CPT1A,PDHA1,PDK4,CTPS1,IYD,IDH2,IDH1,CBR4,PRKAG2,SLC7A5,CYP4V2,FADS2,ACOT7,GSTO1,PSMB9,EGLN3,PSMD10,PSMA6,NR1D1,PSMA2,CCBL2,EHHADH"
GO: Biological Process	extracellular matrix organization	3.44E-05	7.04E-03	32	335	"ACTN1,COL5A3,COL26A1,FN1,MMP14,TGFB2,TGFB3,TIMP1,HSD17B12,BMP4,SERPINE1,BMP2,NFKB2,NID1,SPOCK2,VIT,COL12A1,COL6A1,COL5A1,COL8A1,CYR61,CTGF,PLOD2,CTSK,TNC,NDNF,ITGB1,COLGALT2,LOX,LOXL1,LGALS3,LAMC2"
GO: Biological Process	kidney development	3.47E-05	7.04E-03	25	232	"IQGAP1,ACTA2,ACVR2B,JAG1,WNK4,CITED2,APH1A,BMP4,SPRY1,FSTL3,MYC,PYGO1,NID1,NKX3-1,STAT1,HOXA11,HOXD11,BCL2L11,CXCR2,PKD2,REN,KLF15,PTCD2,ZBTB16,EGR1"
GO: Biological Process	skeletal muscle tissue development	3.54E-05	7.04E-03	21	177	"VAMP5,SRPK3,MAFF,USP2,CITED2,BTG1,BMP4,MYC,MYLPF,CAV1,SMYD1,HOXD9,HOXD10,NR1D2,IGFBP3,PLAGL1,FOXN2,TSC22D3,PSMA6,EGR1,ANKRD1"
GO: Biological Process	extracellular structure organization	3.65E-05	7.04E-03	32	336	"ACTN1,COL5A3,COL26A1,FN1,MMP14,TGFB2,TGFB3,TIMP1,HSD17B12,BMP4,SERPINE1,BMP2,NFKB2,NID1,SPOCK2,VIT,COL12A1,COL6A1,COL5A1,COL8A1,CYR61,CTGF,PLOD2,CTSK,TNC,NDNF,ITGB1,COLGALT2,LOX,LOXL1,LGALS3,LAMC2"
GO: Biological Process	immune response	4.20E-05	7.82E-03	91	1365	"PARP9,TNFSF10,TNFRSF14,CD164,ADAR,ENDOU,IRGM,CPLX2,F2RL1,RSAD2,ANXA3,XAF1,CXCL12,DDX58,CORO1A,WASL,TMEM173,MICB,KITLG,AXL,TGFB2,TGFB3,IFI30,TLR2,IRF9,TNFAIP3,SPON2,IFITM3,PAWR,C3,GBP2,GBP3,PCBP2,STXBP2,CAPZA2,CAMK2A,TRIM5,GBP7,MYLPF,TAP1,TAPBP,CXCL13,SP2,CD7,NFKBIA,NFKB2,POLR3F,TRIM21,CXCL1,STAT1,STAT2,CEBPG,MAPK8,IFIH1,CLU,PPP3R1,VAV2,DDX60,IL1RAP,GBP6,CXCR2,ARPC5,UBA7,TYROBP,IFIT3,CTSS,IFIT1,IFI16,SP110,CYBA,RASGRP1,CTSK,ICAM1,CD274,CYP27B1,USP18,ITGB1,IRF7,IRF1,NLRC5,CXCL10,BCAR1,DUSP4,LIG4,LIMK1,NR1D1,LGALS1,LGALS3,ISG15,EGR1,KRAS"
GO: Biological Process	regulation of cell proliferation	4.71E-05	8.48E-03	92	1388	"SOD2,GNL3,TNFRSF14,CD164,PPARGC1A,RASSF5,FIGF,TES,JAG1,ETV5,FABP4,FRK,ANG,RNF139,S100A6,CXCL12,CORO1A,INCA1,ADAMTS8,KITLG,GPNMB,TGFB2,TGFB3,TGFB1I1,KLF10,THRB,IFI30,TIMP1,ZNF580,TLR2,TNFAIP3,BAK1,CCND1,IFITM3,GLUL,RSPO1,GAS1,BTG1,BMP4,SERPINE1,BMP2,PAWR,FZD7,SPRY1,SPRY2,MYC,CNOT7,HILPDA,NDN,HCLS1,KLF11,CAV1,FANCL,MAB21L2,NFKBIA,CXCL1,NKX3-1,STAT1,CD47,HMGA1,HMGB2,CNTF,WFDC1,PTBP2,CLU,CXCR2,IGFBP3,IGFBP2,CYR61,CTGF,IFIT3,CYBA,PLAU,PKD2,TNC,CD274,CYP27B1,KCNA5,ITGB1,IRF1,RPA3,MCTS1,CXCL10,EGLN3,CNOT6,LIG4,NR1D1,ZBTB16,EGR1,EGR3,KRAS,TAX1BP3"
GO: Biological Process	defense response	4.92E-05	8.58E-03	96	1465	"PARP9,HNRNPA0,TNFRSF14,ADAR,AP1S2,IRGM,FABP4,F2RL1,ALOX5AP,RSAD2,ANXA3,XAF1,APAF1,DDX58,CORO1A,WASL,TMEM173,FN1,MICB,KITLG,LIAS,DDIT4,AXL,LXN,IFI30,ZNF580,TLR2,IRF9,TNFAIP3,SPON2,IFITM3,SERPINE1,BMP2,BNIP3,C3,GBP2,GBP3,PCBP2,CAPZA2,CAMK2A,TRIM5,GBP7,TAP1,TAPBP,CXCL13,NFKBIA,NFKB2,POLR3F,TRIM21,CXCL1,STAT1,STAT2,CD47,CHI3L1,CDO1,CEBPG,HP,MAPK8,IFIH1,NR1D2,CLU,PPP3R1,NFKBIZ,VAV2,DDX60,IL1RAP,GBP6,CXCR2,ARPC5,UBA7,TYROBP,IFIT3,CTSS,IFIT1,IFI16,SP110,CYBA,RASGRP1,CTSK,ICAM1,CYP27B1,PBK,USP18,ITGB1,IRF7,IRF1,NLRC5,CXCL10,DUSP4,LIMK1,PSMA6,NR1D1,LGALS3,ISG15,EGR1,KRAS"
GO: Biological Process	positive regulation of molecular function	5.32E-05	8.87E-03	87	1299	"ARFGAP3,IQGAP1,FDX1,TNFSF10,ACVR2B,PPARGC1A,SKP1,PLK2,APH1B,GPIHBP1,ANG,ANXA3,APAF1,DDX58,TMEM173,ARHGAP8,FN1,ASNS,KITLG,MMP14,RQCD1,KDELR3,TGFB2,TGFB3,TLR2,APH1A,BAK1,KLHDC3,CCND1,PARM1,SERINC5,RPS27L,BTG1,BMP4,BMP2,BOK,SPRY2,MYC,GADD45B,CAMK2A,TRIM5,CAV1,RGS5,CXCL13,NFKBIA,NFKB2,WIPI1,CXCL1,NKX3-1,STAT1,DUSP19,CHI3L1,PERP,RFK,MOAP1,CEBPG,AZIN1,HMGB2,MAPK8,CLU,VAV2,BCL2L11,IGFBP3,CYR61,MAP3K8,CTGF,IFI16,RASGRP1,PRKAG2,PKD2,MOB1B,ICAM1,RACGAP1,CYP27B1,HMGN3,GSTO1,PSMB9,EGLN3,PSMD10,CAB39,CNOT6,PSMA6,PSMA2,ENO1,LFNG,KRAS,TAX1BP3"
GO: Biological Process	homeostasis of number of cells	5.42E-05	8.87E-03	24	224	"CORO1A,KITLG,CCNB2,AXL,TGFB2,TIMP1,TNFAIP3,CITED2,BAK1,BMP4,HCLS1,HBA1,CD7,RASSF2,HOXB6,CEBPG,HMGB2,BCL2L11,PTBP3,CXCR2,FLVCR1,TSC22D3,EPAS1,ISG15"
GO: Biological Process	skeletal muscle organ development	6.79E-05	1.08E-02	21	185	"VAMP5,SRPK3,MAFF,USP2,CITED2,BTG1,BMP4,MYC,MYLPF,CAV1,SMYD1,HOXD9,HOXD10,NR1D2,IGFBP3,PLAGL1,FOXN2,TSC22D3,PSMA6,EGR1,ANKRD1"
GO: Biological Process	fat cell differentiation	8.11E-05	1.25E-02	19	160	"PEX11A,SOD2,PPARGC1A,JAG1,SLC2A4,FABP4,BSCL2,SELENBP1,ALDH6A1,TGFB1I1,CCND1,BMP2,BNIP3,DLK2,WNT5B,CREBL2,ARL4A,NR1D1,ZBTB16"
GO: Biological Process	brown fat cell differentiation	8.92E-05	1.34E-02	8	34	"PEX11A,PPARGC1A,SLC2A4,FABP4,SELENBP1,ALDH6A1,BNIP3,ARL4A"
GO: Biological Process	response to interferon-gamma	9.91E-05	1.38E-02	16	123	"PARP9,IRGM,IFI30,IRF9,IFITM3,GBP2,GBP3,CAMK2A,GBP7,STAT1,GBP6,ICAM1,CYP27B1,IRF7,IRF1,NLRC5"
GO: Biological Process	positive regulation of peptidase activity	9.92E-05	1.38E-02	18	149	"TNFSF10,APAF1,FN1,MMP14,BAK1,RPS27L,BOK,MYC,CAV1,NKX3-1,STAT1,PERP,MOAP1,BCL2L11,CYR61,CTGF,IFI16,EGLN3"
GO: Biological Process	myeloid cell homeostasis	1.00E-04	1.38E-02	17	136	"KITLG,AXL,TIMP1,CITED2,BAK1,BMP4,HCLS1,HBA1,HOXB6,CEBPG,HMGB2,BCL2L11,PTBP3,CXCR2,FLVCR1,EPAS1,ISG15"
GO: Biological Process	positive regulation of cell migration	1.04E-04	1.38E-02	28	293	"CCBE1,TNFRSF14,FIGF,F2RL1,ANXA3,CXCL12,CORO1A,FN1,MMP14,TGFB2,ZNF580,TLR2,SUN2,BMP4,SERPINE1,BMP2,P2RY6,CXCL13,MAPK8,WNT5B,CXCR2,CYR61,PLAU,AMOT,ICAM1,ITGB1,CXCL10,BCAR1"
GO: Biological Process	protein homooligomerization	1.05E-04	1.38E-02	26	263	"ACADS,SOD2,ALOX5AP,APAF1,P2RX6,GLS,DCXR,ANGPTL4,GLUL,KCTD9,CAV1,GPX3,NELL2,EVL,CLU,CPT1A,BCL2L11,CBR4,CRYZ,DCTPP1,KCNF1,KCNA5,CUBN,KCNRG,DPYSL3,STOM"
GO: Biological Process	vasculature development	1.29E-04	1.66E-02	46	590	"CCBE1,ACTA2,ACVR2B,FIGF,SGCB,JAG1,ANG,ANXA3,CXCL12,DDAH1,FN1,MMP14,TGFB2,ANGPTL4,TNFAIP3,CITED2,BAK1,BTG1,BMP4,SERPINE1,FZD7,C3,CAV1,CXCL13,NKX3-1,STAT1,CHI3L1,PPP3R1,VAV2,CXCR2,COL5A1,COL8A1,CYR61,CTGF,PLAU,PKD2,AMOT,JUNB,ITGB1,FLVCR1,CXCL10,SLC4A7,LOX,EPAS1,EGR1,EGR3"
GO: Biological Process	positive regulation of cell motility	1.38E-04	1.74E-02	28	298	"CCBE1,TNFRSF14,FIGF,F2RL1,ANXA3,CXCL12,CORO1A,FN1,MMP14,TGFB2,ZNF580,TLR2,SUN2,BMP4,SERPINE1,BMP2,P2RY6,CXCL13,MAPK8,WNT5B,CXCR2,CYR61,PLAU,AMOT,ICAM1,ITGB1,CXCL10,BCAR1"
GO: Biological Process	small molecule biosynthetic process	1.58E-04	1.94E-02	39	477	"MTAP,ALDH1A3,PHGDH,ALOX12B,ALOX5AP,MSMO1,PADI4,PTPLA,ELOVL7,ASNS,SGMS2,LIAS,GLS,OXSM,HSD17B12,CEPT1,GLUL,BMP2,PSAT1,ADI1,MYO5A,MTHFD1L,MMACHC,CHKA,ISYNA1,RFK,CDO1,PTGR1,CYB5R2,CHST12,PDK4,IDI1,CBR4,PRKAG2,CYP27B1,FADS2,GSTO1,NR1D1,LBR"
GO: Biological Process	response to oxygen-containing compound	1.85E-04	2.22E-02	83	1271	"HNRNPA0,TNFSF10,PDGFD,SOD2,ACVR2B,PPARGC1A,JAG1,SLC2A4,GPIHBP1,CXCL12,MICB,ASNS,LIAS,RAB31,AXL,TGFB2,TGFB3,KLF10,TIMP1,ATP6V1B2,ZNF580,TLR2,TNFAIP3,BAK1,CCND1,GLUL,BMP4,SERPINE1,BNIP3,FZD7,GBP2,MYO5A,TRIM5,RRAGD,HBB,KLF11,CAV1,GPR39,GPX3,NFKBIA,NKX3-1,STAT1,STC2,CDO1,HP,HMGB2,MAPK8,WFDC1,TBC1D4,CISH,AP3S1,CPT1A,WNT5B,GBP6,PDK4,COL6A1,IGFBP2,CTGF,CYBA,PRKAG2,PKD2,TNC,ICAM1,REN,CYP27B1,HMGN3,JUND,JUNB,RHOQ,ITGB1,IRF1,KLF15,CXCL10,PTGFR,CAB39,BCAR1,CAB39L,NR1D1,LGALS1,EGR1,EGR3,KRAS,ANKRD1"
GO: Biological Process	lipid biosynthetic process	1.96E-04	2.25E-02	46	601	"ACSL4,MTMR1,FDX1,MTM1,ALDH1A3,ALOX12B,ALOX5AP,ANG,MSMO1,PTPLA,ELOVL7,SGMS2,LIAS,OXSM,CERCAM,HSD17B12,CEPT1,SERINC5,BMP2,C3,SPTSSA,MYO5A,SRD5A1,PPAP2C,CHKA,ISYNA1,PTGR1,CYB5R2,CREBL2,PDK4,CYR61,IDI1,CBR4,PRKAG2,ST8SIA2,VAPA,MBOAT2,SH3YL1,A4GALT,CYP27B1,FADS2,COLGALT2,NR1D1,PIGM,LDLR,LBR"
GO: Biological Process	muscle structure development	2.00E-04	2.25E-02	43	550	"CD164,FHL3,SGCB,JAG1,VAMP5,SRPK3,PTPLA,MAFF,USP2,CITED2,BTG1,BMP4,BMP2,MYC,MYOZ1,TAGLN,MYLPF,CAV1,MYEF2,NKD1,ITGA11,SMYD1,HOXD9,HOXD10,CFL2,CNTF,NR1D2,IFRD1,IGFBP3,PLAGL1,FOXN2,ITGB1,PTCD2,CXCL10,BHLHE41,TSC22D3,PSMA6,EPAS1,LGALS1,EGR1,EGR3,KRAS,ANKRD1"
GO: Biological Process	organic acid metabolic process	2.01E-04	2.25E-02	73	1087	"ACSL4,ACADS,SLC6A6,ACOT2,SOD2,ACY1,PPARGC1A,SMS,MTAP,ACSF2,ALDH1A3,PHGDH,FABP4,ALOX12B,ALOX5AP,MSMO1,PDP1,DDAH1,PADI4,PTPLA,ELOVL7,ASNS,L2HGDH,ALDH6A1,LIAS,GLS,OXSM,TLR2,HSD17B12,GLUL,SERINC5,PSAT1,C3,ADI1,MYO5A,GSTM5,CAV1,IDNK,GPX3,MTHFD1L,PARS2,CDO1,TARSL2,SPOCK2,AZIN1,PTGR1,CSGALNACT2,MPC1,CHST12,CPT1A,PDHA1,PDK4,CTPS1,IYD,IDH2,IDH1,CBR4,PRKAG2,NDNF,SLC7A5,CYP4V2,FADS2,ABCG2,ACOT7,GSTO1,PSMB9,EGLN3,PSMD10,PSMA6,NR1D1,PSMA2,CCBL2,EHHADH"
GO: Biological Process	cellular response to stress	2.04E-04	2.25E-02	90	1408	"POLN,PARP9,PPP4R2,MORF4L1,SOD2,PPARGC1A,SLC2A4,ETV5,NEK6,F2RL1,FAM129A,PHLDA3,CXCL12,INO80E,MCL1,ASNS,DTX3L,KDELR3,DDIT4,ATG10,AXL,TGFB2,ZNF580,ANGPTL4,RAD18,CDC42EP5,NDRG1,TNFAIP3,CITED2,BAK1,KLHDC3,CCND1,RPS27L,TCEB1,BMP2,BNIP3,BOK,SLC52A3,SLC25A24,FZD7,TDG,MYC,GADD45B,GTF2H2,HBB,C12orf5,CAV1,FANCL,GPX3,NFKBIA,CCNH,WIPI1,C1orf86,NKX3-1,DUSP19,STC2,CEBPG,HP,HMGA1,HMGB2,MAPK8,CNTF,TNFRSF19,CLU,BCL2L11,ALKBH2,PDK4,CTGF,IFI16,PKD2,TNC,ATG4C,ICAM1,PBK,FAM175A,IRF7,RPA3,MCTS1,CXCL10,PSMB9,EGLN3,PSMD10,DUSP4,LIG4,PSMA6,PSMA2,EPAS1,RAD23B,EGR1,ANKRD1"
GO: Biological Process	oxoacid metabolic process	2.16E-04	2.29E-02	72	1071	"ACSL4,ACADS,SLC6A6,ACOT2,SOD2,ACY1,PPARGC1A,SMS,MTAP,ACSF2,ALDH1A3,PHGDH,FABP4,ALOX12B,ALOX5AP,MSMO1,PDP1,DDAH1,PADI4,PTPLA,ELOVL7,ASNS,L2HGDH,ALDH6A1,LIAS,GLS,OXSM,TLR2,HSD17B12,GLUL,SERINC5,PSAT1,C3,ADI1,MYO5A,GSTM5,CAV1,IDNK,GPX3,MTHFD1L,PARS2,CDO1,TARSL2,SPOCK2,AZIN1,PTGR1,CSGALNACT2,MPC1,CHST12,CPT1A,PDHA1,PDK4,CTPS1,IYD,IDH2,IDH1,CBR4,PRKAG2,NDNF,SLC7A5,CYP4V2,FADS2,ACOT7,GSTO1,PSMB9,EGLN3,PSMD10,PSMA6,NR1D1,PSMA2,CCBL2,EHHADH"
GO: Biological Process	positive regulation of cellular component movement	2.16E-04	2.29E-02	28	306	"CCBE1,TNFRSF14,FIGF,F2RL1,ANXA3,CXCL12,CORO1A,FN1,MMP14,TGFB2,ZNF580,TLR2,SUN2,BMP4,SERPINE1,BMP2,P2RY6,CXCL13,MAPK8,WNT5B,CXCR2,CYR61,PLAU,AMOT,ICAM1,ITGB1,CXCL10,BCAR1"
GO: Biological Process	embryonic process involved in female pregnancy	2.26E-04	2.35E-02	4	8	"ACSL4,CITED2,JUNB,ABCG2"
GO: Biological Process	monocarboxylic acid metabolic process	2.31E-04	2.36E-02	39	486	"ACSL4,ACADS,ACOT2,PPARGC1A,ACSF2,ALDH1A3,PHGDH,FABP4,ALOX12B,ALOX5AP,MSMO1,PDP1,PTPLA,ELOVL7,LIAS,OXSM,TLR2,HSD17B12,C3,MYO5A,CAV1,IDNK,MTHFD1L,PTGR1,MPC1,CHST12,CPT1A,PDHA1,PDK4,IDH2,IDH1,CBR4,PRKAG2,CYP4V2,FADS2,ACOT7,EGLN3,NR1D1,EHHADH"
GO: Biological Process	cytokine-mediated signaling pathway	2.43E-04	2.37E-02	33	388	"TNFRSF14,ADAR,F2RL1,XAF1,CXCL12,RQCD1,AXL,IFI30,IRF9,IFITM3,GBP2,CAMK2A,CAV1,CXCL13,STAT1,STAT2,NUP43,CNTF,TNFRSF19,IL1RAP,CXCR2,UBA7,KLF6,IFIT3,IFIT1,ICAM1,USP18,IRF7,IRF1,NLRC5,ISG15,EGR1,KRAS"
GO: Biological Process	positive regulation of cell death	2.46E-04	2.37E-02	37	454	"TNFSF10,ALDH1A3,APH1B,APAF1,PHLDA3,DDIT4,TGFB2,TGFB3,APH1A,BAK1,BTG1,BMP4,BMP2,BNIP3,BOK,PAWR,MYC,GADD45B,HBB,C12orf5,KLF11,NKX3-1,HP,MAPK8,CLU,VAV2,BCL2L11,CXCR2,IGFBP3,CYR61,CTGF,SP110,ITGB1,IRF1,ZBTB16,EGR1,ANKRD1"
GO: Biological Process	negative regulation of type I interferon production	2.49E-04	2.37E-02	8	39	"DDX58,TNFAIP3,PCBP2,IFIH1,GBP6,UBA7,NLRC5,ISG15"
GO: Biological Process	positive regulation of locomotion	2.54E-04	2.37E-02	28	309	"CCBE1,TNFRSF14,FIGF,F2RL1,ANXA3,CXCL12,CORO1A,FN1,MMP14,TGFB2,ZNF580,TLR2,SUN2,BMP4,SERPINE1,BMP2,P2RY6,CXCL13,MAPK8,WNT5B,CXCR2,CYR61,PLAU,AMOT,ICAM1,ITGB1,CXCL10,BCAR1"
GO: Biological Process	regulation of innate immune response	2.54E-04	2.37E-02	26	278	"PARP9,F2RL1,RSAD2,DDX58,TMEM173,TLR2,TNFAIP3,TRIM5,TAP1,NFKBIA,NFKB2,POLR3F,STAT1,STAT2,MAPK8,IFIH1,DDX60,CTSS,IFI16,CTSK,USP18,IRF7,IRF1,NLRC5,DUSP4,NR1D1"
GO: Biological Process	renal system development	2.69E-04	2.40E-02	26	279	"IQGAP1,ACTA2,ACVR2B,JAG1,WNK4,CITED2,APH1A,BMP4,BMP2,SPRY1,FSTL3,MYC,PYGO1,NID1,NKX3-1,STAT1,HOXA11,HOXD11,BCL2L11,CXCR2,PKD2,REN,KLF15,PTCD2,ZBTB16,EGR1"
GO: Biological Process	cellular response to oxygen levels	2.75E-04	2.40E-02	14	108	"PPARGC1A,SLC2A4,NDRG1,CITED2,TCEB1,BNIP3,CAV1,NKX3-1,STC2,ICAM1,EGLN3,EPAS1,EGR1,ANKRD1"
GO: Biological Process	response to lipid	2.77E-04	2.40E-02	51	698	"ACADS,HNRNPA0,SOD2,PPARGC1A,MICB,MMP14,LIAS,AXL,TGFB2,TGFB3,THRB,TLR2,TNFAIP3,CITED2,PGRMC2,CCND1,BMP4,SERPINE1,FZD7,GBP2,TRIM5,CAV1,NFKBIA,NKX3-1,STAT1,STC2,CDO1,HMGB2,WFDC1,NR1D2,CPT1A,WNT5B,GBP6,PDK4,IGFBP2,CTGF,IDH1,TNC,ICAM1,REN,CYP27B1,JUND,JUNB,ITGB1,CXCL10,PTGFR,LOX,NR1D1,EGR1,KRAS,ANKRD1"
GO: Biological Process	zymogen activation	2.77E-04	2.40E-02	15	121	"TNFSF10,APAF1,MMP14,BAK1,RPS27L,SERPINE1,BOK,MYC,NKX3-1,STAT1,PERP,MOAP1,BCL2L11,IFI16,EGLN3"
GO: Biological Process	negative regulation of cell proliferation	2.84E-04	2.40E-02	46	611	"SOD2,TNFRSF14,CD164,RASSF5,TES,FRK,ANG,RNF139,INCA1,ADAMTS8,GPNMB,TGFB2,TGFB3,TGFB1I1,KLF10,IFI30,TLR2,TNFAIP3,BAK1,IFITM3,GAS1,BTG1,BMP4,BMP2,PAWR,SPRY1,SPRY2,MYC,CNOT7,NDN,KLF11,CAV1,CXCL1,NKX3-1,STAT1,HMGA1,WFDC1,IGFBP3,IFIT3,PKD2,CD274,CYP27B1,ITGB1,IRF1,ZBTB16,TAX1BP3"
GO: Biological Process	positive regulation of interferon-beta production	2.91E-04	2.40E-02	6	22	"DDX58,TLR2,POLR3F,IFIH1,IRF7,IRF1"
GO: Biological Process	regulation of response to stress	2.91E-04	2.40E-02	64	934	"PARP9,PPP4R2,SOD2,AP1S2,FABP4,NEK6,F2RL1,ALOX5AP,RSAD2,CXCL12,DDX58,TMEM173,MCL1,MICB,TGFB2,TLR2,TNFAIP3,BAK1,SERPINE1,BMP2,FZD7,C3,PCBP2,MYC,GADD45B,TRIM5,C12orf5,CAV1,TAP1,NFKBIA,NFKB2,POLR3F,NKX3-1,STAT1,STAT2,DUSP19,CD47,CEBPG,HP,HMGA1,MAPK8,CNTF,IFIH1,NR1D2,CLU,DDX60,GBP6,CTGF,CTSS,IFIT1,IFI16,PLAU,CTSK,PBK,USP18,FAM175A,IRF7,IRF1,NLRC5,PSMD10,DUSP4,PSMA6,NR1D1,ANKRD1"
GO: Biological Process	blood vessel development	2.94E-04	2.40E-02	43	560	"CCBE1,ACTA2,ACVR2B,FIGF,JAG1,ANG,ANXA3,CXCL12,DDAH1,FN1,MMP14,TGFB2,ANGPTL4,TNFAIP3,CITED2,BAK1,BTG1,BMP4,SERPINE1,C3,CAV1,CXCL13,NKX3-1,STAT1,CHI3L1,PPP3R1,VAV2,CXCR2,COL5A1,COL8A1,CYR61,CTGF,PLAU,PKD2,AMOT,JUNB,ITGB1,FLVCR1,CXCL10,LOX,EPAS1,EGR1,EGR3"
GO: Biological Process	protein processing	3.08E-04	2.48E-02	25	266	"TNFSF10,SCG5,APH1B,RNF139,APAF1,MMP14,APH1A,BAK1,GAS1,RPS27L,SERPINE1,BOK,C3,MYC,NKX3-1,STAT1,PERP,MOAP1,CPE,BCL2L11,VPS35,IFI16,REN,EGLN3,LDLRAD3"
GO: Biological Process	cell-substrate adhesion	3.13E-04	2.49E-02	24	251	"FREM1,ACTN1,COL5A3,CORO1A,COL26A1,FN1,MMP14,AXL,HSD17B12,SERPINE1,FZD7,NID1,ITGA11,SPOCK2,BCL2L11,VIT,COL8A1,CYR61,CTGF,PLAU,NDNF,ITGB1,TMEM8B,LGALS1"
GO: Biological Process	cellular response to oxygen-containing compound	3.23E-04	2.53E-02	56	792	"PDGFD,SOD2,PPARGC1A,SLC2A4,RAB31,AXL,KLF10,ATP6V1B2,ZNF580,TLR2,TNFAIP3,BMP4,SERPINE1,BNIP3,FZD7,GBP2,MYO5A,TRIM5,RRAGD,HBB,KLF11,GPR39,GPX3,NFKBIA,STAT1,HP,HMGB2,MAPK8,TBC1D4,CISH,AP3S1,CPT1A,WNT5B,GBP6,PDK4,COL6A1,CYBA,PRKAG2,PKD2,TNC,ICAM1,CYP27B1,HMGN3,RHOQ,ITGB1,IRF1,KLF15,CAB39,BCAR1,CAB39L,NR1D1,LGALS1,EGR1,EGR3,KRAS,ANKRD1"
GO: Biological Process	adhesion to other organism involved in symbiotic interaction	3.39E-04	2.60E-02	5	15	"GBP2,GBP3,GBP7,GBP6,ICAM1"
GO: Biological Process	response to abiotic stimulus	3.42E-04	2.60E-02	67	995	"ACOT2,SOD2,PPARGC1A,SLC2A4,ANG,CXCL12,MICB,ASNS,DNAJB4,MMP14,DDIT4,ATP1B1,LXN,TGFB2,TGFB3,TGFB1I1,TLR2,ANGPTL4,RAD18,NDRG1,CITED2,BAK1,CCND1,GMPR,TCEB1,BMP2,BNIP3,SLC52A3,AKR1B10,MYC,GTF2H2,BHLHE40,CAV1,NFKBIA,NKX3-1,STAT1,STC2,CHI3L1,MAPK8,PER1,IGFBP2,CTGF,PLOD2,IFI16,CYBA,PLAU,PKD2,TNC,ICAM1,PBK,KCNA5,RBM3,JUND,JUNB,ITGB1,FAM175A,IRF1,CXCL10,EGLN3,TSC22D3,LIG4,EPAS1,LDLR,HSPB7,EGR1,KRAS,ANKRD1"
GO: Biological Process	activation of cysteine-type endopeptidase activity	3.58E-04	2.69E-02	13	98	"TNFSF10,APAF1,BAK1,RPS27L,BOK,MYC,NKX3-1,STAT1,PERP,MOAP1,BCL2L11,IFI16,EGLN3"
GO: Biological Process	positive regulation of type I interferon production	3.72E-04	2.75E-02	11	74	"DDX58,TMEM173,TLR2,NFKBIA,NFKB2,POLR3F,TRIM21,IFIH1,IFI16,IRF7,IRF1"
GO: Biological Process	muscle organ development	3.80E-04	2.77E-02	31	365	"CD164,FHL3,SGCB,VAMP5,SRPK3,MAFF,USP2,CITED2,BTG1,BMP4,BMP2,MYC,TAGLN,MYLPF,CAV1,ITGA11,SMYD1,HOXD9,HOXD10,CNTF,NR1D2,IGFBP3,PLAGL1,FOXN2,PTCD2,CXCL10,TSC22D3,PSMA6,EGR1,EGR3,ANKRD1"
GO: Biological Process	water-soluble vitamin biosynthetic process	3.93E-04	2.82E-02	4	9	"PSAT1,MMACHC,RFK,GSTO1"
GO: Biological Process	positive regulation of immune system process	3.99E-04	2.82E-02	51	709	"TNFRSF14,FIGF,BLOC1S3,F2RL1,RSAD2,CXCL12,DDX58,CORO1A,WASL,TMEM173,MICB,AXL,TGFB2,ZNF580,TLR2,TNFAIP3,SERPINE1,PAWR,C3,STXBP2,TRIM5,CAV1,TAP1,CXCL13,NFKBIA,NFKB2,POLR3F,CD47,MAPK8,IFIH1,CLU,VAV2,DDX60,CXCR2,ARPC5,IGFBP2,MAP3K8,CTSS,IFI16,CTSK,ICAM1,CD274,IRF7,IRF1,CXCL10,BCAR1,DUSP4,LIMK1,NR1D1,LGALS1,EGR3"
GO: Biological Process	response to endogenous stimulus	4.02E-04	2.82E-02	86	1360	"ACADS,TNFSF10,PDGFD,SORD,PPARGC1A,FRS3,JAG1,SLC2A4,GPIHBP1,ANG,APAF1,CXCL12,ASNS,KITLG,MMP14,RAB31,TGFB2,TGFB3,TGFB1I1,KLF10,THRB,TIMP1,ATP6V1B2,TLR2,TNFAIP3,CITED2,PGRMC2,CCND1,KLF9,BMP4,SERPINE1,BMP2,SPRY1,SPRY2,TFDP2,MYC,MYO5A,RRAGD,CCNC,HCLS1,KLF11,CAV1,CXCL13,NFKBIA,NKX3-1,STAT1,STC2,CDO1,RAB14,HMGB2,WFDC1,TBC1D4,CISH,NR1D2,AP3S1,PDK4,COL6A1,IGFBP2,CTGF,IDH1,CTSS,CYBA,PRKAG2,PKD2,TNC,ICAM1,REN,KCNK1,CYP27B1,RBL1,JUND,JUNB,RHOQ,ITGB1,IRF1,KLF15,E2F5,CAB39,BCAR1,LOX,CAB39L,NR1D1,EGR1,EGR3,KRAS,ANKRD1"
GO: Biological Process	activation of innate immune response	4.07E-04	2.82E-02	19	181	"F2RL1,RSAD2,DDX58,TMEM173,TLR2,TNFAIP3,TRIM5,NFKBIA,NFKB2,MAPK8,IFIH1,DDX60,CTSS,IFI16,CTSK,IRF7,IRF1,DUSP4,NR1D1"
GO: Biological Process	organic acid biosynthetic process	4.25E-04	2.87E-02	28	319	"MTAP,ALDH1A3,PHGDH,ALOX12B,ALOX5AP,MSMO1,PADI4,PTPLA,ELOVL7,ASNS,LIAS,GLS,OXSM,HSD17B12,GLUL,PSAT1,ADI1,MYO5A,MTHFD1L,CDO1,PTGR1,CHST12,PDK4,CBR4,PRKAG2,FADS2,GSTO1,NR1D1"
GO: Biological Process	carboxylic acid biosynthetic process	4.25E-04	2.87E-02	28	319	"MTAP,ALDH1A3,PHGDH,ALOX12B,ALOX5AP,MSMO1,PADI4,PTPLA,ELOVL7,ASNS,LIAS,GLS,OXSM,HSD17B12,GLUL,PSAT1,ADI1,MYO5A,MTHFD1L,CDO1,PTGR1,CHST12,PDK4,CBR4,PRKAG2,FADS2,GSTO1,NR1D1"
GO: Biological Process	positive regulation of cysteine-type endopeptidase activity	4.31E-04	2.88E-02	15	126	"TNFSF10,APAF1,BAK1,RPS27L,BOK,MYC,NKX3-1,STAT1,PERP,MOAP1,BCL2L11,CYR61,CTGF,IFI16,EGLN3"
GO: Biological Process	cellular response to hypoxia	4.37E-04	2.88E-02	13	100	"PPARGC1A,SLC2A4,NDRG1,CITED2,TCEB1,BNIP3,NKX3-1,STC2,ICAM1,EGLN3,EPAS1,EGR1,ANKRD1"
GO: Biological Process	negative regulation of phosphorylation	4.45E-04	2.90E-02	27	304	"ADAR,FABP4,F2RL1,FAM129A,INCA1,DDIT4,TNFAIP3,BAK1,BMP4,SPRY1,SPRY2,MYC,GADD45B,CAV1,DYNLL1,DUSP19,PPM1E,CAMK2N1,GBP6,IGFBP3,PRKAG2,PBK,KIRREL2,IRF1,PSMD10,DUSP5,DUSP4"
GO: Biological Process	positive regulation of developmental process	4.71E-04	3.03E-02	59	859	"ACVR2B,PPARGC1A,JAG1,ETV5,PIAS2,ANXA3,MAN2A1,CXCL12,DDAH1,FN1,KITLG,USP2,AXL,TGFB2,TGFB3,TGFB1I1,KLF10,THRB,TLR2,ANGPTL4,CITED2,BTG1,BMP4,SERPINE1,BMP2,BNIP3,SPRY1,C3,MYC,HCLS1,CHI3L1,SMYD1,HOXA11,HOXD11,HMGA1,HMGB2,MAPK8,CNTF,CLU,WNT5B,CREBL2,CXCR2,IGFBP3,CYR61,CTGF,IFI16,AMOT,PDLIM7,CYP27B1,JUND,JUNB,ITGB1,IRF1,NLGN2,LIG4,LIMK1,ISG15,ZBTB16,EGR3"
GO: Biological Process	fatty acid metabolic process	4.91E-04	3.12E-02	29	338	"ACSL4,ACADS,ACOT2,PPARGC1A,ACSF2,FABP4,ALOX12B,ALOX5AP,MSMO1,PDP1,PTPLA,ELOVL7,LIAS,OXSM,TLR2,HSD17B12,C3,MYO5A,CAV1,PTGR1,CPT1A,PDHA1,PDK4,CBR4,PRKAG2,CYP4V2,FADS2,ACOT7,EHHADH"
GO: Biological Process	angiogenesis	5.23E-04	3.26E-02	33	405	"CCBE1,FIGF,JAG1,ANG,ANXA3,CXCL12,DDAH1,FN1,MMP14,TGFB2,ANGPTL4,TNFAIP3,BAK1,BTG1,BMP4,SERPINE1,C3,CAV1,CXCL13,STAT1,CHI3L1,PPP3R1,VAV2,CXCR2,COL8A1,CYR61,CTGF,PLAU,AMOT,ITGB1,CXCL10,EPAS1,EGR3"
GO: Biological Process	cellular response to decreased oxygen levels	5.30E-04	3.26E-02	13	102	"PPARGC1A,SLC2A4,NDRG1,CITED2,TCEB1,BNIP3,NKX3-1,STC2,ICAM1,EGLN3,EPAS1,EGR1,ANKRD1"
GO: Biological Process	regulation of cartilage development	5.32E-04	3.26E-02	9	54	"THRB,BMP4,BMP2,HOXA11,HOXD11,CYR61,CTGF,MAF,ZBTB16"
GO: Biological Process	actin filament organization	5.53E-04	3.36E-02	24	261	"ACTN1,WASF1,F2RL1,ANG,PHACTR1,CXCL12,CORO1A,WASL,CDC42EP5,PAWR,CAPG,CAPZA2,HCLS1,EVL,PPM1E,CFL2,PFN2,ARPC5,CTGF,AMOT,ICAM1,BCAR1,DPYSL3,LIMK1"
GO: Biological Process	ossification	6.00E-04	3.59E-02	28	326	"ACVR2B,RSAD2,PIAS2,OSTF1,MGP,MMP14,GPNMB,TGFB2,TGFB3,KLF10,THRB,BMP4,BMP2,FSTL3,CDH11,RASSF2,FBXL15,MAPK8,CYR61,CTGF,IFI16,CTSK,PDLIM7,CYP27B1,JUND,JUNB,IFITM5,ZBTB16"
GO: Biological Process	response to hormone	6.05E-04	3.59E-02	57	831	"ACADS,TNFSF10,SORD,PPARGC1A,SLC2A4,ANG,CXCL12,ASNS,MMP14,RAB31,TGFB2,TGFB3,THRB,TIMP1,ATP6V1B2,TLR2,CITED2,PGRMC2,CCND1,KLF9,BMP4,MYO5A,HCLS1,CAV1,NKX3-1,STAT1,STC2,CDO1,HMGB2,WFDC1,TBC1D4,CISH,NR1D2,AP3S1,PDK4,IGFBP2,CTGF,IDH1,CTSS,PRKAG2,TNC,ICAM1,REN,CYP27B1,JUND,JUNB,RHOQ,ITGB1,IRF1,CAB39,BCAR1,LOX,CAB39L,NR1D1,EGR1,EGR3,KRAS"
GO: Biological Process	cellular response to virus	6.49E-04	3.81E-02	5	17	"DDX58,IFIH1,BCL2L11,DDX60,IRF7"
GO: Biological Process	negative regulation of protein modification process	6.67E-04	3.88E-02	32	394	"ADAR,FABP4,FAM129A,INCA1,ATP2B4,DDIT4,TNFAIP3,BAK1,BMP4,SPRY1,SPRY2,GADD45B,CAV1,TRIM21,DUSP19,PPM1E,CAMK2N1,GBP6,IGFBP3,PRKAG2,PBK,KIRREL2,IRF1,KLF15,PSMB9,PSMD10,DUSP5,DUSP4,LIMK1,PSMA6,PSMA2,ISG15"
GO: Biological Process	cellular response to lipid	6.97E-04	4.01E-02	27	313	"PPARGC1A,AXL,THRB,TLR2,TNFAIP3,PGRMC2,BMP4,SERPINE1,FZD7,GBP2,TRIM5,NFKBIA,NKX3-1,STAT1,HMGB2,NR1D2,CPT1A,WNT5B,GBP6,PDK4,TNC,ICAM1,CYP27B1,ITGB1,NR1D1,EGR1,ANKRD1"
GO: Biological Process	regulation of multi-organism process	7.09E-04	4.04E-02	23	250	"ADAR,AP1S2,F2RL1,RSAD2,DDX58,TMEM173,MICB,TIMP1,TLR2,TNFAIP3,IFITM3,TCEB1,PCBP2,TRIM5,GTF2H2,GTF2F2,CCNH,BCL2L11,DDX60,GBP6,IFIT1,IFI16,ISG15"
GO: Biological Process	protein maturation	7.71E-04	4.34E-02	25	283	"TNFSF10,SCG5,APH1B,RNF139,APAF1,MMP14,APH1A,BAK1,GAS1,RPS27L,SERPINE1,BOK,C3,MYC,NKX3-1,STAT1,PERP,MOAP1,CPE,BCL2L11,VPS35,IFI16,REN,EGLN3,LDLRAD3"
GO: Biological Process	cellular lipid metabolic process	8.04E-04	4.48E-02	61	915	"PEX11A,ACSL4,ACADS,MTMR1,ACOT2,PPARGC1A,MTM1,ACSF2,NEU3,ALDH1A3,FABP4,ALOX12B,ALOX5AP,ANG,MSMO1,PDP1,PTPLA,ELOVL7,SGMS2,LIAS,THRB,OXSM,CERCAM,TLR2,HSD17B12,ANGPTL4,CEPT1,SERINC5,AKR1B10,C3,SPTSSA,MYO5A,CAV1,PPAP2C,CHKA,ISYNA1,ARSG,PTGR1,CPT1A,PDHA1,PDK4,CYR61,CTGF,IDI1,IDH1,CBR4,PRKAG2,ST8SIA2,VAPA,MBOAT2,SH3YL1,A4GALT,CYP4V2,FADS2,INPP1,ACOT7,COLGALT2,PIGM,LDLR,EHHADH,ANKRD1"
GO: Biological Process	cytokine production	8.37E-04	4.59E-02	41	554	"IQGAP1,TNFRSF14,FIGF,FABP4,F2RL1,RSAD2,DDX58,TMEM173,AXL,TGFB2,TGFB3,ZNF580,TLR2,IRF9,TNFAIP3,SERPINE1,PAWR,C3,PCBP2,HILPDA,IGF2BP2,NFKBIA,NFKB2,POLR3F,TRIM21,CHI3L1,CEBPG,IFIH1,DDX60,IL1RAP,GBP6,UBA7,IFI16,RASGRP1,REL,CD274,IRF7,IRF1,NLRC5,MAF,ISG15"
GO: Biological Process	cellular response to inorganic substance	8.40E-04	4.59E-02	13	107	"IQGAP1,PPARGC1A,FABP4,ALOX5AP,FN1,BNIP3,SLC25A24,FSTL3,GPR39,MAPK8,JUND,JUNB,LIG4"
GO: Biological Process	regulation of cell death	8.82E-04	4.76E-02	86	1395	"TNFSF10,ACTN1,SOD2,ADAR,PPARGC1A,ALDH1A3,PLK2,APH1B,APAF1,PHLDA3,CXCL12,MCL1,FN1,ASNS,INCA1,KITLG,DDIT4,AXL,TGFB2,TGFB3,TIMP1,ANGPTL4,TNFAIP3,CITED2,APH1A,BAK1,GAS1,RPS27L,BTG1,BMP4,SERPINE1,BMP2,BNIP3,BOK,SLC25A24,PAWR,SPRY2,MYC,GADD45B,HBB,C12orf5,HCLS1,KLF11,CAV1,DYNLL1,NFKBIA,NKX3-1,STAT1,PLEKHF1,MOAP1,HP,HMGB2,MAPK8,CNTF,IFIH1,CLU,PPP3R1,VAV2,BCL2L11,CXCR2,PDK4,IGFBP3,CYR61,CTGF,IFIT3,SP110,NDNF,REL,ITGB1,IRF7,IRF1,PSMB9,EGLN3,PSMD10,PTGFR,BCAR1,TSC22D3,LIG4,PSMA6,PSMA2,LGALS1,ZBTB16,EGR1,EGR3,KRAS,ANKRD1"
GO: Biological Process	positive regulation of endopeptidase activity	8.94E-04	4.78E-02	15	135	"TNFSF10,APAF1,BAK1,RPS27L,BOK,MYC,NKX3-1,STAT1,PERP,MOAP1,BCL2L11,CYR61,CTGF,IFI16,EGLN3"
GO: Biological Process	negative regulation of protein phosphorylation	9.30E-04	4.89E-02	23	255	"ADAR,FABP4,FAM129A,INCA1,DDIT4,TNFAIP3,BAK1,BMP4,SPRY1,SPRY2,GADD45B,CAV1,DUSP19,PPM1E,CAMK2N1,GBP6,IGFBP3,PRKAG2,PBK,KIRREL2,IRF1,DUSP5,DUSP4"
GO: Biological Process	negative regulation of leukocyte apoptotic process	9.32E-04	4.89E-02	8	47	"CXCL12,KITLG,AXL,BMP4,HCLS1,CXCR2,IRF7,TSC22D3"
