# Supplementary material for: Pathogenic pathways are activated in each major cell type of the glomerulus in the Cd2ap mutant mouse model of focal segmental glomerulosclerosis
Source: BMC Nephrol. 2015 May 13;16:71. doi: 10.1186/s12882-015-0063-z (PMC4430919; doi:10.1186/s12882-015-0063-z)
Supplement: Additional file 12: Table S12. — Microarray defined genes upregulated in Cd2ap mutant endothelial cells. Filtered for fold change > 1.5 and raw signal > 100. Columns show gene symbol, fold change, RNA seq validation fold change and transcript cluster ID. [file 12882_2015_63_MOESM12_ESM.xls]

Gene Symbol	Fold Change	Gene Description	RNA-seq FC	Transcripts Cluster Id
Rasgrp3	6.491909	"RAS, guanyl releasing protein 3"	5.4	10446965
Emcn	5.001582	endomucin	2.58	10496359
Kdr	4.8567953	kinase insert domain protein receptor	3.91	10530692
Gimap4	4.445898	"GTPase, IMAP family member 4"	1.85	10538126
Klk1|Klk1b5|Klk1b4	4.1938534	kallikrein 1 | kallikrein 1-related peptidase b5 | kallikrein 1-related pepidase b4	14.78	10552546
Tspan7	3.9964643	tetraspanin 7	1.82	10598626
Tek	3.8803813	endothelial-specific receptor tyrosine kinase	3.5	10505954
Abca9	3.8386054	"ATP-binding cassette, sub-family A (ABC1), member 9"	3.76	10392560
Mrc1	3.7443693	"mannose receptor, C type 1"	2.26	10469358
Gimap6	3.6976688	"GTPase, IMAP family member 6"	1.88	10544583
Asb15	3.63816	ankyrin repeat and SOCS box-containing 15	2.87	10536697
Rtp3	3.576753	receptor transporter protein 3	12.04	10589695
Lphn2	3.5700002	latrophilin 2	1.62	10502780
Eltd1	3.4772985	"EGF, latrophilin seven transmembrane domain containing 1"	1.58	10496872
Calcrl	3.3519144	calcitonin receptor-like	1.36	10484371
Ptprb	3.287541	"protein tyrosine phosphatase, receptor type, B"	4.59	10366476
Sdpr	3.2045078	serum deprivation response	1.81	10346164
Cdh5	3.112531	cadherin 5	2.52	10574438
Adamts5	3.0881324	"a disintegrin-like and metallopeptidase (reprolysin type) with thrombospondin type 1 motif, 5 (aggrecanase-2)"	1.8	10440534
Ehd3	3.0500786	EH-domain containing 3	2.07	10446777
Itga4	3.0380158	integrin alpha 4	1.34	10473125
Gpr116	3.014509	G protein-coupled receptor 116	1.57	10445268
Igfbp5	3.0136485	insulin-like growth factor binding protein 5	1.84	10355500
Cd34	2.9983404	CD34 antigen	1.6	10352905
Prex2	2.941564	"phosphatidylinositol-3,4,5-trisphosphate-dependent Rac exchange factor 2"	1.53	10344837
Pecam1	2.859849	platelet/endothelial cell adhesion molecule 1	1.45	10392221
Clec14a	2.8353212	"C-type lectin domain family 14, member a"	2	10400510
Serpini1	2.8208635	"serine (or cysteine) peptidase inhibitor, clade I, member 1"	1.52	10492628
Itga8	2.7674503	integrin alpha 8	1.49	10480090
Flt1	2.7639081	FMS-like tyrosine kinase 1	3.39	10535807
Gucy1a2	2.7123103	"guanylate cyclase 1, soluble, alpha 2"	1.23	10582958
	2.694687			10598064
Ctsh	2.6799684	cathepsin H	3.5	10587733
Sulf1	2.6714492	sulfatase 1	3.26	10344897
Olfr1396	2.668154	olfactory receptor 1396	109.83	10385540
Ldb2	2.6309788	LIM domain binding 2	2.1	10529875
Mecom	2.6294708	MDS1 and EVI1 complex locus	1.83	10497590
	2.6219985			10598062
Nrp1	2.572096	neuropilin 1	2	10576639
Entpd1	2.5602498	ectonucleoside triphosphate diphosphohydrolase 1	1.51	10463070
Cd24a	2.5345256	CD24a antigen	1.25	10362896
Sfrp2	2.5055285	secreted frizzled-related protein 2	1.36	10492798
Klf12	2.4890616	Kruppel-like factor 12	2.08	10422013
Acpp	2.4651067	"acid phosphatase, prostate"	7.4	10596303
4932438A13Rik	2.4529295	RIKEN cDNA 4932438A13 gene		10491609
Nostrin	2.43595	nitric oxide synthase trafficker		10472514
Pde7b	2.3907027	phosphodiesterase 7B	not validated	10368175
Ncf2	2.389679	neutrophil cytosolic factor 2	2.22	10350689
Tmem182	2.3881547	transmembrane protein 182	1.71	10345869
4932438A13Rik	2.3823044	RIKEN cDNA 4932438A13 gene		10491611
Sema6d	2.3636985	"sema domain, transmembrane domain (TM), and cytoplasmic domain, (semaphorin) 6D"	1.28	10475544
	2.3195472			10381695
Ccdc80	2.304191	coiled-coil domain containing 80	1.23	10435948
Ube2v2	2.3038788	ubiquitin-conjugating enzyme E2 variant 2		10437942
Meis2	2.2924123	Meis homeobox 2	2.02	10486041
Pdgfra	2.2720983	"platelet derived growth factor receptor, alpha polypeptide"	1.85	10522503
Palmd	2.2551117	palmdelphin	4.39	10501734
Cd97	2.2471101	CD97 antigen	1.66	10580033
Dkk2	2.245528	dickkopf homolog 2 (Xenopus laevis)	2.35	10496125
Arntl	2.2329545	aryl hydrocarbon receptor nuclear translocator-like	8.25	10556463
Eng	2.2191522	endoglin	1.87	10471486
	2.215749			10598073
Epas1	2.2038355	endothelial PAS domain protein 1	1.72	10447317
Gucy1a3	2.1986642	"guanylate cyclase 1, soluble, alpha 3"	1.62	10498952
F8	2.1967804	coagulation factor VIII	4.28	10605392
Itga6	2.1954572	integrin alpha 6	not validated	10472820
Cd38	2.1896858	CD38 antigen	not validated	10521678
Heg1	2.1871858	HEG homolog 1 (zebrafish)	2.84	10435271
Rgs2	2.1755548	regulator of G-protein signaling 2	1.27	10358389
S1pr3	2.1647317	sphingosine-1-phosphate receptor 3	1.18	10405179
1810011O10Rik	2.1603668	RIKEN cDNA 1810011O10 gene		10577641
Mir29c|A330023F24Rik	2.1559665	microRNA 29c | RIKEN cDNA A330023F24 gene		10352918
Gja5	2.1520705	"gap junction protein, alpha 5"	1.29	10494548
Glb1l2	2.148942	"galactosidase, beta 1-like 2"	3.48	10591884
Gm14403	2.1470497	predicted gene 14403		10479221
Ssh2	2.145533	slingshot homolog 2 (Drosophila)	1.53	10378833
Prkca	2.1320944	"protein kinase C, alpha"	1.2	10392388
Blmh	2.1209934	bleomycin hydrolase	1.68	10378802
Npr3	2.1193898	natriuretic peptide receptor 3	2.51	10427796
Fmo1	2.0804718	flavin containing monooxygenase 1	6.03	10359571
Rgl1	2.078869	"ral guanine nucleotide dissociation stimulator,-like 1"	2.61	10358733
Efnb2	2.0553107	ephrin B2	1.17	10576911
Gngt2|Abi3	2.0504699	"guanine nucleotide binding protein (G protein), gamma transducing activity polypeptide 2 | ABI gene family, member 3"	1.83	10380571
Pdgfrb	2.0402846	"platelet derived growth factor receptor, beta polypeptide"	1.42	10456046
Cyyr1	2.035799	cysteine and tyrosine-rich protein 1	2.13	10440513
Lctl|Zwilch	2.0353167	"lactase-like | Zwilch, kinetochore associated, homolog (Drosophila)"	3.26	10586140
Rap2a	2.0296206	RAS related protein 2a	not validated	10417065
Ccrl2	2.0254688	chemokine (C-C motif) receptor-like 2	2.22	10597279
Pip4k2a	2.0235443	"phosphatidylinositol-5-phosphate 4-kinase, type II, alpha"	1.29	10480347
Plk1s1	2.0082507	polo-like kinase 1 substrate 1	1.86	10476819
Antxr2	2.005917	anthrax toxin receptor 2	2.39	10531560
S1pr1	2.0054553	sphingosine-1-phosphate receptor 1	3.04	10501586
Lrrc8c	1.9957588	"leucine rich repeat containing 8 family, member C"	1.59	10523766
Mmrn2	1.9805372	multimerin 2	2	10414102
Snai2	1.9702189	snail homolog 2 (Drosophila)	1.61	10433776
Itgb8	1.9681997	integrin beta 8	3.94	10403229
Fam38b	1.944961	"family with sequence similarity 38, member B"	1.09	10459353
Erg	1.9434108	avian erythroblastosis virus E-26 (v-ets) oncogene related	4.93	10441093
Tspan8	1.9355942	tetraspanin 8		10366446
A430107O13Rik	1.931378	RIKEN cDNA A430107O13 gene		10536635
Rapgef4	1.9311548	Rap guanine nucleotide exchange factor (GEF) 4	1.43	10472860
Tubb2b	1.9306409	"tubulin, beta 2B"	1.97	10408613
Hrsp12	1.9237536	heat-responsive protein 12	not validated	10428081
Ramp2	1.9193201	receptor (calcitonin) activity modifying protein 2	2.06	10381298
Ptprg	1.9118229	"protein tyrosine phosphatase, receptor type, G"	2.09	10412667
Leo1	1.9086015		3.51	10587211
Fli1	1.9031585	Friend leukemia integration 1	1.52	10592067
Tbx3	1.9017355	T-box 3	1.5	10525016
Prkch	1.8946395	"protein kinase C, eta"	3.12	10396402
Ide	1.8877866	insulin degrading enzyme	1.67	10467230
Ifngr1	1.8764925	interferon gamma receptor 1	2.02	10361897
Vti1b|Arg2	1.8743471	vesicle transport through interaction with t-SNAREs 1B homolog | arginase type II	3.59	10401172
Pbrm1	1.8730525	polybromo 1		10413695
Uchl3	1.8613728	ubiquitin carboxyl-terminal esterase L3 (ubiquitin thiolesterase)		10416793
Pcdh18	1.8599788	protocadherin 18	1.22	10498018
Gstm1	1.8573071	"glutathione S-transferase, mu 1"	1.67	10501229
Plcb1	1.856891	"phospholipase C, beta 1"	3.09	10476401
Myo9a	1.855896	myosin IXa	not validated	10585970
Klhdc10	1.8393271	kelch domain containing 10	not validated	10536996
4930412O13Rik	1.8352287	RIKEN cDNA 4930412O13 gene		10469138
Arhgef3	1.8336573	Rho guanine nucleotide exchange factor (GEF) 3	2	10413419
Hspa1a|Hspa1b	1.8275781	heat shock protein 1A | heat shock protein 1B	2.28	10444589
Gpd2	1.8242699	"glycerol phosphate dehydrogenase 2, mitochondrial"	1.95	10472162
Abca5	1.8128554	"ATP-binding cassette, sub-family A (ABC1), member 5"	1.39	10392642
Lifr	1.8061712	leukemia inhibitory factor receptor	not validated	10422822
Gnpnat1	1.8047838	glucosamine-phosphate N-acetyltransferase 1		10460108
Elk3|Cdk17	1.8042353	"ELK3, member of ETS oncogene family | cyclin-dependent kinase 17"	2.34	10371959
Ctso	1.801377	cathepsin O	1.34	10492699
Rab30	1.8002521	"RAB30, member RAS oncogene family"	1.66	10554938
Arap2	1.7980136	"ArfGAP with RhoGAP domain, ankyrin repeat and PH domain 2"	1.54	10530100
Ei24	1.796868	etoposide induced 2.4 mRNA	1.66	10592237
Pik3r3	1.7935224	"phosphatidylinositol 3 kinase, regulatory subunit, polypeptide 3 (p55)"	1.63	10507273
Egf	1.7933782	epidermal growth factor	3.59	10502105
Gimap8	1.7918867	"GTPase, IMAP family member 8"	2.1	10538115
Myct1	1.7880517	myc target 1	1.63	10367591
Afap1l2	1.7872907	actin filament associated protein 1-like 2	2.42	10468668
Nlk	1.7872627	nemo like kinase	2	10388884
Ptprm	1.7845266	"protein tyrosine phosphatase, receptor type, M"	1.8	10452571
Pla2g4a	1.7813584	"phospholipase A2, group IVA (cytosolic, calcium-dependent)"	not validated	10358434
Galnt7	1.7764695	UDP-N-acetyl-alpha-D-galactosamine: polypeptide N-acetylgalactosaminyltransferase 7	1.85	10578771
Calml4	1.7716519	calmodulin-like 4	1.8	10586118
Asb7	1.7681625	ankyrin repeat and SOCS box-containing 7	1.65	10564448
Ppap2a	1.766937	phosphatidic acid phosphatase type 2A	1.62	10407211
Pank1	1.7665261	pantothenate kinase 1		10467162
Pitpnc1	1.765673	"phosphatidylinositol transfer protein, cytoplasmic 1"	not validated	10392347
Aftph	1.7655239	aftiphilin	not validated	10384555
Tspan12	1.7609184	tetraspanin 12	1.16	10543306
A130022J15Rik	1.7602736	RIKEN cDNA A130022J15 gene		10546567
Gadd45a	1.7546315	growth arrest and DNA-damage-inducible 45 alpha	3.86	10545130
Kctd12b	1.7491937	potassium channel tetramerisation domain containing 12b	not validated	10607403
Ets1	1.7466145	"E26 avian leukemia oncogene 1, 5' domain"	not validated	10584142
Astn2	1.7455639	astrotactin 2	2.86	10513776
Atpbd4	1.7450241	ATP binding domain 4	1.18	10486029
Sp140|A530032D15Rik	1.7423824	Sp140 nuclear body protein | RIKEN cDNA A530032D15Rik gene	not validated	10356269
Psd3	1.7405369	pleckstrin and Sec7 domain containing 3	1.66	10578989
Slc25a37	1.738054	"solute carrier family 25, member 37"	1.71	10421172
Vps26b	1.7377335	vacuolar protein sorting 26 homolog B (yeast)	not validated	10591960
Nek1	1.7376049	NIMA (never in mitosis gene a)-related expressed kinase 1	2.09	10571922
Gpcpd1	1.73704	glycerophosphocholine phosphodiesterase GDE1 homolog (S. cerevisiae)	1.29	10487945
Npl	1.7359557	N-acetylneuraminate pyruvate lyase	1.77	10358879
Pcp4l1	1.7336942	Purkinje cell protein 4-like 1	2.21	10360053
Cdkl5	1.7239612	cyclin-dependent kinase-like 5	1.76	10607619
	1.7143152			10523901
Nkiras1	1.7140056	NFKB inhibitor interacting Ras-like protein 1	1.17	10412900
Pi16	1.7134949	peptidase inhibitor 16	6.77	10443494
Gstm2	1.712326	"glutathione S-transferase, mu 2"	not validated	10501222
Plscr1	1.710875	phospholipid scramblase 1	not validated	10356082
Sgip1	1.7069623	SH3-domain GRB2-like (endophilin) interacting protein 1	2.29	10506360
Sema6a	1.7020376	"sema domain, transmembrane domain (TM), and cytoplasmic domain, (semaphorin) 6A"	4.79	10458843
Mblac2	1.699066	metallo-beta-lactamase domain containing 2	1.59	10406423
Pla2r1	1.6981053	phospholipase A2 receptor 1	not validated	10482968
2610018G03Rik	1.6955276	RIKEN cDNA 2610018G03 gene		10599581
Tmem50b	1.6898057	transmembrane protein 50B		10440918
1110067D22Rik	1.6884463	RIKEN cDNA 1110067D22 gene		10384572
Ephb1	1.6878922	Eph receptor B1	7.35	10596095
Fundc1	1.6877592	FUN14 domain containing 1	not validated	10603785
Sqrdl	1.6818388	sulfide quinone reductase-like (yeast)	1.98	10475532
Gtpbp10	1.6702771	GTP-binding protein 10 (putative)	not validated	10578069
A530032D15Rik	1.6699934			10356267
Spats2l	1.6690136	"spermatogenesis associated, serine-rich 2-like"	2.32	10346348
Gnpnat1|Styx	1.6689172	glucosamine-phosphate N-acetyltransferase 1 | serine/threonine/tyrosine interaction protein	not validated	10419216
Smg7	1.6683685	"Smg-7 homolog, nonsense mediated mRNA decay factor (C. elegans)"	not validated	10358757
Elovl5	1.6666732	"ELOVL family member 5, elongation of long chain fatty acids (yeast)"	not validated	10587284
Ets2	1.666131	"E26 avian leukemia oncogene 2, 3' domain"	not validated	10437160
Cyb5d1|Gm6685	1.6647627	cytochrome b5 domain containing 1 | cytochrome b5 domain containing 1 pseudogene	1.55	10384795
Pla2g16	1.6630934	"phospholipase A2, group XVI"	1.48	10461093
Sh3kbp1	1.6621454	SH3-domain kinase binding protein 1	3.05	10602840
Sort1	1.6608093	sortilin 1	1.78	10495285
C1galt1c1	1.6599863	C1GALT1-specific chaperone 1	not validated	10604226
Chordc1	1.6578205	"cysteine and histidine-rich domain (CHORD)-containing, zinc-binding protein 1"	not validated	10583347
	1.6541479			10407122
Htra1	1.6484644	HtrA serine peptidase 1	3.21	10558150
Arhgap12	1.6481831	Rho GTPase activating protein 12	2.56	10457250
Slc26a7	1.6458579	"solute carrier family 26, member 7"	1.64	10511631
Ccdc46	1.6445656	coiled-coil domain containing 46	2.35	10382200
Itga2	1.6425072	integrin alpha 2	2.05	10412267
Plat	1.6408114	"plasminogen activator, tissue"	1.8	10570855
Cspp1	1.6404501	centrosome and spindle pole associated protein 1	1.27	10344805
Nfil3	1.6392323	"nuclear factor, interleukin 3, regulated"	4.21	10409278
Rab11fip2	1.6378714	RAB11 family interacting protein 2 (class I)	not validated	10468795
Efemp1	1.637079	epidermal growth factor-containing fibulin-like extracellular matrix protein 1	1.59	10374777
Myo1d	1.6369388	myosin ID	2.7	10389022
Cyp20a1	1.6361028	"cytochrome P450, family 20, subfamily A, polypeptide 1"	not validated	10346747
Myo10	1.6331236	myosin X	1.96	10423293
Plscr2	1.6330556	phospholipid scramblase 2	1.12	10587799
Psmd10	1.6327165	"proteasome (prosome, macropain) 26S subunit, non-ATPase, 10"	not validated	10607004
Magt1	1.6326587	magnesium transporter 1	1.11	10606301
4932438A13Rik	1.6321307	RIKEN cDNA 4932438A13 gene		10491619
Tmeff2	1.6316919	transmembrane protein with EGF-like and two follistatin-like domains 2	1.99	10346150
Emg1|Lpcat3	1.6294097	EMG1 nucleolar protein homolog (S. cerevisiae) | lysophosphatidylcholine acyltransferase 3	1.47	10547758
Casp4	1.6253382	"caspase 4, apoptosis-related cysteine peptidase"	2.64	10582997
Oxct1	1.6251768	3-oxoacid CoA transferase 1	2.58	10422608
Commd3	1.6210402	COMM domain containing 3	not validated	10469505
Cetn2	1.6208832	centrin 2	not validated	10604974
Golga7	1.6112169	"golgi autoantigen, golgin subfamily a, 7"	not validated	10577633
Snap29	1.6099663	synaptosomal-associated protein 29	1.17	10433996
Zc3h12c	1.6086634	zinc finger CCCH type containing 12C	1.23	10593497
Id3	1.6084796	inhibitor of DNA binding 3	not validated	10509163
Alkbh8	1.6071472	"alkB, alkylation repair homolog 8 (E. coli)"	not validated	10582925
Fam175b	1.6061122	"family with sequence similarity 175, member B"		10558274
Lipa	1.6054804	lysosomal acid lipase A	1.74	10467139
Smurf2	1.6051347	SMAD specific E3 ubiquitin protein ligase 2	1.28	10392261
Gpr126	1.6034626	G protein-coupled receptor 126	2.6	10367982
Ttc9c	1.6017246	tetratricopeptide repeat domain 9C	not validated	10465812
Npr1	1.5986373	natriuretic peptide receptor 1	2.77	10499811
Reck	1.5984734	reversion-inducing-cysteine-rich protein with kazal motifs	1.65	10504424
Tmem26	1.5973085	transmembrane protein 26	2.73	10363762
Ndufa4l2	1.5968273	"NADH dehydrogenase (ubiquinone) 1 alpha subcomplex, 4-like 2"		10366951
Hspa13	1.59473	"heat shock protein 70 family, member 13"	not validated	10440388
Epha7	1.5945911	Eph receptor A7	3.93	10503659
Man1a	1.593515	"mannosidase 1, alpha"	2.08	10369154
Esm1	1.5909455	endothelial cell-specific molecule 1	not validated	10407281
Uprt	1.5886431	uracil phosphoribosyltransferase (FUR1) homolog (S. cerevisiae)	1.33	10601326
Zfp35	1.586512	zinc finger protein 35	not validated	10454306
Eif4a2	1.5839525	eukaryotic translation initiation factor 4A2	not validated	10434733
Lrrc1	1.580048	leucine rich repeat containing 1	1.85	10595109
Adam17	1.5783876	a disintegrin and metallopeptidase domain 17	not validated	10399605
Inpp4a	1.5779282	"inositol polyphosphate-4-phosphatase, type I"	1.25	10345580
Snrk	1.5767199	SNF related kinase	1.94	10590445
C130022K22Rik	1.5731187	RIKEN cDNA C130022K22 gene		10540141
Crot	1.569705	carnitine O-octanoyltransferase	not validated	10528102
Cltc	1.5693651	"clathrin, heavy polypeptide (Hc)"	not validated	10389526
Gm10808	1.5688647	predicted gene 10808		10435961
4933411K20Rik	1.5684046	RIKEN cDNA 4933411K20 gene		10571647
Fam126b	1.566724	"family with sequence similarity 126, member B"	1.3	10354868
Ints3	1.5650531	integrator complex subunit 3	2.35	10499777
Aak1	1.5640757	AP2 associated kinase 1	1.7	10539766
Cyp4b1	1.5639043	"cytochrome P450, family 4, subfamily b, polypeptide 1"	3.24	10515201
Hcfc2	1.5638018	host cell factor C2		10365242
Itfg1	1.5625914	integrin alpha FG-GAP repeat containing 1	1.39	10580391
Pcbd2	1.5620172	pterin 4 alpha carbinolamine dehydratase/dimerization cofactor of hepatocyte nuclear factor 1 alpha (TCF1) 2	1.23	10405545
Numb	1.5610411	numb gene homolog (Drosophila)	1.25	10401382
Stim2	1.5600133	stromal interaction molecule 2	not validated	10521950
Hdac9|LOC100504541	1.5597004	histone deacetylase 9 | histone deacetylase 9-like	3.71	10399973
Smchd1	1.5595864	SMC hinge domain containing 1	1.47	10452658
Ankrd44	1.5562396	ankyrin repeat domain 44	1.85	10354677
Olfml2b	1.555191	olfactomedin-like 2B	1.18	10351491
Tmem126b	1.5548514	transmembrane protein 126B	not validated	10565519
Cd151	1.5544907	CD151 antigen	not validated	10569198
Tdrd5	1.554072	tudor domain containing 5	4.17	10359118
Zfml	1.5526888	"zinc finger, matrin-like"	1.1	10539486
Rhoj	1.5517774	"ras homolog gene family, member J"	1.88	10396476
Agtpbp1	1.5501778	ATP/GTP binding protein 1	1.18	10409737
Dock11	1.5495348	dedicator of cytokinesis 11	not validated	10599120
B230118H07Rik	1.5490378	RIKEN cDNA B230118H07 gene		10485361
Ppm1d	1.5484687	"protein phosphatase 1D magnesium-dependent, delta isoform"	1.35	10379891
	1.5471683			10476299
Exoc6	1.5469143	exocyst complex component 6	1.19	10462822
B3gnt2	1.5466472	"UDP-GlcNAc:betaGal beta-1,3-N-acetylglucosaminyltransferase 2"	17.19	10384656
Sntb1	1.5437145	"syntrophin, basic 1"	2.75	10428698
Arhgap5	1.5436107	Rho GTPase activating protein 5	not validated	10395692
Slc38a4	1.5434932	"solute carrier family 38, member 4"	1.38	10431915
Megf9	1.5434304	multiple EGF-like-domains 9	1.84	10513869
Thbd	1.5427893	thrombomodulin	2.42	10488378
Alpl	1.5422432	"alkaline phosphatase, liver/bone/kidney"	1.3	10517587
4930430F08Rik|Cep290	1.5396261	RIKEN cDNA 4930430F08 gene | centrosomal protein 290		10372130
Arhgap31	1.5391515	Rho GTPase activating protein 31	1.43	10439483
Tmco1	1.5386577	transmembrane and coiled-coil domains 1	1.44	10351404
Praf2	1.5385741	PRA1 domain family 2	1.97	10598403
Narg2	1.5382622	NMDA receptor-regulated gene 2	1.6	10586724
Xiap	1.5353127	X-linked inhibitor of apoptosis	not validated	10599369
Pdia4|Mir704	1.5352224	protein disulfide isomerase associated 4 | microRNA 704	1.55	10544525
Acap2	1.5352021	"ArfGAP with coiled-coil, ankyrin repeat and PH domains 2"	not validated	10438980
Tspan15	1.5344862	tetraspanin 15	1.59	10369531
Phlpp1	1.5336027	PH domain and leucine rich repeat protein phosphatase 1	1.23	10349081
Cpt2	1.5333347	carnitine palmitoyltransferase 2	1.23	10514933
4933424B01Rik	1.532911	RIKEN cDNA 4933424B01 gene		10549341
Ptch1	1.5328183	patched homolog 1	1.82	10410039
Tfpi	1.5311655	tissue factor pathway inhibitor	not validated	10484389
Atrn	1.5310471	attractin	1.4	10476207
	1.5299586			10369929
Gmcl1	1.5297	germ cell-less homolog 1 (Drosophila)	not validated	10545940
B3galt2	1.5292027	"UDP-Gal:betaGlcNAc beta 1,3-galactosyltransferase, polypeptide 2"	1.32	10350473
Zbtb41	1.529056	zinc finger and BTB domain containing 41 homolog		10350377
Casd1	1.5287535	CAS1 domain containing 1	not validated	10536273
B230120H23Rik	1.5286322	RIKEN cDNA B230120H23 gene		10472893
Zfp148	1.5261724	zinc finger protein 148	1.13	10435237
Arhgef12|Sp140	1.5257548	Rho guanine nucleotide exchange factor (GEF) 12 | Sp140 nuclear body protein	1.4	10582862
Ptk2	1.525688	PTK2 protein tyrosine kinase 2	1.22	10429341
Prdx6	1.5253999	peroxiredoxin 6	not validated	10359422
Nr3c1	1.5247852	"nuclear receptor subfamily 3, group C, member 1"	1.23	10458569
Snupn	1.5240004	snurportin 1	1.21	10585601
Hecw2	1.5239892	"HECT, C2 and WW domain containing E3 ubiquitin protein ligase 2"	1.96	10354598
Osbpl8	1.523261	oxysterol binding protein-like 8		10366310
Ppip5k2	1.5226862	diphosphoinositol pentakisphosphate kinase 2	1.38	10356936
Map3k5	1.5212413	mitogen-activated protein kinase kinase kinase 5	1.88	10361926
Zfp84	1.5210612	zinc finger protein 84	not validated	10551760
Zeb1	1.5206915	zinc finger E-box binding homeobox 1	1.48	10453678
Cttnbp2	1.5180678	cortactin binding protein 2	1.22	10543273
Irak4	1.5153059	interleukin-1 receptor-associated kinase 4	2.26	10426451
Creb3l1	1.5151236	cAMP responsive element binding protein 3-like 1	2.43	10485117
Hmbox1	1.5140797	homeobox containing 1	1.44	10420823
Tmem184c	1.5118538	transmembrane protein 184C	1.14	10579799
P4ha1	1.510552	"procollagen-proline, 2-oxoglutarate 4-dioxygenase (proline 4-hydroxylase), alpha 1 polypeptide"	2.41	10363350
Hsd17b12	1.510306	hydroxysteroid (17-beta) dehydrogenase 12	not validated	10485294
Pam	1.5092497	peptidylglycine alpha-amidating monooxygenase	1.59	10356968
Hsdl2	1.5083394	hydroxysteroid dehydrogenase like 2	not validated	10505200
Thsd7a	1.5078651	"thrombospondin, type I, domain containing 7A"	2.89	10543145
Fam82a1	1.5077579	"family with sequence similarity 82, member A1"		10447065
4732418C07Rik	1.5073881	RIKEN cDNA 4732418C07 gene		10507190
Vamp7	1.5065323	vesicle-associated membrane protein 7		10607952
Trpc1	1.5060552	"transient receptor potential cation channel, subfamily C, member 1"	not validated	10595753
Zfp809	1.5059044	zinc finger protein 809	1.58	10583825
Zfp62	1.5053132	zinc finger protein 62	not validated	10375529
Vdac3	1.5045214	voltage-dependent anion channel 3	not validated	10407921
Ubxn2b	1.5043663	UBX domain protein 2B	not validated	10503123
Mef2c	1.502476	myocyte enhancer factor 2C	not validated	10406434
Rasa2	1.5011978	RAS p21 protein activator 2	not validated	10595805
Sash1	1.5010992	SAM and SH3 domain containing 1	1.98	10367746
Sirpa	1.5010961	signal-regulatory protein alpha	2.5	10476021
Gja4	1.5005318	"gap junction protein, alpha 4"	1.28	10516481
Ufsp1	1.5004643	UFM1-specific peptidase 1	1.55	10526564
Eftud1	1.5001568	elongation factor Tu GTP binding domain containing 1	not validated	10554629
