# Supplementary material for: Pathogenic pathways are activated in each major cell type of the glomerulus in the Cd2ap mutant mouse model of focal segmental glomerulosclerosis
Source: BMC Nephrol. 2015 May 13;16:71. doi: 10.1186/s12882-015-0063-z (PMC4430919; doi:10.1186/s12882-015-0063-z)
Supplement: Additional file 13: Table S13. — Microarray defined genes upregulated in Cd2ap wild type endothelial cells compared to Cd2ap mutants. Filtered for fold change > 1.5 and raw signal > 100. Columns show gene symbol, fold change, gene description, RNA seq validation fold change and transcript cluster ID. [file 12882_2015_63_MOESM13_ESM.xls]

Gene Symbol	FC mut vs wt endo	Gene Description	RNA-seq FC	Transcripts Cluster Id
1190002H23Rik	1.5342499	RIKEN cDNA 1190002H23 gene		10421810
9230105E10Rik	1.9150046	RIKEN cDNA 9230105E10 gene		10566346
9230105E10Rik|Trim12a|Trim5	1.5040218	RIKEN cDNA 9230105E10 gene | tripartite motif-containing 12A | tripartite motif-containing 5		10566333
Abca1	1.9595301	"ATP-binding cassette, sub-family A (ABC1), member 1"	4	10512949
Abcg2	1.7023573	"ATP-binding cassette, sub-family G (WHITE), member 2"	2.46	10538640
Acadsb	1.5916328	"acyl-Coenzyme A dehydrogenase, short/branched chain"	1.44	10558227
Ace	2.261805	angiotensin I converting enzyme (peptidyl-dipeptidase A) 1	3.59	10381962
Acer2	2.0785804	alkaline ceramidase 2	2.56	10505779
Acp1	1.9559717	"acid phosphatase 1, soluble"	1.51	10399820
Actn1	1.5307647	"actinin, alpha 1"	2.37	10401244
Ada	2.3045433	adenosine deaminase	3.5	10489391
Adar	1.5581679	"adenosine deaminase, RNA-specific"	1.84	10493565
AI452195	2.1190279			10407124
AI607873	2.4609694			10360377
Amigo2|Fam113b	2.272258	"adhesion molecule with Ig like domain 2 | family with sequence similarity 113, member B"	3.66	10431935
Apol9b|Apol9a	1.6919279	apolipoprotein L 9b | apolipoprotein L 9a	21.8	10425049
Arhgdib	1.6421237	"Rho, GDP dissociation inhibitor (GDI) beta"	2.61	10548892
Armcx4	1.5107745	"armadillo repeat containing, X-linked 4"	1.6	10601768
Atp2b4	1.5639956	"ATPase, Ca++ transporting, plasma membrane 4"	1.3	10357833
Bcl2l1	1.807357	BCL2-like 1	3.68	10488655
Bgn	3.9534812	biglycan	8.96	10600169
Bmp4	2.2961264	bone morphogenetic protein 4	5.41	10419261
Bmper	1.632831	BMP-binding endothelial regulator	2.14	10583870
Bst2	2.4585273	bone marrow stromal cell antigen 2	3.49	10579532
C1qtnf1	1.6598461	C1q and tumor necrosis factor related protein 1	3.7	10383025
C920016K16Rik	1.630903	RIKEN cDNA C920016K16 gene		10443918
Car8	1.7691699	carbonic anhydrase 8	2.17	10511429
Cd274	1.5758026	CD274 antigen	2.9	10462390
Cd63	2.2460093	CD63 antigen	4.52	10367436
Cd93	2.1102448	CD93 antigen	4.78	10488382
Cdc42ep1	1.5234139	CDC42 effector protein (Rho GTPase binding) 1	1.37	10425116
Cdc42ep3	1.6688669	CDC42 effector protein (Rho GTPase binding) 3	2.05	10453049
Cdc42ep4	1.6096644	CDC42 effector protein (Rho GTPase binding) 4	2.99	10392735
Cdkn1a	2.087272	cyclin-dependent kinase inhibitor 1A (P21)	2.42	10443463
Cebpd	1.5512829	"CCAAT/enhancer binding protein (C/EBP), delta"	1.71	10433885
Cfb	2.4137125	complement factor B	2.61	10450325
Ch25h	2.2643626	cholesterol 25-hydroxylase	8.06	10467136
Chd7	1.7956736	chromodomain helicase DNA binding protein 7	1.36	10503194
Chn2|9130019P16Rik	1.7264968	chimerin (chimaerin) 2 | RIKEN cDNA 9130019P16 gene	3.21	10538356
Cirbp	1.7062505	cold inducible RNA binding protein	2.02	10364712
Clca1	2.7226353	chloride channel calcium activated 1	4.02	10502552
Clec14a	1.7307031	"C-type lectin domain family 14, member a"	2.45	10400510
Col4a1	1.5551004	"collagen, type IV, alpha 1"	2.55	10576973
Col4a2	1.6317317	"collagen, type IV, alpha 2"	2.69	10570068
Cpt1a	1.7936246	"carnitine palmitoyltransferase 1a, liver"	1.89	10460157
Crim1	2.0499163	cysteine rich transmembrane BMP regulator 1 (chordin like)	2.65	10446986
Csprs|Gm2619|Gm7592	1.6125826	component of Sp100-rs | predicted gene 2619 | predicted gene 7592	2.44	10356262
Csrnp1	1.6160225	cysteine-serine-rich nuclear protein 1	1.96	10597758
Cyr61	2.0250943	cysteine rich protein 61	6.44	10502655
Cyth1	1.5510238	cytohesin 1	1.57	10393544
D14Ertd668e	1.7863449	"DNA segment, Chr 14, ERATO Doi 668, expressed"	3.19	10420488
Daxx	1.7058942	Fas death domain-associated protein	2.35	10444056
Ddah1	2.6439843	dimethylarginine dimethylaminohydrolase 1	4.1	10496727
Ddx58	1.6799184	DEAD (Asp-Glu-Ala-Asp) box polypeptide 58	1.92	10512067
Ddx60	2.141061	DEAD (Asp-Glu-Ala-Asp) box polypeptide 60	2.35	10571984
Dhrs3	1.7386163	dehydrogenase/reductase (SDR family) member 3	1.79	10510129
Dtx3l|Parp9	1.713758	"deltex 3-like (Drosophila) | poly (ADP-ribose) polymerase family, member 9"	2.41	10439268
Dusp6	1.5154138	dual specificity phosphatase 6	1.62	10366043
Edn1	3.3638537	endothelin 1	7.75	10404783
Ehd4	1.7535697	EH-domain containing 4	2.14	10486396
Eif2ak2	1.7688781	eukaryotic translation initiation factor 2-alpha kinase 2	1.64	10452980
Elf4	1.5722537	E74-like factor 4 (ets domain transcription factor)	1.7	10604393
Entpd1	2.4232206	ectonucleoside triphosphate diphosphohydrolase 1	3.35	10463070
Erap1	1.6140419	endoplasmic reticulum aminopeptidase 1	1.39	10406205
Fam107a	2.336708	"family with sequence similarity 107, member A"	12.58	10417561
Fam167b	1.5963095	"family with sequence similarity 167, member B"	1.62	10516637
Fkbp14	1.5138396	FK506 binding protein 14	1.78	10544885
Flrt2	1.9746948	fibronectin leucine rich transmembrane protein 2	2.27	10397633
Fmnl2	1.505312	formin-like 2	1.93	10472097
Fn1	1.86356	fibronectin 1	8.1	10355403
Foxc2	1.5073304	forkhead box C2	1.94	10576051
Fstl1	1.7020583	follistatin-like 1	1.77	10435641
Galnt1	1.5629495	UDP-N-acetyl-alpha-D-galactosamine:polypeptide N-acetylgalactosaminyltransferase 1	1.66	10454310
Gas6	1.5927066	growth arrest specific 6	1.89	10577164
Gbp2	2.5667489	guanylate binding protein 2	4.19	10496592
Gbp3	3.695949	guanylate binding protein 3	6.13	10496580
Gbp4	2.8263288	guanylate binding protein 4	3.02	10531987
Gbp5	2.6706758	guanylate binding protein 5	4.49	10496539
Gbp6	2.7766173	guanylate binding protein 6	3.66	10496569
Gbp9	1.847077	guanylate-binding protein 9	2.57	10531980
Gcnt1	1.6339595	"glucosaminyl (N-acetyl) transferase 1, core 2"	1.89	10466521
Gda	2.4589636	guanine deaminase	3.6	10466659
Gem	1.7259719	GTP binding protein (gene overexpressed in skeletal muscle)	2	10503334
Gm12250	4.2860203	predicted gene 12250	13.81	10376324
Gm4951	2.503259	predicted gene 4951	2.36	10455954
Gm8979|Gm8989|Gvin1	1.5889114	"very large inducible GTPase 1 pseudogene | GTPase, very large interferon inducible 1"	not vlidated	10566571
Got1	1.5325848	"glutamate oxaloacetate transaminase 1, soluble"	1.39	10467842
Gpihbp1	2.1013684	GPI-anchored HDL-binding protein 1	4.88	10424695
Gpr56	1.5178211	G protein-coupled receptor 56	2.02	10574259
Gprc5b	1.6670667	"G protein-coupled receptor, family C, group 5, member B"	2.43	10567355
H2-Aa	2.6578	"histocompatibility 2, class II antigen A, alpha"	4.6	10450154
H2-Ab1	4.788631	"histocompatibility 2, class II antigen A, beta 1"	7.95	10444291
H2-gs10|H2-Q5	2.2625153	"MHC class I like protein GS10 | histocompatibility 2, Q region locus 5"	5.07	10444814
H2-Q6|LOC68395	3.4448109	"histocompatibility 2, Q region locus 6 | histocompatibility 2, Q region locus 6-like"	23.6	10444824
H2-Q7|H2-Q6|H2-Q8	1.8526479	"histocompatibility 2, Q region locus 7 | histocompatibility 2, Q region locus 6 | histocompatibility 2, Q region locus 8"	3.15	10444830
H2-T22|H2-T9|H2-T10	4.2713284	"histocompatibility 2, T region locus 22 | histocompatibility 2, T region locus 9 | histocompatibility 2, T region locus 10"	7.15	10450694
H2-T23|C920025E04Rik	2.0136492	"histocompatibility 2, T region locus 23 | RIKEN cDNA C920025E04 gene"	6.28	10450682
H2-T24	1.9249573	"histocompatibility 2, T region locus 24"	1.71	10450675
Herc6	2.2334492	hect domain and RLD 6	1.9	10538590
Hist1h1c	1.6491965	"histone cluster 1, H1c"	1.84	10404059
Hmcn1	2.4003148	hemicentin 1	2.48	10358559
I830012O16Rik	7.4157424	RIKEN cDNA I830012O16 gene	9.29	10462621
Ier3	1.7679551	immediate early response 3	3.34	10444890
Ifi204|Mnda	2.950452	interferon activated gene 204 | myeloid cell nuclear differentiation antigen	6.08	10360382
Ifi27l2a	2.4678323	"interferon, alpha-inducible protein 27 like 2A"	3.34	10402347
Ifi35	1.5762471	interferon-induced protein 35	1.75	10381408
Ifi44	1.7071042	interferon-induced protein 44	2.26	10502791
Ifi47|Olfr56	3.0393908	interferon gamma inducible protein 47 | olfactory receptor 56	not validated	10375515
Ifih1	1.940929	interferon induced with helicase C domain 1	1.87	10483110
Ifit1	4.5196104	interferon-induced protein with tetratricopeptide repeats 1	8.38	10462623
Ifit2	3.4646184	interferon-induced protein with tetratricopeptide repeats 2	4.98	10462613
Ifit3	5.6777606	interferon-induced protein with tetratricopeptide repeats 3	12.19	10462618
Iigp1	3.5720892	interferon inducible GTPase 1	4.48	10455961
Il4ra	1.5832902	"interleukin 4 receptor, alpha"	1.76	10557326
Inpp5d	1.594046	inositol polyphosphate-5-phosphatase D	2.19	10348244
Irf1	1.5376084	interferon regulatory factor 1	1.62	10376060
Irf7	5.842754	interferon regulatory factor 7	14.8	10569102
Irf9	1.7278776	interferon regulatory factor 9	1.95	10415319
Irgm1	2.6182315	immunity-related GTPase family M member 1	3.47	10385500
Irgm2|Igtp	3.5703583	immunity-related GTPase family M member 2 | interferon gamma induced GTPase	1.99	10376326
Isg15	3.3028326	ISG15 ubiquitin-like modifier	6.58	10451287
Isg20	1.6280243	interferon-stimulated protein	2.94	10554240
Itga1	2.5767152	integrin alpha 1	3.32	10412298
Itgb3	1.569024	integrin beta 3	4.35	10381809
Klhl6	2.5015717	kelch-like 6 (Drosophila)	2.6	10438445
Lasp1	1.5940123	LIM and SH3 protein 1	1.56	10380823
Lgals3bp	1.7767678	"lectin, galactoside-binding, soluble, 3 binding protein"	2.26	10393573
Lrg1	1.9532851	leucine-rich alpha-2-glycoprotein 1	3.75	10451953
Ly6a	1.7060306	"lymphocyte antigen 6 complex, locus A"	5.48	10429564
Ly6c2|Ly6c1	1.5084097	"lymphocyte antigen 6 complex, locus C2 | lymphocyte antigen 6 complex, locus C1"	16.03	10429573
Man1c1	2.0897038	"mannosidase, alpha, class 1C, member 1"	2.33	10517287
Mgp	2.4380379	matrix Gla protein	9.94	10548879
Mid2	1.5542059	midline 2	1.92	10602068
Mkl2	1.7659804	MKL/myocardin-like 2	2.3	10433656
Mpa2l|Gbp10|Gbp11|Gbp8	3.1231902	macrophage activation 2 like | guanylate-binding protein 10 | guanylate binding protein 11 | guanylate-binding protein 8	3.66	10531994
Mx2	2.7797651	myxovirus (influenza virus) resistance 2	2.61	10437224
Nfix	1.522752	nuclear factor I/X	1.66	10580191
Nlrc5	1.9858912	"NLR family, CARD domain containing 5"	2.56	10574149
Nr2f2	1.8050488	"nuclear receptor subfamily 2, group F, member 2"	3.96	10564527
Nt5c2	1.5360327	"5'-nucleotidase, cytosolic II"	1.35	10463729
Nt5c3	1.6185108	"5'-nucleotidase, cytosolic III"	not validated	10544982
Nucb2	1.5136417	nucleobindin 2	1.89	10556583
Oas1a	2.280441	2'-5' oligoadenylate synthetase 1A	2.73	10533256
Oas1b	1.8541532	2'-5' oligoadenylate synthetase 1B	1.76	10525158
Oas1g|Oas1a	2.2608104	2'-5' oligoadenylate synthetase 1G | 2'-5' oligoadenylate synthetase 1A	2.54	10533246
Oasl2	2.8152573	2'-5' oligoadenylate synthetase-like 2	4.43	10524621
Ogfr	1.6480519	opioid growth factor receptor	1.79	10479411
Osmr	1.5417866	oncostatin M receptor	1.6	10427471
Parp12	1.7702627	"poly (ADP-ribose) polymerase family, member 12"	1.93	10544133
Parp14	1.8061025	"poly (ADP-ribose) polymerase family, member 14"	2.07	10439249
Parp9|Dtx3l	2.1746445	"poly (ADP-ribose) polymerase family, member 9 | deltex 3-like (Drosophila)"	2.86	10435457
Pde4d	1.5051038	"phosphodiesterase 4D, cAMP specific"	2	10407097
Pde7b	1.5313033	phosphodiesterase 7B	1.36	10368175
Pdgfb	1.6361376	"platelet derived growth factor, B polypeptide"	2.1	10430660
Pfkfb3	1.9158202	"6-phosphofructo-2-kinase/fructose-2,6-biphosphatase 3"	3.11	10480035
Phf6	1.5382593	PHD finger protein 6	1.34	10599612
Plin2	1.931363	perilipin 2	2.92	10514221
Plvap	2.1778579	plasmalemma vesicle associated protein	19.87	10579525
Ppfibp1	1.6652361	"PTPRF interacting protein, binding protein 1 (liprin beta 1)"	1.91	10542791
Prss23	2.9965107	"protease, serine, 23"	35.33	10554814
Psmb8	2.583962	"proteasome (prosome, macropain) subunit, beta type 8 (large multifunctional peptidase 7)"	3.74	10444258
Psmb9	1.9313943	"proteasome (prosome, macropain) subunit, beta type 9 (large multifunctional peptidase 2)"	2.39	10450145
Rai14	1.6754755	retinoic acid induced 14	2.24	10427744
Ramp3	1.5610404	receptor (calcitonin) activity modifying protein 3	1.63	10374197
Rarb	1.6138872	"retinoic acid receptor, beta"	1.7	10417713
Rnf144b	1.901925	ring finger protein 144B	2.05	10404965
Rnf213	3.0996819	ring finger protein 213	2.62	10383200
Rsad2	3.4736004	radical S-adenosyl methionine domain containing 2	6.58	10399710
Rtp4	2.576247	receptor transporter protein 4	3.23	10434778
S100a6	1.6183149	S100 calcium binding protein A6 (calcyclin)	2.72	10493820
Samd9l	1.6168941	sterile alpha motif domain containing 9-like	1.74	10542911
Sema7a	1.9260439	"sema domain, immunoglobulin domain (Ig), and GPI membrane anchor, (semaphorin) 7A"	2.87	10585778
Serpine1	2.4000278	"serine (or cysteine) peptidase inhibitor, clade E, member 1"	8.99	10534667
Serpine2	2.2554088	"serine (or cysteine) peptidase inhibitor, clade E, member 2"	4.27	10355984
Setdb2	1.7894801	"SET domain, bifurcated 2"	1.3	10420503
Sft2d2	1.6352679	SFT2 domain containing 2	1.27	10359713
Slc3a2	1.6260685	"solute carrier family 3 (activators of dibasic and neutral amino acid transport), member 2"	2.03	10465772
Slc6a6	1.5666037	"solute carrier family 6 (neurotransmitter transporter, taurine), member 6"	2.11	10540122
Slco2a1	1.5064609	"solute carrier organic anion transporter family, member 2a1"	1.84	10588263
Slfn2	2.0596032	schlafen 2	2.18	10379630
Slfn3	1.7112325	schlafen 3	2.13	10379646
Spats2l	1.7201539	"spermatogenesis associated, serine-rich 2-like"	2.44	10346348
Stat1	1.8726823	signal transducer and activator of transcription 1	2.25	10346191
Stat2	2.234536	signal transducer and activator of transcription 2	2	10367224
Stom	2.14583	stomatin	2.24	10482030
Sulf2	1.5819744	sulfatase 2	2.03	10489759
Tap1	2.1314967	"transporter 1, ATP-binding cassette, sub-family B (MDR/TAP)"	3.25	10444244
Tap2	1.5369589	"transporter 2, ATP-binding cassette, sub-family B (MDR/TAP)"	1.98	10444268
Tapbp	1.566401	TAP binding protein	1.98	10444068
Tgm2	1.6900623	"transglutaminase 2, C polypeptide"	4.23	10489204
Tgtp1|Tgtp2|Gm12185	3.3223217	T-cell specific GTPase 1 | T-cell specific GTPase 2 | predicted gene 12185	19.81	10385518
Thrsp	1.6831586	thyroid hormone responsive SPOT14 homolog (Rattus)	2.4	10565609
Tinagl1	1.6641719	tubulointerstitial nephritis antigen-like 1	2.69	10516735
Tm6sf1|Hdgfrp3	1.6229938	"transmembrane 6 superfamily member 1 | hepatoma-derived growth factor, related protein 3"	2.4	10554574
Tmem71	1.5203952	transmembrane protein 71	1.28	10429114
Tmtc1	1.5473156	transmembrane and tetratricopeptide repeat containing 1	2.46	10549420
Tnfrsf10b	1.5376292	"tumor necrosis factor receptor superfamily, member 10b"	not validated	10416230
Tor1aip1	1.5992988	torsin A interacting protein 1	1.72	10359097
Tor3a	1.5652188	"torsin family 3, member A"	1.53	10359181
Trafd1	1.8776199	TRAF type zinc finger domain containing 1	2.45	10533304
Trim21	1.7732031	tripartite motif-containing 21	1.56	10566144
Ttc30b	2.1263177	tetratricopeptide repeat domain 30B	2.79	10483819
Ttc39b	1.5552955	tetratricopeptide repeat domain 39B	1.49	10514128
Ube2l6	1.6322346	ubiquitin-conjugating enzyme E2L 6	2.8	10473356
Ubr7	1.5502348	ubiquitin protein ligase E3 component n-recognin 7 (putative)	1.44	10397895
Uchl1	2.0400884	ubiquitin carboxy-terminal hydrolase L1	2.38	10522208
Ucp2	1.5889488	"uncoupling protein 2 (mitochondrial, proton carrier)"	2.66	10555389
Usp18	2.666345	ubiquitin specific peptidase 18	3.13	10541307
Vcl	1.6377009	vinculin	1.69	10413059
Vim	1.6152041	vimentin	3.69	10469322
Wars	1.9911609	tryptophanyl-tRNA synthetase	1.65	10402585
Xaf1	2.2489195	XIAP associated factor 1	2.53	10378068
Xdh	2.388897	xanthine dehydrogenase	4.75	10452815
Zbp1	3.7869568	Z-DNA binding protein 1	23.13	10490150
Zcchc2	1.5781142	"zinc finger, CCHC domain containing 2"	1.52	10349065
Zfp69	1.6128199	zinc finger protein 69	not validated	10515986
Znfx1	1.9962586	"zinc finger, NFX1-type containing 1"	2.62	10489850
