# Supplementary material for: Pathogenic pathways are activated in each major cell type of the glomerulus in the Cd2ap mutant mouse model of focal segmental glomerulosclerosis
Source: BMC Nephrol. 2015 May 13;16:71. doi: 10.1186/s12882-015-0063-z (PMC4430919; doi:10.1186/s12882-015-0063-z)
Supplement: Additional file 15: Table S15. — RNA-seq defined genes higher in wild type endothelial cells compared to Cd2ap mutant. Fold change > 2.0. Columns show gene symbol, fold change, Gene ID, RPKM in mutant, RPKM in wild type and gene position as determined by chromosome, start and end, gene description. [file 12882_2015_63_MOESM15_ESM.xls]

Gene Symbol	Fold Change	Gene ID	Mut RPKM	WT RPKM	Chromosome	Start	End	Description
Ddx3y	1565.2526	26900	15.830184	0	chrY	597158	623056	"DEAD (Asp-Glu-Ala-Asp) box polypeptide 3, Y-linked"
Eif2s3y	743.06323	26908	19.818777	0	chrY	347055	365037	"eukaryotic translation initiation factor 2, subunit 3, structural gene Y-linked"
1190002H23Rik	343.47626	66214	42.352413	0.1305457	chr14	79688557	79701442	RIKEN cDNA 1190002H23 gene
Kdm5d	183.83028	20592	4.543388	0.026166402	chrY	234231	293224	lysine (K)-specific demethylase 5D
Inhbb	101.00816	16324	3.3442185	0.03505252	chr1	121312042	121318825	inhibin beta-B
Mt2	70.253685	17750	5.9550014	0	chr8	96696518	96697467	metallothionein 2
Zbtb16	60.968987	235320	18.835707	0.32708	chr9	48462402	48644327	zinc finger and BTB domain containing 16
Prss23	35.331623	76453	6.3756056	0.19104643	chr7	96656295	96675685	"protease, serine, 23"
Olr1	32.664047	108078	3.0092595	0.09753731	chr6	129435266	129457183	oxidized low density lipoprotein (lectin-like) receptor 1
Apol9a	27.48816	223672	4.923622	0.18963571	chr15	77234219	77241510	apolipoprotein L 9a
Slc10a6	25.533598	75750	11.854771	0.49154398	chr5	104034730	104058422	"solute carrier family 10 (sodium/bile acid cotransporter family), member 6"
H2-Q6	23.602009	110557	150.24757	6.7396836	chr17	35561822	35579496	"histocompatibility 2, Q region locus 6"
Zbp1	23.135399	58203	15.37362	0.7035262	chr2	173032114	173044423	Z-DNA binding protein 1
Chi3l3	22.879953	12655	8.377493	0.38765037	chr3	105950472	105970482	chitinase 3-like 3
Apol9b	21.797138	71898	3.8504052	0.18702003	chr15	77559502	77566812	apolipoprotein L 9b
Plvap	19.867006	84094	53.6805	2.860652	chr8	74021652	74035668	plasmalemma vesicle associated protein
Tgtp1	19.810747	21822	3.0100775	0.16086367	chr11	48798831	48805756	T cell specific GTPase 1
Nr1d1	19.518055	217166	129.44023	7.021241	chr11	98629249	98636556	"nuclear receptor subfamily 1, group D, member 1"
Dbp	19.495625	13170	10.379562	0.5636673	chr7	52960617	52965573	D site albumin promoter binding protein
Fkbp5	16.959969	14229	32.902542	2.053929	chr17	28536040	28654469	FK506 binding protein 5
Apln	16.518454	30878	46.817112	3.0006576	chrX	45378323	45388029	apelin
Ly6c2	16.038116	100041546	7.521896	0.49654093	chr15	74938591	74942379	"lymphocyte antigen 6 complex, locus C2"
Kcnb1	15.463236	16500.chr2.2	3.0829875	0.21108261	chr2	166928883	167015604	"potassium voltage gated channel, Shab-related subfamily, member 1"
Irf7	14.781436	54123	259.41495	18.580597	chr7	148449088	148452300	interferon regulatory factor 7
Cyp26b1	14.254461	232174	87.88568	6.5275235	chr6	84521408	84543902	"cytochrome P450, family 26, subfamily b, polypeptide 1"
E030010A14Rik	14.141976	226040	6.5408463	0.48967174	chr19	24748498	24754151	RIKEN cDNA E030010A14 gene
Gm12250	13.814785	631323	15.797969	1.2107044	chr11	57997345	58003700	predicted gene 12250
Fam107a	12.583205	268709	42.539326	3.5791528	chr14	9128792	9150079	"family with sequence similarity 107, member A"
Plau	12.51405	18792	7.3306584	0.6201923	chr14	21655884	21662610	"plasminogen activator, urokinase"
Ifit3	12.188458	15959	96.25187	8.360676	chr19	34658019	34663472	interferon-induced protein with tetratricopeptide repeats 3
Serpina3n	12.048556	20716	7.793452	0.6848193	chr12	105644918	105652539	"serine (or cysteine) peptidase inhibitor, clade A, member 3N"
H2-Q9	9.979832	110558	265.20148	28.134161	chr17	35576100	35580718	"histocompatibility 2, Q region locus 9"
Shroom3	9.971886	27428	4.1243467	0.4378839	chr5	93112461	93394785	shroom family member 3
Mgp	9.943055	17313	45.210323	4.8139186	chr6	136820956	136824326	matrix Gla protein
H2-DMa	9.676959	14998	3.6963007	0.40439853	chr17	34259777	34276028	"histocompatibility 2, class II, locus DMa"
Galntl2	9.601409	78754	11.066637	1.2202865	chr14	32842289	32871512	UDP-N-acetyl-alpha-D-galactosamine:polypeptide N-acetylgalactosaminyltransferase-like 2
Oas2	9.488409	246728	11.901744	1.3280007	chr5	121180342	121199857	2'-5' oligoadenylate synthetase 2
I830012O16Rik	9.292528	667370	38.849487	4.4262147	chr19	34682423	34687891	RIKEN cDNA I830012O16 gene
Serpine1	8.99033	18787	73.663895	8.674816	chr5	137537376	137548142	"serine (or cysteine) peptidase inhibitor, clade E, member 1"
Bgn	8.96125	12111	114.07182	13.476921	chrX	70728974	70741275	biglycan
Gbp8	8.919323	76074	3.8696504	0.45932585	chr5	105443172	105482580	guanylate-binding protein 8
Oit3	8.490925	18302	25.690926	3.2033608	chr10	58885708	58904527	oncoprotein induced transcript 3
Ifit1	8.379184	15957	58.955753	7.4491324	chr19	34715379	34724499	interferon-induced protein with tetratricopeptide repeats 1
Fn1	8.100602	14268	10.941598	1.4300282	chr1	71632097	71699745	fibronectin 1
Ch25h	8.059462	12642	12.31682	1.6179817	chr19	34548274	34549625	cholesterol 25-hydroxylase
H2-Ab1	7.9501734	14961	38.272556	5.0967355	chr17	34400172	34406363	"histocompatibility 2, class II antigen A, beta 1"
Mt1	7.7800875	17748	12.097453	1.6462306	chr8	96702989	96704227	metallothionein 1
Edn1	7.751315	13614	67.64911	9.23991	chr13	42396639	42403358	endothelin 1
Fblim1	7.6148033	74202	14.921811	2.0746453	chr4	141131977	141161967	filamin binding LIM protein 1
Irx3	7.3778534	16373	5.0235105	0.7208722	chr8	94322424	94325273	Iroquois related homeobox 3 (Drosophila)
H2-Eb1	7.293595	14969	4.638462	0.6733073	chr17	34442812	34453619	"histocompatibility 2, class II antigen E beta"
H2-T22	7.149652	15039	38.153515	5.649769	chr17	36175354	36179647	"histocompatibility 2, T region locus 22"
Ifi202b	6.8356724	26388	8.986422	1.391831	chr1	175892700	175912975	interferon activated gene 202B
Hist1h4a	6.6785088	326619	6.091356	0.96564084	chr13	23852715	23853026	"histone cluster 1, H4a"
Isg15	6.580148	100038882	100.95489	16.243242	chr4	155573533	155574927	ISG15 ubiquitin-like modifier
Rsad2	6.5770283	58185	187.63664	30.204323	chr12	27127608	27141317	radical S-adenosyl methionine domain containing 2
Cyr61	6.436313	16007	89.85265	14.780018	chr3	145309935	145312949	cysteine rich protein 61
H2-T23	6.2796383	15040	246.2562	41.517727	chr17	36166922	36169646	"histocompatibility 2, T region locus 23"
Gbp3	6.133383	55932	27.172201	4.690355	chr3	142223016	142236176	guanylate binding protein 3
Mnda	6.080379	381308	3.3384082	0.581286	chr1	175826486	175843258	myeloid cell nuclear differentiation antigen
Fbln2	5.982603	14115	20.446486	3.6183407	chr6	91162758	91222534	fibulin 2
Mir24-2	5.774019	723960	3.598316	0.65978456	chr8	86732714	86732820	microRNA 24-2
Lgals1	5.7287974	16852	5.380344	0.99432325	chr15	78757155	78760895	"lectin, galactose binding, soluble 1"
AI607873	5.719204	226691	11.195741	2.0725179	chr1	175653815	175671878	expressed sequence AI607873
Mgl2	5.6809535	216864	3.916184	0.72983205	chr11	69943859	69951050	macrophage galactose N-acetyl-galactosamine specific lectin 2
5430416O09Rik	5.501133	71406	4.7265	0.9096378	chr4	43742906	43747406	RIKEN cDNA 5430416O09 gene
Ly6a	5.4831924	110454	2500.7522	482.85675	chr15	74825307	74828331	"lymphocyte antigen 6 complex, locus A"
Aldh1a2	5.4812355	19378	3.4334087	0.6631749	chr9	71063596	71144050	"aldehyde dehydrogenase family 1, subfamily A2"
Bmp4	5.4124193	12159	38.257954	7.4836164	chr14	47003196	47010274	bone morphogenetic protein 4
Oasl1	5.354048	231655	7.1949587	1.4227445	chr5	115373249	115387920	2'-5' oligoadenylate synthetase-like 1
Cxcl12	5.2911544	20315	5.298943	1.0602782	chr6	117118553	117131386	chemokine (C-X-C motif) ligand 12
H2-Q4	5.072544	15015	105.941414	22.111633	chr17	35516562	35521619	"histocompatibility 2, Q region locus 4"
Myc	5.0269265	17869	5.511827	1.1608443	chr15	61816896	61821916	myelocytomatosis oncogene
Kcnb1	5.0036235	16500.chr2.1	3.5347517	0.7479202	chr2	166924294	166927030	"potassium voltage gated channel, Shab-related subfamily, member 1"
Ifit2	4.983386	15958	48.09097	10.2169285	chr19	34625184	34651024	interferon-induced protein with tetratricopeptide repeats 2
Gpihbp1	4.8779984	68453	443.4831	96.2535	chr15	75427088	75428643	GPI-anchored HDL-binding protein 1
Tef	4.850442	21685	7.2297535	1.578059	chr15	81633103	81657293	thyrotroph embryonic factor
Vcam1	4.7967834	22329	6.6796074	1.4742864	chr3	115812938	115832606	vascular cell adhesion molecule 1
Cd93	4.779715	17064	191.6233	42.445076	chr2	148262387	148269271	CD93 antigen
Xdh	4.75476	22436	23.10717	5.1451645	chr17	74233248	74299522	xanthine dehydrogenase
Kcnk5	4.6854296	16529	10.2515545	2.316442	chr14	20959280	21001004	"potassium channel, subfamily K, member 5"
H2-Aa	4.60369	14960	8.475802	1.9491969	chr17	34419696	34424716	"histocompatibility 2, class II antigen A, alpha"
Prcp	4.587121	72461	28.358763	6.545282	chr7	100023763	100083091	prolylcarboxypeptidase (angiotensinase C)
Cd63	4.515888	12512	12.317162	2.8876762	chr10	128345975	128349874	CD63 antigen
Gbp5	4.491375	229898	7.7069	1.8166921	chr3	142159898	142185308	guanylate binding protein 5
Iigp1	4.475475	60440	47.55249	11.249039	chr18	60535683	60552283	interferon inducible GTPase 1
Oasl2	4.4288015	23962	122.08881	29.185736	chr5	115346943	115362254	2'-5' oligoadenylate synthetase-like 2
Itgb3	4.3493104	16416	45.327858	11.033818	chr11	104469314	104531785	integrin beta 3
Sparcl1	4.2982893	13602	68.86476	16.96221	chr5	104508128	104543107	SPARC-like 1
Serpine2	4.2724404	20720	40.625767	10.067151	chr1	79790896	79855240	"serine (or cysteine) peptidase inhibitor, clade E, member 2"
Ak1	4.2430415	11636	5.710367	1.4248463	chr2	32477278	32490578	adenylate kinase 1
Igtp	4.239314	16145	79.34399	19.81524	chr11	58013058	58036285	interferon gamma induced GTPase
Tgm2	4.230345	21817	35.324696	8.840638	chr2	157942141	157972128	"transglutaminase 2, C polypeptide"
Per1	4.211929	18626	26.77163	6.7293763	chr11	68908756	68923459	period homolog 1 (Drosophila)
Ctgf	4.1990824	14219	31.725077	7.9988794	chr10	24315248	24318488	connective tissue growth factor
Gbp2	4.1900125	14469	28.195263	7.1242957	chr3	142283627	142300972	guanylate binding protein 2
Kcnd3	4.185138	56543	3.4279463	0.8671724	chr3	105255248	105476920	"potassium voltage-gated channel, Shal-related family, member 3"
Ddah1	4.103372	69219	6.6903806	1.7262005	chr3	145421656	145557241	dimethylarginine dimethylaminohydrolase 1
Cd14	4.073495	12475	17.953045	4.6660795	chr18	36884721	36886308	CD14 antigen
Ddit4	4.066774	74747	17.428757	4.5373	chr10	59412423	59414518	DNA-damage-inducible transcript 4
Nr1d2	4.040319	353187	21.855732	5.727047	chr14	19036570	19071620	"nuclear receptor subfamily 1, group D, member 2"
Clca1	4.0191326	12722	8.671478	2.2842407	chr3	144393280	144482458	chloride channel calcium activated 1
Abca1	4.015217	11303	16.680943	4.398378	chr4	53043661	53172767	"ATP-binding cassette, sub-family A (ABC1), member 1"
Nr2f2	3.9643896	11819	11.541328	3.0821977	chr7	77496836	77511632	"nuclear receptor subfamily 2, group F, member 2"
Cdh13	3.939288	12554	3.717114	0.9990085	chr8	120807655	121847348	cadherin 13
Trp53i11	3.8654692	277414	20.465246	5.605261	chr2	93027741	93041914	transformation related protein 53 inducible protein 11
Gadd45g	3.8483465	23882	83.96488	23.0996	chr13	51942044	51943843	growth arrest and DNA-damage-inducible 45 gamma
9030425E11Rik	3.8229067	71566	4.1432085	1.1474243	chr9	40494047	40592129	RIKEN cDNA 9030425E11 gene
AW112010	3.8191104	107350	4.396738	1.2188478	chr19	11122102	11125056	expressed sequence AW112010
Gm3593	3.8047159	100041962	204.00948	56.76875	chr13	62184507	62397530	predicted gene 3593
Hrct1	3.7588372	100039781	26.679533	7.5146003	chr4	43740070	43740982	histidine rich carboxyl terminus 1
Olfr56	3.7570002	18356	34.419155	9.69929	chr11	48864235	48948889	olfactory receptor 56
Lrg1	3.7489424	76905	37.020336	10.454724	chr17	56259101	56261369	leucine-rich alpha-2-glycoprotein 1
Psmb8	3.7373648	16913	159.28062	45.120983	chr17	34335140	34338399	"proteasome (prosome, macropain) subunit, beta type 8 (large multifunctional peptidase 7)"
Igf2	3.727545	16002	19.34885	5.4955783	chr7	149836673	149846940	insulin-like growth factor 2
Pafah1b3	3.7124772	18476	4.7622747	1.3580999	chr7	26080068	26082974	"platelet-activating factor acetylhydrolase, isoform 1b, subunit 3"
C1qtnf1	3.699245	56745	15.476085	4.4292374	chr11	118289771	118313096	C1q and tumor necrosis factor related protein 1
Serpina3f	3.6963606	238393	44.216946	12.664715	chr12	105452754	105480144	"serine (or cysteine) peptidase inhibitor, clade A, member 3F"
Vim	3.6946385	22352	113.56681	32.543213	chr2	13495938	13504453	vimentin
Pydc4	3.686957	623121	6.847871	1.9663854	chr1	175522088	175529405	pyrin domain containing 4
Bcl2l1	3.6779733	12048	48.06224	13.834919	chr2	152606404	152657418	BCL2-like 1
4930578C19Rik	3.6751347	75905	4.133341	1.1907184	chrX	17992007	18038400	RIKEN cDNA 4930578C19 gene
Amigo2	3.661405	105827	18.604033	5.379481	chr15	97074505	97077718	adhesion molecule with Ig like domain 2
Il33	3.6574779	77125	4.156852	1.2032725	chr19	29999604	30035205	interleukin 33
Gbp6	3.656819	100702	3.1813483	0.9210621	chr5	105699721	105722718	guanylate binding protein 6
Cxcl10	3.6413138	15945	6.6481338	1.9329591	chr5	92775667	92777880	chemokine (C-X-C motif) ligand 10
Rasd1	3.6375186	19416	3.1427453	0.91471344	chr11	59776685	59778444	"RAS, dexamethasone-induced 1"
Esm1	3.6297061	71690	31.78101	9.269947	chr13	113999867	114008312	endothelial cell-specific molecule 1
4930481A15Rik	3.6111395	74931	8.265315	2.4232383	chr19	5406874	5422847	RIKEN cDNA 4930481A15 gene
Rtn4rl2	3.6012063	269295	3.8079464	1.1194993	chr2	84712103	84726849	reticulon 4 receptor-like 2
Gda	3.6008205	14544	24.081244	7.0804143	chr19	21465797	21547151	guanine deaminase
Ace	3.5873806	11421	30.533644	9.011194	chr11	105829261	105851261	angiotensin I converting enzyme (peptidyl-dipeptidase A) 1
Mpeg1	3.5128248	17476	3.6522024	1.1007268	chr19	12535269	12539775	macrophage expressed gene 1
Ada	3.5025158	11486	52.374687	15.831511	chr2	163552320	163575913	adenosine deaminase
Laptm5	3.4979496	16792	6.836671	2.069246	chr4	130469249	130492063	lysosomal-associated protein transmembrane 5
Bst2	3.493664	69550	129.30608	39.1849	chr8	74058161	74061336	bone marrow stromal cell antigen 2
Pydc3	3.4881847	100033459	7.420021	2.2520947	chr1	175603811	175628523	pyrin domain containing 3
Gm15459	3.4689074	727711	6.8513727	2.091058	chr5	5782335	5783620	heat shock protein 8 pseudogene
Irgm1	3.467236	15944	57.061283	17.423649	chr11	48678751	48684848	immunity-related GTPase family M member 1
Map3k6	3.4385636	53608	16.14779	4.9718423	chr4	132796733	132808843	mitogen-activated protein kinase kinase kinase 6
Zfp423	3.395928	94187	4.939722	1.5400156	chr8	90185709	90483494	zinc finger protein 423
Shroom2	3.3947687	110380	15.086086	4.7048683	chrX	149044052	149204004	shroom family member 2
Serpina3h	3.3857014	546546	165.5942	51.781826	chr12	105486106	105492615	"serine (or cysteine) peptidase inhibitor, clade A, member 3H"
Ctss	3.3566258	13040	11.955197	3.7708135	chr3	95330708	95360325	cathepsin S
Entpd1	3.352622	12495	140.71931	44.437557	chr19	40686887	40816092	ectonucleoside triphosphate diphosphohydrolase 1
Ier3	3.3414774	15937	79.13982	25.074808	chr17	35958658	35959856	immediate early response 3
Ifi27l2a	3.3382308	76933	23.853783	7.565229	chr12	104672083	104681890	"interferon, alpha-inducible protein 27 like 2A"
Itga1	3.3151639	109700	5.753261	1.8373425	chr13	115748289	115892172	integrin alpha 1
Fabp4	3.3071027	11770	722.9589	231.44464	chr3	10204343	10208576	"fatty acid binding protein 4, adipocyte"
Mall	3.2829256	228576	4.2322073	1.3648565	chr2	127530126	127555633	"mal, T cell differentiation protein-like"
Myrip	3.2759128	245049	16.39181	5.2975583	chr9	120213191	120383952	myosin VIIA and Rab interacting protein
Tgtp2	3.2744362	100039796	14.476471	4.6806636	chr11	48870698	48877714	T cell specific GTPase 2
Tap1	3.2519615	21354	28.668606	9.333453	chr17	34324501	34334170	"transporter 1, ATP-binding cassette, sub-family B (MDR/TAP)"
Ifitm3	3.238875	66141	4037.2317	1319.6864	chr7	148195489	148196643	interferon induced transmembrane protein 3
Rtp4	3.2328086	67775	84.161644	27.562283	chr16	23610005	23614308	receptor transporter protein 4
Fam69a	3.2273128	67266	4.4057255	1.4452984	chr5	108337061	108416096	"family with sequence similarity 69, member A"
Chn2	3.2104373	69993	5.195358	1.7132956	chr6	53989926	54251806	chimerin (chimaerin) 2
D14Ertd668e	3.1911767	219132	48.03128	15.935078	chr14	59966244	59984327	"DNA segment, Chr 14, ERATO Doi 668, expressed"
Unc5a	3.1812901	107448	3.823935	1.2725896	chr13	55050793	55107379	unc-5 homolog A (C. elegans)
Cd74	3.1700444	16149	18.726013	6.254047	chr18	60963503	60972306	"CD74 antigen (invariant polypeptide of major histocompatibility complex, class II antigen-associated)"
Cmpk2	3.165557	22169	31.011059	10.371642	chr12	27154080	27164702	"cytidine monophosphate (UMP-CMP) kinase 2, mitochondrial"
Spsb1	3.1536872	74646	3.7822523	1.2697347	chr4	149270393	149329115	splA/ryanodine receptor domain and SOCS box containing 1
H2-Q8	3.151097	15019	115.82557	38.915607	chr17	35531044	35532577	"histocompatibility 2, Q region locus 8"
Cry2	3.144052	12953	7.617925	2.56524	chr2	92243804	92274226	cryptochrome 2 (photolyase-like)
Mdk	3.13559	17242	6.6354856	2.2404463	chr2	91769979	91772439	midkine
Usp18	3.1269937	24110	32.561764	11.024579	chr6	121195924	121220935	ubiquitin specific peptidase 18
H19	3.1183984	14955	27.42878	9.312278	chr7	149761436	149764051	H19 fetal liver mRNA
Pfkfb3	3.117199	170768	19.325554	6.563698	chr2	11393058	11475556	"6-phosphofructo-2-kinase/fructose-2,6-biphosphatase 3"
Lhx6	3.107146	16874	7.017603	2.3911572	chr2	35937473	35960928	LIM homeobox protein 6
Tyrobp	3.1049657	22177	23.957405	8.16891	chr7	31198807	31202598	TYRO protein tyrosine kinase binding protein
Itprip	3.0928211	414801	51.934563	17.778	chr19	47969084	47993789	"inositol 1,4,5-triphosphate receptor interacting protein"
Nlrp1a	3.0792491	195046	7.722987	2.6553493	chr11	70904699	70958206	"NLR family, pyrin domain containing 1A"
Angpt2	3.0758924	11601	11.537696	3.9712665	chr8	18691337	18741551	angiopoietin 2
Serpina3i	3.0458763	628900	15.958547	5.547052	chr12	105501332	105507575	"serine (or cysteine) peptidase inhibitor, clade A, member 3I"
Gbp4	3.0155427	17472	48.31647	16.96332	chr5	105544786	105568571	guanylate binding protein 4
Synpo	3.012114	104027	26.164862	9.196623	chr18	60753644	60789739	synaptopodin
Cybb	3.011928	13058	3.6347673	1.2776538	chrX	9012378	9046450	"cytochrome b-245, beta polypeptide"
Gm12216	3.011053	622459	5.252891	1.8469751	chr11	53598991	53672758	predicted gene 12216
Mxra8	3.0081983	74761	29.338312	10.325469	chr4	155213789	155218211	matrix-remodelling associated 8
Dhx58	3.0081723	80861	13.780482	4.8500113	chr11	100556198	100565585	DEXH (Asp-Glu-X-His) box polypeptide 58
Wee1	2.9927197	22390	3.0770416	1.0885499	chr7	117265573	117286813	WEE 1 homolog 1 (S. pombe)
Cdc42ep4	2.9906352	56699	62.488594	22.121704	chr11	113588164	113613129	CDC42 effector protein (Rho GTPase binding) 4
Sele	2.9881592	20339	82.64917	29.283016	chr1	165978365	165987808	"selectin, endothelial cell"
Egr1	2.9824975	13653	208.18225	73.900024	chr18	35020861	35024610	early growth response 1
Ly6c1	2.9515796	17067	1534.0457	550.25616	chr15	74875445	74879260	"lymphocyte antigen 6 complex, locus C1"
N4bp3	2.9475162	212706	12.815954	4.6033683	chr11	51456591	51464575	NEDD4 binding protein 3
Isg20	2.9436967	57444	15.852314	5.7013884	chr7	86058344	86065282	interferon-stimulated protein
Eln	2.9257803	13717	36.55232	13.226786	chr5	135178466	135223124	elastin
Plin2	2.9175007	11520	39.957874	14.500151	chr4	86302469	86315963	perilipin 2
Npnt	2.916452	114249	4.1628227	1.5111729	chr3	132545659	132613255	nephronectin
Cd274	2.9047768	60533	15.137994	5.5174274	chr19	29441928	29462584	CD274 antigen
1500011B03Rik	2.9009056	66236	10.039292	3.6639583	chr5	115258205	115263985	RIKEN cDNA 1500011B03 gene
Gja1	2.8944752	14609	4.550014	1.6642706	chr10	56097079	56110225	"gap junction protein, alpha 1"
Igfbp3	2.890828	16009	47.011665	17.217278	chr11	7106096	7113926	insulin-like growth factor binding protein 3
Pdlim1	2.888843	54132	9.886779	3.6233635	chr19	40296729	40346106	PDZ and LIM domain 1 (elfin)
Sema7a	2.8717492	20361	129.85487	47.87325	chr9	57787942	57810672	"sema domain, immunoglobulin domain (Ig), and GPI membrane anchor, (semaphorin) 7A"
Socs3	2.8666036	12702	47.524406	17.552143	chr11	117827401	117830680	suppressor of cytokine signaling 3
Parp9	2.8639028	80285	27.197882	10.054439	chr16	35938556	35972691	"poly (ADP-ribose) polymerase family, member 9"
Cks1b	2.8481178	54124	5.1236157	1.9045821	chr3	89219394	89222213	CDC28 protein kinase 1b
Ube2l6	2.8037508	56791	112.97371	42.659832	chr2	84638985	84650160	ubiquitin-conjugating enzyme E2L 6
Gpc3	2.7979484	14734	3.4868946	1.3194115	chrX	49625604	49967151	glypican 3
Gm11728	2.7918587	100042036	8.578359	3.253059	chr11	116896396	116958341	predicted gene 11728
Ttc30b	2.786756	72421	4.507322	1.7123821	chr2	75773907	75776519	tetratricopeptide repeat domain 30B
Stk17b	2.759897	98267	5.416526	2.077826	chr1	53812356	53842059	serine/threonine kinase 17b (apoptosis-inducing)
Filip1l	2.7452722	78749	50.846024	19.60887	chr16	57353390	57572917	filamin A interacting protein 1-like
H2-K1	2.7440639	14972	1520.6324	586.69305	chr17	34132957	34137278	"histocompatibility 2, K1, K region"
Oas1a	2.7283568	246730	26.22528	10.176539	chr5	121346266	121357534	2'-5' oligoadenylate synthetase 1A
Lrp3	2.7264044	435965	4.5986433	1.7857493	chr7	35985953	36000364	low density lipoprotein receptor-related protein 3
S100a6	2.716476	20200	279.82446	109.05887	chr3	90416816	90418336	S100 calcium binding protein A6 (calcyclin)
Mmp2	2.7096894	17390	6.5199275	2.5474424	chr8	95351227	95377319	matrix metallopeptidase 2
Tinagl1	2.6875072	94242	103.992355	40.966873	chr4	129841698	129852366	tubulointerstitial nephritis antigen-like 1
Col4a2	2.6872106	12827	257.17188	101.32178	chr8	11312829	11449287	"collagen, type IV, alpha 2"
Qsox1	2.6831014	104009	25.238544	9.958824	chr1	157625285	157660029	quiescin Q6 sulfhydryl oxidase 1
Il15	2.671895	16168	3.6915483	1.4627501	chr8	84855523	84927110	interleukin 15
Gsta4	2.65917	14860	3.2586453	1.2973946	chr9	78039773	78057156	"glutathione S-transferase, alpha 4"
Ucp2	2.6587067	22228	178.61073	71.1243	chr7	107641854	107650682	"uncoupling protein 2 (mitochondrial, proton carrier)"
Crim1	2.6513476	50766	35.032253	13.98886	chr17	78599588	78775932	cysteine rich transmembrane BMP regulator 1 (chordin like)
Trim30d	2.641014	209387	3.929515	1.5752493	chr7	111618529	111656363	tripartite motif-containing 30D
Aqp11	2.6395848	66333	5.3274803	2.136817	chr7	104874889	104886757	aquaporin 11
Hoxb9	2.6327667	15417	6.0464435	2.4314682	chr11	96132644	96137907	homeobox B9
Maff	2.6189923	17133	14.646097	5.9206424	chr15	79178108	79189506	"v-maf musculoaponeurotic fibrosarcoma oncogene family, protein F (avian)"
Znfx1	2.6179633	98999	48.2918	19.529495	chr2	166861297	166888515	"zinc finger, NFX1-type containing 1"
Rnf213	2.6157007	672511	81.99168	33.18659	chr11	119287376	119348731	ring finger protein 213
Arhgdib	2.6129088	11857	11.347754	4.5979757	chr6	136872230	136890238	"Rho, GDP dissociation inhibitor (GDI) beta"
Cfb	2.6078367	14962	38.13363	15.48135	chr17	34993319	34999459	complement factor B
Mx2	2.6061943	17858	13.545062	5.502441	chr16	97757688	97782508	myxovirus (influenza virus) resistance 2
Klhl6	2.59635	239743	29.744743	12.129089	chr16	19946586	19983122	kelch-like 6 (Drosophila)
Tnfrsf12a	2.594522	27279	11.91048	4.860187	chr17	23812412	23814416	"tumor necrosis factor receptor superfamily, member 12a"
1700020L24Rik	2.5896266	66330	7.933754	3.2435653	chr11	83251196	83254734	RIKEN cDNA 1700020L24 gene
Serinc3	2.5730264	26943	1481.3269	609.51996	chr2	163449009	163470879	serine incorporator 3
Gbp9	2.5713296	236573	136.22978	56.0913	chr5	105507413	105539311	guanylate-binding protein 9
Acer2	2.5632718	230379	206.1025	85.127426	chr4	86520318	86580726	alkaline ceramidase 2
Nlrc5	2.5567565	434341	8.688957	3.5979867	chr8	96996663	97051172	"NLR family, CARD domain containing 5"
Col4a1	2.5487394	12826	239.93703	99.66739	chr8	11198423	11312826	"collagen, type IV, alpha 1"
Oas1g	2.5445342	23960	8.840028	3.6781244	chr5	121326151	121337607	2'-5' oligoadenylate synthetase 1G
F2r	2.5411892	14062	610.58136	254.38263	chr13	96371744	96388388	coagulation factor II (thrombin) receptor
Hoxd8	2.5343533	15437	8.262173	3.4515028	chr2	74543546	74545364	homeobox D8
Phf11	2.531952	219131	12.820532	5.3608265	chr14	59895750	59916359	PHD finger protein 11
Xaf1	2.5256865	327959	42.389153	17.768723	chr11	72115131	72127235	XIAP associated factor 1
Gm6548	2.4877791	625054	8.552407	3.639632	chr17	79249845	79251884	eukaryotic translation elongation factor 1 alpha 1 pseudogene
Hmcn1	2.4844298	545370	6.3463335	2.70444	chr1	152409632	152840565	hemicentin 1
Jdp2	2.4762049	81703	10.403261	4.4479914	chr12	86940055	86980828	Jun dimerization protein 2
Hspa2	2.4701886	15512	3.6343691	1.5576864	chr12	77505163	77507923	heat shock protein 2
Pmepa1	2.464955	65112	25.346226	10.886424	chr2	173049966	173102034	"prostate transmembrane protein, androgen induced 1"
Abcg2	2.463699	26357	34.78674	14.948827	chr6	58546666	58642445	"ATP-binding cassette, sub-family G (WHITE), member 2"
Tmtc1	2.457273	387314	36.837162	15.871352	chr6	148180952	148392874	transmembrane and tetratricopeptide repeat containing 1
Clec14a	2.454896	66864	17.041656	7.3495355	chr12	59365707	59370245	"C-type lectin domain family 14, member a"
Nek6	2.4532204	59126	7.973878	3.441233	chr2	38367217	38443010	NIMA (never in mitosis gene a)-related expressed kinase 6
Gm20039	2.450776	100504059	4.6617427	2.0138435	chr18	90749217	90758976	60S ribosomal protein L32-like
St8sia6	2.4473464	241230	4.593332	1.9870715	chr2	13576565	13715147	"ST8 alpha-N-acetyl-neuraminide alpha-2,8-sialyltransferase 6"
Trafd1	2.4458156	231712	115.840195	50.14373	chr5	121821734	121835624	TRAF type zinc finger domain containing 1
Spats2l	2.437869	67198	13.727327	5.9615145	chr1	57831705	58005241	"spermatogenesis associated, serine-rich 2-like"
Klf9	2.4328866	16601	50.56572	22.004692	chr19	23215716	23241401	Kruppel-like factor 9
Gprc5b	2.42742	64297	14.25694	6.2181706	chr7	126115554	126138725	"G protein-coupled receptor, family C, group 5, member B"
Cdkn1a	2.4151804	12575	164.00282	71.89235	chr17	29227931	29237667	cyclin-dependent kinase inhibitor 1A (P21)
Dtx3l	2.4118714	209200	27.98703	12.285249	chr16	35926601	35939113	deltex 3-like (Drosophila)
Gas7	2.4093666	14457	31.721106	13.938832	chr11	67346500	67502494	growth arrest specific 7
Thrsp	2.4011638	21835	37.7851	16.660185	chr7	104561467	104566020	thyroid hormone responsive SPOT14 homolog (Rattus)
Tm6sf1	2.3988602	107769	3.8071907	1.6802771	chr7	89003908	89028954	transmembrane 6 superfamily member 1
Timp1	2.3988063	21857	4.080531	1.800954	chrX	20447292	20451863	tissue inhibitor of metalloproteinase 1
Errfi1	2.3972766	74155	17.403736	7.6860857	chr4	150228028	150242989	ERBB receptor feedback inhibitor 1
Fam101b	2.3954804	76566	49.217583	21.752481	chr11	75832697	75841284	"family with sequence similarity 101, member B"
P2ry2	2.3933625	18442	13.57865	6.0066075	chr7	108145086	108160527	"purinergic receptor P2Y, G-protein coupled 2"
Sema6b	2.3901389	20359	18.546211	8.215106	chr17	56262508	56279766	"sema domain, transmembrane domain (TM), and cytoplasmic domain, (semaphorin) 6B"
Uck2	2.3882136	80914	6.453312	2.8608205	chr1	169156217	169215258	uridine-cytidine kinase 2
Psmb9	2.38617	16912	394.89395	175.2105	chr17	34319044	34324275	"proteasome (prosome, macropain) subunit, beta type 9 (large multifunctional peptidase 2)"
Uchl1	2.377424	22223	102.804665	45.781197	chr5	67067360	67078473	ubiquitin carboxy-terminal hydrolase L1
Sik1	2.3735564	17691	6.231731	2.7796502	chr17	31981195	31992737	salt inducible kinase 1
Tril	2.3731875	66873	8.382062	3.739383	chr6	53765462	53770819	TLR4 interactor with leucine-rich repeats
Actn1	2.3692534	109711	8.793523	3.9294553	chr12	81268529	81361358	"actinin, alpha 1"
4831426I19Rik	2.3684797	212073	6.6229877	2.960502	chr12	106168159	106248019	RIKEN cDNA 4831426I19 gene
Gm4951	2.3564782	240327	17.151867	7.7060037	chr18	60371731	60407474	predicted gene 4951
Tmco4	2.356413	77056	3.0113764	1.3529909	chr4	138528820	138615086	transmembrane and coiled-coil domains 4
Daxx	2.3542612	13163	22.538029	10.135434	chr17	34046390	34052535	Fas death domain-associated protein
Ddx60	2.3525608	234311	10.535111	4.741104	chr8	64406886	64516492	DEAD (Asp-Glu-Ala-Asp) box polypeptide 60
Ctrl	2.3379607	109660	3.8425696	1.7400655	chr8	108455894	108457762	chymotrypsin-like
Odc1	2.3335595	18263	19.891512	9.024646	chr12	17551679	17558308	"ornithine decarboxylase, structural 1"
Nmb	2.3325732	68039	25.54455	11.59429	chr7	88047113	88049957	neuromedin B
Man1c1	2.3319929	230815	36.027184	16.35627	chr4	134117605	134260205	"mannosidase, alpha, class 1C, member 1"
Mir703	2.3182502	735265	12.983558	5.9294505	chr5	98904575	98904683	microRNA 703
Gbp7	2.3135033	229900	46.65771	21.351799	chr3	142193302	142213047	guanylate binding protein 7
Capg	2.3077266	12332	22.551632	10.346057	chr6	72494433	72512974	"capping protein (actin filament), gelsolin-like"
Gramd4	2.3046534	223752	3.1813946	1.4614807	chr15	85888137	85968064	GRAM domain containing 4
B2m	2.3028991	12010	1680.716	772.68207	chr2	121973423	121978818	beta-2 microglobulin
Mkl2	2.2990022	239719	68.340355	31.471594	chr16	13256574	13417622	MKL/myocardin-like 2
Apoe	2.2958767	11816	23.01013	10.610882	chr7	20281593	20284515	apolipoprotein E
Zc3h6	2.2920554	78751	4.4549203	2.057765	chr2	128793138	128844299	zinc finger CCCH type containing 6
Ltc4s	2.281054	17001	25.986834	12.061426	chr11	50049971	50051973	leukotriene C4 synthase
Mmp17	2.2783363	23948	14.55758	6.76476	chr5	130090089	130114086	matrix metallopeptidase 17
Flrt2	2.2734783	399558	26.238182	12.218673	chr12	96930436	97023423	fibronectin leucine rich transmembrane protein 2
Ear2	2.2694287	13587	5.093309	2.376099	chr14	44680319	44681196	"eosinophil-associated, ribonuclease A family, member 2"
Tacc2	2.263593	57752	4.700644	2.1985688	chr7	137720998	137908298	"transforming, acidic coiled-coil containing protein 2"
Ifi44	2.260716	99899	159.76411	74.8194	chr3	151393887	151412923	interferon-induced protein 44
Lgals3bp	2.2578292	19039	421.3098	197.55666	chr11	118254066	118263245	"lectin, galactoside-binding, soluble, 3 binding protein"
Gm9580	2.2541978	672857	414.31332	194.58896	chr17	39981081	39981190	predicted gene 9580
Stat1	2.2519145	20846	55.653732	26.165165	chr1	52176282	52218707	signal transducer and activator of transcription 1
Gm16845	2.248897	100503652	3.761183	1.7706635	chr9	21875476	21890566	"predicted gene, 16845"
Zfp36	2.248202	22695	367.92664	173.26347	chr7	29161803	29164247	zinc finger protein 36
Rai14	2.240354	75646	35.98247	17.004173	chr15	10498733	10644386	retinoic acid induced 14
Phf15	2.2376974	76901	11.96222	5.659673	chr11	51626958	51670983	PHD finger protein 15
Stom	2.235694	13830	35.502674	16.812397	chr2	35169510	35192529	stomatin
Dbh	2.232197	13166	8.510635	4.036551	chr2	27021027	27038724	dopamine beta hydroxylase
Rom1	2.2231336	19881	4.928346	2.3470197	chr19	9001872	9003846	rod outer segment membrane protein 1
Pnpla2	2.214944	66853	59.876194	28.620188	chr7	148641087	148646642	patatin-like phospholipase domain containing 2
Procr	2.2103572	19124	50.382202	24.13214	chr2	155576953	155581214	"protein C receptor, endothelial"
Hmga1	2.2025437	15361	22.109268	10.627497	chr17	27693519	27700617	high mobility group AT-hook 1
Cerk	2.1999638	223753	11.0949135	5.3393636	chr15	85969531	86016571	ceramide kinase
Inpp5d	2.1941037	16331	48.2267	23.270798	chr1	89516887	89617083	inositol polyphosphate-5-phosphatase D
Ly6e	2.185267	17069	1608.9298	779.49615	chr15	74785481	74790335	"lymphocyte antigen 6 complex, locus E"
Slfn2	2.1786983	20556	52.478817	25.501638	chr11	82878614	82884180	schlafen 2
Car8	2.1701703	12319	6.6594915	3.248841	chr4	8068640	8166188	carbonic anhydrase 8
Gm1821	2.168874	218963	127.63533	62.304253	chr14	46703702	46704632	ubiquitin pseudogene
Mndal	2.167319	100040462	18.950783	9.257325	chr1	175677425	175844310	myeloid nuclear differentiation antigen like
Rcn3	2.165612	52377	4.4233217	2.1624649	chr7	52338284	52347583	"reticulocalbin 3, EF-hand calcium binding domain"
Cgnl1	2.1555872	68178	11.169406	5.4858713	chr9	71474316	71619409	cingulin-like 1
Efhd1	2.1552851	98363	5.1518703	2.530704	chr1	89160939	89207366	EF hand domain containing 1
Pdgfa	2.1524568	18590	17.24084	8.480183	chr5	139452929	139470907	"platelet derived growth factor, alpha"
Ehd4	2.1391664	98878	128.96892	63.829533	chr2	119915223	119980311	EH-domain containing 4
Bmper	2.136367	73230	38.69649	19.176832	chr9	23027520	23289646	BMP-binding endothelial regulator
Slfn3	2.1347394	20557	17.76399	8.810015	chr11	83004832	83028656	schlafen 3
Zfp580	2.1311214	68992	11.202567	5.5653224	chr7	5003134	5005325	zinc finger protein 580
Pparg	2.1244206	19016	6.2574844	3.1184607	chr6	115311239	115440419	peroxisome proliferator activated receptor gamma
Gm4902	2.1242242	236451	32.90321	16.399067	chr14	59939801	59960167	predicted gene 4902
C1qtnf6	2.1145475	72709	18.351048	9.18807	chr15	78353776	78360081	C1q and tumor necrosis factor related protein 6
Ifi30	2.1144168	65972	7.6578083	3.8343778	chr8	73286672	73290562	interferon gamma inducible protein 30
Fam198b	2.1130273	68659	4.94224	2.4762805	chr3	79689852	79750200	"family with sequence similarity 198, member B"
Slc6a6	2.1108062	21366	524.3812	263.01477	chr6	91634061	91709057	"solute carrier family 6 (neurotransmitter transporter, taurine), member 6"
Adamts6	2.1095562	108154	5.0805864	2.5497856	chr13	105077953	105284843	"a disintegrin-like and metallopeptidase (reprolysin type) with thrombospondin type 1 motif, 6"
Fpgs	2.1084619	14287	14.494167	7.2779436	chr2	32538129	32549695	folylpolyglutamyl synthetase
Fitm2	2.1046937	228859	3.467303	1.7441506	chr2	163294439	163298365	fat storage-inducing transmembrane protein 2
Pdgfb	2.1029623	18591	74.78434	37.649605	chr15	79826306	79845238	"platelet derived growth factor, B polypeptide"
Fam70a	2.1020727	245386	4.0694046	2.0495768	chrX	35550478	35605658	"family with sequence similarity 70, member A"
Chst2	2.0965981	54371	20.754442	10.480376	chr9	95301345	95307689	carbohydrate sulfotransferase 2
Dap	2.0916653	223453	11.829083	5.987424	chr15	31154140	31204093	death-associated protein
Slc1a5	2.0843093	20514	7.6832037	3.902664	chr7	17366695	17383623	"solute carrier family 1 (neutral amino acid transporter), member 5"
Rhob	2.0825684	11852	553.8328	281.55328	chr12	8504565	8506791	"ras homolog gene family, member B"
Tubb6	2.078301	67951	17.914574	9.125974	chr18	67550385	67562403	"tubulin, beta 6 class V"
Parp14	2.0727746	547253	63.12501	32.242634	chr16	35832964	35871468	"poly (ADP-ribose) polymerase family, member 14"
Tsc22d1	2.071405	21807	100.1205	51.172775	chr14	76814768	76907573	"TSC22 domain family, member 1"
Slc43a3	2.06979	58207	313.31857	160.26581	chr2	84776813	84798666	"solute carrier family 43, member 3"
Ccny	2.0665169	67974	57.7985	29.61138	chr18	9314042	9450148	cyclin Y
Junb	2.0532598	16477	63.242596	32.609715	chr8	87498383	87502617	Jun-B oncogene
Cdc42ep3	2.0526478	260409	11.548155	5.956335	chr17	79733365	79754431	CDC42 effector protein (Rho GTPase binding) 3
Rnf144b	2.0509944	218215	36.073345	18.621	chr13	47218089	47343360	ring finger protein 144B
Per3	2.0485418	18628	4.6349773	2.395433	chr4	150377764	150418731	period homolog 3 (Drosophila)
Col18a1	2.0445726	12822	28.486002	14.75061	chr10	76514924	76629275	"collagen, type XVIII, alpha 1"
Slc3a2	2.0328708	17254	89.947075	46.844475	chr19	8781372	8797859	"solute carrier family 3 (activators of dibasic and neutral amino acid transport), member 2"
Sulf2	2.0311716	72043	20.775583	10.828986	chr2	165898589	165981156	sulfatase 2
Zswim7	2.0263236	69747	3.6720188	1.9185678	chr11	62080726	62094897	"zinc finger, SWIM-type containing 7"
Acta2	2.022604	11475	7.380923	3.863499	chr19	34314827	34329826	"actin, alpha 2, smooth muscle, aorta"
Ly6i	2.0202656	57248	3.0319233	1.5888788	chr15	74810242	74813860	"lymphocyte antigen 6 complex, locus I"
Cirbp	2.0179439	12696	77.30041	40.55587	chr10	79630586	79634398	cold inducible RNA binding protein
Gpr56	2.015315	14766	131.6246	69.1473	chr8	97501009	97538108	G protein-coupled receptor 56
1700084E18Rik	2.013029	67350	5.8765006	3.0906496	chr2	30092718	30093151	RIKEN cDNA 1700084E18 gene
Pim3	2.0101647	223775	69.45102	36.578682	chr15	88692624	88696156	proviral integration site 3
Gem	2.0018134	14579	36.25348	19.17376	chr4	11631594	11642140	GTP binding protein (gene overexpressed in skeletal muscle)
Pim1	2.0001547	18712	6.2193556	3.2920234	chr17	29627990	29632404	proviral integration site 1
