# Supplementary material for: Pathogenic pathways are activated in each major cell type of the glomerulus in the Cd2ap mutant mouse model of focal segmental glomerulosclerosis
Source: BMC Nephrol. 2015 May 13;16:71. doi: 10.1186/s12882-015-0063-z (PMC4430919; doi:10.1186/s12882-015-0063-z)
Supplement: Additional file 16: Table S16. — Functional enrichment analysis of genes with higher expression in Cd2ap mutant endothelial cells. Columns show functional category (molecular function or biological process), name of function, uncorrected P-value, FDR Benjamini and Hochberg corrected P value, Hit count in gene list, Hit count in genome, Genes with hit in gene list. [file 12882_2015_63_MOESM16_ESM.xls]

Gene Symbol	FC ([wt] vs [mut])	Gene ID	WT RPKM	Mut RPKM	Chromosome	Start	End	Description
Hba-a2	36.866398	110257	3.2499964	0	chr11	32196489	32197310	"hemoglobin alpha, adult chain 2"
4933417G07Rik	17.622044	71182	3.6730983	0.19687714	chr3	55651027	55651987	SEC13 homolog pseudogene
LOC100416360	16.065199	100416360	4.178527	0.24567221	chr17	36248374	36254068	ribosomal protein S6 pseudogene
Dlk1	15.302396	13386	5.8933954	0.36376843	chr12	110691033	110701546	delta-like 1 homolog (Drosophila)
Gm626	14.617548	268729	6.9674845	0.45021525	chr14	34378484	34388440	predicted gene 626
Gm14207	12.328931	100043609	10.991833	0.8421	chr2	119146935	119151933	predicted gene 14207
Gimap3	10.921731	83408	39.368706	3.4046981	chr6	48714463	48720850	"GTPase, IMAP family member 3"
Dpp4	9.39223	13482	3.145826	0.31636247	chr2	62168130	62250288	dipeptidylpeptidase 4
2900005J15Rik	9.193246	67261	5.6612353	0.58164936	chr5	24606793	24608825	RIKEN cDNA 2900005J15 gene
C1qtnf2	8.541975	69183	3.532269	0.39058405	chr11	43287808	43305027	C1q and tumor necrosis factor related protein 2
Snord35a	7.7264476	27211	4.78359	0.5847806	chr7	52381717	52381805	"small nucleolar RNA, C/D box 35A"
Shisa9	7.350182	72555	3.306735	0.42493266	chr16	11984206	12270997	shisa homolog 9 (Xenopus laevis)
Rnu11	7.2456326	353373	3.8299856	0.49927488	chr4	131825994	131826101	U11 small nuclear RNA
Calca	7.128373	12310	4.924204	0.6524758	chr7	121774992	121779871	"calcitonin/calcitonin-related polypeptide, alpha"
Gm13199	6.9615264	791411	3.683631	0.49979335	chr2	5783130	5783969	predicted gene 13199
Mir26a-1	6.8950114	387218	3.82262	0.15766576	chr9	118940914	118941003	microRNA 26a-1
Astn1	6.6975403	11899	11.779948	1.6612955	chr1	160292471	160621917	astrotactin 1
H2-Q10	6.588	15007	3.0997498	0.4444183	chr17	35607034	35611508	"histocompatibility 2, Q region locus 10"
Scn7a	6.4577665	20272	6.2957745	0.92084324	chr2	66511483	66622967	"sodium channel, voltage-gated, type VII, alpha"
1600029D21Rik	6.3513875	76509	3.042758	0.452499	chr9	50302630	50313744	RIKEN cDNA 1600029D21 gene
Gm10499	6.277891	69717	4.327679	0.65111876	chr17	36278694	36282689	predicted gene 10499
E130006D01Rik	6.18424	269683	12.6411915	1.9307258	chr5	112163304	112190745	RIKEN cDNA E130006D01 gene
Snord53	5.9384775	100217456	4.357475	0.4451739	chr17	71990229	71990296	"small nucleolar RNA, C/D box 53"
Rasgrf2	5.8963923	19418.chr13.1	3.5676267	0.5714944	chr13	92099320	92127647	RAS protein-specific guanine nucleotide-releasing factor 2
Adamts16	5.839439	271127	39.812435	6.4397135	chr13	70866686	70980688	"a disintegrin-like and metallopeptidase (reprolysin type) with thrombospondin type 1 motif, 16"
Gm13861	5.6987324	100039184	6.172499	1.0230613	chr6	34601358	34603894	predicted gene 13861
Epha6	5.6151814	13840	6.8016	1.1441057	chr16	59653309	60605357	Eph receptor A6
Gm16867	5.4186482	100504489	6.859614	1.195715	chr14	69981969	70040083	"predicted gene, 16867"
2210404O07Rik	5.362353	72273	7.238672	1.2750362	chr10	80855809	80857824	RIKEN cDNA 2210404O07 gene
Galnt14	5.351077	71685	3.006682	0.5307199	chr17	73843091	74059791	UDP-N-acetyl-alpha-D-galactosamine:polypeptide N-acetylgalactosaminyltransferase 14
Gm5820	5.035414	545253	4.19689	0.7872475	chr18	39052110	39130928	predicted gene 5820
Col4a3	4.9850397	12828	4.0094156	0.75968105	chr1	82583496	82718634	"collagen, type IV, alpha 3"
Mirlet7g	4.9421344	387249	5.118504	0.97824436	chr9	106081171	106081258	microRNA let7g
Lypd6	4.891744	320343	26.7608	5.167188	chr2	49921982	50049084	LY6/PLAUR domain containing 6
Tspan13	4.8894863	66109	14.530667	2.8069916	chr12	36741142	36769065	tetraspanin 13
Fgf1	4.765581	14164	216.74306	42.958405	chr18	38998327	39089058	fibroblast growth factor 1
Xist	4.7063565	213742	175.58876	35.239586	chrX	100655712	100678572	inactive X specific transcripts
Gm16386	4.5819464	100042679	3.5597775	0.7338238	chr17	22916825	22954714	predicted gene 16386
Msr1	4.5799656	20288	3.384628	0.69802	chr8	40667054	40728032	macrophage scavenger receptor 1
BB114351	4.5588856	100503680	4.8378673	1.0023378	chr2	72062745	72070359	expressed sequence BB114351
Snord111	4.4837503	100217465	3.4956675	0.04434349	chr8	113362435	113362498	"small nucleolar RNA, C/D box 111"
Mir17hg	4.422433	75957	3.014965	0.6439319	chr14	115443527	115445950	MIR17 host gene 1 (non-protein coding)
5033406O09Rik	4.3652864	77675	3.0191998	0.6532779	chr12	113180202	113182693	RIKEN cDNA 5033406O09 gene
Snord35b	4.3513823	27212	7.145252	1.5509909	chr7	52378396	52378481	"small nucleolar RNA, C/D box 35B"
Adamts5	4.2712884	23794	67.1887	14.857856	chr16	85858402	85901370	"a disintegrin-like and metallopeptidase (reprolysin type) with thrombospondin type 1 motif, 5 (aggrecanase-2)"
A930012L18Rik	4.239859	626275	3.6044445	0.8029821	chr18	44821319	44835925	RIKEN cDNA A930012L18 gene
Sema5a	4.230781	20356	85.414635	19.069122	chr15	32174568	32626096	"sema domain, seven thrombospondin repeats (type 1 and type 1-like), transmembrane domain (TM) and short cytoplasmic domain, (semaphorin) 5A"
Cmah	4.1189113	12763	11.175288	2.5626855	chr13	24419289	24569154	cytidine monophospho-N-acetylneuraminic acid hydroxylase
Hey2	4.1003094	15214	9.812462	2.2603738	chr10	30552165	30562589	hairy/enhancer-of-split related with YRPW motif 2
A730085A09Rik	4.0128155	399570	8.492296	1.9989166	chr4	98460459	98465596	RIKEN cDNA A730085A09 gene
Chpt1	3.83499	212862	13.164591	3.2423668	chr10	87935558	87966715	choline phosphotransferase 1
Dkk2	3.7897983	56811	107.04449	26.678867	chr3	131748256	131843268	dickkopf homolog 2 (Xenopus laevis)
Ces2g	3.7676172	72361	108.32728	27.157509	chr8	107485618	107493437	carboxylesterase 2G
0610010O12Rik	3.767189	66060	6.547578	1.6416564	chr18	36508278	36562632	RIKEN cDNA 0610010O12 gene
Fam81a	3.7484133	76886	12.205379	3.075549	chr9	69937117	69989364	"family with sequence similarity 81, member A"
Hs3st1	3.7386534	15476	4.53553	1.1458604	chr5	40005174	40035870	heparan sulfate (glucosamine) 3-O-sulfotransferase 1
Mir680-1	3.640234	735268	5.017227	1.3018273	chr6	129641553	129641661	microRNA 680-1
Vangl2	3.5979915	93840	25.8927	6.7972937	chr1	173934502	173958176	"vang-like 2 (van gogh, Drosophila)"
Cobll1	3.5892806	319876	3.3480427	0.8810541	chr2	64926396	65077460	Cobl-like 1
Mir680-2	3.5826812	751551	37.513103	9.889942	chrX	140732333	140732442	microRNA 680-2
Snord95	3.5579488	100216540	9.694651	2.5736616	chr11	48616641	48616708	"small nucleolar RNA, C/D box 95"
Cd36	3.5565317	12491	90.81108	24.11744	chr5	17287508	17394777	CD36 antigen
Tmem108	3.5431762	81907	3.7729578	1.0057917	chr9	103385266	103664167	transmembrane protein 108
Gsn	3.5361252	227753	3.2147818	0.85870254	chr2	35111931	35163412	gelsolin
Ces2e	3.528254	234673	43.055088	11.526132	chr8	107450160	107458572	carboxylesterase 2E
Fam78b	3.5230103	226610	4.267254	1.1440728	chr1	168931548	169021433	"family with sequence similarity 78, member B"
Il27ra	3.515711	50931	6.601139	1.7734727	chr8	86554185	86566474	"interleukin 27 receptor, alpha"
Metap1d	3.4548037	66559	5.7876062	1.5823209	chr2	71291395	71363248	methionyl aminopeptidase type 1D (mitochondrial)
Olfr1396	3.4522972	258334	74.12218	20.27958	chr11	48926279	48927259	olfactory receptor 1396
Syp	3.4491026	20977	3.2888331	0.9006471	chrX	7215706	7230382	synaptophysin
Pth1r	3.4358926	19228	4.6021714	1.2651504	chr9	110624589	110649649	parathyroid hormone 1 receptor
Dcps	3.3992577	69305	35.002026	9.72586	chr9	34931999	34983572	"decapping enzyme, scavenger"
Pla2g7	3.3538775	27226	6.6877775	1.8834473	chr17	43705400	43749150	"phospholipase A2, group VII (platelet-activating factor acetylhydrolase, plasma)"
Cox16	3.3076098	66272	3.3122191	0.94585335	chr12	82460013	82586097	COX16 cytochrome c oxidase assembly homolog (S. cerevisiae)
Gstm7	3.3003588	68312	4.685891	1.341065	chr3	107729252	107734663	"glutathione S-transferase, mu 7"
Prss48	3.2935863	368202	5.3425226	1.5321324	chr3	85797732	85806413	"protease, serine, 48"
Tiam1	3.2776737	21844	19.274086	5.5542707	chr16	89787356	90144059	T cell lymphoma invasion and metastasis 1
Gm6213	3.2482276	621335	9.642441	2.8038805	chr8	40383334	40453622	predicted gene 6213
Ccdc80	3.2014241	67896	20.03024	5.909652	chr16	45093789	45128037	coiled-coil domain containing 80
Ankrd44	3.182123	329154	48.40502	14.367871	chr1	54702184	54983231	ankyrin repeat domain 44
Alas2	3.179502	11656	3.852185	1.1443714	chrX	146981960	147005165	"aminolevulinic acid synthase 2, erythroid"
Tyw3	3.1642013	209584	3.376048	1.0077748	chr3	154239484	154260062	tRNA-yW synthesizing protein 3 homolog (S. cerevisiae)
Gm4793	3.1489213	215714	3.730868	1.1190953	chr1	137481350	137496527	predicted gene 4793
Syt15	3.1485174	319508	15.63605	4.6907244	chr14	35033232	35043607	synaptotagmin XV
Gatm	3.1314244	67092	39.142677	11.806671	chr2	122420209	122437013	glycine amidinotransferase (L-arginine:glycine amidinotransferase)
Gm3364	3.130963	100041481	15.959825	4.8147	chr5	45092115	45098129	predicted gene 3364
Opn3	3.1267745	13603	8.9159565	2.6933348	chr1	177592559	177622721	opsin 3
Zfp458	3.126662	238690	4.542698	1.3723092	chr13	67355854	67379402	zinc finger protein 458
2810002D19Rik	3.126319	66457	5.387594	1.6277233	chr2	94246864	94251837	RIKEN cDNA 2810002D19 gene
Tmod4	3.121102	50874	3.171258	0.95971566	chr3	94928436	94933130	tropomodulin 4
Smtnl2	3.115898	276829	10.465784	3.1725428	chr11	72203616	72225215	smoothelin-like 2
Pygm	3.1125083	19309	4.6891217	1.4229833	chr19	6384429	6398459	muscle glycogen phosphorylase
Serpini1	3.1106799	20713	7.0547533	2.1421287	chr3	75361455	75446445	"serine (or cysteine) peptidase inhibitor, clade I, member 1"
Pcyox1l	3.0873888	240334	5.8776975	1.7981869	chr18	61856491	61867289	prenylcysteine oxidase 1 like
Adamtsl5	3.0856984	66548.chr10.2	22.942719	7.0228014	chr10	79803461	79811191	ADAMTS-like 5
Dapk1	3.0824354	69635	4.341045	1.3302071	chr13	60703308	60864547	death associated protein kinase 1
Zfp353	3.0809228	234203	94.46752	28.961473	chr8	43164627	43169733	zinc finger protein 353
Cmtm8	3.0538397	70031	36.105824	11.167344	chr9	114698463	114753279	CKLF-like MARVEL transmembrane domain containing 8
Tmem14a	3.027572	75712	5.0084715	1.5625346	chr1	21208712	21220248	transmembrane protein 14A
Klhdc8a	3.0272086	213417	8.980585	2.802085	chr1	134195203	134203934	kelch domain containing 8A
9530091C08Rik	3.0265844	320440	9.601444	2.9964204	chr9	68613153	68621129	RIKEN cDNA 9530091C08 gene
Mpped2	3.0035684	77015	21.40682	6.731836	chr2	106533616	106708517	metallophosphoesterase domain containing 2
Mir103-2	2.9867156	723825	24.834955	7.8539553	chr2	131113788	131113873	microRNA 103-2
Psd3	2.9841027	234353	19.711218	6.239055	chr8	70212981	70586185	pleckstrin and Sec7 domain containing 3
B3gntl1	2.977686	210004	5.5854316	1.7717273	chr11	121477522	121534465	"UDP-GlcNAc:betaGal beta-1,3-N-acetylglucosaminyltransferase-like 1"
1700003F17Rik	2.9724576	76392	6.631031	2.1070957	chr11	82755846	82774159	RIKEN cDNA 1700003F17 gene
Airn	2.9639606	104103	9.813262	3.1272295	chr17	12934177	13052750	antisense Igf2r RNA
Ptgr1	2.9496026	67103	3.4399612	1.101562	chr4	58978462	58999950	prostaglandin reductase 1
Lrrc3b	2.9490676	218763	36.819725	11.792747	chr14	16190031	16271501	leucine rich repeat containing 3B
St8sia4	2.9383962	20452	9.354276	3.006899	chr1	97484259	97564171	"ST8 alpha-N-acetyl-neuraminide alpha-2,8-sialyltransferase 4"
AI450353	2.9321744	103729	6.8551416	2.2082362	chr11	83106932	83108431	expressed sequence AI450353
Gm10653	2.914406	677044	5.3094673	1.7207578	chr9	62689284	62709831	ribsomal protein S2 pseudogene
Cabp1	2.911842	29867	11.30111	3.665829	chr5	115618700	115636130	calcium binding protein 1
Fam176a	2.911335	232146	5.764037	1.8700514	chr6	81991622	82043093	"family with sequence similarity 176, member A"
Meg3	2.908014	17263	5.679564	1.8447489	chr12	110779206	110809939	maternally expressed 3
Ldlr	2.905447	16835	17.309074	5.6270356	chr9	21528038	21554362	low density lipoprotein receptor
Fam174b	2.9012918	100038347	38.19382	12.434282	chr7	80885193	80921805	"family with sequence similarity 174, member B"
Cntfr	2.900638	12804	5.515489	1.7960125	chr4	41604529	41644123	ciliary neurotrophic factor receptor
B230217C12Rik	2.8942637	68127	4.834468	1.5777184	chr11	97702094	97704357	RIKEN cDNA B230217C12 gene
1600012F09Rik	2.892927	67008	28.17789	9.200045	chr13	18078474	18085185	RIKEN cDNA 1600012F09 gene
E030024N20Rik	2.890591	595139	9.52759	3.1132605	chr19	16238588	16244948	peptidylprolyl isomerase A pseudogene 8
Ankdd1b	2.8802283	271144	10.918447	3.5805748	chr13	97186089	97241115	ankyrin repeat and death domain containing 1B
3110035E14Rik	2.8697195	76982	4.4783473	1.4739987	chr1	9591348	9617223	RIKEN cDNA 3110035E14 gene
Ttll3	2.8653836	101100	4.0428286	1.3326664	chr6	113339254	113364565	"tubulin tyrosine ligase-like family, member 3"
4930512B01Rik	2.850998	74724	3.811291	1.2626827	chr12	70891331	70942867	RIKEN cDNA 4930512B01 gene
Kcnq1ot1	2.849161	63830	7.3476896	2.4358625	chr7	150399016	150482452	KCNQ1 overlapping transcript 1
D17H6S56E-3	2.8444724	27762	4.4214697	1.4681958	chr17	35153524	35163686	"DNA segment, Chr 17, human D6S56E 3"
Pln	2.8367343	18821	4.2960377	1.4304353	chr10	53057492	53065805	phospholamban
Gm20346	2.8350432	100504674	6.761369	2.2526505	chr9	62189310	62191841	"predicted gene, 20346"
Nfil3	2.823319	18030	11.029234	3.6898124	chr13	53062578	53076408	"nuclear factor, interleukin 3, regulated"
Stab2	2.8185463	192188	9.711952	3.25462	chr10	86303955	86470687	stabilin 2
Cstad	2.8095987	78617	4.133074	1.3894656	chr2	30450564	30464465	"CSA-conditional, T cell activation-dependent protein"
Tnfrsf18	2.7965198	21936	5.929043	2.00256	chr4	155400451	155403000	"tumor necrosis factor receptor superfamily, member 18"
Lcat	2.7713587	16816	6.890179	2.3483167	chr8	108463451	108467302	lecithin cholesterol acyltransferase
Hist1h4j	2.7702072	319159	4.4107156	1.5038888	chr13	21826965	21827276	"histone cluster 1, H4j"
Synm	2.7680905	233335	8.338234	2.8451993	chr7	74875047	74904628	"synemin, intermediate filament protein"
1700029I15Rik	2.7663212	75641	5.4878993	1.8737967	chr2	92223075	92223760	RIKEN cDNA 1700029I15 gene
D3Ertd751e	2.7656753	73852	3.392158	1.1584936	chr3	41546540	41562861	"DNA segment, Chr 3, ERATO Doi 751, expressed"
Gm9159	2.7561767	668415	13.174783	4.5149736	chrX	100740839	100743038	predicted gene 9159
Stmn2	2.7380176	20257	5.808082	2.003621	chr3	8509527	8561604	stathmin-like 2
Olfr613	2.7336464	259104	30.485867	10.533558	chr7	110698882	110704018	olfactory receptor 613
Capsl	2.732734	75568	4.770859	1.6489905	chr15	9365783	9395790	calcyphosine-like
Gm16982	2.73224	100036523	3.5910375	1.2414237	chr7	148795965	148799646	"predicted gene, 16982"
Phxr4	2.721289	18689	59.733604	20.73305	chr9	13234581	13235960	per-hexamer repeat gene 4
Zfp488	2.7210352	382867	135.9132	47.178757	chr14	34780256	34791950	zinc finger protein 488
Arap2	2.7120225	212285	40.676647	14.166772	chr5	62993685	63157416	"ArfGAP with RhoGAP domain, ankyrin repeat and PH domain 2"
Tmem45b	2.7076116	235135	4.7348723	1.6517365	chr9	31233781	31271823	transmembrane protein 45b
Rtn1	2.706156	104001	4.43496	1.5479457	chr12	73312739	73509926	reticulon 1
Klf12	2.7018197	16597	23.24904	8.127701	chr14	100269862	100683606	Kruppel-like factor 12
Slc26a11	2.701158	268512	5.841223	2.0425506	chr11	119216871	119242390	"solute carrier family 26, member 11"
Rasgrp2	2.6973984	19395	8.034131	2.813279	chr19	6400583	6415216	"RAS, guanyl releasing protein 2"
Stmn1-rs1	2.6863003	111186	4.259644	1.4977442	chr9	115190210	115191188	"stathmin 1, related sequence 1"
P2ry1	2.6857116	18441	110.85819	38.987675	chr3	60806717	60812904	"purinergic receptor P2Y, G-protein coupled 1"
Ddi1	2.682204	71829	4.206249	1.4812282	chr9	6265028	6266547	"DDI1, DNA-damage inducible 1, homolog 1 (S. cerevisiae)"
C920021L13Rik	2.6704764	100042889	9.077219	3.2105763	chr3	95675445	95693016	RIKEN cDNA C920021L13 gene
Tcp11l1	2.6631632	320554	3.351117	1.188532	chr2	104517496	104552319	t-complex 11 like 1
Gm11714	2.6595998	100503397	6.37343	2.2634754	chr11	107289590	107297000	predicted gene 11714
Gm9199	2.6574838	668489	11.37373	4.0425105	chr14	73425410	73426697	glycine cleavage system protein H (aminomethyl carrier) pseudogene
Snord17	2.6545596	100313519	6.7128067	2.388529	chr2	144091718	144091938	"small nucleolar RNA, C/D box 17"
Hmha1	2.642227	70719	23.355497	8.349068	chr10	79479417	79494216	histocompatibility (minor) HA-1
Lipt2	2.636032	67164	3.1148448	1.1161041	chr7	107307787	107309441	lipoyl(octanoyl) transferase 2 (putative)
Olfml2b	2.6344643	320078	22.648724	8.12027	chr1	172574663	172612920	olfactomedin-like 2B
BY080835	2.633746	434436	3.1986048	1.1471115	chr9	107495398	107499406	cDNA sequence BY080835
5730577I03Rik	2.6270056	66662	6.247107	2.246141	chr9	20411919	20421715	zinc finger protein pseudogene
Kptn	2.583736	70394	6.0629067	2.2164178	chr7	16705225	16712865	kaptin
8430431K14Rik	2.5803292	78103	5.659407	2.071642	chr19	31288033	31290886	RIKEN cDNA 8430431K14 gene
A630089N07Rik	2.5673416	320586	48.74987	17.935305	chr16	98222475	98303604	RIKEN cDNA A630089N07 gene
Pdia5	2.5632784	72599	51.659748	19.035984	chr16	35397398	35490959	protein disulfide isomerase associated 5
1700029G01Rik	2.561776	66938	20.00809	7.3770614	chr4	125827846	125840585	RIKEN cDNA 1700029G01 gene
Chml	2.5603945	12663	22.621666	8.3452	chr1	177612369	177618484	choroideremia-like
Ncald	2.5593522	52589	8.798901	3.2472618	chr15	37295930	37722183	neurocalcin delta
Gm3002	2.5505857	100040852	3.0125227	1.1156024	chr14	3920624	3936392	alpha-takusan pseudogene
Ng23	2.5406365	78376	21.696499	8.066146	chr17	35162920	35164961	Ng23 protein
Nos2	2.5393908	18126	11.959291	4.448308	chr11	78734361	78773626	"nitric oxide synthase 2, inducible"
Prkd1	2.5393002	18760	3.0495737	1.134342	chr12	51442219	51750210	protein kinase D1
6030422M02Rik	2.532892	240697	3.4617698	1.2909232	chr1	9898719	9931035	RIKEN cDNA 6030422M02 gene
4631423B10Rik	2.5312967	109292	7.2769723	2.7153547	chr6	114851925	114855164	RIKEN cDNA 4631423B10 gene
Vmn1r58	2.5301716	81014	29.21752	10.907176	chr7	5360492	5364747	vomeronasal 1 receptor 58
Hey1	2.5211728	15213	56.75038	21.261066	chr3	8663359	8667038	hairy/enhancer-of-split related with YRPW motif 1
Zfhx2	2.5195982	239102	7.150841	2.6806786	chr14	55680496	55710885	zinc finger homeobox 2
Lrrtm2	2.514688	107065	3.2118182	1.2063843	chr18	35368663	35374678	leucine rich repeat transmembrane neuronal 2
Sirt5	2.5117493	68346	5.7006445	2.143713	chr13	43460875	43490572	sirtuin 5 (silent mating type information regulation 2 homolog) 5 (S. cerevisiae)
Klk8	2.5091953	259277	29.92778	11.26572	chr7	51052947	51059192	kallikrein related-peptidase 8
Igfbp5	2.4992828	16011	2505.4563	946.87054	chr1	72904639	72921439	insulin-like growth factor binding protein 5
Ap1s3	2.4955401	252903	7.9518194	3.0096836	chr1	79603451	79668547	"adaptor-related protein complex AP-1, sigma 3"
E330033B04Rik	2.4924316	319722	4.5559316	1.7265246	chr15	96098995	96105706	RIKEN cDNA E330033B04 gene
9130206I24Rik	2.4920874	100040736	4.060171	1.5388631	chr4	114581894	114594572	RIKEN cDNA 9130206I24 gene
Ckb	2.4911954	12709	28.635565	10.857176	chr12	112907566	112910549	"creatine kinase, brain"
Odf3b	2.467871	70113	5.7672524	2.2073207	chr15	89207880	89209685	outer dense fiber of sperm tails 3B
9330151L19Rik	2.4664571	414085	3.2961051	1.262253	chr12	70298198	70300855	RIKEN cDNA 9330151L19 gene
Tbrg3	2.4607465	21378	6.5503955	2.5143135	chr15	82720913	82728891	transforming growth factor beta regulated gene 3
Msh5	2.4570115	17687	3.8139338	1.4661725	chr17	35165550	35183668	mutS homolog 5 (E. coli)
Afap1l2	2.4557173	226250	14.517104	5.583678	chr19	56986844	57083065	actin filament associated protein 1-like 2
Cd209c	2.4556386	170776	19.437414	7.476408	chr8	3940222	3946863	CD209c antigen
Arhgef25	2.4471822	52666	18.735933	7.2314925	chr10	126619577	126627110	Rho guanine nucleotide exchange factor (GEF) 25
Idi1	2.4465852	319554	9.865544	3.808725	chr13	8884852	8891642	isopentenyl-diphosphate delta isomerase
2310010M20Rik	2.4381785	69576	13.105917	5.077161	chr16	32271695	32274865	RIKEN cDNA 2310010M20 gene
Msi2	2.4319203	76626.chr11.2	3.8701506	1.5031333	chr11	88547268	88579581	Musashi homolog 2 (Drosophila)
Adamtsl2	2.4308996	77794	10.408723	4.044354	chr2	26934901	26964133	ADAMTS-like 2
1110021L09Rik	2.4152546	76306	9.72453	3.8029847	chr10	23516792	23547774	RIKEN cDNA 1110021L09 gene
4933400F21Rik	2.4093568	74403	3.5390015	1.3873899	chr1	91573082	91580467	RIKEN cDNA 4933400F21 gene
Gm11458	2.4085672	629777	3.9522693	1.5499109	chr2	164736854	164745453	predicted gene 11458
Chac1	2.4054716	69065	9.733467	3.8219628	chr2	119176978	119180062	"ChaC, cation transport regulator-like 1 (E. coli)"
Ldhb	2.4046345	16832	9.801406	3.8499773	chr6	142438769	142456463	lactate dehydrogenase B
Sc5d	2.3917627	235293	9.534484	3.765286	chr9	42062260	42072383	"sterol-C5-desaturase (fungal ERG3, delta-5-desaturase) homolog (S. cerevisae)"
B130055M24Rik	2.385812	654803	4.4497414	1.7616414	chr7	134592150	134604750	RIKEN cDNA B130055M24 gene
Slc18a2	2.3808696	214084	5.990516	2.376553	chr19	59335368	59370502	"solute carrier family 18 (vesicular monoamine), member 2"
Ddx26b	2.3746643	236790	25.6628	10.207531	chrX	53708016	53761020	DEAD/H (Asp-Glu-Ala-Asp/His) box polypeptide 26B
Dnahc2	2.371897	327954	3.5050275	1.3957723	chr11	69234311	69362610	"dynein, axonemal, heavy chain 2"
Kctd21	2.36898	622320	4.389336	1.750074	chr7	104480833	104498726	potassium channel tetramerisation domain containing 21
Tstd1	2.3686779	226654	6.0363173	2.4070497	chr1	173349164	173350483	thiosulfate sulfurtransferase (rhodanese)-like domain containing 1
Snora70	2.3663127	104368	11.353784	4.531974	chrX	71517831	71517959	"small nucleolar RNA, H/ACA box 70"
Fam101a	2.3625002	73121	50.523678	20.199564	chr5	125483845	125492917	"family with sequence similarity 101, member A"
Slc22a8	2.3553102	19879	4.872467	1.9539771	chr19	8665744	8686325	"solute carrier family 22 (organic anion transporter), member 8"
Fam196a	2.3546736	627214	7.650094	3.0687046	chr7	142073591	142130113	"family with sequence similarity 196, member A"
3110099E03Rik	2.353136	100043232	14.925004	5.990822	chr2	115319249	115337937	RIKEN cDNA 3110099E03 gene
Utp14b	2.3521938	195434	3.2123315	1.28993	chr1	78654400	78664176	"UTP14, U3 small nucleolar ribonucleoprotein, homolog B (yeast)"
Josd2	2.3500707	66124	16.258238	6.534485	chr7	51723426	51727021	Josephin domain containing 2
BC048355	2.3453946	381101	4.6236925	1.8620526	chr17	46633738	46636567	cDNA sequence BC048355
Slc22a17	2.3435628	59049	5.378194	2.1675985	chr14	55525141	55531969	"solute carrier family 22 (organic cation transporter), member 17"
Gstt3	2.3368561	103140	3.6587694	1.4788425	chr10	75236867	75244159	"glutathione S-transferase, theta 3"
Pcdhga11	2.333407	93723	5.1241603	2.0742018	chr18	37915427	38001526	"protocadherin gamma subfamily A, 11"
Samd12	2.333126	320679	42.87618	17.35788	chr15	53293356	53734092	sterile alpha motif domain containing 12
Gm19395	2.3313787	100502820	5.551894	2.2492998	chr10	53000087	53003492	"predicted gene, 19395"
Gm20309	2.3295662	100504603	26.63291	10.798476	chr1	60540347	60542727	"predicted gene, 20309"
Nrp1	2.3213098	18186	301.8528	122.823326	chr8	130882973	131029375	neuropilin 1
Rnf157	2.3158169	217340	29.807646	12.157443	chr11	116197659	116274346	ring finger protein 157
E330020D12Rik	2.3148863	626058	15.971779	6.5169225	chr1	155251316	155261363	Riken cDNA E330020D12 gene
Enox	2.308546	70252	5.9773045	2.4456012	chrX	100688915	100701764	expressed neighbor of Xist
Spc25	2.306339	66442	4.0399494	1.6545185	chr2	69031952	69044247	"SPC25, NDC80 kinetochore complex component, homolog (S. cerevisiae)"
Bcl7c	2.29982	12055	3.4422898	1.41375	chr7	134848492	134852280	B cell CLL/lymphoma 7C
4930486L24Rik	2.2967176	214639	5.26564	2.1655214	chr13	60943973	60965777	RIKEN cDNA 4930486L24 gene
Slc26a10	2.2900698	216441	122.69902	50.60707	chr10	126609482	126617701	"solute carrier family 26, member 10"
Gm6654	2.2842755	626175	4.0640864	1.6804805	chr6	146595672	146596324	predicted pseudogene 6654
Kcnj5	2.2805543	16521	89.268364	36.972275	chr9	32122368	32151822	"potassium inwardly-rectifying channel, subfamily J, member 5"
Rpph1	2.2755547	85029	133.62518	55.46515	chr14	51427122	51427446	ribonuclease P RNA component H1
Rasgrf2	2.2670476	19418.chr13.2	9.32325	3.8844159	chr13	92020012	92901449	RAS protein-specific guanine nucleotide-releasing factor 2
Snapc3	2.2662947	77634.chr4.2	9.354852	3.8988771	chr4	83109829	83113123	"small nuclear RNA activating complex, polypeptide 3"
9430015G10Rik	2.2623463	230996	4.0853224	1.7056352	chr4	155484107	155501372	RIKEN cDNA 9430015G10 gene
Tlcd2	2.2490933	380712	11.658004	4.8959365	chr11	75281581	75284146	TLC domain containing 2
Krt80	2.2479079	74127	14.46536	6.078126	chr15	101177875	101200556	keratin 80
Zdhhc14	2.2452972	224454	10.859031	4.5681057	chr17	5492600	5753891	"zinc finger, DHHC domain containing 14"
Usp11	2.2260025	236733	4.7384377	2.0106132	chrX	20281035	20297665	ubiquitin specific peptidase 11
Meis2	2.2239463	17536	169.9429	72.17681	chr2	115687000	115890794	Meis homeobox 2
Mapt	2.2233362	17762	32.411118	13.769172	chr11	104092750	104193407	microtubule-associated protein tau
Gm17546	2.2214088	100502979	3.8972585	1.6571037	chr15	95654889	95660503	"predicted gene, 17546"
G530011O06Rik	2.209371	654820	12.724469	5.4398894	chrX	166412975	166416849	RIKEN cDNA G530011O06 gene
6530402F18Rik	2.2041736	76220	5.2493534	2.2494638	chr2	29098758	29107560	RIKEN cDNA 6530402F18 gene
Syne1	2.2021942	64009	73.069084	31.339851	chr10	4795059	5326342	synaptic nuclear envelope 1
Cyp4f13	2.1993065	170716	12.33693	5.2983437	chr17	33061633	33084306	"cytochrome P450, family 4, subfamily f, polypeptide 13"
Ppp1r12b	2.1972613	329251.chr1.2	6.7602115	2.9060133	chr1	136676300	136700175	"protein phosphatase 1, regulatory (inhibitor) subunit 12B"
Birc5	2.1958413	11799	3.6052947	1.5508107	chr11	117710551	117717057	baculoviral IAP repeat-containing 5
Nedd4l	2.1934295	83814	3.3086073	1.424756	chr18	65047410	65377480	"neural precursor cell expressed, developmentally down-regulated gene 4-like"
Mthfsd	2.1920125	234814	4.168915	1.7963831	chr8	123621457	123632279	methenyltetrahydrofolate synthetase domain containing
Dmpk	2.1891258	13400	3.7400637	1.6137161	chr7	19669198	19679169	dystrophia myotonica-protein kinase
9930012K11Rik	2.1886919	268759	6.98129	3.012797	chr14	70554212	70559309	RIKEN cDNA 9930012K11 gene
Mcee	2.187996	73724	21.727966	9.379753	chr7	71537657	71557005	methylmalonyl CoA epimerase
Ctla2b	2.1814148	13025	56.36431	24.405342	chr13	60996712	60998808	cytotoxic T lymphocyte-associated protein 2 beta
Hyi	2.1785257	68180	4.7066436	2.0406456	chr4	118032619	118035349	hydroxypyruvate isomerase homolog (E. coli)
Serp2	2.1667666	72661	6.683689	2.913554	chr14	76932619	76956696	stress-associated endoplasmic reticulum protein family member 2
4930519F09Rik	2.1645405	114676	16.346802	7.133228	chr10	28641769	28643313	pyruvate dehydrogenase E1 alpha 1 pseudogene
6330407A03Rik	2.1622818	70720	5.4863124	2.3965538	chr4	3642111	3643953	RIKEN cDNA 6330407A03 gene
Fam55b	2.16119	78252	5.5437307	2.4228587	chr9	48126087	48148981	"family with sequence similarity 55, member B"
Gm6300	2.1610487	622229	9.851812	4.3059654	chr3	14363210	14377566	"solute carrier family 7 (cationic amino acid transporter, y+ system), member pseudogene"
Maged2	2.1609643	80884	65.52922	28.642187	chrX	147240964	147248882	"melanoma antigen, family D, 2"
Slc16a13	2.1601918	69309	12.325595	5.3893256	chr11	70030294	70034496	"solute carrier family 16 (monocarboxylic acid transporters), member 13"
Chrm3	2.159395	12671	15.710493	6.8718977	chr13	9875859	10360049	"cholinergic receptor, muscarinic 3, cardiac"
Dhcr24	2.156006	74754	19.19651	8.40991	chr4	106233643	106261718	24-dehydrocholesterol reductase
Il1f9	2.1531968	215257	10.082087	4.4226823	chr2	24041996	24049087	"interleukin 1 family, member 9"
Btnl9	2.1513379	237754	52.694103	23.135149	chr11	48981827	49000591	butyrophilin-like 9
4930511M06Rik	2.146924	75084	7.205047	3.1698534	chr18	57705015	57712051	RIKEN cDNA 4930511M06 gene
C530050E15Rik	2.1450472	320489	4.848783	2.1350827	chr13	24723787	24730436	RIKEN cDNA C530050E15 gene
Msrb2	2.1450138	76467	9.802856	4.3165965	chr2	19293263	19316597	methionine sulfoxide reductase B2
Impdh1	2.1430686	23917	69.9549	30.831951	chr6	29150440	29166350	inosine 5'-phosphate dehydrogenase 1
BC043934	2.141653	270185	3.3310049	1.4690788	chr9	96336202	96338458	cDNA sequence BC043934
Myo1e	2.138731	71602	58.65427	25.903742	chr9	70055157	70247874	myosin IE
Fam82b	2.13788	66302	4.319665	1.908472	chr4	19502214	19534079	"family with sequence similarity 82, member B"
Kcnrg	2.1337194	328424	5.4801755	2.4259183	chr14	62226294	62231670	potassium channel regulator
Zfp277	2.1233425	246196	111.58948	49.638878	chr12	41041633	41172377	zinc finger protein 277
Pcp4l1	2.1219575	66425	18.12208	8.066592	chr1	173103395	173127166	Purkinje cell protein 4-like 1
Pttg1	2.1212115	30939	21.876827	9.741349	chr11	43233750	43239750	pituitary tumor-transforming gene 1
Mettl8	2.1208665	228019	4.186717	1.864572	chr2	70802620	70893663	methyltransferase like 8
Spice1	2.1208553	212514	5.8716574	2.6149812	chr16	44347514	44388605	spindle and centriole associated protein 1
Cysltr2	2.120657	70086	12.327511	5.490653	chr14	73428935	73448921	cysteinyl leukotriene receptor 2
Dcdc2c	2.1191583	68511	61.053112	27.212187	chr12	29122660	29233202	doublecortin domain containing 2C
Psg23	2.1162121	56868	5.5442986	2.474607	chr7	19191692	19201850	pregnancy-specific glycoprotein 23
Fdft1	2.1124394	14137	9.126066	4.0805473	chr14	63763988	63798415	farnesyl diphosphate farnesyl transferase 1
6720456H20Rik	2.1116168	218989	6.0518107	2.7070072	chr14	49065803	49134834	RIKEN cDNA 6720456H20 gene
Prkg1	2.1069489	19091.chr19.2	5.0756936	2.275414	chr19	30642041	31839523	"protein kinase, cGMP-dependent, type I"
Gm17821	2.1060004	100316870	22.136192	9.928036	chr12	68757729	68770258	DDB1 and CUL4 associated factor 5 pseudogene
Nup210	2.101045	54563	9.4568815	4.251395	chr6	90963061	91066820	nucleoporin 210
Lss	2.1002908	16987	3.1460986	1.4148548	chr10	75994372	76016679	lanosterol synthase
Dusp19	2.099952	68082	5.198202	2.338098	chr2	80457371	80471818	dual specificity phosphatase 19
Nuf2	2.0994918	66977	3.6162117	1.6268914	chr1	171428065	171461595	"NUF2, NDC80 kinetochore complex component, homolog (S. cerevisiae)"
Sqle	2.0961354	20775	14.208184	6.4023314	chr15	59146647	59162748	squalene epoxidase
Intu	2.0922716	380614	6.3635874	2.8727837	chr3	40430208	40508662	inturned planar cell polarity effector homolog (Drosophila)
1600002K03Rik	2.092031	69770	5.793345	2.615653	chr10	79635689	79637864	RIKEN cDNA 1600002K03 gene
Beta-s	2.0885234	100503605	34.695503	15.691074	chr7	110975037	110976442	hemoglobin subunit beta-1-like
Pram1	2.0882494	378460	4.1328516	1.8693315	chr17	33767704	33782651	PML-RAR alpha-regulated adaptor molecule 1
Dera	2.086679	232449	3.8816805	1.7570455	chr6	137703098	137786393	2-deoxyribose-5-phosphate aldolase homolog (C. elegans)
Lrmp	2.0859487	16970	4.38858	1.9871894	chr6	145064156	145123448	lymphoid-restricted membrane protein
Zfp71-rs1	2.0859315	235907	12.865688	5.8257494	chr13	67806243	67830110	"zinc finger protein 71, related sequence"
Adam12	2.0843093	11489	22.161913	10.043016	chr7	141074883	141423814	a disintegrin and metallopeptidase domain 12 (meltrin alpha)
2810021B07Rik	2.08302	66308	10.245923	4.6459703	chr13	17787247	17790939	RIKEN cDNA 2810021B07 gene
Gm10791	2.0806627	100038614	7.4229593	3.3697224	chr16	84972456	84979696	predicted gene 10791
Gm19976	2.0731282	100503938	3.9859695	1.8160453	chr11	120210038	120212504	"predicted gene, 19976"
Glt25d2	2.0706794	269132	52.90895	24.134336	chr1	154246997	154357825	glycosyltransferase 25 domain containing 2
Tmem80	2.0682478	71448	5.897301	2.693206	chr7	148514029	148523054	transmembrane protein 80
Snhg7	2.0679348	72091	3.7533166	1.7143415	chr2	26492696	26495764	small nucleolar RNA host gene (non-protein coding) 7
Gm5901	2.0675554	100503879	4.2799563	1.9552443	chr7	112523612	112526801	predicted gene 5901
Gm6402	2.0663865	623169	4.781696	2.1856937	chr17	30531770	30533125	ribosomal protein S17 pseudogene
Gm19408	2.0660894	100502843	6.1469007	2.810128	chr19	4742913	4811634	"predicted gene, 19408"
Gal3st3	2.0642192	545276	4.3106494	1.9724493	chr19	5298331	5308739	galactose-3-O-sulfotransferase 3
Rnf24	2.0641358	51902	9.234209	4.2255225	chr2	131124224	131178628	ring finger protein 24
Kank4	2.0629683	242553	32.94396	15.083502	chr4	98421583	98484228	KN motif and ankyrin repeat domains 4
Accs	2.0595584	329470	8.528925	3.9114625	chr2	93675610	93690014	1-aminocyclopropane-1-carboxylate synthase homolog (Arabidopsis)(non-functional)
Pik3r6	2.0589805	104709	12.844912	5.892477	chr11	68316521	68366200	"phosphoinositide-3-kinase, regulatory subunit 6"
Fam38b	2.0578308	667742	25.67009	11.782473	chr18	63169867	63546837	"family with sequence similarity 38, member B"
Atp8a1	2.0577397	11980	31.594133	14.502236	chr5	68009380	68238670	"ATPase, aminophospholipid transporter (APLT), class I, type 8A, member 1"
Lamb1	2.0568027	16777	13.182517	6.053752	chr12	31950159	32014504	laminin B1
Kctd14	2.0551703	233529	8.61332	3.9586003	chr7	104599844	104608067	potassium channel tetramerisation domain containing 14
Hbegf	2.053454	15200	29.816025	13.714622	chr18	36664581	36675459	heparin-binding EGF-like growth factor
Blk	2.0527244	12143	3.7953017	1.7463628	chr14	63991674	64036024	B lymphoid kinase
Pcdhb4	2.048284	93875	3.6682212	1.691547	chr18	37467109	37470827	protocadherin beta 4
Fbxl19	2.0464888	233902	4.6885753	2.163966	chr7	134890289	134912442	F-box and leucine-rich repeat protein 19
Phlda1	2.0455527	21664	24.329607	11.23423	chr10	110943342	110945705	"pleckstrin homology-like domain, family A, member 1"
Hbb-b1	2.0434957	15129	116.95138	54.056828	chr7	110961038	110962437	"hemoglobin, beta adult major chain"
Rem1	2.04305	19700	8.556639	3.9558794	chr2	152452744	152463732	rad and gem related GTP binding protein 1
Trim68	2.0422163	101700	6.453737	2.984892	chr7	109826094	109835840	tripartite motif-containing 68
Akr1b10	2.04159	67861	3.9609187	1.8325104	chr6	34334247	34346949	"aldo-keto reductase family 1, member B10 (aldose reductase)"
Bin1	2.0397222	30948	16.464455	7.624216	chr18	32536871	32595394	bridging integrator 1
B430010I23Rik	2.0382302	78849	8.257643	3.8266778	chr8	42102822	42109570	RIKEN cDNA B430010I23 gene
Csf1	2.0371137	12977	72.65134	33.68584	chr3	107543966	107563387	colony stimulating factor 1 (macrophage)
Rapgef4	2.0368376	56508	18.525837	8.590933	chr2	71819272	72095531	Rap guanine nucleotide exchange factor (GEF) 4
C430048L16Rik	2.0354397	77604	6.4902954	3.0117917	chr4	12016517	12023418	RIKEN cDNA C430048L16 gene
Slc45a4	2.03284	106068	14.379141	6.681112	chr15	73410721	73455174	"solute carrier family 45, member 4"
Fdps	2.0326223	110196	12.014808	5.583147	chr3	88897510	88905867	farnesyl diphosphate synthetase
Mecr	2.030832	26922	5.0065703	2.3285477	chr4	131399386	131423702	mitochondrial trans-2-enoyl-CoA reductase
Cdc14a	2.0300736	229776	35.554825	16.54268	chr3	115975471	116126950	CDC14 cell division cycle 14 homolog A (S. cerevisiae)
Zfp692	2.0279794	103836	7.10785	3.3105016	chr11	58120571	58128115	zinc finger protein 692
Acss1	2.0257463	68738	6.208295	2.894717	chr2	150443847	150493976	acyl-CoA synthetase short-chain family member 1
Plk1s1	2.0250983	228730	15.310727	7.141158	chr2	146681625	146795825	polo-like kinase 1 substrate 1
Atg16l2	2.0233402	73683	7.460638	3.4827807	chr7	108438130	108450602	autophagy related 16 like 2 (S. cerevisiae)
B4galnt1	2.023009	14421	6.706645	3.131313	chr10	126602281	126609386	"beta-1,4-N-acetyl-galactosaminyl transferase 1"
Ppm1h	2.0187764	319468	3.849094	1.800898	chr10	122115818	122382849	protein phosphatase 1H (PP2C domain containing)
Rian	2.0148754	75745	5.9807897	2.8036845	chr12	110842155	110899921	RNA imprinted and accumulated in nucleus
St3gal6	2.0123758	54613	17.767519	8.339435	chr16	58470655	58524359	"ST3 beta-galactoside alpha-2,3-sialyltransferase 6"
Sox4	2.0022566	20677	14.516176	6.8478084	chr13	29042599	29045551	SRY-box containing gene 4
Tgfa	2.001431	21802	3.443417	1.625054	chr6	86145245	86225443	transforming growth factor alpha
