# Supplementary material for: Pathogenic pathways are activated in each major cell type of the glomerulus in the Cd2ap mutant mouse model of focal segmental glomerulosclerosis
Source: BMC Nephrol. 2015 May 13;16:71. doi: 10.1186/s12882-015-0063-z (PMC4430919; doi:10.1186/s12882-015-0063-z)
Supplement: Additional file 17: Table S17. — Functional enrichment analysis of genes with higher expression in wild type endothelial cells compared to Cd2ap mutant. Columns show functional category (molecular function or biological process), name of function, uncorrected P-value, FDR Benjamini and Hochberg corrected P value, Hit count in gene list, Hit count in genome, Genes with hit in gene list. [file 12882_2015_63_MOESM17_ESM.xls]

Category	Name	p-value	q-value FDR B&H	Hit Count in Query List	Hit Count in Genome	Hit in Query List
GO: Molecular Function	double-stranded RNA binding	2.44E-06	1.73E-03	8	55	"DHX58,ACTN1,OAS2,OAS1,SLC3A2,VIM,DDX60,OASL"
GO: Molecular Function	peptide antigen binding	5.50E-06	1.83E-03	6	29	"HLA-E,HLA-DRB5,HLA-DQB1,HLA-DQA1,HLA-A,TAP1"
GO: Molecular Function	extracellular matrix binding	7.75E-06	1.83E-03	7	46	"FBLN2,GPR56,BGN,TINAGL1,CYR61,LGALS1,ELN"
GO: Molecular Function	2'-5'-oligoadenylate synthetase activity	1.59E-05	2.82E-03	3	4	"OAS2,OAS1,OASL"
GO: Molecular Function	insulin-like growth factor binding	4.11E-05	5.81E-03	5	25	"CRIM1,IGFBP3,CYR61,CTGF,ESM1"
GO: Molecular Function	receptor binding	5.26E-05	6.20E-03	41	1350	"IL33,ACE,PPARG,GJA1,DAXX,ACTN1,HMGA1,ITGB3,ITGA1,BMP4,SERPINE1,P2RY2,CXCL10,INHBB,HLA-E,IL15,APLN,F2R,HLA-A,VCAM1,EDN1,ANGPT2,UCHL1,MDK,PDGFB,PDGFA,APOE,CXCL12,IGF2,NPNT,CYR61,SEMA7A,TAP1,CTGF,TACC2,SEMA6B,NMB,OASL,STAT1,CD74,SERPINE2"
GO: Molecular Function	core promoter sequence-specific DNA binding	1.10E-04	9.84E-03	6	48	"IRF7,NLRC5,NR1D2,NR1D1,EGR1,STAT1"
GO: Molecular Function	GTPase activity	1.24E-04	9.84E-03	13	238	"TUBB6,IRGM,RASD1,MX2,GEM,GBP2,GBP3,EHD4,GBP5,GBP4,GBP6,GBP7,RHOB"
GO: Molecular Function	extracellular matrix structural constituent	1.25E-04	9.84E-03	7	70	"FBLN2,BGN,TINAGL1,COL4A1,COL4A2,MGP,ELN"
GO: Molecular Function	RNA polymerase II regulatory region DNA binding	1.71E-04	1.21E-02	9	124	"PPARG,DBP,JUNB,KLF9,IRF7,NLRC5,PER1,EGR1,STAT1"
GO: Molecular Function	integrin binding	1.88E-04	1.21E-02	8	99	"ACTN1,ITGB3,ITGA1,VCAM1,NPNT,CYR61,SEMA7A,CTGF"
GO: Molecular Function	bombesin receptor binding	2.54E-04	1.50E-02	2	2	"EDN1,NMB"
GO: Molecular Function	identical protein binding	3.26E-04	1.67E-02	34	1138	"B2M,THRSP,DAXX,COL18A1,ACTN1,BCL2L1,BST2,ITGB3,BMP4,XDH,KLHL7,ABCG2,INHBB,TEF,PLVAP,VIM,NR2F2,GBP5,ZNF423,S100A6,PDGFB,C1QTNF6,PDGFA,APOE,TAP1,TYROBP,STOM,LGALS1,IFIT3,ZBTB16,CDH13,GSTA4,STAT1,CD74"
GO: Molecular Function	protein homodimerization activity	3.40E-04	1.67E-02	24	694	"THRSP,DAXX,ACTN1,BCL2L1,BST2,BMP4,XDH,KLHL7,ABCG2,INHBB,TEF,PLVAP,NR2F2,ZNF423,S100A6,PDGFB,PDGFA,APOE,TAP1,LGALS1,ZBTB16,CDH13,GSTA4,STAT1"
GO: Molecular Function	transcription regulatory region sequence-specific DNA binding	3.54E-04	1.67E-02	11	198	"DBP,JUNB,KLF9,IRF7,NLRC5,NR1D2,MYC,PER1,NR1D1,EGR1,STAT1"
GO: Molecular Function	RNA polymerase II regulatory region sequence-specific DNA binding	5.20E-04	2.19E-02	8	115	"DBP,JUNB,KLF9,IRF7,NLRC5,PER1,EGR1,STAT1"
GO: Molecular Function	protein dimerization activity	5.27E-04	2.19E-02	33	1122	"THRSP,DAXX,ACTN1,CYBB,BCL2L1,BST2,ITGA1,BMP4,XDH,PAFAH1B3,KLHL7,ABCG2,INHBB,TEF,PLVAP,NR2F2,HLA-DQB1,HLA-DQA1,HLA-A,MYC,ZNF423,LTC4S,S100A6,PDGFB,PDGFA,APOE,TAP1,JDP2,LGALS1,ZBTB16,CDH13,GSTA4,STAT1"
GO: Molecular Function	protein kinase regulator activity	6.53E-04	2.43E-02	8	119	"CDKN1A,CKS1B,RGCC,CXCL10,SOCS3,IGF2,CCNY,ITPRIP"
GO: Molecular Function	growth factor binding	6.53E-04	2.43E-02	8	119	"CRIM1,PDGFB,PDGFA,COL4A1,IGFBP3,CYR61,CTGF,ESM1"
GO: Molecular Function	platelet-derived growth factor binding	7.97E-04	2.82E-02	3	12	"PDGFB,PDGFA,COL4A1"
GO: Molecular Function	double-stranded DNA binding	1.01E-03	3.40E-02	9	158	"JUNB,TEF,MYC,DDX60,JDP2,IFI16,ZBTB16,EGR1,STAT1"
GO: Molecular Function	direct ligand regulated sequence-specific DNA binding transcription factor activity	1.18E-03	3.64E-02	5	50	"PPARG,NR2F6,NR1D2,NR2F2,NR1D1"
GO: Molecular Function	ligand-activated sequence-specific DNA binding RNA polymerase II transcription factor activity	1.18E-03	3.64E-02	5	50	"PPARG,NR2F6,NR1D2,NR2F2,NR1D1"
GO: Molecular Function	RNA polymerase II core promoter sequence-specific DNA binding	1.43E-03	4.21E-02	4	31	"IRF7,NLRC5,EGR1,STAT1"
GO: Molecular Function	sulfur compound binding	1.56E-03	4.39E-02	10	202	"GPC3,SLC6A6,BMP4,LTC4S,MDK,APOE,CYR61,CTGF,FN1,SERPINE2"
GO: Molecular Function	core promoter binding	1.65E-03	4.39E-02	6	79	"IRF7,NLRC5,NR1D2,NR1D1,EGR1,STAT1"
GO: Molecular Function	steroid hormone receptor activity	1.68E-03	4.39E-02	5	54	"PPARG,NR2F6,NR1D2,NR2F2,NR1D1"
GO: Molecular Function	sequence-specific DNA binding	1.90E-03	4.72E-02	23	741	"PPARG,DBP,HOXB9,HOXD8,IRX3,JUNB,KLF9,HMGA1,NR2F6,IRF7,NLRC5,NR1D2,TEF,NR2F2,MYC,ZNF423,PER1,NR1D1,JDP2,MAFF,EGR1,LHX6,STAT1"
GO: Molecular Function	platelet-derived growth factor receptor binding	1.94E-03	4.72E-02	3	16	"ITGB3,PDGFB,PDGFA"
GO: Molecular Function	kinase regulator activity	2.04E-03	4.81E-02	8	142	"CDKN1A,CKS1B,RGCC,CXCL10,SOCS3,IGF2,CCNY,ITPRIP"
GO: Molecular Function	collagen binding	2.14E-03	4.87E-02	5	57	"GPR56,ITGA1,PDGFB,PDGFA,FN1"
GO: Molecular Function	peptide binding	2.39E-03	5.28E-02	10	214	"ACE,HLA-E,HLA-DRB5,HLA-DQB1,HLA-DQA1,HLA-A,LTC4S,APOE,TAP1,CD74"
GO: Molecular Function	GTP binding	2.62E-03	5.61E-02	14	370	"TGM2,TUBB6,IRGM,RASD1,MX2,GEM,GBP2,GBP3,EHD4,GBP5,GBP4,GBP6,GBP7,RHOB"
GO: Molecular Function	14-3-3 protein binding	2.76E-03	5.73E-02	3	18	"SIK1,ZFP36,DDIT4"
GO: Molecular Function	amide binding	3.21E-03	6.49E-02	10	223	"ACE,HLA-E,HLA-DRB5,HLA-DQB1,HLA-DQA1,HLA-A,LTC4S,APOE,TAP1,CD74"
GO: Molecular Function	antigen binding	3.38E-03	6.64E-02	6	91	"HLA-E,HLA-DRB5,HLA-DQB1,HLA-DQA1,HLA-A,TAP1"
GO: Molecular Function	enzyme regulator activity	3.62E-03	6.91E-02	25	874	"SERPINA3,GPC3,TIMP1,CHN2,CDKN1A,BCL2L1,BST2,SERPINE1,CKS1B,RGCC,CXCL10,ERRFI1,LTC4S,CRIM1,PDGFB,SOCS3,APOE,IGF2,IGFBP3,CCNY,ARHGDIB,ITPRIP,FN1,MMP17,SERPINE2"
GO: Molecular Function	guanyl ribonucleotide binding	4.18E-03	7.59E-02	14	390	"TGM2,TUBB6,IRGM,RASD1,MX2,GEM,GBP2,GBP3,EHD4,GBP5,GBP4,GBP6,GBP7,RHOB"
GO: Molecular Function	guanyl nucleotide binding	4.18E-03	7.59E-02	14	390	"TGM2,TUBB6,IRGM,RASD1,MX2,GEM,GBP2,GBP3,EHD4,GBP5,GBP4,GBP6,GBP7,RHOB"
GO: Molecular Function	protein heterodimerization activity	4.39E-03	7.76E-02	16	477	"CYBB,BCL2L1,ITGA1,PAFAH1B3,TEF,HLA-DQB1,HLA-DQA1,HLA-A,MYC,ZNF423,LTC4S,PDGFB,PDGFA,APOE,TAP1,JDP2"
GO: Molecular Function	adenylyltransferase activity	4.96E-03	8.33E-02	3	22	"OAS2,OAS1,OASL"
GO: Molecular Function	cyclin-dependent protein serine/threonine kinase regulator activity	4.96E-03	8.33E-02	3	22	"CDKN1A,CKS1B,CCNY"
GO: Molecular Function	oligosaccharide binding	5.06E-03	8.33E-02	2	7	"SELE,LGALS1"
GO: Molecular Function	neutral amino acid transmembrane transporter activity	5.64E-03	8.73E-02	3	23	"SLC6A6,SLC1A5,SLC3A2"
GO: Molecular Function	fibronectin binding	5.64E-03	8.73E-02	3	23	"IGFBP3,CTGF,MMP2"
GO: Molecular Function	growth factor activity	5.68E-03	8.73E-02	8	168	"BMP4,INHBB,MDK,PDGFB,PDGFA,CXCL12,IGF2,CTGF"
GO: Molecular Function	peptidase inhibitor activity	6.30E-03	9.38E-02	8	171	"SERPINA3,GPC3,TIMP1,BCL2L1,BST2,SERPINE1,CRIM1,SERPINE2"
GO: Molecular Function	neuropeptide receptor binding	6.37E-03	9.38E-02	3	24	"APLN,EDN1,NMB"
GO: Molecular Function	thyroid hormone receptor activity	6.68E-03	9.45E-02	2	8	"NR2F6,NR1D2"
GO: Molecular Function	death domain binding	6.68E-03	9.45E-02	2	8	"DAP,BCL2L1"
GO: Molecular Function	peptidase regulator activity	7.20E-03	9.98E-02	9	212	"SERPINA3,GPC3,TIMP1,BCL2L1,BST2,SERPINE1,CRIM1,FN1,SERPINE2"
GO: Molecular Function	structure-specific DNA binding	7.49E-03	1.00E-01	10	252	"JUNB,TEF,MYC,DDX60,JDP2,IFI16,ZBTB16,EGR1,CRY2,STAT1"
GO: Molecular Function	transition metal ion binding	7.51E-03	1.00E-01	36	1480	"ACE,KDM5D,PPARG,JADE2,DHX58,DBH,PHF11,OAS2,OAS1,ADA,TRAFD1,RNF213,NR2F6,XDH,MT1H,CA8,NR1D2,NR2F2,FBLIM1,XAF1,S100A6,CH25H,ADAMTS6,DDAH1,NR1D1,CYP26B1,RNF144B,FN1,ZSWIM7,MMP17,PIM1,DTX3L,LHX6,PDLIM1,MYRIP,MMP2"
GO: Molecular Function	protein-lipid complex binding	7.99E-03	1.03E-01	3	26	"GPIHBP1,APOE,CDH13"
GO: Molecular Function	lipoprotein particle binding	7.99E-03	1.03E-01	3	26	"GPIHBP1,APOE,CDH13"
GO: Molecular Function	heparin binding	8.79E-03	1.11E-01	7	145	"BMP4,MDK,APOE,CYR61,CTGF,FN1,SERPINE2"
GO: Molecular Function	organic acid:sodium symporter activity	9.84E-03	1.20E-01	3	28	"SLC10A6,SLC6A6,SLC1A5"
GO: Molecular Function	outward rectifier potassium channel activity	1.05E-02	1.20E-01	2	10	"KCNB1,KCND3"
GO: Molecular Function	CXCR chemokine receptor binding	1.05E-02	1.20E-01	2	10	"CXCL10,CXCL12"
GO: Molecular Function	filamin binding	1.05E-02	1.20E-01	2	10	"FAM101B,FBLIM1"
GO: Molecular Function	G-protein coupled receptor binding	1.10E-02	1.20E-01	9	227	"ACE,P2RY2,CXCL10,APLN,EDN1,UCHL1,CXCL12,NMB,STAT1"
GO: Molecular Function	sequence-specific DNA binding RNA polymerase II transcription factor activity	1.17E-02	1.20E-01	11	311	"PPARG,DBP,KLF9,HMGA1,NR2F6,IRF7,NR1D2,NR2F2,NR1D1,EGR1,STAT1"
GO: Molecular Function	glycosaminoglycan binding	1.26E-02	1.20E-01	8	193	"BGN,BMP4,MDK,APOE,CYR61,CTGF,FN1,SERPINE2"
GO: Molecular Function	nucleoside-triphosphatase activity	1.33E-02	1.20E-01	21	776	"ABCA1,DHX58,RNF213,TUBB6,IRGM,RASD1,MX2,ABCG2,GEM,GBP2,GBP3,EHD4,GBP5,GBP4,DDX60,GBP6,GBP7,TAP1,ENTPD1,RHOB,CGNL1"
GO: Molecular Function	zinc ion binding	1.39E-02	1.20E-01	30	1231	"ACE,KDM5D,PPARG,JADE2,DHX58,PHF11,OAS2,OAS1,ADA,TRAFD1,RNF213,NR2F6,MT1H,CA8,NR1D2,NR2F2,FBLIM1,XAF1,S100A6,ADAMTS6,DDAH1,NR1D1,RNF144B,ZSWIM7,MMP17,DTX3L,LHX6,PDLIM1,MYRIP,MMP2"
GO: Molecular Function	MHC class II receptor activity	1.51E-02	1.20E-01	2	12	"HLA-DQB1,HLA-DQA1"
GO: Molecular Function	macrophage migration inhibitory factor binding	1.60E-02	1.20E-01	1	1	CD74
GO: Molecular Function	ISG15-specific protease activity	1.60E-02	1.20E-01	1	1	USP18
GO: Molecular Function	dopamine beta-monooxygenase activity	1.60E-02	1.20E-01	1	1	DBH
GO: Molecular Function	sodium-dependent organic anion transmembrane transporter activity	1.60E-02	1.20E-01	1	1	SLC10A6
GO: Molecular Function	peptidyl-dipeptidase inhibitor activity	1.60E-02	1.20E-01	1	1	GPC3
GO: Molecular Function	neuromedin B receptor binding	1.60E-02	1.20E-01	1	1	NMB
GO: Molecular Function	cyclin-dependent protein kinase activating kinase activity	1.60E-02	1.20E-01	1	1	CDKN1A
GO: Molecular Function	apelin receptor binding	1.60E-02	1.20E-01	1	1	APLN
GO: Molecular Function	beta-alanine transmembrane transporter activity	1.60E-02	1.20E-01	1	1	SLC6A6
GO: Molecular Function	"oxidoreductase activity, acting on CH or CH2 groups, oxygen as acceptor"	1.60E-02	1.20E-01	1	1	XDH
GO: Molecular Function	endothelin A receptor binding	1.60E-02	1.20E-01	1	1	EDN1
GO: Molecular Function	host cell surface receptor binding	1.60E-02	1.20E-01	1	1	INHBB
GO: Molecular Function	host cell surface binding	1.60E-02	1.20E-01	1	1	INHBB
GO: Molecular Function	taurine:sodium symporter activity	1.60E-02	1.20E-01	1	1	SLC6A6
GO: Molecular Function	taurine transmembrane transporter activity	1.60E-02	1.20E-01	1	1	SLC6A6
GO: Molecular Function	xanthine oxidase activity	1.60E-02	1.20E-01	1	1	XDH
GO: Molecular Function	tetrahydrofolylpolyglutamate synthase activity	1.60E-02	1.20E-01	1	1	FPGS
GO: Molecular Function	chylomicron binding	1.60E-02	1.20E-01	1	1	GPIHBP1
GO: Molecular Function	metal chelating activity	1.60E-02	1.20E-01	1	1	APOE
GO: Molecular Function	cholesterol 25-hydroxylase activity	1.60E-02	1.20E-01	1	1	CH25H
GO: Molecular Function	flavin-linked sulfhydryl oxidase activity	1.60E-02	1.20E-01	1	1	QSOX1
GO: Molecular Function	endothelin B receptor binding	1.60E-02	1.20E-01	1	1	EDN1
GO: Molecular Function	"inositol-4,5-bisphosphate 5-phosphatase activity"	1.60E-02	1.20E-01	1	1	INPP5D
GO: Molecular Function	U3 snoRNA binding	1.60E-02	1.20E-01	1	1	ISG20
GO: Molecular Function	apolipoprotein A-I receptor activity	1.60E-02	1.20E-01	1	1	ABCA1
GO: Molecular Function	SSU rRNA binding	1.60E-02	1.20E-01	1	1	CIRBP
GO: Molecular Function	exoribonuclease II activity	1.60E-02	1.20E-01	1	1	ISG20
GO: Molecular Function	apolipoprotein receptor activity	1.60E-02	1.20E-01	1	1	ABCA1
GO: Molecular Function	endopeptidase inhibitor activity	1.64E-02	1.22E-01	7	164	"SERPINA3,TIMP1,BCL2L1,BST2,SERPINE1,CRIM1,SERPINE2"
GO: Molecular Function	mRNA 3'-UTR binding	1.68E-02	1.23E-01	3	34	"ZFP36,CIRBP,IGF2BP1"
GO: Molecular Function	complement binding	1.77E-02	1.25E-01	2	13	"CFB,CD93"
GO: Molecular Function	metalloendopeptidase inhibitor activity	1.77E-02	1.25E-01	2	13	"TIMP1,BST2"
GO: Molecular Function	metalloenzyme inhibitor activity	1.77E-02	1.25E-01	2	13	"TIMP1,BST2"
GO: Molecular Function	vascular endothelial growth factor receptor binding	1.77E-02	1.25E-01	2	13	"ITGB3,ANGPT2"
GO: Molecular Function	endopeptidase regulator activity	1.96E-02	1.37E-01	7	170	"SERPINA3,TIMP1,BCL2L1,BST2,SERPINE1,CRIM1,SERPINE2"
GO: Molecular Function	metalloenzyme regulator activity	2.04E-02	1.41E-01	2	14	"TIMP1,BST2"
GO: Molecular Function	retinoid binding	2.10E-02	1.44E-01	3	37	"NR2F2,ALDH1A2,CYP26B1"
GO: Molecular Function	endopeptidase activity	2.14E-02	1.46E-01	12	385	"ACE,CFB,PSMB8,PSMB9,UCHL1,ADAMTS6,CTSS,PLAU,CTRL,PRSS23,MMP17,MMP2"
GO: Molecular Function	enzyme inhibitor activity	2.17E-02	1.46E-01	11	341	"SERPINA3,GPC3,TIMP1,CDKN1A,BCL2L1,BST2,SERPINE1,CRIM1,SOCS3,ITPRIP,SERPINE2"
GO: Molecular Function	pyrophosphatase activity	2.27E-02	1.51E-01	21	819	"ABCA1,DHX58,RNF213,TUBB6,IRGM,RASD1,MX2,ABCG2,GEM,GBP2,GBP3,EHD4,GBP5,GBP4,DDX60,GBP6,GBP7,TAP1,ENTPD1,RHOB,CGNL1"
GO: Molecular Function	"hydrolase activity, acting on acid anhydrides, in phosphorus-containing anhydrides"	2.32E-02	1.52E-01	21	821	"ABCA1,DHX58,RNF213,TUBB6,IRGM,RASD1,MX2,ABCG2,GEM,GBP2,GBP3,EHD4,GBP5,GBP4,DDX60,GBP6,GBP7,TAP1,ENTPD1,RHOB,CGNL1"
GO: Molecular Function	cholesterol transporter activity	2.33E-02	1.52E-01	2	15	"ABCA1,APOE"
GO: Molecular Function	"hydrolase activity, acting on acid anhydrides"	2.38E-02	1.54E-01	21	823	"ABCA1,DHX58,RNF213,TUBB6,IRGM,RASD1,MX2,ABCG2,GEM,GBP2,GBP3,EHD4,GBP5,GBP4,DDX60,GBP6,GBP7,TAP1,ENTPD1,RHOB,CGNL1"
GO: Molecular Function	monocarboxylic acid binding	2.57E-02	1.57E-01	4	70	"PPARG,FABP4,NR2F2,CYP26B1"
GO: Molecular Function	isoprenoid binding	2.58E-02	1.57E-01	3	40	"NR2F2,ALDH1A2,CYP26B1"
GO: Molecular Function	lipopolysaccharide binding	2.63E-02	1.57E-01	2	16	"TRIL,CD14"
GO: Molecular Function	sterol transporter activity	2.63E-02	1.57E-01	2	16	"ABCA1,APOE"
GO: Molecular Function	transcription regulatory region DNA binding	2.73E-02	1.57E-01	12	399	"PPARG,DBP,JUNB,KLF9,IRF7,NLRC5,NR1D2,MYC,PER1,NR1D1,EGR1,STAT1"
GO: Molecular Function	"intramolecular oxidoreductase activity, transposing S-S bonds"	2.95E-02	1.57E-01	2	17	"ITGB3,QSOX1"
GO: Molecular Function	protein disulfide isomerase activity	2.95E-02	1.57E-01	2	17	"ITGB3,QSOX1"
GO: Molecular Function	RNA polymerase II transcription regulatory region sequence-specific DNA binding transcription factor activity involved in positive regulation of transcription	2.96E-02	1.57E-01	5	108	"PPARG,DBP,KLF9,HMGA1,EGR1"
GO: Molecular Function	regulatory region DNA binding	3.06E-02	1.57E-01	12	406	"PPARG,DBP,JUNB,KLF9,IRF7,NLRC5,NR1D2,MYC,PER1,NR1D1,EGR1,STAT1"
GO: Molecular Function	regulatory region nucleic acid binding	3.06E-02	1.57E-01	12	406	"PPARG,DBP,JUNB,KLF9,IRF7,NLRC5,NR1D2,MYC,PER1,NR1D1,EGR1,STAT1"
GO: Molecular Function	carboxylic acid binding	3.12E-02	1.57E-01	8	229	"PPARG,DBH,SELE,FABP4,NR2F2,LTC4S,DDAH1,CYP26B1"
GO: Molecular Function	dihydroceramidase activity	3.17E-02	1.57E-01	1	2	ACER2
GO: Molecular Function	protein tyrosine phosphatase activator activity	3.17E-02	1.57E-01	1	2	IGFBP3
GO: Molecular Function	ceramide kinase activity	3.17E-02	1.57E-01	1	2	CERK
GO: Molecular Function	UMP kinase activity	3.17E-02	1.57E-01	1	2	CMPK2
GO: Molecular Function	bradykinin receptor binding	3.17E-02	1.57E-01	1	2	ACE
GO: Molecular Function	DNA (6-4) photolyase activity	3.17E-02	1.57E-01	1	2	CRY2
GO: Molecular Function	xanthine dehydrogenase activity	3.17E-02	1.57E-01	1	2	XDH
GO: Molecular Function	"oxidoreductase activity, acting on CH or CH2 groups, NAD or NADP as acceptor"	3.17E-02	1.57E-01	1	2	XDH
GO: Molecular Function	ornithine decarboxylase activity	3.17E-02	1.57E-01	1	2	ODC1
GO: Molecular Function	blue light photoreceptor activity	3.17E-02	1.57E-01	1	2	CRY2
GO: Molecular Function	taurine binding	3.17E-02	1.57E-01	1	2	SLC6A6
GO: Molecular Function	A1 adenosine receptor binding	3.17E-02	1.57E-01	1	2	P2RY2
GO: Molecular Function	deoxyribodipyrimidine photo-lyase activity	3.17E-02	1.57E-01	1	2	CRY2
GO: Molecular Function	dimethylargininase activity	3.17E-02	1.57E-01	1	2	DDAH1
GO: Molecular Function	thymidylate kinase activity	3.17E-02	1.57E-01	1	2	CMPK2
GO: Molecular Function	protein tag	3.17E-02	1.57E-01	1	2	ISG15
GO: Molecular Function	structural constituent of bone	3.17E-02	1.57E-01	1	2	MGP
GO: Molecular Function	DNA photolyase activity	3.17E-02	1.57E-01	1	2	CRY2
GO: Molecular Function	U1 snRNA binding	3.17E-02	1.57E-01	1	2	ISG20
GO: Molecular Function	platelet-activating factor acetyltransferase activity	3.17E-02	1.57E-01	1	2	PAFAH1B3
GO: Molecular Function	U2 snRNA binding	3.17E-02	1.57E-01	1	2	ISG20
GO: Molecular Function	UTP-activated nucleotide receptor activity	3.17E-02	1.57E-01	1	2	P2RY2
GO: Molecular Function	uridylate kinase activity	3.17E-02	1.57E-01	1	2	CMPK2
GO: Molecular Function	protein kinase activator activity	3.30E-02	1.62E-01	3	44	"CDKN1A,RGCC,IGF2"
GO: Molecular Function	organic acid binding	3.33E-02	1.62E-01	8	232	"PPARG,DBH,SELE,FABP4,NR2F2,LTC4S,DDAH1,CYP26B1"
GO: Molecular Function	carbohydrate binding	3.63E-02	1.74E-01	8	236	"CLEC10A,CLEC14A,DBH,OLR1,SELE,CD93,TINAGL1,LGALS1"
GO: Molecular Function	nucleoside diphosphate kinase activity	3.64E-02	1.74E-01	2	19	"CMPK2,AK1"
GO: Molecular Function	retinoid X receptor binding	3.64E-02	1.74E-01	2	19	"PPARG,HMGA1"
GO: Molecular Function	hormone activity	3.85E-02	1.83E-01	5	116	"INHBB,APLN,EDN1,IGF2,NMB"
GO: Molecular Function	solute:sodium symporter activity	4.34E-02	1.94E-01	3	49	"SLC10A6,SLC6A6,SLC1A5"
GO: Molecular Function	nucleobase-containing compound kinase activity	4.34E-02	1.94E-01	3	49	"CMPK2,AK1,UCK2"
GO: Molecular Function	chemoattractant activity	4.37E-02	1.94E-01	2	21	"BMP4,PDGFB"
GO: Molecular Function	threonine-type peptidase activity	4.37E-02	1.94E-01	2	21	"PSMB8,PSMB9"
GO: Molecular Function	threonine-type endopeptidase activity	4.37E-02	1.94E-01	2	21	"PSMB8,PSMB9"
GO: Molecular Function	insulin-like growth factor-activated receptor activity	4.72E-02	1.94E-01	1	3	CRIM1
GO: Molecular Function	lactose binding	4.72E-02	1.94E-01	1	3	LGALS1
GO: Molecular Function	disaccharide binding	4.72E-02	1.94E-01	1	3	LGALS1
GO: Molecular Function	N-acetylglucosamine-6-sulfatase activity	4.72E-02	1.94E-01	1	3	SULF2
GO: Molecular Function	mercury ion binding	4.72E-02	1.94E-01	1	3	FN1
GO: Molecular Function	complement component C1q binding	4.72E-02	1.94E-01	1	3	CD93
GO: Molecular Function	GMP binding	4.72E-02	1.94E-01	1	3	GBP3
GO: Molecular Function	adiponectin binding	4.72E-02	1.94E-01	1	3	CDH13
GO: Molecular Function	apolipoprotein A-I binding	4.72E-02	1.94E-01	1	3	ABCA1
GO: Molecular Function	tapasin binding	4.72E-02	1.94E-01	1	3	TAP1
GO: Molecular Function	peptidyl-dipeptidase activity	4.72E-02	1.94E-01	1	3	ACE
GO: Molecular Function	Rho GDP-dissociation inhibitor activity	4.72E-02	1.94E-01	1	3	ARHGDIB
GO: Molecular Function	leukotriene-C4 synthase activity	4.72E-02	1.94E-01	1	3	LTC4S
GO: Molecular Function	lipoteichoic acid binding	4.72E-02	1.94E-01	1	3	CD14
GO: Molecular Function	A-type (transient outward) potassium channel activity	4.72E-02	1.94E-01	1	3	KCND3
GO: Molecular Function	single-stranded DNA 3'-5' exodeoxyribonuclease activity	4.72E-02	1.94E-01	1	3	ISG20
GO: Molecular Function	thiol oxidase activity	4.72E-02	1.94E-01	1	3	QSOX1
GO: Molecular Function	retinoic acid 4-hydroxylase activity	4.72E-02	1.94E-01	1	3	CYP26B1
GO: Molecular Function	enzyme activator activity	4.75E-02	1.94E-01	12	435	"CHN2,CDKN1A,RGCC,ERRFI1,LTC4S,PDGFB,APOE,IGF2,IGFBP3,ARHGDIB,FN1,MMP17"
GO: Molecular Function	"peptidase activity, acting on L-amino acid peptides"	4.82E-02	1.96E-01	15	583	"ACE,CFB,USP18,TINAGL1,PRCP,PSMB8,PSMB9,UCHL1,ADAMTS6,CTSS,PLAU,CTRL,PRSS23,MMP17,MMP2"
GO: Biological Process	defense response	1.56E-25	6.58E-22	84	1465	"CLEC10A,TGM2,IL33,SERPINA3,ACE,B2M,UBE2L6,IFI30,PPARG,PARP9,ZNF580,GJA1,DHX58,CDKN1A,CFB,OAS2,OAS1,ADA,TRAFD1,CYBB,IFITM3,BCL2L1,OLR1,BST2,USP18,ZFP36,SELE,SERPINE1,IRF7,ISG20,TRIL,IRGM,MX2,IER3,NLRC5,CXCL10,NR1D2,INHBB,PRCP,CHST2,FABP4,HLA-E,HLA-DRB5,IL15,F2R,HLA-DQB1,HLA-DQA1,GBP2,GBP3,HLA-A,VCAM1,PSMB8,GBP5,RSAD2,GBP4,DDX60,XAF1,GBP6,GBP7,MDK,PDGFB,PDGFA,SOCS3,APOE,SEMA7A,TAP1,TYROBP,NR1D1,CD14,FN1,LGALS3BP,IFIT3,CTSS,IFIT2,IFIT1,IFI16,ISG15,MNDA,EGR1,OASL,STAT1,MMP2,CD74,DDIT4"
GO: Biological Process	response to cytokine	4.29E-23	9.06E-20	52	611	"SERPINA3,B2M,UBE2L6,IFI30,PPARG,PARP9,TIMP1,OAS2,OAS1,TRAFD1,IFITM3,BCL2L1,JUNB,BST2,USP18,SELE,IRF7,ISG20,IRGM,MX2,NLRC5,HLA-E,HLA-DRB5,HLA-DQB1,HLA-DQA1,ALDH1A2,GBP2,GBP3,HLA-A,VCAM1,PSMB8,EDN1,GBP5,GBP4,XAF1,GBP6,GBP7,SOCS3,APOE,CXCL12,NPNT,CD14,FN1,IFIT3,IFIT2,IFIT1,IFI16,ISG15,EGR1,OASL,STAT1,CD74"
GO: Biological Process	immune response	3.60E-22	5.07E-19	76	1365	"CLEC10A,IL33,ACE,B2M,UBE2L6,IFI30,PPARG,PARP9,DHX58,CD274,CDKN1A,CFB,OAS2,OAS1,GADD45G,ADA,TRAFD1,CYBB,IFITM3,BCL2L1,BST2,USP18,IRF7,ISG20,TRIL,IRGM,MX2,INPP5D,NLRC5,RGCC,TINAGL1,CXCL10,GEM,HLA-E,HLA-DRB5,IL15,APLN,HLA-DQB1,HLA-DQA1,GBP2,GBP3,HLA-A,HLA-DMA,VCAM1,PSMB8,GBP5,RSAD2,GBP4,DDX60,XAF1,GBP6,GBP7,PDGFB,PDGFA,SOCS3,CXCL12,SEMA7A,TAP1,TYROBP,NR1D1,ARHGDIB,CD14,LGALS1,IFIT3,CTSS,IFIT2,IFIT1,IFI16,ISG15,MNDA,EGR1,OASL,STAT1,PROCR,MMP2,CD74"
GO: Biological Process	response to interferon-gamma	7.49E-22	7.90E-19	26	123	"B2M,IFI30,PPARG,PARP9,OAS2,OAS1,IFITM3,BST2,IRF7,IRGM,NLRC5,HLA-E,HLA-DRB5,HLA-DQB1,HLA-DQA1,GBP2,GBP3,HLA-A,VCAM1,GBP5,GBP4,GBP6,GBP7,SOCS3,OASL,STAT1"
GO: Biological Process	type I interferon signaling pathway	1.67E-20	1.37E-17	21	76	"OAS2,OAS1,IFITM3,USP18,IRF7,ISG20,MX2,NLRC5,HLA-E,GBP2,HLA-A,PSMB8,XAF1,SOCS3,IFIT3,IFIT2,IFIT1,ISG15,EGR1,OASL,STAT1"
GO: Biological Process	innate immune response	1.94E-20	1.37E-17	57	842	"CLEC10A,B2M,UBE2L6,IFI30,PPARG,PARP9,DHX58,CDKN1A,CFB,OAS2,OAS1,TRAFD1,CYBB,IFITM3,BCL2L1,BST2,USP18,IRF7,ISG20,TRIL,IRGM,MX2,NLRC5,HLA-E,HLA-DRB5,HLA-DQB1,HLA-DQA1,GBP2,GBP3,HLA-A,VCAM1,PSMB8,GBP5,RSAD2,GBP4,DDX60,XAF1,GBP6,GBP7,PDGFB,PDGFA,SOCS3,TAP1,TYROBP,NR1D1,CD14,IFIT3,CTSS,IFIT2,IFIT1,IFI16,ISG15,EGR1,OASL,STAT1,MMP2,CD74"
GO: Biological Process	cellular response to type I interferon	2.27E-20	1.37E-17	21	77	"OAS2,OAS1,IFITM3,USP18,IRF7,ISG20,MX2,NLRC5,HLA-E,GBP2,HLA-A,PSMB8,XAF1,SOCS3,IFIT3,IFIT2,IFIT1,ISG15,EGR1,OASL,STAT1"
GO: Biological Process	response to type I interferon	3.06E-20	1.61E-17	21	78	"OAS2,OAS1,IFITM3,USP18,IRF7,ISG20,MX2,NLRC5,HLA-E,GBP2,HLA-A,PSMB8,XAF1,SOCS3,IFIT3,IFIT2,IFIT1,ISG15,EGR1,OASL,STAT1"
GO: Biological Process	cellular response to interferon-gamma	7.23E-19	3.39E-16	22	102	"B2M,IFI30,PPARG,OAS2,OAS1,IRF7,NLRC5,HLA-E,HLA-DRB5,HLA-DQB1,HLA-DQA1,GBP2,GBP3,HLA-A,VCAM1,GBP5,GBP4,GBP6,GBP7,SOCS3,OASL,STAT1"
GO: Biological Process	cellular response to cytokine stimulus	2.06E-17	8.68E-15	41	510	"B2M,UBE2L6,IFI30,PPARG,OAS2,OAS1,IFITM3,USP18,IRF7,ISG20,MX2,NLRC5,HLA-E,HLA-DRB5,HLA-DQB1,HLA-DQA1,GBP2,GBP3,HLA-A,VCAM1,PSMB8,EDN1,GBP5,GBP4,XAF1,GBP6,GBP7,SOCS3,APOE,CXCL12,NPNT,FN1,IFIT3,IFIT2,IFIT1,IFI16,ISG15,EGR1,OASL,STAT1,CD74"
GO: Biological Process	response to external biotic stimulus	3.17E-17	1.12E-14	47	681	"CMPK2,ACE,B2M,ABCA1,DHX58,ACTA2,ODC1,OAS2,OAS1,IFITM3,BCL2L1,BST2,HMGA1,SELE,SERPINE1,IRF7,ISG20,IRGM,MX2,IER3,NLRC5,CXCL10,HLA-DRB5,IL15,F2R,GBP2,GBP3,HLA-A,VCAM1,EDN1,RSAD2,GBP4,DDX60,GBP6,GBP7,CXCL12,NR1D1,IFI44,CD14,IFIT3,IFIT2,IFIT1,IFI16,ISG15,OASL,STAT1,DDIT4"
GO: Biological Process	response to other organism	3.17E-17	1.12E-14	47	681	"CMPK2,ACE,B2M,ABCA1,DHX58,ACTA2,ODC1,OAS2,OAS1,IFITM3,BCL2L1,BST2,HMGA1,SELE,SERPINE1,IRF7,ISG20,IRGM,MX2,IER3,NLRC5,CXCL10,HLA-DRB5,IL15,F2R,GBP2,GBP3,HLA-A,VCAM1,EDN1,RSAD2,GBP4,DDX60,GBP6,GBP7,CXCL12,NR1D1,IFI44,CD14,IFIT3,IFIT2,IFIT1,IFI16,ISG15,OASL,STAT1,DDIT4"
GO: Biological Process	regulation of response to stress	5.28E-17	1.67E-14	55	934	"TGM2,IL33,ACE,B2M,PPARG,PARP9,SERINC3,GJA1,DHX58,DAXX,CFB,GADD45G,ADA,TRAFD1,BCL2L1,HMGA1,USP18,ZFP36,SELE,SERPINE1,XDH,IRF7,TRIL,IER3,NLRC5,NR1D2,FABP4,NEK6,IL15,F2R,HLA-A,MYC,EDN1,RSAD2,MAP3K6,DDX60,GBP6,PDGFB,PDGFA,SOCS3,APOE,CXCL12,SEMA7A,TAP1,NR1D1,CTGF,CD14,CTSS,IFIT1,IFI16,PLAU,STAT1,MMP2,CD74,SERPINE2"
GO: Biological Process	response to virus	5.54E-17	1.67E-14	31	286	"B2M,DHX58,ACTA2,ODC1,OAS2,OAS1,IFITM3,BCL2L1,BST2,HMGA1,IRF7,ISG20,MX2,NLRC5,CXCL10,IL15,GBP3,HLA-A,RSAD2,DDX60,GBP6,CXCL12,IFI44,IFIT3,IFIT2,IFIT1,IFI16,ISG15,OASL,STAT1,DDIT4"
GO: Biological Process	response to biotic stimulus	1.89E-16	5.33E-14	47	713	"CMPK2,ACE,B2M,ABCA1,DHX58,ACTA2,ODC1,OAS2,OAS1,IFITM3,BCL2L1,BST2,HMGA1,SELE,SERPINE1,IRF7,ISG20,IRGM,MX2,IER3,NLRC5,CXCL10,HLA-DRB5,IL15,F2R,GBP2,GBP3,HLA-A,VCAM1,EDN1,RSAD2,GBP4,DDX60,GBP6,GBP7,CXCL12,NR1D1,IFI44,CD14,IFIT3,IFIT2,IFIT1,IFI16,ISG15,OASL,STAT1,DDIT4"
GO: Biological Process	immune effector process	5.50E-16	1.45E-13	43	616	"IL33,ACE,B2M,DHX58,DBH,CFB,OAS2,OAS1,GADD45G,ADA,IFITM3,BST2,IRF7,ISG20,TRIL,MX2,INPP5D,NLRC5,RGCC,CXCL10,HLA-E,HLA-DRB5,IL15,HLA-DQB1,GBP3,HLA-A,HLA-DMA,RSAD2,DDX60,GBP6,SEMA7A,TAP1,TYROBP,LGALS1,IFIT3,IFIT2,IFIT1,IFI16,ISG15,OASL,STAT1,CD74,DDIT4"
GO: Biological Process	interferon-gamma-mediated signaling pathway	3.03E-15	7.52E-13	17	75	"B2M,IFI30,PPARG,OAS2,OAS1,IRF7,NLRC5,HLA-E,HLA-DRB5,HLA-DQB1,HLA-DQA1,GBP2,HLA-A,VCAM1,SOCS3,OASL,STAT1"
GO: Biological Process	vasculature development	3.29E-15	7.72E-13	41	590	"ACE,GPC3,GJA1,ACTA2,GPR56,COL18A1,JUNB,ITGB3,ROM1,BMP4,SERPINE1,XDH,RGCC,CXCL10,PRCP,NR2F2,BMPER,ALDH1A2,EDN1,ANGPT2,ERRFI1,PDGFB,PDGFA,SOCS3,APOE,CXCL12,COL4A1,MKL2,COL4A2,CYR61,DDAH1,CTGF,TNFRSF12A,FN1,RHOB,ESM1,PLAU,CDH13,EGR1,STAT1,MMP2"
GO: Biological Process	defense response to virus	5.93E-15	1.32E-12	25	208	"B2M,DHX58,OAS2,OAS1,IFITM3,BST2,IRF7,ISG20,MX2,NLRC5,CXCL10,IL15,GBP3,HLA-A,RSAD2,DDX60,GBP6,IFIT3,IFIT2,IFIT1,IFI16,ISG15,OASL,STAT1,DDIT4"
GO: Biological Process	blood vessel development	1.55E-14	3.27E-12	39	560	"ACE,GPC3,GJA1,ACTA2,GPR56,COL18A1,JUNB,ITGB3,BMP4,SERPINE1,XDH,RGCC,CXCL10,PRCP,NR2F2,BMPER,ALDH1A2,EDN1,ANGPT2,PDGFB,PDGFA,SOCS3,APOE,CXCL12,COL4A1,MKL2,COL4A2,CYR61,DDAH1,CTGF,TNFRSF12A,FN1,RHOB,ESM1,PLAU,CDH13,EGR1,STAT1,MMP2"
GO: Biological Process	regulation of defense response	2.50E-14	5.03E-12	38	540	"TGM2,IL33,ACE,B2M,PPARG,PARP9,GJA1,DHX58,CFB,ADA,TRAFD1,USP18,ZFP36,SELE,SERPINE1,IRF7,TRIL,IER3,NLRC5,NR1D2,FABP4,IL15,HLA-A,RSAD2,DDX60,GBP6,SOCS3,APOE,SEMA7A,TAP1,NR1D1,CD14,CTSS,IFIT1,IFI16,STAT1,MMP2,CD74"
GO: Biological Process	regulation of immune system process	4.16E-14	7.90E-12	57	1163	"IL33,B2M,PPARG,PARP9,ZNF580,DHX58,CD274,CDKN1A,CFB,ADA,TRAFD1,BST2,USP18,ITGB3,ZFP36,BMP4,SELE,SERPINE1,IRF7,TRIL,INPP5D,NLRC5,RGCC,CXCL10,HLA-E,HLA-DRB5,IL15,HLA-DQB1,HLA-DQA1,HLA-A,HLA-DMA,VCAM1,MYC,EDN1,RSAD2,DDX60,GBP6,PDGFB,PDGFA,SOCS3,CXCL12,IGF2,SEMA7A,TAP1,TYROBP,NR1D1,CD14,LGALS1,CTSS,IFIT1,IFI16,ISG15,MNDA,ZBTB16,STAT1,MMP2,CD74"
GO: Biological Process	cytokine-mediated signaling pathway	4.31E-14	7.90E-12	32	388	"B2M,UBE2L6,IFI30,PPARG,OAS2,OAS1,IFITM3,USP18,IRF7,ISG20,MX2,NLRC5,HLA-E,HLA-DRB5,HLA-DQB1,HLA-DQA1,GBP2,HLA-A,VCAM1,PSMB8,EDN1,XAF1,SOCS3,CXCL12,IFIT3,IFIT2,IFIT1,ISG15,EGR1,OASL,STAT1,CD74"
GO: Biological Process	response to wounding	8.79E-14	1.55E-11	58	1220	"TGM2,IL33,SERPINA3,ACE,PPARG,TIMP1,ZNF580,GJA1,RTN4RL2,ACTN1,CFB,ADA,CYBB,OLR1,ITGB3,ZFP36,SELE,SERPINE1,TRIL,IRGM,WEE1,IER3,INPP5D,CXCL10,NR1D2,PRCP,SLC3A2,CHST2,FABP4,HLA-DRB5,IL15,F2R,VCAM1,MYC,EDN1,ANGPT2,UCK2,MDK,PDGFB,PDGFA,APOE,IGF2,CYR61,SEMA7A,CTGF,ENTPD1,CD14,FN1,LGALS1,RHOB,CTSS,MAFF,IFI16,PLAU,PROCR,MMP2,SERPINE2,CD63"
GO: Biological Process	regulation of cell migration	9.74E-14	1.64E-11	36	507	"IL33,ACE,TIMP1,ZNF580,GPR56,COL18A1,ADA,BST2,ITGB3,BMP4,SELE,SERPINE1,P2RY2,RGCC,CXCL10,PRCP,VIM,NR2F2,F2R,BMPER,EDN1,ANGPT2,PDGFB,PDGFA,APOE,CXCL12,IGFBP3,CYR61,FN1,FLRT2,PLAU,CDH13,MMP2,CD74,SERPINE2,CD63"
GO: Biological Process	cell migration	1.50E-13	2.43E-11	52	1021	"IL33,ACE,PARP9,TIMP1,ZNF580,GJA1,DBH,HOXB9,GPR56,COL18A1,ADA,OLR1,BST2,ITGB3,ITGA1,BMP4,SELE,SERPINE1,P2RY2,INPP5D,RGCC,CXCL10,PRCP,SLC3A2,VIM,NR2F2,F2R,BMPER,VCAM1,EDN1,ANGPT2,MDK,PDGFB,PDGFA,APOE,CXCL12,IGFBP3,CYR61,SHROOM2,CTGF,TNFRSF12A,FN1,FLRT2,PLAU,CDH13,LHX6,STAT1,MMP2,CD74,SERPINE2,DDIT4,CD63"
GO: Biological Process	regulation of cell motility	4.84E-13	7.57E-11	36	535	"IL33,ACE,TIMP1,ZNF580,GPR56,COL18A1,ADA,BST2,ITGB3,BMP4,SELE,SERPINE1,P2RY2,RGCC,CXCL10,PRCP,VIM,NR2F2,F2R,BMPER,EDN1,ANGPT2,PDGFB,PDGFA,APOE,CXCL12,IGFBP3,CYR61,FN1,FLRT2,PLAU,CDH13,MMP2,CD74,SERPINE2,CD63"
GO: Biological Process	regulation of cell proliferation	5.59E-13	8.43E-11	61	1388	"TGM2,IFI30,PPARG,GPC3,TIMP1,ZNF580,GJA1,DBH,CD274,GPR56,CDKN1A,ODC1,COL18A1,ADA,IFITM3,BCL2L1,HMGA1,ITGB3,ITGA1,BMP4,SERPINE1,XDH,INPP5D,RGCC,CXCL10,FABP4,VIM,HLA-DRB5,IL15,APLN,NR2F2,F2R,HLA-DQB1,HLA-DQA1,ALDH1A2,TSC22D1,VCAM1,MYC,EDN1,ACER2,S100A6,PDGFB,PDGFA,APOE,CXCL12,IGF2,IGFBP3,TP53I11,CYR61,NR1D1,CTGF,IFIT3,PLAU,MNDA,ZBTB16,CDH13,EGR1,NMB,STAT1,CD74,SERPINE2"
GO: Biological Process	response to interferon-beta	5.94E-13	8.65E-11	10	22	"IFITM3,BST2,GBP2,GBP3,GBP4,XAF1,GBP6,IFIT3,IFI16,STAT1"
GO: Biological Process	defense response to other organism	7.11E-13	1.00E-10	30	377	"B2M,DHX58,OAS2,OAS1,IFITM3,BST2,SERPINE1,IRF7,ISG20,IRGM,MX2,NLRC5,CXCL10,IL15,GBP2,GBP3,HLA-A,RSAD2,GBP4,DDX60,GBP6,GBP7,IFIT3,IFIT2,IFIT1,IFI16,ISG15,OASL,STAT1,DDIT4"
GO: Biological Process	regulation of cellular component movement	7.80E-13	1.06E-10	38	603	"IL33,ACE,TIMP1,ZNF580,GJA1,GPR56,COL18A1,ACTN1,ADA,BST2,ITGB3,BMP4,SELE,SERPINE1,P2RY2,RGCC,CXCL10,PRCP,VIM,NR2F2,F2R,BMPER,EDN1,ANGPT2,PDGFB,PDGFA,APOE,CXCL12,IGFBP3,CYR61,FN1,FLRT2,PLAU,CDH13,MMP2,CD74,SERPINE2,CD63"
GO: Biological Process	regulation of locomotion	8.17E-13	1.08E-10	37	574	"IL33,ACE,TIMP1,ZNF580,GPR56,COL18A1,ADA,IFITM3,BST2,ITGB3,BMP4,SELE,SERPINE1,P2RY2,RGCC,CXCL10,PRCP,VIM,NR2F2,F2R,BMPER,EDN1,ANGPT2,PDGFB,PDGFA,APOE,CXCL12,IGFBP3,CYR61,FN1,FLRT2,PLAU,CDH13,MMP2,CD74,SERPINE2,CD63"
GO: Biological Process	blood vessel morphogenesis	1.14E-12	1.46E-10	34	493	"ACE,GJA1,GPR56,COL18A1,JUNB,ITGB3,BMP4,SERPINE1,XDH,RGCC,CXCL10,PRCP,NR2F2,BMPER,EDN1,ANGPT2,PDGFB,PDGFA,APOE,CXCL12,COL4A1,MKL2,COL4A2,CYR61,DDAH1,CTGF,TNFRSF12A,FN1,RHOB,ESM1,PLAU,CDH13,STAT1,MMP2"
GO: Biological Process	regulation of apoptotic process	2.53E-12	3.15E-10	58	1322	"TGM2,ACE,PIM3,PPARG,DAP,STK17B,TIMP1,SERINC3,DAXX,DBH,CDKN1A,COL18A1,ACTN1,UNC5A,SIK1,GADD45G,ADA,BCL2L1,ITGA1,BMP4,SERPINE1,XDH,IRF7,IER3,INPP5D,RGCC,INHBB,AMIGO2,F2R,ALDH1A2,TSC22D1,MYC,PSMB8,PSMB9,EDN1,ACER2,UCP2,MDK,SOCS3,APOE,CXCL12,IGFBP3,CYR61,CTGF,TNFRSF12A,ITPRIP,FN1,LGALS1,RHOB,IFIT3,IFIT2,MNDA,ZBTB16,PIM1,EGR1,STAT1,MMP2,CD74"
GO: Biological Process	regulation of programmed cell death	4.02E-12	4.71E-10	58	1337	"TGM2,ACE,PIM3,PPARG,DAP,STK17B,TIMP1,SERINC3,DAXX,DBH,CDKN1A,COL18A1,ACTN1,UNC5A,SIK1,GADD45G,ADA,BCL2L1,ITGA1,BMP4,SERPINE1,XDH,IRF7,IER3,INPP5D,RGCC,INHBB,AMIGO2,F2R,ALDH1A2,TSC22D1,MYC,PSMB8,PSMB9,EDN1,ACER2,UCP2,MDK,SOCS3,APOE,CXCL12,IGFBP3,CYR61,CTGF,TNFRSF12A,ITPRIP,FN1,LGALS1,RHOB,IFIT3,IFIT2,MNDA,ZBTB16,PIM1,EGR1,STAT1,MMP2,CD74"
GO: Biological Process	cell motility	4.13E-12	4.71E-10	52	1113	"IL33,ACE,PARP9,TIMP1,ZNF580,GJA1,DBH,HOXB9,GPR56,COL18A1,ADA,OLR1,BST2,ITGB3,ITGA1,BMP4,SELE,SERPINE1,P2RY2,INPP5D,RGCC,CXCL10,PRCP,SLC3A2,VIM,NR2F2,F2R,BMPER,VCAM1,EDN1,ANGPT2,MDK,PDGFB,PDGFA,APOE,CXCL12,IGFBP3,CYR61,SHROOM2,CTGF,TNFRSF12A,FN1,FLRT2,PLAU,CDH13,LHX6,STAT1,MMP2,CD74,SERPINE2,DDIT4,CD63"
GO: Biological Process	localization of cell	4.13E-12	4.71E-10	52	1113	"IL33,ACE,PARP9,TIMP1,ZNF580,GJA1,DBH,HOXB9,GPR56,COL18A1,ADA,OLR1,BST2,ITGB3,ITGA1,BMP4,SELE,SERPINE1,P2RY2,INPP5D,RGCC,CXCL10,PRCP,SLC3A2,VIM,NR2F2,F2R,BMPER,VCAM1,EDN1,ANGPT2,MDK,PDGFB,PDGFA,APOE,CXCL12,IGFBP3,CYR61,SHROOM2,CTGF,TNFRSF12A,FN1,FLRT2,PLAU,CDH13,LHX6,STAT1,MMP2,CD74,SERPINE2,DDIT4,CD63"
GO: Biological Process	regulation of cell death	7.17E-12	7.97E-10	59	1395	"TGM2,ACE,PIM3,PPARG,DAP,STK17B,TIMP1,SERINC3,DAXX,DBH,CDKN1A,COL18A1,ACTN1,UNC5A,SIK1,GADD45G,ADA,BCL2L1,ITGA1,BMP4,SERPINE1,XDH,IRF7,IER3,INPP5D,RGCC,INHBB,AMIGO2,F2R,ALDH1A2,TSC22D1,MYC,PSMB8,PSMB9,EDN1,ACER2,UCP2,MDK,SOCS3,APOE,CXCL12,IGFBP3,CYR61,CTGF,TNFRSF12A,ITPRIP,FN1,LGALS1,RHOB,IFIT3,IFIT2,MNDA,ZBTB16,PIM1,EGR1,STAT1,MMP2,CD74,DDIT4"
GO: Biological Process	cardiovascular system development	1.02E-11	1.07E-09	45	889	"ACE,PPARG,GPC3,GJA1,ACTA2,GPR56,COL18A1,SIK1,JUNB,ITGB3,ROM1,BMP4,SERPINE1,XDH,RGCC,CXCL10,PRCP,NR2F2,BMPER,ALDH1A2,VCAM1,EDN1,ANGPT2,ERRFI1,LY6E,PDGFB,PDGFA,SOCS3,APOE,CXCL12,COL4A1,MKL2,COL4A2,CYR61,DDAH1,CTGF,TNFRSF12A,FN1,RHOB,ESM1,PLAU,CDH13,EGR1,STAT1,MMP2"
GO: Biological Process	circulatory system development	1.02E-11	1.07E-09	45	889	"ACE,PPARG,GPC3,GJA1,ACTA2,GPR56,COL18A1,SIK1,JUNB,ITGB3,ROM1,BMP4,SERPINE1,XDH,RGCC,CXCL10,PRCP,NR2F2,BMPER,ALDH1A2,VCAM1,EDN1,ANGPT2,ERRFI1,LY6E,PDGFB,PDGFA,SOCS3,APOE,CXCL12,COL4A1,MKL2,COL4A2,CYR61,DDAH1,CTGF,TNFRSF12A,FN1,RHOB,ESM1,PLAU,CDH13,EGR1,STAT1,MMP2"
GO: Biological Process	locomotion	2.33E-11	2.40E-09	59	1436	"IL33,ACE,PARP9,TIMP1,ZNF580,GJA1,DBH,HOXB9,GPR56,COL18A1,UNC5A,ADA,IFITM3,OLR1,BST2,ITGB3,ITGA1,BMP4,SELE,SERPINE1,P2RY2,INPP5D,RGCC,CXCL10,PRCP,SLC3A2,VIM,NR2F2,F2R,BMPER,VCAM1,EDN1,ANGPT2,MDK,PDGFB,PDGFA,APOE,CXCL12,COL4A1,IGFBP3,COL4A2,CYR61,SEMA7A,SHROOM2,TYROBP,CTGF,TNFRSF12A,FN1,RHOB,FLRT2,PLAU,CDH13,LHX6,STAT1,MMP2,CD74,SERPINE2,DDIT4,CD63"
GO: Biological Process	regulation of response to external stimulus	2.76E-11	2.77E-09	35	584	"TGM2,IL33,ACE,B2M,PPARG,ZNF580,DHX58,CFB,ADA,ZFP36,SELE,SERPINE1,IER3,CXCL10,NR1D2,FABP4,IL15,F2R,HLA-A,EDN1,ANGPT2,DDX60,GBP6,PDGFB,PDGFA,APOE,CXCL12,SEMA7A,FN1,CTSS,IFIT1,PLAU,CDH13,CD74,SERPINE2"
GO: Biological Process	cytokine production	2.85E-11	2.80E-09	34	554	"IL33,ABCA1,UBE2L6,PPARG,ZNF580,DHX58,DBH,CD274,GPR56,GADD45G,BST2,SULF2,ZFP36,SERPINE1,IRF7,TRIL,P2RY2,INPP5D,NLRC5,RGCC,INHBB,FABP4,HLA-DRB5,IL15,F2R,RSAD2,DDX60,GBP6,IGF2BP1,SEMA7A,CD14,IFI16,ISG15,CD74"
GO: Biological Process	positive regulation of immune system process	9.69E-11	9.30E-09	38	709	"IL33,B2M,ZNF580,DHX58,CD274,CDKN1A,CFB,ADA,SELE,SERPINE1,IRF7,TRIL,INPP5D,RGCC,CXCL10,HLA-E,HLA-DRB5,IL15,HLA-DQB1,HLA-DQA1,HLA-A,HLA-DMA,VCAM1,EDN1,RSAD2,DDX60,CXCL12,IGF2,SEMA7A,TAP1,NR1D1,CD14,LGALS1,CTSS,IFI16,MNDA,MMP2,CD74"
GO: Biological Process	regulation of immune response	1.21E-10	1.13E-08	40	782	"IL33,B2M,PPARG,PARP9,DHX58,CDKN1A,CFB,ADA,TRAFD1,BST2,USP18,IRF7,TRIL,INPP5D,NLRC5,RGCC,HLA-E,HLA-DRB5,IL15,HLA-DQB1,HLA-DQA1,HLA-A,HLA-DMA,VCAM1,RSAD2,DDX60,PDGFB,PDGFA,SOCS3,SEMA7A,TAP1,TYROBP,NR1D1,CD14,CTSS,IFI16,MNDA,STAT1,MMP2,CD74"
GO: Biological Process	regulation of multicellular organismal development	3.86E-10	3.54E-08	55	1379	"ACE,PPARG,GPC3,TIMP1,GJA1,GPR56,ADA,IRX3,ITGB3,ZFP36,BMP4,SERPINE1,XDH,IRF7,P2RY2,INPP5D,RGCC,CXCL10,NR1D2,VIM,IL15,HLA-DQA1,GPRC5B,HLA-DMA,MYC,EDN1,ANGPT2,ERRFI1,PDGFB,PDGFA,APOE,CXCL12,IGFBP3,MKL2,COL4A2,CYR61,DDAH1,SEMA7A,TYROBP,CYP26B1,CTGF,MGP,TNFRSF12A,FN1,LGALS1,RHOB,MAFF,FLRT2,PLAU,ISG15,ZBTB16,EGR1,STAT1,CD74,SERPINE2"
GO: Biological Process	negative regulation of multicellular organismal process	4.69E-10	4.14E-08	27	401	"IL33,UBE2L6,PPARG,GJA1,DHX58,ADA,BST2,BMP4,SERPINE1,P2RY2,INPP5D,NLRC5,RGCC,HLA-DRB5,APLN,F2R,EDN1,GBP6,PDGFB,PDGFA,APOE,PLAU,ISG15,STAT1,PROCR,MMP2,SERPINE2"
GO: Biological Process	cell activation	4.71E-10	4.14E-08	42	890	"IL33,ACE,B2M,TIMP1,CD274,CDKN1A,ACTN1,GADD45G,ADA,BST2,ITGB3,BMP4,SERPINE1,CD93,INPP5D,RGCC,HLA-DRB5,IL15,F2R,HLA-DQB1,HLA-DQA1,BMPER,HLA-DMA,VCAM1,EDN1,RSAD2,PDGFB,PDGFA,APOE,CXCL12,IGF2,TYROBP,CTGF,ENTPD1,FN1,LGALS1,RHOB,MNDA,EGR1,CD74,SERPINE2,CD63"
GO: Biological Process	angiogenesis	5.84E-10	5.03E-08	27	405	"ACE,GPR56,COL18A1,ITGB3,BMP4,SERPINE1,RGCC,CXCL10,PRCP,BMPER,EDN1,ANGPT2,PDGFA,CXCL12,COL4A1,COL4A2,CYR61,DDAH1,CTGF,TNFRSF12A,FN1,RHOB,ESM1,PLAU,CDH13,STAT1,MMP2"
GO: Biological Process	positive regulation of cell death	1.60E-09	1.35E-07	28	454	"TGM2,ACE,STK17B,CDKN1A,COL18A1,UNC5A,SIK1,GADD45G,BCL2L1,ITGA1,BMP4,INPP5D,RGCC,ALDH1A2,TSC22D1,MYC,ACER2,UCP2,IGFBP3,CYR61,CTGF,RHOB,IFIT2,MNDA,ZBTB16,EGR1,MMP2,DDIT4"
GO: Biological Process	inflammatory response	1.78E-09	1.47E-07	32	582	"TGM2,IL33,SERPINA3,ACE,PPARG,ZNF580,GJA1,CFB,ADA,CYBB,OLR1,ZFP36,SELE,SERPINE1,TRIL,IRGM,IER3,CXCL10,NR1D2,PRCP,CHST2,FABP4,HLA-DRB5,IL15,F2R,VCAM1,APOE,SEMA7A,CD14,FN1,CTSS,IFI16"
GO: Biological Process	regulation of cytokine production	2.26E-09	1.84E-07	29	492	"IL33,UBE2L6,PPARG,ZNF580,DHX58,CD274,BST2,SULF2,ZFP36,SERPINE1,IRF7,TRIL,P2RY2,INPP5D,NLRC5,RGCC,INHBB,HLA-DRB5,IL15,F2R,RSAD2,DDX60,GBP6,IGF2BP1,SEMA7A,CD14,IFI16,ISG15,CD74"
GO: Biological Process	cellular response to interferon-beta	2.79E-09	2.22E-07	7	16	"GBP2,GBP3,GBP4,GBP6,IFIT3,IFI16,STAT1"
GO: Biological Process	positive regulation of signaling	3.68E-09	2.88E-07	46	1106	"TGM2,GPC3,CHN2,SERINC3,GJA1,DHX58,DAXX,GPR56,GADD45G,ADA,BCL2L1,BST2,SULF2,ITGB3,ITGA1,BMP4,XDH,IRF7,NLRC5,CXCL10,INHBB,NEK6,IL15,F2R,BMPER,MYC,EDN1,RSAD2,MAP3K6,DDX60,ZNF423,C1QTNF1,PDGFB,PDGFA,IGF2,IGFBP3,NPNT,CYR61,SEMA7A,CTGF,TNFRSF12A,LGALS1,CDH13,EGR1,CD74,SERPINE2"
GO: Biological Process	positive regulation of cell communication	4.24E-09	3.25E-07	46	1111	"TGM2,GPC3,CHN2,SERINC3,GJA1,DHX58,DAXX,GPR56,GADD45G,ADA,BCL2L1,BST2,SULF2,ITGB3,ITGA1,BMP4,XDH,IRF7,NLRC5,CXCL10,INHBB,NEK6,IL15,F2R,BMPER,MYC,EDN1,RSAD2,MAP3K6,DDX60,ZNF423,C1QTNF1,PDGFB,PDGFA,IGF2,IGFBP3,NPNT,CYR61,SEMA7A,CTGF,TNFRSF12A,LGALS1,CDH13,EGR1,CD74,SERPINE2"
GO: Biological Process	response to oxygen-containing compound	4.44E-09	3.35E-07	50	1271	"CMPK2,SERPINA3,ACE,ABCA1,PIM3,PPARG,TIMP1,ZNF580,GJA1,DBH,CDKN1A,COL18A1,ADA,BCL2L1,JUNB,OLR1,BMP4,SELE,SERPINE1,CXCL10,INHBB,HLA-DRB5,IL15,NR2F2,F2R,ALDH1A2,GBP2,VCAM1,GPIHBP1,EDN1,ANGPT2,ACER2,GBP6,UCP2,PDGFB,PDGFA,SOCS3,APOE,CXCL12,COL4A1,IGF2,NR1D1,CYP26B1,CTGF,CD14,LGALS1,RHOB,EGR1,STAT1,MMP2"
GO: Biological Process	cell proliferation involved in kidney development	4.68E-09	3.47E-07	7	17	"GPC3,BMP4,MYC,PDGFB,PDGFA,EGR1,STAT1"
GO: Biological Process	negative regulation of cell proliferation	5.78E-09	4.20E-07	32	611	"IFI30,PPARG,GPC3,GJA1,CD274,GPR56,CDKN1A,COL18A1,IFITM3,HMGA1,ITGA1,BMP4,XDH,INPP5D,RGCC,HLA-DRB5,IL15,NR2F2,F2R,HLA-DQB1,HLA-DQA1,ALDH1A2,MYC,APOE,IGFBP3,TP53I11,IFIT3,MNDA,ZBTB16,CDH13,STAT1,SERPINE2"
GO: Biological Process	positive regulation of signal transduction	6.02E-09	4.31E-07	44	1046	"TGM2,GPC3,CHN2,SERINC3,GJA1,DHX58,DAXX,GPR56,GADD45G,ADA,BCL2L1,BST2,SULF2,ITGB3,ITGA1,BMP4,XDH,IRF7,NLRC5,CXCL10,INHBB,NEK6,IL15,F2R,BMPER,MYC,EDN1,RSAD2,MAP3K6,DDX60,ZNF423,C1QTNF1,PDGFB,PDGFA,IGF2,IGFBP3,NPNT,CYR61,SEMA7A,CTGF,TNFRSF12A,LGALS1,CDH13,CD74"
GO: Biological Process	negative regulation of viral genome replication	9.58E-09	6.74E-07	9	39	"OAS1,IFITM3,BST2,ISG20,RSAD2,IFIT1,IFI16,ISG15,OASL"
GO: Biological Process	response to lipid	1.15E-08	7.96E-07	34	698	"CMPK2,ACE,ABCA1,PPARG,CDKN1A,JUNB,NR2F6,BMP4,SELE,SERPINE1,CXCL10,NR1D2,INHBB,IL15,NR2F2,F2R,ALDH1A2,GBP2,VCAM1,EDN1,ACER2,GBP6,UCP2,MDK,PDGFB,PDGFA,APOE,NR1D1,CYP26B1,CTGF,CD14,EGR1,STAT1,MMP2"
GO: Biological Process	endothelial cell proliferation	1.36E-08	9.29E-07	13	104	"ZNF580,ITGB3,BMP4,XDH,RGCC,NR2F2,BMPER,ALDH1A2,PDGFB,APOE,CXCL12,CDH13,STAT1"
GO: Biological Process	positive regulation of developmental process	1.98E-08	1.33E-06	38	859	"ACE,PPARG,GJA1,ADA,IRX3,JUNB,HMGA1,ITGB3,BMP4,SERPINE1,INPP5D,RGCC,VIM,IL15,HLA-DQA1,HLA-DMA,MYC,EDN1,ANGPT2,SOCS3,APOE,CXCL12,IGFBP3,MKL2,NPNT,CYR61,DDAH1,SEMA7A,CYP26B1,CTGF,TNFRSF12A,FN1,RHOB,IFI16,ISG15,ZBTB16,CD74,SERPINE2"
GO: Biological Process	regulation of endothelial cell proliferation	2.09E-08	1.38E-06	12	89	"ZNF580,ITGB3,BMP4,XDH,RGCC,NR2F2,ALDH1A2,PDGFB,APOE,CXCL12,CDH13,STAT1"
GO: Biological Process	positive regulation of cell proliferation	2.30E-08	1.49E-06	36	790	"TGM2,TIMP1,ZNF580,CD274,CDKN1A,ODC1,COL18A1,ADA,BCL2L1,ITGB3,BMP4,CXCL10,FABP4,VIM,IL15,APLN,F2R,ALDH1A2,TSC22D1,VCAM1,MYC,EDN1,ACER2,S100A6,PDGFB,PDGFA,CXCL12,IGF2,CYR61,CTGF,PLAU,CDH13,EGR1,NMB,STAT1,CD74"
GO: Biological Process	positive regulation of response to external stimulus	2.42E-08	1.55E-06	17	197	"TGM2,IL33,ACE,ZNF580,DHX58,SERPINE1,CXCL10,FABP4,IL15,EDN1,DDX60,PDGFB,CXCL12,FN1,CTSS,CDH13,CD74"
GO: Biological Process	regulation of innate immune response	3.06E-08	1.93E-06	20	278	"PPARG,PARP9,DHX58,TRAFD1,USP18,IRF7,TRIL,NLRC5,HLA-A,RSAD2,DDX60,SOCS3,TAP1,NR1D1,CD14,CTSS,IFI16,STAT1,MMP2,CD74"
GO: Biological Process	positive regulation of multicellular organismal process	3.82E-08	2.37E-06	31	627	"IL33,ZNF580,GJA1,DHX58,DBH,ADA,SULF2,ITGB3,BMP4,SERPINE1,IRF7,P2RY2,RGCC,INHBB,IL15,APLN,F2R,MYC,GPIHBP1,EDN1,RSAD2,DDX60,PDGFB,NPNT,SEMA7A,CTGF,CD14,IFI16,PLAU,ZBTB16,CD74"
GO: Biological Process	negative regulation of immune system process	4.24E-08	2.60E-06	18	230	"IL33,DHX58,CD274,ADA,TRAFD1,BST2,BMP4,INPP5D,HLA-DRB5,HLA-DQB1,HLA-DQA1,HLA-A,TAP1,NR1D1,IFIT1,IFI16,MNDA,CD74"
GO: Biological Process	biological adhesion	4.79E-08	2.89E-06	42	1043	"TGM2,FBLN2,GPR56,COL18A1,ACTN1,ADA,OLR1,ITGB3,ROM1,ITGA1,SELE,SERPINE1,CD93,RGCC,AMIGO2,GBP2,GBP3,VCAM1,ANGPT2,GBP4,ACER2,FBLIM1,GBP6,GBP7,CXCL12,NPNT,CYR61,CTGF,ENTPD1,MGP,ARHGDIB,TNFRSF12A,FN1,LGALS1,LGALS3BP,RHOB,FLRT2,PLAU,CDH13,MMP2,SERPINE2,CD63"
GO: Biological Process	adhesion to symbiont	5.86E-08	3.49E-06	5	8	"GBP2,GBP3,GBP4,GBP6,GBP7"
GO: Biological Process	regulation of body fluid levels	6.97E-08	4.09E-06	31	644	"TIMP1,GJA1,ACTN1,ADA,OLR1,ITGB3,SELE,SERPINE1,XDH,P2RY2,WEE1,INPP5D,PRCP,SLC3A2,APLN,F2R,EDN1,ANGPT2,PDGFB,PDGFA,APOE,IGF2,CYP26B1,ENTPD1,FN1,RHOB,MAFF,PLAU,PROCR,SERPINE2,CD63"
GO: Biological Process	regulation of cell differentiation	7.13E-08	4.12E-06	48	1302	"ACE,ABCA1,PPARG,GPR56,SIK1,ADA,IRX3,JUNB,ITGB3,ZFP36,BMP4,XDH,IRF7,P2RY2,INPP5D,RGCC,NR1D2,VIM,IL15,HLA-DQA1,GPRC5B,HLA-DMA,MYC,EDN1,ERRFI1,SOCS3,APOE,CXCL12,IGFBP3,NPNT,CYR61,SEMA7A,TYROBP,NR1D1,CYP26B1,CTGF,JDP2,TNFRSF12A,FN1,LGALS1,MAFF,IFI16,FLRT2,ISG15,ZBTB16,STAT1,CD74,SERPINE2"
GO: Biological Process	negative regulation of viral process	9.69E-08	5.53E-06	9	50	"OAS1,IFITM3,BST2,ISG20,RSAD2,IFIT1,IFI16,ISG15,OASL"
GO: Biological Process	response to protozoan	1.04E-07	5.83E-06	7	25	"IRGM,IER3,GBP2,GBP3,GBP4,GBP6,GBP7"
GO: Biological Process	positive regulation of intracellular signal transduction	1.10E-07	6.08E-06	32	693	"TGM2,SERINC3,GJA1,DHX58,DAXX,GPR56,GADD45G,ADA,BCL2L1,BST2,ITGA1,BMP4,XDH,CXCL10,NEK6,IL15,F2R,BMPER,EDN1,MAP3K6,DDX60,C1QTNF1,PDGFB,PDGFA,IGF2,IGFBP3,NPNT,SEMA7A,CTGF,LGALS1,CDH13,CD74"
GO: Biological Process	positive regulation of programmed cell death	1.35E-07	7.42E-06	24	426	"TGM2,ACE,STK17B,CDKN1A,COL18A1,UNC5A,SIK1,GADD45G,BCL2L1,ITGA1,BMP4,INPP5D,RGCC,ALDH1A2,TSC22D1,MYC,IGFBP3,CYR61,RHOB,IFIT2,MNDA,ZBTB16,EGR1,MMP2"
GO: Biological Process	regulation of multi-organism process	1.50E-07	8.14E-06	18	250	"B2M,TIMP1,DHX58,OAS1,ADA,IFITM3,BST2,ISG20,P2RY2,IL15,HLA-A,RSAD2,DDX60,GBP6,IFIT1,IFI16,ISG15,OASL"
GO: Biological Process	secretion	1.55E-07	8.28E-06	39	969	"IL33,ACE,ABCA1,PIM3,PPARG,TIMP1,CD274,ACTN1,KCNB1,ADA,ITGB3,SERPINE1,XDH,P2RY2,RGCC,CXCL10,INHBB,HLA-DRB5,APLN,F2R,MTNR1B,MYC,EDN1,RSAD2,LY6E,UCP2,PDGFB,PDGFA,CXCL12,IGF2,NR1D1,CTGF,CD14,FN1,NMB,MYRIP,CD74,SERPINE2,CD63"
GO: Biological Process	response to alcohol	1.81E-07	9.53E-06	19	281	"ABCA1,DBH,CDKN1A,JUNB,BMP4,CXCL10,INHBB,IL15,NR2F2,ALDH1A2,VCAM1,EDN1,PDGFB,PDGFA,APOE,CTGF,CD14,EGR1,MMP2"
GO: Biological Process	endothelial cell migration	1.83E-07	9.53E-06	13	129	"ZNF580,ITGB3,BMP4,RGCC,PRCP,NR2F2,BMPER,EDN1,ANGPT2,PDGFB,APOE,CDH13,STAT1"
GO: Biological Process	regulation of endothelial cell migration	2.03E-07	1.05E-05	11	89	"ZNF580,ITGB3,BMP4,RGCC,PRCP,NR2F2,BMPER,EDN1,ANGPT2,PDGFB,APOE"
GO: Biological Process	cellular response to lipid	2.13E-07	1.08E-05	20	313	"CMPK2,ABCA1,PPARG,NR2F6,BMP4,SERPINE1,NR1D2,INHBB,IL15,NR2F2,ALDH1A2,GBP2,GBP6,APOE,NR1D1,CYP26B1,CD14,EGR1,STAT1,MMP2"
GO: Biological Process	regulation of viral genome replication	2.29E-07	1.15E-05	9	55	"OAS1,IFITM3,BST2,ISG20,RSAD2,IFIT1,IFI16,ISG15,OASL"
GO: Biological Process	tissue remodeling	2.42E-07	1.20E-05	14	155	"TGM2,ACE,GJA1,DBH,BGN,ITGB3,XDH,INPP5D,IL15,F2R,ANGPT2,ELN,CTSS,MMP2"
GO: Biological Process	negative regulation of protein metabolic process	3.05E-07	1.50E-05	28	581	"TIMP1,CDKN1A,GADD45G,ITGB3,ZFP36,BMP4,SERPINE1,XDH,CIRBP,INPP5D,INHBB,FABP4,NR2F2,PSMB8,PSMB9,EDN1,ACER2,ERRFI1,GBP6,UCHL1,SOCS3,APOE,IGF2BP1,IGFBP3,ITPRIP,ISG15,SERPINE2,DDIT4"
GO: Biological Process	positive regulation of immune response	3.16E-07	1.54E-05	26	513	"IL33,B2M,DHX58,CFB,ADA,IRF7,TRIL,INPP5D,RGCC,HLA-E,HLA-DRB5,IL15,HLA-DQB1,HLA-DQA1,HLA-A,HLA-DMA,RSAD2,DDX60,TAP1,NR1D1,CD14,CTSS,IFI16,MNDA,MMP2,CD74"
GO: Biological Process	negative regulation of coagulation	3.21E-07	1.54E-05	8	42	"SERPINE1,EDN1,PDGFB,PDGFA,APOE,PLAU,PROCR,SERPINE2"
GO: Biological Process	positive regulation of cell migration	3.45E-07	1.63E-05	19	293	"ZNF580,COL18A1,ITGB3,BMP4,SELE,SERPINE1,P2RY2,CXCL10,F2R,EDN1,PDGFB,PDGFA,CXCL12,CYR61,FN1,PLAU,CDH13,MMP2,CD74"
GO: Biological Process	positive regulation of apoptotic process	3.94E-07	1.83E-05	23	419	"TGM2,ACE,STK17B,COL18A1,UNC5A,SIK1,GADD45G,BCL2L1,ITGA1,BMP4,INPP5D,RGCC,ALDH1A2,TSC22D1,MYC,IGFBP3,CYR61,RHOB,IFIT2,MNDA,ZBTB16,EGR1,MMP2"
GO: Biological Process	response to interferon-alpha	3.95E-07	1.83E-05	6	19	"OAS1,IFITM3,BST2,MX2,IFIT3,IFIT2"
GO: Biological Process	positive regulation of cell differentiation	4.06E-07	1.86E-05	29	625	"ACE,PPARG,ADA,IRX3,JUNB,ITGB3,BMP4,INPP5D,RGCC,VIM,IL15,HLA-DQA1,HLA-DMA,SOCS3,APOE,CXCL12,IGFBP3,NPNT,CYR61,SEMA7A,CYP26B1,CTGF,TNFRSF12A,FN1,IFI16,ISG15,ZBTB16,CD74,SERPINE2"
GO: Biological Process	regulation of epithelial cell migration	4.10E-07	1.86E-05	12	116	"ZNF580,ITGB3,BMP4,RGCC,PRCP,NR2F2,BMPER,EDN1,ANGPT2,PDGFB,APOE,CD63"
GO: Biological Process	positive regulation of cell motility	4.46E-07	2.00E-05	19	298	"ZNF580,COL18A1,ITGB3,BMP4,SELE,SERPINE1,P2RY2,CXCL10,F2R,EDN1,PDGFB,PDGFA,CXCL12,CYR61,FN1,PLAU,CDH13,MMP2,CD74"
GO: Biological Process	regulation of cell proliferation involved in kidney development	4.65E-07	2.04E-05	5	11	"BMP4,MYC,PDGFB,PDGFA,EGR1"
GO: Biological Process	cell proliferation involved in metanephros development	4.65E-07	2.04E-05	5	11	"GPC3,MYC,PDGFB,EGR1,STAT1"
GO: Biological Process	response to oxygen levels	4.97E-07	2.16E-05	18	271	"CDKN1A,ADA,RGCC,CLCA1,VCAM1,EDN1,ANGPT2,UCK2,UCP2,PDGFB,PDGFA,CXCL12,CTGF,PLAU,EGR1,PDLIM1,MMP2,DDIT4"
GO: Biological Process	leukocyte migration	5.47E-07	2.36E-05	19	302	"IL33,ZNF580,DBH,ADA,OLR1,ITGB3,ITGA1,SELE,SERPINE1,INPP5D,CXCL10,SLC3A2,VCAM1,EDN1,ANGPT2,PDGFB,CXCL12,FN1,CD74"
GO: Biological Process	blood circulation	5.70E-07	2.43E-05	23	428	"ACE,PPARG,GJA1,ACTA2,DBH,ADA,OLR1,ITGA1,P2RY2,IER3,CXCL10,PRCP,APLN,F2R,EDN1,PDGFB,APOE,CXCL12,DDAH1,CTGF,ELN,STAT1,MMP2"
GO: Biological Process	epithelial cell migration	6.04E-07	2.52E-05	14	167	"ZNF580,ITGB3,BMP4,RGCC,PRCP,NR2F2,BMPER,EDN1,ANGPT2,PDGFB,APOE,CDH13,STAT1,CD63"
GO: Biological Process	epithelium migration	6.04E-07	2.52E-05	14	167	"ZNF580,ITGB3,BMP4,RGCC,PRCP,NR2F2,BMPER,EDN1,ANGPT2,PDGFB,APOE,CDH13,STAT1,CD63"
GO: Biological Process	circulatory system process	6.18E-07	2.56E-05	23	430	"ACE,PPARG,GJA1,ACTA2,DBH,ADA,OLR1,ITGA1,P2RY2,IER3,CXCL10,PRCP,APLN,F2R,EDN1,PDGFB,APOE,CXCL12,DDAH1,CTGF,ELN,STAT1,MMP2"
GO: Biological Process	extracellular matrix organization	6.27E-07	2.57E-05	20	335	"FBLN2,TIMP1,COL18A1,ACTN1,BGN,SULF2,ITGB3,BMP4,SERPINE1,RGCC,PDGFB,PDGFA,COL4A1,COL4A2,NPNT,CYR61,CTGF,FN1,ELN,MMP2"
GO: Biological Process	extracellular structure organization	6.57E-07	2.67E-05	20	336	"FBLN2,TIMP1,COL18A1,ACTN1,BGN,SULF2,ITGB3,BMP4,SERPINE1,RGCC,PDGFB,PDGFA,COL4A1,COL4A2,NPNT,CYR61,CTGF,FN1,ELN,MMP2"
GO: Biological Process	positive regulation of cellular component movement	6.67E-07	2.68E-05	19	306	"ZNF580,COL18A1,ITGB3,BMP4,SELE,SERPINE1,P2RY2,CXCL10,F2R,EDN1,PDGFB,PDGFA,CXCL12,CYR61,FN1,PLAU,CDH13,MMP2,CD74"
GO: Biological Process	nephron development	6.73E-07	2.68E-05	11	100	"GPC3,ACTA2,IRX3,SULF2,BMP4,ANGPT2,PDGFB,PDGFA,EGR1,AQP11,STAT1"
GO: Biological Process	negative regulation of cellular component movement	7.49E-07	2.96E-05	14	170	"IL33,TIMP1,GPR56,ACTN1,ADA,BST2,SERPINE1,RGCC,NR2F2,ANGPT2,PDGFB,APOE,IGFBP3,CD63"
GO: Biological Process	renal system development	7.60E-07	2.97E-05	18	279	"ACE,GPC3,ACTA2,ODC1,IRX3,SULF2,BMP4,BMPER,ALDH1A2,MYC,ANGPT2,PDGFB,PDGFA,NPNT,ZBTB16,EGR1,AQP11,STAT1"
GO: Biological Process	glomerulus vasculature development	7.69E-07	2.97E-05	6	21	"ACTA2,BMP4,ANGPT2,PDGFB,PDGFA,EGR1"
GO: Biological Process	positive regulation of locomotion	7.73E-07	2.97E-05	19	309	"ZNF580,COL18A1,ITGB3,BMP4,SELE,SERPINE1,P2RY2,CXCL10,F2R,EDN1,PDGFB,PDGFA,CXCL12,CYR61,FN1,PLAU,CDH13,MMP2,CD74"
GO: Biological Process	antigen processing and presentation of exogenous peptide antigen	8.04E-07	3.06E-05	14	171	"B2M,IFI30,CYBB,HLA-E,HLA-DRB5,HLA-DQB1,HLA-DQA1,HLA-A,HLA-DMA,PSMB8,PSMB9,TAP1,CTSS,CD74"
GO: Biological Process	response to abiotic stimulus	8.34E-07	3.14E-05	38	995	"PPARG,GPC3,GJA1,DBH,CDKN1A,COL18A1,ADA,BCL2L1,JUNB,NR2F6,CIRBP,RGCC,CXCL10,INHBB,CLCA1,VCAM1,MYC,EDN1,ANGPT2,PER1,UCK2,UCP2,PDGFB,PDGFA,APOE,CXCL12,CTGF,CD14,RHOB,IFI16,PLAU,EGR1,CRY2,PDLIM1,STAT1,MMP2,SERPINE2,DDIT4"
GO: Biological Process	tissue migration	8.63E-07	3.22E-05	14	172	"ZNF580,ITGB3,BMP4,RGCC,PRCP,NR2F2,BMPER,EDN1,ANGPT2,PDGFB,APOE,CDH13,STAT1,CD63"
GO: Biological Process	defense response to protozoan	1.04E-06	3.77E-05	6	22	"IRGM,GBP2,GBP3,GBP4,GBP6,GBP7"
GO: Biological Process	kidney vasculature development	1.04E-06	3.77E-05	6	22	"ACTA2,BMP4,ANGPT2,PDGFB,PDGFA,EGR1"
GO: Biological Process	renal system vasculature development	1.04E-06	3.77E-05	6	22	"ACTA2,BMP4,ANGPT2,PDGFB,PDGFA,EGR1"
GO: Biological Process	negative regulation of multi-organism process	1.04E-06	3.77E-05	10	84	"DHX58,OAS1,IFITM3,BST2,ISG20,RSAD2,IFIT1,IFI16,ISG15,OASL"
GO: Biological Process	hemopoiesis	1.09E-06	3.89E-05	29	656	"ACE,B2M,PPARG,GPC3,TIMP1,GADD45G,ADA,JUNB,ITGB3,ZFP36,BMP4,IRF7,INPP5D,IL15,HLA-DQB1,HLA-DQA1,HLA-DMA,VCAM1,MYC,ANGPT2,RSAD2,PDGFB,TYROBP,LGALS1,IFI16,ISG15,ZBTB16,EGR1,CD74"
GO: Biological Process	blood coagulation	1.23E-06	4.35E-05	25	516	"TIMP1,ACTN1,OLR1,ITGB3,SELE,SERPINE1,WEE1,INPP5D,PRCP,SLC3A2,F2R,EDN1,ANGPT2,PDGFB,PDGFA,APOE,IGF2,ENTPD1,FN1,RHOB,MAFF,PLAU,PROCR,SERPINE2,CD63"
GO: Biological Process	glomerular mesangium development	1.26E-06	4.43E-05	5	13	"ACTA2,BMP4,PDGFB,PDGFA,EGR1"
GO: Biological Process	antigen processing and presentation of exogenous antigen	1.30E-06	4.48E-05	14	178	"B2M,IFI30,CYBB,HLA-E,HLA-DRB5,HLA-DQB1,HLA-DQA1,HLA-A,HLA-DMA,PSMB8,PSMB9,TAP1,CTSS,CD74"
GO: Biological Process	smooth muscle cell migration	1.30E-06	4.48E-05	8	50	"ACE,ITGB3,SERPINE1,P2RY2,PDGFB,PDGFA,IGFBP3,PLAU"
GO: Biological Process	urogenital system development	1.31E-06	4.48E-05	19	320	"ACE,GPC3,ACTA2,ODC1,IRX3,SULF2,BMP4,BMPER,ALDH1A2,MYC,ANGPT2,PDGFB,PDGFA,NPNT,ZBTB16,EGR1,AQP11,STAT1,MMP2"
GO: Biological Process	kidney development	1.32E-06	4.48E-05	16	232	"ACE,GPC3,ACTA2,ODC1,IRX3,SULF2,BMP4,ALDH1A2,MYC,ANGPT2,PDGFB,PDGFA,ZBTB16,EGR1,AQP11,STAT1"
GO: Biological Process	positive regulation of defense response	1.33E-06	4.48E-05	18	290	"TGM2,IL33,ACE,GJA1,DHX58,SERPINE1,IRF7,TRIL,FABP4,IL15,RSAD2,DDX60,NR1D1,CD14,CTSS,IFI16,MMP2,CD74"
GO: Biological Process	response to organic cyclic compound	1.34E-06	4.48E-05	31	738	"ABCA1,PPARG,CDKN1A,ADA,BCL2L1,JUNB,PLIN2,NR2F6,BMP4,CXCL10,NR1D2,INHBB,SLC3A2,IL15,NR2F2,ALDH1A2,VCAM1,EDN1,ANGPT2,MDK,PDGFB,PDGFA,APOE,IGF2,NR1D1,CTGF,LGALS1,IFIT1,EGR1,STAT1,MMP2"
GO: Biological Process	coagulation	1.36E-06	4.51E-05	25	519	"TIMP1,ACTN1,OLR1,ITGB3,SELE,SERPINE1,WEE1,INPP5D,PRCP,SLC3A2,F2R,EDN1,ANGPT2,PDGFB,PDGFA,APOE,IGF2,ENTPD1,FN1,RHOB,MAFF,PLAU,PROCR,SERPINE2,CD63"
GO: Biological Process	secretion by cell	1.37E-06	4.51E-05	34	855	"IL33,ACE,ABCA1,PIM3,PPARG,TIMP1,CD274,ACTN1,KCNB1,ITGB3,SERPINE1,RGCC,CXCL10,INHBB,HLA-DRB5,APLN,F2R,MTNR1B,EDN1,RSAD2,LY6E,UCP2,PDGFB,PDGFA,CXCL12,IGF2,NR1D1,CTGF,CD14,FN1,NMB,MYRIP,SERPINE2,CD63"
GO: Biological Process	regulation of metanephros development	1.39E-06	4.55E-05	6	23	"BMP4,MYC,PDGFB,PDGFA,EGR1,STAT1"
GO: Biological Process	hemostasis	1.46E-06	4.74E-05	25	521	"TIMP1,ACTN1,OLR1,ITGB3,SELE,SERPINE1,WEE1,INPP5D,PRCP,SLC3A2,F2R,EDN1,ANGPT2,PDGFB,PDGFA,APOE,IGF2,ENTPD1,FN1,RHOB,MAFF,PLAU,PROCR,SERPINE2,CD63"
GO: Biological Process	regulation of transport	1.59E-06	5.12E-05	47	1404	"IL33,ACE,ABCA1,PIM3,PPARG,GPC3,GJA1,CD274,CDKN1A,KCNB1,SIK1,KCND3,ADA,CYBB,BST2,ITGB3,BMP4,SELE,SERPINE1,P2RY2,MX2,IER3,RGCC,CXCL10,INHBB,HLA-DRB5,APLN,F2R,MTNR1B,MYC,EDN1,EHD4,RSAD2,GBP6,UCP2,PDGFB,APOE,CXCL12,NR1D1,CD14,CDH13,CRY2,NMB,MYRIP,CD74,SERPINE2,CD63"
GO: Biological Process	viral genome replication	1.67E-06	5.35E-05	9	69	"OAS1,IFITM3,BST2,ISG20,RSAD2,IFIT1,IFI16,ISG15,OASL"
GO: Biological Process	"symbiosis, encompassing mutualism through parasitism"	1.77E-06	5.58E-05	31	748	"B2M,DHX58,DAXX,OAS1,CYBB,IFITM3,BCL2L1,BST2,HMGA1,ITGB3,CD93,IRF7,ISG20,VIM,GBP2,GBP3,HLA-A,VCAM1,MYC,PSMB8,PSMB9,RSAD2,GBP4,GBP6,GBP7,TAP1,IFIT1,IFI16,ISG15,OASL,STAT1"
GO: Biological Process	interspecies interaction between organisms	1.77E-06	5.58E-05	31	748	"B2M,DHX58,DAXX,OAS1,CYBB,IFITM3,BCL2L1,BST2,HMGA1,ITGB3,CD93,IRF7,ISG20,VIM,GBP2,GBP3,HLA-A,VCAM1,MYC,PSMB8,PSMB9,RSAD2,GBP4,GBP6,GBP7,TAP1,IFIT1,IFI16,ISG15,OASL,STAT1"
GO: Biological Process	response to bacterium	1.88E-06	5.86E-05	22	425	"CMPK2,ACE,B2M,ABCA1,SELE,SERPINE1,IRGM,CXCL10,HLA-DRB5,F2R,GBP2,GBP3,HLA-A,VCAM1,EDN1,GBP4,GBP6,GBP7,NR1D1,CD14,ISG15,STAT1"
GO: Biological Process	regeneration	1.94E-06	6.01E-05	12	134	"ACE,PPARG,GJA1,RTN4RL2,CDKN1A,ANGPT2,UCP2,APOE,CXCL12,FPGS,PLAU,MMP2"
GO: Biological Process	positive regulation of adaptive immune response	2.14E-06	6.58E-05	9	71	"B2M,ADA,HLA-E,HLA-DQB1,HLA-A,HLA-DMA,RSAD2,TAP1,CD74"
GO: Biological Process	negative regulation of cell migration	2.17E-06	6.65E-05	13	160	"IL33,TIMP1,GPR56,ADA,BST2,SERPINE1,RGCC,NR2F2,ANGPT2,PDGFB,APOE,IGFBP3,CD63"
GO: Biological Process	negative regulation of cell activation	2.26E-06	6.88E-05	12	136	"CD274,BMP4,INPP5D,HLA-DRB5,HLA-DQB1,HLA-DQA1,PDGFB,PDGFA,APOE,MNDA,CD74,SERPINE2"
GO: Biological Process	negative regulation of locomotion	2.34E-06	7.06E-05	14	187	"IL33,TIMP1,GPR56,ADA,IFITM3,BST2,SERPINE1,RGCC,NR2F2,ANGPT2,PDGFB,APOE,IGFBP3,CD63"
GO: Biological Process	regulation of phosphorylation	2.70E-06	8.05E-05	41	1171	"DAXX,HSPA2,CDKN1A,GADD45G,ITGB3,ITGA1,BMP4,XDH,CKS1B,NLRC5,RGCC,CXCL10,FABP4,IL15,APLN,NR2F2,F2R,BMPER,MYC,EDN1,EHD4,MAP3K6,ERRFI1,GBP6,C1QTNF1,UCHL1,PDGFB,PDGFA,SOCS3,APOE,IGF2,IGFBP3,CCNY,NPNT,CYR61,SEMA7A,CTGF,ITPRIP,PIM1,CD74,DDIT4"
GO: Biological Process	regulation of coagulation	2.71E-06	8.05E-05	9	73	"SERPINE1,F2R,EDN1,PDGFB,PDGFA,APOE,PLAU,PROCR,SERPINE2"
GO: Biological Process	antigen processing and presentation of peptide antigen	2.82E-06	8.33E-05	14	190	"B2M,IFI30,CYBB,HLA-E,HLA-DRB5,HLA-DQB1,HLA-DQA1,HLA-A,HLA-DMA,PSMB8,PSMB9,TAP1,CTSS,CD74"
GO: Biological Process	adhesion to other organism involved in symbiotic interaction	2.86E-06	8.34E-05	5	15	"GBP2,GBP3,GBP4,GBP6,GBP7"
GO: Biological Process	negative regulation of cell motility	2.86E-06	8.34E-05	13	164	"IL33,TIMP1,GPR56,ADA,BST2,SERPINE1,RGCC,NR2F2,ANGPT2,PDGFB,APOE,IGFBP3,CD63"
GO: Biological Process	regulation of protein phosphorylation	2.92E-06	8.44E-05	36	966	"DAXX,HSPA2,CDKN1A,GADD45G,ITGB3,ITGA1,BMP4,XDH,CKS1B,RGCC,CXCL10,FABP4,IL15,NR2F2,F2R,BMPER,EDN1,EHD4,MAP3K6,ERRFI1,GBP6,UCHL1,PDGFB,PDGFA,SOCS3,APOE,IGF2,IGFBP3,CCNY,CYR61,SEMA7A,CTGF,ITPRIP,PIM1,CD74,DDIT4"
GO: Biological Process	regulation of protein modification process	3.01E-06	8.64E-05	42	1219	"DAXX,HSPA2,CDKN1A,GADD45G,ITGB3,ITGA1,BMP4,XDH,CKS1B,RGCC,CXCL10,FABP4,IL15,NR2F2,F2R,BMPER,PSMB8,PSMB9,EDN1,EHD4,ACER2,MAP3K6,ERRFI1,GBP6,UCHL1,PDGFB,PDGFA,SOCS3,APOE,IGF2,IGFBP3,CCNY,CYR61,SEMA7A,CTGF,JDP2,ITPRIP,ISG15,PIM1,EGR1,CD74,DDIT4"
GO: Biological Process	negative regulation of response to stimulus	3.09E-06	8.81E-05	38	1051	"IL33,PPARG,GPC3,DHX58,PMEPA1,ADA,TRAFD1,BCL2L1,SULF2,ZFP36,ITGA1,BMP4,SERPINE1,XDH,IER3,INPP5D,NLRC5,BMPER,HLA-A,MYC,ANGPT2,ERRFI1,UCHL1,SOCS3,APOE,CXCL12,IGFBP3,TAP1,NR1D1,CYP26B1,ITPRIP,IFIT1,IFI16,EGR1,STAT1,CD74,SERPINE2,DDIT4"
GO: Biological Process	negative regulation of hemostasis	3.26E-06	9.14E-05	7	40	"SERPINE1,EDN1,PDGFB,PDGFA,APOE,PLAU,SERPINE2"
GO: Biological Process	negative regulation of blood coagulation	3.26E-06	9.14E-05	7	40	"SERPINE1,EDN1,PDGFB,PDGFA,APOE,PLAU,SERPINE2"
GO: Biological Process	antigen processing and presentation	3.27E-06	9.14E-05	15	220	"B2M,IFI30,CYBB,HLA-E,HLA-DRB5,HLA-DQB1,HLA-DQA1,HLA-A,HLA-DMA,PSMB8,PSMB9,TAP1,CTSS,PROCR,CD74"
GO: Biological Process	leukocyte differentiation	3.29E-06	9.15E-05	22	440	"B2M,PPARG,GPC3,GADD45G,ADA,JUNB,ITGB3,BMP4,IRF7,INPP5D,IL15,HLA-DQB1,HLA-DQA1,HLA-DMA,VCAM1,MYC,RSAD2,TYROBP,LGALS1,IFI16,EGR1,CD74"
GO: Biological Process	hematopoietic or lymphoid organ development	3.41E-06	9.41E-05	29	695	"ACE,B2M,PPARG,GPC3,TIMP1,GADD45G,ADA,JUNB,ITGB3,ZFP36,BMP4,IRF7,INPP5D,IL15,HLA-DQB1,HLA-DQA1,HLA-DMA,VCAM1,MYC,ANGPT2,RSAD2,PDGFB,TYROBP,LGALS1,IFI16,ISG15,ZBTB16,EGR1,CD74"
GO: Biological Process	negative regulation of cellular protein metabolic process	3.57E-06	9.78E-05	24	512	"TIMP1,CDKN1A,GADD45G,ZFP36,BMP4,XDH,CIRBP,FABP4,NR2F2,PSMB8,PSMB9,EDN1,ACER2,ERRFI1,GBP6,UCHL1,SOCS3,APOE,IGF2BP1,IGFBP3,ITPRIP,ISG15,SERPINE2,DDIT4"
GO: Biological Process	wound healing	3.60E-06	9.81E-05	28	659	"TIMP1,GJA1,ACTN1,OLR1,ITGB3,SELE,SERPINE1,WEE1,INPP5D,PRCP,SLC3A2,F2R,MYC,EDN1,ANGPT2,PDGFB,PDGFA,APOE,IGF2,CYR61,ENTPD1,FN1,RHOB,MAFF,PLAU,PROCR,SERPINE2,CD63"
GO: Biological Process	negative regulation of defense response	3.82E-06	1.03E-04	11	119	"PPARG,DHX58,ADA,TRAFD1,ZFP36,IER3,HLA-A,APOE,TAP1,IFIT1,IFI16"
GO: Biological Process	monocyte differentiation	3.86E-06	1.04E-04	6	27	"PPARG,BMP4,IRF7,INPP5D,MYC,IFI16"
GO: Biological Process	ameboidal cell migration	3.87E-06	1.04E-04	16	252	"TIMP1,ZNF580,ITGB3,BMP4,RGCC,PRCP,NR2F2,BMPER,EDN1,ANGPT2,PDGFB,APOE,CXCL12,CDH13,STAT1,CD63"
GO: Biological Process	muscle cell migration	4.16E-06	1.10E-04	8	58	"ACE,ITGB3,SERPINE1,P2RY2,PDGFB,PDGFA,IGFBP3,PLAU"
GO: Biological Process	regulation of inflammatory response	4.51E-06	1.19E-04	16	255	"TGM2,IL33,ACE,PPARG,CFB,ADA,ZFP36,SELE,SERPINE1,IER3,NR1D2,FABP4,IL15,APOE,SEMA7A,CTSS"
GO: Biological Process	regulation of glomerular mesangial cell proliferation	4.52E-06	1.19E-04	4	8	"BMP4,PDGFB,PDGFA,EGR1"
GO: Biological Process	regulation of lymphocyte proliferation	4.85E-06	1.26E-04	13	172	"CD274,CDKN1A,ADA,BMP4,INPP5D,HLA-DRB5,IL15,HLA-DQB1,HLA-DQA1,VCAM1,IGF2,MNDA,CD74"
GO: Biological Process	response to drug	4.95E-06	1.28E-04	21	417	"B2M,ABCA1,PPARG,CDKN1A,COL18A1,ADA,CYBB,JUNB,PLIN2,ABCG2,MYC,EDN1,ACER2,MDK,PDGFB,PDGFA,IGF2,LGALS1,EGR1,STAT1,MMP2"
GO: Biological Process	homeostatic process	5.06E-06	1.30E-04	44	1332	"TGM2,SERPINA3,ABCA1,PIM3,PPARG,TIMP1,GJA1,DBH,ADA,ITGB3,BMP4,XDH,P2RY2,INPP5D,ABCG2,CXCL10,NR1D2,PRCP,FABP4,HLA-DRB5,APLN,F2R,MTNR1B,VCAM1,MYC,GPIHBP1,EDN1,UCP2,APOE,CXCL12,FITM2,TAP1,NR1D1,MALL,CYP26B1,CTGF,LGALS1,CTSS,IFIT1,ISG15,QSOX1,NMB,AQP11,CD74"
GO: Biological Process	regulation of cell activation	5.14E-06	1.32E-04	21	418	"IL33,CD274,CDKN1A,ADA,BMP4,INPP5D,HLA-DRB5,IL15,HLA-DQB1,HLA-DQA1,HLA-DMA,VCAM1,PDGFB,PDGFA,APOE,IGF2,CTGF,LGALS1,MNDA,CD74,SERPINE2"
GO: Biological Process	regulation of mononuclear cell proliferation	5.17E-06	1.32E-04	13	173	"CD274,CDKN1A,ADA,BMP4,INPP5D,HLA-DRB5,IL15,HLA-DQB1,HLA-DQA1,VCAM1,IGF2,MNDA,CD74"
GO: Biological Process	cell adhesion	5.34E-06	1.35E-04	37	1034	"TGM2,FBLN2,GPR56,COL18A1,ACTN1,ADA,OLR1,ITGB3,ROM1,ITGA1,SELE,SERPINE1,CD93,RGCC,AMIGO2,VCAM1,ANGPT2,ACER2,FBLIM1,CXCL12,NPNT,CYR61,CTGF,ENTPD1,MGP,ARHGDIB,TNFRSF12A,FN1,LGALS1,LGALS3BP,RHOB,FLRT2,PLAU,CDH13,MMP2,SERPINE2,CD63"
GO: Biological Process	regulation of blood vessel size	5.48E-06	1.37E-04	12	148	"ACE,GJA1,ACTA2,DBH,ITGA1,P2RY2,APLN,F2R,EDN1,PDGFB,APOE,MMP2"
GO: Biological Process	response to decreased oxygen levels	5.50E-06	1.37E-04	16	259	"ADA,RGCC,CLCA1,VCAM1,EDN1,ANGPT2,UCP2,PDGFB,PDGFA,CXCL12,CTGF,PLAU,EGR1,PDLIM1,MMP2,DDIT4"
GO: Biological Process	antigen processing and presentation of exogenous peptide antigen via MHC class I	5.86E-06	1.45E-04	9	80	"B2M,IFI30,CYBB,HLA-E,HLA-A,PSMB8,PSMB9,TAP1,CTSS"
GO: Biological Process	regulation of tube size	5.87E-06	1.45E-04	12	149	"ACE,GJA1,ACTA2,DBH,ITGA1,P2RY2,APLN,F2R,EDN1,PDGFB,APOE,MMP2"
GO: Biological Process	regulation of anatomical structure morphogenesis	5.90E-06	1.45E-04	29	715	"SYNE3,GPC3,GJA1,BMP4,SERPINE1,XDH,SHROOM3,RGCC,CXCL10,VIM,MYC,EDN1,ANGPT2,GAS7,FBLIM1,PDGFA,APOE,CXCL12,FITM2,COL4A2,CDC42EP4,DDAH1,SEMA7A,TNFRSF12A,FN1,RHOB,CDC42EP3,PLAU,STAT1"
GO: Biological Process	regulation of adaptive immune response	6.65E-06	1.62E-04	11	126	"IL33,B2M,ADA,IRF7,HLA-E,HLA-DQB1,HLA-A,HLA-DMA,RSAD2,TAP1,CD74"
GO: Biological Process	regulation of leukocyte proliferation	7.06E-06	1.71E-04	13	178	"CD274,CDKN1A,ADA,BMP4,INPP5D,HLA-DRB5,IL15,HLA-DQB1,HLA-DQA1,VCAM1,IGF2,MNDA,CD74"
GO: Biological Process	regulation of smooth muscle cell migration	7.40E-06	1.79E-04	7	45	"ACE,SERPINE1,P2RY2,PDGFB,PDGFA,IGFBP3,PLAU"
GO: Biological Process	regulation of behavior	7.97E-06	1.90E-04	13	180	"ZNF580,GJA1,ADA,SERPINE1,CXCL10,EDN1,ANGPT2,MDK,PDGFB,CXCL12,FN1,CDH13,CD74"
GO: Biological Process	"antigen processing and presentation of exogenous peptide antigen via MHC class I, TAP-independent"	8.04E-06	1.90E-04	4	9	"B2M,HLA-E,HLA-A,CTSS"
GO: Biological Process	glomerular mesangial cell proliferation	8.04E-06	1.90E-04	4	9	"BMP4,PDGFB,PDGFA,EGR1"
GO: Biological Process	negative regulation of platelet activation	8.04E-06	1.90E-04	4	9	"PDGFB,PDGFA,APOE,SERPINE2"
GO: Biological Process	response to endogenous stimulus	8.56E-06	2.00E-04	44	1360	"SERPINA3,ABCA1,PPARG,TIMP1,GJA1,DBH,PMEPA1,CDKN1A,CFB,ADA,BCL2L1,JUNB,KLF9,SULF2,NR2F6,BMP4,SERPINE1,NR1D2,INHBB,PRCP,NR2F2,ALDH1A2,VCAM1,MYC,GPIHBP1,EDN1,UCP2,MDK,PDGFB,PDGFA,SOCS3,APOE,CXCL12,COL4A1,IGF2,COL4A2,NPNT,NR1D1,CTGF,CTSS,CDH13,EGR1,STAT1,MMP2"
GO: Biological Process	blood vessel remodeling	8.61E-06	2.00E-04	7	46	"TGM2,ACE,GJA1,DBH,BGN,ANGPT2,ELN"
GO: Biological Process	epithelium development	8.62E-06	2.00E-04	32	849	"TGM2,PPARG,GPC3,GJA1,ACTA2,COL18A1,IRX3,BMP4,XDH,SHROOM3,VIM,NR2F2,ALDH1A2,VCAM1,MYC,EDN1,ERRFI1,PDGFB,PDGFA,SOCS3,CXCL12,COL4A1,NPNT,CYR61,CYP26B1,MGP,MAFF,AQP11,STAT1,MMP2,SERPINE2,CD63"
GO: Biological Process	vasoconstriction	8.79E-06	2.03E-04	9	84	"ACE,GJA1,ACTA2,DBH,APLN,F2R,EDN1,PDGFB,MMP2"
GO: Biological Process	mononuclear cell proliferation	9.40E-06	2.16E-04	15	240	"ACE,CD274,CDKN1A,ADA,BMP4,INPP5D,HLA-DRB5,IL15,HLA-DQB1,HLA-DQA1,VCAM1,CXCL12,IGF2,MNDA,CD74"
GO: Biological Process	platelet degranulation	9.69E-06	2.21E-04	9	85	"TIMP1,ACTN1,ITGB3,SERPINE1,PDGFB,PDGFA,IGF2,FN1,CD63"
GO: Biological Process	regulation of vasoconstriction	9.92E-06	2.24E-04	8	65	"ACE,GJA1,DBH,APLN,F2R,EDN1,PDGFB,MMP2"
GO: Biological Process	positive regulation of adaptive immune response based on somatic recombination of immune receptors built from immunoglobulin superfamily domains	9.92E-06	2.24E-04	8	65	"B2M,ADA,HLA-E,HLA-DQB1,HLA-A,HLA-DMA,RSAD2,TAP1"
GO: Biological Process	regulation of intracellular signal transduction	9.96E-06	2.24E-04	45	1413	"TGM2,ABCA1,CHN2,SERINC3,GJA1,DHX58,DAXX,GPR56,GADD45G,ADA,BCL2L1,BST2,ITGA1,BMP4,XDH,CXCL10,NEK6,IL15,F2R,BMPER,MYC,EDN1,MAP3K6,DDX60,ERRFI1,C1QTNF1,UCHL1,PDGFB,PDGFA,APOE,CXCL12,IGF2,IGFBP3,NPNT,CYR61,SEMA7A,CTGF,ARHGDIB,LGALS1,RHOB,CDH13,STAT1,CD74,SERPINE2,DDIT4"
GO: Biological Process	regulation of anatomical structure size	1.03E-05	2.30E-04	19	369	"ACE,GJA1,ACTA2,DBH,ITGA1,P2RY2,APLN,F2R,CAPG,EDN1,PDGFB,APOE,CXCL12,SEMA7A,SHROOM2,TNFRSF12A,FN1,ELN,MMP2"
GO: Biological Process	immune system development	1.08E-05	2.39E-04	29	738	"ACE,B2M,PPARG,GPC3,TIMP1,GADD45G,ADA,JUNB,ITGB3,ZFP36,BMP4,IRF7,INPP5D,IL15,HLA-DQB1,HLA-DQA1,HLA-DMA,VCAM1,MYC,ANGPT2,RSAD2,PDGFB,TYROBP,LGALS1,IFI16,ISG15,ZBTB16,EGR1,CD74"
GO: Biological Process	rhythmic process	1.09E-05	2.41E-04	15	243	"DBP,ADA,BCL2L1,NR2F6,BMP4,NR1D2,INHBB,TEF,PER3,MTNR1B,PER1,NR1D1,EGR1,CRY2,MMP2"
GO: Biological Process	positive regulation of phosphate metabolic process	1.17E-05	2.56E-04	32	862	"ABCA1,DAXX,HSPA2,CDKN1A,GADD45G,ITGB3,ITGA1,BMP4,XDH,RGCC,CXCL10,IL15,APLN,F2R,BMPER,MYC,EDN1,EHD4,MAP3K6,C1QTNF1,PDGFB,PDGFA,APOE,IGF2,IGFBP3,CCNY,NPNT,CYR61,SEMA7A,CTGF,PIM1,CD74"
GO: Biological Process	positive regulation of phosphorus metabolic process	1.17E-05	2.56E-04	32	862	"ABCA1,DAXX,HSPA2,CDKN1A,GADD45G,ITGB3,ITGA1,BMP4,XDH,RGCC,CXCL10,IL15,APLN,F2R,BMPER,MYC,EDN1,EHD4,MAP3K6,C1QTNF1,PDGFB,PDGFA,APOE,IGF2,IGFBP3,CCNY,NPNT,CYR61,SEMA7A,CTGF,PIM1,CD74"
GO: Biological Process	positive regulation of catalytic activity	1.27E-05	2.77E-04	37	1075	"PPARG,DAP,CHN2,DAXX,HSPA2,CDKN1A,GADD45G,ITGB3,ITGA1,BMP4,SELE,XDH,RGCC,F2R,MYC,GPIHBP1,PSMB8,PSMB9,EDN1,ACER2,MAP3K6,ERRFI1,PDGFB,PDGFA,APOE,IGF2,IGFBP3,CCNY,NPNT,CYR61,CTGF,FN1,IFI16,MMP17,PIM1,STAT1,CD74"
GO: Biological Process	intracellular receptor signaling pathway	1.28E-05	2.77E-04	16	277	"PPARG,DHX58,DAXX,PMEPA1,BCL2L1,KLF9,NR2F6,IRF7,NR1D2,PRCP,NR2F2,ALDH1A2,DDX60,NR1D1,CYP26B1,CRY2"
GO: Biological Process	antigen processing and presentation of endogenous antigen	1.32E-05	2.85E-04	4	10	"HLA-E,HLA-A,TAP1,CD74"
GO: Biological Process	leukocyte proliferation	1.46E-05	3.12E-04	15	249	"ACE,CD274,CDKN1A,ADA,BMP4,INPP5D,HLA-DRB5,IL15,HLA-DQB1,HLA-DQA1,VCAM1,CXCL12,IGF2,MNDA,CD74"
GO: Biological Process	regulation of immune effector process	1.46E-05	3.12E-04	16	280	"IL33,B2M,DHX58,CFB,BST2,TRIL,HLA-E,IL15,HLA-A,RSAD2,DDX60,GBP6,SEMA7A,TAP1,IFIT1,CD74"
GO: Biological Process	regulation of blood coagulation	1.55E-05	3.28E-04	8	69	"SERPINE1,F2R,EDN1,PDGFB,PDGFA,APOE,PLAU,SERPINE2"
GO: Biological Process	regulation of hemostasis	1.55E-05	3.28E-04	8	69	"SERPINE1,F2R,EDN1,PDGFB,PDGFA,APOE,PLAU,SERPINE2"
GO: Biological Process	negative regulation of secretion	1.56E-05	3.28E-04	12	164	"IL33,PIM3,PPARG,ADA,RGCC,INHBB,F2R,EDN1,RSAD2,UCP2,NMB,CD74"
GO: Biological Process	regulation of cell adhesion	1.66E-05	3.47E-04	17	315	"TGM2,FBLN2,GPR56,ADA,SERPINE1,RGCC,ANGPT2,ACER2,NPNT,CYR61,ARHGDIB,LGALS1,PLAU,CDH13,MMP2,SERPINE2,CD63"
GO: Biological Process	positive regulation of behavior	1.68E-05	3.49E-04	10	114	"ZNF580,GJA1,SERPINE1,CXCL10,EDN1,PDGFB,CXCL12,FN1,CDH13,CD74"
GO: Biological Process	positive regulation of cyclin-dependent protein kinase activity	1.79E-05	3.71E-04	5	21	"HSPA2,RGCC,PDGFB,CCNY,PIM1"
GO: Biological Process	response to acid	1.82E-05	3.75E-04	16	285	"ABCA1,PPARG,COL18A1,BCL2L1,ALDH1A2,EDN1,ACER2,UCP2,PDGFB,PDGFA,APOE,COL4A1,CYP26B1,CTGF,EGR1,MMP2"
GO: Biological Process	regulation of epithelial cell proliferation	1.93E-05	3.94E-04	15	255	"GPC3,ZNF580,ITGB3,BMP4,XDH,RGCC,NR2F2,ALDH1A2,MYC,PDGFB,APOE,CXCL12,PLAU,CDH13,STAT1"
GO: Biological Process	response to hypoxia	1.93E-05	3.94E-04	15	255	"ADA,RGCC,CLCA1,VCAM1,EDN1,ANGPT2,UCP2,PDGFB,PDGFA,CXCL12,PLAU,EGR1,PDLIM1,MMP2,DDIT4"
GO: Biological Process	regulation of transferase activity	2.00E-05	4.06E-04	29	763	"PPARG,DAXX,HSPA2,CDKN1A,GADD45G,ITGB3,ITGA1,BMP4,CKS1B,NLRC5,RGCC,CXCL10,FABP4,NR2F2,F2R,EDN1,MAP3K6,ERRFI1,UCHL1,PDGFB,PDGFA,SOCS3,APOE,IGF2,CCNY,CYR61,ITPRIP,PIM1,CD74"
GO: Biological Process	regulation of peptidase activity	2.01E-05	4.06E-04	18	353	"SERPINA3,PPARG,DAP,GPC3,TIMP1,BCL2L1,BST2,SERPINE1,XDH,F2R,MYC,ACER2,CYR61,CTGF,FN1,IFI16,STAT1,SERPINE2"
GO: Biological Process	circadian rhythm	2.11E-05	4.24E-04	10	117	"DBP,ADA,NR2F6,NR1D2,PER3,MTNR1B,PER1,NR1D1,EGR1,CRY2"
GO: Biological Process	vascular process in circulatory system	2.37E-05	4.74E-04	12	171	"ACE,GJA1,ACTA2,DBH,ITGA1,P2RY2,APLN,F2R,EDN1,PDGFB,APOE,MMP2"
GO: Biological Process	platelet activation	2.39E-05	4.74E-04	14	229	"TIMP1,ACTN1,ITGB3,SERPINE1,F2R,PDGFB,PDGFA,APOE,IGF2,ENTPD1,FN1,RHOB,SERPINE2,CD63"
GO: Biological Process	regulation of smooth muscle cell proliferation	2.40E-05	4.74E-04	9	95	"TGM2,PPARG,BMP4,IL15,EDN1,PDGFB,IGFBP3,CDH13,STAT1"
GO: Biological Process	response to molecule of bacterial origin	2.42E-05	4.74E-04	15	260	"CMPK2,ACE,B2M,ABCA1,SELE,SERPINE1,CXCL10,F2R,GBP2,VCAM1,EDN1,GBP6,NR1D1,CD14,STAT1"
GO: Biological Process	negative regulation of phosphate metabolic process	2.43E-05	4.74E-04	18	358	"CDKN1A,GADD45G,BMP4,XDH,FABP4,NR2F2,MYC,EDN1,ERRFI1,GBP6,UCHL1,PDGFB,PDGFA,SOCS3,APOE,IGFBP3,ITPRIP,DDIT4"
GO: Biological Process	negative regulation of phosphorus metabolic process	2.43E-05	4.74E-04	18	358	"CDKN1A,GADD45G,BMP4,XDH,FABP4,NR2F2,MYC,EDN1,ERRFI1,GBP6,UCHL1,PDGFB,PDGFA,SOCS3,APOE,IGFBP3,ITPRIP,DDIT4"
GO: Biological Process	cell growth	2.55E-05	4.96E-04	20	429	"PPARG,CDKN1A,BST2,SLC3A2,EDN1,CRIM1,PDGFB,APOE,CXCL12,FAM107A,IGFBP3,CYR61,SEMA7A,CTGF,TNFRSF12A,FN1,IFI16,ESM1,CDH13,SERPINE2"
GO: Biological Process	positive regulation of chemotaxis	2.61E-05	5.02E-04	9	96	"ZNF580,SERPINE1,CXCL10,EDN1,PDGFB,CXCL12,FN1,CDH13,CD74"
GO: Biological Process	regulation of wound healing	2.61E-05	5.02E-04	9	96	"SERPINE1,F2R,MYC,EDN1,PDGFB,PDGFA,APOE,PLAU,SERPINE2"
GO: Biological Process	regulation of protein kinase activity	2.62E-05	5.02E-04	27	694	"DAXX,HSPA2,CDKN1A,GADD45G,ITGB3,ITGA1,BMP4,CKS1B,RGCC,CXCL10,FABP4,NR2F2,F2R,EDN1,MAP3K6,ERRFI1,UCHL1,PDGFB,PDGFA,SOCS3,APOE,IGF2,CCNY,CYR61,ITPRIP,PIM1,CD74"
GO: Biological Process	positive regulation of MAPK cascade	2.81E-05	5.36E-04	18	362	"DAXX,GADD45G,ITGA1,BMP4,XDH,F2R,BMPER,EDN1,MAP3K6,C1QTNF1,PDGFB,PDGFA,IGF2,IGFBP3,NPNT,SEMA7A,CTGF,CD74"
GO: Biological Process	zymogen activation	2.82E-05	5.37E-04	10	121	"PPARG,DAP,SERPINE1,XDH,F2R,MYC,ACER2,IFI16,STAT1,SERPINE2"
GO: Biological Process	regulation of vasculature development	2.88E-05	5.44E-04	13	203	"BMP4,SERPINE1,XDH,RGCC,CXCL10,ANGPT2,PDGFB,PDGFA,COL4A2,DDAH1,RHOB,EGR1,STAT1"
GO: Biological Process	negative regulation of innate immune response	2.88E-05	5.44E-04	5	23	"DHX58,TRAFD1,HLA-A,TAP1,IFI16"
GO: Biological Process	regulation of response to cytokine stimulus	3.08E-05	5.76E-04	9	98	"PPARG,PARP9,USP18,IRF7,NLRC5,EDN1,SOCS3,STAT1,CD74"
GO: Biological Process	smooth muscle cell proliferation	3.08E-05	5.76E-04	9	98	"TGM2,PPARG,BMP4,IL15,EDN1,PDGFB,IGFBP3,CDH13,STAT1"
GO: Biological Process	regulation of kinase activity	3.10E-05	5.77E-04	28	741	"DAXX,HSPA2,CDKN1A,GADD45G,ITGB3,ITGA1,BMP4,CKS1B,NLRC5,RGCC,CXCL10,FABP4,NR2F2,F2R,EDN1,MAP3K6,ERRFI1,UCHL1,PDGFB,PDGFA,SOCS3,APOE,IGF2,CCNY,CYR61,ITPRIP,PIM1,CD74"
GO: Biological Process	negative regulation of transport	3.24E-05	5.94E-04	18	366	"IL33,ACE,PIM3,PPARG,ADA,BST2,ITGB3,RGCC,INHBB,F2R,MYC,EDN1,RSAD2,GBP6,UCP2,NMB,CD74,SERPINE2"
GO: Biological Process	glomerulus development	3.25E-05	5.94E-04	7	56	"ACTA2,SULF2,BMP4,ANGPT2,PDGFB,PDGFA,EGR1"
GO: Biological Process	positive regulation of peptidase activity	3.25E-05	5.94E-04	11	149	"PPARG,DAP,XDH,F2R,MYC,ACER2,CYR61,CTGF,FN1,IFI16,STAT1"
GO: Biological Process	reactive oxygen species metabolic process	3.25E-05	5.94E-04	11	149	"CDKN1A,CYBB,XDH,IER3,PRCP,EDN1,PDGFB,CYR61,CTGF,PLAU,DDIT4"
GO: Biological Process	adaptive immune response based on somatic recombination of immune receptors built from immunoglobulin superfamily domains	3.49E-05	6.35E-04	14	237	"IL33,B2M,GADD45G,ADA,IRF7,INPP5D,HLA-E,HLA-DRB5,HLA-DQB1,HLA-A,HLA-DMA,RSAD2,TAP1,CD74"
GO: Biological Process	positive regulation of cell activation	3.59E-05	6.50E-04	15	269	"IL33,CD274,CDKN1A,ADA,INPP5D,HLA-DRB5,IL15,HLA-DQB1,HLA-DQA1,HLA-DMA,VCAM1,IGF2,CTGF,LGALS1,CD74"
GO: Biological Process	negative regulation of apoptotic process	3.60E-05	6.50E-04	27	707	"PIM3,TIMP1,CDKN1A,ADA,BCL2L1,BMP4,SERPINE1,IRF7,IER3,AMIGO2,F2R,TSC22D1,MYC,PSMB8,PSMB9,EDN1,UCP2,MDK,SOCS3,APOE,CXCL12,CYR61,FN1,IFIT3,PIM1,EGR1,CD74"
GO: Biological Process	organ regeneration	3.65E-05	6.53E-04	7	57	"ACE,PPARG,CDKN1A,ANGPT2,UCP2,CXCL12,FPGS"
GO: Biological Process	lymphocyte proliferation	3.65E-05	6.53E-04	14	238	"CD274,CDKN1A,ADA,BMP4,INPP5D,HLA-DRB5,IL15,HLA-DQB1,HLA-DQA1,VCAM1,CXCL12,IGF2,MNDA,CD74"
GO: Biological Process	response to hormone	3.75E-05	6.68E-04	30	831	"SERPINA3,PPARG,TIMP1,GJA1,CDKN1A,CFB,JUNB,KLF9,NR2F6,BMP4,NR1D2,INHBB,PRCP,NR2F2,ALDH1A2,EDN1,UCP2,MDK,PDGFB,PDGFA,SOCS3,APOE,CXCL12,IGF2,NR1D1,CTGF,CTSS,EGR1,STAT1,MMP2"
GO: Biological Process	cellular response to oxygen-containing compound	3.95E-05	6.97E-04	29	792	"CMPK2,ABCA1,PIM3,PPARG,ZNF580,BCL2L1,BMP4,SERPINE1,INHBB,HLA-DRB5,IL15,ALDH1A2,GBP2,VCAM1,GBP6,UCP2,PDGFB,SOCS3,APOE,COL4A1,IGF2,NR1D1,CYP26B1,CD14,LGALS1,RHOB,EGR1,STAT1,MMP2"
GO: Biological Process	chemical homeostasis	3.95E-05	6.97E-04	31	875	"TGM2,ABCA1,PIM3,PPARG,GJA1,DBH,P2RY2,ABCG2,CXCL10,NR1D2,PRCP,FABP4,HLA-DRB5,F2R,MTNR1B,VCAM1,MYC,GPIHBP1,EDN1,UCP2,APOE,CXCL12,FITM2,TAP1,NR1D1,MALL,CYP26B1,LGALS1,IFIT1,NMB,AQP11"
GO: Biological Process	leukocyte activation	3.97E-05	6.97E-04	26	671	"IL33,ACE,B2M,CD274,CDKN1A,GADD45G,ADA,BST2,BMP4,CD93,INPP5D,HLA-DRB5,IL15,HLA-DQB1,HLA-DQA1,HLA-DMA,VCAM1,EDN1,RSAD2,CXCL12,IGF2,TYROBP,LGALS1,MNDA,EGR1,CD74"
GO: Biological Process	positive regulation of cysteine-type endopeptidase activity	4.00E-05	6.98E-04	10	126	"PPARG,DAP,XDH,F2R,MYC,ACER2,CYR61,CTGF,IFI16,STAT1"
GO: Biological Process	regulation of chemotaxis	4.00E-05	6.98E-04	10	126	"ZNF580,SERPINE1,CXCL10,EDN1,ANGPT2,PDGFB,CXCL12,FN1,CDH13,CD74"
GO: Biological Process	adaptive immune response	4.08E-05	7.09E-04	15	272	"IL33,B2M,GADD45G,ADA,IRF7,INPP5D,HLA-E,HLA-DRB5,HLA-DQB1,HLA-A,HLA-DMA,RSAD2,TAP1,CTSS,CD74"
GO: Biological Process	positive regulation of cell proliferation involved in kidney development	4.13E-05	7.14E-04	3	5	"MYC,PDGFB,EGR1"
GO: Biological Process	epithelial cell proliferation	4.15E-05	7.14E-04	16	305	"GPC3,ZNF580,ITGB3,BMP4,XDH,RGCC,NR2F2,BMPER,ALDH1A2,MYC,PDGFB,APOE,CXCL12,PLAU,CDH13,STAT1"
GO: Biological Process	lipid homeostasis	4.24E-05	7.24E-04	9	102	"ABCA1,PPARG,NR1D2,FABP4,GPIHBP1,APOE,FITM2,NR1D1,MALL"
GO: Biological Process	antigen processing and presentation of peptide antigen via MHC class I	4.24E-05	7.24E-04	9	102	"B2M,IFI30,CYBB,HLA-E,HLA-A,PSMB8,PSMB9,TAP1,CTSS"
GO: Biological Process	regulation of glomerulus development	4.33E-05	7.38E-04	4	13	"BMP4,PDGFB,PDGFA,EGR1"
GO: Biological Process	regulation of response to interferon-gamma	4.43E-05	7.52E-04	5	25	"PPARG,PARP9,NLRC5,SOCS3,STAT1"
GO: Biological Process	negative regulation of cell adhesion	4.58E-05	7.68E-04	9	103	"SERPINE1,RGCC,ANGPT2,ACER2,ARHGDIB,LGALS1,CDH13,MMP2,SERPINE2"
GO: Biological Process	negative regulation of mononuclear cell proliferation	4.58E-05	7.68E-04	7	59	"CD274,BMP4,INPP5D,HLA-DRB5,HLA-DQB1,HLA-DQA1,MNDA"
GO: Biological Process	negative regulation of lymphocyte proliferation	4.58E-05	7.68E-04	7	59	"CD274,BMP4,INPP5D,HLA-DRB5,HLA-DQB1,HLA-DQA1,MNDA"
GO: Biological Process	negative regulation of programmed cell death	4.69E-05	7.79E-04	27	718	"PIM3,TIMP1,CDKN1A,ADA,BCL2L1,BMP4,SERPINE1,IRF7,IER3,AMIGO2,F2R,TSC22D1,MYC,PSMB8,PSMB9,EDN1,UCP2,MDK,SOCS3,APOE,CXCL12,CYR61,FN1,IFIT3,PIM1,EGR1,CD74"
GO: Biological Process	regulation of cell growth	4.71E-05	7.79E-04	17	342	"PPARG,CDKN1A,BST2,CRIM1,APOE,CXCL12,FAM107A,IGFBP3,CYR61,SEMA7A,CTGF,TNFRSF12A,FN1,IFI16,ESM1,CDH13,SERPINE2"
GO: Biological Process	regulation of protein serine/threonine kinase activity	4.71E-05	7.79E-04	19	412	"DAXX,HSPA2,CDKN1A,GADD45G,ITGA1,BMP4,CKS1B,RGCC,NR2F2,EDN1,MAP3K6,UCHL1,PDGFB,PDGFA,APOE,IGF2,CCNY,PIM1,CD74"
GO: Biological Process	response to lipopolysaccharide	4.79E-05	7.90E-04	14	244	"CMPK2,ACE,ABCA1,SELE,SERPINE1,CXCL10,F2R,GBP2,VCAM1,EDN1,GBP6,NR1D1,CD14,STAT1"
GO: Biological Process	amide transport	5.02E-05	8.25E-04	15	277	"ABCA1,PIM3,PPARG,KCNB1,INHBB,HLA-DRB5,APLN,MTNR1B,EDN1,UCP2,TAP1,NR1D1,AQP11,MYRIP,CD74"
GO: Biological Process	regulation of endopeptidase activity	5.23E-05	8.56E-04	16	311	"SERPINA3,PPARG,DAP,TIMP1,BCL2L1,BST2,SERPINE1,XDH,F2R,MYC,ACER2,CYR61,CTGF,IFI16,STAT1,SERPINE2"
GO: Biological Process	negative regulation of cell death	5.81E-05	9.47E-04	28	768	"PIM3,TIMP1,CDKN1A,ADA,BCL2L1,BMP4,SERPINE1,IRF7,IER3,AMIGO2,F2R,TSC22D1,MYC,PSMB8,PSMB9,EDN1,UCP2,MDK,SOCS3,APOE,CXCL12,CYR61,CTGF,FN1,IFIT3,PIM1,EGR1,CD74"
GO: Biological Process	multi-organism cellular process	5.86E-05	9.52E-04	26	687	"B2M,DHX58,DAXX,OAS1,IFITM3,BCL2L1,BST2,HMGA1,ITGB3,CD93,IRF7,ISG20,VIM,HLA-A,VCAM1,MYC,PSMB8,PSMB9,RSAD2,DDX60,TAP1,IFIT1,IFI16,ISG15,OASL,STAT1"
GO: Biological Process	chemotaxis	6.01E-05	9.71E-04	25	648	"ZNF580,HOXB9,UNC5A,ITGB3,ITGA1,BMP4,SERPINE1,CXCL10,VCAM1,EDN1,ANGPT2,PDGFB,PDGFA,CXCL12,COL4A1,COL4A2,CYR61,SEMA7A,TYROBP,FN1,RHOB,FLRT2,PLAU,CDH13,CD74"
GO: Biological Process	taxis	6.16E-05	9.92E-04	25	649	"ZNF580,HOXB9,UNC5A,ITGB3,ITGA1,BMP4,SERPINE1,CXCL10,VCAM1,EDN1,ANGPT2,PDGFB,PDGFA,CXCL12,COL4A1,COL4A2,CYR61,SEMA7A,TYROBP,FN1,RHOB,FLRT2,PLAU,CDH13,CD74"
GO: Biological Process	regulation of MAPK cascade	6.33E-05	1.01E-03	22	533	"DAXX,GADD45G,ITGA1,BMP4,XDH,F2R,BMPER,MYC,EDN1,MAP3K6,C1QTNF1,UCHL1,PDGFB,PDGFA,APOE,IGF2,IGFBP3,NPNT,CYR61,SEMA7A,CTGF,CD74"
GO: Biological Process	negative regulation of leukocyte proliferation	6.34E-05	1.01E-03	7	62	"CD274,BMP4,INPP5D,HLA-DRB5,HLA-DQB1,HLA-DQA1,MNDA"
GO: Biological Process	cell-substrate adhesion	6.51E-05	1.04E-03	14	251	"FBLN2,ACTN1,ITGB3,SERPINE1,ANGPT2,ACER2,NPNT,CYR61,CTGF,TNFRSF12A,FN1,LGALS1,PLAU,CDH13"
GO: Biological Process	regulation of DNA biosynthetic process	6.56E-05	1.04E-03	5	27	"CDKN1A,RGCC,MYC,PDGFB,PDGFA"
GO: Biological Process	negative regulation of endothelial cell proliferation	6.56E-05	1.04E-03	5	27	"XDH,RGCC,NR2F2,APOE,STAT1"
GO: Biological Process	positive regulation of ERK1 and ERK2 cascade	6.65E-05	1.05E-03	9	108	"BMP4,F2R,BMPER,PDGFB,PDGFA,NPNT,SEMA7A,CTGF,CD74"
GO: Biological Process	positive regulation of phosphorylation	6.94E-05	1.09E-03	28	776	"DAXX,HSPA2,CDKN1A,GADD45G,ITGB3,ITGA1,BMP4,XDH,RGCC,IL15,APLN,F2R,BMPER,EDN1,EHD4,MAP3K6,C1QTNF1,PDGFB,PDGFA,IGF2,IGFBP3,CCNY,NPNT,CYR61,SEMA7A,CTGF,PIM1,CD74"
GO: Biological Process	positive regulation of endopeptidase activity	7.20E-05	1.13E-03	10	135	"PPARG,DAP,XDH,F2R,MYC,ACER2,CYR61,CTGF,IFI16,STAT1"
GO: Biological Process	negative regulation of protein phosphorylation	7.71E-05	1.20E-03	14	255	"CDKN1A,GADD45G,BMP4,XDH,FABP4,NR2F2,ERRFI1,GBP6,UCHL1,SOCS3,APOE,IGFBP3,ITPRIP,DDIT4"
GO: Biological Process	cellular response to organic cyclic compound	7.80E-05	1.21E-03	15	288	"ABCA1,PPARG,NR2F6,BMP4,NR1D2,INHBB,IL15,NR2F2,PDGFB,APOE,NR1D1,LGALS1,IFIT1,EGR1,MMP2"
GO: Biological Process	MDA-5 signaling pathway	8.17E-05	1.25E-03	3	6	"DHX58,IRF7,DDX60"
GO: Biological Process	extracellular transport	8.17E-05	1.25E-03	3	6	"SLC1A5,TAP1,IFIT1"
GO: Biological Process	negative regulation of receptor biosynthetic process	8.17E-05	1.25E-03	3	6	"PPARG,ITGB3,NR1D1"
GO: Biological Process	nitrogen compound transport	8.34E-05	1.28E-03	26	702	"ABCA1,PIM3,PPARG,SLC6A6,GJA1,KCNB1,ADA,MX2,SLC1A5,ABCG2,INHBB,SLC3A2,HLA-DRB5,APLN,MTNR1B,MYC,EDN1,LY6E,UCP2,CXCL12,IGF2BP1,TAP1,NR1D1,AQP11,MYRIP,CD74"
GO: Biological Process	negative regulation of protein modification process	8.39E-05	1.28E-03	18	394	"CDKN1A,GADD45G,BMP4,XDH,FABP4,NR2F2,PSMB8,PSMB9,ACER2,ERRFI1,GBP6,UCHL1,SOCS3,APOE,IGFBP3,ITPRIP,ISG15,DDIT4"
GO: Biological Process	protein phosphorylation	8.74E-05	1.33E-03	42	1405	"PIM3,STK17B,DAXX,HSPA2,CDKN1A,SIK1,GADD45G,ITGB3,ITGA1,BMP4,XDH,WEE1,CKS1B,RGCC,CXCL10,FABP4,NEK6,IL15,NR2F2,F2R,BMPER,EDN1,EHD4,MAP3K6,ERRFI1,GBP6,CRIM1,UCHL1,PDGFB,PDGFA,SOCS3,APOE,IGF2,IGFBP3,CCNY,CYR61,SEMA7A,CTGF,ITPRIP,PIM1,CD74,DDIT4"
GO: Biological Process	positive regulation of leukocyte activation	9.10E-05	1.38E-03	14	259	"IL33,CD274,CDKN1A,ADA,INPP5D,HLA-DRB5,IL15,HLA-DQB1,HLA-DQA1,HLA-DMA,VCAM1,IGF2,LGALS1,CD74"
GO: Biological Process	negative regulation of biosynthetic process	9.37E-05	1.41E-03	37	1181	"PPARG,DAP,DAXX,SIK1,HOXD8,IFITM3,HMGA1,ITGB3,ZFP36,NR2F6,BMP4,IRF7,CIRBP,RASD1,INPP5D,NR1D2,INHBB,FABP4,PER3,NR2F2,MYC,EDN1,ACER2,ZNF423,PER1,GBP6,PDGFB,PDGFA,APOE,IGF2BP1,NR1D1,JDP2,IFI16,ZBTB16,EGR1,CRY2,STAT1"
GO: Biological Process	positive regulation of axon extension	9.40E-05	1.41E-03	5	29	"APOE,CXCL12,SEMA7A,TNFRSF12A,FN1"
GO: Biological Process	regulation of leukocyte migration	9.46E-05	1.42E-03	9	113	"IL33,ZNF580,ADA,SELE,SERPINE1,CXCL10,EDN1,CXCL12,CD74"
GO: Biological Process	muscle cell proliferation	9.77E-05	1.46E-03	10	140	"TGM2,PPARG,GJA1,BMP4,IL15,EDN1,PDGFB,IGFBP3,CDH13,STAT1"
GO: Biological Process	aging	9.91E-05	1.47E-03	13	229	"TIMP1,CDKN1A,ADA,HMGA1,SERPINE1,INPP5D,NEK6,IL15,VCAM1,EDN1,UCP2,APOE,CTGF"
GO: Biological Process	regulation of carbohydrate metabolic process	1.04E-04	1.54E-03	10	141	"SIK1,IER3,MYC,ACER2,C1QTNF1,PDGFB,IGF2,IGFBP3,NR1D1,DDIT4"
GO: Biological Process	negative regulation of lipid storage	1.06E-04	1.57E-03	4	16	"ABCA1,PPARG,ITGB3,PNPLA2"
GO: Biological Process	response to inorganic substance	1.08E-04	1.59E-03	18	402	"B2M,PPARG,ZNF580,COL18A1,ADA,JUNB,OLR1,XDH,MT1H,FABP4,VCAM1,UCP2,PDGFA,CD14,FN1,RHOB,STAT1,MMP2"
GO: Biological Process	regulation of adaptive immune response based on somatic recombination of immune receptors built from immunoglobulin superfamily domains	1.08E-04	1.59E-03	9	115	"IL33,B2M,ADA,HLA-E,HLA-DQB1,HLA-A,HLA-DMA,RSAD2,TAP1"
GO: Biological Process	peptide transport	1.16E-04	1.69E-03	14	265	"ABCA1,PIM3,PPARG,KCNB1,INHBB,HLA-DRB5,APLN,MTNR1B,EDN1,UCP2,TAP1,NR1D1,MYRIP,CD74"
GO: Biological Process	regulation of systemic arterial blood pressure	1.16E-04	1.69E-03	8	91	"ACE,GJA1,IER3,PRCP,F2R,EDN1,PDGFB,DDAH1"
GO: Biological Process	tube development	1.16E-04	1.69E-03	21	517	"TGM2,ACE,GPC3,GJA1,ADA,IRX3,ITGB3,BMP4,SHROOM3,BMPER,ALDH1A2,MYC,EDN1,ERRFI1,PDGFA,CXCL12,NPNT,CTGF,MGP,AQP11,STAT1"
GO: Biological Process	viral process	1.17E-04	1.69E-03	25	676	"B2M,DHX58,DAXX,OAS1,IFITM3,BCL2L1,BST2,HMGA1,ITGB3,CD93,IRF7,ISG20,VIM,HLA-A,VCAM1,MYC,PSMB8,PSMB9,RSAD2,TAP1,IFIT1,IFI16,ISG15,OASL,STAT1"
GO: Biological Process	positive regulation of fibroblast proliferation	1.20E-04	1.73E-03	6	48	"CDKN1A,MYC,S100A6,PDGFB,PDGFA,CD74"
GO: Biological Process	regulation of circadian rhythm	1.20E-04	1.73E-03	6	48	"ADA,NR2F6,NR1D2,PER1,NR1D1,CRY2"
GO: Biological Process	regulation of homeostatic process	1.21E-04	1.73E-03	16	334	"PIM3,GJA1,ADA,ITGB3,INPP5D,CXCL10,NR1D2,HLA-DRB5,APLN,F2R,MYC,EDN1,UCP2,NR1D1,ISG15,CD74"
GO: Biological Process	anatomical structure formation involved in morphogenesis	1.22E-04	1.74E-03	32	974	"TGM2,ACE,GPR56,COL18A1,ADA,IRX3,JUNB,ITGB3,BMP4,SERPINE1,SHROOM3,RGCC,CXCL10,PRCP,BMPER,EDN1,ANGPT2,PDGFA,CXCL12,COL4A1,COL4A2,CYR61,DDAH1,CTGF,TNFRSF12A,FN1,RHOB,ESM1,PLAU,CDH13,STAT1,MMP2"
GO: Biological Process	regulation of cytokine-mediated signaling pathway	1.25E-04	1.78E-03	8	92	"PPARG,USP18,IRF7,NLRC5,EDN1,SOCS3,STAT1,CD74"
GO: Biological Process	negative regulation of macromolecule biosynthetic process	1.32E-04	1.86E-03	35	1111	"PPARG,DAP,DAXX,SIK1,HOXD8,IFITM3,HMGA1,ITGB3,ZFP36,NR2F6,BMP4,IRF7,CIRBP,RASD1,INPP5D,NR1D2,INHBB,FABP4,PER3,NR2F2,MYC,EDN1,ACER2,ZNF423,PER1,GBP6,PDGFB,IGF2BP1,NR1D1,JDP2,IFI16,ZBTB16,EGR1,CRY2,STAT1"
GO: Biological Process	positive regulation of cysteine-type endopeptidase activity involved in apoptotic process	1.32E-04	1.86E-03	9	118	"PPARG,DAP,XDH,F2R,MYC,ACER2,CYR61,CTGF,STAT1"
GO: Biological Process	regulation of blood pressure	1.32E-04	1.86E-03	11	174	"ACE,PPARG,GJA1,ACTA2,IER3,PRCP,APLN,F2R,EDN1,PDGFB,DDAH1"
GO: Biological Process	regulation of cyclin-dependent protein serine/threonine kinase activity	1.35E-04	1.90E-03	8	93	"HSPA2,CDKN1A,CKS1B,RGCC,NR2F2,PDGFB,CCNY,PIM1"
GO: Biological Process	cellular response to virus	1.37E-04	1.92E-03	4	17	"DHX58,BCL2L1,IRF7,DDX60"
GO: Biological Process	response to low-density lipoprotein particle	1.41E-04	1.96E-03	3	7	"ABCA1,PPARG,CDH13"
GO: Biological Process	ISG15-protein conjugation	1.41E-04	1.96E-03	3	7	"UBE2L6,USP18,ISG15"
GO: Biological Process	negative regulation of phosphorylation	1.42E-04	1.97E-03	15	304	"CDKN1A,GADD45G,BMP4,XDH,FABP4,NR2F2,MYC,ERRFI1,GBP6,UCHL1,SOCS3,APOE,IGFBP3,ITPRIP,DDIT4"
GO: Biological Process	positive regulation of lymphocyte activation	1.46E-04	2.01E-03	13	238	"CD274,CDKN1A,ADA,INPP5D,HLA-DRB5,IL15,HLA-DQB1,HLA-DQA1,HLA-DMA,VCAM1,IGF2,LGALS1,CD74"
GO: Biological Process	metanephros development	1.46E-04	2.01E-03	8	94	"GPC3,IRX3,BMP4,MYC,PDGFB,PDGFA,EGR1,STAT1"
GO: Biological Process	positive regulation of cytokine production	1.58E-04	2.17E-03	14	273	"IL33,ZNF580,DHX58,SULF2,SERPINE1,IRF7,P2RY2,IL15,RSAD2,DDX60,SEMA7A,CD14,IFI16,CD74"
GO: Biological Process	regulation of viral process	1.60E-04	2.18E-03	9	121	"OAS1,IFITM3,BST2,ISG20,RSAD2,IFIT1,IFI16,ISG15,OASL"
GO: Biological Process	multicellular organismal macromolecule metabolic process	1.70E-04	2.31E-03	9	122	"ACE,COL18A1,BMP4,RGCC,F2R,COL4A1,COL4A2,CTGF,MMP2"
GO: Biological Process	regulation of secretion	1.71E-04	2.31E-03	22	571	"IL33,PIM3,PPARG,CD274,KCNB1,ADA,P2RY2,RGCC,INHBB,HLA-DRB5,APLN,F2R,MTNR1B,EDN1,RSAD2,UCP2,CXCL12,NR1D1,CD14,NMB,MYRIP,CD74"
GO: Biological Process	regulation of ERK1 and ERK2 cascade	1.73E-04	2.34E-03	10	150	"BMP4,F2R,BMPER,PDGFB,PDGFA,NPNT,CYR61,SEMA7A,CTGF,CD74"
GO: Biological Process	leukocyte mediated immunity	1.77E-04	2.39E-03	14	276	"ACE,B2M,DBH,BST2,IRF7,INPP5D,HLA-E,HLA-DRB5,HLA-DQB1,HLA-A,HLA-DMA,RSAD2,TAP1,CD74"
GO: Biological Process	regulation of lipid biosynthetic process	1.81E-04	2.43E-03	9	123	"THRSP,SIK1,PDGFB,PDGFA,APOE,FITM2,IGF2,CYR61,NR1D1"
GO: Biological Process	peptide secretion	1.86E-04	2.50E-03	13	244	"ABCA1,PIM3,PPARG,KCNB1,INHBB,HLA-DRB5,APLN,MTNR1B,EDN1,UCP2,NR1D1,MYRIP,CD74"
GO: Biological Process	regulation of cell cycle	1.89E-04	2.52E-03	27	781	"PIM3,HSPA2,CDKN1A,SIK1,GADD45G,BCL2L1,JUNB,BMP4,WEE1,MX2,AK1,CKS1B,IER3,RGCC,NEK6,NR2F2,MYC,PSMB8,PSMB9,EDN1,GAS7,PDGFB,IGF2,CCNY,CTGF,RHOB,PIM1"
GO: Biological Process	positive regulation of cell cycle	1.93E-04	2.56E-03	9	124	"HSPA2,RGCC,MYC,EDN1,PDGFB,IGF2,CCNY,CTGF,PIM1"
GO: Biological Process	activation of cysteine-type endopeptidase activity	1.95E-04	2.59E-03	8	98	"PPARG,DAP,XDH,F2R,MYC,ACER2,IFI16,STAT1"
GO: Biological Process	vasodilation	1.97E-04	2.59E-03	7	74	"ACE,GJA1,ITGA1,P2RY2,APLN,PDGFB,APOE"
GO: Biological Process	regulation of fibroblast proliferation	1.97E-04	2.59E-03	7	74	"IFI30,CDKN1A,MYC,S100A6,PDGFB,PDGFA,CD74"
GO: Biological Process	negative regulation of signal transduction	2.02E-04	2.66E-03	29	870	"PPARG,GPC3,DHX58,PMEPA1,ADA,BCL2L1,SULF2,ITGA1,BMP4,SERPINE1,XDH,INPP5D,NLRC5,BMPER,MYC,ERRFI1,UCHL1,SOCS3,APOE,CXCL12,IGFBP3,NR1D1,CYP26B1,ITPRIP,EGR1,STAT1,CD74,SERPINE2,DDIT4"
GO: Biological Process	glucose homeostasis	2.06E-04	2.69E-03	11	183	"PIM3,PPARG,DBH,PRCP,HLA-DRB5,MTNR1B,VCAM1,UCP2,NR1D1,LGALS1,NMB"
GO: Biological Process	carbohydrate homeostasis	2.06E-04	2.69E-03	11	183	"PIM3,PPARG,DBH,PRCP,HLA-DRB5,MTNR1B,VCAM1,UCP2,NR1D1,LGALS1,NMB"
GO: Biological Process	negative regulation of immune response	2.14E-04	2.78E-03	7	75	"IL33,DHX58,TRAFD1,INPP5D,HLA-A,TAP1,IFI16"
GO: Biological Process	"antigen processing and presentation of exogenous peptide antigen via MHC class I, TAP-dependent"	2.14E-04	2.78E-03	7	75	"B2M,CYBB,HLA-E,HLA-A,PSMB8,PSMB9,TAP1"
GO: Biological Process	response to mechanical stimulus	2.16E-04	2.79E-03	11	184	"GJA1,JUNB,CXCL10,INHBB,MYC,ANGPT2,CXCL12,EGR1,STAT1,MMP2,SERPINE2"
GO: Biological Process	glomerular filtration	2.18E-04	2.79E-03	4	19	"GJA1,SULF2,F2R,PDGFB"
GO: Biological Process	renal filtration	2.18E-04	2.79E-03	4	19	"GJA1,SULF2,F2R,PDGFB"
GO: Biological Process	regulation of receptor biosynthetic process	2.18E-04	2.79E-03	4	19	"PPARG,ITGB3,EDN1,NR1D1"
GO: Biological Process	antigen processing and presentation of endogenous peptide antigen	2.23E-04	2.86E-03	3	8	"HLA-E,HLA-A,TAP1"
GO: Biological Process	cell-type specific apoptotic process	2.28E-04	2.91E-03	18	427	"STK17B,COL18A1,ADA,BCL2L1,ITGA1,BMP4,SERPINE1,IRF7,RGCC,F2R,MYC,EDN1,MDK,APOE,CXCL12,RHOB,EGR1,CD74"
GO: Biological Process	regulation of kidney development	2.33E-04	2.97E-03	6	54	"BMP4,MYC,PDGFB,PDGFA,EGR1,STAT1"
GO: Biological Process	positive regulation of muscle contraction	2.37E-04	3.00E-03	5	35	"ADA,F2R,EDN1,NPNT,CTGF"
GO: Biological Process	positive regulation of T cell activation	2.37E-04	3.00E-03	11	186	"CD274,ADA,HLA-DRB5,IL15,HLA-DQB1,HLA-DQA1,HLA-DMA,VCAM1,IGF2,LGALS1,CD74"
GO: Biological Process	regulation of cell-substrate adhesion	2.45E-04	3.08E-03	9	128	"FBLN2,SERPINE1,ANGPT2,ACER2,NPNT,CYR61,LGALS1,PLAU,CDH13"
GO: Biological Process	fibroblast proliferation	2.52E-04	3.17E-03	7	77	"IFI30,CDKN1A,MYC,S100A6,PDGFB,PDGFA,CD74"
GO: Biological Process	negative regulation of phosphatidylinositol biosynthetic process	2.63E-04	3.25E-03	2	2	"PDGFB,PDGFA"
GO: Biological Process	cellular response to amino acid starvation	2.63E-04	3.25E-03	2	2	"DAP,UCP2"
GO: Biological Process	response to mycophenolic acid	2.63E-04	3.25E-03	2	2	"PDGFB,EGR1"
GO: Biological Process	cellular response to mycophenolic acid	2.63E-04	3.25E-03	2	2	"PDGFB,EGR1"
GO: Biological Process	xanthine metabolic process	2.63E-04	3.25E-03	2	2	"ADA,XDH"
GO: Biological Process	negative regulation of epithelial cell migration	2.72E-04	3.36E-03	5	36	"RGCC,NR2F2,ANGPT2,APOE,CD63"
GO: Biological Process	negative regulation of cytokine production	2.77E-04	3.41E-03	10	159	"IL33,UBE2L6,PPARG,DHX58,BST2,NLRC5,RGCC,HLA-DRB5,GBP6,ISG15"
GO: Biological Process	lipid storage	2.86E-04	3.50E-03	6	56	"ABCA1,PPARG,PLIN2,ITGB3,FITM2,PNPLA2"
GO: Biological Process	regulation of lipid metabolic process	2.97E-04	3.64E-03	13	256	"SERPINA3,THRSP,PPARG,SIK1,NR1D2,PDGFB,PDGFA,APOE,FITM2,PNPLA2,IGF2,CYR61,NR1D1"
GO: Biological Process	negative regulation of molecular function	3.00E-04	3.66E-03	29	891	"SERPINA3,PPARG,DAP,GPC3,TIMP1,CDKN1A,SIK1,GADD45G,BCL2L1,BST2,BMP4,SERPINE1,NLRC5,FABP4,NR2F2,MYC,PSMB8,PSMB9,ERRFI1,UCHL1,SOCS3,APOE,ITPRIP,IFIT2,IFIT1,IFI16,PIM1,CRY2,SERPINE2"
GO: Biological Process	response to radiation	3.01E-04	3.67E-03	18	437	"GPC3,DBH,CDKN1A,BCL2L1,JUNB,NR2F6,CIRBP,CXCL10,VCAM1,MYC,ANGPT2,PER1,APOE,CXCL12,RHOB,IFI16,EGR1,CRY2"
GO: Biological Process	negative regulation of cellular biosynthetic process	3.09E-04	3.74E-03	35	1162	"PPARG,DAP,DAXX,SIK1,HOXD8,IFITM3,HMGA1,ZFP36,NR2F6,BMP4,IRF7,CIRBP,RASD1,INPP5D,NR1D2,INHBB,FABP4,PER3,NR2F2,MYC,EDN1,ACER2,ZNF423,PER1,GBP6,PDGFB,PDGFA,IGF2BP1,NR1D1,JDP2,IFI16,ZBTB16,EGR1,CRY2,STAT1"
GO: Biological Process	response to extracellular stimulus	3.09E-04	3.74E-03	16	363	"ABCA1,PPARG,DAP,CDKN1A,ADA,CYBB,ZFP36,CXCL10,INHBB,IL15,ALDH1A2,VCAM1,UCP2,IFI16,EGR1,STAT1"
GO: Biological Process	regulation of lipid storage	3.10E-04	3.74E-03	5	37	"ABCA1,PPARG,ITGB3,FITM2,PNPLA2"
GO: Biological Process	steroid hormone mediated signaling pathway	3.15E-04	3.79E-03	6	57	"PPARG,NR2F6,BMP4,NR1D2,NR2F2,NR1D1"
GO: Biological Process	regulation of defense response to virus	3.19E-04	3.83E-03	7	80	"B2M,DHX58,IL15,HLA-A,DDX60,GBP6,IFIT1"
GO: Biological Process	positive regulation of protein serine/threonine kinase activity	3.20E-04	3.83E-03	13	258	"DAXX,HSPA2,GADD45G,ITGA1,RGCC,EDN1,MAP3K6,PDGFB,PDGFA,IGF2,CCNY,PIM1,CD74"
GO: Biological Process	cellular response to interferon-alpha	3.31E-04	3.94E-03	3	9	"OAS1,IFIT3,IFIT2"
GO: Biological Process	lymphocyte differentiation	3.50E-04	4.16E-03	14	295	"B2M,GADD45G,ADA,BMP4,INPP5D,IL15,HLA-DQB1,HLA-DQA1,HLA-DMA,VCAM1,RSAD2,LGALS1,EGR1,CD74"
GO: Biological Process	cellular response to endogenous stimulus	3.52E-04	4.17E-03	30	944	"PPARG,PMEPA1,CDKN1A,BCL2L1,JUNB,KLF9,SULF2,NR2F6,BMP4,SERPINE1,NR1D2,INHBB,PRCP,NR2F2,MYC,UCP2,PDGFB,PDGFA,SOCS3,COL4A1,IGF2,COL4A2,NPNT,NR1D1,CTGF,CTSS,CDH13,EGR1,STAT1,MMP2"
GO: Biological Process	regulation of type I interferon-mediated signaling pathway	3.53E-04	4.17E-03	5	38	"USP18,IRF7,NLRC5,SOCS3,STAT1"
GO: Biological Process	morphogenesis of an epithelium	3.55E-04	4.18E-03	18	443	"TGM2,GPC3,GJA1,IRX3,BMP4,SHROOM3,ALDH1A2,MYC,EDN1,PDGFB,PDGFA,SOCS3,CXCL12,NPNT,CYR61,MGP,STAT1,MMP2"
GO: Biological Process	response to nitrogen compound	3.56E-04	4.19E-03	27	813	"SERPINA3,PPARG,TIMP1,GJA1,DBH,CDKN1A,ADA,BCL2L1,JUNB,INHBB,SLC3A2,VCAM1,MYC,GPIHBP1,EDN1,UCP2,PDGFB,SOCS3,APOE,CXCL12,COL4A1,IGF2,CTGF,IFIT1,EGR1,STAT1,MMP2"
GO: Biological Process	response to steroid hormone	3.60E-04	4.22E-03	16	368	"PPARG,CDKN1A,JUNB,NR2F6,BMP4,NR1D2,NR2F2,ALDH1A2,EDN1,MDK,PDGFB,PDGFA,NR1D1,CTGF,EGR1,MMP2"
GO: Biological Process	regulation of growth	3.63E-04	4.24E-03	22	603	"PPARG,GPC3,GJA1,CDKN1A,BST2,BMP4,MT1H,CRIM1,SOCS3,APOE,CXCL12,FAM107A,IGFBP3,CYR61,SEMA7A,CTGF,TNFRSF12A,FN1,IFI16,ESM1,CDH13,SERPINE2"
GO: Biological Process	negative regulation of lymphocyte activation	3.79E-04	4.42E-03	8	108	"CD274,BMP4,INPP5D,HLA-DRB5,HLA-DQB1,HLA-DQA1,MNDA,CD74"
GO: Biological Process	positive regulation of smooth muscle cell proliferation	3.81E-04	4.43E-03	6	59	"TGM2,BMP4,EDN1,PDGFB,CDH13,STAT1"
GO: Biological Process	regulation of cellular carbohydrate metabolic process	3.84E-04	4.45E-03	9	136	"SIK1,IER3,MYC,ACER2,C1QTNF1,IGF2,IGFBP3,NR1D1,DDIT4"
GO: Biological Process	lymphocyte activation	3.86E-04	4.47E-03	21	565	"B2M,CD274,CDKN1A,GADD45G,ADA,BST2,BMP4,INPP5D,HLA-DRB5,IL15,HLA-DQB1,HLA-DQA1,HLA-DMA,VCAM1,RSAD2,CXCL12,IGF2,LGALS1,MNDA,EGR1,CD74"
GO: Biological Process	ERK1 and ERK2 cascade	3.91E-04	4.51E-03	10	166	"BMP4,F2R,BMPER,PDGFB,PDGFA,NPNT,CYR61,SEMA7A,CTGF,CD74"
GO: Biological Process	positive regulation of cytokine-mediated signaling pathway	3.95E-04	4.54E-03	4	22	"IRF7,NLRC5,EDN1,CD74"
GO: Biological Process	multicellular organismal homeostasis	3.96E-04	4.54E-03	12	230	"SERPINA3,DBH,ITGB3,XDH,INPP5D,NR1D2,PRCP,APLN,F2R,NR1D1,CTGF,CTSS"
GO: Biological Process	interaction with symbiont	3.99E-04	4.55E-03	5	39	"GBP2,GBP3,GBP4,GBP6,GBP7"
GO: Biological Process	negative regulation of type I interferon production	3.99E-04	4.55E-03	5	39	"UBE2L6,DHX58,NLRC5,GBP6,ISG15"
GO: Biological Process	response to nutrient levels	4.02E-04	4.58E-03	15	335	"ABCA1,PPARG,DAP,ADA,CYBB,ZFP36,CXCL10,INHBB,IL15,ALDH1A2,VCAM1,UCP2,IFI16,EGR1,STAT1"
GO: Biological Process	intrinsic apoptotic signaling pathway in response to DNA damage	4.04E-04	4.58E-03	8	109	"CDKN1A,BCL2L1,IER3,MYC,CXCL12,IFI16,CD74,DDIT4"
GO: Biological Process	multicellular organismal metabolic process	4.05E-04	4.58E-03	9	137	"ACE,COL18A1,BMP4,RGCC,F2R,COL4A1,COL4A2,CTGF,MMP2"
GO: Biological Process	T cell activation	4.10E-04	4.62E-03	17	410	"B2M,CD274,GADD45G,ADA,BMP4,HLA-DRB5,IL15,HLA-DQB1,HLA-DQA1,HLA-DMA,VCAM1,RSAD2,CXCL12,IGF2,LGALS1,EGR1,CD74"
GO: Biological Process	MAPK cascade	4.15E-04	4.67E-03	22	609	"DAXX,GADD45G,ITGA1,BMP4,XDH,F2R,BMPER,MYC,EDN1,MAP3K6,C1QTNF1,UCHL1,PDGFB,PDGFA,APOE,IGF2,IGFBP3,NPNT,CYR61,SEMA7A,CTGF,CD74"
GO: Biological Process	growth	4.39E-04	4.93E-03	29	912	"PPARG,GPC3,GJA1,CDKN1A,BCL2L1,BST2,BMP4,MT1H,INHBB,SLC3A2,EDN1,CRIM1,LY6E,PDGFB,SOCS3,APOE,CXCL12,FAM107A,IGFBP3,CYR61,SEMA7A,CTGF,TNFRSF12A,FN1,IFI16,ESM1,PLAU,CDH13,SERPINE2"
GO: Biological Process	regulation of peptide secretion	4.41E-04	4.94E-03	11	200	"PIM3,PPARG,KCNB1,INHBB,HLA-DRB5,APLN,MTNR1B,UCP2,NR1D1,MYRIP,CD74"
GO: Biological Process	positive regulation of T cell mediated immunity	4.50E-04	5.03E-03	5	40	"B2M,HLA-E,HLA-A,RSAD2,TAP1"
GO: Biological Process	regulation of glucose metabolic process	4.56E-04	5.07E-03	8	111	"SIK1,IER3,MYC,C1QTNF1,IGF2,IGFBP3,NR1D1,DDIT4"
GO: Biological Process	positive regulation of leukocyte chemotaxis	4.56E-04	5.07E-03	6	61	"ZNF580,SERPINE1,CXCL10,EDN1,CXCL12,CD74"
GO: Biological Process	transmembrane receptor protein serine/threonine kinase signaling pathway	4.57E-04	5.07E-03	14	303	"GPC3,PMEPA1,JUNB,BMP4,SERPINE1,INHBB,BMPER,MYC,ZNF423,PDGFB,PDGFA,NPNT,CYR61,EGR1"
GO: Biological Process	multi-multicellular organism process	4.62E-04	5.10E-03	12	234	"TIMP1,DBH,JUNB,KLF9,ABCG2,NR2F2,EDN1,ANGPT2,UCP2,MAFF,MMP2,SERPINE2"
GO: Biological Process	regulation of lymphocyte activation	4.70E-04	5.18E-03	15	340	"CD274,CDKN1A,ADA,BMP4,INPP5D,HLA-DRB5,IL15,HLA-DQB1,HLA-DQA1,HLA-DMA,VCAM1,IGF2,LGALS1,MNDA,CD74"
GO: Biological Process	positive regulation of response to cytokine stimulus	4.72E-04	5.19E-03	4	23	"IRF7,NLRC5,EDN1,CD74"
GO: Biological Process	negative regulation of signaling	4.79E-04	5.25E-03	29	917	"PPARG,GPC3,DHX58,PMEPA1,ADA,BCL2L1,SULF2,ITGA1,BMP4,SERPINE1,XDH,INPP5D,NLRC5,BMPER,MYC,ERRFI1,UCHL1,SOCS3,APOE,CXCL12,IGFBP3,NR1D1,CYP26B1,ITPRIP,EGR1,STAT1,CD74,SERPINE2,DDIT4"
GO: Biological Process	regulation of peptide transport	4.80E-04	5.25E-03	11	202	"PIM3,PPARG,KCNB1,INHBB,HLA-DRB5,APLN,MTNR1B,UCP2,NR1D1,MYRIP,CD74"
GO: Biological Process	positive regulation of leukocyte migration	4.97E-04	5.43E-03	7	86	"ZNF580,SELE,SERPINE1,CXCL10,EDN1,CXCL12,CD74"
GO: Biological Process	negative regulation of cell communication	5.05E-04	5.49E-03	29	920	"PPARG,GPC3,DHX58,PMEPA1,ADA,BCL2L1,SULF2,ITGA1,BMP4,SERPINE1,XDH,INPP5D,NLRC5,BMPER,MYC,ERRFI1,UCHL1,SOCS3,APOE,CXCL12,IGFBP3,NR1D1,CYP26B1,ITPRIP,EGR1,STAT1,CD74,SERPINE2,DDIT4"
GO: Biological Process	cellular response to steroid hormone stimulus	5.14E-04	5.58E-03	8	113	"PPARG,NR2F6,BMP4,NR1D2,NR2F2,NR1D1,EGR1,MMP2"
GO: Biological Process	positive regulation of inflammatory response	5.34E-04	5.77E-03	7	87	"TGM2,IL33,ACE,SERPINE1,FABP4,IL15,CTSS"
GO: Biological Process	regulation of hormone secretion	5.37E-04	5.80E-03	12	238	"PIM3,PPARG,KCNB1,INHBB,HLA-DRB5,APLN,MTNR1B,EDN1,UCP2,NR1D1,NMB,MYRIP"
GO: Biological Process	positive regulation of cell development	5.43E-04	5.84E-03	11	205	"ACE,PPARG,BMP4,RGCC,VIM,APOE,CXCL12,SEMA7A,TNFRSF12A,FN1,SERPINE2"
GO: Biological Process	neurogenesis	5.43E-04	5.84E-03	39	1387	"ACE,PPARG,GJA1,RTN4RL2,GPR56,EFHD1,UNC5A,IRX3,ITGB3,ROM1,NR2F6,ITGA1,BMP4,P2RY2,WEE1,VIM,NR2F2,GPRC5B,ALDH1A2,GAS7,S100A6,UCHL1,APOE,CXCL12,COL4A1,COL4A2,SEMA7A,TYROBP,TACC2,TNFRSF12A,FN1,LGALS1,RHOB,FLRT2,EGR1,LHX6,MMP2,SERPINE2,DDIT4"
GO: Biological Process	response to organonitrogen compound	5.59E-04	5.96E-03	25	750	"SERPINA3,PPARG,TIMP1,GJA1,DBH,CDKN1A,ADA,BCL2L1,JUNB,INHBB,VCAM1,MYC,GPIHBP1,EDN1,UCP2,PDGFB,SOCS3,APOE,CXCL12,COL4A1,IGF2,CTGF,EGR1,STAT1,MMP2"
GO: Biological Process	receptor biosynthetic process	5.59E-04	5.96E-03	4	24	"PPARG,ITGB3,EDN1,NR1D1"
GO: Biological Process	regulation of interferon-gamma-mediated signaling pathway	5.59E-04	5.96E-03	4	24	"PPARG,NLRC5,SOCS3,STAT1"
GO: Biological Process	negative regulation of gene expression	5.71E-04	6.07E-03	32	1063	"PPARG,DAP,GJA1,DAXX,CDKN1A,SIK1,HOXD8,HMGA1,ZFP36,NR2F6,BMP4,XDH,IRF7,RASD1,NR1D2,FABP4,PER3,NR2F2,MYC,EDN1,ZNF423,PER1,GBP6,PDGFB,NR1D1,CTGF,JDP2,IFI16,ZBTB16,EGR1,CRY2,STAT1"
GO: Biological Process	positive regulation of gene expression	5.75E-04	6.10E-03	36	1249	"IL33,PPARG,ZNF580,GJA1,DBP,HOXB9,JUNB,KLF9,HMGA1,BMP4,SERPINE1,IRF7,NLRC5,RGCC,CXCL10,NR1D2,TEF,NR2F2,F2R,ALDH1A2,MYC,ZNF423,MDK,PDGFB,IGF2,MKL2,NPNT,CYR61,NR1D1,CYP26B1,CTGF,IFI16,ZBTB16,CDH13,EGR1,STAT1"
GO: Biological Process	activation of immune response	5.83E-04	6.17E-03	17	423	"DHX58,CFB,ADA,IRF7,TRIL,INPP5D,RGCC,HLA-DRB5,HLA-DQB1,HLA-DQA1,RSAD2,DDX60,NR1D1,CD14,CTSS,IFI16,MNDA"
GO: Biological Process	positive regulation of molecular function	5.99E-04	6.33E-03	37	1299	"PPARG,DAP,CHN2,DAXX,HSPA2,CDKN1A,GADD45G,ITGB3,ITGA1,BMP4,SELE,XDH,RGCC,F2R,MYC,GPIHBP1,PSMB8,PSMB9,EDN1,ACER2,MAP3K6,ERRFI1,PDGFB,PDGFA,APOE,IGF2,IGFBP3,CCNY,NPNT,CYR61,CTGF,FN1,IFI16,MMP17,PIM1,STAT1,CD74"
GO: Biological Process	response to glucose	6.12E-04	6.43E-03	9	145	"PIM3,HLA-DRB5,VCAM1,ANGPT2,UCP2,NR1D1,CTGF,LGALS1,EGR1"
GO: Biological Process	collagen metabolic process	6.12E-04	6.43E-03	8	116	"COL18A1,BMP4,RGCC,F2R,COL4A1,COL4A2,CTGF,MMP2"
GO: Biological Process	negative regulation of peptide secretion	6.33E-04	6.56E-03	5	43	"PIM3,PPARG,INHBB,UCP2,CD74"
GO: Biological Process	cell adhesion mediated by integrin	6.33E-04	6.56E-03	5	43	"ADA,SERPINE1,ACER2,NPNT,PLAU"
GO: Biological Process	regulation of monocyte differentiation	6.34E-04	6.56E-03	3	11	"IRF7,INPP5D,MYC"
GO: Biological Process	response to lipoprotein particle	6.34E-04	6.56E-03	3	11	"ABCA1,PPARG,CDH13"
GO: Biological Process	regulation of sequestering of triglyceride	6.34E-04	6.56E-03	3	11	"PPARG,FITM2,PNPLA2"
GO: Biological Process	regulation of glomerular filtration	6.34E-04	6.56E-03	3	11	"GJA1,F2R,PDGFB"
GO: Biological Process	positive regulation of endothelial cell proliferation	6.43E-04	6.62E-03	6	65	"ZNF580,ITGB3,BMP4,PDGFB,CXCL12,CDH13"
GO: Biological Process	"regulation of symbiosis, encompassing mutualism through parasitism"	6.43E-04	6.62E-03	9	146	"OAS1,IFITM3,BST2,ISG20,RSAD2,IFIT1,IFI16,ISG15,OASL"
GO: Biological Process	regulation of leukocyte activation	6.57E-04	6.74E-03	16	389	"IL33,CD274,CDKN1A,ADA,BMP4,INPP5D,HLA-DRB5,IL15,HLA-DQB1,HLA-DQA1,HLA-DMA,VCAM1,IGF2,LGALS1,MNDA,CD74"
GO: Biological Process	positive regulation of collagen biosynthetic process	6.58E-04	6.74E-03	4	25	"BMP4,RGCC,F2R,CTGF"
GO: Biological Process	positive regulation of protein kinase activity	6.59E-04	6.74E-03	18	467	"DAXX,HSPA2,CDKN1A,GADD45G,ITGB3,ITGA1,BMP4,RGCC,F2R,EDN1,MAP3K6,PDGFB,PDGFA,IGF2,CCNY,CYR61,PIM1,CD74"
GO: Biological Process	signal transduction by phosphorylation	6.80E-04	6.94E-03	22	632	"DAXX,GADD45G,ITGA1,BMP4,XDH,F2R,BMPER,MYC,EDN1,MAP3K6,C1QTNF1,UCHL1,PDGFB,PDGFA,APOE,IGF2,IGFBP3,NPNT,CYR61,SEMA7A,CTGF,CD74"
GO: Biological Process	muscle structure development	6.96E-04	7.08E-03	20	550	"GJA1,SIK1,BMP4,CXCL10,NR1D2,NR2F2,MYC,EDN1,LY6E,UCHL1,PDGFB,IGF2,IGFBP3,MKL2,NPNT,CYP26B1,LGALS1,ELN,MAFF,EGR1"
GO: Biological Process	regulation of blood vessel endothelial cell migration	7.05E-04	7.15E-03	5	44	"RGCC,PRCP,ANGPT2,PDGFB,APOE"
GO: Biological Process	cellular response to stress	7.25E-04	7.34E-03	39	1408	"DAP,PARP9,ZNF580,SERINC3,DAXX,RTN4RL2,CDKN1A,GADD45G,BCL2L1,HMGA1,XDH,IRF7,IER3,RGCC,CXCL10,INHBB,CLCA1,NEK6,MYC,PSMB8,PSMB9,EDN1,MAP3K6,ERRFI1,UCP2,APOE,CXCL12,IGF2BP1,CTGF,ZSWIM7,RHOB,IFI16,MNDA,EGR1,CRY2,DTX3L,MMP2,CD74,DDIT4"
GO: Biological Process	generation of neurons	7.31E-04	7.38E-03	37	1313	"ACE,PPARG,GJA1,RTN4RL2,GPR56,EFHD1,UNC5A,IRX3,ITGB3,ROM1,NR2F6,ITGA1,BMP4,P2RY2,WEE1,VIM,NR2F2,GPRC5B,ALDH1A2,GAS7,S100A6,UCHL1,APOE,CXCL12,COL4A1,COL4A2,SEMA7A,TYROBP,TNFRSF12A,FN1,LGALS1,RHOB,FLRT2,LHX6,MMP2,SERPINE2,DDIT4"
GO: Biological Process	regulation of cysteine-type endopeptidase activity	7.46E-04	7.49E-03	11	213	"PPARG,DAP,BCL2L1,XDH,F2R,MYC,ACER2,CYR61,CTGF,IFI16,STAT1"
GO: Biological Process	actin filament bundle assembly	7.47E-04	7.49E-03	7	92	"ACTN1,SYNPO,RGCC,GAS7,SHROOM2,CTGF,ELN"
GO: Biological Process	actin filament bundle organization	7.47E-04	7.49E-03	7	92	"ACTN1,SYNPO,RGCC,GAS7,SHROOM2,CTGF,ELN"
GO: Biological Process	negative regulation of hormone secretion	7.56E-04	7.53E-03	6	67	"PIM3,PPARG,INHBB,EDN1,UCP2,NMB"
GO: Biological Process	cellular response to lipopolysaccharide	7.66E-04	7.53E-03	8	120	"CMPK2,ABCA1,SERPINE1,GBP2,GBP6,NR1D1,CD14,STAT1"
GO: Biological Process	regulation of platelet activation	7.67E-04	7.53E-03	4	26	"PDGFB,PDGFA,APOE,SERPINE2"
GO: Biological Process	positive regulation of smooth muscle contraction	7.67E-04	7.53E-03	4	26	"ADA,F2R,EDN1,NPNT"
GO: Biological Process	positive regulation of collagen metabolic process	7.67E-04	7.53E-03	4	26	"BMP4,RGCC,F2R,CTGF"
GO: Biological Process	regulation of triglyceride metabolic process	7.67E-04	7.53E-03	4	26	"THRSP,SIK1,FITM2,PNPLA2"
GO: Biological Process	myeloid leukocyte differentiation	7.69E-04	7.53E-03	10	181	"PPARG,GPC3,JUNB,ITGB3,BMP4,IRF7,INPP5D,MYC,TYROBP,IFI16"
GO: Biological Process	morphogenesis of a branching epithelium	7.75E-04	7.53E-03	11	214	"TGM2,GPC3,BMP4,MYC,EDN1,PDGFB,PDGFA,SOCS3,CXCL12,NPNT,MGP"
GO: Biological Process	negative regulation of transferase activity	7.75E-04	7.53E-03	11	214	"PPARG,CDKN1A,GADD45G,BMP4,FABP4,NR2F2,ERRFI1,UCHL1,SOCS3,APOE,ITPRIP"
GO: Biological Process	protection from natural killer cell mediated cytotoxicity	7.79E-04	7.53E-03	2	3	"HLA-A,TAP1"
GO: Biological Process	regulation of smooth muscle cell-matrix adhesion	7.79E-04	7.53E-03	2	3	"SERPINE1,PLAU"
GO: Biological Process	positive regulation of metanephric mesenchymal cell migration	7.79E-04	7.53E-03	2	3	"PDGFB,PDGFA"
GO: Biological Process	mesenchymal cell proliferation involved in ureteric bud development	7.79E-04	7.53E-03	2	3	"GPC3,BMP4"
GO: Biological Process	positive regulation of MDA-5 signaling pathway	7.79E-04	7.53E-03	2	3	"DHX58,DDX60"
GO: Biological Process	regulation of metanephric mesenchymal cell migration by platelet-derived growth factor receptor-beta signaling pathway	7.79E-04	7.53E-03	2	3	"PDGFB,PDGFA"
GO: Biological Process	positive regulation of metanephric mesenchymal cell migration by platelet-derived growth factor receptor-beta signaling pathway	7.79E-04	7.53E-03	2	3	"PDGFB,PDGFA"
GO: Biological Process	response to hexose	7.81E-04	7.53E-03	9	150	"PIM3,HLA-DRB5,VCAM1,ANGPT2,UCP2,NR1D1,CTGF,LGALS1,EGR1"
GO: Biological Process	activation of cysteine-type endopeptidase activity involved in apoptotic process	7.97E-04	7.66E-03	7	93	"PPARG,DAP,XDH,F2R,MYC,ACER2,STAT1"
GO: Biological Process	cholesterol homeostasis	8.18E-04	7.85E-03	6	68	"ABCA1,FABP4,GPIHBP1,APOE,NR1D1,MALL"
GO: Biological Process	myeloid cell differentiation	8.30E-04	7.95E-03	14	322	"PPARG,GPC3,TIMP1,JUNB,ITGB3,ZFP36,BMP4,IRF7,INPP5D,MYC,TYROBP,IFI16,ISG15,ZBTB16"
GO: Biological Process	positive regulation of cartilage development	8.36E-04	7.97E-03	3	12	"BMP4,CYR61,ZBTB16"
GO: Biological Process	positive regulation of innate immune response	8.37E-04	7.97E-03	11	216	"DHX58,IRF7,TRIL,RSAD2,DDX60,NR1D1,CD14,CTSS,IFI16,MMP2,CD74"
GO: Biological Process	antigen processing and presentation of exogenous peptide antigen via MHC class II	8.49E-04	8.07E-03	7	94	"IFI30,HLA-DRB5,HLA-DQB1,HLA-DQA1,HLA-DMA,CTSS,CD74"
GO: Biological Process	regulation of cytokine production involved in immune response	8.66E-04	8.22E-03	5	46	"BST2,TRIL,RSAD2,SEMA7A,CD74"
GO: Biological Process	positive regulation of protein metabolic process	8.73E-04	8.24E-03	31	1044	"IL33,GPC3,GJA1,DAXX,HSPA2,CDKN1A,GADD45G,ITGB3,ITGA1,BMP4,CIRBP,IER3,RGCC,IL15,F2R,PSMB8,PSMB9,EDN1,EHD4,MAP3K6,PDGFB,PDGFA,APOE,IGF2,CCNY,CYR61,SEMA7A,CTGF,JDP2,PIM1,CD74"
GO: Biological Process	negative regulation of protein kinase activity	8.73E-04	8.24E-03	10	184	"CDKN1A,GADD45G,BMP4,FABP4,NR2F2,ERRFI1,UCHL1,SOCS3,APOE,ITPRIP"
GO: Biological Process	sterol homeostasis	8.84E-04	8.33E-03	6	69	"ABCA1,FABP4,GPIHBP1,APOE,NR1D1,MALL"
GO: Biological Process	positive regulation of T cell mediated cytotoxicity	8.89E-04	8.36E-03	4	27	"B2M,HLA-E,HLA-A,TAP1"
GO: Biological Process	regulation of cell morphogenesis	8.93E-04	8.38E-03	15	362	"SYNE3,SHROOM3,RGCC,VIM,GAS7,FBLIM1,APOE,CXCL12,FITM2,CDC42EP4,SEMA7A,TNFRSF12A,FN1,CDC42EP3,STAT1"
GO: Biological Process	hormone secretion	8.99E-04	8.41E-03	13	288	"PIM3,PPARG,KCNB1,INHBB,HLA-DRB5,APLN,MTNR1B,EDN1,LY6E,UCP2,NR1D1,NMB,MYRIP"
GO: Biological Process	ossification	9.35E-04	8.73E-03	14	326	"GPC3,GJA1,JUNB,BMP4,P2RY2,RSAD2,IGF2,NPNT,CYR61,CTGF,MGP,IFI16,ZBTB16,MMP2"
GO: Biological Process	response to alkaloid	9.50E-04	8.85E-03	8	124	"PPARG,ADA,BCL2L1,VCAM1,MYC,EDN1,IGF2,EGR1"
GO: Biological Process	negative regulation of angiogenesis	9.54E-04	8.87E-03	6	70	"SERPINE1,RGCC,CXCL10,ANGPT2,COL4A2,STAT1"
GO: Biological Process	negative regulation of leukocyte apoptotic process	9.57E-04	8.88E-03	5	47	"ADA,BMP4,IRF7,CXCL12,CD74"
GO: Biological Process	positive regulation of transport	9.81E-04	9.08E-03	22	650	"IL33,ABCA1,GPC3,CD274,BMP4,SELE,SERPINE1,P2RY2,RGCC,CXCL10,INHBB,HLA-DRB5,APLN,F2R,EDN1,PDGFB,APOE,CXCL12,CD14,NMB,MYRIP,CD63"
GO: Biological Process	negative regulation of RNA biosynthetic process	9.85E-04	9.10E-03	29	960	"PPARG,DAP,DAXX,SIK1,HOXD8,IFITM3,HMGA1,ZFP36,NR2F6,BMP4,IRF7,RASD1,NR1D2,FABP4,PER3,NR2F2,MYC,EDN1,ZNF423,PER1,GBP6,PDGFB,NR1D1,JDP2,IFI16,ZBTB16,EGR1,CRY2,STAT1"
GO: Biological Process	lymphocyte mediated immunity	1.01E-03	9.30E-03	11	221	"B2M,IRF7,INPP5D,HLA-E,HLA-DRB5,HLA-DQB1,HLA-A,HLA-DMA,RSAD2,TAP1,CD74"
GO: Biological Process	antigen processing and presentation of peptide antigen via MHC class II	1.02E-03	9.40E-03	7	97	"IFI30,HLA-DRB5,HLA-DQB1,HLA-DQA1,HLA-DMA,CTSS,CD74"
GO: Biological Process	cellular response to alcohol	1.03E-03	9.43E-03	6	71	"ABCA1,BMP4,INHBB,IL15,APOE,MMP2"
GO: Biological Process	response to monosaccharide	1.03E-03	9.43E-03	9	156	"PIM3,HLA-DRB5,VCAM1,ANGPT2,UCP2,NR1D1,CTGF,LGALS1,EGR1"
GO: Biological Process	positive regulation of neurogenesis	1.03E-03	9.43E-03	9	156	"ACE,PPARG,VIM,APOE,CXCL12,SEMA7A,TNFRSF12A,FN1,SERPINE2"
GO: Biological Process	regulation of T cell activation	1.05E-03	9.51E-03	12	257	"CD274,ADA,BMP4,HLA-DRB5,IL15,HLA-DQB1,HLA-DQA1,HLA-DMA,VCAM1,IGF2,LGALS1,CD74"
GO: Biological Process	regulation of T cell proliferation	1.05E-03	9.51E-03	8	126	"CD274,BMP4,HLA-DRB5,IL15,HLA-DQB1,HLA-DQA1,VCAM1,IGF2"
GO: Biological Process	cellular response to molecule of bacterial origin	1.05E-03	9.51E-03	8	126	"CMPK2,ABCA1,SERPINE1,GBP2,GBP6,NR1D1,CD14,STAT1"
GO: Biological Process	lung alveolus development	1.05E-03	9.51E-03	5	48	"ACE,ADA,BMP4,ERRFI1,PDGFA"
GO: Biological Process	negative regulation of T cell proliferation	1.05E-03	9.51E-03	5	48	"CD274,BMP4,HLA-DRB5,HLA-DQB1,HLA-DQA1"
GO: Biological Process	regulation of vasodilation	1.05E-03	9.51E-03	5	48	"ACE,GJA1,P2RY2,APLN,PDGFB"
GO: Biological Process	low-density lipoprotein receptor particle metabolic process	1.07E-03	9.62E-03	3	13	"PPARG,ITGB3,APOE"
GO: Biological Process	positive regulation of DNA biosynthetic process	1.07E-03	9.62E-03	3	13	"RGCC,MYC,PDGFB"
GO: Biological Process	negative regulation of macrophage derived foam cell differentiation	1.07E-03	9.62E-03	3	13	"ABCA1,PPARG,ITGB3"
GO: Biological Process	hormone transport	1.09E-03	9.67E-03	13	294	"PIM3,PPARG,KCNB1,INHBB,HLA-DRB5,APLN,MTNR1B,EDN1,LY6E,UCP2,NR1D1,NMB,MYRIP"
GO: Biological Process	hormone-mediated signaling pathway	1.09E-03	9.67E-03	7	98	"PPARG,NR2F6,BMP4,NR1D2,PRCP,NR2F2,NR1D1"
GO: Biological Process	antigen processing and presentation of peptide or polysaccharide antigen via MHC class II	1.09E-03	9.67E-03	7	98	"IFI30,HLA-DRB5,HLA-DQB1,HLA-DQA1,HLA-DMA,CTSS,CD74"
GO: Biological Process	regulation of leukocyte chemotaxis	1.11E-03	9.83E-03	6	72	"ZNF580,SERPINE1,CXCL10,EDN1,CXCL12,CD74"
GO: Biological Process	negative regulation of leukocyte activation	1.11E-03	9.83E-03	8	127	"CD274,BMP4,INPP5D,HLA-DRB5,HLA-DQB1,HLA-DQA1,MNDA,CD74"
GO: Biological Process	behavior	1.15E-03	1.02E-02	22	658	"ACE,ZNF580,GJA1,DBH,ADA,SERPINE1,CXCL10,APLN,GPRC5B,EDN1,ANGPT2,UCK2,UCHL1,MDK,PDGFB,CXCL12,IGF2,FN1,CDH13,EGR1,CD74,SERPINE2"
GO: Biological Process	positive chemotaxis	1.16E-03	1.02E-02	5	49	"BMP4,ANGPT2,PDGFB,CXCL12,CDH13"
GO: Biological Process	cellular response to ionizing radiation	1.16E-03	1.02E-02	5	49	"CDKN1A,BCL2L1,RHOB,IFI16,EGR1"
GO: Biological Process	positive regulation of kinase activity	1.17E-03	1.03E-02	18	491	"DAXX,HSPA2,CDKN1A,GADD45G,ITGB3,ITGA1,BMP4,RGCC,F2R,EDN1,MAP3K6,PDGFB,PDGFA,IGF2,CCNY,CYR61,PIM1,CD74"
GO: Biological Process	modulation by virus of host morphology or physiology	1.17E-03	1.03E-02	4	29	"BCL2L1,MYC,TAP1,IFIT1"
GO: Biological Process	kidney epithelium development	1.19E-03	1.04E-02	6	73	"GPC3,IRX3,BMP4,PDGFB,AQP11,STAT1"
GO: Biological Process	negative regulation of catalytic activity	1.21E-03	1.05E-02	23	704	"SERPINA3,PPARG,GPC3,TIMP1,CDKN1A,GADD45G,BCL2L1,BST2,BMP4,SERPINE1,FABP4,NR2F2,PSMB8,PSMB9,ERRFI1,UCHL1,SOCS3,APOE,ITPRIP,IFIT1,IFI16,CRY2,SERPINE2"
GO: Biological Process	morphogenesis of a branching structure	1.21E-03	1.05E-02	11	226	"TGM2,GPC3,BMP4,MYC,EDN1,PDGFB,PDGFA,SOCS3,CXCL12,NPNT,MGP"
GO: Biological Process	positive regulation of secretion	1.23E-03	1.07E-02	13	298	"IL33,CD274,P2RY2,RGCC,INHBB,HLA-DRB5,APLN,F2R,EDN1,CXCL12,CD14,NMB,MYRIP"
GO: Biological Process	response to ionizing radiation	1.23E-03	1.07E-02	8	129	"CDKN1A,BCL2L1,CXCL10,VCAM1,MYC,RHOB,IFI16,EGR1"
GO: Biological Process	regulation of mitotic cell cycle	1.24E-03	1.07E-02	15	374	"PIM3,CDKN1A,SIK1,BCL2L1,BMP4,IER3,RGCC,NEK6,MYC,PSMB8,PSMB9,EDN1,PDGFB,IGF2,PIM1"
GO: Biological Process	negative regulation of cellular macromolecule biosynthetic process	1.24E-03	1.07E-02	31	1067	"PPARG,DAP,DAXX,SIK1,HOXD8,HMGA1,ZFP36,NR2F6,BMP4,IRF7,CIRBP,RASD1,NR1D2,FABP4,PER3,NR2F2,MYC,EDN1,ACER2,ZNF423,PER1,GBP6,PDGFB,IGF2BP1,NR1D1,JDP2,IFI16,ZBTB16,EGR1,CRY2,STAT1"
GO: Biological Process	neuron projection development	1.26E-03	1.09E-02	26	839	"GJA1,RTN4RL2,EFHD1,UNC5A,ITGB3,ITGA1,P2RY2,WEE1,VIM,GPRC5B,GAS7,S100A6,UCHL1,APOE,CXCL12,COL4A1,COL4A2,SEMA7A,TYROBP,TNFRSF12A,FN1,LGALS1,RHOB,FLRT2,MMP2,SERPINE2"
GO: Biological Process	regulation of leukocyte differentiation	1.30E-03	1.12E-02	11	228	"ADA,ITGB3,BMP4,IRF7,INPP5D,IL15,HLA-DQA1,HLA-DMA,MYC,TYROBP,CD74"
GO: Biological Process	regulation of peptide hormone secretion	1.30E-03	1.12E-02	10	194	"PIM3,PPARG,KCNB1,INHBB,HLA-DRB5,APLN,MTNR1B,UCP2,NR1D1,MYRIP"
GO: Biological Process	positive regulation of BMP signaling pathway	1.34E-03	1.14E-02	4	30	"GPC3,BMP4,ZNF423,CYR61"
GO: Biological Process	negative regulation of carbohydrate metabolic process	1.34E-03	1.14E-02	4	30	"SIK1,IER3,ACER2,DDIT4"
GO: Biological Process	T cell proliferation	1.34E-03	1.14E-02	9	162	"CD274,BMP4,HLA-DRB5,IL15,HLA-DQB1,HLA-DQA1,VCAM1,CXCL12,IGF2"
GO: Biological Process	cellular response to cholesterol	1.35E-03	1.14E-02	3	14	"ABCA1,INHBB,APOE"
GO: Biological Process	cytoplasmic pattern recognition receptor signaling pathway in response to virus	1.35E-03	1.14E-02	3	14	"DHX58,IRF7,DDX60"
GO: Biological Process	sequestering of triglyceride	1.35E-03	1.14E-02	3	14	"PPARG,FITM2,PNPLA2"
GO: Biological Process	angiogenesis involved in wound healing	1.35E-03	1.14E-02	3	14	"ITGB3,SERPINE1,PRCP"
GO: Biological Process	production of molecular mediator of immune response	1.35E-03	1.15E-02	8	131	"IL33,BST2,TRIL,HLA-DRB5,HLA-DQB1,RSAD2,SEMA7A,CD74"
GO: Biological Process	actin filament-based process	1.38E-03	1.17E-02	20	582	"GJA1,ACTN1,BST2,SELE,SYNPO,SHROOM3,RGCC,FAM101B,VIM,CAPG,EDN1,GAS7,PDGFB,PDGFA,CXCL12,SHROOM2,CTGF,ARHGDIB,ELN,MYRIP"
GO: Biological Process	defense response to Gram-positive bacterium	1.39E-03	1.17E-02	5	51	"GBP2,GBP3,GBP4,GBP6,GBP7"
GO: Biological Process	cell-matrix adhesion	1.40E-03	1.18E-02	9	163	"ACTN1,ITGB3,SERPINE1,ACER2,NPNT,CTGF,FN1,PLAU,CDH13"
GO: Biological Process	protein processing	1.41E-03	1.18E-02	12	266	"ACE,PPARG,DAP,CFB,SERPINE1,XDH,F2R,MYC,ACER2,IFI16,STAT1,SERPINE2"
GO: Biological Process	enzyme linked receptor protein signaling pathway	1.44E-03	1.20E-02	29	984	"GPC3,PMEPA1,CDKN1A,JUNB,SULF2,ITGB3,ITGA1,BMP4,SERPINE1,XDH,INHBB,BMPER,MYC,ANGPT2,ZNF423,ERRFI1,CRIM1,PDGFB,PDGFA,SOCS3,IGF2,IGFBP3,NPNT,CYR61,CTGF,CDH13,EGR1,STAT1,DDIT4"
GO: Biological Process	positive regulation of protein phosphorylation	1.44E-03	1.21E-02	22	670	"DAXX,HSPA2,CDKN1A,GADD45G,ITGB3,ITGA1,BMP4,RGCC,IL15,F2R,EDN1,EHD4,MAP3K6,PDGFB,PDGFA,IGF2,CCNY,CYR61,SEMA7A,CTGF,PIM1,CD74"
GO: Biological Process	regulation of reactive oxygen species metabolic process	1.47E-03	1.22E-02	6	76	"CDKN1A,XDH,IER3,PRCP,PDGFB,PLAU"
GO: Biological Process	regulation of collagen biosynthetic process	1.52E-03	1.24E-02	4	31	"BMP4,RGCC,F2R,CTGF"
GO: Biological Process	regulation of T cell mediated cytotoxicity	1.52E-03	1.24E-02	4	31	"B2M,HLA-E,HLA-A,TAP1"
GO: Biological Process	negative regulation of endothelial cell migration	1.52E-03	1.24E-02	4	31	"RGCC,NR2F2,ANGPT2,APOE"
GO: Biological Process	mesenchymal cell proliferation	1.52E-03	1.24E-02	5	52	"GPC3,BMP4,MYC,PDGFA,STAT1"
GO: Biological Process	positive regulation of transferase activity	1.53E-03	1.24E-02	18	503	"DAXX,HSPA2,CDKN1A,GADD45G,ITGB3,ITGA1,BMP4,RGCC,F2R,EDN1,MAP3K6,PDGFB,PDGFA,IGF2,CCNY,CYR61,PIM1,CD74"
GO: Biological Process	negative regulation of epithelial cell proliferation	1.54E-03	1.24E-02	7	104	"GPC3,BMP4,XDH,RGCC,NR2F2,APOE,STAT1"
GO: Biological Process	positive regulation of glomerular filtration	1.54E-03	1.24E-02	2	4	"GJA1,PDGFB"
GO: Biological Process	regulation of metanephric mesenchymal cell migration	1.54E-03	1.24E-02	2	4	"PDGFB,PDGFA"
GO: Biological Process	positive regulation of RIG-I signaling pathway	1.54E-03	1.24E-02	2	4	"DHX58,DDX60"
GO: Biological Process	antigen processing and presentation of peptide antigen via MHC class Ib	1.54E-03	1.24E-02	2	4	"B2M,HLA-E"
GO: Biological Process	positive regulation of glomerular mesangial cell proliferation	1.54E-03	1.24E-02	2	4	"PDGFB,EGR1"
GO: Biological Process	metanephric glomerular mesangial cell proliferation involved in metanephros development	1.54E-03	1.24E-02	2	4	"PDGFB,EGR1"
GO: Biological Process	regulation of MDA-5 signaling pathway	1.54E-03	1.24E-02	2	4	"DHX58,DDX60"
GO: Biological Process	negative regulation of phospholipid biosynthetic process	1.54E-03	1.24E-02	2	4	"PDGFB,PDGFA"
GO: Biological Process	cell migration involved in metanephros development	1.54E-03	1.24E-02	2	4	"PDGFB,PDGFA"
GO: Biological Process	metanephric mesenchymal cell migration	1.54E-03	1.24E-02	2	4	"PDGFB,PDGFA"
GO: Biological Process	glomerular mesangial cell development	1.54E-03	1.24E-02	2	4	"ACTA2,PDGFB"
GO: Biological Process	positive regulation of ovulation	1.54E-03	1.24E-02	2	4	"INHBB,PLAU"
GO: Biological Process	regulation of cellular localization	1.57E-03	1.27E-02	27	898	"IL33,PIM3,PPARG,CD274,CDKN1A,KCNB1,BCL2L1,BST2,BMP4,MX2,IER3,RGCC,CXCL10,INHBB,HLA-DRB5,APLN,F2R,MTNR1B,EDN1,RSAD2,GBP6,UCP2,CXCL12,NR1D1,CD14,NMB,MYRIP"
GO: Biological Process	connective tissue development	1.60E-03	1.28E-02	11	234	"ACTA2,SULF2,BMP4,EDN1,PDGFB,PDGFA,CYR61,CTGF,MGP,ZBTB16,EGR1"
GO: Biological Process	negative regulation of RNA metabolic process	1.62E-03	1.30E-02	29	992	"PPARG,DAP,DAXX,SIK1,HOXD8,IFITM3,HMGA1,ZFP36,NR2F6,BMP4,IRF7,RASD1,NR1D2,FABP4,PER3,NR2F2,MYC,EDN1,ZNF423,PER1,GBP6,PDGFB,NR1D1,JDP2,IFI16,ZBTB16,EGR1,CRY2,STAT1"
GO: Biological Process	regulation of cysteine-type endopeptidase activity involved in apoptotic process	1.64E-03	1.31E-02	10	200	"PPARG,DAP,BCL2L1,XDH,F2R,MYC,ACER2,CYR61,CTGF,STAT1"
GO: Biological Process	T cell differentiation	1.64E-03	1.31E-02	10	200	"B2M,GADD45G,ADA,BMP4,IL15,HLA-DQA1,HLA-DMA,RSAD2,EGR1,CD74"
GO: Biological Process	striated muscle tissue development	1.64E-03	1.31E-02	14	346	"GJA1,SIK1,BMP4,NR1D2,NR2F2,ALDH1A2,MYC,LY6E,IGFBP3,MKL2,CYP26B1,ELN,MAFF,EGR1"
GO: Biological Process	peptide hormone secretion	1.65E-03	1.31E-02	11	235	"PIM3,PPARG,KCNB1,INHBB,HLA-DRB5,APLN,MTNR1B,EDN1,UCP2,NR1D1,MYRIP"
GO: Biological Process	regulation of T cell mediated immunity	1.65E-03	1.31E-02	5	53	"B2M,HLA-E,HLA-A,RSAD2,TAP1"
GO: Biological Process	cellular response to sterol	1.67E-03	1.32E-02	3	15	"ABCA1,INHBB,APOE"
GO: Biological Process	regulation of hormone levels	1.67E-03	1.32E-02	17	466	"ACE,PIM3,PPARG,KCNB1,INHBB,HLA-DRB5,APLN,ALDH1A2,MTNR1B,EDN1,LY6E,UCP2,IGF2,NR1D1,CYP26B1,NMB,MYRIP"
GO: Biological Process	"negative regulation of transcription, DNA-templated"	1.68E-03	1.32E-02	28	948	"PPARG,DAP,DAXX,SIK1,HOXD8,HMGA1,ZFP36,NR2F6,BMP4,IRF7,RASD1,NR1D2,FABP4,PER3,NR2F2,MYC,EDN1,ZNF423,PER1,GBP6,PDGFB,NR1D1,JDP2,IFI16,ZBTB16,EGR1,CRY2,STAT1"
GO: Biological Process	cellular response to glucose stimulus	1.68E-03	1.32E-02	6	78	"PIM3,HLA-DRB5,VCAM1,UCP2,NR1D1,LGALS1"
GO: Biological Process	negative regulation of T cell activation	1.68E-03	1.32E-02	6	78	"CD274,BMP4,HLA-DRB5,HLA-DQB1,HLA-DQA1,CD74"
GO: Biological Process	regulation of leukocyte apoptotic process	1.68E-03	1.32E-02	6	78	"ADA,BMP4,IRF7,MYC,CXCL12,CD74"
GO: Biological Process	placenta blood vessel development	1.71E-03	1.34E-02	4	32	"JUNB,NR2F2,SOCS3,CYR61"
GO: Biological Process	cell chemotaxis	1.76E-03	1.38E-02	10	202	"ZNF580,HOXB9,ITGA1,SERPINE1,CXCL10,VCAM1,EDN1,PDGFB,CXCL12,CD74"
GO: Biological Process	DNA biosynthetic process	1.80E-03	1.40E-02	5	54	"CDKN1A,RGCC,MYC,PDGFB,PDGFA"
GO: Biological Process	nephron epithelium development	1.80E-03	1.40E-02	5	54	"GPC3,IRX3,BMP4,AQP11,STAT1"
GO: Biological Process	regulation of axon extension	1.80E-03	1.40E-02	5	54	"APOE,CXCL12,SEMA7A,TNFRSF12A,FN1"
GO: Biological Process	positive regulation of endothelial cell migration	1.80E-03	1.40E-02	5	54	"ZNF580,ITGB3,BMP4,EDN1,PDGFB"
GO: Biological Process	tissue morphogenesis	1.81E-03	1.40E-02	19	553	"TGM2,GPC3,GJA1,IRX3,BMP4,SHROOM3,ALDH1A2,MYC,EDN1,LY6E,PDGFB,PDGFA,SOCS3,CXCL12,NPNT,CYR61,MGP,STAT1,MMP2"
GO: Biological Process	cell projection organization	1.82E-03	1.41E-02	32	1141	"GJA1,RTN4RL2,EFHD1,UNC5A,ITGB3,ITGA1,TTC30B,P2RY2,WEE1,VIM,GPRC5B,CAPG,GAS7,S100A6,UCHL1,PDGFB,PDGFA,APOE,CXCL12,COL4A1,COL4A2,CDC42EP4,SEMA7A,TYROBP,TNFRSF12A,FN1,LGALS1,RHOB,FLRT2,CDH13,MMP2,SERPINE2"
GO: Biological Process	negative regulation of kinase activity	1.83E-03	1.41E-02	10	203	"CDKN1A,GADD45G,BMP4,FABP4,NR2F2,ERRFI1,UCHL1,SOCS3,APOE,ITPRIP"
GO: Biological Process	positive regulation of cellular protein metabolic process	1.87E-03	1.44E-02	28	955	"IL33,DAXX,HSPA2,CDKN1A,GADD45G,ITGB3,ITGA1,BMP4,CIRBP,RGCC,IL15,F2R,PSMB8,PSMB9,EDN1,EHD4,MAP3K6,PDGFB,PDGFA,APOE,IGF2,CCNY,CYR61,SEMA7A,CTGF,JDP2,PIM1,CD74"
GO: Biological Process	response to nutrient	1.88E-03	1.44E-02	9	170	"ABCA1,PPARG,ADA,CYBB,CXCL10,IL15,ALDH1A2,VCAM1,STAT1"
GO: Biological Process	regulation of production of molecular mediator of immune response	1.91E-03	1.46E-02	6	80	"IL33,BST2,TRIL,RSAD2,SEMA7A,CD74"
GO: Biological Process	cellular response to hexose stimulus	1.91E-03	1.46E-02	6	80	"PIM3,HLA-DRB5,VCAM1,UCP2,NR1D1,LGALS1"
GO: Biological Process	positive regulation of lymphocyte differentiation	1.91E-03	1.46E-02	6	80	"ADA,INPP5D,IL15,HLA-DQA1,HLA-DMA,CD74"
GO: Biological Process	positive regulation of vasoconstriction	1.92E-03	1.46E-02	4	33	"GJA1,DBH,F2R,PDGFB"
GO: Biological Process	regulation of collagen metabolic process	1.92E-03	1.46E-02	4	33	"BMP4,RGCC,F2R,CTGF"
GO: Biological Process	regulation of B cell proliferation	1.95E-03	1.48E-02	5	55	"CDKN1A,ADA,INPP5D,MNDA,CD74"
GO: Biological Process	positive regulation of axonogenesis	1.95E-03	1.48E-02	5	55	"APOE,CXCL12,SEMA7A,TNFRSF12A,FN1"
GO: Biological Process	regulation of type I interferon production	2.01E-03	1.53E-02	7	109	"UBE2L6,DHX58,IRF7,NLRC5,GBP6,IFI16,ISG15"
GO: Biological Process	regulation of triglyceride biosynthetic process	2.03E-03	1.53E-02	3	16	"THRSP,SIK1,FITM2"
GO: Biological Process	positive regulation of cytosolic calcium ion concentration involved in phospholipase C-activating G-protein coupled signaling pathway	2.03E-03	1.53E-02	3	16	"TGM2,F2R,EDN1"
GO: Biological Process	response to thyroid hormone	2.03E-03	1.53E-02	3	16	"CFB,KLF9,CTSS"
GO: Biological Process	cellular response to monosaccharide stimulus	2.04E-03	1.53E-02	6	81	"PIM3,HLA-DRB5,VCAM1,UCP2,NR1D1,LGALS1"
GO: Biological Process	cellular response to acid	2.06E-03	1.55E-02	8	140	"ABCA1,BCL2L1,ALDH1A2,PDGFB,COL4A1,CYP26B1,EGR1,MMP2"
GO: Biological Process	cell morphogenesis	2.08E-03	1.56E-02	31	1103	"SYNE3,GJA1,COL18A1,UNC5A,ITGB3,ITGA1,BMP4,WEE1,SHROOM3,RGCC,FAM101B,VIM,GAS7,FBLIM1,S100A6,UCHL1,APOE,CXCL12,FITM2,COL4A1,COL4A2,CDC42EP4,SEMA7A,SHROOM2,TYROBP,TNFRSF12A,FN1,RHOB,FLRT2,CDC42EP3,STAT1"
GO: Biological Process	cytokine production involved in immune response	2.12E-03	1.58E-02	5	56	"BST2,TRIL,RSAD2,SEMA7A,CD74"
GO: Biological Process	nephron epithelium morphogenesis	2.15E-03	1.61E-02	4	34	"GPC3,IRX3,BMP4,STAT1"
GO: Biological Process	cellular response to biotic stimulus	2.16E-03	1.61E-02	8	141	"CMPK2,ABCA1,SERPINE1,GBP2,GBP6,NR1D1,CD14,STAT1"
GO: Biological Process	ear development	2.18E-03	1.63E-02	10	208	"BMP4,HLA-E,BMPER,HLA-A,HLA-DMA,MYC,EDN1,PDGFA,SHROOM2,IFI16"
GO: Biological Process	type I interferon production	2.23E-03	1.65E-02	7	111	"UBE2L6,DHX58,IRF7,NLRC5,GBP6,IFI16,ISG15"
GO: Biological Process	positive regulation of lymphocyte proliferation	2.23E-03	1.65E-02	7	111	"CD274,CDKN1A,ADA,IL15,VCAM1,IGF2,CD74"
GO: Biological Process	neuron development	2.23E-03	1.65E-02	28	967	"GJA1,RTN4RL2,EFHD1,UNC5A,ITGB3,NR2F6,ITGA1,P2RY2,WEE1,VIM,GPRC5B,GAS7,S100A6,UCHL1,APOE,CXCL12,COL4A1,COL4A2,SEMA7A,TYROBP,TNFRSF12A,FN1,LGALS1,RHOB,FLRT2,LHX6,MMP2,SERPINE2"
GO: Biological Process	immune response-regulating signaling pathway	2.28E-03	1.68E-02	17	480	"DHX58,CDKN1A,ADA,IRF7,TRIL,INPP5D,HLA-DRB5,HLA-DQB1,HLA-DQA1,RSAD2,DDX60,PDGFB,PDGFA,NR1D1,CD14,CTSS,MNDA"
GO: Biological Process	response to axon injury	2.29E-03	1.69E-02	5	57	"RTN4RL2,UCK2,APOE,LGALS1,MMP2"
GO: Biological Process	positive regulation of mononuclear cell proliferation	2.35E-03	1.72E-02	7	112	"CD274,CDKN1A,ADA,IL15,VCAM1,IGF2,CD74"
GO: Biological Process	regulation of response to biotic stimulus	2.35E-03	1.72E-02	7	112	"B2M,DHX58,IL15,HLA-A,DDX60,GBP6,IFIT1"
GO: Biological Process	sensory perception of pain	2.35E-03	1.72E-02	7	112	"ACE,NR2F6,P2RY2,F2R,EDN1,UCHL1,CTSS"
GO: Biological Process	protein maturation	2.36E-03	1.73E-02	12	283	"ACE,PPARG,DAP,CFB,SERPINE1,XDH,F2R,MYC,ACER2,IFI16,STAT1,SERPINE2"
GO: Biological Process	heterophilic cell-cell adhesion	2.40E-03	1.75E-02	4	35	"SELE,AMIGO2,VCAM1,LGALS1"
GO: Biological Process	positive regulation of multicellular organismal metabolic process	2.40E-03	1.75E-02	4	35	"BMP4,RGCC,F2R,CTGF"
GO: Biological Process	regulation of cell adhesion mediated by integrin	2.40E-03	1.75E-02	4	35	"ADA,SERPINE1,ACER2,PLAU"
GO: Biological Process	positive regulation of nitrogen compound metabolic process	2.42E-03	1.76E-02	37	1405	"IL33,ABCA1,PPARG,DBP,HOXB9,JUNB,KLF9,HMGA1,ZFP36,BMP4,SERPINE1,IRF7,NLRC5,RGCC,CXCL10,NR1D2,TEF,NR2F2,F2R,MYC,EDN1,ZNF423,MDK,PDGFB,PDGFA,APOE,IGF2,MKL2,NPNT,CYR61,DDAH1,NR1D1,IFI16,ZBTB16,CDH13,EGR1,STAT1"
GO: Biological Process	secretory granule organization	2.43E-03	1.76E-02	3	17	"ABCA1,F2R,SERPINE2"
GO: Biological Process	renal system process involved in regulation of blood volume	2.43E-03	1.76E-02	3	17	"GJA1,F2R,PDGFB"
GO: Biological Process	regulation of reproductive process	2.45E-03	1.77E-02	6	84	"TIMP1,ADA,BMP4,P2RY2,INHBB,PLAU"
GO: Biological Process	negative regulation of response to external stimulus	2.47E-03	1.77E-02	9	177	"PPARG,DHX58,ADA,ZFP36,SERPINE1,IER3,ANGPT2,APOE,IFIT1"
GO: Biological Process	skeletal muscle tissue development	2.47E-03	1.77E-02	9	177	"BMP4,NR1D2,NR2F2,MYC,IGFBP3,CYP26B1,ELN,MAFF,EGR1"
GO: Biological Process	response to retinoic acid	2.47E-03	1.77E-02	7	113	"ABCA1,PPARG,ALDH1A2,ACER2,PDGFA,APOE,CYP26B1"
GO: Biological Process	regulation of cell shape	2.47E-03	1.77E-02	7	113	"SYNE3,SHROOM3,GAS7,FBLIM1,CDC42EP4,FN1,CDC42EP3"
GO: Biological Process	muscle tissue development	2.49E-03	1.77E-02	14	362	"GJA1,SIK1,BMP4,NR1D2,NR2F2,ALDH1A2,MYC,LY6E,IGFBP3,MKL2,CYP26B1,ELN,MAFF,EGR1"
GO: Biological Process	neuron differentiation	2.51E-03	1.77E-02	33	1213	"GJA1,RTN4RL2,EFHD1,UNC5A,IRX3,ITGB3,ROM1,NR2F6,ITGA1,BMP4,P2RY2,WEE1,VIM,GPRC5B,ALDH1A2,GAS7,S100A6,UCHL1,APOE,CXCL12,COL4A1,COL4A2,SEMA7A,TYROBP,TNFRSF12A,FN1,LGALS1,RHOB,FLRT2,LHX6,MMP2,SERPINE2,DDIT4"
GO: Biological Process	intracellular protein transport in other organism involved in symbiotic interaction	2.54E-03	1.77E-02	2	5	"TAP1,IFIT1"
GO: Biological Process	smooth muscle cell-matrix adhesion	2.54E-03	1.77E-02	2	5	"SERPINE1,PLAU"
GO: Biological Process	negative regulation of mature B cell apoptotic process	2.54E-03	1.77E-02	2	5	"ADA,CD74"
GO: Biological Process	symbiont intracellular protein transport in host	2.54E-03	1.77E-02	2	5	"TAP1,IFIT1"
GO: Biological Process	intracellular transport of viral protein in host cell	2.54E-03	1.77E-02	2	5	"TAP1,IFIT1"
GO: Biological Process	positive regulation of germinal center formation	2.54E-03	1.77E-02	2	5	"ADA,HLA-DMA"
GO: Biological Process	cell migration involved in kidney development	2.54E-03	1.77E-02	2	5	"PDGFB,PDGFA"
GO: Biological Process	negative regulation of kidney development	2.54E-03	1.77E-02	2	5	"BMP4,STAT1"
GO: Biological Process	regulation of mature B cell apoptotic process	2.54E-03	1.77E-02	2	5	"ADA,CD74"
GO: Biological Process	negative regulation of monocyte differentiation	2.54E-03	1.77E-02	2	5	"INPP5D,MYC"
GO: Biological Process	regulation by virus of viral protein levels in host cell	2.54E-03	1.77E-02	2	5	"TAP1,IFIT1"
GO: Biological Process	negative regulation of plasminogen activation	2.54E-03	1.77E-02	2	5	"SERPINE1,SERPINE2"
GO: Biological Process	regulation of ovulation	2.54E-03	1.77E-02	2	5	"INHBB,PLAU"
GO: Biological Process	metanephric glomerular mesangium development	2.54E-03	1.77E-02	2	5	"PDGFB,EGR1"
GO: Biological Process	negative regulation of sequestering of triglyceride	2.54E-03	1.77E-02	2	5	"PPARG,PNPLA2"
GO: Biological Process	mature B cell apoptotic process	2.54E-03	1.77E-02	2	5	"ADA,CD74"
GO: Biological Process	mesangial cell development	2.54E-03	1.77E-02	2	5	"ACTA2,PDGFB"
GO: Biological Process	glomerular mesangial cell differentiation	2.54E-03	1.77E-02	2	5	"ACTA2,PDGFB"
GO: Biological Process	extracellular matrix constituent secretion	2.54E-03	1.77E-02	2	5	"RGCC,CTGF"
GO: Biological Process	response to carbohydrate	2.66E-03	1.83E-02	9	179	"PIM3,HLA-DRB5,VCAM1,ANGPT2,UCP2,NR1D1,CTGF,LGALS1,EGR1"
GO: Biological Process	regulation of ossification	2.66E-03	1.83E-02	9	179	"GJA1,BMP4,P2RY2,RSAD2,NPNT,CYR61,MGP,IFI16,ZBTB16"
GO: Biological Process	negative regulation of cell-substrate adhesion	2.66E-03	1.83E-02	4	36	"SERPINE1,ANGPT2,ACER2,LGALS1"
GO: Biological Process	collagen biosynthetic process	2.66E-03	1.83E-02	4	36	"BMP4,RGCC,F2R,CTGF"
GO: Biological Process	epithelial cell differentiation involved in kidney development	2.66E-03	1.83E-02	4	36	"ACTA2,BMP4,PDGFB,STAT1"
GO: Biological Process	positive regulation of leukocyte proliferation	2.73E-03	1.87E-02	7	115	"CD274,CDKN1A,ADA,IL15,VCAM1,IGF2,CD74"
GO: Biological Process	liver development	2.73E-03	1.87E-02	7	115	"DBP,ADA,ALDH1A2,UCP2,MKL2,FPGS,PLAU"
GO: Biological Process	activation of innate immune response	2.87E-03	1.96E-02	9	181	"DHX58,IRF7,TRIL,RSAD2,DDX60,NR1D1,CD14,CTSS,IFI16"
GO: Biological Process	positive regulation of developmental growth	2.87E-03	1.96E-02	5	60	"APOE,CXCL12,SEMA7A,TNFRSF12A,FN1"
GO: Biological Process	kidney mesenchyme development	2.88E-03	1.97E-02	3	18	"BMP4,MYC,STAT1"
GO: Biological Process	cellular component morphogenesis	2.91E-03	1.98E-02	32	1176	"SYNE3,GJA1,COL18A1,UNC5A,ITGB3,ITGA1,BMP4,WEE1,SHROOM3,RGCC,FAM101B,VIM,EDN1,GAS7,FBLIM1,S100A6,UCHL1,APOE,CXCL12,FITM2,COL4A1,COL4A2,CDC42EP4,SEMA7A,SHROOM2,TYROBP,TNFRSF12A,FN1,RHOB,FLRT2,CDC42EP3,STAT1"
GO: Biological Process	renal system process	2.92E-03	1.99E-02	6	87	"GJA1,SULF2,BMP4,F2R,EDN1,PDGFB"
GO: Biological Process	regulation of cell development	2.93E-03	1.99E-02	21	665	"ACE,PPARG,GPR56,IRX3,BMP4,P2RY2,RGCC,VIM,GPRC5B,EDN1,APOE,CXCL12,IGFBP3,SEMA7A,TYROBP,TNFRSF12A,FN1,LGALS1,FLRT2,STAT1,SERPINE2"
GO: Biological Process	negative regulation of lipid biosynthetic process	2.95E-03	2.00E-02	4	37	"SIK1,PDGFB,PDGFA,APOE"
GO: Biological Process	positive regulation of lipid metabolic process	3.00E-03	2.03E-02	7	117	"PPARG,PDGFB,APOE,PNPLA2,IGF2,CYR61,NR1D1"
GO: Biological Process	hepaticobiliary system development	3.00E-03	2.03E-02	7	117	"DBP,ADA,ALDH1A2,UCP2,MKL2,FPGS,PLAU"
GO: Biological Process	leukocyte chemotaxis	3.04E-03	2.05E-02	8	149	"ZNF580,ITGA1,SERPINE1,CXCL10,EDN1,PDGFB,CXCL12,CD74"
GO: Biological Process	immune response-activating signal transduction	3.10E-03	2.09E-02	14	371	"DHX58,ADA,IRF7,TRIL,INPP5D,HLA-DRB5,HLA-DQB1,HLA-DQA1,RSAD2,DDX60,NR1D1,CD14,CTSS,MNDA"
GO: Biological Process	regulation of actin cytoskeleton organization	3.17E-03	2.13E-02	10	219	"BST2,SYNPO,RGCC,CAPG,EDN1,PDGFA,CXCL12,SHROOM2,CTGF,ELN"
GO: Biological Process	positive regulation of protein modification process	3.21E-03	2.16E-02	25	852	"DAXX,HSPA2,CDKN1A,GADD45G,ITGB3,ITGA1,BMP4,RGCC,IL15,F2R,PSMB8,PSMB9,EDN1,EHD4,MAP3K6,PDGFB,PDGFA,IGF2,CCNY,CYR61,SEMA7A,CTGF,JDP2,PIM1,CD74"
GO: Biological Process	positive regulation of cellular component organization	3.25E-03	2.18E-02	21	671	"GPC3,SELE,SERPINE1,P2RY2,SYNPO,RGCC,GPRC5B,EDN1,PDGFB,APOE,CXCL12,IGF2,CDC42EP4,SEMA7A,CTGF,JDP2,TNFRSF12A,CD14,FN1,SERPINE2,CD63"
GO: Biological Process	nephron morphogenesis	3.25E-03	2.18E-02	4	38	"GPC3,IRX3,BMP4,STAT1"
GO: Biological Process	skeletal muscle organ development	3.31E-03	2.21E-02	9	185	"BMP4,NR1D2,NR2F2,MYC,IGFBP3,CYP26B1,ELN,MAFF,EGR1"
GO: Biological Process	defense response to bacterium	3.31E-03	2.21E-02	9	185	"SERPINE1,IRGM,GBP2,GBP3,HLA-A,GBP4,GBP6,GBP7,ISG15"
GO: Biological Process	skeletal muscle cell differentiation	3.31E-03	2.21E-02	5	62	"NR1D2,MYC,CYP26B1,MAFF,EGR1"
GO: Biological Process	positive regulation of muscle organ development	3.38E-03	2.25E-02	3	19	"GJA1,BMP4,MKL2"
GO: Biological Process	positive regulation of striated muscle tissue development	3.38E-03	2.25E-02	3	19	"GJA1,BMP4,MKL2"
GO: Biological Process	regulation of B cell apoptotic process	3.38E-03	2.25E-02	3	19	"ADA,MYC,CD74"
GO: Biological Process	placenta development	3.43E-03	2.27E-02	8	152	"PPARG,ADA,JUNB,NR2F2,VCAM1,PDGFB,SOCS3,CYR61"
GO: Biological Process	cellular chemical homeostasis	3.44E-03	2.28E-02	19	586	"TGM2,PIM3,GJA1,P2RY2,ABCG2,CXCL10,HLA-DRB5,F2R,VCAM1,MYC,EDN1,UCP2,APOE,CXCL12,FITM2,NR1D1,LGALS1,NMB,AQP11"
GO: Biological Process	cellular response to carbohydrate stimulus	3.46E-03	2.29E-02	6	90	"PIM3,HLA-DRB5,VCAM1,UCP2,NR1D1,LGALS1"
GO: Biological Process	positive regulation of nuclear division	3.58E-03	2.35E-02	4	39	"RGCC,EDN1,PDGFB,IGF2"
GO: Biological Process	positive regulation of mitosis	3.58E-03	2.35E-02	4	39	"RGCC,EDN1,PDGFB,IGF2"
GO: Biological Process	modification by symbiont of host morphology or physiology	3.58E-03	2.35E-02	4	39	"BCL2L1,MYC,TAP1,IFIT1"
GO: Biological Process	cellular response to hormone stimulus	3.67E-03	2.41E-02	17	503	"PPARG,JUNB,KLF9,NR2F6,BMP4,NR1D2,INHBB,PRCP,NR2F2,UCP2,SOCS3,IGF2,NR1D1,CTSS,EGR1,STAT1,MMP2"
GO: Biological Process	regulation of cellular response to stress	3.75E-03	2.43E-02	14	379	"SERINC3,DAXX,GADD45G,BCL2L1,HMGA1,XDH,IER3,NEK6,MYC,EDN1,MAP3K6,CXCL12,CTGF,CD74"
GO: Biological Process	renal interstitial cell development	3.77E-03	2.43E-02	2	6	"ACTA2,PDGFB"
GO: Biological Process	pigment accumulation	3.77E-03	2.43E-02	2	6	"SHROOM3,SHROOM2"
GO: Biological Process	blood vessel endothelial cell proliferation involved in sprouting angiogenesis	3.77E-03	2.43E-02	2	6	"BMP4,BMPER"
GO: Biological Process	negative regulation of cholesterol storage	3.77E-03	2.43E-02	2	6	"ABCA1,PPARG"
GO: Biological Process	positive regulation of macrophage cytokine production	3.77E-03	2.43E-02	2	6	"SEMA7A,CD74"
GO: Biological Process	antigen processing and presentation of endogenous peptide antigen via MHC class I	3.77E-03	2.43E-02	2	6	"HLA-A,TAP1"
GO: Biological Process	regulation of phosphatidylinositol biosynthetic process	3.77E-03	2.43E-02	2	6	"PDGFB,PDGFA"
GO: Biological Process	negative regulation of cell adhesion mediated by integrin	3.77E-03	2.43E-02	2	6	"SERPINE1,ACER2"
GO: Biological Process	mesangial cell differentiation	3.77E-03	2.43E-02	2	6	"ACTA2,PDGFB"
GO: Biological Process	response to heparin	3.77E-03	2.43E-02	2	6	"GPIHBP1,EGR1"
GO: Biological Process	positive regulation of type 2 immune response	3.77E-03	2.43E-02	2	6	"IL33,CD74"
GO: Biological Process	cellular pigment accumulation	3.77E-03	2.43E-02	2	6	"SHROOM3,SHROOM2"
GO: Biological Process	positive regulation of biosynthetic process	3.85E-03	2.47E-02	38	1495	"IL33,ABCA1,PPARG,DBP,HOXB9,JUNB,KLF9,HMGA1,BMP4,SERPINE1,IRF7,CIRBP,NLRC5,RGCC,CXCL10,NR1D2,TEF,NR2F2,F2R,MYC,EDN1,ZNF423,MDK,PDGFB,PDGFA,APOE,IGF2,MKL2,NPNT,CYR61,DDAH1,NR1D1,CTGF,IFI16,ZBTB16,CDH13,EGR1,STAT1"
GO: Biological Process	single organismal cell-cell adhesion	3.85E-03	2.47E-02	16	463	"ADA,OLR1,ITGB3,SELE,CD93,RGCC,AMIGO2,VCAM1,FBLIM1,NPNT,CYR61,CTGF,MGP,LGALS1,CDH13,SERPINE2"
GO: Biological Process	gland development	3.89E-03	2.49E-02	12	301	"TGM2,HOXB9,BMP4,XDH,APLN,ALDH1A2,LY6E,MDK,PDGFB,PDGFA,MMP2,SERPINE2"
GO: Biological Process	response to peptide hormone	3.92E-03	2.49E-02	15	422	"SERPINA3,PPARG,TIMP1,GJA1,JUNB,INHBB,UCP2,PDGFB,SOCS3,APOE,CXCL12,IGF2,CTGF,EGR1,STAT1"
GO: Biological Process	positive regulation of reactive oxygen species metabolic process	3.93E-03	2.49E-02	4	40	"CDKN1A,XDH,PDGFB,PLAU"
GO: Biological Process	regulation of insulin secretion involved in cellular response to glucose stimulus	3.93E-03	2.49E-02	4	40	"PIM3,HLA-DRB5,UCP2,NR1D1"
GO: Biological Process	nitric oxide mediated signal transduction	3.93E-03	2.49E-02	3	20	"RASD1,APOE,DDAH1"
GO: Biological Process	labyrinthine layer morphogenesis	3.93E-03	2.49E-02	3	20	"VCAM1,SOCS3,CYR61"
GO: Biological Process	negative regulation of blood vessel endothelial cell migration	3.93E-03	2.49E-02	3	20	"RGCC,ANGPT2,APOE"
GO: Biological Process	positive regulation of muscle tissue development	3.93E-03	2.49E-02	3	20	"GJA1,BMP4,MKL2"
GO: Biological Process	regulation of actin filament-based process	4.04E-03	2.56E-02	11	264	"GJA1,BST2,SYNPO,RGCC,CAPG,EDN1,PDGFA,CXCL12,SHROOM2,CTGF,ELN"
GO: Biological Process	positive regulation of lymphocyte mediated immunity	4.07E-03	2.57E-02	5	65	"B2M,HLA-E,HLA-A,RSAD2,TAP1"
GO: Biological Process	regulation of extent of cell growth	4.07E-03	2.57E-02	5	65	"APOE,CXCL12,SEMA7A,TNFRSF12A,FN1"
GO: Biological Process	embryonic placenta development	4.29E-03	2.70E-02	6	94	"JUNB,NR2F2,VCAM1,PDGFB,SOCS3,CYR61"
GO: Biological Process	T cell mediated cytotoxicity	4.30E-03	2.70E-02	4	41	"B2M,HLA-E,HLA-A,TAP1"
GO: Biological Process	positive regulation of cell adhesion	4.34E-03	2.72E-02	8	158	"TGM2,FBLN2,GPR56,NPNT,CYR61,LGALS1,CDH13,CD63"
GO: Biological Process	blood vessel endothelial cell migration	4.34E-03	2.72E-02	5	66	"RGCC,PRCP,ANGPT2,PDGFB,APOE"
GO: Biological Process	multicellular organismal reproductive process	4.38E-03	2.74E-02	23	780	"ACE,DBH,HSPA2,ADA,BCL2L1,JUNB,HMGA1,BMP4,XDH,PAFAH1B3,P2RY2,ABCG2,INHBB,APLN,NR2F2,EDN1,ANGPT2,CXCL12,CYP26B1,PLAU,ZBTB16,MMP2,SERPINE2"
GO: Biological Process	cellular response to growth factor stimulus	4.47E-03	2.79E-02	20	645	"PMEPA1,CDKN1A,JUNB,SULF2,ITGB3,BMP4,SERPINE1,XDH,VCAM1,MYC,EHD4,ANGPT2,PDGFB,PDGFA,APOE,COL4A2,NPNT,CTGF,EGR1,DDIT4"
GO: Biological Process	response to reactive oxygen species	4.50E-03	2.81E-02	8	159	"ZNF580,ADA,OLR1,UCP2,APOE,RHOB,STAT1,MMP2"
GO: Biological Process	positive regulation of macromolecule biosynthetic process	4.50E-03	2.81E-02	35	1359	"IL33,PPARG,DBP,HOXB9,JUNB,KLF9,HMGA1,BMP4,SERPINE1,IRF7,CIRBP,NLRC5,RGCC,CXCL10,NR1D2,TEF,NR2F2,F2R,MYC,EDN1,ZNF423,MDK,PDGFB,PDGFA,IGF2,MKL2,NPNT,CYR61,NR1D1,CTGF,IFI16,ZBTB16,CDH13,EGR1,STAT1"
GO: Biological Process	cytokine secretion	4.52E-03	2.81E-02	7	126	"IL33,ABCA1,CD274,RGCC,HLA-DRB5,F2R,CD14"
GO: Biological Process	lung development	4.52E-03	2.81E-02	9	194	"ACE,GPC3,ADA,BMP4,ALDH1A2,ERRFI1,PDGFA,CTGF,MGP"
GO: Biological Process	second-messenger-mediated signaling	4.52E-03	2.81E-02	9	194	"ADA,SELE,RASD1,CXCL10,EDN1,APOE,DDAH1,RCAN3,CDH13"
GO: Biological Process	response to cholesterol	4.53E-03	2.81E-02	3	21	"ABCA1,INHBB,APOE"
GO: Biological Process	positive regulation of leukocyte mediated immunity	4.63E-03	2.87E-02	5	67	"B2M,HLA-E,HLA-A,RSAD2,TAP1"
GO: Biological Process	fat cell differentiation	4.67E-03	2.89E-02	8	160	"PPARG,INHBB,FABP4,PSMB8,LRG1,NR1D1,JDP2,ZBTB16"
GO: Biological Process	metanephric nephron development	4.69E-03	2.89E-02	4	42	"BMP4,PDGFB,EGR1,STAT1"
GO: Biological Process	negative regulation of peptide hormone secretion	4.69E-03	2.89E-02	4	42	"PIM3,PPARG,INHBB,UCP2"
GO: Biological Process	positive regulation of cellular biosynthetic process	4.71E-03	2.90E-02	37	1463	"IL33,ABCA1,PPARG,DBP,HOXB9,JUNB,KLF9,HMGA1,BMP4,SERPINE1,IRF7,CIRBP,NLRC5,RGCC,CXCL10,NR1D2,TEF,NR2F2,F2R,MYC,EDN1,ZNF423,MDK,PDGFB,PDGFA,APOE,IGF2,MKL2,NPNT,CYR61,DDAH1,NR1D1,IFI16,ZBTB16,CDH13,EGR1,STAT1"
GO: Biological Process	positive regulation of leukocyte differentiation	4.72E-03	2.90E-02	7	127	"ADA,ITGB3,INPP5D,IL15,HLA-DQA1,HLA-DMA,CD74"
GO: Biological Process	response to estradiol	4.76E-03	2.92E-02	6	96	"NR2F2,ALDH1A2,PDGFB,PDGFA,CTGF,MMP2"
GO: Biological Process	regulation of cell division	4.84E-03	2.96E-02	9	196	"BMP4,RGCC,NEK6,MYC,EDN1,MDK,PDGFB,PDGFA,IGF2"
GO: Biological Process	cellular response to radiation	4.93E-03	3.01E-02	7	128	"CDKN1A,BCL2L1,MYC,RHOB,IFI16,EGR1,CRY2"
GO: Biological Process	respiratory tube development	5.00E-03	3.05E-02	9	197	"ACE,GPC3,ADA,BMP4,ALDH1A2,ERRFI1,PDGFA,CTGF,MGP"
GO: Biological Process	leukocyte apoptotic process	5.00E-03	3.05E-02	6	97	"ADA,BMP4,IRF7,MYC,CXCL12,CD74"
GO: Biological Process	interaction with host	5.00E-03	3.05E-02	6	97	"CYBB,IFITM3,BCL2L1,MYC,TAP1,IFIT1"
GO: Biological Process	T-helper 1 type immune response	5.10E-03	3.07E-02	4	43	"IL33,GADD45G,HLA-DRB5,HLA-DQB1"
GO: Biological Process	regulation of multicellular organismal metabolic process	5.10E-03	3.07E-02	4	43	"BMP4,RGCC,F2R,CTGF"
GO: Biological Process	positive regulation of nucleobase-containing compound metabolic process	5.16E-03	3.07E-02	35	1371	"IL33,ABCA1,PPARG,DBP,HOXB9,JUNB,KLF9,HMGA1,ZFP36,BMP4,SERPINE1,IRF7,NLRC5,RGCC,CXCL10,NR1D2,TEF,NR2F2,F2R,MYC,ZNF423,MDK,PDGFB,PDGFA,APOE,IGF2,MKL2,NPNT,CYR61,NR1D1,IFI16,ZBTB16,CDH13,EGR1,STAT1"
GO: Biological Process	multi-organism transport	5.19E-03	3.07E-02	3	22	"BST2,TAP1,IFIT1"
GO: Biological Process	response to sterol	5.19E-03	3.07E-02	3	22	"ABCA1,INHBB,APOE"
GO: Biological Process	embryonic placenta morphogenesis	5.19E-03	3.07E-02	3	22	"VCAM1,SOCS3,CYR61"
GO: Biological Process	transport of virus	5.19E-03	3.07E-02	3	22	"BST2,TAP1,IFIT1"
GO: Biological Process	intracellular transport of virus	5.19E-03	3.07E-02	3	22	"BST2,TAP1,IFIT1"
GO: Biological Process	multi-organism intracellular transport	5.19E-03	3.07E-02	3	22	"BST2,TAP1,IFIT1"
GO: Biological Process	positive regulation of cytokine production involved in immune response	5.19E-03	3.07E-02	3	22	"RSAD2,SEMA7A,CD74"
GO: Biological Process	mesonephros development	5.19E-03	3.07E-02	3	22	"GPC3,BMP4,ZBTB16"
GO: Biological Process	mesenchymal cell differentiation involved in renal system development	5.23E-03	3.07E-02	2	7	"BMP4,STAT1"
GO: Biological Process	mesenchymal cell differentiation involved in kidney development	5.23E-03	3.07E-02	2	7	"BMP4,STAT1"
GO: Biological Process	high-density lipoprotein particle assembly	5.23E-03	3.07E-02	2	7	"ABCA1,APOE"
GO: Biological Process	chorio-allantoic fusion	5.23E-03	3.07E-02	2	7	"VCAM1,CYR61"
GO: Biological Process	epithelial-mesenchymal cell signaling	5.23E-03	3.07E-02	2	7	"BMP4,PDGFA"
GO: Biological Process	regulation of mucus secretion	5.23E-03	3.07E-02	2	7	"ADA,P2RY2"
GO: Biological Process	negative regulation of natural killer cell mediated cytotoxicity	5.23E-03	3.07E-02	2	7	"HLA-A,TAP1"
GO: Biological Process	platelet-derived growth factor receptor-beta signaling pathway	5.23E-03	3.07E-02	2	7	"PDGFB,PDGFA"
GO: Biological Process	renal interstitial cell differentiation	5.23E-03	3.07E-02	2	7	"ACTA2,PDGFB"
GO: Biological Process	negative regulation of natural killer cell mediated immunity	5.23E-03	3.07E-02	2	7	"HLA-A,TAP1"
GO: Biological Process	peripheral nervous system axon regeneration	5.23E-03	3.07E-02	2	7	"APOE,MMP2"
GO: Biological Process	positive regulation of p38MAPK cascade	5.23E-03	3.07E-02	2	7	"GADD45G,XDH"
GO: Biological Process	chylomicron remnant clearance	5.23E-03	3.07E-02	2	7	"GPIHBP1,APOE"
GO: Biological Process	negative regulation of glycolytic process	5.23E-03	3.07E-02	2	7	"IER3,DDIT4"
GO: Biological Process	triglyceride-rich lipoprotein particle clearance	5.23E-03	3.07E-02	2	7	"GPIHBP1,APOE"
GO: Biological Process	smooth muscle contraction	5.26E-03	3.08E-02	6	98	"ACTA2,ADA,SULF2,F2R,EDN1,NPNT"
GO: Biological Process	positive regulation of immune effector process	5.36E-03	3.14E-02	7	130	"B2M,HLA-E,HLA-A,RSAD2,SEMA7A,TAP1,CD74"
GO: Biological Process	regulation of cell size	5.52E-03	3.22E-02	6	99	"EDN1,APOE,CXCL12,SEMA7A,TNFRSF12A,FN1"
GO: Biological Process	insulin secretion involved in cellular response to glucose stimulus	5.54E-03	3.22E-02	4	44	"PIM3,HLA-DRB5,UCP2,NR1D1"
GO: Biological Process	response to gamma radiation	5.54E-03	3.22E-02	4	44	"BCL2L1,CXCL10,MYC,EGR1"
GO: Biological Process	regulation of mesenchymal cell proliferation	5.54E-03	3.22E-02	4	44	"BMP4,MYC,PDGFA,STAT1"
GO: Biological Process	positive regulation of leukocyte mediated cytotoxicity	5.54E-03	3.22E-02	4	44	"B2M,HLA-E,HLA-A,TAP1"
GO: Biological Process	positive regulation of cytokine secretion	5.58E-03	3.24E-02	5	70	"IL33,CD274,RGCC,F2R,CD14"
GO: Biological Process	positive regulation of cell projection organization	5.68E-03	3.30E-02	9	201	"P2RY2,GPRC5B,APOE,CXCL12,CDC42EP4,SEMA7A,TNFRSF12A,FN1,SERPINE2"
GO: Biological Process	cellular glucose homeostasis	5.80E-03	3.36E-02	6	100	"PIM3,HLA-DRB5,VCAM1,UCP2,NR1D1,LGALS1"
GO: Biological Process	regulation of myeloid cell differentiation	5.82E-03	3.36E-02	8	166	"ITGB3,ZFP36,IRF7,INPP5D,MYC,TYROBP,ISG15,ZBTB16"
GO: Biological Process	multicellular organism reproduction	5.82E-03	3.36E-02	23	799	"ACE,DBH,HSPA2,ADA,BCL2L1,JUNB,HMGA1,BMP4,XDH,PAFAH1B3,P2RY2,ABCG2,INHBB,APLN,NR2F2,EDN1,ANGPT2,CXCL12,CYP26B1,PLAU,ZBTB16,MMP2,SERPINE2"
GO: Biological Process	negative regulation of intracellular signal transduction	5.84E-03	3.36E-02	12	317	"DHX58,BCL2L1,BMP4,XDH,MYC,UCHL1,APOE,CXCL12,STAT1,CD74,SERPINE2,DDIT4"
GO: Biological Process	response to peptide	5.84E-03	3.36E-02	15	441	"SERPINA3,PPARG,TIMP1,GJA1,JUNB,INHBB,UCP2,PDGFB,SOCS3,APOE,CXCL12,IGF2,CTGF,EGR1,STAT1"
GO: Biological Process	B cell apoptotic process	5.90E-03	3.39E-02	3	23	"ADA,MYC,CD74"
GO: Biological Process	negative regulation of leukocyte mediated immunity	5.90E-03	3.39E-02	3	23	"BST2,HLA-A,TAP1"
GO: Biological Process	axon development	5.90E-03	3.39E-02	18	572	"RTN4RL2,UNC5A,ITGB3,ITGA1,VIM,S100A6,UCHL1,APOE,CXCL12,COL4A1,COL4A2,SEMA7A,TYROBP,TNFRSF12A,FN1,RHOB,FLRT2,MMP2"
GO: Biological Process	response to growth factor	5.92E-03	3.39E-02	20	662	"PMEPA1,CDKN1A,JUNB,SULF2,ITGB3,BMP4,SERPINE1,XDH,VCAM1,MYC,EHD4,ANGPT2,PDGFB,PDGFA,APOE,COL4A2,NPNT,CTGF,EGR1,DDIT4"
GO: Biological Process	T cell costimulation	5.93E-03	3.39E-02	5	71	"CD274,HLA-DRB5,HLA-DQB1,HLA-DQA1,LGALS1"
GO: Biological Process	intrinsic apoptotic signaling pathway in response to DNA damage by p53 class mediator	6.01E-03	3.43E-02	4	45	"CDKN1A,IFI16,CD74,DDIT4"
GO: Biological Process	nephron tubule development	6.01E-03	3.43E-02	4	45	"GPC3,IRX3,AQP11,STAT1"
GO: Biological Process	regulation of lymphocyte differentiation	6.06E-03	3.45E-02	7	133	"ADA,BMP4,INPP5D,IL15,HLA-DQA1,HLA-DMA,CD74"
GO: Biological Process	lymphocyte costimulation	6.29E-03	3.58E-02	5	72	"CD274,HLA-DRB5,HLA-DQB1,HLA-DQA1,LGALS1"
GO: Biological Process	negative regulation of protein secretion	6.50E-03	3.69E-02	4	46	"IL33,RGCC,F2R,RSAD2"
GO: Biological Process	cell differentiation involved in kidney development	6.50E-03	3.69E-02	4	46	"ACTA2,BMP4,PDGFB,STAT1"
GO: Biological Process	negative regulation of nucleobase-containing compound metabolic process	6.65E-03	3.77E-02	29	1096	"PPARG,DAP,DAXX,SIK1,HOXD8,IFITM3,HMGA1,ZFP36,NR2F6,BMP4,IRF7,RASD1,NR1D2,FABP4,PER3,NR2F2,MYC,EDN1,ZNF423,PER1,GBP6,PDGFB,NR1D1,JDP2,IFI16,ZBTB16,EGR1,CRY2,STAT1"
GO: Biological Process	endothelium development	6.66E-03	3.77E-02	5	73	"GJA1,COL18A1,BMP4,XDH,NR2F2"
GO: Biological Process	negative regulation of transcription from RNA polymerase II promoter	6.67E-03	3.77E-02	19	624	"PPARG,SIK1,HOXD8,ZFP36,NR2F6,BMP4,IRF7,PER3,NR2F2,MYC,EDN1,PER1,GBP6,NR1D1,JDP2,IFI16,EGR1,CRY2,STAT1"
GO: Biological Process	"positive regulation of transcription, DNA-templated"	6.89E-03	3.84E-02	30	1148	"IL33,PPARG,DBP,HOXB9,JUNB,KLF9,HMGA1,BMP4,SERPINE1,IRF7,NLRC5,CXCL10,NR1D2,TEF,NR2F2,F2R,MYC,ZNF423,MDK,PDGFB,IGF2,MKL2,NPNT,CYR61,NR1D1,IFI16,ZBTB16,CDH13,EGR1,STAT1"
GO: Biological Process	platelet dense granule organization	6.89E-03	3.84E-02	2	8	"ABCA1,F2R"
GO: Biological Process	regulation of RIG-I signaling pathway	6.89E-03	3.84E-02	2	8	"DHX58,DDX60"
GO: Biological Process	metanephric glomerulus vasculature development	6.89E-03	3.84E-02	2	8	"PDGFB,EGR1"
GO: Biological Process	mucus secretion	6.89E-03	3.84E-02	2	8	"ADA,P2RY2"
GO: Biological Process	positive regulation of type I interferon-mediated signaling pathway	6.89E-03	3.84E-02	2	8	"IRF7,NLRC5"
GO: Biological Process	negative regulation of thymocyte apoptotic process	6.89E-03	3.84E-02	2	8	"ADA,BMP4"
GO: Biological Process	regulation of viral-induced cytoplasmic pattern recognition receptor signaling pathway	6.89E-03	3.84E-02	2	8	"DHX58,DDX60"
GO: Biological Process	positive regulation of cyclin-dependent protein serine/threonine kinase activity involved in G1/S transition of mitotic cell cycle	6.89E-03	3.84E-02	2	8	"RGCC,PIM1"
GO: Biological Process	negative regulation of insulin secretion involved in cellular response to glucose stimulus	6.89E-03	3.84E-02	2	8	"PIM3,UCP2"
GO: Biological Process	embryonic process involved in female pregnancy	6.89E-03	3.84E-02	2	8	"JUNB,ABCG2"
GO: Biological Process	muscle organ development	6.91E-03	3.84E-02	13	365	"GJA1,BMP4,CXCL10,NR1D2,NR2F2,MYC,LY6E,IGFBP3,MKL2,CYP26B1,ELN,MAFF,EGR1"
GO: Biological Process	pattern recognition receptor signaling pathway	6.92E-03	3.84E-02	8	171	"DHX58,IRF7,TRIL,RSAD2,DDX60,NR1D1,CD14,CTSS"
GO: Biological Process	positive regulation of hormone secretion	7.00E-03	3.88E-02	6	104	"INHBB,HLA-DRB5,APLN,EDN1,NMB,MYRIP"
GO: Biological Process	renal tubule development	7.01E-03	3.89E-02	4	47	"GPC3,IRX3,AQP11,STAT1"
GO: Biological Process	regulation of BMP signaling pathway	7.05E-03	3.90E-02	5	74	"GPC3,BMP4,BMPER,ZNF423,CYR61"
GO: Biological Process	T cell mediated immunity	7.05E-03	3.90E-02	5	74	"B2M,HLA-E,HLA-A,RSAD2,TAP1"
GO: Biological Process	actin cytoskeleton organization	7.34E-03	4.05E-02	16	496	"ACTN1,BST2,SYNPO,SHROOM3,RGCC,FAM101B,CAPG,EDN1,GAS7,PDGFB,PDGFA,CXCL12,SHROOM2,CTGF,ARHGDIB,ELN"
GO: Biological Process	multi-organism reproductive process	7.42E-03	4.08E-02	25	911	"ACE,TIMP1,DBH,HSPA2,ADA,BCL2L1,JUNB,KLF9,HMGA1,BMP4,PAFAH1B3,P2RY2,ABCG2,INHBB,NR2F2,EDN1,ANGPT2,UCP2,CXCL12,CYP26B1,MAFF,PLAU,ZBTB16,MMP2,SERPINE2"
GO: Biological Process	negative regulation of cellular catabolic process	7.46E-03	4.08E-02	5	75	"DAP,TIMP1,BCL2L1,IER3,DDIT4"
GO: Biological Process	response to interleukin-1	7.46E-03	4.08E-02	5	75	"SELE,EDN1,APOE,FN1,EGR1"
GO: Biological Process	positive regulation of epithelial cell migration	7.46E-03	4.08E-02	5	75	"ZNF580,ITGB3,BMP4,EDN1,PDGFB"
GO: Biological Process	positive regulation of transmembrane receptor protein serine/threonine kinase signaling pathway	7.46E-03	4.08E-02	5	75	"GPC3,BMP4,ZNF423,NPNT,CYR61"
GO: Biological Process	renal system process involved in regulation of systemic arterial blood pressure	7.48E-03	4.08E-02	3	25	"GJA1,F2R,PDGFB"
GO: Biological Process	osteoblast proliferation	7.48E-03	4.08E-02	3	25	"JUNB,ITGB3,CYR61"
GO: Biological Process	regulation of type 2 immune response	7.48E-03	4.08E-02	3	25	"IL33,RSAD2,CD74"
GO: Biological Process	B cell activation	7.50E-03	4.08E-02	9	210	"CDKN1A,ADA,BST2,INPP5D,HLA-DQB1,VCAM1,LGALS1,MNDA,CD74"
GO: Biological Process	positive regulation of cell cycle process	7.50E-03	4.08E-02	9	210	"CDKN1A,RGCC,PSMB8,PSMB9,EDN1,PDGFB,IGF2,CTGF,PIM1"
GO: Biological Process	labyrinthine layer development	7.56E-03	4.11E-02	4	48	"JUNB,VCAM1,SOCS3,CYR61"
GO: Biological Process	regulation of insulin secretion	7.65E-03	4.15E-02	8	174	"PIM3,KCNB1,INHBB,HLA-DRB5,MTNR1B,UCP2,NR1D1,MYRIP"
GO: Biological Process	innate immune response-activating signal transduction	7.65E-03	4.15E-02	8	174	"DHX58,IRF7,TRIL,RSAD2,DDX60,NR1D1,CD14,CTSS"
GO: Biological Process	regulation of cytokine secretion	7.66E-03	4.15E-02	6	106	"IL33,CD274,RGCC,HLA-DRB5,F2R,CD14"
GO: Biological Process	neuron projection morphogenesis	7.72E-03	4.18E-02	19	633	"GJA1,UNC5A,ITGB3,ITGA1,WEE1,VIM,GAS7,S100A6,UCHL1,APOE,CXCL12,COL4A1,COL4A2,SEMA7A,TYROBP,TNFRSF12A,FN1,RHOB,FLRT2"
GO: Biological Process	positive regulation of hydrolase activity	7.73E-03	4.18E-02	17	543	"PPARG,DAP,CHN2,ITGA1,SELE,XDH,F2R,MYC,GPIHBP1,ACER2,ERRFI1,NPNT,CYR61,CTGF,FN1,IFI16,STAT1"
GO: Biological Process	single-organism biosynthetic process	7.90E-03	4.26E-02	36	1461	"CMPK2,ST8SIA6,THRSP,ABCA1,GPC3,ODC1,SIK1,OAS2,OAS1,BGN,ADA,BMP4,AK1,INPP5D,RGCC,CHST2,F2R,ALDH1A2,MYC,EDN1,ACER2,LTC4S,UCK2,PDGFB,CH25H,PDGFA,APOE,FITM2,PNPLA2,IGF2,CYR61,NR1D1,CTGF,FPGS,GSTA4,CD74"
GO: Biological Process	regulation of T cell differentiation	8.01E-03	4.31E-02	6	107	"ADA,BMP4,IL15,HLA-DQA1,HLA-DMA,CD74"
GO: Biological Process	response to hydrogen peroxide	8.01E-03	4.31E-02	6	107	"ZNF580,ADA,OLR1,RHOB,STAT1,MMP2"
GO: Biological Process	positive regulation of RNA metabolic process	8.05E-03	4.33E-02	31	1211	"IL33,PPARG,DBP,HOXB9,JUNB,KLF9,HMGA1,ZFP36,BMP4,SERPINE1,IRF7,NLRC5,CXCL10,NR1D2,TEF,NR2F2,F2R,MYC,ZNF423,MDK,PDGFB,IGF2,MKL2,NPNT,CYR61,NR1D1,IFI16,ZBTB16,CDH13,EGR1,STAT1"
GO: Biological Process	macrophage activation	8.13E-03	4.36E-02	4	49	"IL33,CD93,TYROBP,CD74"
GO: Biological Process	regulation of system process	8.16E-03	4.37E-02	14	415	"ACE,GJA1,DBH,ADA,P2RY2,INHBB,APLN,F2R,EDN1,PDGFB,NPNT,CTGF,CTSS,MMP2"
GO: Biological Process	cellular homeostasis	8.23E-03	4.41E-02	20	683	"TGM2,PIM3,GJA1,P2RY2,ABCG2,CXCL10,HLA-DRB5,F2R,VCAM1,MYC,EDN1,UCP2,APOE,CXCL12,FITM2,NR1D1,LGALS1,QSOX1,NMB,AQP11"
GO: Biological Process	negative regulation of nitrogen compound metabolic process	8.25E-03	4.41E-02	29	1114	"PPARG,DAP,DAXX,SIK1,HOXD8,IFITM3,HMGA1,ZFP36,NR2F6,BMP4,IRF7,RASD1,NR1D2,FABP4,PER3,NR2F2,MYC,EDN1,ZNF423,PER1,GBP6,PDGFB,NR1D1,JDP2,IFI16,ZBTB16,EGR1,CRY2,STAT1"
GO: Biological Process	fatty acid transport	8.32E-03	4.44E-02	5	77	"ACE,PPARG,PLIN2,P2RY2,NMB"
GO: Biological Process	endocytosis	8.34E-03	4.44E-02	16	503	"CLEC10A,TGM2,ABCA1,GPC3,BCL2L1,OLR1,SELE,SERPINE1,CD93,EHD4,LRP3,APOE,CD14,LGALS3BP,CDH13,CD63"
GO: Biological Process	negative regulation of cellular carbohydrate metabolic process	8.35E-03	4.44E-02	3	26	"SIK1,IER3,DDIT4"
GO: Biological Process	response to mineralocorticoid	8.35E-03	4.44E-02	3	26	"CDKN1A,JUNB,CTGF"
GO: Biological Process	branching involved in salivary gland morphogenesis	8.35E-03	4.44E-02	3	26	"TGM2,PDGFB,PDGFA"
GO: Biological Process	regulation of developmental growth	8.56E-03	4.55E-02	7	142	"GJA1,BMP4,APOE,CXCL12,SEMA7A,TNFRSF12A,FN1"
GO: Biological Process	lipid localization	8.63E-03	4.55E-02	11	293	"ACE,ABCA1,PPARG,PLIN2,ITGB3,P2RY2,GPIHBP1,APOE,FITM2,PNPLA2,NMB"
GO: Biological Process	long-chain fatty acid transport	8.72E-03	4.55E-02	4	50	"ACE,PPARG,PLIN2,NMB"
GO: Biological Process	positive regulation of cell killing	8.72E-03	4.55E-02	4	50	"B2M,HLA-E,HLA-A,TAP1"
GO: Biological Process	cellular response to interleukin-1	8.72E-03	4.55E-02	4	50	"EDN1,APOE,FN1,EGR1"
GO: Biological Process	triglyceride metabolic process	8.74E-03	4.55E-02	6	109	"THRSP,SIK1,FABP4,APOE,FITM2,PNPLA2"
GO: Biological Process	histamine secretion	8.77E-03	4.55E-02	2	9	"ADA,EDN1"
GO: Biological Process	pattern specification involved in kidney development	8.77E-03	4.55E-02	2	9	"IRX3,BMP4"
GO: Biological Process	negative regulation of vasoconstriction	8.77E-03	4.55E-02	2	9	"APLN,MMP2"
GO: Biological Process	regulation of phospholipid biosynthetic process	8.77E-03	4.55E-02	2	9	"PDGFB,PDGFA"
GO: Biological Process	positive regulation of myeloid leukocyte cytokine production involved in immune response	8.77E-03	4.55E-02	2	9	"SEMA7A,CD74"
GO: Biological Process	mature B cell differentiation involved in immune response	8.77E-03	4.55E-02	2	9	"ADA,LGALS1"
GO: Biological Process	regulation of cyclin-dependent protein serine/threonine kinase activity involved in G1/S transition of mitotic cell cycle	8.77E-03	4.55E-02	2	9	"RGCC,PIM1"
GO: Biological Process	regulation of interleukin-10 secretion	8.77E-03	4.55E-02	2	9	"CD274,HLA-DRB5"
GO: Biological Process	nephric duct morphogenesis	8.77E-03	4.55E-02	2	9	"GPC3,BMP4"
GO: Biological Process	regulation of plasminogen activation	8.77E-03	4.55E-02	2	9	"SERPINE1,SERPINE2"
GO: Biological Process	renal system pattern specification	8.77E-03	4.55E-02	2	9	"IRX3,BMP4"
GO: Biological Process	regulation of p38MAPK cascade	8.77E-03	4.55E-02	2	9	"GADD45G,XDH"
GO: Biological Process	low-density lipoprotein particle receptor biosynthetic process	8.77E-03	4.55E-02	2	9	"PPARG,ITGB3"
GO: Biological Process	mesenchyme development	9.00E-03	4.67E-02	8	179	"GJA1,BMP4,RGCC,FAM101B,ALDH1A2,MYC,EDN1,STAT1"
GO: Biological Process	negative regulation of catabolic process	9.12E-03	4.72E-02	6	110	"DAP,TIMP1,BCL2L1,IER3,SERPINE2,DDIT4"
GO: Biological Process	response to vitamin	9.24E-03	4.78E-02	5	79	"PPARG,ADA,CXCL10,IL15,ALDH1A2"
GO: Biological Process	axon extension	9.24E-03	4.78E-02	5	79	"APOE,CXCL12,SEMA7A,TNFRSF12A,FN1"
GO: Biological Process	regulation of endothelial cell apoptotic process	9.28E-03	4.78E-02	3	27	"COL18A1,SERPINE1,RGCC"
GO: Biological Process	regulation of glycolytic process	9.28E-03	4.78E-02	3	27	"IER3,MYC,DDIT4"
GO: Biological Process	negative regulation of intrinsic apoptotic signaling pathway in response to DNA damage	9.28E-03	4.78E-02	3	27	"BCL2L1,CXCL12,CD74"
GO: Biological Process	embryo development ending in birth or egg hatching	9.32E-03	4.79E-02	19	645	"GJA1,HOXB9,ADA,BCL2L1,JUNB,SULF2,BMP4,SHROOM3,ABCG2,NR2F2,ALDH1A2,VCAM1,EDN1,LY6E,PDGFB,SOCS3,MKL2,CYR61,MAFF"
GO: Biological Process	exocrine system development	9.35E-03	4.80E-02	4	51	"TGM2,PDGFB,PDGFA,IGF2"
GO: Biological Process	lipid biosynthetic process	9.59E-03	4.91E-02	18	601	"ST8SIA6,THRSP,SIK1,INPP5D,ALDH1A2,EDN1,ACER2,LTC4S,PDGFB,CH25H,PDGFA,APOE,FITM2,PNPLA2,IGF2,CYR61,NR1D1,CD74"
GO: Biological Process	positive regulation of catabolic process	9.59E-03	4.91E-02	8	181	"IL33,GPC3,GJA1,ZFP36,IER3,MYC,APOE,PNPLA2"
GO: Biological Process	sensory organ development	9.60E-03	4.91E-02	16	511	"GJA1,ROM1,BMP4,INHBB,HLA-E,VIM,BMPER,ALDH1A2,HLA-A,HLA-DMA,MYC,EDN1,PDGFA,SHROOM2,CYP26B1,IFI16"
GO: Biological Process	multicellular organismal catabolic process	9.73E-03	4.97E-02	5	80	"ACE,COL18A1,COL4A1,COL4A2,MMP2"
GO: Biological Process	T cell differentiation in thymus	9.73E-03	4.97E-02	5	80	"B2M,ADA,BMP4,HLA-DMA,CD74"
GO: Biological Process	regulation of leukocyte mediated cytotoxicity	1.00E-02	5.09E-02	4	52	"B2M,HLA-E,HLA-A,TAP1"
GO: Biological Process	protein secretion	1.00E-02	5.09E-02	9	220	"IL33,ABCA1,CD274,RGCC,CXCL10,HLA-DRB5,F2R,RSAD2,CD14"
GO: Biological Process	respiratory system development	1.00E-02	5.09E-02	9	220	"ACE,GPC3,ADA,BMP4,ALDH1A2,ERRFI1,PDGFA,CTGF,MGP"
GO: Biological Process	female pregnancy	1.02E-02	5.18E-02	8	183	"TIMP1,JUNB,KLF9,ABCG2,NR2F2,ANGPT2,UCP2,MMP2"
GO: Biological Process	neuron projection extension	1.02E-02	5.18E-02	5	81	"APOE,CXCL12,SEMA7A,TNFRSF12A,FN1"
GO: Biological Process	endocrine process	1.02E-02	5.18E-02	5	81	"ACE,INHBB,APLN,F2R,EDN1"
GO: Biological Process	positive regulation of epithelial cell proliferation	1.03E-02	5.18E-02	7	147	"ZNF580,ITGB3,BMP4,MYC,PDGFB,CXCL12,CDH13"
GO: Biological Process	neutral amino acid transport	1.03E-02	5.18E-02	3	28	"SLC6A6,SLC1A5,SLC3A2"
GO: Biological Process	positive regulation of smooth muscle cell migration	1.03E-02	5.18E-02	3	28	"P2RY2,PDGFB,PLAU"
GO: Biological Process	regulation of macrophage derived foam cell differentiation	1.03E-02	5.18E-02	3	28	"ABCA1,PPARG,ITGB3"
GO: Biological Process	copulation	1.03E-02	5.18E-02	3	28	"ADA,P2RY2,SERPINE2"
GO: Biological Process	viral life cycle	1.05E-02	5.29E-02	10	261	"OAS1,IFITM3,BST2,ISG20,RSAD2,TAP1,IFIT1,IFI16,ISG15,OASL"
GO: Biological Process	organ morphogenesis	1.06E-02	5.30E-02	24	890	"GPC3,GJA1,COL18A1,HOXD8,IRX3,ROM1,BMP4,ALDH1A2,MYC,EDN1,ERRFI1,LY6E,PDGFA,IGF2,MKL2,CYR61,SHROOM2,CYP26B1,CTGF,MGP,ELN,PLAU,STAT1,MMP2"
GO: Biological Process	Rho protein signal transduction	1.06E-02	5.31E-02	9	222	"ABCA1,GPR56,F2R,ERRFI1,APOE,CDC42EP4,ARHGDIB,RHOB,CDH13"
GO: Biological Process	peptidyl-tyrosine phosphorylation	1.07E-02	5.31E-02	11	302	"ITGB3,WEE1,IL15,F2R,EHD4,ERRFI1,CRIM1,PDGFB,PDGFA,IGF2,CD74"
GO: Biological Process	smooth muscle cell differentiation	1.07E-02	5.31E-02	4	53	"BMP4,PDGFB,MKL2,NPNT"
GO: Biological Process	cell morphogenesis involved in differentiation	1.07E-02	5.31E-02	22	795	"GJA1,COL18A1,UNC5A,ITGB3,ITGA1,BMP4,RGCC,FAM101B,VIM,S100A6,UCHL1,APOE,CXCL12,COL4A1,COL4A2,SEMA7A,TYROBP,TNFRSF12A,FN1,RHOB,FLRT2,STAT1"
GO: Biological Process	B cell proliferation	1.08E-02	5.31E-02	5	82	"CDKN1A,ADA,INPP5D,MNDA,CD74"
GO: Biological Process	regulation of lipid transport	1.08E-02	5.31E-02	5	82	"ABCA1,PPARG,ITGB3,P2RY2,APOE"
GO: Biological Process	bone remodeling	1.08E-02	5.31E-02	5	82	"GJA1,ITGB3,XDH,INPP5D,CTSS"
GO: Biological Process	negative regulation of cell killing	1.08E-02	5.31E-02	2	10	"HLA-A,TAP1"
GO: Biological Process	mitotic cell cycle arrest	1.08E-02	5.31E-02	2	10	"CDKN1A,RGCC"
GO: Biological Process	p38MAPK cascade	1.08E-02	5.31E-02	2	10	"GADD45G,XDH"
GO: Biological Process	negative regulation of leukocyte mediated cytotoxicity	1.08E-02	5.31E-02	2	10	"HLA-A,TAP1"
GO: Biological Process	regulation of germinal center formation	1.08E-02	5.31E-02	2	10	"ADA,HLA-DMA"
GO: Biological Process	lipid particle organization	1.08E-02	5.31E-02	2	10	"FITM2,PNPLA2"
GO: Biological Process	regulation of macrophage cytokine production	1.08E-02	5.31E-02	2	10	"SEMA7A,CD74"
GO: Biological Process	positive regulation of antigen processing and presentation	1.08E-02	5.31E-02	2	10	"HLA-DQB1,CD74"
GO: Biological Process	protein heterotrimerization	1.08E-02	5.31E-02	2	10	"C1QTNF1,C1QTNF6"
GO: Biological Process	positive regulation of osteoblast proliferation	1.08E-02	5.31E-02	2	10	"ITGB3,CYR61"
GO: Biological Process	establishment of viral latency	1.08E-02	5.31E-02	2	10	"HMGA1,IRF7"
GO: Biological Process	regulation of penile erection	1.08E-02	5.31E-02	2	10	"ADA,P2RY2"
GO: Biological Process	positive regulation of monocyte chemotaxis	1.08E-02	5.31E-02	2	10	"SERPINE1,CXCL12"
GO: Biological Process	interleukin-10 secretion	1.08E-02	5.31E-02	2	10	"CD274,HLA-DRB5"
GO: Biological Process	regulation of angiogenesis	1.09E-02	5.31E-02	8	185	"SERPINE1,RGCC,CXCL10,ANGPT2,COL4A2,DDAH1,RHOB,STAT1"
GO: Biological Process	regulation of cellular component size	1.09E-02	5.31E-02	9	223	"CAPG,EDN1,APOE,CXCL12,SEMA7A,SHROOM2,TNFRSF12A,FN1,ELN"
GO: Biological Process	organic anion transport	1.10E-02	5.35E-02	13	387	"ACE,ABCA1,PPARG,SLC10A6,SLC6A6,GJA1,PLIN2,P2RY2,SLC1A5,SLC3A2,MYC,APOE,NMB"
GO: Biological Process	positive regulation of RNA biosynthetic process	1.10E-02	5.36E-02	30	1189	"IL33,PPARG,DBP,HOXB9,JUNB,KLF9,HMGA1,BMP4,SERPINE1,IRF7,NLRC5,CXCL10,NR1D2,TEF,NR2F2,F2R,MYC,ZNF423,MDK,PDGFB,IGF2,MKL2,NPNT,CYR61,NR1D1,IFI16,ZBTB16,CDH13,EGR1,STAT1"
GO: Biological Process	regulation of apoptotic signaling pathway	1.10E-02	5.38E-02	12	345	"SERINC3,DAXX,DBH,BCL2L1,SERPINE1,IER3,INHBB,MYC,CXCL12,TNFRSF12A,ITPRIP,CD74"
GO: Biological Process	peptidyl-tyrosine modification	1.12E-02	5.44E-02	11	304	"ITGB3,WEE1,IL15,F2R,EHD4,ERRFI1,CRIM1,PDGFB,PDGFA,IGF2,CD74"
GO: Biological Process	regulation of striated muscle tissue development	1.12E-02	5.45E-02	6	115	"GJA1,BMP4,NR1D2,IGFBP3,MKL2,CYP26B1"
GO: Biological Process	positive regulation of production of molecular mediator of immune response	1.13E-02	5.46E-02	3	29	"RSAD2,SEMA7A,CD74"
GO: Biological Process	negative regulation of reproductive process	1.13E-02	5.46E-02	3	29	"TIMP1,ADA,BMP4"
GO: Biological Process	cellular response to vascular endothelial growth factor stimulus	1.13E-02	5.46E-02	3	29	"XDH,VCAM1,PDGFB"
GO: Biological Process	RNA stabilization	1.13E-02	5.46E-02	3	29	"ZFP36,CIRBP,IGF2BP1"
GO: Biological Process	mRNA stabilization	1.13E-02	5.46E-02	3	29	"ZFP36,CIRBP,IGF2BP1"
GO: Biological Process	regulation of positive chemotaxis	1.13E-02	5.46E-02	3	29	"ANGPT2,CXCL12,CDH13"
GO: Biological Process	peptide cross-linking	1.13E-02	5.46E-02	3	29	"TGM2,BGN,FN1"
GO: Biological Process	regulation of lymphocyte apoptotic process	1.14E-02	5.48E-02	4	54	"ADA,BMP4,MYC,CD74"
GO: Biological Process	regulation of cartilage development	1.14E-02	5.48E-02	4	54	"BMP4,CYR61,CTGF,ZBTB16"
GO: Biological Process	in utero embryonic development	1.14E-02	5.48E-02	13	389	"GJA1,ADA,BCL2L1,JUNB,NR2F2,VCAM1,EDN1,LY6E,PDGFB,SOCS3,MKL2,CYR61,MAFF"
GO: Biological Process	epithelial cell differentiation	1.18E-02	5.66E-02	16	523	"PPARG,GJA1,ACTA2,COL18A1,BMP4,XDH,SHROOM3,VIM,NR2F2,ERRFI1,PDGFB,COL4A1,CYP26B1,MAFF,STAT1,CD63"
GO: Biological Process	osteoclast differentiation	1.19E-02	5.69E-02	5	84	"GPC3,JUNB,ITGB3,INPP5D,TYROBP"
GO: Biological Process	acylglycerol metabolic process	1.21E-02	5.79E-02	6	117	"THRSP,SIK1,FABP4,APOE,FITM2,PNPLA2"
GO: Biological Process	regulation of muscle tissue development	1.21E-02	5.79E-02	6	117	"GJA1,BMP4,NR1D2,IGFBP3,MKL2,CYP26B1"
GO: Biological Process	regulation of mitosis	1.21E-02	5.79E-02	6	117	"BMP4,RGCC,NEK6,EDN1,PDGFB,IGF2"
GO: Biological Process	regulation of nuclear division	1.21E-02	5.79E-02	6	117	"BMP4,RGCC,NEK6,EDN1,PDGFB,IGF2"
GO: Biological Process	regulation of muscle organ development	1.21E-02	5.79E-02	6	117	"GJA1,BMP4,NR1D2,IGFBP3,MKL2,CYP26B1"
GO: Biological Process	mesenchymal cell differentiation	1.22E-02	5.80E-02	7	152	"GJA1,BMP4,RGCC,FAM101B,ALDH1A2,EDN1,STAT1"
GO: Biological Process	signal release	1.23E-02	5.86E-02	13	393	"PIM3,PPARG,KCNB1,INHBB,HLA-DRB5,APLN,MTNR1B,EDN1,LY6E,UCP2,NR1D1,NMB,MYRIP"
GO: Biological Process	negative regulation of developmental process	1.24E-02	5.89E-02	19	664	"ABCA1,PPARG,GJA1,IRX3,ITGB3,ZFP36,BMP4,SERPINE1,XDH,INPP5D,RGCC,CXCL10,MYC,ANGPT2,COL4A2,JDP2,ZBTB16,STAT1,CD74"
GO: Biological Process	regulation of protein autophosphorylation	1.24E-02	5.90E-02	3	30	"ERRFI1,PDGFB,PDGFA"
GO: Biological Process	endothelial cell apoptotic process	1.24E-02	5.90E-02	3	30	"COL18A1,SERPINE1,RGCC"
GO: Biological Process	neutral lipid metabolic process	1.26E-02	5.97E-02	6	118	"THRSP,SIK1,FABP4,APOE,FITM2,PNPLA2"
GO: Biological Process	regulation of hydrolase activity	1.28E-02	6.06E-02	27	1053	"SERPINA3,PPARG,DAP,GPC3,TIMP1,CHN2,OAS1,BCL2L1,BST2,ITGA1,SELE,SERPINE1,XDH,F2R,MYC,GPIHBP1,ACER2,ERRFI1,NPNT,CYR61,CTGF,FN1,IFIT1,IFI16,CRY2,STAT1,SERPINE2"
GO: Biological Process	kidney morphogenesis	1.29E-02	6.08E-02	4	56	"GPC3,IRX3,BMP4,STAT1"
GO: Biological Process	regulation of smooth muscle contraction	1.29E-02	6.08E-02	4	56	"ADA,F2R,EDN1,NPNT"
GO: Biological Process	positive regulation of homeostatic process	1.30E-02	6.08E-02	5	86	"ITGB3,CXCL10,APLN,F2R,NR1D1"
GO: Biological Process	regulation of axonogenesis	1.31E-02	6.08E-02	6	119	"VIM,APOE,CXCL12,SEMA7A,TNFRSF12A,FN1"
GO: Biological Process	positive regulation of endothelial cell apoptotic process	1.31E-02	6.08E-02	2	11	"COL18A1,RGCC"
GO: Biological Process	regulation of skeletal muscle cell differentiation	1.31E-02	6.08E-02	2	11	"NR1D2,CYP26B1"
GO: Biological Process	histamine transport	1.31E-02	6.08E-02	2	11	"ADA,EDN1"
GO: Biological Process	RIG-I signaling pathway	1.31E-02	6.08E-02	2	11	"DHX58,DDX60"
GO: Biological Process	leukocyte tethering or rolling	1.31E-02	6.08E-02	2	11	"SELE,VCAM1"
GO: Biological Process	type B pancreatic cell proliferation	1.31E-02	6.08E-02	2	11	"IGFBP3,NR1D1"
GO: Biological Process	cellular response to thyroid hormone stimulus	1.31E-02	6.08E-02	2	11	"KLF9,CTSS"
GO: Biological Process	macrophage cytokine production	1.31E-02	6.08E-02	2	11	"SEMA7A,CD74"
GO: Biological Process	norepinephrine metabolic process	1.31E-02	6.08E-02	2	11	"DBH,LY6E"
GO: Biological Process	apical protein localization	1.31E-02	6.08E-02	2	11	"SHROOM3,SHROOM2"
GO: Biological Process	phospholipid efflux	1.31E-02	6.08E-02	2	11	"ABCA1,APOE"
GO: Biological Process	viral latency	1.31E-02	6.08E-02	2	11	"HMGA1,IRF7"
GO: Biological Process	positive regulation of Rho protein signal transduction	1.31E-02	6.08E-02	2	11	"GPR56,F2R"
GO: Biological Process	antigen processing and presentation via MHC class Ib	1.31E-02	6.08E-02	2	11	"B2M,HLA-E"
GO: Biological Process	positive regulation of kidney development	1.31E-02	6.08E-02	2	11	"BMP4,MYC"
GO: Biological Process	positive regulation of steroid metabolic process	1.36E-02	6.27E-02	3	31	"APOE,IGF2,NR1D1"
GO: Biological Process	monocyte chemotaxis	1.36E-02	6.27E-02	3	31	"SERPINE1,PDGFB,CXCL12"
GO: Biological Process	chaperone-mediated protein folding	1.36E-02	6.27E-02	3	31	"FKBP5,HLA-DMA,CD74"
GO: Biological Process	negative regulation of lymphocyte apoptotic process	1.36E-02	6.27E-02	3	31	"ADA,BMP4,CD74"
GO: Biological Process	response to tumor necrosis factor	1.36E-02	6.27E-02	6	120	"SELE,VCAM1,EDN1,NPNT,CD14,STAT1"
GO: Biological Process	regulation of striated muscle cell differentiation	1.37E-02	6.29E-02	5	87	"SIK1,BMP4,EDN1,IGFBP3,CYP26B1"
GO: Biological Process	cellular carbohydrate metabolic process	1.37E-02	6.31E-02	10	272	"SIK1,IER3,MYC,ACER2,PFKFB3,C1QTNF1,IGF2,IGFBP3,NR1D1,DDIT4"
GO: Biological Process	tube morphogenesis	1.39E-02	6.37E-02	12	356	"TGM2,GPC3,GJA1,IRX3,BMP4,SHROOM3,ALDH1A2,MYC,EDN1,CXCL12,NPNT,MGP"
GO: Biological Process	regulation of MAP kinase activity	1.41E-02	6.45E-02	10	273	"DAXX,ITGA1,BMP4,EDN1,MAP3K6,UCHL1,PDGFB,PDGFA,APOE,CD74"
GO: Biological Process	body fluid secretion	1.43E-02	6.51E-02	5	88	"ADA,XDH,P2RY2,APLN,EDN1"
GO: Biological Process	cellular lipid metabolic process	1.44E-02	6.51E-02	24	915	"ST8SIA6,THRSP,ABCA1,PPARG,GPC3,SIK1,PLIN2,INPP5D,FABP4,ALDH1A2,EDN1,ACER2,CERK,LTC4S,PDGFB,CH25H,PDGFA,APOE,FITM2,PNPLA2,CYR61,CYP26B1,CTGF,CD74"
GO: Biological Process	regulation of cell killing	1.45E-02	6.51E-02	4	58	"B2M,HLA-E,HLA-A,TAP1"
GO: Biological Process	stress fiber assembly	1.45E-02	6.51E-02	4	58	"SYNPO,RGCC,CTGF,ELN"
GO: Biological Process	regulation of myotube differentiation	1.45E-02	6.51E-02	4	58	"SIK1,BMP4,IGFBP3,CYP26B1"
GO: Biological Process	apoptotic signaling pathway	1.46E-02	6.51E-02	17	582	"IL33,DAP,SERINC3,DAXX,DBH,CDKN1A,BCL2L1,SERPINE1,IER3,INHBB,MYC,CXCL12,TNFRSF12A,ITPRIP,IFI16,CD74,DDIT4"
GO: Biological Process	regulation of endocytosis	1.48E-02	6.51E-02	7	158	"GPC3,SELE,SERPINE1,EHD4,CD14,CDH13,CD63"
GO: Biological Process	type 2 immune response	1.48E-02	6.51E-02	3	32	"IL33,RSAD2,CD74"
GO: Biological Process	foam cell differentiation	1.48E-02	6.51E-02	3	32	"ABCA1,PPARG,ITGB3"
GO: Biological Process	proximal/distal pattern formation	1.48E-02	6.51E-02	3	32	"IRX3,ALDH1A2,CYP26B1"
GO: Biological Process	axon regeneration	1.48E-02	6.51E-02	3	32	"RTN4RL2,APOE,MMP2"
GO: Biological Process	cellular extravasation	1.48E-02	6.51E-02	3	32	"ITGA1,SELE,VCAM1"
GO: Biological Process	embryonic hindlimb morphogenesis	1.48E-02	6.51E-02	3	32	"GPC3,BMP4,ZBTB16"
GO: Biological Process	regulation of lipoprotein lipase activity	1.48E-02	6.51E-02	3	32	"ITGA1,GPIHBP1,CRY2"
GO: Biological Process	macrophage derived foam cell differentiation	1.48E-02	6.51E-02	3	32	"ABCA1,PPARG,ITGB3"
GO: Biological Process	regulation of peptidyl-tyrosine phosphorylation	1.50E-02	6.51E-02	8	196	"ITGB3,IL15,EHD4,ERRFI1,PDGFB,PDGFA,IGF2,CD74"
GO: Biological Process	response to amino acid	1.50E-02	6.51E-02	5	89	"BCL2L1,EDN1,COL4A1,CTGF,MMP2"
GO: Biological Process	extracellular matrix disassembly	1.50E-02	6.51E-02	5	89	"TIMP1,COL18A1,COL4A1,COL4A2,MMP2"
GO: Biological Process	regulation of neurogenesis	1.50E-02	6.51E-02	16	538	"ACE,PPARG,GPR56,IRX3,BMP4,P2RY2,VIM,GPRC5B,APOE,CXCL12,SEMA7A,TNFRSF12A,FN1,LGALS1,FLRT2,SERPINE2"
GO: Biological Process	myeloid leukocyte migration	1.52E-02	6.51E-02	6	123	"ITGA1,SERPINE1,EDN1,PDGFB,CXCL12,CD74"
GO: Biological Process	bone resorption	1.54E-02	6.51E-02	4	59	"ITGB3,XDH,INPP5D,CTSS"
GO: Biological Process	positive thymic T cell selection	1.56E-02	6.51E-02	2	12	"HLA-DMA,CD74"
GO: Biological Process	cell-cell adhesion mediated by integrin	1.56E-02	6.51E-02	2	12	"ADA,NPNT"
GO: Biological Process	nephric duct development	1.56E-02	6.51E-02	2	12	"GPC3,BMP4"
GO: Biological Process	negative regulation of B cell apoptotic process	1.56E-02	6.51E-02	2	12	"ADA,CD74"
GO: Biological Process	regulation of antigen processing and presentation	1.56E-02	6.51E-02	2	12	"HLA-DQB1,CD74"
GO: Biological Process	positive regulation of cholesterol efflux	1.56E-02	6.51E-02	2	12	"ABCA1,APOE"
GO: Biological Process	entrainment of circadian clock	1.56E-02	6.51E-02	2	12	"NR2F6,PER1"
GO: Biological Process	mature B cell differentiation	1.56E-02	6.51E-02	2	12	"ADA,LGALS1"
GO: Biological Process	phosphatidylinositol 3-kinase signaling	1.56E-02	6.51E-02	5	90	"F2R,EDN1,PDGFB,PDGFA,SERPINE2"
GO: Biological Process	epithelial cell development	1.58E-02	6.51E-02	7	160	"GJA1,ACTA2,COL18A1,BMP4,SHROOM3,PDGFB,STAT1"
GO: Biological Process	BMP signaling pathway	1.58E-02	6.51E-02	6	124	"GPC3,BMP4,BMPER,ZNF423,CYR61,EGR1"
GO: Biological Process	regulation of sensory perception of pain	1.61E-02	6.51E-02	3	33	"F2R,EDN1,CTSS"
GO: Biological Process	hyaluronan metabolic process	1.61E-02	6.51E-02	3	33	"IL15,PDGFB,PIM1"
GO: Biological Process	negative regulation of smooth muscle cell proliferation	1.61E-02	6.51E-02	3	33	"PPARG,IL15,IGFBP3"
GO: Biological Process	regulation of sensory perception	1.61E-02	6.51E-02	3	33	"F2R,EDN1,CTSS"
GO: Biological Process	deoxyadenosine catabolic process	1.62E-02	6.51E-02	1	1	ADA
GO: Biological Process	extrathymic T cell selection	1.62E-02	6.51E-02	1	1	IL15
GO: Biological Process	xanthine biosynthetic process	1.62E-02	6.51E-02	1	1	ADA
GO: Biological Process	extrathymic T cell differentiation	1.62E-02	6.51E-02	1	1	IL15
GO: Biological Process	sodium-dependent organic anion transport	1.62E-02	6.51E-02	1	1	SLC10A6
GO: Biological Process	renal system segmentation	1.62E-02	6.51E-02	1	1	BMP4
GO: Biological Process	germinal center B cell differentiation	1.62E-02	6.51E-02	1	1	ADA
GO: Biological Process	negative regulation of macrophage fusion	1.62E-02	6.51E-02	1	1	STAT1
GO: Biological Process	ureter epithelial cell differentiation	1.62E-02	6.51E-02	1	1	BMP4
GO: Biological Process	negative regulation of vascular wound healing	1.62E-02	6.51E-02	1	1	SERPINE1
GO: Biological Process	peripheral B cell selection	1.62E-02	6.51E-02	1	1	HLA-DQB1
GO: Biological Process	positive regulation of chylomicron remnant clearance	1.62E-02	6.51E-02	1	1	GPIHBP1
GO: Biological Process	vascular transport	1.62E-02	6.51E-02	1	1	GJA1
GO: Biological Process	Schwann cell migration	1.62E-02	6.51E-02	1	1	VIM
GO: Biological Process	negative regulation of adenosine receptor signaling pathway	1.62E-02	6.51E-02	1	1	ADA
GO: Biological Process	negative regulation of branch elongation involved in ureteric bud branching by BMP signaling pathway	1.62E-02	6.51E-02	1	1	BMP4
GO: Biological Process	BMP signaling pathway involved in nephric duct formation	1.62E-02	6.51E-02	1	1	BMP4
GO: Biological Process	apolipoprotein A-I-mediated signaling pathway	1.62E-02	6.51E-02	1	1	ABCA1
GO: Biological Process	regulation of MyD88-independent toll-like receptor signaling pathway	1.62E-02	6.51E-02	1	1	IRF7
GO: Biological Process	octopamine metabolic process	1.62E-02	6.51E-02	1	1	DBH
GO: Biological Process	lactic acid secretion	1.62E-02	6.51E-02	1	1	MYC
GO: Biological Process	erythrocyte aggregation	1.62E-02	6.51E-02	1	1	LGALS1
GO: Biological Process	negative regulation of protein glycosylation in Golgi	1.62E-02	6.51E-02	1	1	ACER2
GO: Biological Process	taurine transport	1.62E-02	6.51E-02	1	1	SLC6A6
GO: Biological Process	B cell affinity maturation	1.62E-02	6.51E-02	1	1	HLA-DQB1
GO: Biological Process	regulation of mRNA stability involved in response to stress	1.62E-02	6.51E-02	1	1	IGF2BP1
GO: Biological Process	negative regulation of glomerulus development	1.62E-02	6.51E-02	1	1	BMP4
GO: Biological Process	negative regulation of hepatocyte growth factor biosynthetic process	1.62E-02	6.51E-02	1	1	INHBB
GO: Biological Process	regulation of leukotriene production involved in inflammatory response	1.62E-02	6.51E-02	1	1	SERPINE1
GO: Biological Process	positive regulation of cardiac muscle fiber development	1.62E-02	6.51E-02	1	1	BMP4
GO: Biological Process	synaptonemal complex disassembly	1.62E-02	6.51E-02	1	1	HSPA2
GO: Biological Process	regulation of hepatocyte growth factor production	1.62E-02	6.51E-02	1	1	INHBB
GO: Biological Process	regulation of erythrocyte aggregation	1.62E-02	6.51E-02	1	1	LGALS1
GO: Biological Process	negative regulation of metanephric comma-shaped body morphogenesis	1.62E-02	6.51E-02	1	1	BMP4
GO: Biological Process	BMP signaling pathway involved in ureter morphogenesis	1.62E-02	6.51E-02	1	1	BMP4
GO: Biological Process	negative regulation of cell proliferation involved in heart morphogenesis	1.62E-02	6.51E-02	1	1	BMP4
GO: Biological Process	anterior/posterior pattern specification involved in ureteric bud development	1.62E-02	6.51E-02	1	1	BMP4
GO: Biological Process	regulation of metanephric comma-shaped body morphogenesis	1.62E-02	6.51E-02	1	1	BMP4
GO: Biological Process	regulation of toll-like receptor 7 signaling pathway	1.62E-02	6.51E-02	1	1	RSAD2
GO: Biological Process	negative regulation of renin secretion into blood stream	1.62E-02	6.51E-02	1	1	F2R
GO: Biological Process	metanephric glomerular endothelium development	1.62E-02	6.51E-02	1	1	PDGFB
GO: Biological Process	negative regulation of neutrophil differentiation	1.62E-02	6.51E-02	1	1	INPP5D
GO: Biological Process	regulation of intracellular transport of viral material	1.62E-02	6.51E-02	1	1	BST2
GO: Biological Process	positive regulation of glomerular metanephric mesangial cell proliferation	1.62E-02	6.51E-02	1	1	EGR1
GO: Biological Process	regulation of metanephric cap mesenchymal cell proliferation	1.62E-02	6.51E-02	1	1	MYC
GO: Biological Process	pulmonary artery endothelial tube morphogenesis	1.62E-02	6.51E-02	1	1	BMP4
GO: Biological Process	negative regulation of exit from mitosis	1.62E-02	6.51E-02	1	1	RGCC
GO: Biological Process	regulation of metanephric S-shaped body morphogenesis	1.62E-02	6.51E-02	1	1	BMP4
GO: Biological Process	negative regulation of mesenchymal cell proliferation involved in ureter development	1.62E-02	6.51E-02	1	1	BMP4
GO: Biological Process	photoreactive repair	1.62E-02	6.51E-02	1	1	CRY2
GO: Biological Process	BMP signaling pathway involved in renal system segmentation	1.62E-02	6.51E-02	1	1	BMP4
GO: Biological Process	regulation of Schwann cell migration	1.62E-02	6.51E-02	1	1	VIM
GO: Biological Process	specification of ureteric bud anterior/posterior symmetry	1.62E-02	6.51E-02	1	1	BMP4
GO: Biological Process	intermediate mesoderm formation	1.62E-02	6.51E-02	1	1	BMP4
GO: Biological Process	specification of ureteric bud anterior/posterior symmetry by BMP signaling pathway	1.62E-02	6.51E-02	1	1	BMP4
GO: Biological Process	leucine import	1.62E-02	6.51E-02	1	1	SLC3A2
GO: Biological Process	positive regulation of receptor catabolic process	1.62E-02	6.51E-02	1	1	APOE
GO: Biological Process	regulation of plasmacytoid dendritic cell cytokine production	1.62E-02	6.51E-02	1	1	BST2
GO: Biological Process	intermediate mesodermal cell differentiation	1.62E-02	6.51E-02	1	1	BMP4
GO: Biological Process	regulation of chylomicron remnant clearance	1.62E-02	6.51E-02	1	1	GPIHBP1
GO: Biological Process	macrophage migration inhibitory factor signaling pathway	1.62E-02	6.51E-02	1	1	CD74
GO: Biological Process	beta-alanine transport	1.62E-02	6.51E-02	1	1	SLC6A6
GO: Biological Process	regulation of transcription from RNA polymerase II promoter involved in kidney development	1.62E-02	6.51E-02	1	1	BMP4
GO: Biological Process	hepatocyte growth factor biosynthetic process	1.62E-02	6.51E-02	1	1	INHBB
GO: Biological Process	positive regulation of metanephric cap mesenchymal cell proliferation	1.62E-02	6.51E-02	1	1	MYC
GO: Biological Process	negative regulation of intracellular transport of viral material	1.62E-02	6.51E-02	1	1	BST2
GO: Biological Process	seminal vesicle epithelium development	1.62E-02	6.51E-02	1	1	SERPINE2
GO: Biological Process	deoxyadenosine metabolic process	1.62E-02	6.51E-02	1	1	ADA
GO: Biological Process	negative regulation of penile erection	1.62E-02	6.51E-02	1	1	ADA
GO: Biological Process	regulation of branching involved in salivary gland morphogenesis by epithelial-mesenchymal signaling	1.62E-02	6.51E-02	1	1	PDGFA
GO: Biological Process	xanthine catabolic process	1.62E-02	6.51E-02	1	1	XDH
GO: Biological Process	negative regulation of metanephric S-shaped body morphogenesis	1.62E-02	6.51E-02	1	1	BMP4
GO: Biological Process	negative regulation of interferon-alpha production	1.62E-02	6.51E-02	1	1	GBP6
GO: Biological Process	extracellular amino acid transport	1.62E-02	6.51E-02	1	1	SLC1A5
GO: Biological Process	hepatocyte growth factor production	1.62E-02	6.51E-02	1	1	INHBB
GO: Biological Process	positive regulation of leukotriene production involved in inflammatory response	1.62E-02	6.51E-02	1	1	SERPINE1
GO: Biological Process	milk ejection	1.62E-02	6.51E-02	1	1	GJA1
GO: Biological Process	protein kinase C deactivation	1.62E-02	6.51E-02	1	1	EDN1
GO: Biological Process	radial pattern formation	1.62E-02	6.51E-02	1	1	NR2F2
GO: Biological Process	metanephric glomerular mesangial cell development	1.62E-02	6.51E-02	1	1	PDGFB
GO: Biological Process	intermediate mesoderm morphogenesis	1.62E-02	6.51E-02	1	1	BMP4
GO: Biological Process	eye pigment granule organization	1.62E-02	6.51E-02	1	1	SHROOM2
GO: Biological Process	positive regulation of low-density lipoprotein particle receptor catabolic process	1.62E-02	6.51E-02	1	1	APOE
GO: Biological Process	plasmacytoid dendritic cell cytokine production	1.62E-02	6.51E-02	1	1	BST2
GO: Biological Process	negative regulation of branch elongation involved in ureteric bud branching	1.62E-02	6.51E-02	1	1	BMP4
GO: Biological Process	positive regulation of toll-like receptor 7 signaling pathway	1.62E-02	6.51E-02	1	1	RSAD2
GO: Biological Process	negative regulation of vasculogenesis	1.62E-02	6.51E-02	1	1	XDH
GO: Biological Process	regulation of hepatocyte growth factor biosynthetic process	1.62E-02	6.51E-02	1	1	INHBB
GO: Biological Process	negative regulation of positive chemotaxis	1.62E-02	6.51E-02	1	1	ANGPT2
GO: Biological Process	seminal vesicle development	1.62E-02	6.51E-02	1	1	SERPINE2
GO: Biological Process	intussusceptive angiogenesis	1.62E-02	6.51E-02	1	1	CYR61
GO: Biological Process	putrescine biosynthetic process from ornithine	1.62E-02	6.51E-02	1	1	ODC1
GO: Biological Process	regulation of cardiac muscle fiber development	1.62E-02	6.51E-02	1	1	BMP4
GO: Biological Process	negative regulation of plasmacytoid dendritic cell cytokine production	1.62E-02	6.51E-02	1	1	BST2
GO: Biological Process	positive regulation of erythrocyte aggregation	1.62E-02	6.51E-02	1	1	LGALS1
GO: Biological Process	bud dilation involved in lung branching	1.62E-02	6.51E-02	1	1	BMP4
GO: Biological Process	regulation of organ morphogenesis	1.63E-02	6.51E-02	7	161	"GPC3,BMP4,MYC,EDN1,PDGFA,PLAU,STAT1"
GO: Biological Process	positive regulation of osteoblast differentiation	1.63E-02	6.52E-02	4	60	"BMP4,NPNT,CYR61,IFI16"
GO: Biological Process	negative regulation of inflammatory response	1.63E-02	6.53E-02	5	91	"PPARG,ADA,ZFP36,IER3,APOE"
GO: Biological Process	hexose metabolic process	1.65E-02	6.59E-02	10	280	"SIK1,IER3,MYC,PFKFB3,C1QTNF1,IGF2,IGFBP3,MAN1C1,NR1D1,DDIT4"
GO: Biological Process	chordate embryonic development	1.65E-02	6.59E-02	18	637	"GJA1,HOXB9,ADA,BCL2L1,JUNB,SULF2,BMP4,SHROOM3,NR2F2,ALDH1A2,VCAM1,EDN1,LY6E,PDGFB,SOCS3,MKL2,CYR61,MAFF"
GO: Biological Process	transcription initiation from RNA polymerase II promoter	1.67E-02	6.65E-02	8	200	"PPARG,JUNB,NR2F6,SERPINE1,NR1D2,MYC,NR1D1,CTGF"
GO: Biological Process	negative regulation of peptidase activity	1.67E-02	6.65E-02	8	200	"SERPINA3,GPC3,TIMP1,BCL2L1,BST2,SERPINE1,IFI16,SERPINE2"
GO: Biological Process	muscle cell differentiation	1.69E-02	6.71E-02	11	323	"SIK1,BMP4,EDN1,UCHL1,PDGFB,IGF2,IGFBP3,MKL2,NPNT,CYP26B1,LGALS1"
GO: Biological Process	anion transport	1.70E-02	6.76E-02	15	500	"ACE,ABCA1,PPARG,SLC10A6,SLC6A6,GJA1,PLIN2,P2RY2,SLC1A5,CLCA1,SLC3A2,MYC,APOE,CRY2,NMB"
GO: Biological Process	maintenance of location	1.72E-02	6.85E-02	10	282	"SYNE3,ABCA1,PPARG,PLIN2,ITGB3,CXCL10,F2R,APOE,FITM2,PNPLA2"
GO: Biological Process	tissue homeostasis	1.73E-02	6.86E-02	7	163	"SERPINA3,ITGB3,XDH,INPP5D,F2R,CTGF,CTSS"
GO: Biological Process	regulation of cholesterol transport	1.75E-02	6.92E-02	3	34	"ABCA1,PPARG,APOE"
GO: Biological Process	brown fat cell differentiation	1.75E-02	6.92E-02	3	34	"PPARG,FABP4,LRG1"
GO: Biological Process	regulation of sterol transport	1.75E-02	6.92E-02	3	34	"ABCA1,PPARG,APOE"
GO: Biological Process	icosanoid secretion	1.75E-02	6.92E-02	3	34	"ACE,P2RY2,NMB"
GO: Biological Process	positive regulation of transcription from RNA polymerase II promoter	1.77E-02	6.97E-02	22	834	"IL33,PPARG,DBP,HOXB9,JUNB,KLF9,HMGA1,BMP4,SERPINE1,IRF7,NLRC5,CXCL10,TEF,MYC,IGF2,MKL2,NPNT,CYR61,IFI16,CDH13,EGR1,STAT1"
GO: Biological Process	positive regulation of endocytosis	1.78E-02	7.02E-02	5	93	"GPC3,SELE,SERPINE1,CD14,CD63"
GO: Biological Process	insulin secretion	1.81E-02	7.12E-02	8	203	"PIM3,KCNB1,INHBB,HLA-DRB5,MTNR1B,UCP2,NR1D1,MYRIP"
GO: Biological Process	regulation of skeletal muscle tissue development	1.82E-02	7.12E-02	4	62	"BMP4,NR1D2,IGFBP3,CYP26B1"
GO: Biological Process	regulation of tissue remodeling	1.82E-02	7.12E-02	4	62	"GJA1,ITGB3,INPP5D,IL15"
GO: Biological Process	embryonic limb morphogenesis	1.82E-02	7.12E-02	6	128	"GPC3,GJA1,BMP4,ALDH1A2,CYP26B1,ZBTB16"
GO: Biological Process	positive regulation of apoptotic signaling pathway	1.82E-02	7.12E-02	6	128	"SERINC3,DAXX,BCL2L1,INHBB,MYC,TNFRSF12A"
GO: Biological Process	immunoglobulin mediated immune response	1.82E-02	7.12E-02	6	128	"IRF7,INPP5D,HLA-DRB5,HLA-DQB1,HLA-DMA,CD74"
GO: Biological Process	embryonic appendage morphogenesis	1.82E-02	7.12E-02	6	128	"GPC3,GJA1,BMP4,ALDH1A2,CYP26B1,ZBTB16"
GO: Biological Process	chaperone mediated protein folding requiring cofactor	1.82E-02	7.12E-02	2	13	"HLA-DMA,CD74"
GO: Biological Process	regulation of cholesterol storage	1.82E-02	7.12E-02	2	13	"ABCA1,PPARG"
GO: Biological Process	white fat cell differentiation	1.82E-02	7.12E-02	2	13	"PPARG,FABP4"
GO: Biological Process	regulation of protein secretion	1.83E-02	7.17E-02	7	165	"IL33,CD274,RGCC,HLA-DRB5,F2R,RSAD2,CD14"
GO: Biological Process	axonogenesis	1.84E-02	7.18E-02	16	551	"UNC5A,ITGB3,ITGA1,VIM,S100A6,UCHL1,APOE,CXCL12,COL4A1,COL4A2,SEMA7A,TYROBP,TNFRSF12A,FN1,RHOB,FLRT2"
GO: Biological Process	protein autophosphorylation	1.86E-02	7.24E-02	8	204	"PIM3,STK17B,SIK1,NEK6,ERRFI1,PDGFB,PDGFA,PIM1"
GO: Biological Process	receptor metabolic process	1.88E-02	7.33E-02	6	129	"PPARG,ITGB3,SELE,EDN1,APOE,NR1D1"
GO: Biological Process	positive regulation of chemokine production	1.89E-02	7.34E-02	3	35	"IL33,P2RY2,CD74"
GO: Biological Process	regulation of intrinsic apoptotic signaling pathway in response to DNA damage	1.89E-02	7.34E-02	3	35	"BCL2L1,CXCL12,CD74"
GO: Biological Process	positive regulation of actin filament bundle assembly	1.89E-02	7.34E-02	3	35	"SYNPO,RGCC,CTGF"
GO: Biological Process	glucose metabolic process	1.90E-02	7.37E-02	9	245	"SIK1,IER3,MYC,PFKFB3,C1QTNF1,IGF2,IGFBP3,NR1D1,DDIT4"
GO: Biological Process	ovarian follicle development	1.92E-02	7.42E-02	4	63	"BCL2L1,BMP4,INHBB,MMP2"
GO: Biological Process	cellular defense response	1.92E-02	7.42E-02	4	63	"B2M,TYROBP,LGALS3BP,MNDA"
GO: Biological Process	positive regulation of B cell activation	1.92E-02	7.42E-02	4	63	"CDKN1A,ADA,INPP5D,CD74"
GO: Biological Process	response to estrogen	1.95E-02	7.51E-02	7	167	"PPARG,NR2F2,ALDH1A2,PDGFB,PDGFA,CTGF,MMP2"
GO: Biological Process	limb development	1.95E-02	7.51E-02	7	167	"GPC3,GJA1,BMP4,NR2F2,ALDH1A2,CYP26B1,ZBTB16"
GO: Biological Process	appendage development	1.95E-02	7.51E-02	7	167	"GPC3,GJA1,BMP4,NR2F2,ALDH1A2,CYP26B1,ZBTB16"
GO: Biological Process	ion transport	1.98E-02	7.65E-02	33	1401	"ACE,ABCA1,PPARG,SLC10A6,SLC6A6,GJA1,KCNB1,SIK1,KCND3,ADA,CYBB,PLIN2,P2RY2,SLC1A5,CXCL10,CLCA1,SLC3A2,F2R,MYC,EDN1,S100A6,UCP2,PDGFB,APOE,CXCL12,SHROOM2,CTGF,KCNK5,CRY2,NMB,AQP11,SERPINE2,CD63"
GO: Biological Process	organic hydroxy compound transport	2.00E-02	7.72E-02	7	168	"ABCA1,PPARG,MYC,LY6E,APOE,CXCL12,AQP11"
GO: Biological Process	regulation of B cell activation	2.01E-02	7.74E-02	5	96	"CDKN1A,ADA,INPP5D,MNDA,CD74"
GO: Biological Process	response to temperature stimulus	2.01E-02	7.75E-02	6	131	"PPARG,NR2F6,CIRBP,CXCL10,CXCL12,CD14"
GO: Biological Process	negative regulation of lipid metabolic process	2.02E-02	7.76E-02	4	64	"SIK1,PDGFB,PDGFA,APOE"
GO: Biological Process	response to cold	2.04E-02	7.80E-02	3	36	"PPARG,CIRBP,CXCL10"
GO: Biological Process	coronary vasculature development	2.04E-02	7.80E-02	3	36	"ACE,GPC3,PDGFB"
GO: Biological Process	regulation of endocrine process	2.04E-02	7.80E-02	3	36	"INHBB,APLN,F2R"
GO: Biological Process	fear response	2.04E-02	7.80E-02	3	36	"GJA1,DBH,MDK"
GO: Biological Process	positive regulation of reproductive process	2.04E-02	7.80E-02	3	36	"P2RY2,INHBB,PLAU"
GO: Biological Process	B cell mediated immunity	2.08E-02	7.93E-02	6	132	"IRF7,INPP5D,HLA-DRB5,HLA-DQB1,HLA-DMA,CD74"
GO: Biological Process	regulation of leukocyte mediated immunity	2.08E-02	7.93E-02	6	132	"B2M,BST2,HLA-E,HLA-A,RSAD2,TAP1"
GO: Biological Process	neuron migration	2.08E-02	7.93E-02	6	132	"GJA1,GPR56,NR2F2,CXCL12,FLRT2,DDIT4"
GO: Biological Process	cellular response to metal ion	2.09E-02	7.93E-02	5	97	"PPARG,JUNB,MT1H,FABP4,FN1"
GO: Biological Process	positive regulation of sterol transport	2.10E-02	7.93E-02	2	14	"ABCA1,APOE"
GO: Biological Process	mesenchymal to epithelial transition involved in metanephros morphogenesis	2.10E-02	7.93E-02	2	14	"BMP4,STAT1"
GO: Biological Process	cerebellar granular layer development	2.10E-02	7.93E-02	2	14	"MDK,SERPINE2"
GO: Biological Process	negative regulation of smooth muscle cell migration	2.10E-02	7.93E-02	2	14	"SERPINE1,IGFBP3"
GO: Biological Process	ureter development	2.10E-02	7.93E-02	2	14	"BMP4,ALDH1A2"
GO: Biological Process	nucleotide salvage	2.10E-02	7.93E-02	2	14	"ADA,UCK2"
GO: Biological Process	regulation of cellular senescence	2.10E-02	7.93E-02	2	14	"HMGA1,NEK6"
GO: Biological Process	response to leptin	2.10E-02	7.93E-02	2	14	"INHBB,NR1D1"
GO: Biological Process	cholesterol storage	2.10E-02	7.93E-02	2	14	"ABCA1,PPARG"
GO: Biological Process	trophoblast giant cell differentiation	2.10E-02	7.93E-02	2	14	"NR2F2,SOCS3"
GO: Biological Process	negative regulation of B cell proliferation	2.10E-02	7.93E-02	2	14	"INPP5D,MNDA"
GO: Biological Process	positive regulation of cholesterol transport	2.10E-02	7.93E-02	2	14	"ABCA1,APOE"
GO: Biological Process	lipid metabolic process	2.12E-02	7.99E-02	30	1253	"ST8SIA6,SERPINA3,THRSP,ABCA1,PPARG,GPC3,SIK1,PLIN2,PAFAH1B3,INPP5D,NR1D2,FABP4,NR2F2,ALDH1A2,EDN1,ACER2,CERK,LTC4S,PDGFB,CH25H,PDGFA,APOE,FITM2,PNPLA2,IGF2,CYR61,NR1D1,CYP26B1,CTGF,CD74"
GO: Biological Process	regulation of cellular response to growth factor stimulus	2.12E-02	7.99E-02	7	170	"PMEPA1,SULF2,ITGB3,BMP4,XDH,PDGFB,NPNT"
GO: Biological Process	endothelial cell differentiation	2.13E-02	7.99E-02	4	65	"COL18A1,BMP4,XDH,NR2F2"
GO: Biological Process	embryo development	2.14E-02	8.05E-02	26	1050	"GPC3,GJA1,HOXB9,ADA,HOXD8,BCL2L1,IRX3,JUNB,SULF2,BMP4,SHROOM3,ABCG2,NR2F2,ALDH1A2,VCAM1,MYC,EDN1,LY6E,PDGFB,PDGFA,SOCS3,MKL2,CYR61,CYP26B1,MAFF,ZBTB16"
GO: Biological Process	monocarboxylic acid transport	2.15E-02	8.08E-02	6	133	"ACE,PPARG,PLIN2,P2RY2,MYC,NMB"
GO: Biological Process	negative regulation of endopeptidase activity	2.18E-02	8.18E-02	7	171	"SERPINA3,TIMP1,BCL2L1,BST2,SERPINE1,IFI16,SERPINE2"
GO: Biological Process	regulation of toll-like receptor signaling pathway	2.19E-02	8.18E-02	3	37	"IRF7,RSAD2,NR1D1"
GO: Biological Process	regulation of cellular carbohydrate catabolic process	2.19E-02	8.18E-02	3	37	"IER3,MYC,DDIT4"
GO: Biological Process	salivary gland morphogenesis	2.19E-02	8.18E-02	3	37	"TGM2,PDGFB,PDGFA"
GO: Biological Process	negative regulation of insulin secretion	2.19E-02	8.18E-02	3	37	"PIM3,INHBB,UCP2"
GO: Biological Process	regulation of carbohydrate catabolic process	2.19E-02	8.18E-02	3	37	"IER3,MYC,DDIT4"
GO: Biological Process	activation of MAPKK activity	2.23E-02	8.33E-02	4	66	"GADD45G,BMP4,F2R,MAP3K6"
GO: Biological Process	intrinsic apoptotic signaling pathway by p53 class mediator	2.23E-02	8.33E-02	4	66	"CDKN1A,IFI16,CD74,DDIT4"
GO: Biological Process	cell division	2.26E-02	8.40E-02	17	612	"DAXX,BCL2L1,BMP4,WEE1,CKS1B,RGCC,GEM,NEK6,MYC,EDN1,MDK,PDGFB,PDGFA,IGF2,CCNY,RHOB,ZBTB16"
GO: Biological Process	organonitrogen compound biosynthetic process	2.29E-02	8.52E-02	19	709	"CMPK2,ST8SIA6,ABCA1,GPC3,DBH,ODC1,OAS2,OAS1,BGN,ADA,CHST2,MYC,EDN1,ACER2,UCK2,PDGFB,APOE,CYR61,FPGS"
GO: Biological Process	positive regulation of cell division	2.35E-02	8.69E-02	4	67	"MDK,PDGFB,PDGFA,IGF2"
GO: Biological Process	regulation of cell-matrix adhesion	2.35E-02	8.69E-02	4	67	"SERPINE1,ACER2,PLAU,CDH13"
GO: Biological Process	T cell selection	2.35E-02	8.69E-02	3	38	"IL15,HLA-DMA,CD74"
GO: Biological Process	positive regulation of mesenchymal cell proliferation	2.35E-02	8.69E-02	3	38	"MYC,PDGFA,STAT1"
GO: Biological Process	icosanoid transport	2.35E-02	8.69E-02	3	38	"ACE,P2RY2,NMB"
GO: Biological Process	positive regulation of B cell proliferation	2.35E-02	8.69E-02	3	38	"CDKN1A,ADA,CD74"
GO: Biological Process	cellular senescence	2.35E-02	8.69E-02	3	38	"CDKN1A,HMGA1,NEK6"
GO: Biological Process	fatty acid derivative transport	2.35E-02	8.69E-02	3	38	"ACE,P2RY2,NMB"
GO: Biological Process	embryonic organ development	2.35E-02	8.69E-02	13	429	"GJA1,ADA,JUNB,BMP4,NR2F2,ALDH1A2,VCAM1,MYC,EDN1,PDGFB,SOCS3,MKL2,CYR61"
GO: Biological Process	epithelial tube morphogenesis	2.36E-02	8.70E-02	11	340	"GPC3,GJA1,IRX3,BMP4,SHROOM3,ALDH1A2,MYC,EDN1,CXCL12,NPNT,MGP"
GO: Biological Process	muscle contraction	2.37E-02	8.73E-02	10	297	"GJA1,ACTA2,ADA,SULF2,ITGA1,VIM,F2R,EDN1,NPNT,CTGF"
GO: Biological Process	regulation of neuron projection development	2.37E-02	8.73E-02	10	297	"P2RY2,VIM,GPRC5B,APOE,CXCL12,SEMA7A,TNFRSF12A,FN1,LGALS1,SERPINE2"
GO: Biological Process	cellular response to gamma radiation	2.40E-02	8.78E-02	2	15	"BCL2L1,EGR1"
GO: Biological Process	penile erection	2.40E-02	8.78E-02	2	15	"ADA,P2RY2"
GO: Biological Process	metanephric mesenchyme development	2.40E-02	8.78E-02	2	15	"MYC,STAT1"
GO: Biological Process	positive regulation of protein autophosphorylation	2.40E-02	8.78E-02	2	15	"PDGFB,PDGFA"
GO: Biological Process	regulation of transcription involved in cell fate commitment	2.40E-02	8.78E-02	2	15	"BMP4,NR2F2"
GO: Biological Process	regulation of monocyte chemotaxis	2.40E-02	8.78E-02	2	15	"SERPINE1,CXCL12"
GO: Biological Process	regulation of thymocyte apoptotic process	2.40E-02	8.78E-02	2	15	"ADA,BMP4"
GO: Biological Process	integrin-mediated signaling pathway	2.44E-02	8.93E-02	5	101	"ITGB3,ITGA1,SEMA7A,TYROBP,CTGF"
GO: Biological Process	positive regulation of protein catabolic process	2.44E-02	8.93E-02	5	101	"IL33,GPC3,GJA1,IER3,APOE"
GO: Biological Process	digestive system development	2.45E-02	8.93E-02	6	137	"ADA,BMP4,CLMP,ALDH1A2,PDGFA,IGF2"
GO: Biological Process	cellular response to transforming growth factor beta stimulus	2.45E-02	8.94E-02	8	215	"PMEPA1,JUNB,SERPINE1,MYC,PDGFB,PDGFA,COL4A2,NPNT"
GO: Biological Process	modification of morphology or physiology of other organism involved in symbiotic interaction	2.46E-02	8.97E-02	4	68	"BCL2L1,MYC,TAP1,IFIT1"
GO: Biological Process	intrinsic apoptotic signaling pathway	2.49E-02	9.07E-02	9	257	"SERINC3,CDKN1A,BCL2L1,IER3,MYC,CXCL12,IFI16,CD74,DDIT4"
GO: Biological Process	germ cell development	2.51E-02	9.11E-02	7	176	"HSPA2,BCL2L1,BMP4,INHBB,ANGPT2,CXCL12,ZBTB16"
GO: Biological Process	regulation of stress-activated MAPK cascade	2.51E-02	9.11E-02	7	176	"DAXX,GADD45G,XDH,MYC,EDN1,MAP3K6,CTGF"
GO: Biological Process	response to transforming growth factor beta	2.51E-02	9.12E-02	8	216	"PMEPA1,JUNB,SERPINE1,MYC,PDGFB,PDGFA,COL4A2,NPNT"
GO: Biological Process	protein kinase C-activating G-protein coupled receptor signaling pathway	2.52E-02	9.12E-02	3	39	"F2R,EDN1,CERK"
GO: Biological Process	drug transport	2.52E-02	9.12E-02	3	39	"ADA,ABCG2,EDN1"
GO: Biological Process	neuron projection regeneration	2.52E-02	9.12E-02	3	39	"RTN4RL2,APOE,MMP2"
GO: Biological Process	acute inflammatory response	2.52E-02	9.13E-02	6	138	"SERPINA3,PPARG,CFB,PRCP,VCAM1,FN1"
GO: Biological Process	antigen receptor-mediated signaling pathway	2.52E-02	9.13E-02	6	138	"ADA,INPP5D,HLA-DRB5,HLA-DQB1,HLA-DQA1,MNDA"
GO: Biological Process	regulation of metal ion transport	2.55E-02	9.20E-02	9	258	"ACE,GJA1,SIK1,CXCL10,F2R,PDGFB,CXCL12,SERPINE2,CD63"
GO: Biological Process	regulation of stress-activated protein kinase signaling cascade	2.57E-02	9.28E-02	7	177	"DAXX,GADD45G,XDH,MYC,EDN1,MAP3K6,CTGF"
GO: Biological Process	branching involved in ureteric bud morphogenesis	2.58E-02	9.28E-02	4	69	"GPC3,BMP4,MYC,NPNT"
GO: Biological Process	glycolytic process	2.58E-02	9.28E-02	4	69	"IER3,MYC,PFKFB3,DDIT4"
GO: Biological Process	lymphocyte apoptotic process	2.58E-02	9.28E-02	4	69	"ADA,BMP4,MYC,CD74"
GO: Biological Process	positive regulation of T cell differentiation	2.58E-02	9.28E-02	4	69	"ADA,HLA-DQA1,HLA-DMA,CD74"
GO: Biological Process	lens development in camera-type eye	2.58E-02	9.28E-02	4	69	"GJA1,BMP4,VIM,SHROOM2"
GO: Biological Process	regulation of epithelial cell differentiation	2.63E-02	9.45E-02	5	103	"BMP4,XDH,ERRFI1,MAFF,STAT1"
GO: Biological Process	lipid transport	2.66E-02	9.54E-02	9	260	"ACE,ABCA1,PPARG,PLIN2,ITGB3,P2RY2,GPIHBP1,APOE,NMB"
GO: Biological Process	positive regulation of peptidyl-tyrosine phosphorylation	2.68E-02	9.61E-02	6	140	"ITGB3,IL15,EHD4,PDGFB,IGF2,CD74"
GO: Biological Process	response to nicotine	2.69E-02	9.61E-02	3	40	"VCAM1,EDN1,IGF2"
GO: Biological Process	regulation of chondrocyte differentiation	2.69E-02	9.61E-02	3	40	"BMP4,CTGF,ZBTB16"
GO: Biological Process	nucleoside diphosphate metabolic process	2.69E-02	9.61E-02	3	40	"CMPK2,AK1,ENTPD1"
GO: Biological Process	negative regulation of myeloid cell differentiation	2.70E-02	9.61E-02	4	70	"ZFP36,INPP5D,MYC,ZBTB16"
GO: Biological Process	ceramide metabolic process	2.70E-02	9.61E-02	4	70	"ST8SIA6,ACER2,CERK,CYR61"
GO: Biological Process	metanephric renal vesicle morphogenesis	2.71E-02	9.61E-02	2	16	"BMP4,STAT1"
GO: Biological Process	azole transport	2.71E-02	9.61E-02	2	16	"ADA,EDN1"
GO: Biological Process	metanephric glomerulus development	2.71E-02	9.61E-02	2	16	"PDGFB,EGR1"
GO: Biological Process	response to increased oxygen levels	2.71E-02	9.61E-02	2	16	"CDKN1A,EGR1"
GO: Biological Process	cellular response to lithium ion	2.71E-02	9.61E-02	2	16	"PPARG,FABP4"
GO: Biological Process	plasminogen activation	2.71E-02	9.61E-02	2	16	"SERPINE1,SERPINE2"
GO: Biological Process	regulation of endothelial cell differentiation	2.71E-02	9.61E-02	2	16	"BMP4,XDH"
GO: Biological Process	response to vitamin A	2.71E-02	9.61E-02	2	16	"PPARG,ALDH1A2"
GO: Biological Process	response to hyperoxia	2.71E-02	9.61E-02	2	16	"CDKN1A,EGR1"
GO: Biological Process	germinal center formation	2.71E-02	9.61E-02	2	16	"ADA,HLA-DMA"
GO: Biological Process	actin filament organization	2.72E-02	9.61E-02	9	261	"ACTN1,SYNPO,RGCC,CAPG,GAS7,CXCL12,SHROOM2,CTGF,ELN"
GO: Biological Process	alpha-beta T cell activation	2.73E-02	9.65E-02	5	104	"GADD45G,ADA,IL15,HLA-DQB1,RSAD2"
GO: Biological Process	regulation of lymphocyte mediated immunity	2.83E-02	9.98E-02	5	105	"B2M,HLA-E,HLA-A,RSAD2,TAP1"
GO: Biological Process	regulation of phosphatidylinositol 3-kinase signaling	2.83E-02	9.98E-02	4	71	"F2R,PDGFB,PDGFA,SERPINE2"
GO: Biological Process	oligodendrocyte differentiation	2.83E-02	9.98E-02	4	71	"PPARG,BMP4,APOE,EGR1"
GO: Biological Process	muscle system process	2.83E-02	9.98E-02	11	350	"GJA1,ACTA2,ADA,SULF2,ITGA1,VIM,IL15,F2R,EDN1,NPNT,CTGF"
GO: Biological Process	temperature homeostasis	2.87E-02	1.01E-01	3	41	"DBH,APLN,NR1D1"
GO: Biological Process	salivary gland development	2.87E-02	1.01E-01	3	41	"TGM2,PDGFB,PDGFA"
GO: Biological Process	negative regulation of growth	2.89E-02	1.02E-01	8	222	"PPARG,GPC3,CDKN1A,BST2,BMP4,MT1H,IFI16,SERPINE2"
GO: Biological Process	regulation of organelle organization	2.89E-02	1.02E-01	18	679	"BCL2L1,BST2,BMP4,IER3,SYNPO,RGCC,NEK6,CAPG,MYC,EDN1,PDGFB,PDGFA,CXCL12,IGF2,SHROOM2,CTGF,JDP2,ELN"
GO: Biological Process	inner ear development	2.94E-02	1.03E-01	7	182	"BMP4,HLA-E,BMPER,HLA-A,HLA-DMA,PDGFA,IFI16"
GO: Biological Process	phospholipase C-activating G-protein coupled receptor signaling pathway	2.96E-02	1.04E-01	4	72	"TGM2,P2RY2,F2R,EDN1"
GO: Biological Process	regulation of transmembrane receptor protein serine/threonine kinase signaling pathway	3.01E-02	1.04E-01	7	183	"GPC3,PMEPA1,BMP4,BMPER,ZNF423,NPNT,CYR61"
GO: Biological Process	branching morphogenesis of an epithelial tube	3.01E-02	1.04E-01	7	183	"GPC3,BMP4,MYC,EDN1,CXCL12,NPNT,MGP"
GO: Biological Process	T cell receptor signaling pathway	3.04E-02	1.04E-01	5	107	"ADA,INPP5D,HLA-DRB5,HLA-DQB1,HLA-DQA1"
GO: Biological Process	cellular response to inorganic substance	3.04E-02	1.04E-01	5	107	"PPARG,JUNB,MT1H,FABP4,FN1"
GO: Biological Process	positive regulation of protein secretion	3.04E-02	1.04E-01	5	107	"IL33,CD274,RGCC,F2R,CD14"
GO: Biological Process	negative chemotaxis	3.04E-02	1.04E-01	2	17	"PDGFA,FLRT2"
GO: Biological Process	fibroblast apoptotic process	3.04E-02	1.04E-01	2	17	"STK17B,MYC"
GO: Biological Process	regulation of interferon-alpha production	3.04E-02	1.04E-01	2	17	"IRF7,GBP6"
GO: Biological Process	nucleoside diphosphate phosphorylation	3.04E-02	1.04E-01	2	17	"CMPK2,AK1"
GO: Biological Process	regulation of membrane protein ectodomain proteolysis	3.04E-02	1.04E-01	2	17	"TIMP1,APOE"
GO: Biological Process	interferon-alpha production	3.04E-02	1.04E-01	2	17	"IRF7,GBP6"
GO: Biological Process	reverse cholesterol transport	3.04E-02	1.04E-01	2	17	"ABCA1,APOE"
GO: Biological Process	hindlimb morphogenesis	3.05E-02	1.04E-01	3	42	"GPC3,BMP4,ZBTB16"
GO: Biological Process	negative regulation of response to DNA damage stimulus	3.05E-02	1.04E-01	3	42	"BCL2L1,CXCL12,CD74"
GO: Biological Process	response to exogenous dsRNA	3.05E-02	1.04E-01	3	42	"SLC3A2,IFIT1,STAT1"
GO: Biological Process	collagen catabolic process	3.09E-02	1.04E-01	4	73	"COL18A1,COL4A1,COL4A2,MMP2"
GO: Biological Process	nucleoside triphosphate biosynthetic process	3.09E-02	1.04E-01	4	73	"CMPK2,AK1,MYC,UCK2"
GO: Biological Process	toll-like receptor signaling pathway	3.11E-02	1.04E-01	6	145	"IRF7,TRIL,RSAD2,NR1D1,CD14,CTSS"
GO: Biological Process	regulation of myeloid leukocyte differentiation	3.14E-02	1.04E-01	5	108	"ITGB3,IRF7,INPP5D,MYC,TYROBP"
GO: Biological Process	cytoskeleton organization	3.15E-02	1.04E-01	23	935	"SYNE3,ACTN1,BST2,WEE1,SYNPO,SHROOM3,RGCC,FAM101B,NEK6,VIM,CAPG,EDN1,GAS7,PDGFB,PDGFA,APOE,CXCL12,FITM2,SHROOM2,CTGF,TACC2,ARHGDIB,ELN"
GO: Biological Process	transforming growth factor beta receptor signaling pathway	3.17E-02	1.04E-01	7	185	"PMEPA1,JUNB,SERPINE1,MYC,PDGFB,PDGFA,NPNT"
GO: Biological Process	regulation of muscle contraction	3.20E-02	1.04E-01	6	146	"GJA1,ADA,F2R,EDN1,NPNT,CTGF"
GO: Biological Process	paracrine signaling	3.22E-02	1.04E-01	1	2	PDGFB
GO: Biological Process	negative regulation of immunoglobulin secretion	3.22E-02	1.04E-01	1	2	IL33
GO: Biological Process	skeletal muscle fiber differentiation	3.22E-02	1.04E-01	1	2	CYP26B1
GO: Biological Process	tryptophan transport	3.22E-02	1.04E-01	1	2	SLC3A2
GO: Biological Process	metanephric glomerular mesangial cell differentiation	3.22E-02	1.04E-01	1	2	PDGFB
GO: Biological Process	regulation of cell communication by chemical coupling	3.22E-02	1.04E-01	1	2	GJA1
GO: Biological Process	metanephric cap development	3.22E-02	1.04E-01	1	2	MYC
GO: Biological Process	tongue muscle cell differentiation	3.22E-02	1.04E-01	1	2	CYP26B1
GO: Biological Process	metanephric cap morphogenesis	3.22E-02	1.04E-01	1	2	MYC
GO: Biological Process	cytosol to ER transport	3.22E-02	1.04E-01	1	2	TAP1
GO: Biological Process	atrial ventricular junction remodeling	3.22E-02	1.04E-01	1	2	GJA1
GO: Biological Process	negative regulation by organism of programmed cell death in other organism involved in symbiotic interaction	3.22E-02	1.04E-01	1	2	BCL2L1
GO: Biological Process	dUDP metabolic process	3.22E-02	1.04E-01	1	2	CMPK2
GO: Biological Process	dUDP biosynthetic process	3.22E-02	1.04E-01	1	2	CMPK2
GO: Biological Process	purine deoxyribonucleoside catabolic process	3.22E-02	1.04E-01	1	2	ADA
GO: Biological Process	metanephric mesangial cell differentiation	3.22E-02	1.04E-01	1	2	PDGFB
GO: Biological Process	negative regulation of dendritic cell cytokine production	3.22E-02	1.04E-01	1	2	BST2
GO: Biological Process	negative regulation by symbiont of host apoptotic process	3.22E-02	1.04E-01	1	2	BCL2L1
GO: Biological Process	"antigen processing and presentation of endogenous peptide antigen via MHC class I via ER pathway, TAP-dependent"	3.22E-02	1.04E-01	1	2	HLA-A
GO: Biological Process	phospholipase D-activating G-protein coupled receptor signaling pathway	3.22E-02	1.04E-01	1	2	EDN1
GO: Biological Process	negative regulation of mucus secretion	3.22E-02	1.04E-01	1	2	ADA
GO: Biological Process	rhythmic excitation	3.22E-02	1.04E-01	1	2	EDN1
GO: Biological Process	regulation of cholesterol transporter activity	3.22E-02	1.04E-01	1	2	PPARG
GO: Biological Process	post-mating behavior	3.22E-02	1.04E-01	1	2	SERPINE2
GO: Biological Process	regulation of rubidium ion transport	3.22E-02	1.04E-01	1	2	CD63
GO: Biological Process	positive regulation of chemokine-mediated signaling pathway	3.22E-02	1.04E-01	1	2	EDN1
GO: Biological Process	isopeptide cross-linking	3.22E-02	1.04E-01	1	2	TGM2
GO: Biological Process	anterior/posterior pattern specification involved in kidney development	3.22E-02	1.04E-01	1	2	BMP4
GO: Biological Process	modulation by virus of host apoptotic process	3.22E-02	1.04E-01	1	2	BCL2L1
GO: Biological Process	antigen processing and presentation of endogenous peptide antigen via MHC class I via ER pathway	3.22E-02	1.04E-01	1	2	HLA-A
GO: Biological Process	"negative regulation of circadian sleep/wake cycle, non-REM sleep"	3.22E-02	1.04E-01	1	2	ADA
GO: Biological Process	canonical Wnt signaling pathway involved in positive regulation of wound healing	3.22E-02	1.04E-01	1	2	MYC
GO: Biological Process	negative regulation of triglyceride biosynthetic process	3.22E-02	1.04E-01	1	2	SIK1
GO: Biological Process	positive regulation of cell communication by chemical coupling	3.22E-02	1.04E-01	1	2	GJA1
GO: Biological Process	negative regulation of smooth muscle cell-matrix adhesion	3.22E-02	1.04E-01	1	2	SERPINE1
GO: Biological Process	positive regulation of toll-like receptor 9 signaling pathway	3.22E-02	1.04E-01	1	2	RSAD2
GO: Biological Process	low-density lipoprotein particle mediated signaling	3.22E-02	1.04E-01	1	2	CDH13
GO: Biological Process	lipoprotein particle mediated signaling	3.22E-02	1.04E-01	1	2	CDH13
GO: Biological Process	dTDP metabolic process	3.22E-02	1.04E-01	1	2	CMPK2
GO: Biological Process	regulation of tongue muscle cell differentiation	3.22E-02	1.04E-01	1	2	CYP26B1
GO: Biological Process	isopeptide cross-linking via N6-(L-isoglutamyl)-L-lysine	3.22E-02	1.04E-01	1	2	TGM2
GO: Biological Process	regulation of gluconeogenesis by regulation of transcription from RNA polymerase II promoter	3.22E-02	1.04E-01	1	2	NR1D1
GO: Biological Process	lymphatic endothelial cell fate commitment	3.22E-02	1.04E-01	1	2	NR2F2
GO: Biological Process	regulation of cyclin-dependent protein serine/threonine kinase activity involved in G2/M transition of mitotic cell cycle	3.22E-02	1.04E-01	1	2	HSPA2
GO: Biological Process	regulation of adenosine receptor signaling pathway	3.22E-02	1.04E-01	1	2	ADA
GO: Biological Process	suppression by virus of host apoptotic process	3.22E-02	1.04E-01	1	2	BCL2L1
GO: Biological Process	antigen processing and presentation of endogenous peptide antigen via MHC class Ib via ER pathway	3.22E-02	1.04E-01	1	2	HLA-E
GO: Biological Process	chronological cell aging	3.22E-02	1.04E-01	1	2	SERPINE1
GO: Biological Process	esophagus smooth muscle contraction	3.22E-02	1.04E-01	1	2	SULF2
GO: Biological Process	mating plug formation	3.22E-02	1.04E-01	1	2	SERPINE2
GO: Biological Process	defecation	3.22E-02	1.04E-01	1	2	MDK
GO: Biological Process	cellular response to blue light	3.22E-02	1.04E-01	1	2	CRY2
GO: Biological Process	dTDP biosynthetic process	3.22E-02	1.04E-01	1	2	CMPK2
GO: Biological Process	cornification	3.22E-02	1.04E-01	1	2	CYP26B1
GO: Biological Process	homoiothermy	3.22E-02	1.04E-01	1	2	DBH
GO: Biological Process	negative regulation of fibroblast growth factor production	3.22E-02	1.04E-01	1	2	RGCC
GO: Biological Process	regulation of metanephric glomerular mesangial cell proliferation	3.22E-02	1.04E-01	1	2	EGR1
GO: Biological Process	metanephric cap mesenchymal cell proliferation involved in metanephros development	3.22E-02	1.04E-01	1	2	MYC
GO: Biological Process	positive regulation of cyclin-dependent protein serine/threonine kinase activity involved in G2/M transition of mitotic cell cycle	3.22E-02	1.04E-01	1	2	HSPA2
GO: Biological Process	"antigen processing and presentation of endogenous peptide antigen via MHC class Ib via ER pathway, TAP-dependent"	3.22E-02	1.04E-01	1	2	HLA-E
GO: Biological Process	organ senescence	3.22E-02	1.04E-01	1	2	CTGF
GO: Biological Process	dATP catabolic process	3.22E-02	1.04E-01	1	2	ADA
GO: Biological Process	circadian temperature homeostasis	3.22E-02	1.04E-01	1	2	NR1D1
GO: Biological Process	liver regeneration	3.22E-02	1.04E-01	1	2	UCP2
GO: Biological Process	negative regulation by symbiont of host programmed cell death	3.22E-02	1.04E-01	1	2	BCL2L1
GO: Biological Process	regulation of transcription involved in lymphatic endothelial cell fate commitment	3.22E-02	1.04E-01	1	2	NR2F2
GO: Biological Process	blue light signaling pathway	3.22E-02	1.04E-01	1	2	CRY2
GO: Biological Process	negative regulation of MDA-5 signaling pathway	3.22E-02	1.04E-01	1	2	DHX58
GO: Biological Process	single-organism reproductive behavior	3.22E-02	1.04E-01	1	2	SERPINE2
GO: Biological Process	negative regulation of metanephric nephron tubule epithelial cell differentiation	3.22E-02	1.04E-01	1	2	STAT1
GO: Biological Process	oncogene-induced cell senescence	3.22E-02	1.04E-01	1	2	HMGA1
GO: Biological Process	intermediate mesoderm development	3.22E-02	1.04E-01	1	2	BMP4
GO: Biological Process	positive regulation of tongue muscle cell differentiation	3.22E-02	1.04E-01	1	2	CYP26B1
GO: Biological Process	regulation of protein glycosylation in Golgi	3.22E-02	1.04E-01	1	2	ACER2
GO: Biological Process	positive regulation of bile acid biosynthetic process	3.22E-02	1.04E-01	1	2	NR1D1
GO: Biological Process	response to anoxia	3.22E-02	1.04E-01	1	2	CTGF
GO: Biological Process	regulation of neutrophil differentiation	3.22E-02	1.04E-01	1	2	INPP5D
GO: Biological Process	positive regulation of intrinsic apoptotic signaling pathway in response to endoplasmic reticulum stress	3.22E-02	1.04E-01	1	2	SERINC3
GO: Biological Process	positive regulation of branching involved in lung morphogenesis	3.22E-02	1.04E-01	1	2	BMP4
GO: Biological Process	negative regulation of leukocyte differentiation	3.23E-02	1.04E-01	4	74	"BMP4,INPP5D,MYC,CD74"
GO: Biological Process	regulation of generation of precursor metabolites and energy	3.23E-02	1.04E-01	4	74	"IER3,MYC,IGF2,DDIT4"
GO: Biological Process	ureteric bud morphogenesis	3.23E-02	1.04E-01	4	74	"GPC3,BMP4,MYC,NPNT"
GO: Biological Process	monosaccharide metabolic process	3.23E-02	1.04E-01	10	313	"SIK1,IER3,MYC,PFKFB3,C1QTNF1,IGF2,IGFBP3,MAN1C1,NR1D1,DDIT4"
GO: Biological Process	cellular response to external stimulus	3.24E-02	1.04E-01	8	227	"DAP,GJA1,CDKN1A,INHBB,IL15,UCP2,IFI16,EGR1"
GO: Biological Process	regulation of systemic arterial blood pressure by hormone	3.24E-02	1.04E-01	3	43	"ACE,F2R,EDN1"
GO: Biological Process	positive regulation of gliogenesis	3.24E-02	1.04E-01	3	43	"PPARG,VIM,SERPINE2"
GO: Biological Process	cartilage development	3.33E-02	1.07E-01	7	187	"SULF2,BMP4,EDN1,CYR61,CTGF,MGP,ZBTB16"
GO: Biological Process	regulation of cell cycle process	3.34E-02	1.07E-01	13	451	"CDKN1A,BCL2L1,BMP4,IER3,RGCC,NEK6,PSMB8,PSMB9,EDN1,PDGFB,IGF2,CTGF,PIM1"
GO: Biological Process	ureteric bud development	3.36E-02	1.08E-01	5	110	"GPC3,BMP4,BMPER,MYC,NPNT"
GO: Biological Process	lipoprotein metabolic process	3.36E-02	1.08E-01	5	110	"ABCA1,OAS2,OLR1,ITGB3,APOE"
GO: Biological Process	negative regulation of protein serine/threonine kinase activity	3.36E-02	1.08E-01	5	110	"CDKN1A,BMP4,NR2F2,UCHL1,APOE"
GO: Biological Process	B cell differentiation	3.36E-02	1.08E-01	5	110	"ADA,INPP5D,HLA-DQB1,VCAM1,LGALS1"
GO: Biological Process	multicellular organismal response to stress	3.37E-02	1.08E-01	4	75	"GJA1,DBH,MDK,LGALS1"
GO: Biological Process	reproductive process	3.37E-02	1.08E-01	27	1147	"ACE,TIMP1,DBH,HSPA2,ADA,BCL2L1,JUNB,KLF9,HMGA1,BMP4,XDH,PAFAH1B3,P2RY2,ABCG2,INHBB,APLN,NR2F2,EDN1,ANGPT2,UCP2,CXCL12,CYP26B1,MAFF,PLAU,ZBTB16,MMP2,SERPINE2"
GO: Biological Process	skeletal system development	3.39E-02	1.08E-01	13	452	"HOXB9,HOXD8,SULF2,BMP4,MYC,EDN1,IGF2,CYR61,CYP26B1,CTGF,MGP,ZBTB16,MMP2"
GO: Biological Process	asymmetric protein localization	3.39E-02	1.08E-01	2	18	"SHROOM3,SHROOM2"
GO: Biological Process	vascular smooth muscle contraction	3.39E-02	1.08E-01	2	18	"ACTA2,EDN1"
GO: Biological Process	negative regulation of systemic arterial blood pressure	3.39E-02	1.08E-01	2	18	"IER3,PRCP"
GO: Biological Process	myeloid leukocyte cytokine production	3.39E-02	1.08E-01	2	18	"SEMA7A,CD74"
GO: Biological Process	vascular endothelial growth factor signaling pathway	3.39E-02	1.08E-01	2	18	"XDH,PDGFB"
GO: Biological Process	parturition	3.39E-02	1.08E-01	2	18	"EDN1,MAFF"
GO: Biological Process	cell differentiation involved in metanephros development	3.39E-02	1.08E-01	2	18	"PDGFB,STAT1"
GO: Biological Process	plasma lipoprotein particle assembly	3.39E-02	1.08E-01	2	18	"ABCA1,APOE"
GO: Biological Process	activation of protein kinase activity	3.41E-02	1.08E-01	9	272	"DAXX,GADD45G,ITGB3,ITGA1,BMP4,F2R,MAP3K6,PDGFB,CD74"
GO: Biological Process	carboxylic acid transport	3.41E-02	1.08E-01	9	272	"ACE,PPARG,SLC6A6,PLIN2,P2RY2,SLC1A5,SLC3A2,MYC,NMB"
GO: Biological Process	mitotic cell cycle	3.41E-02	1.08E-01	22	892	"PIM3,DAXX,HSPA2,CDKN1A,SIK1,BCL2L1,BMP4,WEE1,CKS1B,IER3,RGCC,GEM,NEK6,MYC,PSMB8,PSMB9,EDN1,PDGFB,IGF2,CCNY,CDH13,PIM1"
GO: Biological Process	response to light stimulus	3.42E-02	1.08E-01	10	316	"GPC3,DBH,CDKN1A,JUNB,NR2F6,CIRBP,MYC,PER1,APOE,CRY2"
GO: Biological Process	cytoplasmic pattern recognition receptor signaling pathway	3.44E-02	1.09E-01	3	44	"DHX58,IRF7,DDX60"
GO: Biological Process	negative regulation of protein binding	3.44E-02	1.09E-01	3	44	"MYC,IFIT2,IFIT1"
GO: Biological Process	regulation of mRNA stability	3.44E-02	1.09E-01	3	44	"ZFP36,CIRBP,IGF2BP1"
GO: Biological Process	positive regulation of lipid transport	3.44E-02	1.09E-01	3	44	"ABCA1,P2RY2,APOE"
GO: Biological Process	proteolysis	3.48E-02	1.10E-01	25	1047	"IL33,SERPINA3,ACE,UBE2L6,TIMP1,CFB,OLR1,USP18,TINAGL1,PRCP,PSMB8,PSMB9,UCHL1,ADAMTS6,APOE,NR1D1,RNF144B,CTSS,PLAU,CTRL,ISG15,PRSS23,MMP17,MMP2,SERPINE2"
GO: Biological Process	positive regulation of I-kappaB kinase/NF-kappaB signaling	3.49E-02	1.10E-01	6	149	"TGM2,GJA1,BST2,NEK6,F2R,LGALS1"
GO: Biological Process	negative regulation of immune effector process	3.51E-02	1.11E-01	4	76	"BST2,HLA-A,TAP1,IFIT1"
GO: Biological Process	organic acid transport	3.54E-02	1.12E-01	9	274	"ACE,PPARG,SLC6A6,PLIN2,P2RY2,SLC1A5,SLC3A2,MYC,NMB"
GO: Biological Process	regulation of nervous system development	3.59E-02	1.13E-01	16	599	"ACE,PPARG,GPR56,IRX3,BMP4,P2RY2,VIM,GPRC5B,APOE,CXCL12,SEMA7A,TNFRSF12A,FN1,LGALS1,FLRT2,SERPINE2"
GO: Biological Process	nucleotide biosynthetic process	3.61E-02	1.13E-01	10	319	"CMPK2,ABCA1,OAS2,OAS1,ADA,AK1,MYC,EDN1,UCK2,APOE"
GO: Biological Process	negative regulation of hydrolase activity	3.61E-02	1.13E-01	10	319	"SERPINA3,GPC3,TIMP1,BCL2L1,BST2,SERPINE1,IFIT1,IFI16,CRY2,SERPINE2"
GO: Biological Process	epithelial cell morphogenesis	3.64E-02	1.14E-01	3	45	"COL18A1,BMP4,STAT1"
GO: Biological Process	regulation of interleukin-8 production	3.64E-02	1.14E-01	3	45	"ZNF580,SERPINE1,F2R"
GO: Biological Process	regulation of bone remodeling	3.64E-02	1.14E-01	3	45	"GJA1,ITGB3,INPP5D"
GO: Biological Process	embryo implantation	3.64E-02	1.14E-01	3	45	"TIMP1,KLF9,MMP2"
GO: Biological Process	regulation of gliogenesis	3.66E-02	1.14E-01	4	77	"PPARG,BMP4,VIM,SERPINE2"
GO: Biological Process	secretion by tissue	3.66E-02	1.14E-01	4	77	"ADA,XDH,P2RY2,APLN"
GO: Biological Process	response to metal ion	3.68E-02	1.15E-01	9	276	"B2M,PPARG,JUNB,XDH,MT1H,FABP4,VCAM1,CD14,FN1"
GO: Biological Process	appendage morphogenesis	3.69E-02	1.15E-01	6	151	"GPC3,GJA1,BMP4,ALDH1A2,CYP26B1,ZBTB16"
GO: Biological Process	limb morphogenesis	3.69E-02	1.15E-01	6	151	"GPC3,GJA1,BMP4,ALDH1A2,CYP26B1,ZBTB16"
GO: Biological Process	"DNA-templated transcription, initiation"	3.69E-02	1.15E-01	8	233	"PPARG,JUNB,NR2F6,SERPINE1,NR1D2,MYC,NR1D1,CTGF"
GO: Biological Process	regulation of cell projection organization	3.73E-02	1.16E-01	11	366	"P2RY2,VIM,GPRC5B,APOE,CXCL12,CDC42EP4,SEMA7A,TNFRSF12A,FN1,LGALS1,SERPINE2"
GO: Biological Process	regulation of anoikis	3.75E-02	1.16E-01	2	19	"SIK1,BCL2L1"
GO: Biological Process	regulation of cholesterol efflux	3.75E-02	1.16E-01	2	19	"ABCA1,APOE"
GO: Biological Process	positive regulation of neutrophil chemotaxis	3.75E-02	1.16E-01	2	19	"EDN1,CD74"
GO: Biological Process	mesenchymal to epithelial transition	3.75E-02	1.16E-01	2	19	"BMP4,STAT1"
GO: Biological Process	negative regulation of leukocyte migration	3.75E-02	1.16E-01	2	19	"IL33,ADA"
GO: Biological Process	detection of bacterium	3.75E-02	1.16E-01	2	19	"HLA-DRB5,HLA-A"
GO: Biological Process	energy homeostasis	3.75E-02	1.16E-01	2	19	"NR1D2,PRCP"
GO: Biological Process	negative regulation of protein processing	3.75E-02	1.16E-01	2	19	"SERPINE1,SERPINE2"
GO: Biological Process	renal vesicle morphogenesis	3.75E-02	1.16E-01	2	19	"BMP4,STAT1"
GO: Biological Process	regulation of cell morphogenesis involved in differentiation	3.77E-02	1.17E-01	8	234	"RGCC,VIM,APOE,CXCL12,SEMA7A,TNFRSF12A,FN1,STAT1"
GO: Biological Process	nucleoside phosphate biosynthetic process	3.81E-02	1.18E-01	10	322	"CMPK2,ABCA1,OAS2,OAS1,ADA,AK1,MYC,EDN1,UCK2,APOE"
GO: Biological Process	positive regulation of T cell proliferation	3.81E-02	1.18E-01	4	78	"CD274,IL15,VCAM1,IGF2"
GO: Biological Process	positive regulation of cell-substrate adhesion	3.81E-02	1.18E-01	4	78	"FBLN2,NPNT,CYR61,CDH13"
GO: Biological Process	cytokine biosynthetic process	3.83E-02	1.18E-01	5	114	"GADD45G,IRF7,INPP5D,INHBB,IGF2BP1"
GO: Biological Process	cellular response to amino acid stimulus	3.85E-02	1.19E-01	3	46	"BCL2L1,COL4A1,MMP2"
GO: Biological Process	cellular response to DNA damage stimulus	3.86E-02	1.19E-01	18	703	"PARP9,CDKN1A,BCL2L1,HMGA1,IRF7,IER3,NEK6,MYC,PSMB8,PSMB9,CXCL12,ZSWIM7,IFI16,MNDA,CRY2,DTX3L,CD74,DDIT4"
GO: Biological Process	transmembrane receptor protein tyrosine kinase signaling pathway	3.91E-02	1.20E-01	18	704	"CDKN1A,SULF2,ITGB3,ITGA1,BMP4,XDH,ANGPT2,ERRFI1,CRIM1,PDGFB,PDGFA,SOCS3,IGF2,IGFBP3,CTGF,CDH13,STAT1,DDIT4"
GO: Biological Process	cellular response to abiotic stimulus	3.93E-02	1.21E-01	8	236	"GJA1,CDKN1A,BCL2L1,MYC,RHOB,IFI16,EGR1,CRY2"
GO: Biological Process	telencephalon development	3.94E-02	1.21E-01	7	194	"GPR56,BMP4,MDK,CXCL12,SEMA7A,TACC2,LHX6"
GO: Biological Process	positive regulation of cell growth	3.96E-02	1.21E-01	5	115	"APOE,CXCL12,SEMA7A,TNFRSF12A,FN1"
GO: Biological Process	response to ethanol	3.96E-02	1.21E-01	5	115	"DBH,VCAM1,APOE,CD14,EGR1"
GO: Biological Process	developmental cell growth	3.96E-02	1.21E-01	5	115	"APOE,CXCL12,SEMA7A,TNFRSF12A,FN1"
GO: Biological Process	cellular component disassembly	3.97E-02	1.22E-01	12	416	"TIMP1,HSPA2,COL18A1,HMGA1,NEK6,VIM,CAPG,COL4A1,COL4A2,SHROOM2,MMP2,DDIT4"
GO: Biological Process	humoral immune response	4.00E-02	1.22E-01	6	154	"CFB,BST2,RGCC,HLA-DRB5,HLA-DQB1,HLA-DMA"
GO: Biological Process	I-kappaB kinase/NF-kappaB signaling	4.01E-02	1.23E-01	8	237	"TGM2,GJA1,BST2,NEK6,F2R,CD14,LGALS1,STAT1"
GO: Biological Process	exocytosis	4.01E-02	1.23E-01	10	325	"ACE,TIMP1,ACTN1,ITGB3,SERPINE1,PDGFB,PDGFA,IGF2,FN1,CD63"
GO: Biological Process	regulation of protein catabolic process	4.03E-02	1.23E-01	7	195	"IL33,GPC3,TIMP1,GJA1,IER3,APOE,SERPINE2"
GO: Biological Process	interleukin-1 beta production	4.07E-02	1.24E-01	3	47	"ABCA1,F2R,IFI16"
GO: Biological Process	leukocyte cell-cell adhesion	4.07E-02	1.24E-01	3	47	"OLR1,SELE,VCAM1"
GO: Biological Process	regulation of RNA stability	4.07E-02	1.24E-01	3	47	"ZFP36,CIRBP,IGF2BP1"
GO: Biological Process	calcium-mediated signaling	4.08E-02	1.24E-01	5	116	"ADA,SELE,EDN1,RCAN3,CDH13"
GO: Biological Process	arachidonic acid secretion	4.12E-02	1.24E-01	2	20	"ACE,NMB"
GO: Biological Process	renal vesicle development	4.12E-02	1.24E-01	2	20	"BMP4,STAT1"
GO: Biological Process	glial cell migration	4.12E-02	1.24E-01	2	20	"VIM,FN1"
GO: Biological Process	positive regulation of neutrophil migration	4.12E-02	1.24E-01	2	20	"EDN1,CD74"
GO: Biological Process	positive regulation of phosphatase activity	4.12E-02	1.24E-01	2	20	"ITGA1,NPNT"
GO: Biological Process	positive regulation of hemostasis	4.12E-02	1.24E-01	2	20	"SERPINE1,F2R"
GO: Biological Process	positive regulation of vascular endothelial growth factor receptor signaling pathway	4.12E-02	1.24E-01	2	20	"ITGB3,BMP4"
GO: Biological Process	protein-lipid complex assembly	4.12E-02	1.24E-01	2	20	"ABCA1,APOE"
GO: Biological Process	negative regulation of extrinsic apoptotic signaling pathway via death domain receptors	4.12E-02	1.24E-01	2	20	"SERPINE1,ITPRIP"
GO: Biological Process	negative regulation of T cell apoptotic process	4.12E-02	1.24E-01	2	20	"ADA,BMP4"
GO: Biological Process	innervation	4.12E-02	1.24E-01	2	20	"SULF2,SERPINE2"
GO: Biological Process	regulation of homotypic cell-cell adhesion	4.12E-02	1.24E-01	2	20	"LGALS1,SERPINE2"
GO: Biological Process	response to ischemia	4.12E-02	1.24E-01	2	20	"BCL2L1,UCHL1"
GO: Biological Process	positive regulation of blood coagulation	4.12E-02	1.24E-01	2	20	"SERPINE1,F2R"
GO: Biological Process	regulation of fat cell differentiation	4.12E-02	1.24E-01	4	80	"PPARG,NR1D1,JDP2,ZBTB16"
GO: Biological Process	regulation of carbohydrate biosynthetic process	4.12E-02	1.24E-01	4	80	"SIK1,PDGFB,IGF2,NR1D1"
GO: Biological Process	heart development	4.16E-02	1.25E-01	13	466	"ACE,PPARG,GPC3,GJA1,SIK1,BMP4,ALDH1A2,VCAM1,EDN1,LY6E,PDGFB,MKL2,CYR61"
GO: Biological Process	response to insulin	4.21E-02	1.27E-01	9	283	"PPARG,INHBB,UCP2,PDGFB,SOCS3,APOE,IGF2,EGR1,STAT1"
GO: Biological Process	cell aging	4.28E-02	1.29E-01	4	81	"CDKN1A,HMGA1,SERPINE1,NEK6"
GO: Biological Process	anterior/posterior axis specification	4.29E-02	1.29E-01	3	48	"GPC3,HOXD8,BMP4"
GO: Biological Process	negative regulation of blood pressure	4.29E-02	1.29E-01	3	48	"IER3,PRCP,APLN"
GO: Biological Process	cytokine metabolic process	4.34E-02	1.30E-01	5	118	"GADD45G,IRF7,INPP5D,INHBB,IGF2BP1"
GO: Biological Process	regulation of lipase activity	4.34E-02	1.30E-01	5	118	"ITGA1,SELE,GPIHBP1,CYR61,CRY2"
GO: Biological Process	protein catabolic process	4.39E-02	1.31E-01	16	615	"IL33,ACE,UBE2L6,GPC3,TIMP1,GJA1,USP18,IER3,PSMB8,PSMB9,UCHL1,APOE,NR1D1,RNF144B,ISG15,SERPINE2"
GO: Biological Process	developmental growth involved in morphogenesis	4.43E-02	1.32E-01	6	158	"BMP4,APOE,CXCL12,SEMA7A,TNFRSF12A,FN1"
GO: Biological Process	leukocyte mediated cytotoxicity	4.45E-02	1.32E-01	4	82	"B2M,HLA-E,HLA-A,TAP1"
GO: Biological Process	retinoid metabolic process	4.45E-02	1.32E-01	4	82	"GPC3,ALDH1A2,APOE,CYP26B1"
GO: Biological Process	pattern specification process	4.46E-02	1.32E-01	13	471	"GPC3,GJA1,HOXB9,HOXD8,IRX3,BMP4,SHROOM3,NR2F2,ALDH1A2,EDN1,CXCL12,CYP26B1,ZBTB16"
GO: Biological Process	nephron tubule morphogenesis	4.50E-02	1.32E-01	2	21	"GPC3,IRX3"
GO: Biological Process	labyrinthine layer blood vessel development	4.50E-02	1.32E-01	2	21	"JUNB,CYR61"
GO: Biological Process	positive regulation of heart rate	4.50E-02	1.32E-01	2	21	"ADA,EDN1"
GO: Biological Process	negative regulation of cell-matrix adhesion	4.50E-02	1.32E-01	2	21	"SERPINE1,ACER2"
GO: Biological Process	positive regulation of erythrocyte differentiation	4.50E-02	1.32E-01	2	21	"INPP5D,ISG15"
GO: Biological Process	negative regulation of lymphocyte mediated immunity	4.50E-02	1.32E-01	2	21	"HLA-A,TAP1"
GO: Biological Process	response to corticosterone	4.50E-02	1.32E-01	2	21	"CDKN1A,JUNB"
GO: Biological Process	regulation of osteoblast proliferation	4.50E-02	1.32E-01	2	21	"ITGB3,CYR61"
GO: Biological Process	detection of other organism	4.50E-02	1.32E-01	2	21	"HLA-DRB5,HLA-A"
GO: Biological Process	thymocyte apoptotic process	4.50E-02	1.32E-01	2	21	"ADA,BMP4"
GO: Biological Process	interleukin-8 production	4.51E-02	1.32E-01	3	49	"ZNF580,SERPINE1,F2R"
GO: Biological Process	regulation of cellular response to insulin stimulus	4.51E-02	1.32E-01	3	49	"PPARG,SOCS3,IGF2"
GO: Biological Process	regulation of stress fiber assembly	4.51E-02	1.32E-01	3	49	"SYNPO,RGCC,CTGF"
GO: Biological Process	vascular endothelial growth factor receptor signaling pathway	4.51E-02	1.32E-01	3	49	"ITGB3,BMP4,PDGFB"
GO: Biological Process	regulation of cytoskeleton organization	4.52E-02	1.32E-01	10	332	"BST2,SYNPO,RGCC,CAPG,EDN1,PDGFA,CXCL12,SHROOM2,CTGF,ELN"
GO: Biological Process	osteoblast differentiation	4.55E-02	1.32E-01	6	159	"GJA1,JUNB,BMP4,NPNT,CYR61,IFI16"
GO: Biological Process	regulation of stem cell proliferation	4.61E-02	1.32E-01	4	83	"BMP4,MYC,PDGFA,STAT1"
GO: Biological Process	gliogenesis	4.62E-02	1.32E-01	7	201	"PPARG,BMP4,VIM,APOE,FN1,EGR1,SERPINE2"
GO: Biological Process	positive regulation of MAP kinase activity	4.62E-02	1.32E-01	7	201	"DAXX,ITGA1,EDN1,MAP3K6,PDGFB,PDGFA,CD74"
GO: Biological Process	cellular response to extracellular stimulus	4.66E-02	1.32E-01	6	160	"DAP,CDKN1A,INHBB,IL15,UCP2,IFI16"
GO: Biological Process	stress-activated protein kinase signaling cascade	4.72E-02	1.32E-01	8	245	"DAXX,GADD45G,XDH,MYC,EDN1,MAP3K6,ERRFI1,CTGF"
GO: Biological Process	monocarboxylic acid biosynthetic process	4.72E-02	1.32E-01	7	202	"BGN,ALDH1A2,EDN1,LTC4S,CH25H,NR1D1,CD74"
GO: Biological Process	gland morphogenesis	4.74E-02	1.32E-01	5	121	"TGM2,BMP4,PDGFB,PDGFA,MMP2"
GO: Biological Process	signal transduction by p53 class mediator	4.78E-02	1.32E-01	6	161	"CDKN1A,PSMB8,PSMB9,IFI16,CD74,DDIT4"
GO: Biological Process	glucose catabolic process	4.79E-02	1.32E-01	4	84	"IER3,MYC,PFKFB3,DDIT4"
GO: Biological Process	modification of morphology or physiology of other organism	4.79E-02	1.32E-01	4	84	"BCL2L1,MYC,TAP1,IFIT1"
GO: Biological Process	positive regulation of cell cycle arrest	4.79E-02	1.32E-01	4	84	"CDKN1A,RGCC,PSMB8,PSMB9"
GO: Biological Process	negative regulation of helicase activity	4.79E-02	1.32E-01	1	3	IFIT1
GO: Biological Process	plasma kallikrein-kinin cascade	4.79E-02	1.32E-01	1	3	PRCP
GO: Biological Process	fibroblast growth factor production	4.79E-02	1.32E-01	1	3	RGCC
GO: Biological Process	negative regulation of viral-induced cytoplasmic pattern recognition receptor signaling pathway	4.79E-02	1.32E-01	1	3	DHX58
GO: Biological Process	regulation of MyD88-dependent toll-like receptor signaling pathway	4.79E-02	1.32E-01	1	3	IRF7
GO: Biological Process	positive regulation of ATP biosynthetic process	4.79E-02	1.32E-01	1	3	MYC
GO: Biological Process	negative regulation of cholesterol biosynthetic process	4.79E-02	1.32E-01	1	3	APOE
GO: Biological Process	positive regulation of transcription from RNA polymerase II promoter involved in smooth muscle cell differentiation	4.79E-02	1.32E-01	1	3	NPNT
GO: Biological Process	apoptotic process in bone marrow	4.79E-02	1.32E-01	1	3	BCL2L1
GO: Biological Process	regulation of toll-like receptor 9 signaling pathway	4.79E-02	1.32E-01	1	3	RSAD2
GO: Biological Process	trachea formation	4.79E-02	1.32E-01	1	3	BMP4
GO: Biological Process	inosine biosynthetic process	4.79E-02	1.32E-01	1	3	ADA
GO: Biological Process	positive regulation of sphingolipid biosynthetic process	4.79E-02	1.32E-01	1	3	CYR61
GO: Biological Process	response to high density lipoprotein particle	4.79E-02	1.32E-01	1	3	ABCA1
GO: Biological Process	endodermal-mesodermal cell signaling involved in heart induction	4.79E-02	1.32E-01	1	3	BMP4
GO: Biological Process	cellular response to low-density lipoprotein particle stimulus	4.79E-02	1.32E-01	1	3	CDH13
GO: Biological Process	connective tissue replacement involved in inflammatory response wound healing	4.79E-02	1.32E-01	1	3	F2R
GO: Biological Process	canonical Wnt signaling pathway involved in positive regulation of apoptotic process	4.79E-02	1.32E-01	1	3	MYC
GO: Biological Process	positive regulation of lipoprotein particle clearance	4.79E-02	1.32E-01	1	3	GPIHBP1
GO: Biological Process	negative regulation of epithelial cell differentiation involved in kidney development	4.79E-02	1.32E-01	1	3	STAT1
GO: Biological Process	leucine transport	4.79E-02	1.32E-01	1	3	SLC3A2
GO: Biological Process	negative regulation of RIG-I signaling pathway	4.79E-02	1.32E-01	1	3	DHX58
GO: Biological Process	regulation of fibroblast growth factor production	4.79E-02	1.32E-01	1	3	RGCC
GO: Biological Process	positive regulation of mitochondrial membrane potential	4.79E-02	1.32E-01	1	3	MYC
GO: Biological Process	drug export	4.79E-02	1.32E-01	1	3	ABCG2
GO: Biological Process	purine nucleobase catabolic process	4.79E-02	1.32E-01	1	3	XDH
GO: Biological Process	cloacal septation	4.79E-02	1.32E-01	1	3	BMP4
GO: Biological Process	"substrate-dependent cell migration, cell attachment to substrate"	4.79E-02	1.32E-01	1	3	TNFRSF12A
GO: Biological Process	pyrimidine deoxyribonucleoside diphosphate biosynthetic process	4.79E-02	1.32E-01	1	3	CMPK2
GO: Biological Process	cellular response to isoquinoline alkaloid	4.79E-02	1.32E-01	1	3	EGR1
GO: Biological Process	positive regulation of hyaluronan biosynthetic process	4.79E-02	1.32E-01	1	3	PDGFB
GO: Biological Process	positive regulation of prostaglandin-endoperoxide synthase activity	4.79E-02	1.32E-01	1	3	EDN1
GO: Biological Process	regulation of dendritic cell cytokine production	4.79E-02	1.32E-01	1	3	BST2
GO: Biological Process	negative regulation of trophoblast cell migration	4.79E-02	1.32E-01	1	3	TIMP1
GO: Biological Process	putrescine biosynthetic process	4.79E-02	1.32E-01	1	3	ODC1
GO: Biological Process	cell communication by chemical coupling	4.79E-02	1.32E-01	1	3	GJA1
GO: Biological Process	epicardial cell to mesenchymal cell transition	4.79E-02	1.32E-01	1	3	GJA1
GO: Biological Process	regulation of ribonuclease activity	4.79E-02	1.32E-01	1	3	OAS1
GO: Biological Process	angiotensin catabolic process in blood	4.79E-02	1.32E-01	1	3	ACE
GO: Biological Process	kidney mesenchymal cell proliferation	4.79E-02	1.32E-01	1	3	STAT1
GO: Biological Process	nitric oxide transport	4.79E-02	1.32E-01	1	3	EDN1
GO: Biological Process	pyrimidine deoxyribonucleoside diphosphate metabolic process	4.79E-02	1.32E-01	1	3	CMPK2
GO: Biological Process	response to carbon monoxide	4.79E-02	1.32E-01	1	3	EGR1
GO: Biological Process	negative regulation of syncytium formation by plasma membrane fusion	4.79E-02	1.32E-01	1	3	STAT1
GO: Biological Process	regulation of gene expression involved in extracellular matrix organization	4.79E-02	1.32E-01	1	3	RGCC
GO: Biological Process	negative regulation of cholesterol metabolic process	4.79E-02	1.32E-01	1	3	APOE
GO: Biological Process	antigen processing and presentation of exogenous peptide antigen via MHC class Ib	4.79E-02	1.32E-01	1	3	B2M
GO: Biological Process	establishment of synaptic specificity at neuromuscular junction	4.79E-02	1.32E-01	1	3	F2R
GO: Biological Process	negative regulation of glomerular mesangial cell proliferation	4.79E-02	1.32E-01	1	3	BMP4
GO: Biological Process	positive regulation of ceramide biosynthetic process	4.79E-02	1.32E-01	1	3	CYR61
GO: Biological Process	purine deoxyribonucleoside metabolic process	4.79E-02	1.32E-01	1	3	ADA
GO: Biological Process	positive regulation of cellular respiration	4.79E-02	1.32E-01	1	3	MYC
GO: Biological Process	regulation of extracellular matrix constituent secretion	4.79E-02	1.32E-01	1	3	RGCC
GO: Biological Process	regulation of prostaglandin-endoperoxide synthase activity	4.79E-02	1.32E-01	1	3	EDN1
GO: Biological Process	antigen processing and presentation of endogenous peptide antigen via MHC class Ib	4.79E-02	1.32E-01	1	3	HLA-E
GO: Biological Process	angiogenesis involved in coronary vascular morphogenesis	4.79E-02	1.32E-01	1	3	ACE
GO: Biological Process	negative regulation of mesenchymal to epithelial transition involved in metanephros morphogenesis	4.79E-02	1.32E-01	1	3	STAT1
GO: Biological Process	gene expression involved in extracellular matrix organization	4.79E-02	1.32E-01	1	3	RGCC
GO: Biological Process	CTP salvage	4.79E-02	1.32E-01	1	3	UCK2
GO: Biological Process	negative regulation of cell-cell adhesion mediated by cadherin	4.79E-02	1.32E-01	1	3	RGCC
GO: Biological Process	endodermal-mesodermal cell signaling	4.79E-02	1.32E-01	1	3	BMP4
GO: Biological Process	senescence-associated heterochromatin focus assembly	4.79E-02	1.32E-01	1	3	HMGA1
GO: Biological Process	plasma cell differentiation	4.79E-02	1.32E-01	1	3	LGALS1
GO: Biological Process	negative regulation of protein glycosylation	4.79E-02	1.32E-01	1	3	ACER2
GO: Biological Process	positive regulation of corticotropin-releasing hormone secretion	4.79E-02	1.32E-01	1	3	APLN
GO: Biological Process	male germ-line stem cell division	4.79E-02	1.32E-01	1	3	ZBTB16
GO: Biological Process	diterpenoid catabolic process	4.79E-02	1.32E-01	1	3	CYP26B1
GO: Biological Process	endosomal lumen acidification	4.79E-02	1.32E-01	1	3	AQP11
GO: Biological Process	metanephric mesenchymal cell proliferation involved in metanephros development	4.79E-02	1.32E-01	1	3	STAT1
GO: Biological Process	positive regulation of extracellular matrix constituent secretion	4.79E-02	1.32E-01	1	3	RGCC
GO: Biological Process	B cell selection	4.79E-02	1.32E-01	1	3	HLA-DQB1
GO: Biological Process	leukotriene production involved in inflammatory response	4.79E-02	1.32E-01	1	3	SERPINE1
GO: Biological Process	cellular process regulating host cell cycle in response to virus	4.79E-02	1.32E-01	1	3	BCL2L1
GO: Biological Process	retinoic acid catabolic process	4.79E-02	1.32E-01	1	3	CYP26B1
GO: Biological Process	positive regulation of T-helper 2 cell cytokine production	4.79E-02	1.32E-01	1	3	RSAD2
GO: Biological Process	positive regulation of interleukin-10 secretion	4.79E-02	1.32E-01	1	3	CD274
GO: Biological Process	negative regulation of T-helper 1 type immune response	4.79E-02	1.32E-01	1	3	IL33
GO: Biological Process	germ-line stem cell division	4.79E-02	1.32E-01	1	3	ZBTB16
GO: Biological Process	positive regulation of gene expression involved in extracellular matrix organization	4.79E-02	1.32E-01	1	3	RGCC
GO: Biological Process	ureter urothelium development	4.79E-02	1.32E-01	1	3	BMP4
GO: Biological Process	regulation of thyroid hormone mediated signaling pathway	4.79E-02	1.32E-01	1	3	PRCP
GO: Biological Process	adenosine catabolic process	4.79E-02	1.32E-01	1	3	ADA
GO: Biological Process	pyrimidine nucleoside diphosphate biosynthetic process	4.79E-02	1.32E-01	1	3	CMPK2
GO: Biological Process	mesodermal cell fate determination	4.79E-02	1.32E-01	1	3	BMP4
GO: Biological Process	"antigen processing and presentation of exogenous protein antigen via MHC class Ib, TAP-dependent"	4.79E-02	1.32E-01	1	3	B2M
GO: Biological Process	rubidium ion transport	4.79E-02	1.32E-01	1	3	CD63
GO: Biological Process	pilomotor reflex	4.79E-02	1.32E-01	1	3	NPNT
GO: Biological Process	dense core granule biogenesis	4.79E-02	1.32E-01	1	3	SERPINE2
GO: Biological Process	negative regulation of nephron tubule epithelial cell differentiation	4.79E-02	1.32E-01	1	3	STAT1
GO: Biological Process	response to blue light	4.79E-02	1.32E-01	1	3	CRY2
GO: Biological Process	negative regulation of low-density lipoprotein particle receptor biosynthetic process	4.79E-02	1.32E-01	1	3	ITGB3
GO: Biological Process	BMP signaling pathway involved in heart induction	4.79E-02	1.32E-01	1	3	BMP4
GO: Biological Process	regulation of ion transport	4.83E-02	1.33E-01	14	525	"ACE,GJA1,KCNB1,SIK1,KCND3,CYBB,P2RY2,CXCL10,F2R,PDGFB,CXCL12,CRY2,SERPINE2,CD63"
GO: Biological Process	glycosaminoglycan metabolic process	4.90E-02	1.34E-01	6	162	"GPC3,BGN,CHST2,IL15,PDGFB,PIM1"
GO: Biological Process	thymic T cell selection	4.90E-02	1.34E-01	2	22	"HLA-DMA,CD74"
GO: Biological Process	negative regulation of cyclin-dependent protein serine/threonine kinase activity	4.90E-02	1.34E-01	2	22	"CDKN1A,NR2F2"
GO: Biological Process	regulation of systemic arterial blood pressure by circulatory renin-angiotensin	4.90E-02	1.34E-01	2	22	"ACE,F2R"
GO: Biological Process	regulation of cell aging	4.90E-02	1.34E-01	2	22	"HMGA1,NEK6"
GO: Biological Process	cartilage condensation	4.90E-02	1.34E-01	2	22	"CTGF,MGP"
GO: Biological Process	reflex	4.90E-02	1.34E-01	2	22	"GJA1,NPNT"
GO: Biological Process	positive regulation of steroid biosynthetic process	4.90E-02	1.34E-01	2	22	"IGF2,NR1D1"
GO: Biological Process	positive regulation of interleukin-8 production	4.90E-02	1.34E-01	2	22	"ZNF580,SERPINE1"
GO: Biological Process	positive regulation of granulocyte chemotaxis	4.90E-02	1.34E-01	2	22	"EDN1,CD74"
GO: Biological Process	regulation of neuron migration	4.90E-02	1.34E-01	2	22	"GPR56,FLRT2"
GO: Biological Process	cell morphogenesis involved in neuron differentiation	4.94E-02	1.35E-01	16	625	"UNC5A,ITGB3,ITGA1,VIM,S100A6,UCHL1,APOE,CXCL12,COL4A1,COL4A2,SEMA7A,TYROBP,TNFRSF12A,FN1,RHOB,FLRT2"
GO: Biological Process	'de novo' posttranslational protein folding	4.98E-02	1.36E-01	3	51	"TUBB6,HLA-DMA,CD74"
GO: Biological Process	regulation of systemic arterial blood pressure mediated by a chemical signal	4.98E-02	1.36E-01	3	51	"ACE,F2R,EDN1"
GO: Biological Process	cellular response to drug	4.98E-02	1.36E-01	3	51	"MYC,ACER2,EGR1"
GO: Biological Process	regulation of mitotic cell cycle phase transition	5.00E-02	1.36E-01	8	248	"CDKN1A,BCL2L1,IER3,RGCC,NEK6,PSMB8,PSMB9,PIM1"
